# Supplementary material for: IMK/IAA MIPAS retrievals version 8: CH 4 and N 2 O
Source: Copernicus journal article supplement (doi:10.5194/egusphere-2023-919), 2023-06-16
Supplement: Supplementary file 1 [file egusphere-2023-919-supplement.pdf]

Manuscript prepared for Atmos. Meas. Tech.  
with version 2015/04/24 7.83 Copernicus papers of the L<sup>A</sup>T<sub>E</sub>X class coperni-  
cus.cls.  
Date: 15 June 2023

*Supplement to*

## **MIPAS IMK/IAA version 8 retrieval of methane and nitrous oxide**

**Norbert Glatthor et al.**

*Correspondence to:* Norbert Glatthor (norbert.glatthor@kit.edu)

**Contents**

|                                                                                                             |            |
|-------------------------------------------------------------------------------------------------------------|------------|
| <b>S1 Overview</b>                                                                                          | <b>3</b>   |
| <b>S2 Methane error contribution profile plots and tabulated values for FR NOM data (V8H_CH4_61)</b>        | <b>5</b>   |
| <b>S3 Methane error contribution profile plots and tabulated values for RR NOM data (V8R_CH4_261)</b>       | <b>40</b>  |
| <b>S4 Methane error contribution profile plots and tabulated values for RR MA data (V8R_CH4_561)</b>        | <b>75</b>  |
| <b>S5 Methane error contribution profile plots and tabulated values for RR UA data (V8R_CH4_662)</b>        | <b>110</b> |
| <b>S6 Nitrous oxide error contribution profile plots and tabulated values for FR NOM data (V8H_N2O_61)</b>  | <b>145</b> |
| <b>S7 Nitrous oxide error contribution profile plots and tabulated values for RR NOM data (V8R_N2O_261)</b> | <b>180</b> |
| <b>S8 Nitrous oxide error contribution profile plots and tabulated values for RR MA data (V8R_N2O_561)</b>  | <b>215</b> |
| <b>S9 Nitrous oxide error contribution profile plots and tabulated values for RR UA data (V8R_N2O_662)</b>  | <b>250</b> |

## S1 Overview

This document serves as reference for the definition of the representative atmospheres used for the calculation of methane and nitrous oxide error budgets, as listed in Tab. S1, and as collection of the respective error budgets for methane and nitrous oxide retrievals for different measurement modes and periods:

- Nominal measurement mode (NOM) CH<sub>4</sub> errors for the FR period (V8H\_CH4\_61, 2002-2004), which are listed in tables S2–S35 and depicted in figures S1–S34,
- Nominal measurement mode (NOM) CH<sub>4</sub> errors for the RR period (V8R\_CH4\_261, 2005-2012), which are listed in tables S36–S69 and depicted in figures S35–S68.
- Middle Atmosphere measurement mode (MA) CH<sub>4</sub> errors for the RR period (V8R\_CH4\_561, 2005-2012), which are listed in tables S70–S103 and depicted in figures S69–S102.
- Upper Atmosphere measurement mode (UA) CH<sub>4</sub> errors at low solar activity for the RR period (V8R\_CH4\_662, 2005-2012), which are listed in tables S104–S137 and depicted in figures S103–S136.
- Nominal measurement mode (NOM) N<sub>2</sub>O errors for the FR period (V8H\_N2O\_61, 2002-2004), which are listed in tables S138–S171 and depicted in figures S137–S170,
- Nominal measurement mode (NOM) N<sub>2</sub>O errors for the RR period (V8R\_N2O\_261, 2005-2012), which are listed in tables S172–S205 and depicted in figures S171–S204.
- Middle Atmosphere measurement mode (MA) N<sub>2</sub>O errors for the RR period (V8R\_N2O\_561, 2005-2012), which are listed in tables S206–S239 and depicted in figures S205–S238.
- Upper Atmosphere measurement mode (UA) N<sub>2</sub>O errors at low solar activity for the RR period (V8R\_N2O\_662, 2005-2012), which are listed in tables S240–S273 and depicted in figures S239–S272.

In the plots, the errors are presented as relative errors in percent, regardless of whether they are additive or multiplicative errors. They were calculated with respect to the average gas profiles that were calculated from the single geolocations which contribute to the respective representative atmospheres.

**Table S0.** Labels and definitions of the representative atmospheric conditions which were used to calculate the error budget. Daytime atmospheres are defined by solar zenith angles  $< 90^\circ$ . Nighttime atmospheres are defined by solar zenith angles  $> 95^\circ$  for NOM observations,  $> 98^\circ$  for MA observations, and  $> 100^\circ$  for UA observations.

| representative atmosphere label   | month(s) used | latitude range                        |
|-----------------------------------|---------------|---------------------------------------|
| Northern polar winter day         | Jan, Feb      | $65^\circ\text{N} - 90^\circ\text{N}$ |
| Northern polar winter night       | Jan, Feb      | $65^\circ\text{N} - 90^\circ\text{N}$ |
| Northern polar spring day         | Apr           | $65^\circ\text{N} - 90^\circ\text{N}$ |
| Northern polar spring night       | Apr           | $65^\circ\text{N} - 90^\circ\text{N}$ |
| Northern polar summer day         | Jul, Aug      | $65^\circ\text{N} - 90^\circ\text{N}$ |
| Northern polar summer night       | Jul, Aug      | $65^\circ\text{N} - 90^\circ\text{N}$ |
| Northern polar autumn day         | Oct           | $65^\circ\text{N} - 90^\circ\text{N}$ |
| Northern polar autumn night       | Oct           | $65^\circ\text{N} - 90^\circ\text{N}$ |
| Northern midlatitude winter day   | Jan, Feb      | $40^\circ\text{N} - 60^\circ\text{N}$ |
| Northern midlatitude winter night | Jan, Feb      | $40^\circ\text{N} - 60^\circ\text{N}$ |
| Northern midlatitude spring day   | Apr           | $40^\circ\text{N} - 60^\circ\text{N}$ |
| Northern midlatitude spring night | Apr           | $40^\circ\text{N} - 60^\circ\text{N}$ |
| Northern midlatitude summer day   | Jul, Aug      | $40^\circ\text{N} - 60^\circ\text{N}$ |
| Northern midlatitude summer night | Jul, Aug      | $40^\circ\text{N} - 60^\circ\text{N}$ |
| Northern midlatitude autumn day   | Oct           | $40^\circ\text{N} - 60^\circ\text{N}$ |
| Northern midlatitude autumn night | Oct           | $40^\circ\text{N} - 60^\circ\text{N}$ |
| Tropics day                       | Apr           | $20^\circ\text{S} - 20^\circ\text{N}$ |
| Tropics night                     | Apr           | $20^\circ\text{S} - 20^\circ\text{N}$ |
| Southern midlatitude winter day   | Jul, Aug      | $40^\circ\text{S} - 60^\circ\text{S}$ |
| Southern midlatitude winter night | Jul, Aug      | $40^\circ\text{S} - 60^\circ\text{S}$ |
| Southern midlatitude spring day   | Oct           | $40^\circ\text{S} - 60^\circ\text{S}$ |
| Southern midlatitude spring night | Oct           | $40^\circ\text{S} - 60^\circ\text{S}$ |
| Southern midlatitude summer day   | Jan, Feb      | $40^\circ\text{S} - 60^\circ\text{S}$ |
| Southern midlatitude summer night | Jan, Feb      | $40^\circ\text{S} - 60^\circ\text{S}$ |
| Southern midlatitude autumn day   | Apr           | $40^\circ\text{S} - 60^\circ\text{S}$ |
| Southern midlatitude autumn night | Apr           | $40^\circ\text{S} - 60^\circ\text{S}$ |
| Southern polar winter day         | Jul, Aug      | $65^\circ\text{S} - 90^\circ\text{S}$ |
| Southern polar winter night       | Jul, Aug      | $65^\circ\text{S} - 90^\circ\text{S}$ |
| Southern polar spring day         | Oct           | $65^\circ\text{S} - 90^\circ\text{S}$ |
| Southern polar spring night       | Oct           | $65^\circ\text{S} - 90^\circ\text{S}$ |
| Southern polar summer day         | Jan, Feb      | $65^\circ\text{S} - 90^\circ\text{S}$ |
| Southern polar summer night       | Jan, Feb      | $65^\circ\text{S} - 90^\circ\text{S}$ |
| Southern polar autumn day         | Apr           | $65^\circ\text{S} - 90^\circ\text{S}$ |
| Southern polar autumn night       | Apr           | $65^\circ\text{S} - 90^\circ\text{S}$ |



**S2 Methane error contribution profile plots and  
tabulated values for FR NOM data (V8H\_CH4\_61)**

**Table S1.** Methane error budget for Northern polar winter day. All uncertainties are  $1\sigma$ .

| altitude<br>(km) | mean target<br>(ppbv) | interf<br>(ppbv) | ILS<br>(ppbv) | shift<br>(ppbv) | offset<br>(ppbv) | gain<br>(ppbv) | spectro<br>(ppbv) | T+LOS<br>(ppbv) | noise<br>(ppbv) | random<br>(ppbv) | syst<br>(ppbv) | total<br>(ppbv) |
|------------------|-----------------------|------------------|---------------|-----------------|------------------|----------------|-------------------|-----------------|-----------------|------------------|----------------|-----------------|
| 9                | 1703.54               | 25.61            | 11.15         | 1.50            | 25.12            | 62.87          | 253.64            | 38.68           | 72.17           | 149.18           | 232.70         | 276.41          |
| 12               | 1689.48               | 7.85             | 19.93         | 1.77            | 12.68            | 54.18          | 346.12            | 32.57           | 38.02           | 77.32            | 346.25         | 354.78          |
| 15               | 1546.57               | 11.61            | 46.55         | 5.17            | 15.48            | 71.62          | 293.79            | 46.95           | 47.49           | 113.99           | 292.37         | 313.80          |
| 18               | 1261.38               | 3.30             | 55.36         | 5.70            | 12.23            | 85.18          | 269.25            | 36.65           | 37.93           | 122.53           | 266.04         | 292.90          |
| 21               | 972.43                | 1.89             | 44.42         | 10.23           | 13.93            | 83.25          | 253.48            | 28.11           | 35.38           | 133.27           | 240.29         | 274.77          |
| 24               | 891.76                | 1.21             | 23.75         | 6.40            | 13.12            | 69.03          | 243.85            | 19.11           | 30.95           | 129.84           | 222.43         | 257.55          |
| 27               | 919.91                | 1.61             | 12.70         | 3.24            | 10.31            | 37.08          | 221.82            | 17.10           | 30.17           | 104.92           | 202.61         | 228.17          |
| 30               | 891.22                | 0.88             | 10.08         | 2.49            | 8.34             | 23.07          | 232.18            | 17.82           | 25.09           | 84.31            | 220.13         | 235.73          |
| 33               | 644.05                | 0.67             | 12.34         | 1.91            | 7.12             | 14.08          | 168.43            | 13.48           | 22.21           | 73.51            | 155.07         | 171.61          |
| 36               | 520.89                | 0.50             | 6.53          | 1.57            | 6.57             | 23.14          | 123.16            | 8.80            | 20.51           | 45.57            | 119.22         | 127.63          |
| 39               | 505.17                | 0.51             | 15.12         | 2.46            | 7.73             | 35.39          | 113.54            | 8.36            | 19.40           | 41.30            | 114.80         | 122.01          |
| 42               | 496.82                | 0.38             | 10.56         | 2.08            | 7.51             | 39.17          | 112.85            | 7.57            | 16.45           | 44.68            | 113.02         | 121.53          |
| 45               | 419.88                | 0.80             | 9.01          | 2.27            | 6.88             | 33.19          | 93.62             | 7.59            | 17.54           | 46.72            | 90.46          | 101.81          |
| 48               | 371.87                | 0.26             | 5.74          | 2.98            | 5.28             | 23.35          | 85.32             | 7.18            | 12.56           | 36.00            | 82.51          | 90.02           |
| 52               | 305.45                | 0.25             | 9.25          | 2.78            | 5.77             | 25.25          | 74.87             | 6.44            | 9.88            | 34.78            | 72.79          | 80.67           |
| 56               | 192.88                | 0.31             | 6.78          | 2.93            | 4.53             | 15.51          | 53.37             | 5.14            | 11.70           | 31.20            | 48.51          | 57.68           |
| 60               | 125.45                | 0.11             | 1.79          | 0.97            | 2.04             | 3.91           | 32.98             | 2.92            | 9.51            | 18.29            | 29.60          | 34.79           |
| 64               | 47.20                 | 0.21             | 1.56          | 2.12            | 2.83             | 7.74           | 24.50             | 2.71            | 9.82            | 20.03            | 19.44          | 27.91           |
| 68               | 17.62                 | 0.09             | 0.87          | 1.01            | 4.36             | 2.68           | 13.73             | 1.25            | 19.34           | 22.52            | 9.21           | 24.33           |

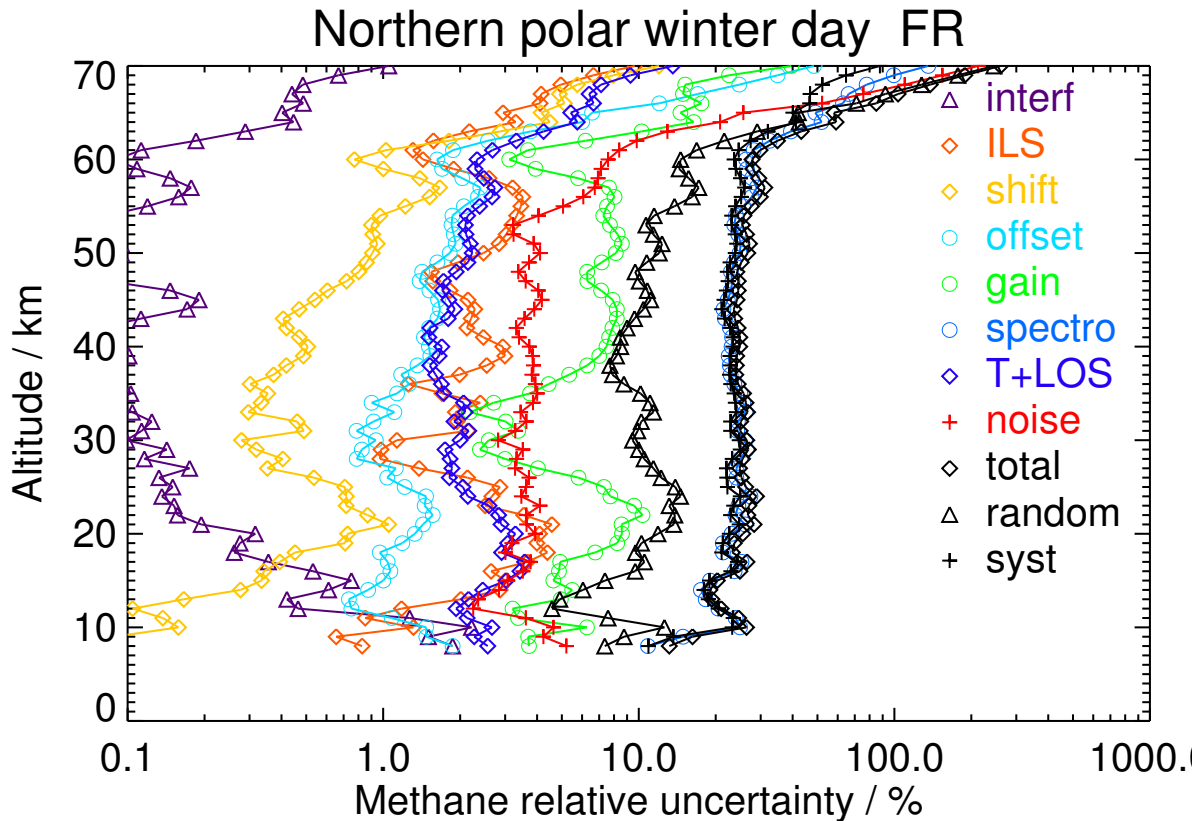**Figure S1.** V8H\_CH4\_61 Northern polar winter day

**Table S2.** Methane error budget for Northern polar winter night. All uncertainties are  $1\sigma$ .

| altitude (km) | mean target (ppbv) | interf (ppbv) | ILS (ppbv) | shift (ppbv) | offset (ppbv) | gain (ppbv) | spectro (ppbv) | T+LOS (ppbv) | noise (ppbv) | random (ppbv) | syst (ppbv) | total (ppbv) |
|---------------|--------------------|---------------|------------|--------------|---------------|-------------|----------------|--------------|--------------|---------------|-------------|--------------|
| 9             | 1720.51            | 30.07         | 8.67       | 1.51         | 22.64         | 55.72       | 284.90         | 34.93        | 66.84        | 151.80        | 261.56      | 302.42       |
| 12            | 1716.84            | 13.54         | 39.45      | 2.95         | 15.56         | 71.48       | 352.73         | 39.15        | 44.31        | 90.96         | 356.00      | 367.44       |
| 15            | 1534.28            | 15.99         | 59.97      | 4.42         | 17.95         | 70.96       | 291.15         | 48.35        | 53.82        | 111.94        | 294.45      | 315.01       |
| 18            | 1227.13            | 4.04          | 55.19      | 5.60         | 13.02         | 68.73       | 277.16         | 42.56        | 41.82        | 122.84        | 270.69      | 297.26       |
| 21            | 886.53             | 3.78          | 39.15      | 6.84         | 12.26         | 55.70       | 229.38         | 25.41        | 38.79        | 124.22        | 210.20      | 244.16       |
| 24            | 827.44             | 1.29          | 29.98      | 5.47         | 9.71          | 34.67       | 228.38         | 17.22        | 34.40        | 111.46        | 208.42      | 236.35       |
| 27            | 775.47             | 2.09          | 9.28       | 2.75         | 8.73          | 24.98       | 222.31         | 14.84        | 31.73        | 133.43        | 183.41      | 226.82       |
| 30            | 735.55             | 0.91          | 10.87      | 1.43         | 7.62          | 11.59       | 218.71         | 13.84        | 26.77        | 110.23        | 192.11      | 221.49       |
| 33            | 563.72             | 0.92          | 8.87       | 1.55         | 6.54          | 16.75       | 147.81         | 10.74        | 21.68        | 63.74         | 137.03      | 151.12       |
| 36            | 457.74             | 0.59          | 8.86       | 1.28         | 5.45          | 21.36       | 110.52         | 6.99         | 17.49        | 37.29         | 108.37      | 114.61       |
| 39            | 377.61             | 0.47          | 12.02      | 1.48         | 4.84          | 21.04       | 86.37          | 5.57         | 14.81        | 31.99         | 85.44       | 91.23        |
| 42            | 376.38             | 0.41          | 7.93       | 1.56         | 3.77          | 16.91       | 88.00          | 4.78         | 13.27        | 32.08         | 85.32       | 91.15        |
| 45            | 367.66             | 0.86          | 12.36      | 1.60         | 5.07          | 23.77       | 79.39          | 5.87         | 15.87        | 42.36         | 74.44       | 85.65        |
| 48            | 331.72             | 0.32          | 5.29       | 2.06         | 2.75          | 12.20       | 75.87          | 4.65         | 9.92         | 33.95         | 70.08       | 77.88        |
| 52            | 257.99             | 0.21          | 5.17       | 1.58         | 3.11          | 10.81       | 61.78          | 4.32         | 9.56         | 25.22         | 58.71       | 63.89        |
| 56            | 200.97             | 0.38          | 4.56       | 3.66         | 5.24          | 19.04       | 52.84          | 5.19         | 12.27        | 33.90         | 47.38       | 58.25        |
| 60            | 173.53             | 0.17          | 1.53       | 1.38         | 2.78          | 5.28        | 41.53          | 4.47         | 12.17        | 18.49         | 39.89       | 43.96        |
| 64            | 117.17             | 0.33          | 1.78       | 2.15         | 3.79          | 10.19       | 40.23          | 4.65         | 14.04        | 22.73         | 38.03       | 44.31        |
| 68            | 77.60              | 0.28          | 2.09       | 1.70         | 6.50          | 10.91       | 33.59          | 4.44         | 28.07        | 35.02         | 29.63       | 45.88        |

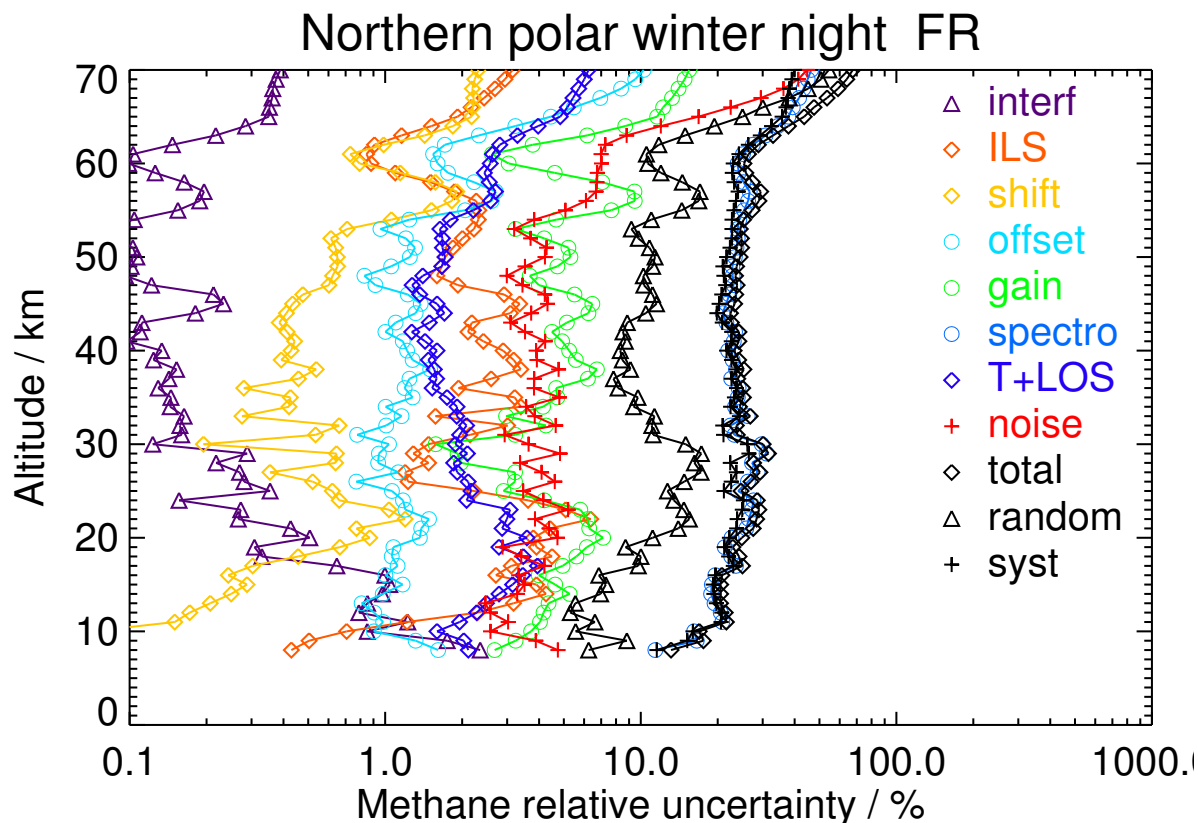

**Figure S2.** V8H\_CH4\_61 Northern polar winter night

**Table S3.** Methane error budget for Northern polar spring day. All uncertainties are  $1\sigma$ .

| altitude<br>(km) | mean target<br>(ppbv) | interf<br>(ppbv) | ILS<br>(ppbv) | shift<br>(ppbv) | offset<br>(ppbv) | gain<br>(ppbv) | spectro<br>(ppbv) | T+LOS<br>(ppbv) | noise<br>(ppbv) | random<br>(ppbv) | syst<br>(ppbv) | total<br>(ppbv) |
|------------------|-----------------------|------------------|---------------|-----------------|------------------|----------------|-------------------|-----------------|-----------------|------------------|----------------|-----------------|
| 9                | 1468.69               | 10.90            | 9.49          | 2.67            | 27.41            | 118.26         | 474.84            | 55.02           | 94.28           | 128.75           | 485.56         | 502.34          |
| 12               | 1707.67               | 4.32             | 23.66         | 1.36            | 12.73            | 110.88         | 298.52            | 35.66           | 39.77           | 74.59            | 315.34         | 324.04          |
| 15               | 1232.09               | 4.67             | 41.17         | 3.69            | 12.36            | 52.75          | 293.29            | 46.06           | 46.20           | 118.05           | 284.61         | 308.12          |
| 18               | 1068.03               | 2.09             | 66.18         | 5.16            | 10.77            | 75.96          | 224.91            | 38.44           | 34.43           | 124.71           | 219.08         | 252.08          |
| 21               | 853.67                | 1.26             | 49.32         | 9.30            | 10.85            | 67.83          | 220.30            | 26.27           | 32.97           | 130.56           | 201.25         | 239.89          |
| 24               | 963.03                | 1.13             | 38.70         | 8.89            | 8.20             | 44.51          | 233.98            | 20.15           | 32.73           | 104.22           | 221.33         | 244.64          |
| 27               | 875.36                | 0.98             | 17.87         | 4.90            | 6.51             | 20.31          | 222.68            | 17.20           | 30.95           | 84.08            | 211.11         | 227.24          |
| 30               | 838.56                | 1.17             | 32.65         | 2.85            | 5.74             | 21.14          | 198.14            | 16.91           | 27.44           | 66.04            | 193.63         | 204.59          |
| 33               | 764.11                | 0.65             | 12.84         | 3.95            | 5.22             | 19.06          | 166.46            | 12.95           | 23.12           | 52.74            | 161.86         | 170.24          |
| 36               | 692.48                | 0.51             | 11.73         | 3.02            | 5.12             | 25.09          | 143.86            | 9.45            | 19.72           | 41.70            | 142.26         | 148.24          |
| 39               | 537.89                | 0.64             | 18.74         | 4.34            | 5.09             | 24.98          | 116.56            | 7.98            | 18.01           | 41.03            | 115.37         | 122.45          |
| 42               | 421.21                | 0.43             | 17.32         | 3.52            | 4.48             | 23.18          | 93.39             | 5.27            | 13.71           | 36.49            | 92.06          | 99.03           |
| 45               | 324.57                | 1.02             | 17.33         | 3.92            | 5.03             | 24.02          | 94.27             | 6.56            | 20.29           | 39.94            | 93.09          | 101.30          |
| 48               | 292.91                | 0.47             | 6.45          | 4.54            | 5.45             | 32.74          | 72.75             | 7.28            | 14.31           | 43.47            | 69.46          | 81.94           |
| 52               | 164.68                | 0.16             | 4.37          | 1.76            | 2.79             | 12.88          | 42.83             | 2.62            | 6.35            | 23.18            | 39.25          | 45.58           |
| 56               | 150.57                | 0.30             | 7.33          | 3.28            | 3.89             | 17.17          | 33.55             | 3.75            | 10.78           | 28.45            | 28.65          | 40.38           |
| 60               | 107.82                | 0.10             | 2.83          | 1.80            | 1.43             | 4.45           | 28.68             | 2.31            | 5.51            | 11.95            | 27.35          | 29.85           |
| 64               | 20.80                 | 0.48             | 3.02          | 5.53            | 4.68             | 18.35          | 35.60             | 4.43            | 10.02           | 18.85            | 37.83          | 42.26           |
| 68               | 43.97                 | 0.09             | 0.45          | 0.47            | 2.35             | 2.14           | 9.69              | 0.81            | 9.90            | 11.46            | 8.47           | 14.25           |

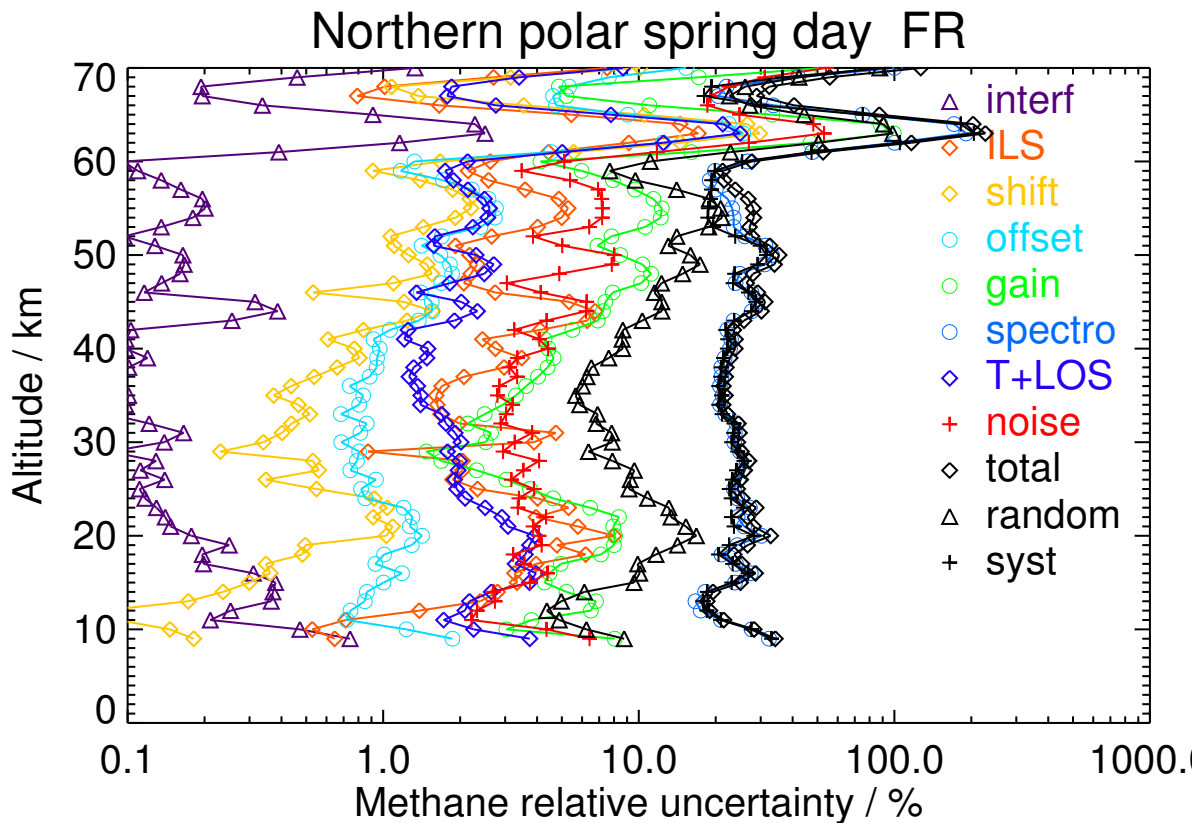**Figure S3.** V8H\_CH4\_61 Northern polar spring day

**Table S4.** Methane error budget for Northern polar spring night. All uncertainties are  $1\sigma$ .

| altitude (km) | mean target (ppbv) | interf (ppbv) | ILS (ppbv) | shift (ppbv) | offset (ppbv) | gain (ppbv) | spectro (ppbv) | T+LOS (ppbv) | noise (ppbv) | random (ppbv) | syst (ppbv) | total (ppbv) |
|---------------|--------------------|---------------|------------|--------------|---------------|-------------|----------------|--------------|--------------|---------------|-------------|--------------|
| 9             | 1482.32            | 13.83         | 3.93       | 2.62         | 25.49         | 109.31      | 405.09         | 45.86        | 86.96        | 217.21        | 373.35      | 431.94       |
| 12            | 1670.88            | 3.78          | 18.98      | 1.57         | 11.57         | 97.14       | 310.12         | 34.08        | 37.75        | 72.96         | 321.53      | 329.70       |
| 15            | 1349.32            | 4.69          | 31.49      | 3.12         | 12.36         | 57.50       | 303.31         | 44.04        | 45.45        | 110.42        | 297.14      | 316.99       |
| 18            | 1126.54            | 1.80          | 41.09      | 4.64         | 11.18         | 72.67       | 223.81         | 32.25        | 34.18        | 104.87        | 220.04      | 243.76       |
| 21            | 872.62             | 1.38          | 47.63      | 12.70        | 9.69          | 50.19       | 236.42         | 23.47        | 30.94        | 133.08        | 211.52      | 249.90       |
| 24            | 1001.51            | 1.03          | 28.33      | 7.38         | 9.18          | 50.46       | 244.86         | 19.23        | 30.90        | 108.36        | 230.28      | 254.50       |
| 27            | 933.61             | 0.85          | 18.81      | 4.84         | 6.94          | 20.67       | 237.51         | 17.36        | 29.01        | 90.75         | 223.99      | 241.67       |
| 30            | 842.72             | 1.01          | 24.39      | 3.35         | 5.44          | 14.82       | 202.15         | 16.39        | 24.88        | 68.45         | 194.74      | 206.42       |
| 33            | 734.69             | 0.61          | 12.26      | 3.75         | 5.06          | 18.81       | 157.07         | 13.03        | 21.39        | 53.43         | 151.61      | 160.75       |
| 36            | 596.17             | 0.55          | 10.39      | 2.84         | 5.14          | 22.95       | 124.78         | 8.97         | 18.70        | 47.57         | 120.02      | 129.11       |
| 39            | 477.95             | 0.68          | 17.88      | 4.42         | 4.77          | 19.20       | 104.15         | 7.27         | 16.55        | 35.15         | 103.30      | 109.11       |
| 42            | 355.17             | 0.28          | 10.76      | 2.60         | 3.79          | 16.94       | 81.63          | 4.19         | 13.38        | 32.49         | 78.92       | 85.35        |
| 45            | 269.70             | 0.86          | 18.08      | 3.61         | 4.71          | 19.09       | 83.98          | 6.15         | 21.52        | 39.05         | 82.20       | 91.00        |
| 48            | 233.75             | 0.40          | 6.35       | 4.26         | 4.77          | 25.97       | 51.53          | 5.79         | 14.11        | 33.79         | 50.02       | 60.36        |
| 52            | 158.71             | 0.13          | 4.07       | 0.87         | 1.93          | 9.19        | 41.48          | 1.97         | 6.22         | 20.22         | 38.21       | 43.23        |
| 56            | 119.84             | 0.39          | 4.61       | 4.34         | 4.16          | 14.69       | 35.83          | 3.87         | 11.71        | 30.09         | 28.36       | 41.35        |
| 60            | 84.69              | 0.07          | 2.07       | 1.07         | 1.05          | 2.91        | 23.75          | 1.71         | 4.82         | 11.33         | 21.84       | 24.61        |
| 64            | 36.18              | 0.38          | 2.57       | 3.86         | 3.67          | 13.03       | 28.11          | 3.40         | 9.25         | 16.87         | 28.42       | 33.05        |
| 68            | 29.59              | 0.09          | 0.45       | 0.49         | 2.57          | 1.93        | 10.24          | 0.89         | 10.95        | 13.38         | 7.57        | 15.37        |

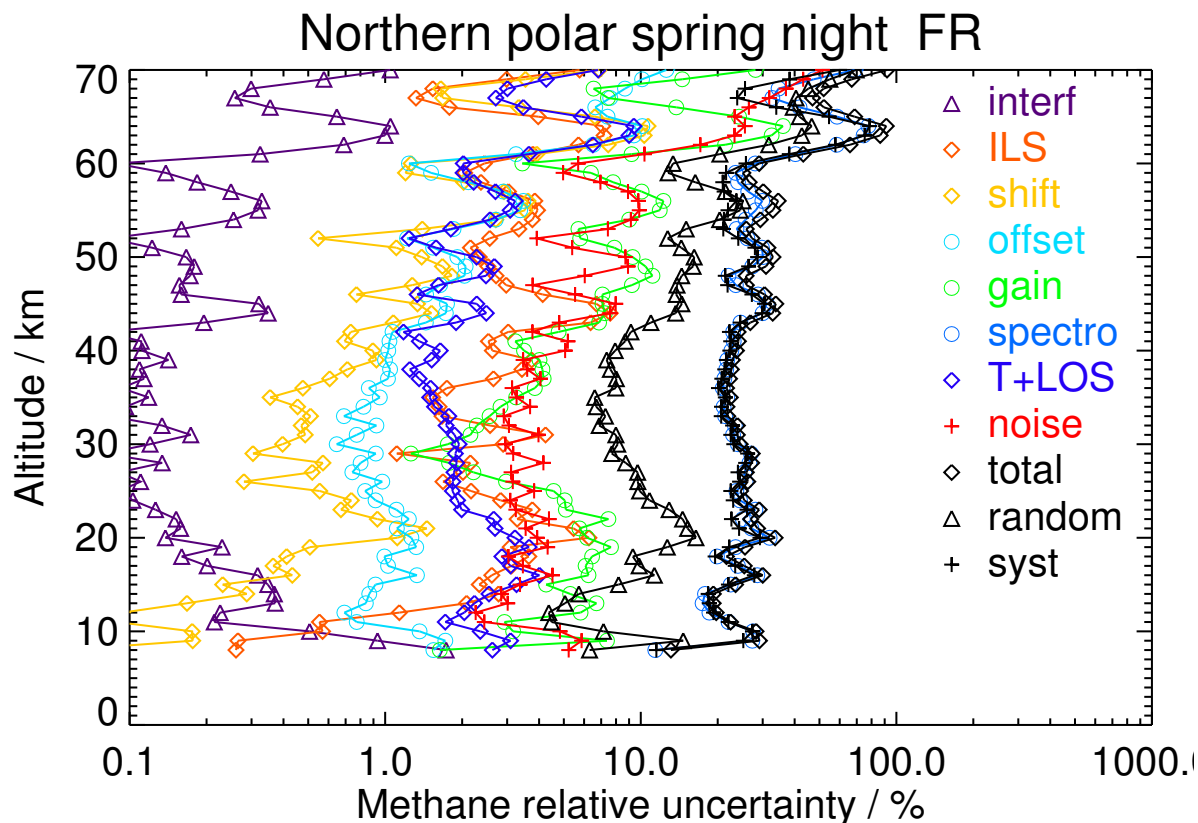

**Figure S4.** V8H\_CH4\_61 Northern polar spring night

**Table S5.** Methane error budget for Northern polar summer day. All uncertainties are  $1\sigma$ .

| altitude (km) | mean target (ppbv) | interf (ppbv) | ILS (ppbv) | shift (ppbv) | offset (ppbv) | gain (ppbv) | spectro (ppbv) | T+LOS (ppbv) | noise (ppbv) | random (ppbv) | syst (ppbv) | total (ppbv) |
|---------------|--------------------|---------------|------------|--------------|---------------|-------------|----------------|--------------|--------------|---------------|-------------|--------------|
| 9             | 1483.67            | 14.03         | 24.48      | 3.85         | 23.27         | 82.69       | 541.35         | 38.94        | 85.51        | 98.94         | 547.98      | 556.84       |
| 12            | 1719.14            | 4.23          | 17.28      | 1.85         | 12.34         | 62.74       | 402.75         | 28.21        | 42.16        | 104.65        | 397.79      | 411.33       |
| 15            | 1818.69            | 6.40          | 84.70      | 5.13         | 15.36         | 145.95      | 301.79         | 43.04        | 43.65        | 100.21        | 337.01      | 351.59       |
| 18            | 1518.70            | 1.63          | 45.50      | 3.05         | 11.08         | 93.13       | 341.80         | 38.13        | 36.91        | 101.06        | 346.85      | 361.28       |
| 21            | 1258.22            | 1.03          | 58.77      | 12.11        | 13.83         | 107.62      | 315.89         | 34.88        | 33.91        | 127.20        | 318.35      | 342.82       |
| 24            | 1160.48            | 0.98          | 26.06      | 4.84         | 10.79         | 66.70       | 285.40         | 23.56        | 32.07        | 83.74         | 285.12      | 297.17       |
| 27            | 1002.18            | 1.26          | 11.57      | 6.48         | 7.80          | 16.09       | 233.99         | 19.09        | 29.82        | 45.92         | 233.22      | 237.70       |
| 30            | 873.58             | 0.79          | 13.58      | 2.33         | 6.47          | 11.15       | 219.36         | 16.02        | 26.34        | 44.14         | 217.89      | 222.32       |
| 33            | 737.27             | 0.98          | 16.32      | 4.28         | 5.96          | 20.39       | 166.55         | 12.56        | 22.27        | 36.32         | 166.77      | 170.68       |
| 36            | 598.15             | 0.67          | 6.01       | 1.46         | 4.96          | 15.44       | 128.63         | 8.75         | 20.11        | 28.53         | 128.51      | 131.64       |
| 39            | 455.02             | 0.64          | 16.31      | 2.91         | 4.20          | 14.05       | 96.15          | 5.71         | 17.69        | 27.66         | 96.51       | 100.40       |
| 42            | 339.52             | 0.43          | 9.87       | 2.37         | 3.18          | 8.12        | 79.84          | 4.83         | 19.01        | 28.00         | 78.45       | 83.30        |
| 45            | 269.52             | 1.15          | 18.83      | 3.88         | 4.02          | 18.68       | 91.68          | 6.56         | 21.40        | 39.97         | 89.69       | 98.19        |
| 48            | 174.22             | 0.39          | 4.18       | 1.56         | 2.84          | 17.10       | 32.90          | 2.60         | 9.08         | 19.71         | 33.22       | 38.63        |
| 52            | 127.05             | 0.28          | 1.86       | 1.29         | 1.92          | 9.50        | 37.12          | 2.11         | 10.22        | 14.94         | 36.91       | 39.83        |
| 56            | 71.47              | 0.33          | 6.75       | 1.89         | 2.42          | 8.60        | 18.39          | 2.45         | 11.48        | 16.49         | 18.25       | 24.60        |
| 60            | 97.51              | 0.09          | 1.51       | 0.95         | 1.31          | 5.64        | 20.37          | 1.21         | 4.24         | 6.97          | 20.55       | 21.70        |
| 64            | 92.40              | 0.36          | 2.11       | 3.98         | 2.92          | 11.39       | 38.99          | 2.70         | 8.31         | 12.55         | 39.98       | 41.90        |
| 68            | 135.47             | 0.18          | 0.94       | 1.80         | 2.52          | 2.80        | 33.99          | 2.09         | 11.20        | 13.78         | 33.37       | 36.11        |

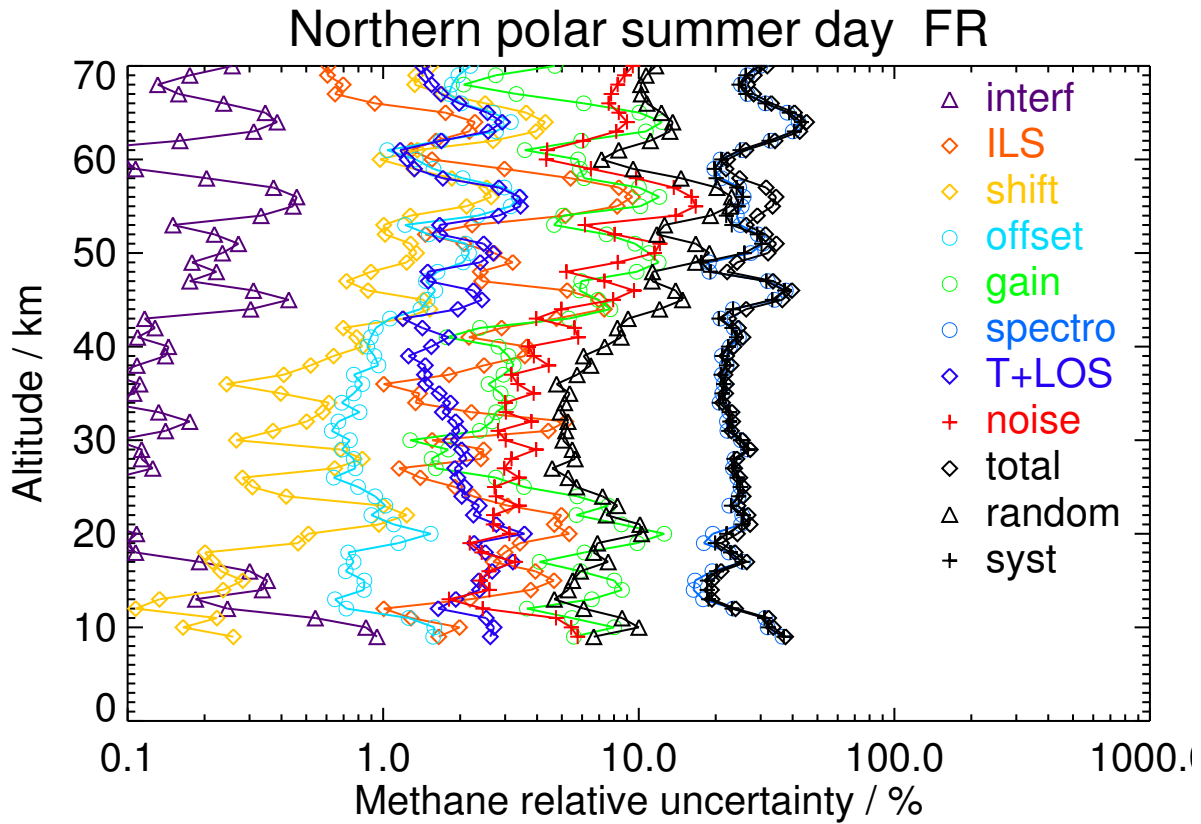

**Figure S5.** V8H\_CH4\_61 Northern polar summer day

**Table S6.** Methane error budget for Northern polar summer night. All uncertainties are  $1\sigma$ .

| altitude<br>(km) | mean target<br>(ppbv) | interf<br>(ppbv) | ILS<br>(ppbv) | shift<br>(ppbv) | offset<br>(ppbv) | gain<br>(ppbv) | spectro<br>(ppbv) | T+LOS<br>(ppbv) | noise<br>(ppbv) | random<br>(ppbv) | syst<br>(ppbv) | total<br>(ppbv) |
|------------------|-----------------------|------------------|---------------|-----------------|------------------|----------------|-------------------|-----------------|-----------------|------------------|----------------|-----------------|
| 12               | 1682.78               | 4.86             | 15.60         | 1.72            | 14.31            | 33.45          | 422.19            | 28.28           | 51.18           | 77.94            | 420.93         | 428.08          |
| 15               | 1829.03               | 6.41             | 72.26         | 3.73            | 14.46            | 125.23         | 296.89            | 37.83           | 42.37           | 95.06            | 321.72         | 335.47          |
| 18               | 1541.31               | 1.77             | 50.88         | 1.64            | 12.88            | 100.68         | 356.97            | 40.28           | 38.68           | 109.52           | 362.56         | 378.74          |
| 21               | 1285.91               | 1.26             | 33.10         | 7.37            | 13.64            | 99.29          | 306.82            | 33.68           | 36.55           | 103.33           | 311.65         | 328.33          |
| 24               | 1138.48               | 1.09             | 28.66         | 5.08            | 9.37             | 42.78          | 287.01            | 21.88           | 33.18           | 66.35            | 286.92         | 294.49          |
| 27               | 1006.12               | 1.35             | 9.72          | 3.89            | 8.13             | 13.34          | 238.65            | 19.22           | 31.37           | 43.72            | 238.22         | 242.20          |
| 30               | 828.93                | 0.85             | 8.69          | 2.16            | 6.96             | 7.88           | 220.94            | 16.35           | 27.83           | 39.02            | 220.28         | 223.71          |
| 33               | 667.11                | 1.14             | 16.86         | 3.45            | 6.28             | 18.02          | 156.54            | 12.20           | 22.98           | 31.18            | 157.70         | 160.75          |
| 36               | 554.33                | 0.72             | 5.93          | 1.58            | 5.19             | 13.52          | 125.08            | 8.49            | 21.03           | 28.97            | 124.77         | 128.09          |
| 39               | 424.77                | 0.45             | 15.66         | 3.05            | 4.51             | 18.00          | 92.99             | 6.01            | 19.28           | 27.46            | 94.34          | 98.25           |
| 42               | 257.77                | 0.47             | 10.70         | 1.95            | 3.67             | 6.57           | 74.57             | 5.77            | 21.11           | 27.22            | 73.98          | 78.83           |
| 45               | 200.07                | 0.61             | 18.78         | 2.31            | 4.11             | 21.89          | 61.16             | 6.17            | 21.68           | 32.30            | 63.72          | 71.44           |
| 48               | 117.27                | 0.16             | 1.09          | 1.08            | 1.23             | 4.45           | 25.29             | 1.32            | 6.60            | 11.88            | 23.81          | 26.61           |
| 52               | 100.21                | 0.20             | 1.16          | 1.16            | 1.88             | 7.71           | 26.06             | 1.56            | 8.58            | 11.92            | 26.05          | 28.65           |
| 56               | 89.06                 | 0.26             | 3.61          | 1.67            | 2.19             | 7.20           | 26.24             | 2.09            | 10.29           | 15.52            | 25.11          | 29.52           |
| 60               | 121.66                | 0.08             | 1.66          | 1.10            | 1.42             | 5.15           | 26.80             | 1.75            | 5.16            | 11.02            | 25.68          | 27.94           |
| 64               | 127.99                | 0.43             | 0.99          | 3.06            | 2.73             | 9.26           | 49.30             | 2.71            | 8.52            | 13.03            | 49.44          | 51.13           |
| 68               | 171.35                | 0.28             | 2.53          | 2.20            | 3.64             | 4.20           | 48.20             | 3.86            | 16.38           | 19.30            | 47.71          | 51.46           |

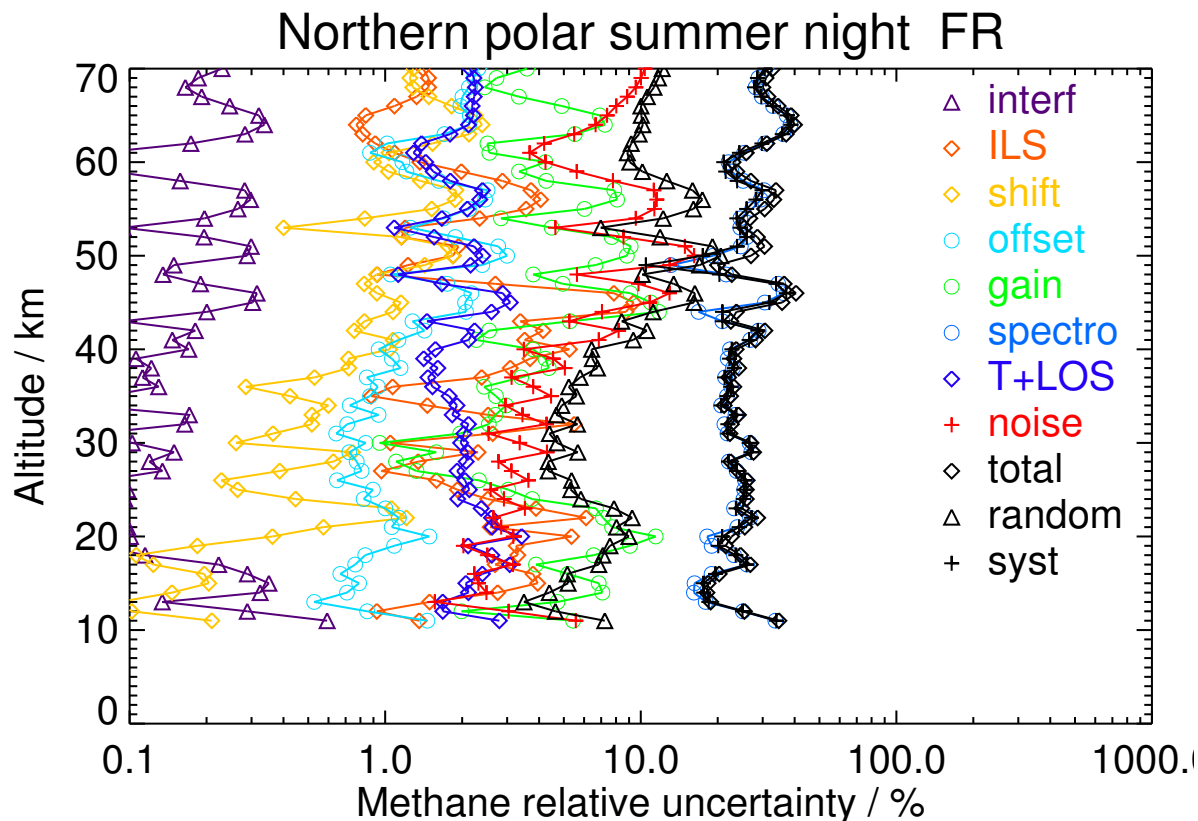

**Figure S6.** V8H\_CH4\_61 Northern polar summer night



**Table S7.** Methane error budget for Northern polar autumn day. All uncertainties are  $1\sigma$ .

| altitude (km) | mean target (ppbv) | interf (ppbv) | ILS (ppbv) | shift (ppbv) | offset (ppbv) | gain (ppbv) | spectro (ppbv) | T+LOS (ppbv) | noise (ppbv) | random (ppbv) | syst (ppbv) | total (ppbv) |
|---------------|--------------------|---------------|------------|--------------|---------------|-------------|----------------|--------------|--------------|---------------|-------------|--------------|
| 9             | 1662.66            | 57.33         | 13.57      | 2.11         | 26.92         | 91.20       | 407.76         | 45.71        | 90.21        | 177.58        | 396.84      | 434.76       |
| 12            | 1736.73            | 23.77         | 24.29      | 2.51         | 14.62         | 78.44       | 388.11         | 31.74        | 49.64        | 113.89        | 385.56      | 402.03       |
| 15            | 1673.94            | 8.13          | 33.88      | 3.28         | 13.06         | 73.95       | 381.37         | 51.20        | 51.44        | 115.69        | 379.72      | 396.96       |
| 18            | 1626.56            | 3.87          | 119.74     | 8.24         | 14.38         | 136.46      | 305.45         | 70.28        | 49.82        | 153.22        | 332.41      | 366.02       |
| 21            | 1383.49            | 3.70          | 59.40      | 6.26         | 17.46         | 118.98      | 254.57         | 44.54        | 47.35        | 96.24         | 278.95      | 295.09       |
| 24            | 1196.60            | 1.40          | 24.34      | 10.64        | 13.99         | 86.79       | 244.64         | 26.28        | 41.29        | 74.30         | 255.26      | 265.86       |
| 27            | 936.08             | 0.99          | 14.24      | 6.28         | 8.92          | 43.77       | 214.37         | 19.24        | 37.25        | 59.78         | 215.35      | 223.49       |
| 30            | 732.59             | 0.99          | 8.44       | 2.60         | 7.30          | 20.62       | 178.73         | 17.04        | 33.15        | 53.41         | 176.17      | 184.09       |
| 33            | 522.52             | 0.41          | 7.80       | 1.76         | 6.11          | 12.20       | 130.47         | 13.04        | 27.42        | 44.18         | 127.45      | 134.89       |
| 36            | 326.79             | 0.27          | 6.65       | 1.90         | 4.83          | 8.39        | 82.83          | 7.46         | 22.75        | 38.20         | 78.21       | 87.04        |
| 39            | 186.78             | 0.29          | 6.28       | 1.25         | 3.47          | 9.44        | 49.94          | 4.33         | 17.96        | 34.66         | 42.14       | 54.56        |
| 42            | 100.96             | 0.25          | 4.42       | 1.21         | 2.71          | 8.04        | 38.74          | 3.04         | 14.70        | 33.29         | 26.66       | 42.65        |
| 45            | 142.18             | 0.23          | 4.58       | 0.77         | 3.13          | 12.07       | 35.45          | 3.68         | 10.53        | 25.63         | 30.01       | 39.47        |
| 48            | 190.65             | 0.15          | 4.34       | 1.58         | 3.35          | 13.77       | 49.87          | 3.39         | 9.24         | 25.46         | 46.45       | 52.97        |
| 52            | 209.34             | 0.19          | 5.88       | 1.14         | 3.17          | 11.05       | 50.13          | 2.90         | 10.46        | 19.47         | 49.19       | 52.91        |
| 56            | 160.68             | 0.18          | 5.57       | 1.75         | 2.54          | 6.94        | 40.97          | 2.78         | 7.99         | 19.66         | 38.11       | 42.88        |
| 60            | 118.92             | 0.10          | 1.53       | 0.82         | 2.01          | 3.57        | 29.64          | 2.00         | 8.02         | 15.64         | 26.87       | 31.09        |
| 64            | 65.27              | 0.17          | 1.35       | 1.18         | 2.01          | 4.79        | 24.85          | 2.02         | 7.00         | 16.16         | 20.97       | 26.47        |
| 68            | 40.62              | 0.11          | 0.80       | 0.74         | 4.10          | 4.04        | 17.17          | 1.36         | 17.42        | 21.40         | 13.27       | 25.19        |

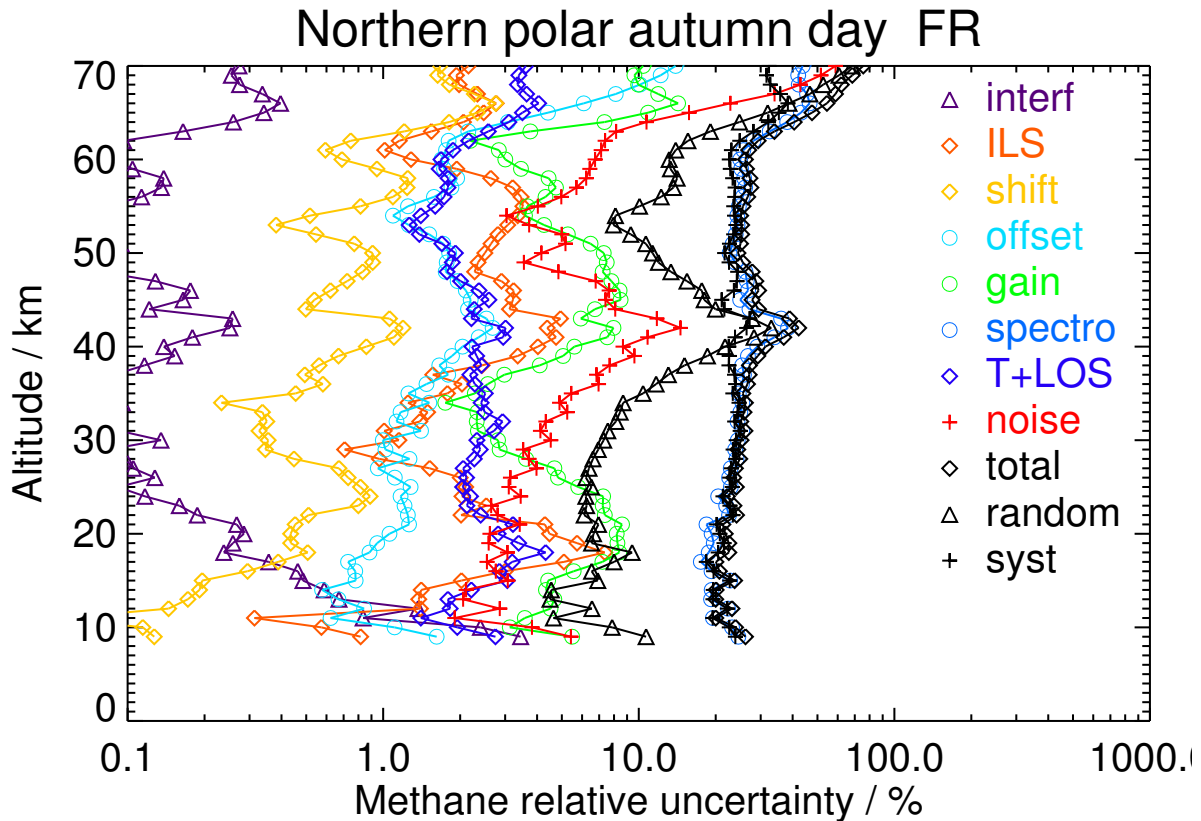

**Figure S7.** V8H\_CH4\_61 Northern polar autumn day



**Table S8.** Methane error budget for Northern polar autumn night. All uncertainties are  $1\sigma$ .

| altitude (km) | mean target (ppbv) | interf (ppbv) | ILS (ppbv) | shift (ppbv) | offset (ppbv) | gain (ppbv) | spectro (ppbv) | T+LOS (ppbv) | noise (ppbv) | random (ppbv) | syst (ppbv) | total (ppbv) |
|---------------|--------------------|---------------|------------|--------------|---------------|-------------|----------------|--------------|--------------|---------------|-------------|--------------|
| 9             | 1679.29            | 68.89         | 14.11      | 2.30         | 27.52         | 95.18       | 438.83         | 47.60        | 94.50        | 165.86        | 437.07      | 467.48       |
| 12            | 1743.25            | 25.91         | 19.65      | 2.59         | 13.25         | 76.16       | 369.45         | 30.44        | 44.53        | 102.78        | 368.61      | 382.67       |
| 15            | 1531.94            | 8.06          | 33.55      | 3.37         | 12.69         | 56.16       | 353.46         | 50.62        | 50.86        | 108.90        | 350.34      | 366.88       |
| 18            | 1532.97            | 3.84          | 96.97      | 7.68         | 13.11         | 120.23      | 287.55         | 69.41        | 50.58        | 142.43        | 306.39      | 337.88       |
| 21            | 1401.98            | 4.45          | 61.79      | 6.26         | 17.95         | 120.05      | 274.43         | 43.57        | 45.33        | 99.37         | 296.65      | 312.85       |
| 24            | 1139.51            | 1.82          | 28.22      | 11.80        | 12.98         | 79.06       | 259.34         | 25.57        | 39.88        | 72.92         | 267.47      | 277.23       |
| 27            | 857.27             | 1.31          | 13.91      | 5.98         | 8.09          | 36.98       | 207.27         | 18.83        | 35.67        | 57.09         | 207.34      | 215.06       |
| 30            | 696.77             | 0.90          | 12.54      | 2.34         | 6.51          | 20.66       | 169.27         | 17.22        | 32.01        | 56.52         | 165.57      | 174.95       |
| 33            | 493.40             | 0.41          | 7.53       | 1.37         | 5.38          | 9.29        | 126.34         | 13.27        | 26.41        | 43.23         | 123.05      | 130.42       |
| 36            | 302.98             | 0.28          | 6.39       | 2.13         | 4.57          | 10.28       | 82.55          | 7.21         | 21.93        | 42.00         | 75.87       | 86.72        |
| 39            | 194.72             | 0.32          | 8.24       | 1.34         | 3.59          | 13.21       | 56.93          | 4.44         | 17.34        | 38.92         | 48.00       | 61.80        |
| 42            | 127.32             | 0.22          | 3.79       | 1.13         | 2.65          | 8.51        | 40.61          | 3.37         | 14.26        | 31.01         | 31.58       | 44.26        |
| 45            | 143.14             | 0.21          | 4.00       | 0.66         | 3.02          | 13.24       | 34.16          | 3.83         | 10.18        | 22.77         | 31.10       | 38.55        |
| 48            | 174.11             | 0.16          | 2.60       | 1.19         | 2.64          | 10.50       | 41.93          | 2.97         | 8.48         | 17.82         | 40.58       | 44.32        |
| 52            | 187.81             | 0.19          | 3.74       | 1.10         | 2.64          | 6.83        | 47.46          | 2.35         | 10.54        | 17.35         | 46.23       | 49.38        |
| 56            | 167.70             | 0.25          | 4.77       | 1.80         | 3.35          | 9.82        | 40.49          | 3.06         | 8.78         | 21.61         | 37.31       | 43.12        |
| 60            | 117.75             | 0.16          | 1.60       | 1.12         | 2.50          | 5.49        | 31.12          | 2.30         | 8.60         | 18.68         | 27.18       | 32.98        |
| 64            | 70.85              | 0.20          | 0.61       | 1.38         | 2.11          | 5.41        | 28.28          | 2.36         | 6.72         | 18.26         | 23.51       | 29.77        |
| 68            | 45.29              | 0.15          | 0.75       | 1.03         | 4.38          | 5.28        | 19.98          | 1.87         | 18.28        | 22.43         | 16.81       | 28.03        |

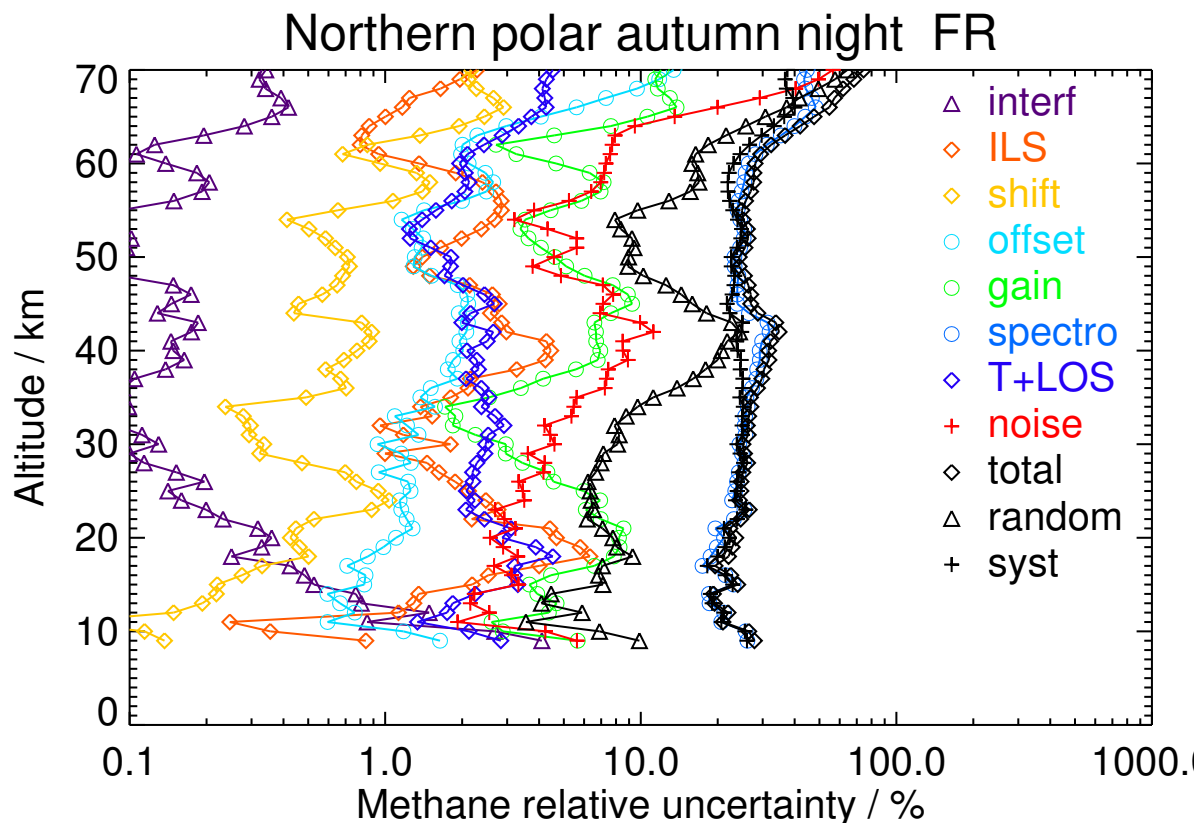

**Figure S8.** V8H\_CH4\_61 Northern polar autumn night

**Table S9.** Methane error budget for Northern midlatitude winter day. All uncertainties are  $1\sigma$ .

| altitude (km) | mean target (ppbv) | interf (ppbv) | ILS (ppbv) | shift (ppbv) | offset (ppbv) | gain (ppbv) | spectro (ppbv) | T+LOS (ppbv) | noise (ppbv) | random (ppbv) | syst (ppbv) | total (ppbv) |
|---------------|--------------------|---------------|------------|--------------|---------------|-------------|----------------|--------------|--------------|---------------|-------------|--------------|
| 9             | 1791.17            | 22.02         | 2.59       | 0.52         | 23.52         | 45.04       | 228.08         | 38.90        | 71.66        | 116.24        | 219.62      | 248.48       |
| 12            | 1659.79            | 3.59          | 13.79      | 1.24         | 12.67         | 38.47       | 364.28         | 29.18        | 39.39        | 78.92         | 361.55      | 370.07       |
| 15            | 1578.68            | 5.37          | 51.59      | 6.03         | 14.36         | 63.91       | 313.87         | 41.12        | 44.87        | 102.38        | 314.25      | 330.51       |
| 18            | 1455.82            | 1.76          | 61.05      | 4.45         | 13.02         | 82.95       | 321.18         | 36.29        | 35.82        | 125.38        | 317.55      | 341.41       |
| 21            | 1269.47            | 1.46          | 51.80      | 11.24        | 15.07         | 88.68       | 322.32         | 29.09        | 33.21        | 121.13        | 319.48      | 341.68       |
| 24            | 1211.90            | 1.08          | 36.98      | 9.86         | 13.69         | 65.60       | 308.09         | 23.31        | 31.59        | 94.58         | 305.74      | 320.03       |
| 27            | 1094.83            | 1.13          | 14.91      | 2.69         | 11.04         | 29.45       | 255.79         | 20.81        | 31.13        | 76.13         | 249.51      | 260.87       |
| 30            | 1042.70            | 0.69          | 10.75      | 2.32         | 8.98          | 17.80       | 272.17         | 20.72        | 26.48        | 84.32         | 261.94      | 275.18       |
| 33            | 711.01             | 0.83          | 8.68       | 2.94         | 7.78          | 18.55       | 180.21         | 15.58        | 22.77        | 67.43         | 170.82      | 183.65       |
| 36            | 564.51             | 0.52          | 7.40       | 2.09         | 6.28          | 21.97       | 129.48         | 9.32         | 19.72        | 44.56         | 125.85      | 133.50       |
| 39            | 421.01             | 0.37          | 13.20      | 2.10         | 5.33          | 18.96       | 92.06          | 6.53         | 17.26        | 33.38         | 90.93       | 96.86        |
| 42            | 475.77             | 0.32          | 9.37       | 1.87         | 5.66          | 28.10       | 107.47         | 5.76         | 14.06        | 39.51         | 105.51      | 112.67       |
| 45            | 475.92             | 0.89          | 13.55      | 2.84         | 6.77          | 33.97       | 110.21         | 7.82         | 16.75        | 47.08         | 108.00      | 117.82       |
| 48            | 426.38             | 0.30          | 6.38       | 4.39         | 5.74          | 29.10       | 97.38          | 7.84         | 11.21        | 43.60         | 93.32       | 103.01       |
| 52            | 310.88             | 0.21          | 8.94       | 2.69         | 4.39          | 17.15       | 70.11          | 5.61         | 8.61         | 28.87         | 67.74       | 73.63        |
| 56            | 170.70             | 0.41          | 6.24       | 5.22         | 5.68          | 21.84       | 60.18          | 6.77         | 12.52        | 37.18         | 54.94       | 66.33        |
| 60            | 182.11             | 0.10          | 2.12       | 1.39         | 1.78          | 3.69        | 39.29          | 3.79         | 8.46         | 15.74         | 37.48       | 40.65        |
| 64            | 64.45              | 0.36          | 2.52       | 3.42         | 4.85          | 16.34       | 41.27          | 4.65         | 12.16        | 28.41         | 37.07       | 46.71        |
| 68            | 49.23              | 0.16          | 1.52       | 1.41         | 4.72          | 8.05        | 24.87          | 2.45         | 20.30        | 27.35         | 19.49       | 33.59        |

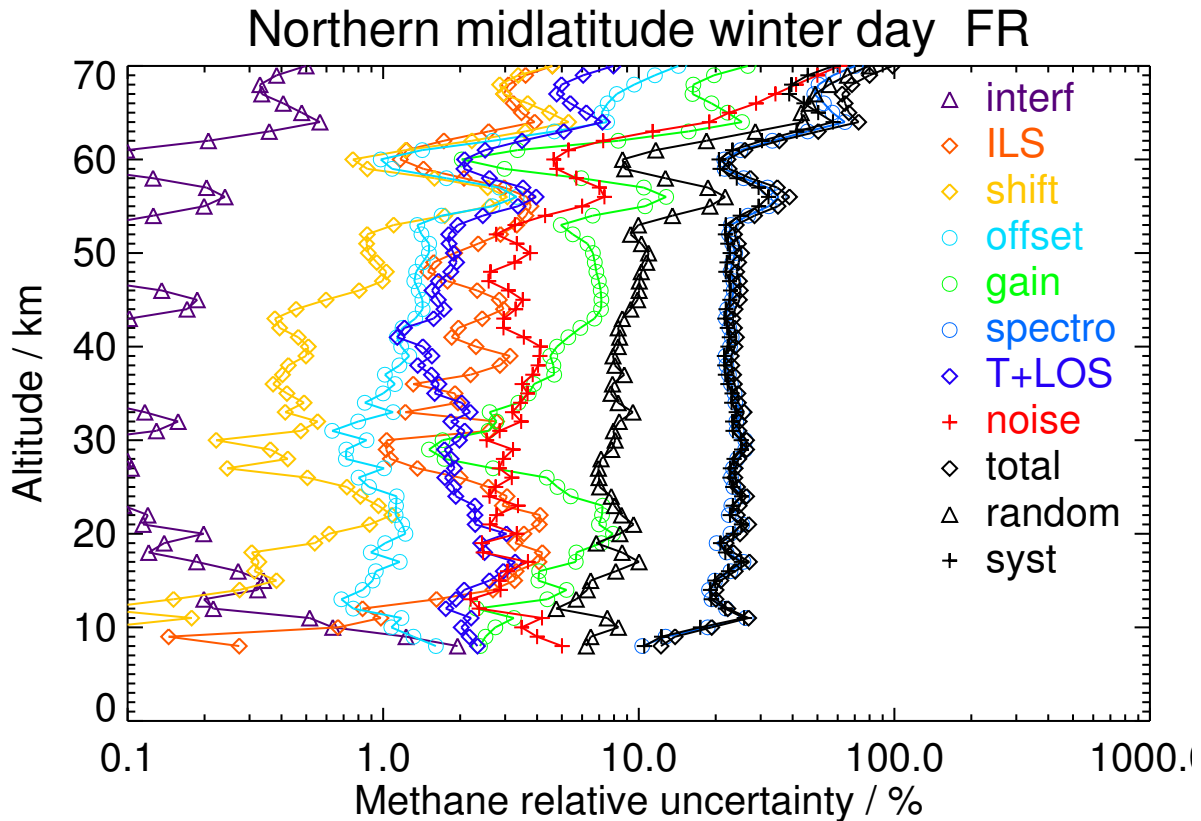

**Figure S9.** V8H\_CH4\_61 Northern midlatitude winter day

**Table S10.** Methane error budget for Northern midlatitude winter night. All uncertainties are  $1\sigma$ .

| altitude (km) | mean target (ppbv) | interf (ppbv) | ILS (ppbv) | shift (ppbv) | offset (ppbv) | gain (ppbv) | spectro (ppbv) | T+LOS (ppbv) | noise (ppbv) | random (ppbv) | syst (ppbv) | total (ppbv) |
|---------------|--------------------|---------------|------------|--------------|---------------|-------------|----------------|--------------|--------------|---------------|-------------|--------------|
| 9             | 1718.86            | 24.53         | 5.91       | 1.26         | 24.43         | 50.44       | 290.17         | 38.75        | 79.18        | 156.79        | 266.77      | 309.44       |
| 12            | 1633.11            | 4.85          | 19.65      | 1.47         | 12.70         | 49.36       | 377.12         | 28.30        | 43.66        | 117.53        | 366.23      | 384.63       |
| 15            | 1522.66            | 5.34          | 49.26      | 6.02         | 14.10         | 70.35       | 311.68         | 36.94        | 45.17        | 127.53        | 303.19      | 328.92       |
| 18            | 1358.87            | 2.07          | 43.61      | 4.43         | 12.51         | 61.51       | 363.01         | 41.80        | 40.61        | 157.76        | 340.81      | 375.55       |
| 21            | 1249.45            | 2.28          | 37.54      | 6.20         | 11.52         | 65.01       | 323.61         | 30.79        | 36.64        | 113.07        | 316.29      | 335.90       |
| 24            | 1249.32            | 0.99          | 37.18      | 8.40         | 12.75         | 77.44       | 312.47         | 24.18        | 33.49        | 102.81        | 310.46      | 327.04       |
| 27            | 1216.92            | 0.98          | 22.89      | 2.10         | 10.13         | 48.11       | 279.81         | 18.57        | 31.20        | 76.47         | 276.97      | 287.33       |
| 30            | 1141.06            | 0.91          | 9.81       | 2.30         | 8.49          | 19.22       | 290.37         | 19.12        | 29.10        | 74.15         | 283.85      | 293.38       |
| 33            | 884.86             | 1.01          | 14.62      | 4.04         | 7.60          | 22.03       | 206.54         | 15.14        | 24.86        | 61.08         | 201.37      | 210.43       |
| 36            | 586.62             | 0.44          | 9.57       | 1.58         | 6.09          | 19.45       | 137.71         | 9.45         | 20.22        | 44.33         | 134.19      | 141.32       |
| 39            | 425.13             | 0.37          | 12.41      | 2.29         | 5.14          | 17.58       | 97.71          | 6.03         | 16.90        | 36.73         | 94.95       | 101.80       |
| 42            | 410.47             | 0.37          | 8.20       | 1.96         | 5.36          | 25.61       | 102.12         | 5.00         | 14.70        | 35.73         | 100.74      | 106.89       |
| 45            | 407.01             | 0.74          | 13.48      | 1.84         | 4.82          | 22.65       | 95.30          | 6.60         | 16.37        | 30.07         | 95.98       | 100.58       |
| 48            | 348.41             | 0.22          | 4.70       | 2.67         | 3.78          | 18.20       | 80.06          | 5.11         | 9.03         | 28.14         | 78.11       | 83.02        |
| 52            | 271.01             | 0.18          | 7.75       | 1.44         | 3.59          | 14.58       | 64.02          | 4.15         | 7.75         | 23.24         | 62.64       | 66.81        |
| 56            | 215.53             | 0.41          | 4.49       | 4.20         | 5.16          | 16.86       | 58.09          | 5.54         | 12.92        | 26.56         | 56.71       | 62.62        |
| 60            | 187.36             | 0.15          | 2.17       | 1.29         | 2.35          | 4.02        | 45.59          | 4.21         | 10.36        | 16.83         | 44.13       | 47.24        |
| 64            | 129.51             | 0.25          | 2.34       | 2.07         | 3.29          | 8.31        | 39.03          | 4.02         | 11.78        | 18.37         | 37.82       | 42.05        |
| 68            | 82.48              | 0.15          | 1.72       | 1.56         | 5.18          | 6.41        | 27.98          | 3.30         | 23.05        | 27.88         | 24.92       | 37.39        |

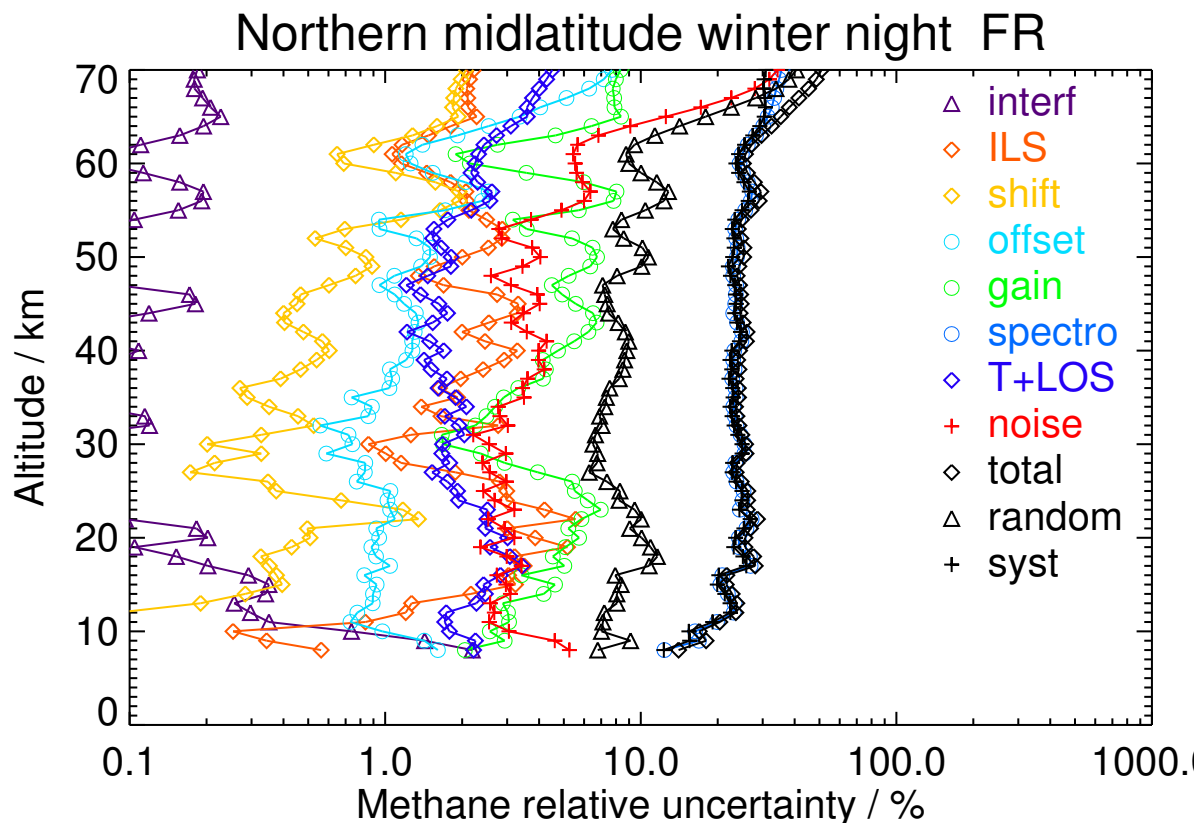

**Figure S10.** V8H\_CH4\_61 Northern midlatitude winter night

**Table S11.** Methane error budget for Northern midlatitude spring day. All uncertainties are  $1\sigma$ .

| altitude (km) | mean target (ppbv) | interf (ppbv) | ILS (ppbv) | shift (ppbv) | offset (ppbv) | gain (ppbv) | spectro (ppbv) | T+LOS (ppbv) | noise (ppbv) | random (ppbv) | syst (ppbv) | total (ppbv) |
|---------------|--------------------|---------------|------------|--------------|---------------|-------------|----------------|--------------|--------------|---------------|-------------|--------------|
| 9             | 1441.39            | 12.80         | 17.28      | 2.31         | 29.00         | 122.43      | 412.24         | 50.10        | 96.57        | 137.53        | 423.28      | 445.06       |
| 12            | 1746.35            | 4.05          | 26.69      | 1.35         | 12.55         | 97.81       | 333.35         | 34.28        | 39.07        | 80.53         | 343.21      | 352.53       |
| 15            | 1572.31            | 4.23          | 42.12      | 3.24         | 13.12         | 55.65       | 351.20         | 47.24        | 46.80        | 105.71        | 348.80      | 364.47       |
| 18            | 1573.78            | 2.40          | 101.25     | 6.28         | 18.83         | 145.42      | 298.94         | 54.37        | 38.61        | 137.09        | 326.83      | 354.41       |
| 21            | 1209.87            | 2.10          | 46.76      | 12.82        | 16.18         | 97.86       | 267.54         | 31.54        | 35.83        | 125.70        | 265.05      | 293.35       |
| 24            | 1152.54            | 1.20          | 30.56      | 7.33         | 10.71         | 52.76       | 272.12         | 24.28        | 34.43        | 99.91         | 264.06      | 282.33       |
| 27            | 1030.76            | 1.12          | 15.55      | 5.45         | 8.04          | 17.37       | 248.32         | 20.27        | 32.69        | 70.61         | 242.48      | 252.55       |
| 30            | 907.29             | 1.44          | 31.81      | 3.47         | 6.51          | 21.01       | 226.52         | 19.57        | 29.55        | 60.98         | 224.41      | 232.55       |
| 33            | 814.31             | 0.89          | 19.28      | 4.88         | 6.10          | 22.90       | 174.33         | 14.80        | 25.06        | 46.35         | 173.34      | 179.43       |
| 36            | 695.15             | 0.67          | 6.98       | 3.27         | 5.35          | 21.42       | 143.72         | 10.05        | 21.61        | 44.84         | 140.57      | 147.55       |
| 39            | 568.41             | 0.63          | 10.30      | 4.72         | 5.08          | 15.72       | 122.49         | 8.02         | 19.77        | 42.39         | 118.59      | 125.94       |
| 42            | 476.90             | 0.36          | 16.72      | 2.65         | 5.09          | 25.19       | 107.59         | 6.07         | 13.51        | 40.28         | 105.44      | 112.88       |
| 45            | 432.53             | 0.77          | 19.14      | 2.07         | 6.42          | 36.80       | 120.94         | 6.77         | 16.65        | 46.09         | 120.80      | 129.29       |
| 48            | 391.98             | 0.43          | 13.73      | 5.21         | 6.82          | 43.08       | 100.28         | 9.37         | 15.91        | 54.48         | 97.71       | 111.87       |
| 52            | 229.98             | 0.19          | 6.60       | 2.45         | 3.18          | 13.68       | 53.10          | 4.13         | 8.67         | 28.28         | 48.57       | 56.21        |
| 56            | 176.19             | 0.30          | 7.44       | 3.39         | 3.36          | 14.41       | 39.15          | 4.13         | 10.90        | 27.74         | 34.42       | 44.21        |
| 60            | 105.45             | 0.17          | 2.86       | 3.43         | 2.76          | 9.49        | 34.85          | 3.54         | 7.49         | 16.61         | 33.54       | 37.43        |
| 64            | 37.72              | 0.31          | 1.94       | 4.54         | 4.48          | 18.26       | 30.65          | 3.95         | 8.12         | 18.20         | 32.68       | 37.41        |
| 68            | 46.81              | 0.13          | 0.90       | 0.94         | 2.45          | 4.83        | 14.33          | 1.33         | 10.04        | 13.28         | 12.75       | 18.41        |

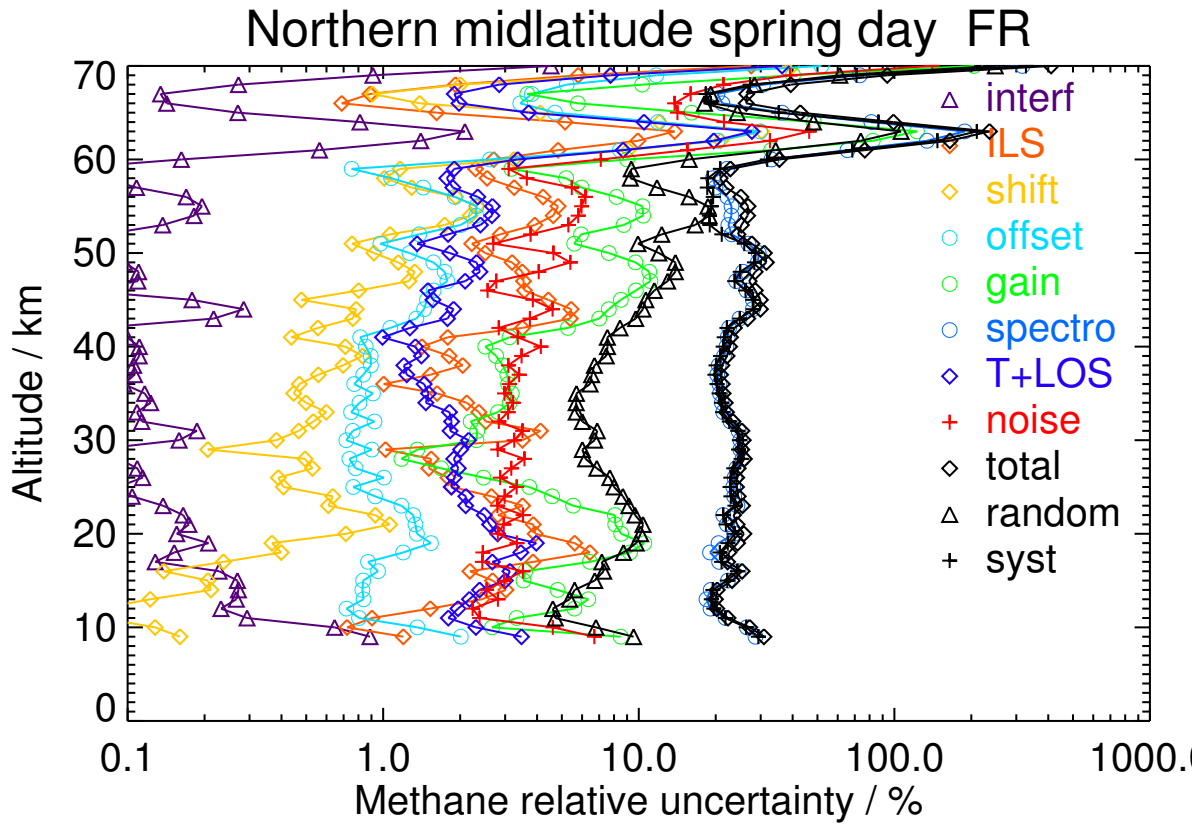

**Figure S11.** V8H\_CH4\_61 Northern midlatitude spring day

**Table S12.** Methane error budget for Northern midlatitude spring night. All uncertainties are  $1\sigma$ .

| altitude (km) | mean target (ppbv) | interf (ppbv) | ILS (ppbv) | shift (ppbv) | offset (ppbv) | gain (ppbv) | spectro (ppbv) | T+LOS (ppbv) | noise (ppbv) | random (ppbv) | syst (ppbv) | total (ppbv) |
|---------------|--------------------|---------------|------------|--------------|---------------|-------------|----------------|--------------|--------------|---------------|-------------|--------------|
| 9             | 1570.98            | 13.29         | 12.27      | 3.39         | 27.30         | 67.74       | 513.48         | 50.86        | 94.51        | 112.08        | 517.96      | 529.95       |
| 12            | 1735.09            | 2.98          | 22.42      | 1.36         | 11.19         | 98.06       | 303.41         | 31.97        | 33.65        | 72.30         | 315.02      | 323.21       |
| 15            | 1591.03            | 4.72          | 50.72      | 3.18         | 13.14         | 75.39       | 321.82         | 45.76        | 44.93        | 108.38        | 323.10      | 340.79       |
| 18            | 1424.55            | 1.96          | 57.75      | 6.18         | 12.82         | 97.64       | 274.40         | 35.49        | 32.94        | 117.35        | 277.39      | 301.19       |
| 21            | 1146.16            | 2.07          | 60.31      | 13.57        | 14.58         | 85.53       | 282.40         | 28.58        | 33.05        | 136.19        | 272.89      | 304.99       |
| 24            | 1172.14            | 1.38          | 28.59      | 4.23         | 9.57          | 36.51       | 277.06         | 21.57        | 31.24        | 80.27         | 272.07      | 283.67       |
| 27            | 1121.05            | 1.29          | 15.17      | 7.38         | 8.06          | 16.27       | 272.04         | 20.80        | 30.27        | 51.92         | 270.69      | 275.63       |
| 30            | 1011.45            | 1.21          | 28.16      | 3.98         | 6.11          | 20.25       | 239.40         | 19.48        | 25.78        | 49.47         | 239.10      | 244.16       |
| 33            | 884.23             | 0.84          | 15.16      | 4.77         | 5.97          | 19.75       | 192.65         | 15.52        | 23.09        | 50.96         | 189.65      | 196.38       |
| 36            | 725.01             | 0.47          | 6.71       | 3.14         | 5.61          | 23.72       | 148.00         | 10.13        | 20.36        | 39.08         | 146.78      | 151.89       |
| 39            | 579.45             | 0.58          | 15.36      | 4.68         | 4.85          | 16.29       | 127.71         | 8.18         | 18.44        | 34.48         | 126.79      | 131.39       |
| 42            | 474.28             | 0.30          | 14.50      | 3.06         | 5.04          | 25.95       | 108.33         | 5.29         | 12.75        | 32.68         | 108.52      | 113.33       |
| 45            | 399.72             | 1.01          | 17.68      | 2.48         | 5.44          | 27.15       | 96.99          | 6.37         | 17.52        | 33.99         | 98.41       | 104.12       |
| 48            | 340.30             | 0.36          | 5.04       | 5.12         | 4.59          | 27.45       | 74.42          | 6.73         | 13.23        | 29.97         | 75.41       | 81.15        |
| 52            | 238.20             | 0.15          | 6.57       | 1.62         | 2.68          | 11.02       | 54.02          | 3.34         | 7.01         | 19.70         | 52.58       | 56.15        |
| 56            | 191.56             | 0.45          | 6.75       | 4.93         | 4.34          | 17.21       | 49.54          | 4.93         | 11.21        | 31.03         | 45.02       | 54.68        |
| 60            | 138.28             | 0.14          | 2.43       | 2.66         | 1.95          | 6.14        | 39.62          | 3.11         | 6.05         | 16.77         | 37.27       | 40.87        |
| 64            | 67.38              | 0.33          | 1.59       | 4.21         | 4.40          | 17.42       | 35.18          | 4.26         | 8.60         | 18.55         | 36.45       | 40.90        |
| 68            | 49.47              | 0.13          | 1.21       | 0.91         | 2.88          | 4.85        | 17.59          | 1.78         | 11.97        | 16.06         | 15.24       | 22.14        |

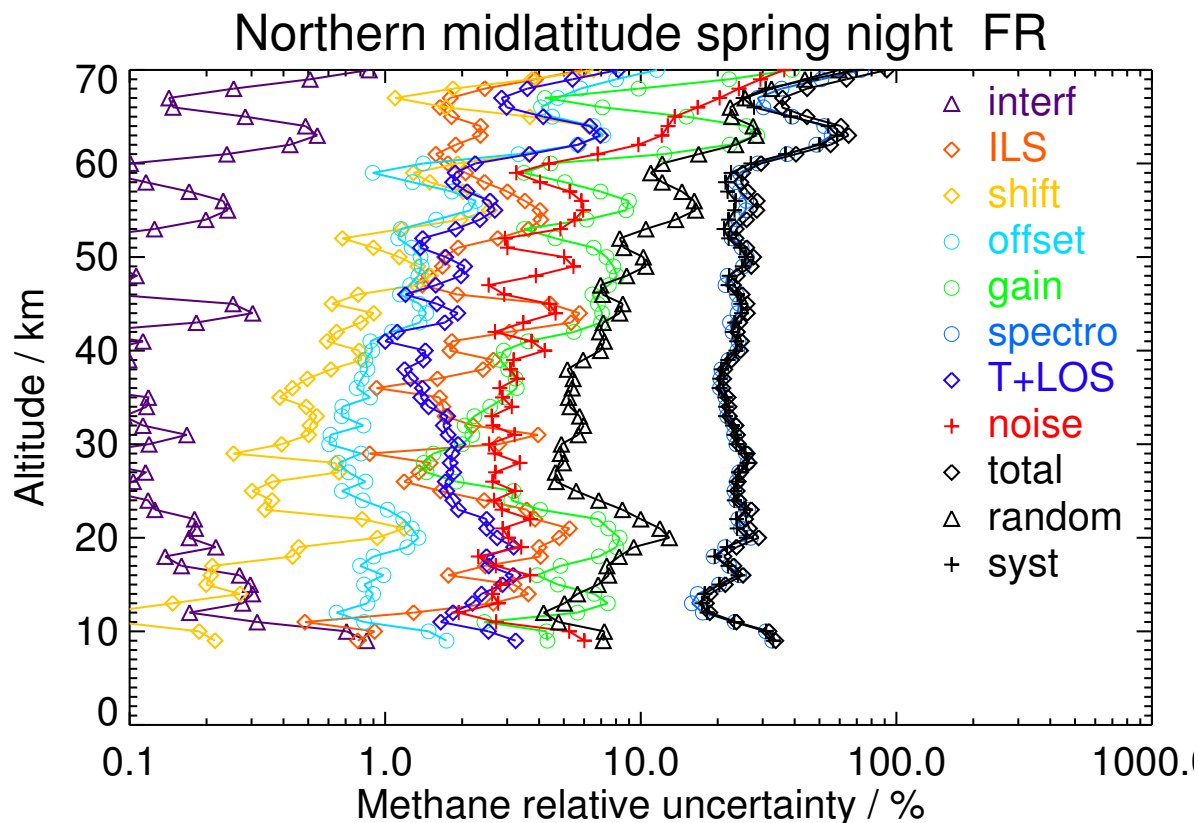

**Figure S12.** V8H\_CH4\_61 Northern midlatitude spring night

**Table S13.** Methane error budget for Northern midlatitude summer day. All uncertainties are  $1\sigma$ .

| altitude<br>(km) | mean target<br>(ppbv) | interf<br>(ppbv) | ILS<br>(ppbv) | shift<br>(ppbv) | offset<br>(ppbv) | gain<br>(ppbv) | spectro<br>(ppbv) | T+LOS<br>(ppbv) | noise<br>(ppbv) | random<br>(ppbv) | syst<br>(ppbv) | total<br>(ppbv) |
|------------------|-----------------------|------------------|---------------|-----------------|------------------|----------------|-------------------|-----------------|-----------------|------------------|----------------|-----------------|
| 12               | 1773.55               | 5.43             | 31.62         | 1.34            | 14.27            | 70.88          | 405.90            | 34.42           | 43.00           | 86.48            | 408.13         | 417.19          |
| 15               | 1871.56               | 6.35             | 109.60        | 4.59            | 19.17            | 111.79         | 364.53            | 53.69           | 52.82           | 119.14           | 386.39         | 404.34          |
| 18               | 1677.58               | 2.63             | 30.85         | 3.96            | 13.65            | 76.17          | 368.34            | 38.84           | 41.52           | 94.60            | 370.03         | 381.93          |
| 21               | 1257.18               | 2.14             | 71.22         | 8.62            | 13.60            | 45.23          | 329.16            | 33.18           | 36.47           | 83.62            | 333.42         | 343.75          |
| 24               | 1143.28               | 1.56             | 38.72         | 4.02            | 11.08            | 21.17          | 284.76            | 23.34           | 31.95           | 52.65            | 286.30         | 291.10          |
| 27               | 1076.34               | 1.42             | 5.76          | 6.13            | 9.53             | 12.01          | 241.69            | 20.97           | 30.13           | 44.92            | 240.94         | 245.09          |
| 30               | 1017.06               | 0.65             | 11.72         | 2.81            | 7.55             | 16.74          | 251.31            | 19.25           | 25.07           | 42.85            | 250.61         | 254.24          |
| 33               | 794.80                | 0.97             | 10.16         | 4.33            | 6.61             | 15.27          | 184.04            | 14.57           | 21.27           | 38.06            | 182.99         | 186.91          |
| 36               | 682.99                | 0.69             | 7.64          | 2.36            | 5.41             | 14.07          | 148.44            | 10.05           | 19.15           | 32.81            | 147.36         | 150.97          |
| 39               | 551.37                | 0.71             | 17.14         | 3.08            | 4.50             | 12.90          | 111.75            | 6.91            | 16.14           | 27.42            | 111.96         | 115.27          |
| 42               | 431.64                | 0.31             | 14.28         | 2.76            | 4.32             | 23.04          | 110.50            | 4.35            | 14.38           | 37.51            | 108.58         | 114.87          |
| 45               | 354.42                | 1.04             | 23.32         | 3.01            | 6.23             | 36.09          | 109.13            | 7.72            | 21.20           | 46.47            | 110.25         | 119.64          |
| 48               | 264.71                | 0.36             | 4.95          | 3.17            | 4.30             | 27.25          | 62.52             | 4.80            | 11.15           | 40.74            | 56.50          | 69.66           |
| 52               | 213.46                | 0.18             | 3.58          | 1.32            | 2.80             | 13.50          | 56.69             | 2.64            | 5.80            | 27.97            | 51.73          | 58.81           |
| 56               | 172.62                | 0.39             | 5.06          | 3.49            | 3.17             | 12.33          | 50.06             | 4.06            | 11.55           | 26.01            | 46.68          | 53.44           |
| 60               | 190.86                | 0.12             | 3.44          | 2.64            | 1.28             | 3.80           | 46.42             | 2.93            | 5.62            | 18.32            | 43.53          | 47.23           |
| 64               | 161.22                | 0.26             | 1.07          | 2.79            | 3.54             | 12.51          | 51.29             | 2.96            | 9.66            | 18.58            | 50.65          | 53.95           |
| 68               | 167.89                | 0.16             | 1.83          | 1.73            | 3.66             | 4.92           | 44.20             | 2.96            | 16.47           | 21.45            | 42.64          | 47.73           |

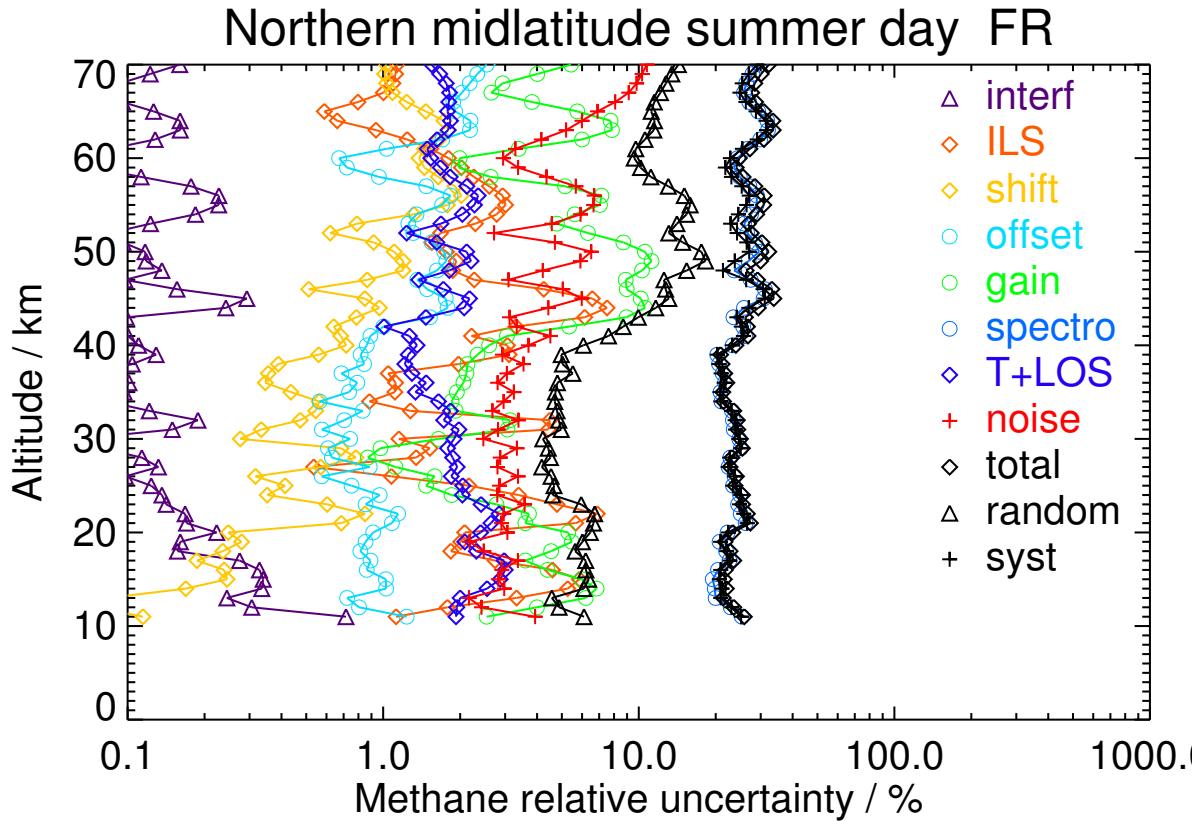

**Figure S13.** V8H\_CH4\_61 Northern midlatitude summer day

**Table S14.** Methane error budget for Northern midlatitude summer night. All uncertainties are  $1\sigma$ .

| altitude<br>(km) | mean target<br>(ppbv) | interf<br>(ppbv) | ILS<br>(ppbv) | shift<br>(ppbv) | offset<br>(ppbv) | gain<br>(ppbv) | spectro<br>(ppbv) | T+LOS<br>(ppbv) | noise<br>(ppbv) | random<br>(ppbv) | syst<br>(ppbv) | total<br>(ppbv) |
|------------------|-----------------------|------------------|---------------|-----------------|------------------|----------------|-------------------|-----------------|-----------------|------------------|----------------|-----------------|
| 12               | 1791.40               | 7.53             | 20.34         | 1.09            | 16.51            | 46.52          | 421.02            | 34.65           | 51.11           | 86.10            | 420.20         | 428.93          |
| 15               | 1890.44               | 6.78             | 87.67         | 2.93            | 17.20            | 112.69         | 298.34            | 48.71           | 51.16           | 111.83           | 319.72         | 338.72          |
| 18               | 1599.47               | 3.32             | 32.69         | 3.08            | 12.63            | 55.32          | 348.62            | 40.40           | 43.53           | 92.44            | 347.60         | 359.68          |
| 21               | 1227.12               | 2.53             | 53.22         | 4.16            | 10.40            | 19.11          | 314.80            | 28.87           | 36.34           | 60.66            | 317.65         | 323.39          |
| 24               | 1096.50               | 1.62             | 36.78         | 1.78            | 9.47             | 17.55          | 273.06            | 21.92           | 32.49           | 47.03            | 275.03         | 279.02          |
| 27               | 1102.36               | 1.49             | 5.84          | 3.83            | 8.41             | 11.31          | 247.73            | 19.17           | 30.32           | 42.59            | 247.17         | 250.81          |
| 30               | 954.35                | 0.65             | 5.78          | 2.00            | 7.22             | 14.34          | 250.07            | 17.11           | 26.46           | 42.76            | 248.99         | 252.64          |
| 33               | 824.06                | 1.07             | 13.74         | 4.53            | 6.60             | 16.77          | 193.32            | 13.50           | 22.20           | 35.53            | 193.18         | 196.42          |
| 36               | 674.28                | 0.84             | 6.00          | 1.53            | 5.39             | 10.73          | 152.99            | 9.59            | 20.20           | 30.63            | 152.15         | 155.20          |
| 39               | 538.38                | 0.37             | 15.80         | 2.73            | 4.48             | 12.71          | 117.18            | 6.51            | 17.89           | 26.60            | 117.58         | 120.55          |
| 42               | 417.87                | 0.46             | 7.73          | 2.41            | 3.46             | 13.63          | 104.34            | 4.05            | 17.11           | 30.93            | 102.48         | 107.05          |
| 45               | 372.21                | 1.03             | 18.18         | 2.77            | 5.62             | 34.23          | 90.39             | 8.17            | 19.92           | 39.58            | 92.79          | 100.88          |
| 48               | 298.70                | 0.21             | 4.25          | 3.55            | 3.00             | 20.27          | 72.68             | 3.93            | 7.92            | 39.66            | 65.10          | 76.23           |
| 52               | 225.56                | 0.13             | 4.70          | 1.01            | 2.45             | 10.95          | 56.71             | 2.75            | 6.56            | 23.06            | 53.71          | 58.45           |
| 56               | 189.71                | 0.32             | 5.34          | 3.83            | 2.97             | 11.51          | 48.92             | 4.22            | 11.06           | 22.87            | 46.85          | 52.14           |
| 60               | 200.96                | 0.14             | 2.29          | 2.69            | 1.56             | 3.81           | 49.23             | 3.68            | 7.31            | 17.21            | 47.16          | 50.20           |
| 64               | 186.49                | 0.29             | 1.67          | 2.39            | 3.43             | 11.10          | 57.31             | 3.54            | 9.67            | 16.32            | 57.16          | 59.44           |
| 68               | 182.52                | 0.18             | 3.10          | 1.64            | 4.59             | 6.26           | 52.17             | 4.77            | 20.43           | 24.88            | 51.14          | 56.87           |

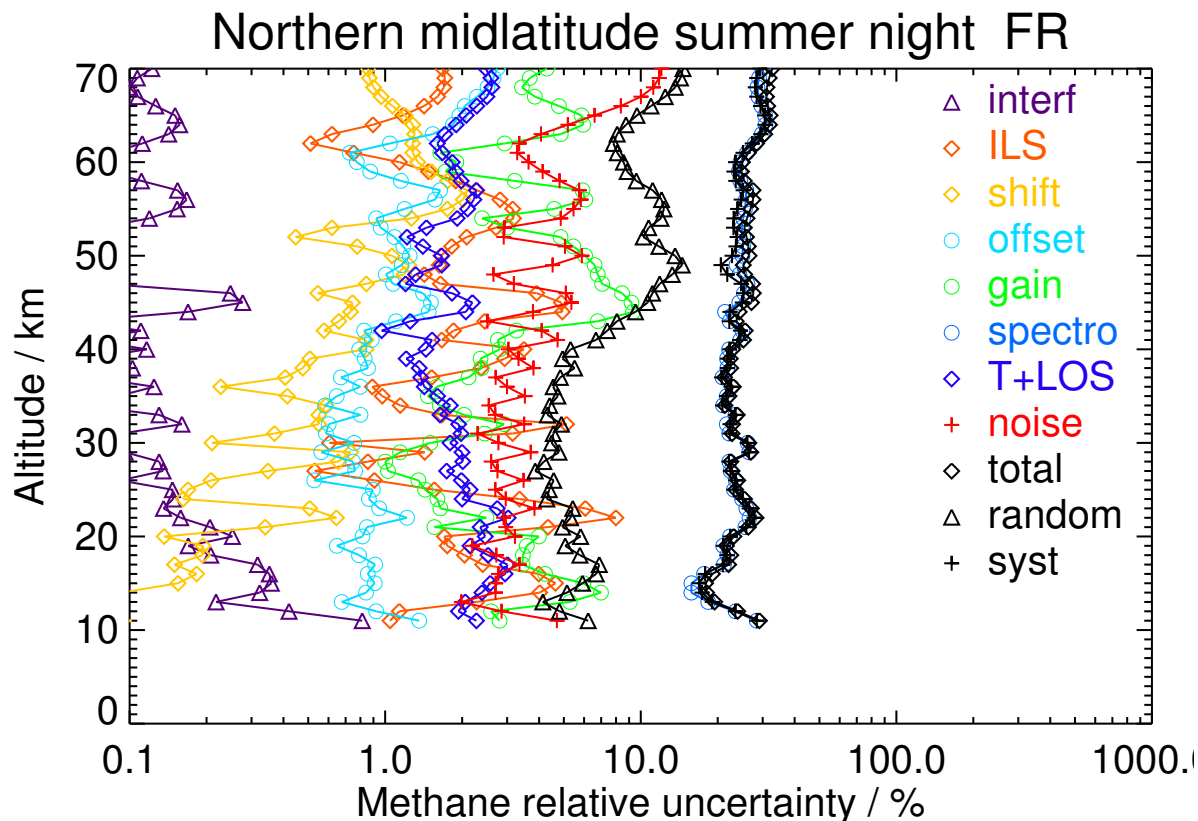

**Figure S14.** V8H\_CH4\_61 Northern midlatitude summer night



**Table S15.** Methane error budget for Northern midlatitude autumn day. All uncertainties are  $1\sigma$ .

| altitude<br>(km) | mean target<br>(ppbv) | interf<br>(ppbv) | ILS<br>(ppbv) | shift<br>(ppbv) | offset<br>(ppbv) | gain<br>(ppbv) | spectro<br>(ppbv) | T+LOS<br>(ppbv) | noise<br>(ppbv) | random<br>(ppbv) | syst<br>(ppbv) | total<br>(ppbv) |
|------------------|-----------------------|------------------|---------------|-----------------|------------------|----------------|-------------------|-----------------|-----------------|------------------|----------------|-----------------|
| 12               | 1821.12               | 8.29             | 38.44         | 1.50            | 21.32            | 50.56          | 428.91            | 37.92           | 62.07           | 103.30           | 427.96         | 440.25          |
| 15               | 1906.00               | 5.80             | 76.63         | 3.26            | 17.91            | 102.87         | 362.28            | 48.39           | 56.62           | 122.77           | 372.21         | 391.93          |
| 18               | 1599.35               | 3.43             | 106.27        | 3.69            | 16.23            | 101.20         | 332.26            | 59.30           | 47.06           | 172.04           | 329.17         | 371.41          |
| 21               | 1257.58               | 2.51             | 64.07         | 4.37            | 13.69            | 61.35          | 307.78            | 37.17           | 43.29           | 123.40           | 301.39         | 325.68          |
| 24               | 1099.64               | 1.20             | 54.78         | 4.52            | 9.25             | 26.76          | 274.79            | 23.73           | 37.87           | 67.25            | 277.15         | 285.19          |
| 27               | 1031.16               | 1.15             | 21.47         | 2.37            | 8.20             | 13.39          | 246.36            | 17.93           | 32.79           | 52.94            | 244.95         | 250.61          |
| 30               | 988.98                | 1.06             | 14.45         | 2.05            | 7.61             | 16.02          | 251.96            | 16.49           | 29.19           | 56.61            | 248.86         | 255.22          |
| 33               | 870.49                | 0.97             | 18.11         | 4.08            | 6.95             | 20.82          | 201.26            | 12.92           | 23.97           | 51.82            | 198.46         | 205.12          |
| 36               | 733.56                | 0.59             | 4.17          | 2.14            | 5.98             | 18.02          | 159.11            | 9.23            | 21.09           | 37.98            | 157.43         | 161.95          |
| 39               | 661.51                | 0.46             | 11.53         | 4.10            | 5.41             | 18.31          | 129.01            | 7.36            | 19.15           | 35.15            | 127.85         | 132.59          |
| 42               | 553.29                | 0.28             | 6.79          | 3.64            | 4.34             | 16.43          | 123.80            | 5.07            | 16.41           | 33.62            | 121.82         | 126.37          |
| 45               | 512.22                | 0.66             | 13.12         | 1.37            | 6.11             | 33.37          | 122.65            | 7.79            | 14.65           | 37.71            | 123.37         | 129.01          |
| 48               | 460.31                | 0.20             | 4.72          | 6.27            | 6.84             | 37.46          | 110.82            | 9.05            | 10.45           | 39.41            | 111.49         | 118.25          |
| 52               | 417.60                | 0.17             | 10.81         | 2.38            | 5.99             | 27.08          | 91.13             | 5.71            | 9.01            | 28.75            | 92.10          | 96.49           |
| 56               | 273.24                | 0.34             | 9.64          | 4.65            | 4.47             | 12.20          | 84.27             | 5.73            | 11.16           | 22.59            | 83.86          | 86.85           |
| 60               | 267.80                | 0.16             | 2.93          | 2.58            | 2.17             | 3.37           | 59.78             | 5.54            | 9.04            | 13.88            | 59.37          | 60.97           |
| 64               | 153.21                | 0.24             | 1.25          | 2.61            | 4.15             | 12.43          | 52.30             | 4.81            | 9.62            | 16.33            | 52.58          | 55.06           |
| 68               | 114.63                | 0.09             | 1.30          | 1.09            | 4.72             | 6.23           | 34.45             | 3.37            | 20.24           | 23.10            | 33.74          | 40.89           |

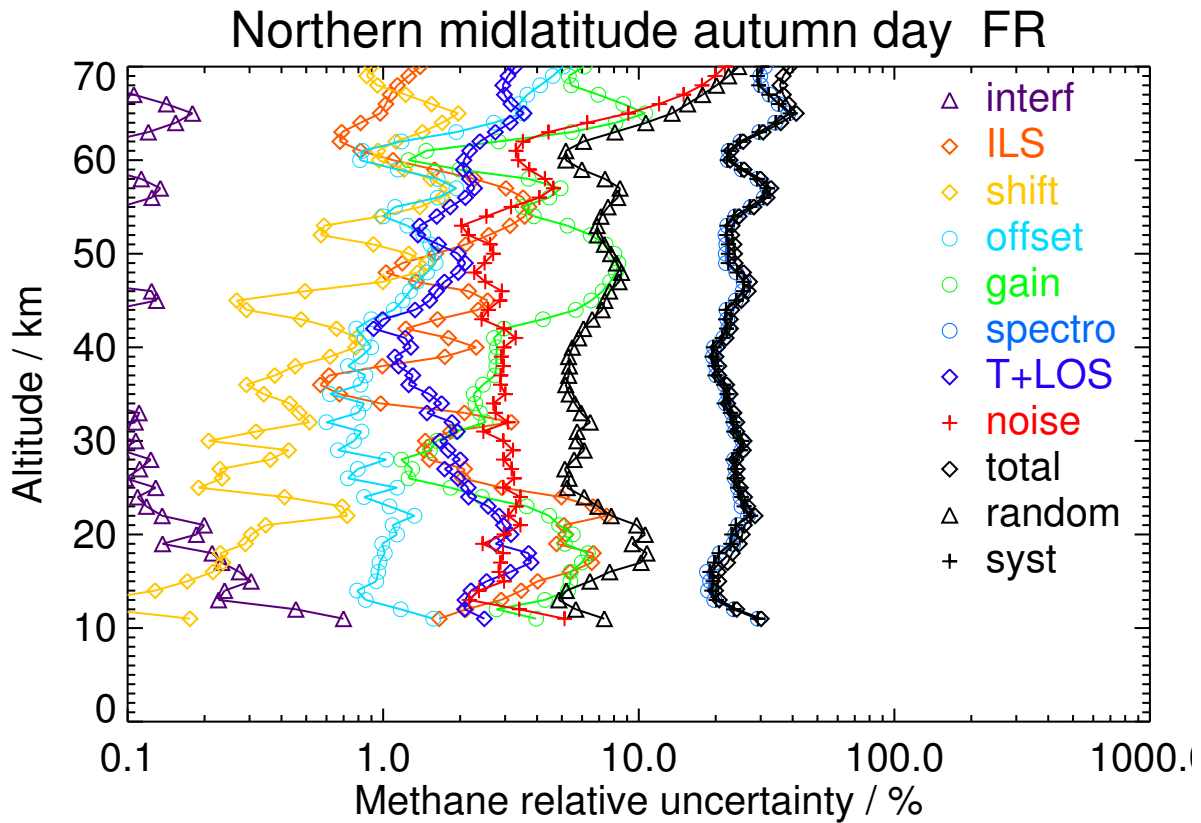

**Figure S15.** V8H\_CH4\_61 Northern midlatitude autumn day



**Table S16.** Methane error budget for Northern midlatitude autumn night. All uncertainties are  $1\sigma$ .

| altitude (km) | mean target (ppbv) | interf (ppbv) | ILS (ppbv) | shift (ppbv) | offset (ppbv) | gain (ppbv) | spectro (ppbv) | T+LOS (ppbv) | noise (ppbv) | random (ppbv) | syst (ppbv) | total (ppbv) |
|---------------|--------------------|---------------|------------|--------------|---------------|-------------|----------------|--------------|--------------|---------------|-------------|--------------|
| 9             | 1635.24            | 16.60         | 4.51       | 1.01         | 27.81         | 98.55       | 501.80         | 43.60        | 90.15        | 119.36        | 508.30      | 522.12       |
| 12            | 1810.93            | 5.72          | 27.32      | 2.26         | 16.53         | 94.26       | 395.73         | 34.50        | 48.44        | 126.57        | 392.51      | 412.41       |
| 15            | 1795.28            | 4.79          | 49.16      | 3.90         | 14.61         | 98.51       | 342.68         | 46.23        | 52.67        | 118.12        | 347.51      | 367.03       |
| 18            | 1680.03            | 2.66          | 117.99     | 5.80         | 16.95         | 130.45      | 329.15         | 61.03        | 46.50        | 174.43        | 339.22      | 381.44       |
| 21            | 1315.79            | 2.41          | 76.02      | 5.18         | 17.00         | 101.74      | 304.41         | 43.40        | 43.16        | 151.40        | 299.90      | 335.95       |
| 24            | 1176.88            | 1.09          | 61.32      | 8.38         | 11.89         | 60.41       | 282.31         | 27.11        | 38.44        | 93.44         | 284.26      | 299.22       |
| 27            | 1040.27            | 1.02          | 27.68      | 3.83         | 8.56          | 23.72       | 258.09         | 19.60        | 34.68        | 64.14         | 255.93      | 263.84       |
| 30            | 973.08             | 1.27          | 22.67      | 1.91         | 7.31          | 20.91       | 248.40         | 18.69        | 31.05        | 63.10         | 245.04      | 253.03       |
| 33            | 836.20             | 0.79          | 14.34      | 3.65         | 6.21          | 16.85       | 193.11         | 14.14        | 25.35        | 52.82         | 189.43      | 196.66       |
| 36            | 696.31             | 0.53          | 8.63       | 2.64         | 5.44          | 18.61       | 157.86         | 9.71         | 21.46        | 47.42         | 153.90      | 161.04       |
| 39            | 578.97             | 0.51          | 15.42      | 3.56         | 5.37          | 22.63       | 132.91         | 6.98         | 18.91        | 47.58         | 128.83      | 137.34       |
| 42            | 481.50             | 0.28          | 11.60      | 2.87         | 4.63          | 20.96       | 122.06         | 5.61         | 17.19        | 50.48         | 115.25      | 125.82       |
| 45            | 415.57             | 0.59          | 16.26      | 1.57         | 6.23          | 34.62       | 103.71         | 7.87         | 14.57        | 52.06         | 99.11       | 111.95       |
| 48            | 363.60             | 0.24          | 6.37       | 3.66         | 5.19          | 30.48       | 95.11          | 6.36         | 9.26         | 44.56         | 90.54       | 100.91       |
| 52            | 337.59             | 0.21          | 6.47       | 1.81         | 5.17          | 23.94       | 82.23          | 4.89         | 8.53         | 33.01         | 80.08       | 86.62        |
| 56            | 278.91             | 0.37          | 5.98       | 3.80         | 3.79          | 10.68       | 71.82          | 5.04         | 11.19        | 22.90         | 70.45       | 74.08        |
| 60            | 238.27             | 0.21          | 1.89       | 2.27         | 2.66          | 4.92        | 58.43          | 4.75         | 9.66         | 15.00         | 57.84       | 59.75        |
| 64            | 170.37             | 0.24          | 1.49       | 2.29         | 3.53          | 10.78       | 49.52          | 4.46         | 9.48         | 17.69         | 48.84       | 51.95        |
| 68            | 119.25             | 0.12          | 1.86       | 1.27         | 4.97          | 6.81        | 37.28          | 4.03         | 21.17        | 25.28         | 35.94       | 43.94        |

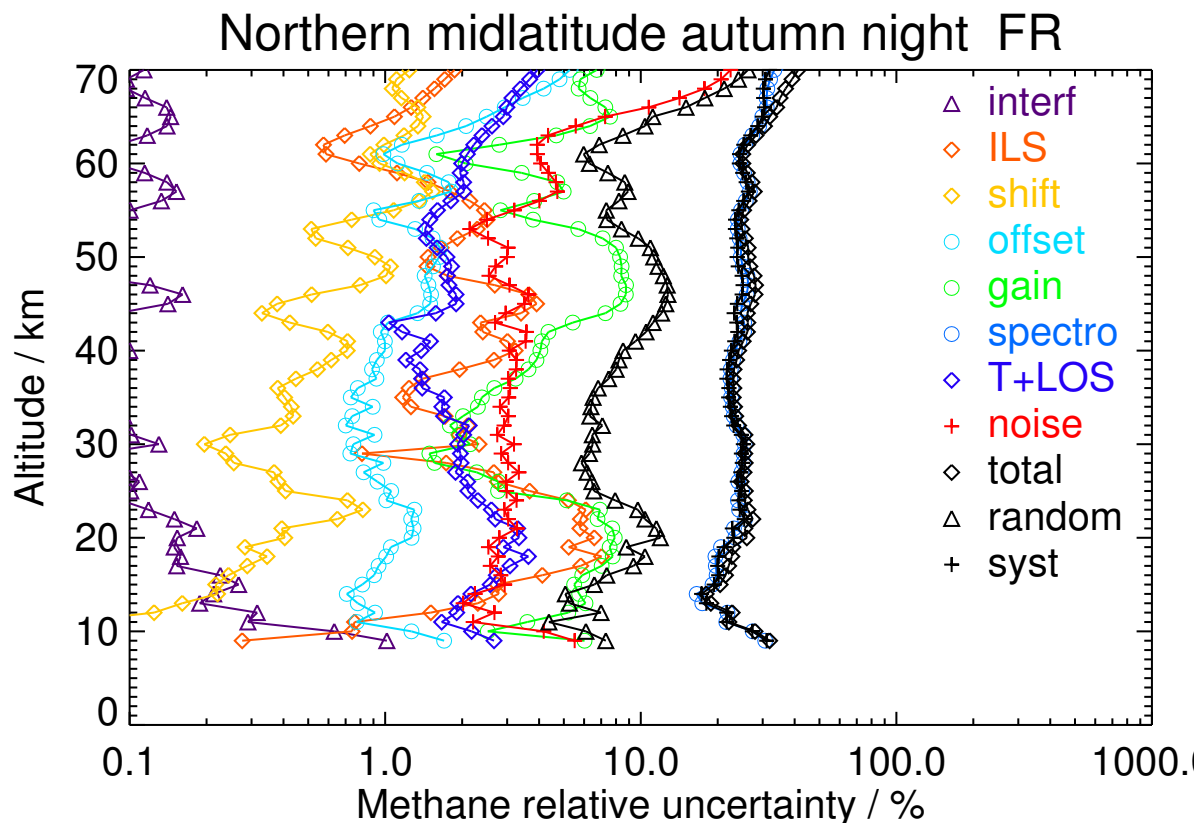

**Figure S16.** V8H\_CH4\_61 Northern midlatitude autumn night

**Table S17.** Methane error budget for Tropics day. All uncertainties are  $1\sigma$ .

| altitude<br>(km) | mean target<br>(ppbv) | interf<br>(ppbv) | ILS<br>(ppbv) | shift<br>(ppbv) | offset<br>(ppbv) | gain<br>(ppbv) | spectro<br>(ppbv) | T+LOS<br>(ppbv) | noise<br>(ppbv) | random<br>(ppbv) | syst<br>(ppbv) | total<br>(ppbv) |
|------------------|-----------------------|------------------|---------------|-----------------|------------------|----------------|-------------------|-----------------|-----------------|------------------|----------------|-----------------|
| 12               | 1904.76               | 4.35             | 50.15         | 8.97            | 12.79            | 96.16          | 356.48            | 38.44           | 47.75           | 100.31           | 364.42         | 377.97          |
| 15               | 1890.71               | 10.30            | 115.31        | 13.27           | 21.87            | 66.73          | 358.81            | 60.05           | 60.95           | 109.09           | 377.72         | 393.16          |
| 18               | 1778.17               | 5.92             | 88.75         | 13.27           | 22.42            | 49.83          | 369.23            | 61.04           | 60.66           | 126.01           | 372.74         | 393.46          |
| 21               | 1620.31               | 2.81             | 31.56         | 5.81            | 19.57            | 24.18          | 379.91            | 42.07           | 48.36           | 81.59            | 379.20         | 387.87          |
| 24               | 1608.92               | 1.36             | 32.41         | 7.01            | 13.25            | 34.05          | 369.66            | 29.82           | 38.96           | 60.99            | 371.17         | 376.15          |
| 27               | 1467.06               | 1.10             | 18.31         | 7.59            | 9.97             | 20.19          | 352.29            | 26.25           | 35.44           | 59.06            | 351.38         | 356.31          |
| 30               | 1476.20               | 1.41             | 39.10         | 3.99            | 7.54             | 40.96          | 362.91            | 25.07           | 30.00           | 59.40            | 364.67         | 369.48          |
| 33               | 1324.19               | 1.54             | 28.02         | 7.17            | 6.95             | 32.28          | 284.82            | 19.92           | 26.88           | 51.64            | 285.49         | 290.12          |
| 36               | 1157.37               | 0.74             | 11.80         | 6.90            | 6.03             | 23.18          | 227.30            | 13.63           | 23.85           | 42.06            | 226.74         | 230.61          |
| 39               | 877.30                | 0.56             | 16.78         | 5.53            | 5.36             | 13.16          | 188.27            | 10.86           | 22.52           | 36.55            | 187.74         | 191.27          |
| 42               | 712.50                | 0.93             | 34.44         | 5.31            | 9.41             | 50.29          | 165.97            | 9.51            | 15.66           | 46.68            | 171.85         | 178.08          |
| 45               | 552.56                | 0.66             | 22.37         | 2.56            | 8.17             | 48.73          | 137.31            | 8.42            | 14.05           | 35.47            | 144.27         | 148.56          |
| 48               | 440.22                | 0.24             | 8.29          | 5.14            | 6.37             | 39.39          | 111.08            | 8.20            | 15.12           | 44.97            | 110.91         | 119.68          |
| 52               | 320.11                | 0.27             | 5.67          | 1.95            | 3.70             | 16.48          | 71.82             | 5.32            | 10.31           | 28.28            | 69.38          | 74.92           |
| 56               | 242.32                | 0.32             | 4.96          | 3.79            | 3.14             | 11.69          | 59.51             | 4.50            | 9.86            | 21.20            | 58.27          | 62.01           |
| 60               | 202.06                | 0.11             | 5.83          | 3.71            | 2.64             | 9.98           | 54.04             | 4.03            | 6.23            | 13.65            | 54.25          | 55.94           |
| 64               | 177.72                | 0.14             | 1.40          | 3.11            | 2.95             | 8.90           | 49.76             | 3.52            | 9.34            | 15.01            | 49.50          | 51.73           |
| 68               | 163.07                | 0.16             | 2.45          | 2.22            | 3.03             | 6.29           | 43.88             | 3.60            | 12.83           | 17.32            | 43.16          | 46.51           |

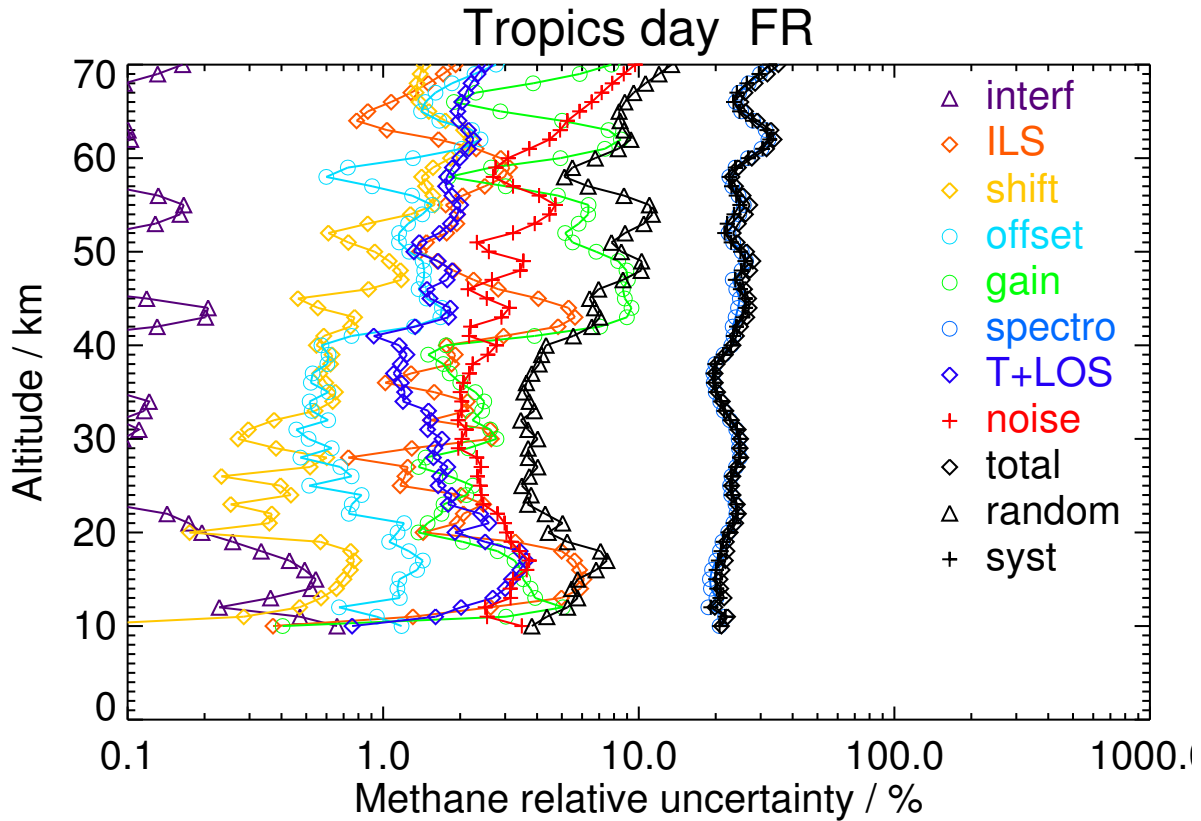

**Figure S17.** V8H\_CH4\_61 Tropics day

**Table S18.** Methane error budget for Tropics night. All uncertainties are  $1\sigma$ .

| altitude<br>(km) | mean target<br>(ppbv) | interf<br>(ppbv) | ILS<br>(ppbv) | shift<br>(ppbv) | offset<br>(ppbv) | gain<br>(ppbv) | spectro<br>(ppbv) | T+LOS<br>(ppbv) | noise<br>(ppbv) | random<br>(ppbv) | syst<br>(ppbv) | total<br>(ppbv) |
|------------------|-----------------------|------------------|---------------|-----------------|------------------|----------------|-------------------|-----------------|-----------------|------------------|----------------|-----------------|
| 12               | 1907.14               | 5.67             | 13.47         | 5.14            | 10.87            | 112.17         | 332.93            | 32.20           | 50.18           | 102.53           | 341.79         | 356.84          |
| 15               | 1858.51               | 9.80             | 73.03         | 16.37           | 19.67            | 61.16          | 359.50            | 50.00           | 56.88           | 122.78           | 360.17         | 380.53          |
| 18               | 1840.00               | 6.38             | 65.59         | 16.94           | 23.51            | 51.36          | 386.78            | 56.51           | 61.45           | 116.79           | 388.26         | 405.45          |
| 21               | 1655.19               | 3.17             | 28.96         | 8.71            | 20.31            | 23.23          | 395.88            | 41.72           | 49.85           | 77.21            | 396.06         | 403.51          |
| 24               | 1638.57               | 1.43             | 16.56         | 6.74            | 13.68            | 33.32          | 375.42            | 30.27           | 39.03           | 58.82            | 376.22         | 380.79          |
| 27               | 1527.71               | 1.06             | 9.85          | 8.88            | 9.92             | 27.25          | 356.06            | 26.71           | 33.98           | 53.60            | 356.08         | 360.09          |
| 30               | 1536.44               | 1.39             | 40.69         | 4.37            | 7.38             | 41.76          | 374.65            | 25.98           | 28.49           | 53.98            | 377.37         | 381.21          |
| 33               | 1363.96               | 1.51             | 18.60         | 8.17            | 6.69             | 29.22          | 286.42            | 19.66           | 26.16           | 44.82            | 287.07         | 290.55          |
| 36               | 1215.49               | 0.70             | 14.13         | 6.45            | 6.54             | 27.60          | 234.74            | 14.02           | 23.26           | 40.37            | 235.07         | 238.51          |
| 39               | 906.40                | 0.57             | 22.31         | 5.04            | 5.67             | 14.42          | 191.11            | 11.47           | 21.64           | 35.25            | 191.42         | 194.64          |
| 42               | 688.11                | 0.40             | 23.97         | 4.56            | 6.65             | 39.52          | 159.37            | 7.35            | 14.21           | 36.82            | 162.79         | 166.90          |
| 45               | 534.21                | 0.87             | 18.31         | 2.79            | 8.19             | 48.53          | 129.16            | 9.19            | 16.61           | 32.09            | 137.04         | 140.75          |
| 48               | 404.92                | 0.31             | 9.31          | 5.08            | 5.46             | 34.23          | 95.31             | 7.31            | 13.94           | 41.44            | 94.49          | 103.18          |
| 52               | 283.91                | 0.15             | 8.60          | 1.99            | 2.04             | 6.91           | 64.80             | 4.99            | 8.60            | 16.51            | 64.46          | 66.54           |
| 56               | 230.91                | 0.25             | 9.10          | 3.55            | 2.50             | 9.80           | 53.34             | 5.03            | 9.86            | 19.96            | 52.61          | 56.27           |
| 60               | 201.14                | 0.10             | 3.06          | 3.63            | 2.06             | 6.37           | 50.85             | 3.76            | 6.15            | 10.96            | 50.84          | 52.01           |
| 64               | 179.12                | 0.20             | 2.50          | 3.60            | 4.12             | 13.81          | 50.89             | 4.05            | 9.54            | 14.52            | 52.09          | 54.07           |
| 68               | 165.73                | 0.16             | 2.05          | 1.78            | 3.34             | 6.23           | 42.90             | 4.04            | 14.15           | 16.46            | 42.94          | 45.98           |

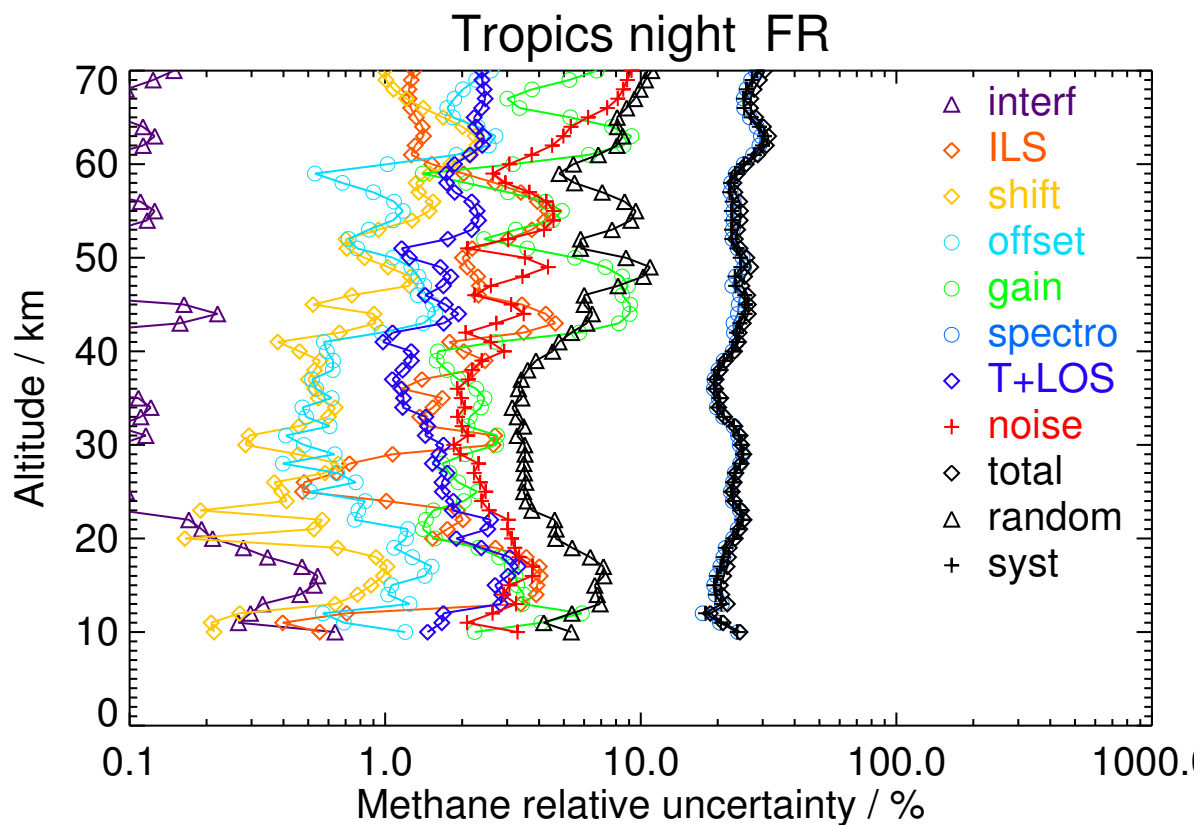

**Figure S18.** V8H\_CH4\_61 Tropics night

**Table S19.** Methane error budget for Southern midlatitude winter day. All uncertainties are  $1\sigma$ .

| altitude (km) | mean target (ppbv) | interf (ppbv) | ILS (ppbv) | shift (ppbv) | offset (ppbv) | gain (ppbv) | spectro (ppbv) | T+LOS (ppbv) | noise (ppbv) | random (ppbv) | syst (ppbv) | total (ppbv) |
|---------------|--------------------|---------------|------------|--------------|---------------|-------------|----------------|--------------|--------------|---------------|-------------|--------------|
| 9             | 1724.83            | 10.04         | 13.65      | 1.81         | 24.80         | 60.22       | 430.23         | 46.28        | 75.45        | 116.96        | 428.70      | 444.37       |
| 12            | 1717.92            | 5.54          | 26.68      | 2.03         | 16.81         | 77.22       | 385.37         | 36.98        | 53.84        | 101.45        | 386.62      | 399.71       |
| 15            | 1621.34            | 3.56          | 38.33      | 3.77         | 13.88         | 64.48       | 361.68         | 45.18        | 52.46        | 109.43        | 359.83      | 376.10       |
| 18            | 1665.52            | 2.77          | 107.20     | 5.21         | 16.65         | 125.37      | 351.33         | 71.59        | 50.84        | 140.66        | 372.67      | 398.33       |
| 21            | 1501.19            | 3.20          | 38.91      | 6.42         | 16.94         | 104.22      | 339.72         | 41.16        | 46.07        | 102.05        | 348.61      | 363.24       |
| 24            | 1313.53            | 1.43          | 38.07      | 11.76        | 13.11         | 71.45       | 318.82         | 27.57        | 40.58        | 80.22         | 323.24      | 333.05       |
| 27            | 1197.31            | 1.10          | 18.56      | 6.23         | 10.75         | 39.56       | 297.62         | 25.23        | 38.08        | 72.83         | 295.68      | 304.52       |
| 30            | 1194.72            | 1.24          | 20.34      | 3.84         | 9.73          | 29.56       | 302.09         | 26.99        | 35.43        | 88.50         | 294.63      | 307.63       |
| 33            | 808.06             | 0.93          | 10.71      | 3.34         | 7.60          | 14.91       | 203.13         | 19.00        | 30.52        | 66.16         | 196.43      | 207.27       |
| 36            | 547.53             | 0.57          | 10.10      | 3.05         | 6.37          | 13.17       | 142.17         | 11.63        | 25.90        | 54.64         | 135.49      | 146.10       |
| 39            | 374.52             | 0.41          | 12.47      | 3.44         | 5.06          | 16.79       | 97.66          | 7.45         | 21.23        | 54.40         | 86.95       | 102.56       |
| 42            | 260.73             | 0.39          | 7.28       | 2.31         | 3.55          | 10.94       | 66.74          | 4.91         | 17.15        | 32.91         | 62.29       | 70.45        |
| 45            | 258.31             | 0.47          | 6.81       | 1.90         | 4.04          | 16.61       | 59.01          | 5.95         | 15.13        | 28.43         | 57.28       | 63.95        |
| 48            | 261.42             | 0.16          | 3.92       | 2.53         | 2.66          | 12.27       | 60.02          | 3.87         | 7.81         | 24.14         | 57.23       | 62.11        |
| 52            | 254.34             | 0.24          | 8.53       | 1.95         | 3.58          | 11.51       | 61.40          | 3.62         | 10.01        | 24.33         | 59.27       | 64.07        |
| 56            | 211.73             | 0.33          | 6.74       | 3.38         | 4.68          | 12.54       | 58.68          | 4.26         | 12.76        | 31.00         | 53.84       | 62.13        |
| 60            | 195.80             | 0.17          | 2.71       | 1.66         | 2.50          | 5.40        | 49.42          | 3.73         | 9.60         | 19.54         | 47.04       | 50.93        |
| 64            | 136.90             | 0.22          | 1.76       | 1.75         | 2.62          | 6.07        | 43.95          | 3.14         | 9.61         | 20.32         | 40.88       | 45.65        |
| 68            | 93.49              | 0.11          | 0.99       | 0.88         | 4.55          | 3.49        | 31.22          | 2.54         | 20.01        | 25.40         | 27.76       | 37.63        |

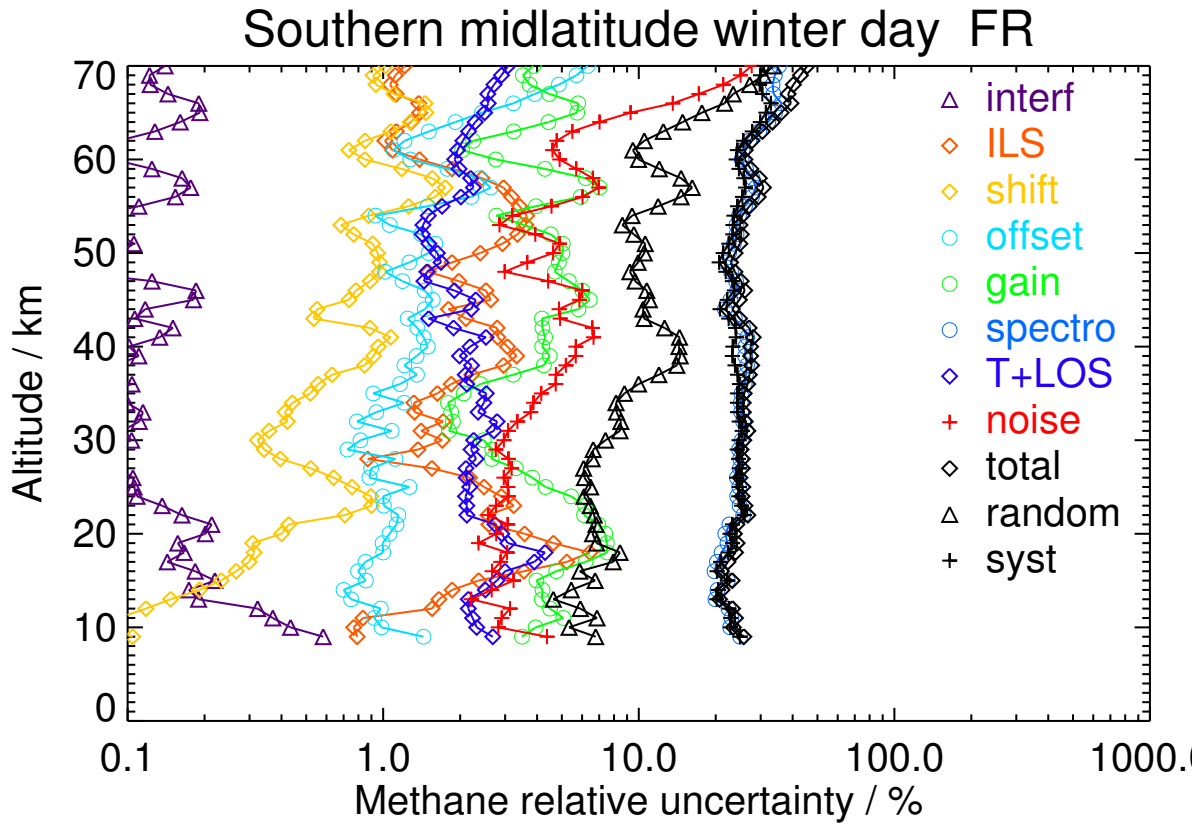

**Figure S19.** V8H\_CH4\_61 Southern midlatitude winter day

**Table S20.** Methane error budget for Southern midlatitude winter night. All uncertainties are  $1\sigma$ .

| altitude (km) | mean target (ppbv) | interf (ppbv) | ILS (ppbv) | shift (ppbv) | offset (ppbv) | gain (ppbv) | spectro (ppbv) | T+LOS (ppbv) | noise (ppbv) | random (ppbv) | syst (ppbv) | total (ppbv) |
|---------------|--------------------|---------------|------------|--------------|---------------|-------------|----------------|--------------|--------------|---------------|-------------|--------------|
| 9             | 1720.73            | 17.64         | 8.11       | 1.54         | 24.54         | 61.46       | 288.49         | 37.02        | 68.11        | 158.23        | 262.60      | 306.59       |
| 12            | 1737.53            | 5.19          | 26.87      | 1.48         | 15.84         | 84.89       | 352.24         | 35.18        | 47.49        | 106.80        | 352.66      | 368.48       |
| 15            | 1673.54            | 4.91          | 62.76      | 5.21         | 15.73         | 81.14       | 339.26         | 42.95        | 48.10        | 129.67        | 336.55      | 360.67       |
| 18            | 1605.26            | 3.11          | 95.30      | 5.12         | 17.12         | 114.00      | 317.56         | 54.27        | 47.00        | 150.81        | 325.06      | 358.33       |
| 21            | 1326.57            | 2.25          | 39.09      | 4.76         | 13.66         | 68.74       | 302.53         | 33.14        | 42.05        | 107.59        | 298.80      | 317.58       |
| 24            | 1206.80            | 1.06          | 57.10      | 8.84         | 12.98         | 61.79       | 292.51         | 29.07        | 40.43        | 102.81        | 291.20      | 308.81       |
| 27            | 1118.49            | 1.10          | 22.80      | 3.67         | 10.67         | 30.92       | 272.69         | 22.57        | 38.37        | 88.41         | 264.82      | 279.19       |
| 30            | 1065.44            | 1.24          | 14.52      | 3.20         | 8.68          | 20.82       | 279.75         | 22.47        | 34.44        | 94.87         | 267.74      | 284.05       |
| 33            | 875.70             | 0.91          | 14.92      | 3.51         | 6.99          | 20.45       | 202.92         | 18.14        | 30.25        | 73.63         | 194.17      | 207.66       |
| 36            | 558.94             | 0.48          | 9.57       | 2.43         | 5.73          | 17.52       | 138.53         | 11.51        | 24.69        | 58.12         | 130.35      | 142.72       |
| 39            | 387.04             | 0.36          | 11.75      | 2.60         | 4.62          | 17.43       | 92.79          | 7.01         | 19.99        | 38.84         | 89.55       | 97.61        |
| 42            | 265.52             | 0.25          | 7.87       | 1.91         | 3.52          | 14.37       | 67.69          | 5.14         | 16.55        | 30.93         | 64.89       | 71.88        |
| 45            | 231.56             | 0.39          | 5.23       | 1.32         | 3.29          | 13.47       | 57.07          | 4.99         | 13.02        | 26.31         | 54.59       | 60.60        |
| 48            | 251.46             | 0.22          | 3.65       | 1.69         | 2.44          | 10.63       | 62.36          | 3.23         | 8.75         | 25.58         | 58.79       | 64.11        |
| 52            | 240.04             | 0.23          | 7.48       | 1.75         | 3.69          | 14.24       | 60.22          | 3.82         | 9.97         | 27.34         | 57.17       | 63.37        |
| 56            | 221.69             | 0.27          | 4.45       | 2.83         | 3.96          | 11.73       | 55.88          | 4.03         | 10.67        | 26.71         | 52.15       | 58.60        |
| 60            | 187.85             | 0.20          | 1.27       | 1.51         | 2.93          | 5.53        | 47.81          | 3.61         | 10.60        | 21.04         | 44.85       | 49.54        |
| 64            | 136.94             | 0.19          | 1.94       | 1.20         | 2.38          | 5.65        | 36.30          | 3.43         | 9.44         | 16.65         | 34.42       | 38.23        |
| 68            | 86.57              | 0.13          | 1.31       | 0.91         | 4.77          | 4.75        | 25.96          | 2.68         | 20.90        | 24.40         | 23.89       | 34.15        |

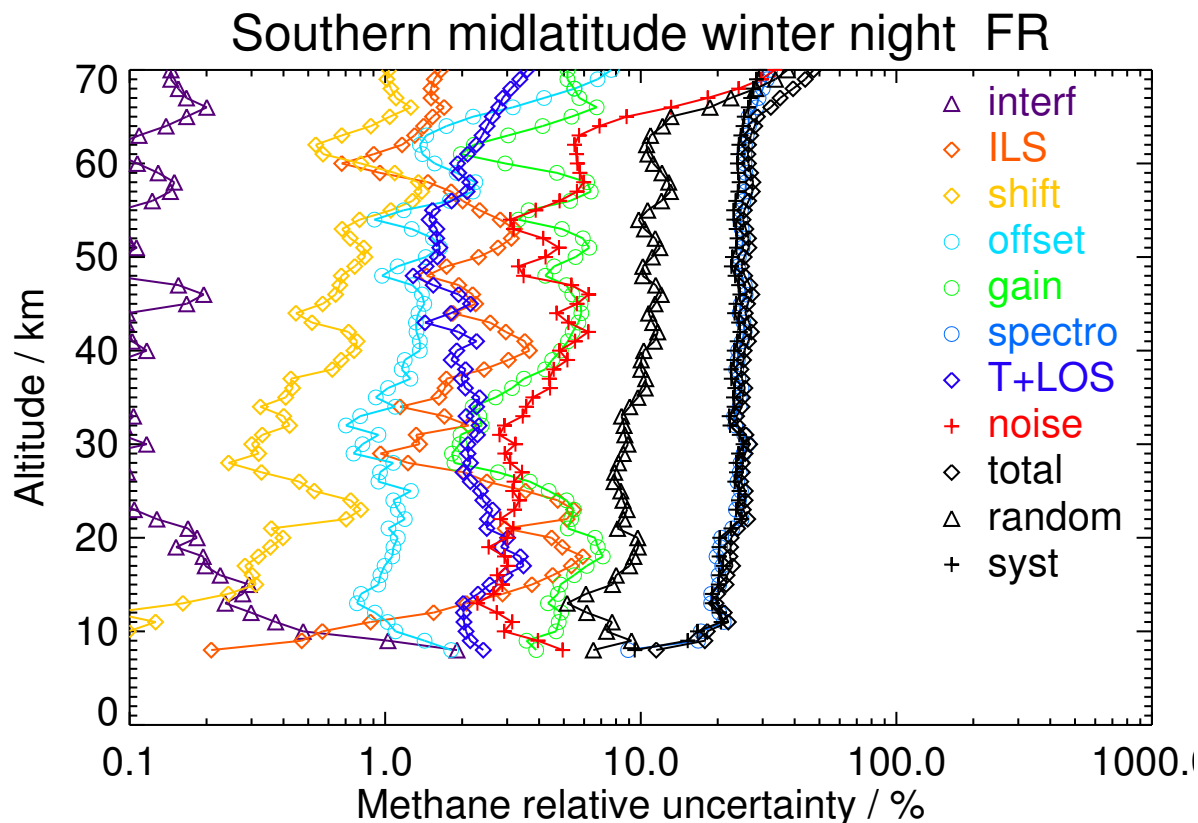

**Figure S20.** V8H\_CH4\_61 Southern midlatitude winter night

**Table S21.** Methane error budget for Southern midlatitude spring day. All uncertainties are  $1\sigma$ .

| altitude (km) | mean target (ppbv) | interf (ppbv) | ILS (ppbv) | shift (ppbv) | offset (ppbv) | gain (ppbv) | spectro (ppbv) | T+LOS (ppbv) | noise (ppbv) | random (ppbv) | syst (ppbv) | total (ppbv) |
|---------------|--------------------|---------------|------------|--------------|---------------|-------------|----------------|--------------|--------------|---------------|-------------|--------------|
| 9             | 1571.14            | 14.98         | 13.82      | 2.82         | 24.62         | 93.60       | 421.03         | 49.81        | 79.98        | 172.72        | 407.56      | 442.64       |
| 12            | 1762.20            | 6.92          | 39.07      | 1.51         | 13.63         | 100.81      | 344.24         | 39.58        | 45.46        | 102.05        | 351.63      | 366.14       |
| 15            | 1528.02            | 6.05          | 52.14      | 3.86         | 16.62         | 92.64       | 399.99         | 55.65        | 54.50        | 179.78        | 381.27      | 421.53       |
| 18            | 1679.59            | 4.60          | 169.00     | 8.87         | 22.69         | 182.25      | 308.29         | 80.11        | 48.81        | 241.05        | 328.83      | 407.72       |
| 21            | 1278.86            | 3.02          | 78.57      | 7.73         | 15.21         | 97.82       | 301.16         | 42.59        | 43.58        | 160.70        | 290.91      | 332.35       |
| 24            | 1105.11            | 1.15          | 65.75      | 12.53        | 10.65         | 63.62       | 320.75         | 28.03        | 39.26        | 152.40        | 301.04      | 337.42       |
| 27            | 1036.04            | 1.46          | 42.44      | 4.28         | 9.04          | 41.50       | 302.87         | 21.22        | 36.54        | 134.86        | 280.99      | 311.68       |
| 30            | 1096.31            | 1.83          | 34.49      | 2.62         | 7.27          | 30.11       | 289.70         | 20.98        | 35.08        | 112.93        | 273.87      | 296.24       |
| 33            | 809.88             | 0.96          | 15.23      | 3.94         | 5.78          | 17.49       | 181.89         | 15.58        | 28.30        | 59.15         | 176.68      | 186.32       |
| 36            | 603.18             | 0.53          | 7.09       | 2.33         | 5.08          | 16.08       | 132.30         | 9.43         | 22.54        | 44.05         | 128.45      | 135.80       |
| 39            | 481.72             | 0.47          | 9.11       | 2.85         | 4.56          | 16.54       | 99.05          | 6.36         | 18.44        | 34.30         | 96.95       | 102.84       |
| 42            | 466.03             | 0.37          | 8.38       | 3.52         | 4.14          | 18.24       | 106.94         | 5.58         | 16.47        | 29.14         | 106.40      | 110.32       |
| 45            | 453.72             | 0.55          | 15.65      | 1.61         | 6.29          | 35.18       | 101.29         | 7.92         | 12.90        | 41.31         | 101.52      | 109.60       |
| 48            | 420.79             | 0.32          | 10.18      | 3.99         | 6.46          | 36.33       | 103.33         | 7.19         | 11.00        | 40.69         | 103.32      | 111.05       |
| 52            | 341.33             | 0.21          | 8.18       | 2.40         | 4.27          | 19.99       | 83.02          | 4.86         | 10.70        | 29.88         | 81.41       | 86.72        |
| 56            | 245.57             | 0.30          | 9.23       | 4.34         | 3.45          | 12.84       | 68.95          | 5.40         | 9.75         | 24.16         | 67.65       | 71.83        |
| 60            | 220.25             | 0.21          | 3.10       | 2.64         | 2.43          | 5.54        | 51.75          | 3.85         | 8.61         | 14.73         | 51.02       | 53.10        |
| 64            | 126.35             | 0.29          | 1.98       | 3.13         | 4.26          | 14.63       | 48.39          | 4.29         | 7.94         | 18.52         | 48.23       | 51.66        |
| 68            | 94.98              | 0.18          | 1.97       | 1.86         | 5.12          | 12.02       | 36.99          | 3.18         | 19.27        | 25.23         | 35.94       | 43.91        |

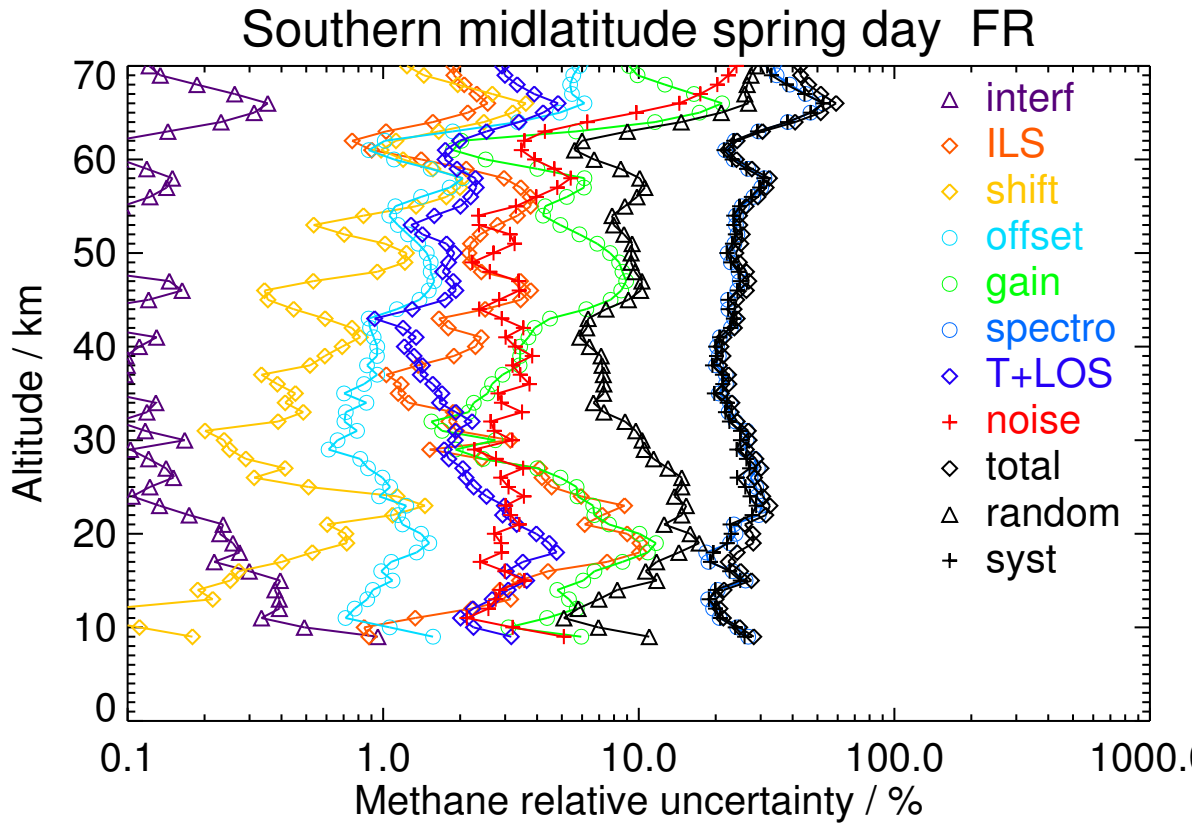

**Figure S21.** V8H\_CH4\_61 Southern midlatitude spring day

**Table S22.** Methane error budget for Southern midlatitude spring night. All uncertainties are  $1\sigma$ .

| altitude (km) | mean target (ppbv) | interf (ppbv) | ILS (ppbv) | shift (ppbv) | offset (ppbv) | gain (ppbv) | spectro (ppbv) | T+LOS (ppbv) | noise (ppbv) | random (ppbv) | syst (ppbv) | total (ppbv) |
|---------------|--------------------|---------------|------------|--------------|---------------|-------------|----------------|--------------|--------------|---------------|-------------|--------------|
| 9             | 1540.68            | 16.54         | 21.61      | 3.28         | 26.99         | 108.97      | 411.94         | 53.23        | 87.62        | 184.39        | 399.45      | 439.95       |
| 12            | 1713.01            | 6.34          | 33.71      | 2.26         | 13.75         | 93.12       | 352.32         | 34.51        | 47.74        | 111.26        | 353.92      | 371.00       |
| 15            | 1603.28            | 4.77          | 60.57      | 4.21         | 16.45         | 110.71      | 442.82         | 61.99        | 55.67        | 175.51        | 434.13      | 468.26       |
| 18            | 1805.50            | 2.95          | 198.60     | 13.54        | 21.88         | 220.99      | 319.53         | 95.81        | 47.94        | 231.87        | 385.69      | 450.02       |
| 21            | 1568.42            | 3.13          | 95.88      | 6.97         | 23.12         | 178.93      | 316.45         | 56.24        | 44.42        | 166.01        | 345.72      | 383.51       |
| 24            | 1441.38            | 1.36          | 56.95      | 16.02        | 16.11         | 123.49      | 328.25         | 32.36        | 41.84        | 127.21        | 336.71      | 359.94       |
| 27            | 1356.32            | 1.18          | 37.32      | 6.72         | 8.97          | 48.74       | 328.94         | 25.38        | 39.17        | 80.02         | 328.44      | 338.04       |
| 30            | 1378.21            | 1.89          | 35.18      | 2.91         | 7.99          | 47.26       | 338.79         | 27.20        | 36.53        | 61.57         | 341.48      | 346.99       |
| 33            | 977.66             | 0.90          | 11.70      | 3.96         | 6.01          | 15.79       | 233.00         | 20.86        | 30.02        | 50.69         | 231.29      | 236.78       |
| 36            | 658.59             | 0.55          | 9.50       | 2.60         | 4.79          | 17.38       | 158.00         | 12.75        | 23.32        | 39.47         | 156.64      | 161.53       |
| 39            | 472.29             | 0.37          | 8.33       | 3.27         | 4.55          | 17.98       | 99.90          | 7.15         | 19.98        | 33.21         | 98.75       | 104.19       |
| 42            | 418.74             | 0.37          | 8.39       | 4.23         | 4.18          | 15.29       | 96.07          | 6.59         | 17.95        | 30.29         | 94.96       | 99.67        |
| 45            | 389.42             | 0.34          | 8.79       | 1.26         | 4.91          | 25.98       | 86.88          | 6.37         | 11.79        | 28.11         | 87.84       | 92.23        |
| 48            | 359.06             | 0.27          | 4.61       | 3.07         | 4.19          | 23.84       | 90.99          | 5.23         | 11.40        | 23.82         | 92.11       | 95.14        |
| 52            | 316.23             | 0.24          | 6.21       | 3.51         | 4.16          | 19.02       | 73.45          | 4.73         | 11.75        | 22.70         | 73.96       | 77.37        |
| 56            | 247.72             | 0.32          | 10.83      | 4.04         | 3.06          | 10.24       | 63.44          | 4.92         | 9.48         | 19.17         | 63.40       | 66.23        |
| 60            | 199.17             | 0.26          | 4.13       | 3.06         | 3.01          | 6.57        | 50.44          | 3.82         | 8.85         | 14.77         | 49.98       | 52.11        |
| 64            | 134.95             | 0.29          | 2.44       | 2.77         | 3.20          | 10.23       | 42.80          | 3.90         | 7.01         | 14.27         | 42.67       | 45.00        |
| 68            | 86.34              | 0.20          | 1.96       | 1.84         | 4.59          | 10.54       | 32.54          | 3.21         | 16.80        | 21.64         | 31.97       | 38.61        |

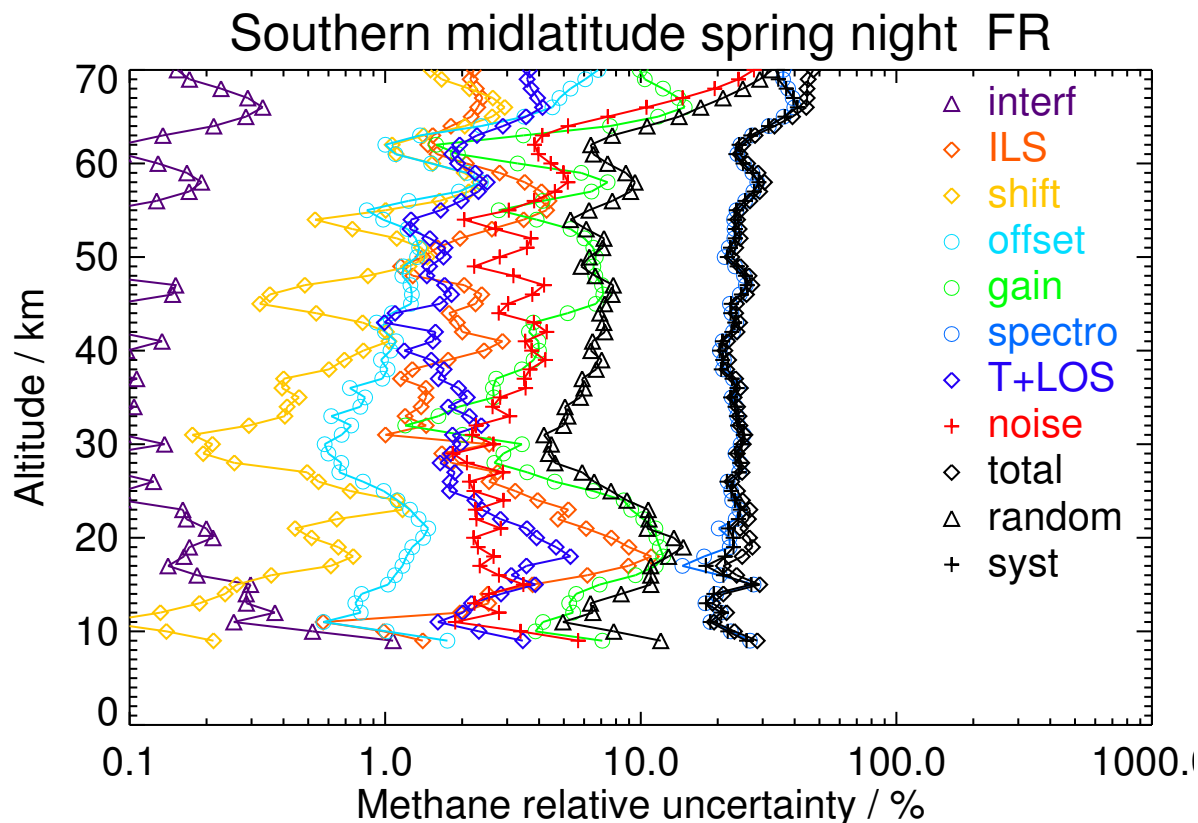

**Figure S22.** V8H\_CH4\_61 Southern midlatitude spring night



**Table S23.** Methane error budget for Southern midlatitude summer day. All uncertainties are  $1\sigma$ .

| altitude (km) | mean target (ppbv) | interf (ppbv) | ILS (ppbv) | shift (ppbv) | offset (ppbv) | gain (ppbv) | spectro (ppbv) | T+LOS (ppbv) | noise (ppbv) | random (ppbv) | syst (ppbv) | total (ppbv) |
|---------------|--------------------|---------------|------------|--------------|---------------|-------------|----------------|--------------|--------------|---------------|-------------|--------------|
| 9             | 1719.49            | 28.08         | 11.80      | 1.55         | 22.70         | 61.72       | 339.21         | 35.24        | 75.37        | 185.54        | 304.65      | 356.71       |
| 12            | 1734.08            | 6.04          | 36.21      | 1.40         | 13.61         | 110.00      | 325.80         | 32.87        | 44.20        | 120.20        | 329.19      | 350.44       |
| 15            | 1674.16            | 6.90          | 62.10      | 3.22         | 14.56         | 91.12       | 331.70         | 43.83        | 49.94        | 135.81        | 329.28      | 356.18       |
| 18            | 1451.75            | 3.32          | 52.35      | 2.89         | 10.83         | 57.70       | 322.32         | 42.21        | 42.60        | 113.21        | 317.61      | 337.19       |
| 21            | 1140.79            | 2.11          | 72.60      | 3.98         | 10.69         | 39.95       | 294.10         | 33.41        | 40.69        | 73.04         | 301.55      | 310.27       |
| 24            | 1141.91            | 1.35          | 62.15      | 6.24         | 8.64          | 21.46       | 286.57         | 26.20        | 37.97        | 57.04         | 292.29      | 297.81       |
| 27            | 1046.88            | 1.27          | 34.27      | 4.45         | 7.38          | 13.68       | 255.89         | 19.93        | 35.26        | 55.77         | 255.83      | 261.84       |
| 30            | 1027.27            | 1.68          | 28.48      | 2.95         | 6.41          | 24.17       | 249.06         | 18.14        | 31.97        | 49.75         | 249.71      | 254.61       |
| 33            | 845.38             | 1.18          | 21.59      | 4.58         | 5.66          | 19.25       | 178.85         | 12.58        | 26.57        | 34.32         | 180.46      | 183.69       |
| 36            | 717.95             | 0.60          | 6.11       | 1.96         | 4.99          | 9.90        | 149.09         | 9.32         | 22.81        | 28.88         | 148.88      | 151.66       |
| 39            | 563.70             | 0.80          | 16.19      | 3.27         | 4.52          | 15.82       | 120.13         | 6.70         | 19.79        | 27.43         | 121.08      | 124.15       |
| 42            | 418.22             | 0.35          | 5.91       | 3.10         | 3.22          | 9.32        | 105.85         | 5.48         | 19.11        | 26.56         | 105.06      | 108.36       |
| 45            | 367.19             | 0.72          | 24.82      | 4.25         | 5.85          | 37.36       | 83.28          | 7.94         | 16.78        | 34.37         | 90.35       | 96.67        |
| 48            | 270.33             | 0.23          | 6.20       | 2.36         | 3.20          | 21.30       | 69.68          | 3.38         | 8.11         | 23.99         | 69.75       | 73.76        |
| 52            | 201.17             | 0.19          | 3.93       | 2.04         | 2.84          | 13.86       | 51.77          | 2.98         | 10.80        | 25.83         | 48.56       | 55.01        |
| 56            | 165.75             | 0.27          | 5.62       | 2.91         | 2.38          | 8.14        | 44.58          | 3.29         | 10.77        | 21.37         | 42.06       | 47.18        |
| 60            | 177.06             | 0.16          | 3.53       | 2.66         | 1.44          | 3.50        | 42.48          | 2.71         | 6.59         | 17.38         | 39.83       | 43.46        |
| 64            | 164.90             | 0.27          | 1.16       | 3.03         | 2.94          | 10.16       | 57.27          | 2.62         | 7.79         | 14.70         | 57.05       | 58.91        |
| 68            | 196.43             | 0.19          | 2.89       | 2.62         | 3.84          | 6.38        | 54.71          | 3.63         | 16.56        | 19.76         | 54.41       | 57.89        |

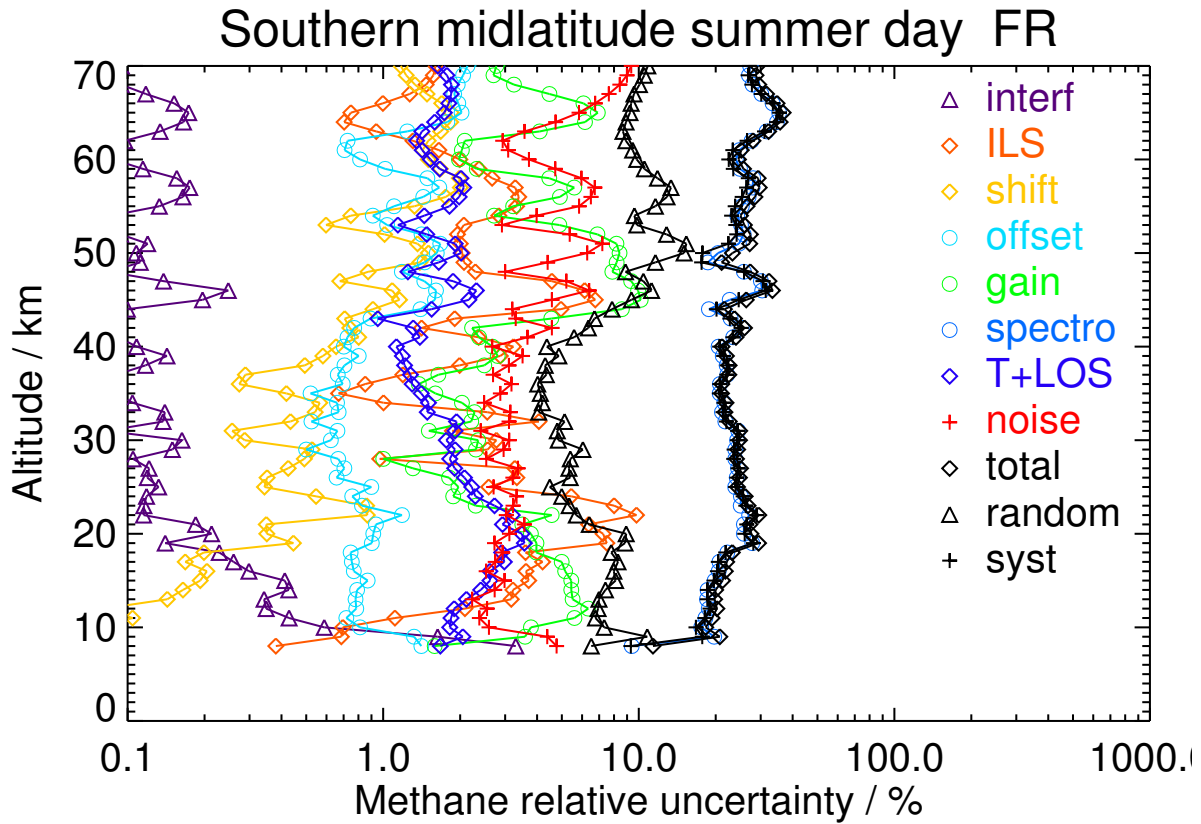

**Figure S23.** V8H\_CH4\_61 Southern midlatitude summer day



**Table S24.** Methane error budget for Southern midlatitude summer night. All uncertainties are  $1\sigma$ .

| altitude (km) | mean target (ppbv) | interf (ppbv) | ILS (ppbv) | shift (ppbv) | offset (ppbv) | gain (ppbv) | spectro (ppbv) | T+LOS (ppbv) | noise (ppbv) | random (ppbv) | syst (ppbv) | total (ppbv) |
|---------------|--------------------|---------------|------------|--------------|---------------|-------------|----------------|--------------|--------------|---------------|-------------|--------------|
| 9             | 1717.87            | 29.72         | 14.89      | 1.82         | 22.51         | 64.43       | 331.56         | 34.49        | 69.65        | 186.26        | 295.04      | 348.91       |
| 12            | 1740.90            | 6.08          | 39.84      | 1.66         | 16.43         | 98.89       | 391.05         | 37.55        | 44.92        | 108.48        | 395.29      | 409.91       |
| 15            | 1801.29            | 6.19          | 103.78     | 4.85         | 18.50         | 137.07      | 369.56         | 54.46        | 52.91        | 133.65        | 392.99      | 415.09       |
| 18            | 1621.47            | 3.02          | 128.33     | 4.19         | 17.18         | 136.65      | 331.64         | 53.93        | 41.53        | 181.50        | 342.26      | 387.40       |
| 21            | 1241.11            | 2.31          | 70.11      | 6.92         | 11.08         | 45.60       | 291.16         | 30.29        | 37.78        | 101.58        | 289.78      | 307.07       |
| 24            | 1100.45            | 1.38          | 55.24      | 5.29         | 9.16          | 25.89       | 273.85         | 24.70        | 35.53        | 61.30         | 277.39      | 284.08       |
| 27            | 1087.19            | 1.38          | 32.45      | 5.40         | 7.99          | 17.70       | 254.17         | 20.65        | 34.04        | 60.11         | 253.05      | 260.09       |
| 30            | 992.91             | 1.51          | 26.15      | 3.09         | 6.60          | 22.21       | 253.09         | 18.74        | 30.94        | 50.44         | 253.09      | 258.06       |
| 33            | 854.29             | 1.16          | 24.52      | 4.50         | 5.80          | 20.45       | 187.02         | 13.53        | 26.06        | 37.26         | 188.48      | 192.13       |
| 36            | 709.58             | 0.73          | 5.96       | 1.60         | 4.99          | 9.64        | 152.54         | 9.42         | 22.69        | 28.91         | 152.29      | 155.01       |
| 39            | 586.63             | 0.71          | 15.18      | 2.60         | 4.45          | 13.04       | 124.22         | 7.06         | 20.39        | 27.79         | 124.71      | 127.77       |
| 42            | 433.33             | 0.41          | 7.73       | 3.58         | 3.52          | 15.69       | 115.77         | 5.81         | 19.06        | 29.24         | 115.22      | 118.87       |
| 45            | 354.91             | 0.74          | 22.82      | 3.82         | 5.66          | 37.22       | 91.92          | 7.84         | 17.66        | 36.67         | 97.12       | 103.81       |
| 48            | 253.37             | 0.25          | 7.24       | 2.22         | 2.87          | 18.73       | 67.19          | 3.08         | 9.35         | 22.99         | 67.08       | 70.91        |
| 52            | 187.83             | 0.19          | 3.72       | 2.09         | 2.71          | 13.09       | 47.83          | 2.76         | 11.54        | 22.07         | 46.24       | 51.24        |
| 56            | 146.76             | 0.29          | 5.52       | 3.41         | 2.98          | 13.86       | 38.56          | 3.87         | 11.69        | 19.59         | 38.69       | 43.37        |
| 60            | 164.84             | 0.15          | 2.90       | 2.66         | 1.35          | 3.18        | 39.22          | 2.65         | 6.28         | 16.89         | 36.43       | 40.15        |
| 64            | 167.26             | 0.28          | 1.42       | 2.60         | 2.75          | 10.74       | 48.69          | 2.53         | 7.16         | 15.00         | 48.32       | 50.60        |
| 68            | 177.02             | 0.17          | 1.63       | 2.12         | 3.32          | 5.86        | 46.58          | 3.74         | 14.47        | 17.22         | 46.36       | 49.45        |

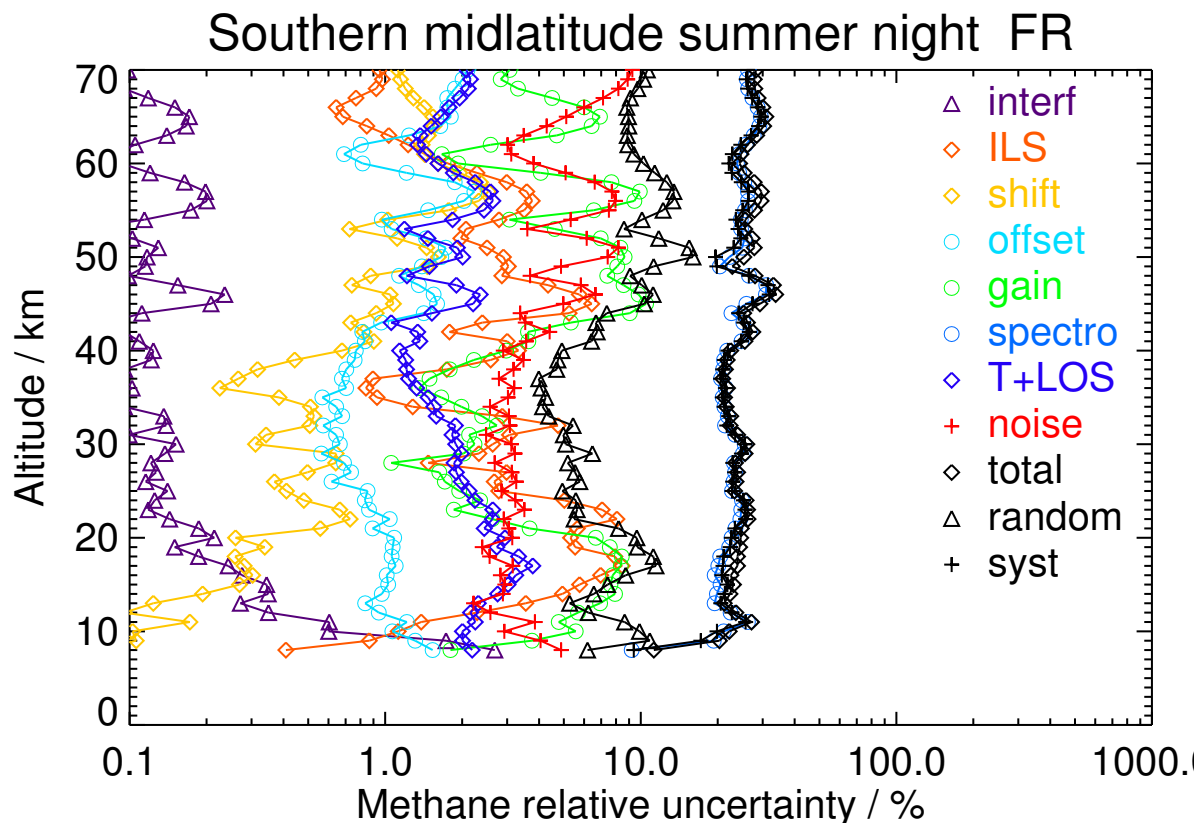

**Figure S24.** V8H\_CH4\_61 Southern midlatitude summer night

**Table S25.** Methane error budget for Southern midlatitude autumn day. All uncertainties are  $1\sigma$ .

| altitude<br>(km) | mean target<br>(ppbv) | interf<br>(ppbv) | ILS<br>(ppbv) | shift<br>(ppbv) | offset<br>(ppbv) | gain<br>(ppbv) | spectro<br>(ppbv) | T+LOS<br>(ppbv) | noise<br>(ppbv) | random<br>(ppbv) | syst<br>(ppbv) | total<br>(ppbv) |
|------------------|-----------------------|------------------|---------------|-----------------|------------------|----------------|-------------------|-----------------|-----------------|------------------|----------------|-----------------|
| 12               | 1782.34               | 4.07             | 30.41         | 1.47            | 12.74            | 92.12          | 340.86            | 32.88           | 36.38           | 81.38            | 348.65         | 358.03          |
| 15               | 1711.88               | 4.36             | 62.44         | 4.03            | 15.26            | 88.94          | 340.18            | 44.52           | 45.72           | 119.48           | 342.92         | 363.14          |
| 18               | 1606.85               | 1.83             | 54.48         | 4.46            | 19.67            | 136.79         | 319.51            | 35.66           | 35.91           | 125.72           | 333.06         | 356.00          |
| 21               | 1262.38               | 1.69             | 64.21         | 12.34           | 15.15            | 76.61          | 327.16            | 28.52           | 32.40           | 103.68           | 329.43         | 345.36          |
| 24               | 1170.47               | 1.28             | 29.90         | 2.97            | 13.03            | 53.92          | 282.75            | 23.34           | 31.07           | 79.41            | 281.31         | 292.30          |
| 27               | 1023.92               | 1.10             | 12.06         | 4.94            | 9.82             | 16.95          | 242.14            | 20.04           | 29.88           | 54.83            | 239.74         | 245.93          |
| 30               | 981.39                | 0.84             | 19.49         | 3.19            | 7.83             | 21.39          | 239.68            | 20.17           | 25.41           | 48.47            | 238.87         | 243.74          |
| 33               | 811.19                | 0.56             | 8.40          | 3.60            | 7.49             | 21.75          | 189.28            | 14.74           | 23.42           | 46.22            | 187.27         | 192.89          |
| 36               | 650.85                | 0.45             | 7.02          | 2.55            | 6.41             | 25.96          | 153.10            | 10.64           | 21.48           | 46.86            | 150.30         | 157.43          |
| 39               | 540.85                | 0.39             | 15.32         | 4.08            | 6.57             | 26.28          | 129.51            | 8.39            | 20.19           | 50.25            | 125.34         | 135.04          |
| 42               | 465.37                | 0.31             | 16.93         | 2.04            | 5.82             | 29.17          | 116.80            | 5.75            | 14.69           | 49.44            | 112.35         | 122.75          |
| 45               | 382.98                | 0.71             | 15.87         | 2.30            | 6.08             | 31.34          | 100.15            | 6.46            | 15.71           | 44.77            | 97.93          | 107.68          |
| 48               | 368.89                | 0.23             | 4.55          | 4.46            | 5.90             | 28.70          | 83.93             | 7.30            | 10.81           | 38.39            | 81.48          | 90.07           |
| 52               | 332.83                | 0.21             | 7.99          | 1.72            | 4.31             | 16.44          | 74.60             | 5.13            | 7.71            | 24.38            | 73.57          | 77.50           |
| 56               | 218.96                | 0.50             | 5.01          | 4.81            | 6.26             | 17.42          | 71.63             | 6.46            | 15.14           | 29.97            | 69.96          | 76.11           |
| 60               | 247.59                | 0.15             | 2.75          | 1.89            | 1.96             | 3.82           | 59.45             | 4.58            | 8.40            | 16.81            | 58.08          | 60.46           |
| 64               | 134.62                | 0.21             | 1.46          | 2.32            | 3.57             | 9.97           | 43.24             | 3.52            | 9.24            | 22.09            | 39.99          | 45.69           |
| 68               | 79.59                 | 0.07             | 1.25          | 0.40            | 3.63             | 1.75           | 24.31             | 2.47            | 15.97           | 19.15            | 22.44          | 29.50           |

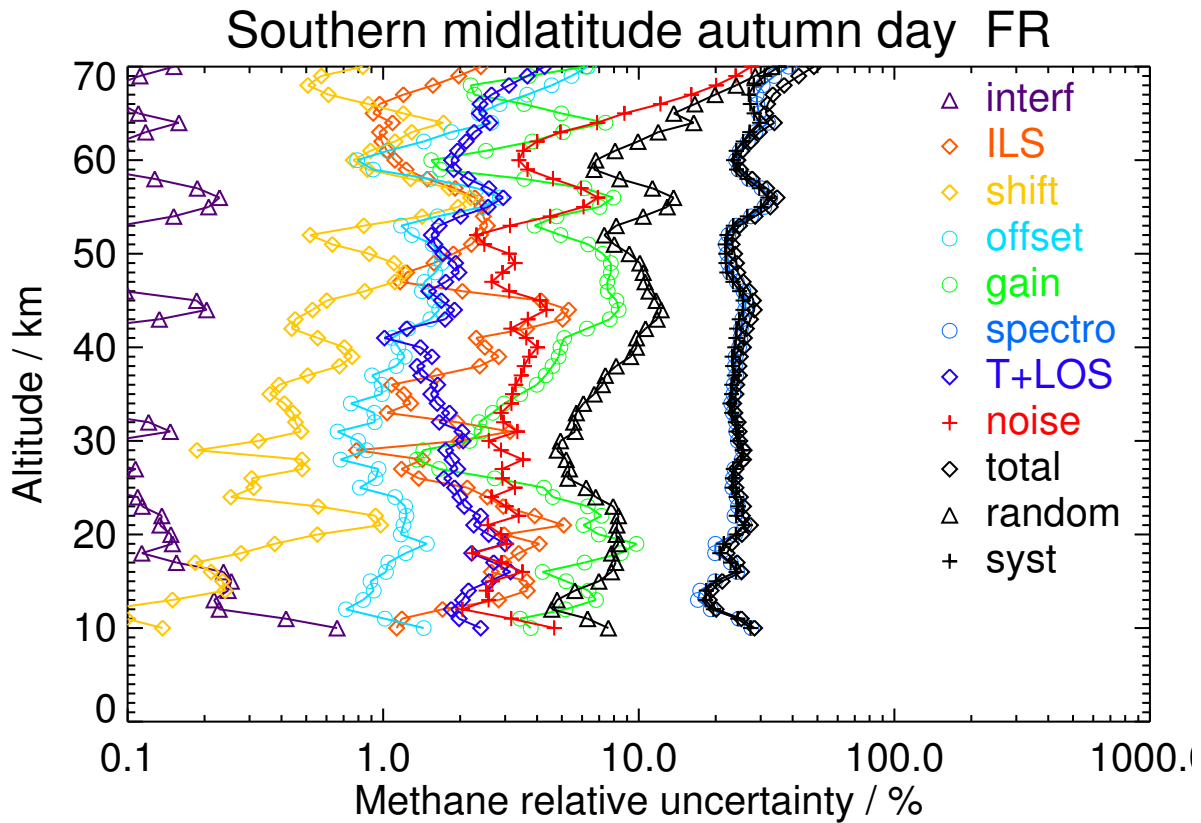

**Figure S25.** V8H\_CH4\_61 Southern midlatitude autumn day

**Table S26.** Methane error budget for Southern midlatitude autumn night. All uncertainties are  $1\sigma$ .

| altitude<br>(km) | mean target<br>(ppbv) | interf<br>(ppbv) | ILS<br>(ppbv) | shift<br>(ppbv) | offset<br>(ppbv) | gain<br>(ppbv) | spectro<br>(ppbv) | T+LOS<br>(ppbv) | noise<br>(ppbv) | random<br>(ppbv) | syst<br>(ppbv) | total<br>(ppbv) |
|------------------|-----------------------|------------------|---------------|-----------------|------------------|----------------|-------------------|-----------------|-----------------|------------------|----------------|-----------------|
| 12               | 1819.62               | 4.94             | 42.94         | 1.79            | 15.45            | 121.26         | 353.98            | 37.14           | 39.93           | 82.34            | 371.90         | 380.90          |
| 15               | 1769.79               | 4.90             | 57.28         | 3.53            | 14.20            | 74.16          | 358.43            | 45.64           | 46.60           | 96.81            | 363.83         | 376.49          |
| 18               | 1715.79               | 2.35             | 47.67         | 5.38            | 22.58            | 155.32         | 311.50            | 37.75           | 35.88           | 110.05           | 338.49         | 355.94          |
| 21               | 1259.34               | 1.88             | 75.59         | 13.31           | 16.37            | 78.67          | 314.08            | 31.97           | 34.00           | 107.36           | 318.83         | 336.42          |
| 24               | 1172.69               | 1.39             | 20.18         | 2.46            | 11.89            | 34.00          | 274.32            | 23.99           | 32.01           | 62.54            | 273.22         | 280.29          |
| 27               | 1031.80               | 1.23             | 11.98         | 5.78            | 9.37             | 15.01          | 236.01            | 20.30           | 29.76           | 48.91            | 234.73         | 239.77          |
| 30               | 987.22                | 0.82             | 20.90         | 3.44            | 7.54             | 22.59          | 231.90            | 19.68           | 24.91           | 48.72            | 231.14         | 236.22          |
| 33               | 804.90                | 0.55             | 8.50          | 3.98            | 7.12             | 18.33          | 173.61            | 14.73           | 22.64           | 44.74            | 171.30         | 177.05          |
| 36               | 703.98                | 0.51             | 6.13          | 2.15            | 6.25             | 21.21          | 143.78            | 10.22           | 21.41           | 46.78            | 139.93         | 147.54          |
| 39               | 580.40                | 0.60             | 16.05         | 4.42            | 5.66             | 16.65          | 115.49            | 7.96            | 19.01           | 44.98            | 111.02         | 119.79          |
| 42               | 471.14                | 0.29             | 10.06         | 2.29            | 5.06             | 22.76          | 111.09            | 4.92            | 13.97           | 45.46            | 105.57         | 114.94          |
| 45               | 437.34                | 0.72             | 13.03         | 1.63            | 5.79             | 30.73          | 111.12            | 7.59            | 17.45           | 43.74            | 109.30         | 117.73          |
| 48               | 357.56                | 0.27             | 4.96          | 5.05            | 5.23             | 27.63          | 86.55             | 6.36            | 10.84           | 42.45            | 81.78          | 92.14           |
| 52               | 311.18                | 0.13             | 10.26         | 1.34            | 3.74             | 14.48          | 70.75             | 4.49            | 7.15            | 23.06            | 69.82          | 73.53           |
| 56               | 271.89                | 0.46             | 6.03          | 5.27            | 6.02             | 19.01          | 73.99             | 6.48            | 12.82           | 28.73            | 72.92          | 78.37           |
| 60               | 244.38                | 0.16             | 2.56          | 2.46            | 2.06             | 4.36           | 59.59             | 4.74            | 8.04            | 17.56            | 58.01          | 60.61           |
| 64               | 166.43                | 0.20             | 2.49          | 2.27            | 3.70             | 10.55          | 46.24             | 4.39            | 9.51            | 20.09            | 44.50          | 48.83           |
| 68               | 91.19                 | 0.09             | 1.96          | 0.63            | 3.69             | 3.58           | 29.34             | 3.10            | 16.26           | 22.05            | 26.06          | 34.14           |

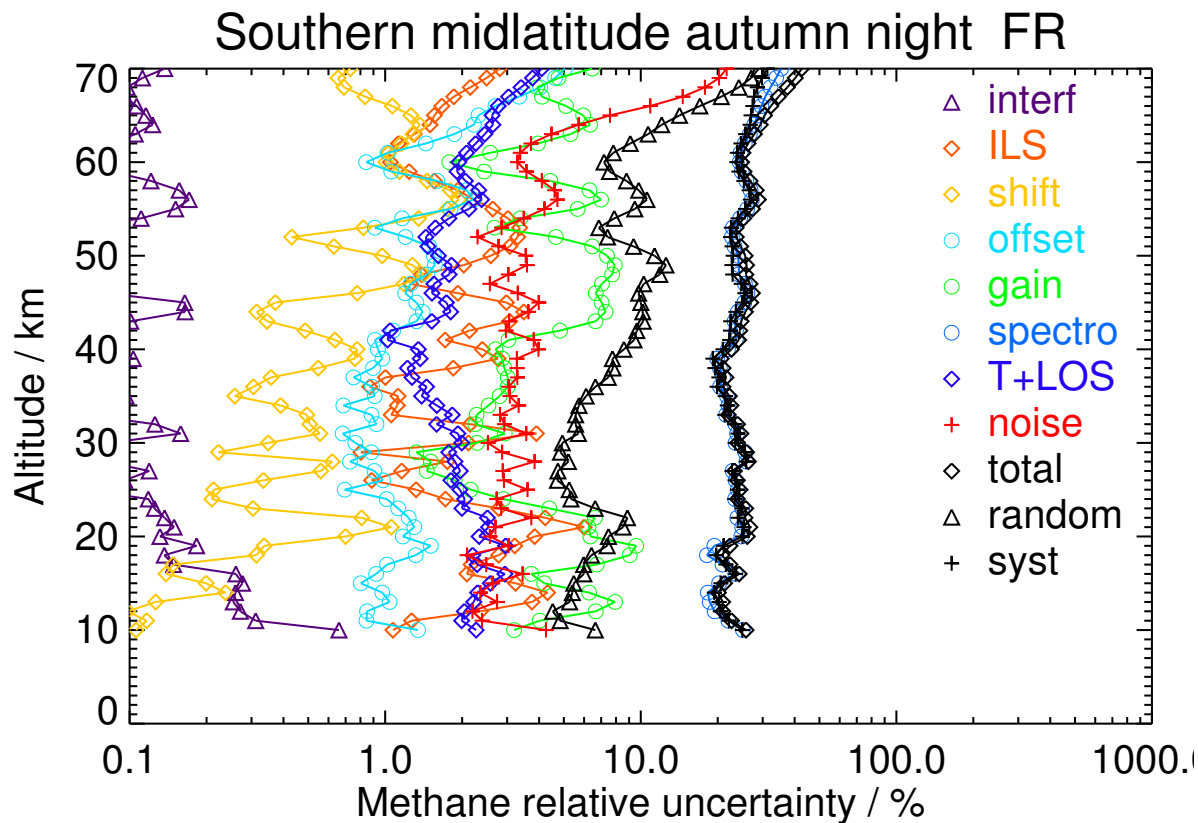

**Figure S26.** V8H\_CH4\_61 Southern midlatitude autumn night

**Table S27.** Methane error budget for Southern polar winter day. All uncertainties are  $1\sigma$ .

| altitude (km) | mean target (ppbv) | interf (ppbv) | ILS (ppbv) | shift (ppbv) | offset (ppbv) | gain (ppbv) | spectro (ppbv) | T+LOS (ppbv) | noise (ppbv) | random (ppbv) | syst (ppbv) | total (ppbv) |
|---------------|--------------------|---------------|------------|--------------|---------------|-------------|----------------|--------------|--------------|---------------|-------------|--------------|
| 9             | 1728.40            | 30.76         | 8.41       | 1.45         | 31.97         | 58.62       | 338.44         | 53.37        | 78.99        | 153.19        | 325.03      | 359.32       |
| 12            | 1724.98            | 11.68         | 12.74      | 3.07         | 26.54         | 70.68       | 376.69         | 63.00        | 67.94        | 113.90        | 378.83      | 395.59       |
| 15            | 1428.49            | 13.50         | 17.89      | 4.87         | 24.52         | 58.99       | 293.74         | 62.17        | 71.02        | 112.01        | 295.38      | 315.91       |
| 18            | 1145.75            | 5.20          | 21.27      | 5.92         | 18.49         | 49.68       | 281.88         | 46.10        | 51.55        | 92.96         | 280.93      | 295.91       |
| 21            | 1013.01            | 3.38          | 15.29      | 9.39         | 15.05         | 47.33       | 251.07         | 31.15        | 48.67        | 79.02         | 250.86      | 263.01       |
| 24            | 561.82             | 1.12          | 10.90      | 2.98         | 9.02          | 15.39       | 164.02         | 20.64        | 42.34        | 65.53         | 158.98      | 171.95       |
| 27            | 384.09             | 1.09          | 9.40       | 2.07         | 8.84          | 5.61        | 93.54          | 13.03        | 35.78        | 48.53         | 89.72       | 102.00       |
| 30            | 413.56             | 0.80          | 12.28      | 1.44         | 8.01          | 6.68        | 102.74         | 11.85        | 31.55        | 44.01         | 100.08      | 109.33       |
| 33            | 276.06             | 0.57          | 6.63       | 1.75         | 6.51          | 4.61        | 69.54          | 7.78         | 29.33        | 37.46         | 66.82       | 76.61        |
| 36            | 199.63             | 0.42          | 3.54       | 2.67         | 4.72          | 4.06        | 48.24          | 5.16         | 23.83        | 28.07         | 46.82       | 54.59        |
| 39            | 172.33             | 0.31          | 4.06       | 1.17         | 3.26          | 5.50        | 39.76          | 3.73         | 17.08        | 20.40         | 39.11       | 44.11        |
| 42            | 183.35             | 0.30          | 2.06       | 1.35         | 3.01          | 4.26        | 47.54          | 3.31         | 16.87        | 20.84         | 46.42       | 50.88        |
| 45            | 209.31             | 0.36          | 3.65       | 2.16         | 3.43          | 12.17       | 44.17          | 4.83         | 14.04        | 20.70         | 43.83       | 48.47        |
| 48            | 211.27             | 0.20          | 2.06       | 1.27         | 1.82          | 6.71        | 50.91          | 1.96         | 7.84         | 13.77         | 50.21       | 52.07        |
| 52            | 202.83             | 0.24          | 2.97       | 2.25         | 3.13          | 11.91       | 43.80          | 2.78         | 10.87        | 16.67         | 43.95       | 47.01        |
| 56            | 147.31             | 0.34          | 5.92       | 3.20         | 3.67          | 10.22       | 48.02          | 3.28         | 11.18        | 20.63         | 46.69       | 51.04        |
| 60            | 124.37             | 0.16          | 1.65       | 1.27         | 2.31          | 4.58        | 33.05          | 2.12         | 9.07         | 13.76         | 31.94       | 34.78        |
| 64            | 86.43              | 0.27          | 1.73       | 1.65         | 2.24          | 5.77        | 29.59          | 2.05         | 8.49         | 14.09         | 28.24       | 31.56        |
| 68            | 56.37              | 0.25          | 1.74       | 1.58         | 4.96          | 6.23        | 23.47          | 1.91         | 21.64        | 24.92         | 21.70       | 33.04        |

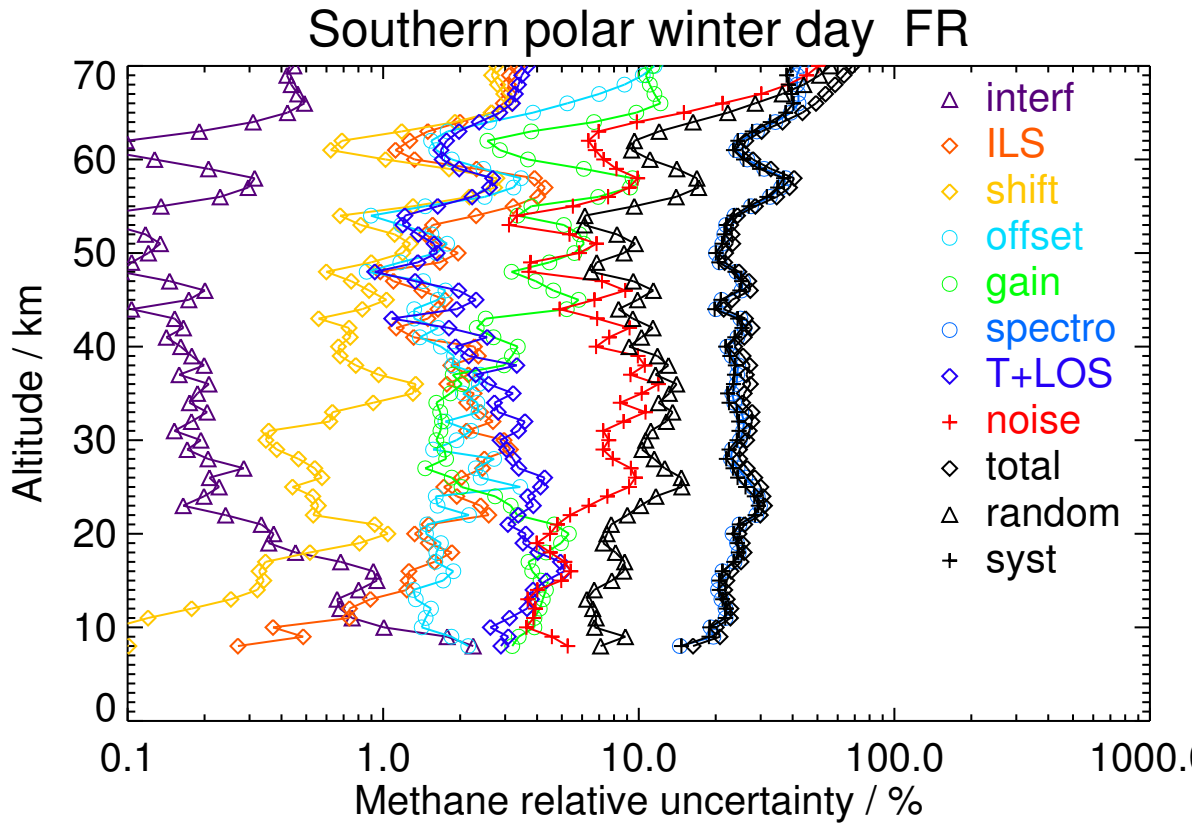

**Figure S27.** V8H\_CH4\_61 Southern polar winter day

**Table S28.** Methane error budget for Southern polar winter night. All uncertainties are  $1\sigma$ .

| altitude (km) | mean target (ppbv) | interf (ppbv) | ILS (ppbv) | shift (ppbv) | offset (ppbv) | gain (ppbv) | spectro (ppbv) | T+LOS (ppbv) | noise (ppbv) | random (ppbv) | syst (ppbv) | total (ppbv) |
|---------------|--------------------|---------------|------------|--------------|---------------|-------------|----------------|--------------|--------------|---------------|-------------|--------------|
| 9             | 1690.76            | 27.07         | 5.47       | 1.12         | 28.33         | 56.94       | 222.13         | 39.30        | 71.68        | 110.27        | 220.62      | 246.64       |
| 12            | 1722.99            | 9.80          | 20.73      | 2.26         | 20.49         | 57.42       | 310.91         | 47.30        | 53.24        | 94.20         | 311.62      | 325.55       |
| 15            | 1442.18            | 12.34         | 30.14      | 3.97         | 21.79         | 53.33       | 233.88         | 54.43        | 62.36        | 107.76        | 233.10      | 256.80       |
| 18            | 1163.56            | 4.53          | 23.28      | 4.36         | 16.62         | 41.48       | 237.68         | 37.40        | 46.79        | 84.88         | 235.49      | 250.32       |
| 21            | 1011.86            | 2.39          | 14.40      | 8.81         | 15.83         | 44.88       | 208.47         | 28.52        | 46.10        | 70.66         | 209.67      | 221.26       |
| 24            | 724.71             | 0.97          | 14.50      | 4.20         | 11.85         | 22.59       | 188.07         | 23.04        | 44.21        | 68.29         | 184.58      | 196.81       |
| 27            | 415.03             | 0.93          | 7.58       | 2.08         | 9.78          | 7.79        | 108.80         | 16.03        | 38.86        | 59.98         | 101.12      | 117.57       |
| 30            | 347.57             | 0.66          | 10.76      | 1.43         | 7.84          | 4.48        | 88.47          | 11.29        | 32.09        | 46.34         | 83.89       | 95.83        |
| 33            | 314.99             | 0.38          | 5.06       | 1.68         | 6.56          | 5.84        | 77.32          | 9.12         | 29.60        | 38.85         | 74.39       | 83.92        |
| 36            | 230.68             | 0.35          | 5.34       | 2.57         | 4.78          | 6.08        | 61.55          | 6.32         | 24.51        | 31.77         | 59.28       | 67.26        |
| 39            | 197.35             | 0.33          | 4.16       | 1.34         | 3.38          | 7.58        | 50.18          | 4.60         | 19.11        | 24.94         | 48.69       | 54.71        |
| 42            | 168.55             | 0.33          | 2.81       | 1.76         | 3.23          | 5.55        | 43.59          | 3.94         | 18.24        | 23.48         | 41.83       | 47.96        |
| 45            | 177.87             | 0.26          | 2.75       | 1.73         | 3.25          | 10.33       | 39.86          | 4.39         | 13.76        | 18.82         | 39.63       | 43.88        |
| 48            | 179.91             | 0.18          | 2.77       | 1.13         | 1.90          | 5.14        | 44.39          | 1.86         | 9.36         | 14.50         | 43.48       | 45.84        |
| 52            | 154.77             | 0.23          | 3.37       | 1.87         | 3.03          | 9.49        | 36.84          | 2.19         | 11.18        | 15.90         | 36.72       | 40.02        |
| 56            | 138.40             | 0.25          | 4.45       | 2.45         | 2.73          | 7.65        | 36.97          | 2.37         | 9.22         | 17.31         | 35.35       | 39.36        |
| 60            | 108.97             | 0.17          | 1.84       | 1.40         | 2.34          | 5.29        | 29.22          | 1.97         | 8.95         | 15.32         | 27.24       | 31.25        |
| 64            | 78.92              | 0.20          | 1.23       | 1.17         | 1.83          | 3.17        | 25.45          | 1.96         | 8.16         | 11.83         | 24.39       | 27.11        |
| 68            | 55.22              | 0.22          | 1.79       | 1.17         | 4.83          | 3.96        | 21.88          | 2.03         | 21.34        | 24.50         | 19.53       | 31.34        |

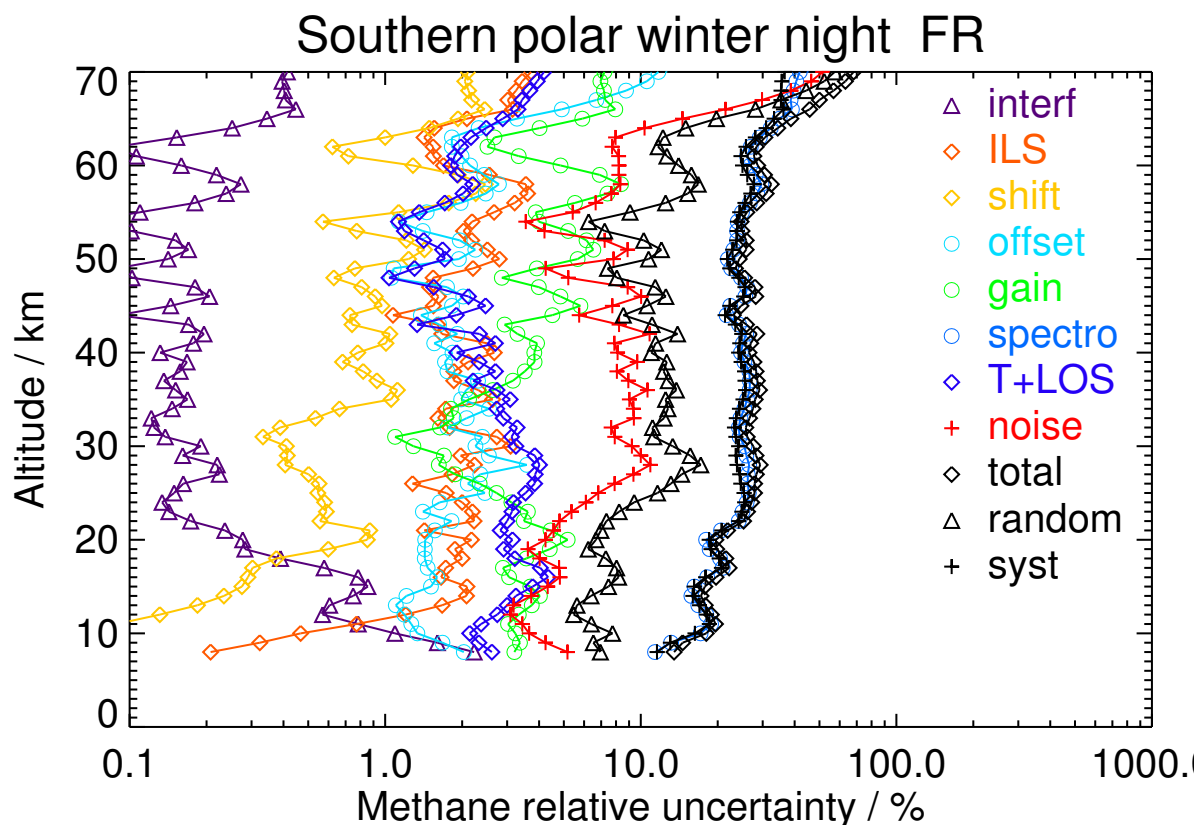

**Figure S28.** V8H\_CH4\_61 Southern polar winter night

**Table S29.** Methane error budget for Southern polar spring day. All uncertainties are  $1\sigma$ .

| altitude (km) | mean target (ppbv) | interf (ppbv) | ILS (ppbv) | shift (ppbv) | offset (ppbv) | gain (ppbv) | spectro (ppbv) | T+LOS (ppbv) | noise (ppbv) | random (ppbv) | syst (ppbv) | total (ppbv) |
|---------------|--------------------|---------------|------------|--------------|---------------|-------------|----------------|--------------|--------------|---------------|-------------|--------------|
| 9             | 1797.35            | 15.47         | 13.56      | 3.74         | 29.04         | 59.33       | 368.60         | 59.81        | 79.01        | 146.21        | 359.32      | 387.93       |
| 12            | 1816.55            | 14.84         | 83.35      | 6.86         | 22.11         | 75.34       | 305.56         | 69.67        | 65.62        | 111.98        | 321.51      | 340.46       |
| 15            | 1319.71            | 9.34          | 34.97      | 8.54         | 19.38         | 31.00       | 280.88         | 61.84        | 67.74        | 115.20        | 277.05      | 300.04       |
| 18            | 922.35             | 3.81          | 27.91      | 4.45         | 9.95          | 17.37       | 208.57         | 53.51        | 45.38        | 82.67         | 206.89      | 222.80       |
| 21            | 413.52             | 0.83          | 21.58      | 3.83         | 7.33          | 6.76        | 119.87         | 24.64        | 35.63        | 59.02         | 115.51      | 129.72       |
| 24            | 374.05             | 1.19          | 14.25      | 2.67         | 3.91          | 13.50       | 100.09         | 13.34        | 31.54        | 56.38         | 91.77       | 107.70       |
| 27            | 351.28             | 3.40          | 13.36      | 3.99         | 4.11          | 7.88        | 125.46         | 11.07        | 29.34        | 94.13         | 90.27       | 130.42       |
| 30            | 544.34             | 2.44          | 35.48      | 4.94         | 5.32          | 37.59       | 142.32         | 14.75        | 29.89        | 104.91        | 114.41      | 155.23       |
| 33            | 542.55             | 1.17          | 10.45      | 3.22         | 5.23          | 12.77       | 127.38         | 10.29        | 24.93        | 64.71         | 114.35      | 131.39       |
| 36            | 454.47             | 0.88          | 14.40      | 3.94         | 5.41          | 20.86       | 99.47          | 7.74         | 21.38        | 43.03         | 96.17       | 105.36       |
| 39            | 443.37             | 0.63          | 14.08      | 3.44         | 4.49          | 21.72       | 92.61          | 6.00         | 17.03        | 37.67         | 90.48       | 98.01        |
| 42            | 406.44             | 0.44          | 17.83      | 3.76         | 4.04          | 24.76       | 93.64          | 5.57         | 13.61        | 37.88         | 92.26       | 99.73        |
| 45            | 404.85             | 0.62          | 30.68      | 4.81         | 7.20          | 52.72       | 91.44          | 7.75         | 10.62        | 55.37         | 96.25       | 111.04       |
| 48            | 371.81             | 0.93          | 31.47      | 3.12         | 6.56          | 50.61       | 106.14         | 7.50         | 14.66        | 61.44         | 106.62      | 123.05       |
| 52            | 298.76             | 0.35          | 11.89      | 2.74         | 4.20          | 26.32       | 71.88          | 5.54         | 12.63        | 40.81         | 67.46       | 78.85        |
| 56            | 251.46             | 0.31          | 8.85       | 3.88         | 1.70          | 7.86        | 64.30          | 4.43         | 8.66         | 17.98         | 63.75       | 66.24        |
| 60            | 209.28             | 0.24          | 5.28       | 3.87         | 3.36          | 10.37       | 56.58          | 3.82         | 9.75         | 17.27         | 56.35       | 58.93        |
| 64            | 185.56             | 0.22          | 2.18       | 2.33         | 1.74          | 5.81        | 50.73          | 2.91         | 5.73         | 12.47         | 50.07       | 51.60        |
| 68            | 168.14             | 0.19          | 3.05       | 1.57         | 4.32          | 5.99        | 52.61          | 3.46         | 17.86        | 24.15         | 50.81       | 56.26        |

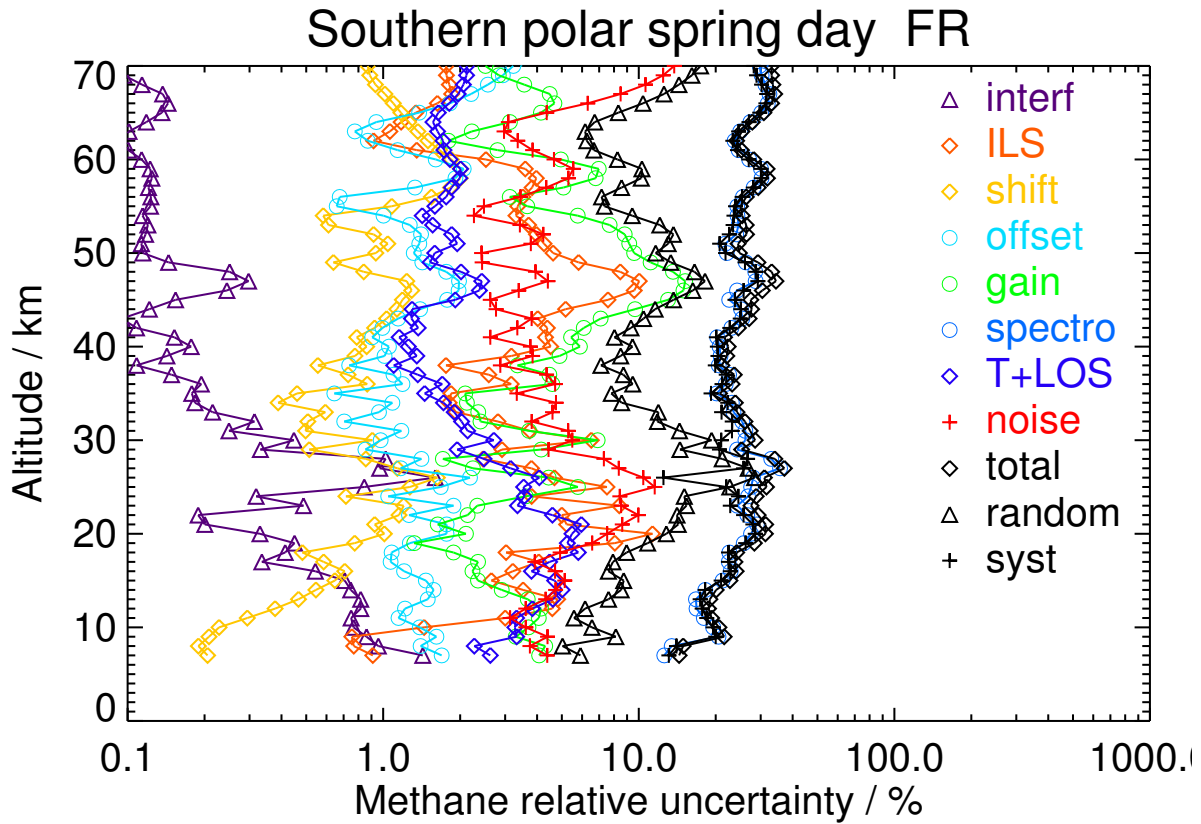

**Figure S29.** V8H\_CH4\_61 Southern polar spring day

**Table S30.** Methane error budget for Southern polar spring night. All uncertainties are  $1\sigma$ .

| altitude (km) | mean target (ppbv) | interf (ppbv) | ILS (ppbv) | shift (ppbv) | offset (ppbv) | gain (ppbv) | spectro (ppbv) | T+LOS (ppbv) | noise (ppbv) | random (ppbv) | syst (ppbv) | total (ppbv) |
|---------------|--------------------|---------------|------------|--------------|---------------|-------------|----------------|--------------|--------------|---------------|-------------|--------------|
| 9             | 1761.25            | 11.06         | 13.96      | 2.22         | 27.95         | 51.32       | 402.46         | 56.19        | 75.58        | 129.06        | 397.40      | 417.83       |
| 12            | 1787.98            | 8.98          | 83.24      | 7.60         | 18.55         | 79.85       | 300.54         | 55.37        | 57.31        | 126.16        | 307.48      | 332.35       |
| 15            | 1289.57            | 6.26          | 50.92      | 7.69         | 18.15         | 51.08       | 298.53         | 54.42        | 61.14        | 125.82        | 292.60      | 318.51       |
| 18            | 1032.05            | 3.85          | 40.18      | 7.26         | 12.23         | 43.20       | 217.62         | 57.44        | 49.19        | 108.15        | 212.32      | 238.28       |
| 21            | 771.05             | 1.49          | 55.78      | 8.18         | 9.68          | 24.22       | 193.04         | 32.52        | 43.02        | 94.69         | 187.27      | 209.85       |
| 24            | 677.11             | 1.05          | 50.21      | 9.23         | 7.26          | 50.51       | 210.74         | 20.70        | 38.36        | 151.45        | 169.07      | 226.98       |
| 27            | 624.46             | 3.86          | 29.99      | 6.78         | 6.81          | 29.32       | 203.82         | 17.22        | 36.36        | 133.46        | 164.97      | 212.19       |
| 30            | 602.15             | 1.62          | 30.18      | 4.50         | 6.67          | 25.33       | 179.51         | 17.09        | 31.81        | 113.74        | 149.04      | 187.48       |
| 33            | 551.20             | 1.54          | 19.06      | 3.69         | 6.63          | 14.50       | 144.56         | 13.57        | 28.45        | 76.01         | 129.41      | 150.08       |
| 36            | 446.51             | 0.81          | 10.08      | 2.76         | 5.54          | 18.11       | 110.81         | 8.46         | 23.15        | 49.30         | 104.52      | 115.57       |
| 39            | 414.26             | 0.66          | 16.62      | 2.95         | 5.05          | 25.69       | 102.32         | 6.68         | 18.87        | 44.74         | 99.19       | 108.82       |
| 42            | 392.04             | 0.59          | 14.75      | 3.12         | 5.09          | 26.49       | 99.22          | 6.60         | 16.50        | 40.94         | 97.15       | 105.43       |
| 45            | 362.45             | 0.40          | 11.08      | 2.00         | 4.47          | 27.30       | 78.08          | 5.50         | 11.74        | 34.27         | 77.34       | 84.59        |
| 48            | 328.12             | 0.55          | 10.76      | 2.10         | 4.59          | 25.85       | 82.37          | 4.30         | 12.28        | 39.23         | 78.90       | 88.11        |
| 52            | 301.50             | 0.31          | 6.19       | 2.41         | 3.55          | 15.27       | 69.14          | 4.43         | 12.78        | 26.38         | 67.51       | 72.48        |
| 56            | 239.49             | 0.32          | 7.51       | 4.37         | 2.85          | 11.73       | 59.15          | 4.50         | 9.61         | 18.92         | 58.94       | 61.90        |
| 60            | 186.56             | 0.27          | 3.58       | 3.71         | 3.75          | 10.93       | 47.85          | 3.74         | 9.96         | 16.85         | 47.74       | 50.63        |
| 64            | 143.46             | 0.25          | 2.48       | 2.29         | 2.20          | 7.14        | 40.86          | 3.09         | 6.84         | 14.82         | 39.67       | 42.35        |
| 68            | 98.53              | 0.23          | 2.71       | 1.96         | 4.77          | 9.88        | 35.77          | 3.41         | 18.53        | 24.11         | 34.42       | 42.02        |

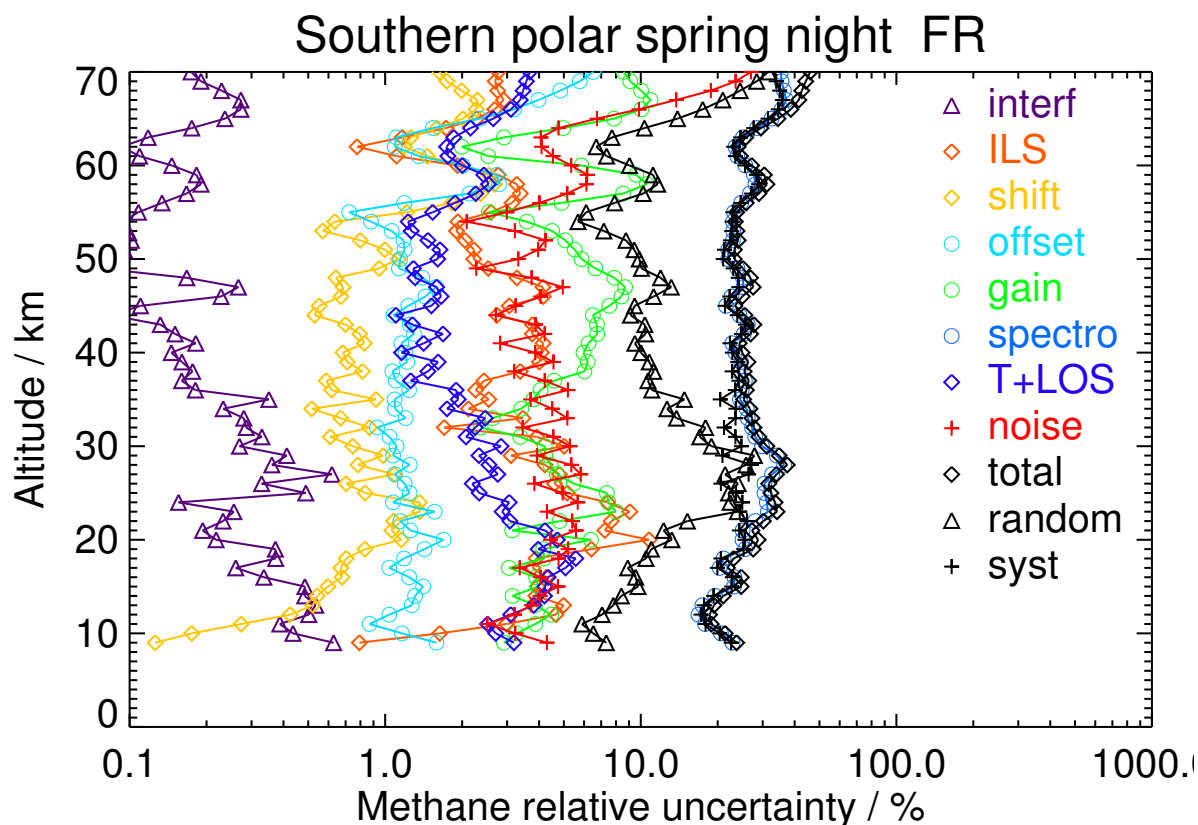

**Figure S30.** V8H\_CH4\_61 Southern polar spring night



**Table S31.** Methane error budget for Southern polar summer day. All uncertainties are  $1\sigma$ .

| altitude (km) | mean target (ppbv) | interf (ppbv) | ILS (ppbv) | shift (ppbv) | offset (ppbv) | gain (ppbv) | spectro (ppbv) | T+LOS (ppbv) | noise (ppbv) | random (ppbv) | syst (ppbv) | total (ppbv) |
|---------------|--------------------|---------------|------------|--------------|---------------|-------------|----------------|--------------|--------------|---------------|-------------|--------------|
| 9             | 1633.37            | 22.02         | 10.61      | 1.23         | 22.40         | 80.90       | 298.06         | 38.26        | 76.09        | 164.07        | 277.16      | 322.08       |
| 12            | 1682.41            | 3.54          | 23.11      | 1.59         | 10.43         | 65.17       | 343.54         | 24.38        | 37.58        | 71.12         | 346.22      | 353.45       |
| 15            | 1524.37            | 6.52          | 58.27      | 3.15         | 13.17         | 83.77       | 336.50         | 39.97        | 43.90        | 130.16        | 332.34      | 356.92       |
| 18            | 1298.59            | 2.25          | 56.76      | 3.11         | 11.67         | 61.27       | 306.42         | 43.30        | 41.22        | 107.17        | 305.14      | 323.41       |
| 21            | 1154.51            | 2.02          | 42.51      | 4.32         | 9.16          | 40.02       | 298.94         | 30.99        | 41.91        | 83.76         | 297.63      | 309.19       |
| 24            | 1132.88            | 1.08          | 59.51      | 11.57        | 7.84          | 32.44       | 297.34         | 26.93        | 41.61        | 76.72         | 299.62      | 309.29       |
| 27            | 961.75             | 0.93          | 54.00      | 5.74         | 8.29          | 34.61       | 257.33         | 22.62        | 40.28        | 61.26         | 262.33      | 269.38       |
| 30            | 917.73             | 2.30          | 32.09      | 3.79         | 6.16          | 14.50       | 228.18         | 20.57        | 37.26        | 53.90         | 228.62      | 234.89       |
| 33            | 798.29             | 1.18          | 35.05      | 3.64         | 5.38          | 22.21       | 166.92         | 14.31        | 30.81        | 40.32         | 170.75      | 175.44       |
| 36            | 672.96             | 0.85          | 10.26      | 1.97         | 5.00          | 14.17       | 146.23         | 9.87         | 25.18        | 36.97         | 145.21      | 149.84       |
| 39            | 508.98             | 0.79          | 15.89      | 2.90         | 4.69          | 18.52       | 116.80         | 7.69         | 22.63        | 29.55         | 118.18      | 121.82       |
| 42            | 350.61             | 0.42          | 8.33       | 3.09         | 3.21          | 7.56        | 94.40          | 6.64         | 21.19        | 27.56         | 93.76       | 97.73        |
| 45            | 290.44             | 0.46          | 22.96      | 4.79         | 4.70          | 29.76       | 51.62          | 5.76         | 14.87        | 25.93         | 60.86       | 66.16        |
| 48            | 181.84             | 0.31          | 5.48       | 0.99         | 2.48          | 11.91       | 66.13          | 2.84         | 12.76        | 22.99         | 64.77       | 68.73        |
| 52            | 153.86             | 0.40          | 4.00       | 1.95         | 3.38          | 14.11       | 40.45          | 3.22         | 18.24        | 24.61         | 40.04       | 47.00        |
| 56            | 72.77              | 0.30          | 5.31       | 1.62         | 2.32          | 8.12        | 22.31          | 2.78         | 12.56        | 16.18         | 22.44       | 27.66        |
| 60            | 95.85              | 0.22          | 3.25       | 1.32         | 1.46          | 3.43        | 21.12          | 1.42         | 6.68         | 10.89         | 20.00       | 22.77        |
| 64            | 111.35             | 0.31          | 1.03       | 2.82         | 1.85          | 7.27        | 38.88          | 1.68         | 5.93         | 10.42         | 38.82       | 40.19        |
| 68            | 150.25             | 0.25          | 1.49       | 2.75         | 2.74          | 6.12        | 42.84          | 2.37         | 10.95        | 13.80         | 42.72       | 44.89        |

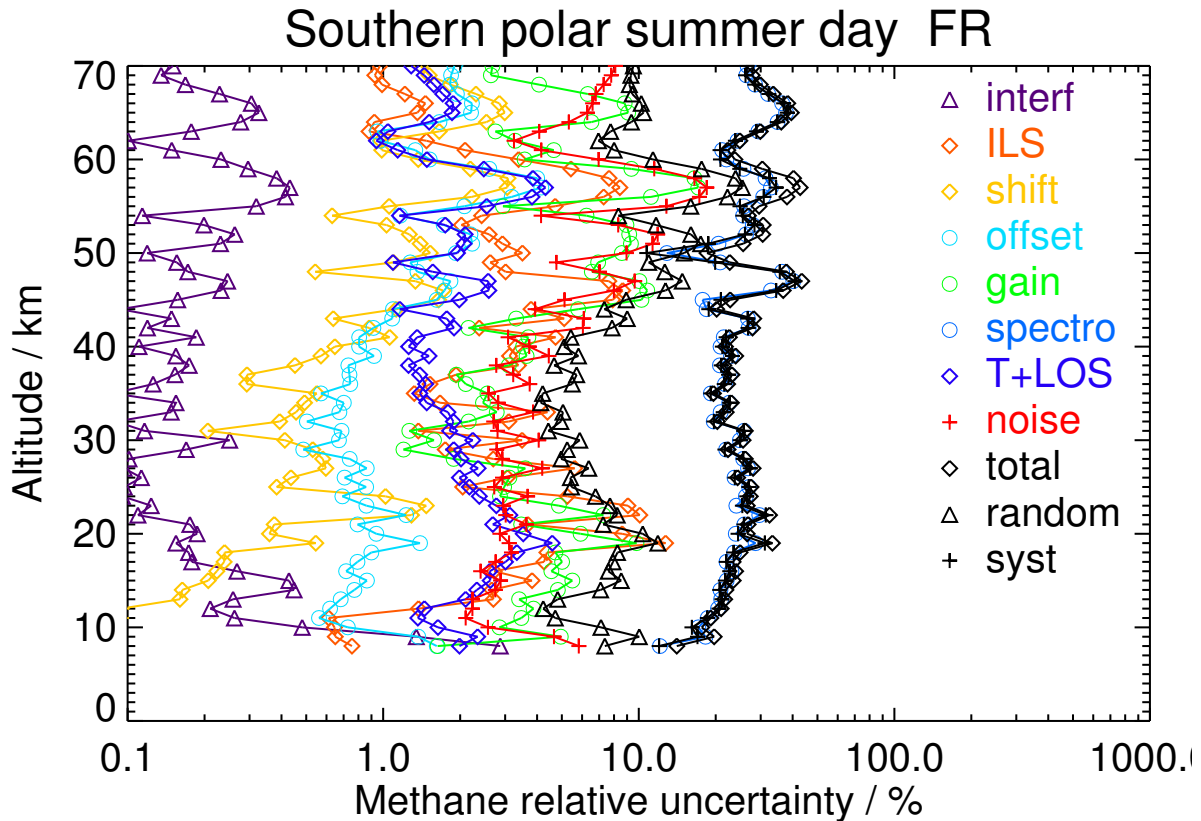

**Figure S31.** V8H\_CH4\_61 Southern polar summer day



**Table S32.** Methane error budget for Southern polar summer night. All uncertainties are  $1\sigma$ .

| altitude (km) | mean target (ppbv) | interf (ppbv) | ILS (ppbv) | shift (ppbv) | offset (ppbv) | gain (ppbv) | spectro (ppbv) | T+LOS (ppbv) | noise (ppbv) | random (ppbv) | syst (ppbv) | total (ppbv) |
|---------------|--------------------|---------------|------------|--------------|---------------|-------------|----------------|--------------|--------------|---------------|-------------|--------------|
| 9             | 1654.68            | 24.61         | 12.49      | 1.28         | 20.55         | 65.27       | 239.93         | 35.93        | 69.38        | 158.18        | 209.99      | 262.91       |
| 12            | 1703.28            | 2.60          | 16.59      | 1.26         | 10.24         | 56.09       | 356.76         | 25.76        | 31.13        | 71.11         | 356.92      | 363.93       |
| 15            | 1751.27            | 5.65          | 81.54      | 5.20         | 15.92         | 133.68      | 326.21         | 42.06        | 41.59        | 113.41        | 349.11      | 367.07       |
| 18            | 1480.37            | 1.62          | 43.46      | 4.21         | 11.34         | 89.32       | 336.53         | 34.92        | 33.50        | 98.13         | 340.56      | 354.42       |
| 21            | 1247.37            | 0.91          | 58.25      | 12.12        | 14.15         | 102.40      | 327.04         | 31.20        | 33.59        | 119.20        | 330.27      | 351.12       |
| 24            | 1129.10            | 0.89          | 34.20      | 4.31         | 10.41         | 51.49       | 292.84         | 22.50        | 32.35        | 76.24         | 292.31      | 302.09       |
| 27            | 953.12             | 1.44          | 24.91      | 3.65         | 8.91          | 25.21       | 230.43         | 18.79        | 30.96        | 54.03         | 229.87      | 236.14       |
| 30            | 872.38             | 1.06          | 13.12      | 2.46         | 7.66          | 23.96       | 222.68         | 16.07        | 28.22        | 72.15         | 215.05      | 226.83       |
| 33            | 735.82             | 1.20          | 18.66      | 3.49         | 7.03          | 28.36       | 161.63         | 12.51        | 25.27        | 50.62         | 159.92      | 167.74       |
| 36            | 568.91             | 0.63          | 7.98       | 1.32         | 5.31          | 12.94       | 126.56         | 8.84         | 22.73        | 28.81         | 126.66      | 129.90       |
| 39            | 389.33             | 0.57          | 12.24      | 2.71         | 4.60          | 15.56       | 84.77          | 5.99         | 21.07        | 25.77         | 86.15       | 89.92        |
| 42            | 222.20             | 0.42          | 8.47       | 1.73         | 3.62          | 6.30        | 69.59          | 5.03         | 21.36        | 25.69         | 69.22       | 73.83        |
| 45            | 189.62             | 0.51          | 16.45      | 1.96         | 4.39          | 23.24       | 46.13          | 5.34         | 18.80        | 25.48         | 51.91       | 57.83        |
| 48            | 110.66             | 0.22          | 2.06       | 0.98         | 1.22          | 4.54        | 32.45          | 1.19         | 6.51         | 12.95         | 30.93       | 33.53        |
| 52            | 83.50              | 0.20          | 1.31       | 1.31         | 2.11          | 7.64        | 21.10          | 1.52         | 9.39         | 13.85         | 20.25       | 24.54        |
| 56            | 105.69             | 0.24          | 4.45       | 1.72         | 2.05          | 6.18        | 28.86          | 1.73         | 9.27         | 14.45         | 27.90       | 31.42        |
| 60            | 171.47             | 0.15          | 2.98       | 1.84         | 1.48          | 4.27        | 41.56          | 2.26         | 6.16         | 15.49         | 39.54       | 42.46        |
| 64            | 171.55             | 0.44          | 1.69       | 2.76         | 2.62          | 8.22        | 50.00          | 2.52         | 7.56         | 13.35         | 49.70       | 51.47        |
| 68            | 157.94             | 0.28          | 1.42       | 1.75         | 3.42          | 5.00        | 43.20          | 3.50         | 15.00        | 17.08         | 43.05       | 46.31        |

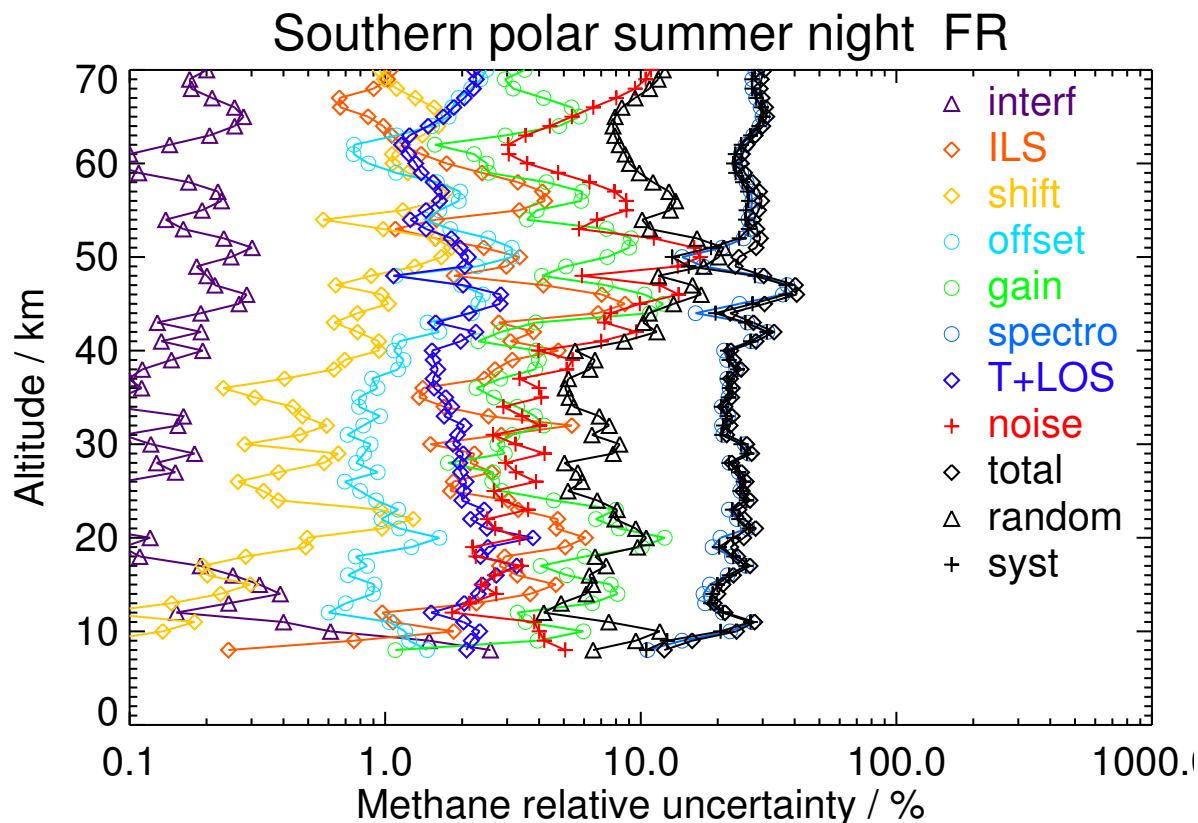

**Figure S32.** V8H\_CH4\_61 Southern polar summer night

**Table S33.** Methane error budget for Southern polar autumn day. All uncertainties are  $1\sigma$ .

| altitude (km) | mean target (ppbv) | interf (ppbv) | ILS (ppbv) | shift (ppbv) | offset (ppbv) | gain (ppbv) | spectro (ppbv) | T+LOS (ppbv) | noise (ppbv) | random (ppbv) | syst (ppbv) | total (ppbv) |
|---------------|--------------------|---------------|------------|--------------|---------------|-------------|----------------|--------------|--------------|---------------|-------------|--------------|
| 9             | 1692.53            | 63.20         | 1.74       | 2.91         | 27.70         | 63.24       | 473.24         | 48.93        | 101.72       | 133.81        | 477.04      | 495.45       |
| 12            | 1754.13            | 4.44          | 17.17      | 1.92         | 10.38         | 88.19       | 323.61         | 30.75        | 35.37        | 60.37         | 333.89      | 339.30       |
| 15            | 1551.81            | 11.12         | 36.20      | 3.91         | 12.45         | 43.42       | 326.90         | 43.48        | 45.23        | 78.97         | 328.72      | 338.07       |
| 18            | 1375.14            | 3.14          | 25.26      | 5.47         | 13.21         | 100.18      | 272.31         | 32.26        | 37.02        | 64.31         | 288.65      | 295.73       |
| 21            | 1209.83            | 2.34          | 21.43      | 13.51        | 16.04         | 95.88       | 278.79         | 24.68        | 33.24        | 58.64         | 293.42      | 299.22       |
| 24            | 1038.03            | 1.66          | 21.52      | 5.09         | 13.71         | 58.61       | 245.34         | 21.51        | 32.33        | 53.42         | 250.92      | 256.54       |
| 27            | 807.87             | 1.27          | 8.18       | 1.88         | 10.38         | 18.62       | 190.45         | 18.58        | 31.10        | 46.21         | 189.67      | 195.22       |
| 30            | 666.81             | 0.51          | 5.27       | 2.54         | 7.89          | 12.14       | 166.35         | 17.65        | 25.18        | 39.71         | 165.18      | 169.88       |
| 33            | 428.21             | 0.46          | 9.71       | 1.88         | 6.24          | 11.79       | 111.89         | 11.35        | 21.64        | 34.80         | 110.37      | 115.73       |
| 36            | 224.36             | 0.30          | 4.99       | 1.77         | 4.23          | 9.39        | 61.01          | 5.74         | 17.40        | 29.57         | 57.60       | 64.75        |
| 39            | 123.40             | 0.26          | 5.49       | 1.52         | 2.96          | 6.30        | 31.72          | 3.21         | 13.23        | 19.65         | 29.77       | 35.67        |
| 42            | 88.25              | 0.23          | 3.09       | 0.73         | 2.28          | 3.58        | 22.77          | 1.64         | 11.06        | 14.14         | 21.71       | 25.91        |
| 45            | 109.63             | 0.39          | 4.59       | 1.08         | 2.93          | 5.96        | 27.58          | 2.58         | 15.41        | 18.83         | 26.77       | 32.73        |
| 48            | 163.88             | 0.14          | 1.31       | 1.57         | 2.24          | 7.20        | 36.12          | 3.09         | 7.99         | 12.58         | 35.79       | 37.94        |
| 52            | 221.36             | 0.15          | 5.06       | 0.75         | 2.38          | 7.71        | 51.49          | 2.42         | 6.12         | 10.43         | 51.73       | 52.78        |
| 56            | 209.78             | 0.25          | 5.24       | 2.17         | 4.18          | 11.56       | 46.64          | 3.11         | 10.19        | 17.75         | 46.44       | 49.72        |
| 60            | 167.32             | 0.07          | 1.65       | 0.81         | 1.45          | 4.56        | 42.42          | 2.67         | 6.47         | 12.32         | 41.51       | 43.30        |
| 64            | 91.92              | 0.24          | 1.36       | 1.65         | 2.63          | 4.17        | 32.70          | 2.49         | 9.58         | 15.73         | 30.81       | 34.59        |
| 68            | 44.72              | 0.10          | 0.52       | 0.50         | 3.80          | 1.18        | 16.79          | 1.53         | 16.84        | 19.26         | 14.60       | 24.17        |

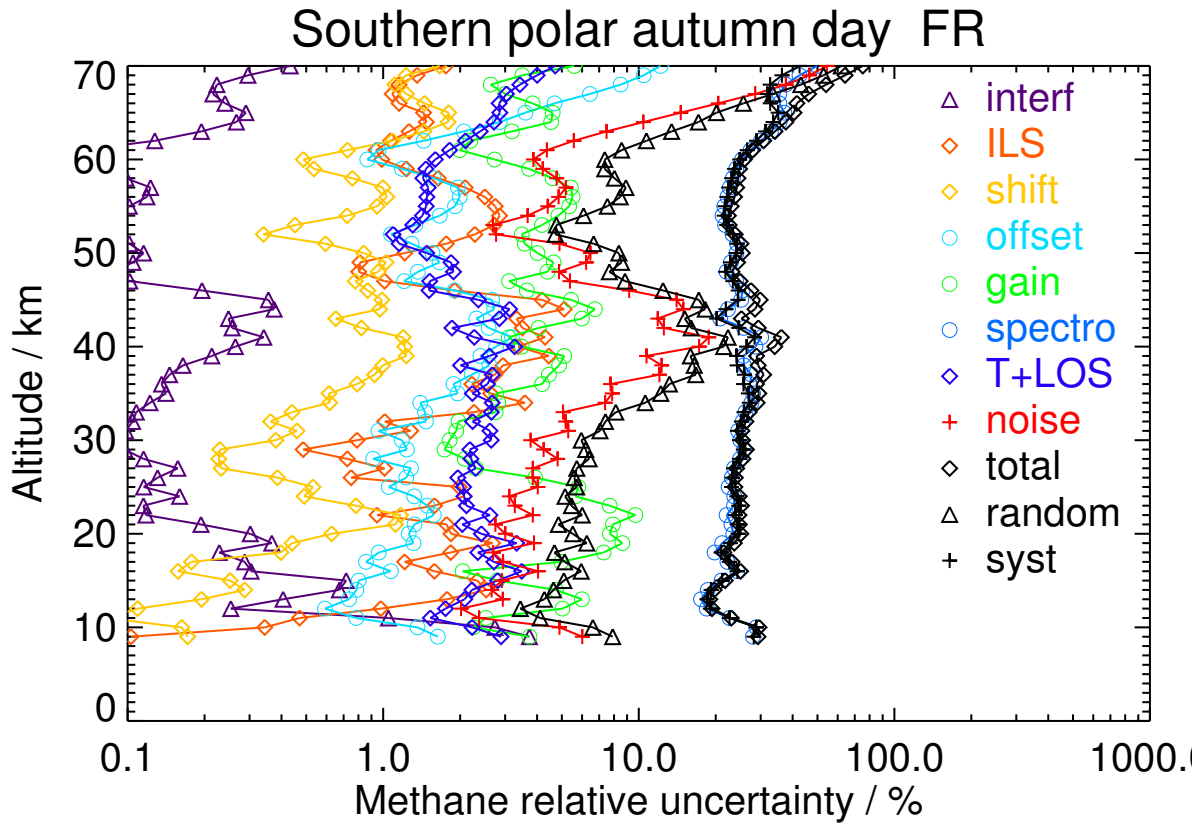

**Figure S33.** V8H\_CH4\_61 Southern polar autumn day

**Table S34.** Methane error budget for Southern polar autumn night. All uncertainties are  $1\sigma$ .

| altitude (km) | mean target (ppbv) | interf (ppbv) | ILS (ppbv) | shift (ppbv) | offset (ppbv) | gain (ppbv) | spectro (ppbv) | T+LOS (ppbv) | noise (ppbv) | random (ppbv) | syst (ppbv) | total (ppbv) |
|---------------|--------------------|---------------|------------|--------------|---------------|-------------|----------------|--------------|--------------|---------------|-------------|--------------|
| 9             | 1706.65            | 31.30         | 1.76       | 1.79         | 23.34         | 52.79       | 292.35         | 35.58        | 71.94        | 164.17        | 263.20      | 310.20       |
| 12            | 1751.21            | 8.09          | 13.75      | 2.08         | 11.08         | 69.08       | 338.47         | 29.15        | 33.49        | 69.79         | 341.78      | 348.83       |
| 15            | 1623.13            | 11.35         | 47.95      | 6.21         | 13.74         | 66.63       | 308.03         | 43.91        | 46.14        | 88.52         | 313.36      | 325.62       |
| 18            | 1407.28            | 3.04          | 44.54      | 4.81         | 14.52         | 99.69       | 256.90         | 32.18        | 36.79        | 74.52         | 273.86      | 283.82       |
| 21            | 1205.42            | 2.13          | 23.44      | 10.36        | 16.68         | 93.70       | 260.21         | 25.86        | 34.38        | 70.68         | 272.55      | 281.56       |
| 24            | 1015.13            | 1.25          | 16.63      | 7.16         | 15.02         | 55.11       | 230.94         | 21.73        | 34.60        | 61.56         | 234.10      | 242.06       |
| 27            | 773.07             | 1.02          | 9.32       | 2.48         | 11.90         | 16.43       | 181.29         | 18.21        | 33.38        | 51.16         | 179.45      | 186.60       |
| 30            | 617.60             | 0.55          | 3.73       | 1.87         | 9.35          | 11.51       | 157.84         | 16.77        | 27.32        | 46.18         | 155.07      | 161.80       |
| 33            | 350.68             | 0.39          | 6.23       | 1.29         | 7.00          | 7.27        | 97.85          | 10.08        | 22.96        | 45.14         | 91.15       | 101.71       |
| 36            | 168.21             | 0.25          | 3.29       | 1.28         | 4.75          | 5.44        | 47.21          | 4.88         | 19.29        | 32.39         | 40.50       | 51.86        |
| 39            | 106.11             | 0.22          | 4.12       | 1.14         | 3.20          | 4.79        | 28.33          | 3.11         | 14.74        | 21.25         | 25.08       | 32.88        |
| 42            | 105.16             | 0.22          | 3.28       | 0.88         | 2.59          | 4.04        | 28.00          | 2.05         | 14.27        | 18.25         | 26.33       | 32.04        |
| 45            | 155.76             | 0.31          | 2.32       | 1.12         | 2.85          | 6.45        | 38.40          | 3.74         | 15.08        | 20.08         | 37.01       | 42.10        |
| 48            | 188.60             | 0.13          | 2.02       | 1.30         | 2.30          | 7.70        | 43.61          | 3.14         | 7.80         | 12.06         | 43.56       | 45.20        |
| 52            | 195.28             | 0.19          | 3.68       | 0.97         | 2.34          | 6.63        | 46.87          | 2.21         | 9.41         | 13.94         | 46.47       | 48.52        |
| 56            | 144.66             | 0.15          | 4.24       | 1.24         | 2.73          | 7.28        | 35.25          | 2.32         | 8.85         | 15.37         | 34.21       | 37.50        |
| 60            | 97.77              | 0.08          | 1.13       | 0.62         | 1.71          | 3.89        | 25.81          | 1.87         | 7.42         | 13.29         | 23.83       | 27.28        |
| 64            | 59.40              | 0.19          | 1.56       | 1.35         | 2.14          | 3.23        | 21.62          | 2.04         | 8.48         | 13.93         | 19.21       | 23.73        |
| 68            | 26.23              | 0.10          | 0.77       | 0.60         | 4.02          | 1.54        | 12.46          | 1.23         | 17.75        | 19.94         | 9.69        | 22.16        |

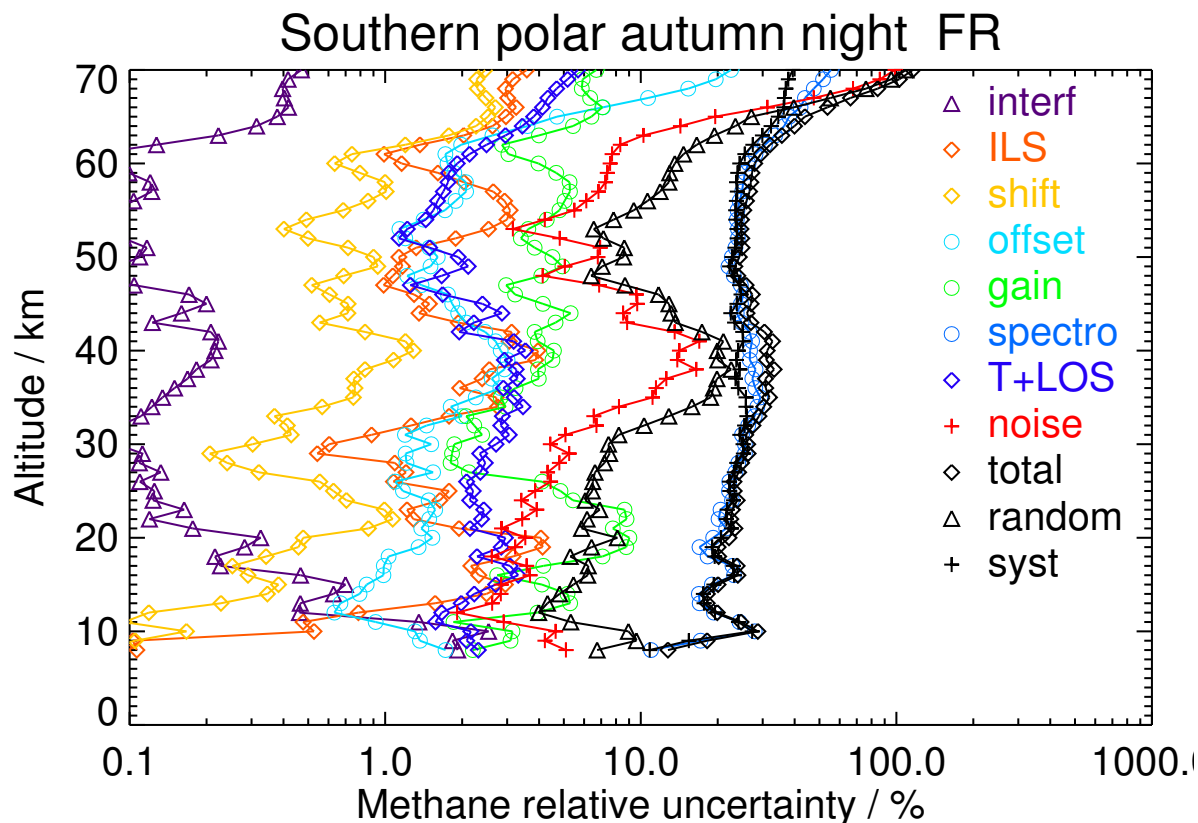

**Figure S34.** V8H\_CH4\_61 Southern polar autumn night

**S3 Methane error contribution profile plots and  
tabulated values for RR NOM data  
(V8R\_CH4\_261)**

**Table S35.** Methane error budget for Northern polar winter day. All uncertainties are  $1\sigma$ .

| altitude (km) | mean target (ppbv) | interf (ppbv) | ILS (ppbv) | shift (ppbv) | offset (ppbv) | gain (ppbv) | spectro (ppbv) | T+LOS (ppbv) | noise (ppbv) | random (ppbv) | syst (ppbv) | total (ppbv) |
|---------------|--------------------|---------------|------------|--------------|---------------|-------------|----------------|--------------|--------------|---------------|-------------|--------------|
| 20            | 1304.99            | 4.31          | 91.74      | 5.61         | 5.11          | 42.13       | 333.05         | 30.71        | 35.28        | 112.03        | 332.90      | 351.25       |
| 30            | 998.64             | 1.04          | 13.69      | 1.77         | 6.17          | 23.65       | 241.49         | 19.71        | 24.51        | 80.37         | 231.60      | 245.15       |
| 40            | 357.18             | 1.09          | 8.44       | 1.00         | 5.56          | 9.98        | 74.54          | 6.76         | 25.90        | 32.28         | 73.73       | 80.48        |
| 50            | 204.56             | 0.52          | 2.54       | 0.39         | 3.67          | 14.04       | 47.46          | 4.81         | 15.37        | 18.28         | 48.94       | 52.24        |
| 60            | 117.92             | 0.17          | 0.60       | 0.24         | 1.64          | 1.74        | 28.84          | 3.13         | 14.62        | 16.28         | 28.21       | 32.58        |
| 70            | 5.44               | 0.32          | 2.54       | 0.31         | 5.88          | 3.75        | 12.43          | 0.97         | 27.52        | 29.16         | 10.86       | 31.11        |
| 30            | 998.64             | 1.04          | 13.69      | 1.77         | 6.17          | 23.65       | 241.49         | 19.71        | 24.51        | 80.37         | 231.60      | 245.15       |
| 33            | 752.37             | 0.84          | 5.42       | 2.24         | 3.54          | 12.14       | 186.70         | 16.19        | 23.06        | 53.19         | 181.71      | 189.33       |
| 36            | 496.70             | 1.07          | 8.38       | 1.89         | 3.12          | 14.90       | 120.10         | 8.47         | 20.13        | 39.25         | 116.91      | 123.32       |
| 39            | 378.01             | 1.13          | 8.29       | 1.16         | 3.14          | 11.62       | 80.90          | 6.21         | 20.27        | 30.62         | 79.21       | 84.92        |
| 42            | 328.90             | 1.02          | 7.67       | 1.19         | 3.20          | 10.01       | 66.48          | 5.54         | 20.42        | 26.69         | 65.78       | 70.99        |
| 45            | 274.32             | 0.71          | 5.29       | 1.21         | 3.32          | 14.27       | 59.38          | 4.85         | 18.57        | 26.76         | 58.51       | 64.34        |
| 48            | 244.39             | 0.80          | 4.46       | 0.76         | 4.67          | 22.12       | 52.68          | 5.91         | 17.29        | 22.54         | 55.97       | 60.34        |
| 52            | 183.52             | 0.26          | 1.38       | 0.43         | 2.48          | 7.07        | 42.88          | 3.97         | 12.96        | 15.78         | 42.80       | 45.62        |
| 56            | 164.48             | 0.23          | 1.11       | 0.42         | 1.63          | 2.96        | 38.84          | 3.87         | 12.74        | 14.50         | 38.58       | 41.22        |
| 60            | 117.92             | 0.17          | 0.60       | 0.24         | 1.64          | 1.74        | 28.84          | 3.13         | 14.62        | 16.28         | 28.21       | 32.58        |
| 64            | 53.07              | 0.26          | 1.49       | 0.20         | 2.97          | 2.02        | 16.84          | 1.81         | 17.14        | 18.74         | 15.64       | 24.41        |
| 68            | 12.46              | 0.32          | 2.19       | 0.27         | 5.40          | 3.56        | 12.66          | 1.08         | 24.70        | 26.47         | 10.85       | 28.61        |

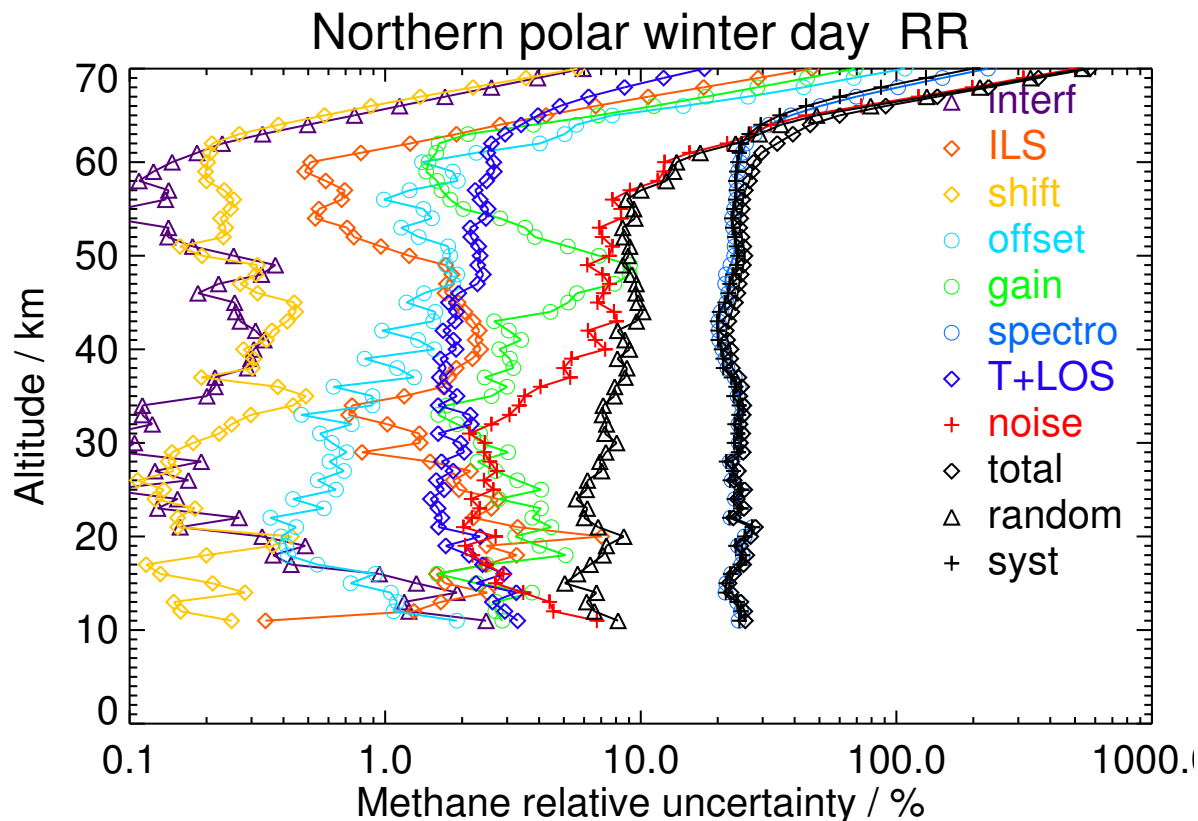

**Figure S35.** V8R\_CH4\_261 Northern polar winter day

**Table S36.** Methane error budget for Northern polar winter night. All uncertainties are  $1\sigma$ .

| altitude (km) | mean target (ppbv) | interf (ppbv) | ILS (ppbv) | shift (ppbv) | offset (ppbv) | gain (ppbv) | spectro (ppbv) | T+LOS (ppbv) | noise (ppbv) | random (ppbv) | syst (ppbv) | total (ppbv) |
|---------------|--------------------|---------------|------------|--------------|---------------|-------------|----------------|--------------|--------------|---------------|-------------|--------------|
| 9             | 1923.46            | 39.60         | 25.18      | 3.22         | 32.32         | 73.90       | 391.36         | 75.21        | 118.10       | 149.88        | 398.77      | 426.01       |
| 12            | 1792.23            | 22.84         | 34.25      | 2.99         | 18.80         | 51.22       | 403.16         | 50.66        | 81.95        | 109.44        | 405.62      | 420.12       |
| 15            | 1457.38            | 22.83         | 31.20      | 2.50         | 14.15         | 20.09       | 312.26         | 42.46        | 50.96        | 84.35         | 311.28      | 322.51       |
| 18            | 1303.36            | 5.87          | 18.95      | 4.24         | 6.57          | 34.66       | 327.82         | 31.47        | 35.28        | 78.82         | 324.26      | 333.71       |
| 21            | 1057.78            | 1.72          | 42.32      | 2.24         | 7.23          | 44.34       | 314.99         | 23.90        | 33.35        | 115.44        | 302.31      | 323.60       |
| 24            | 928.85             | 2.98          | 26.30      | 2.59         | 4.15          | 28.65       | 206.55         | 14.34        | 22.26        | 104.76        | 184.21      | 211.92       |
| 27            | 939.22             | 1.60          | 16.69      | 2.28         | 7.67          | 18.54       | 249.34         | 18.07        | 30.02        | 111.67        | 227.20      | 253.16       |
| 30            | 889.99             | 4.30          | 20.93      | 4.22         | 6.47          | 34.98       | 174.23         | 14.21        | 20.32        | 80.23         | 162.09      | 180.86       |
| 33            | 668.08             | 2.14          | 10.39      | 3.08         | 4.94          | 25.55       | 156.42         | 11.72        | 23.08        | 57.54         | 150.41      | 161.04       |
| 36            | 413.39             | 2.29          | 13.43      | 2.57         | 4.18          | 17.86       | 100.17         | 5.78         | 20.15        | 46.40         | 94.07       | 104.89       |
| 39            | 346.83             | 1.48          | 11.94      | 1.78         | 3.68          | 18.72       | 75.60          | 4.71         | 17.01        | 31.39         | 74.52       | 80.86        |
| 42            | 351.64             | 1.40          | 14.49      | 2.15         | 3.13          | 15.81       | 73.97          | 4.43         | 14.38        | 26.31         | 74.04       | 78.58        |
| 45            | 341.86             | 1.10          | 10.45      | 2.45         | 2.53          | 10.78       | 72.87          | 4.39         | 13.19        | 24.06         | 71.85       | 75.77        |
| 48            | 279.07             | 0.96          | 5.19       | 1.48         | 2.17          | 4.23        | 59.84          | 4.08         | 13.25        | 22.47         | 57.62       | 61.85        |
| 52            | 194.66             | 0.35          | 2.95       | 0.49         | 1.67          | 3.74        | 43.67          | 3.42         | 10.44        | 15.27         | 42.67       | 45.32        |
| 56            | 160.45             | 0.30          | 3.21       | 0.63         | 1.21          | 2.23        | 36.63          | 3.23         | 9.70         | 12.04         | 36.31       | 38.25        |
| 60            | 141.48             | 0.28          | 1.34       | 0.72         | 1.48          | 1.68        | 33.02          | 3.27         | 12.02        | 13.85         | 32.57       | 35.39        |
| 64            | 97.70              | 0.40          | 1.66       | 0.70         | 2.58          | 3.62        | 27.11          | 2.97         | 15.90        | 19.23         | 25.50       | 31.94        |
| 68            | 64.50              | 0.51          | 3.13       | 1.09         | 5.09          | 6.01        | 26.24          | 2.86         | 24.64        | 28.64         | 23.60       | 37.11        |

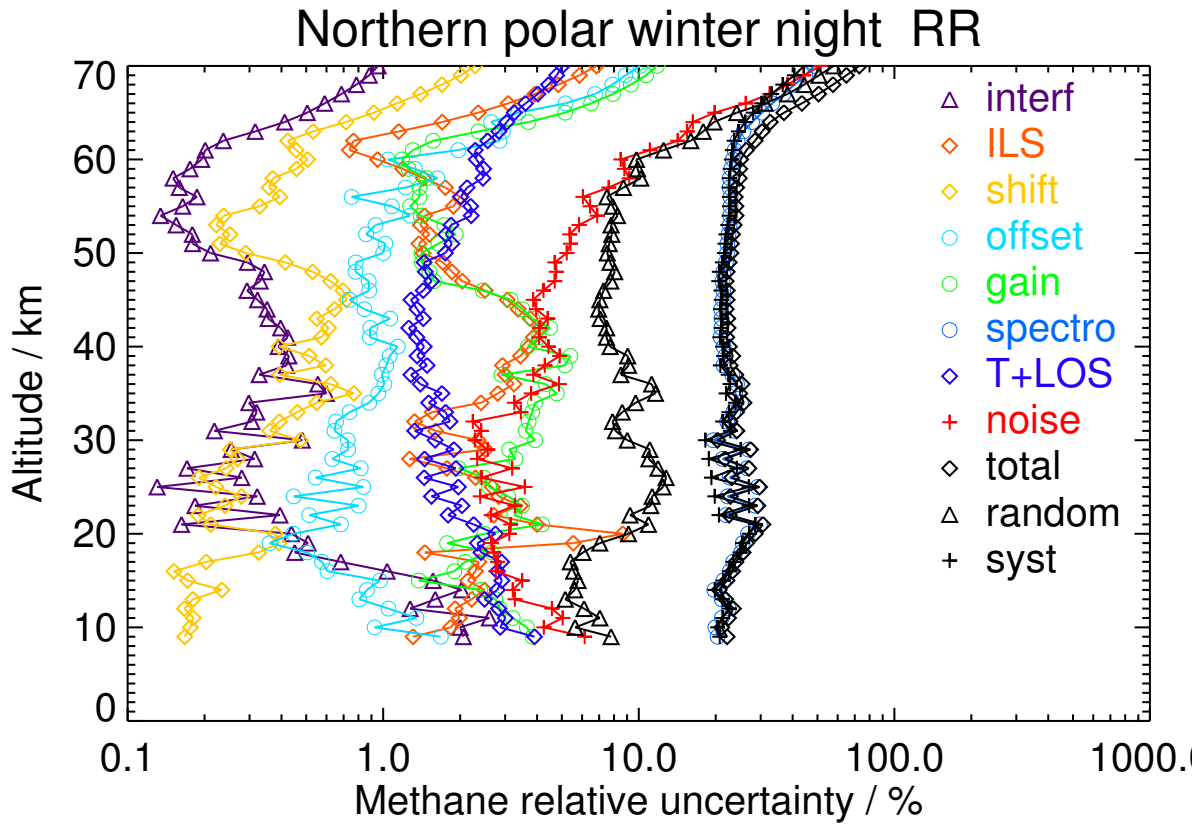

**Figure S36.** V8R\_CH4\_261 Northern polar winter night

**Table S37.** Methane error budget for Northern polar spring day. All uncertainties are  $1\sigma$ .

| altitude (km) | mean target (ppbv) | interf (ppbv) | ILS (ppbv) | shift (ppbv) | offset (ppbv) | gain (ppbv) | spectro (ppbv) | T+LOS (ppbv) | noise (ppbv) | random (ppbv) | syst (ppbv) | total (ppbv) |
|---------------|--------------------|---------------|------------|--------------|---------------|-------------|----------------|--------------|--------------|---------------|-------------|--------------|
| 12            | 1726.47            | 8.38          | 12.49      | 2.22         | 18.73         | 45.21       | 397.42         | 50.92        | 71.90        | 97.16         | 398.60      | 410.28       |
| 15            | 1508.07            | 5.78          | 24.98      | 2.26         | 12.53         | 47.45       | 294.46         | 44.93        | 47.42        | 77.83         | 296.63      | 306.67       |
| 18            | 1371.52            | 3.14          | 27.56      | 2.56         | 6.58          | 70.84       | 318.67         | 29.12        | 33.50        | 63.86         | 324.47      | 330.69       |
| 21            | 1180.83            | 1.19          | 23.08      | 2.13         | 6.07          | 52.00       | 280.92         | 24.08        | 33.59        | 52.61         | 284.85      | 289.66       |
| 24            | 1146.28            | 0.78          | 13.76      | 1.76         | 6.52          | 37.36       | 260.98         | 20.74        | 34.33        | 48.26         | 262.72      | 267.12       |
| 27            | 938.98             | 0.64          | 8.15       | 1.42         | 8.07          | 12.47       | 220.32         | 21.26        | 37.82        | 50.22         | 219.52      | 225.19       |
| 30            | 791.07             | 0.67          | 29.06      | 1.62         | 6.07          | 11.05       | 190.71         | 19.44        | 29.78        | 41.89         | 192.06      | 196.58       |
| 33            | 531.70             | 0.89          | 5.35       | 2.39         | 4.69          | 6.86        | 125.26         | 12.82        | 26.54        | 33.24         | 124.73      | 129.08       |
| 36            | 365.91             | 1.20          | 7.63       | 2.12         | 4.26          | 5.25        | 79.31          | 6.77         | 23.29        | 27.07         | 79.09       | 83.59        |
| 39            | 278.72             | 0.72          | 6.16       | 1.32         | 3.46          | 11.42       | 61.93          | 4.41         | 19.45        | 21.74         | 62.80       | 66.45        |
| 42            | 202.42             | 0.26          | 6.64       | 1.18         | 2.55          | 7.97        | 48.98          | 3.06         | 16.45        | 19.04         | 49.32       | 52.87        |
| 45            | 119.02             | 0.22          | 4.25       | 0.72         | 2.36          | 5.15        | 31.92          | 1.98         | 14.36        | 17.65         | 31.12       | 35.77        |
| 48            | 58.34              | 0.32          | 3.10       | 0.63         | 2.09          | 4.51        | 16.54          | 1.25         | 10.70        | 16.68         | 12.10       | 20.61        |
| 52            | 66.20              | 0.12          | 0.83       | 0.29         | 0.96          | 1.99        | 18.86          | 0.77         | 5.12         | 11.28         | 16.15       | 19.70        |
| 56            | 73.40              | 0.10          | 0.83       | 0.23         | 0.75          | 1.60        | 19.01          | 0.78         | 4.34         | 8.63          | 17.61       | 19.62        |
| 60            | 55.40              | 0.08          | 0.56       | 0.13         | 0.95          | 1.17        | 14.84          | 0.73         | 5.56         | 7.80          | 13.90       | 15.94        |
| 64            | 39.70              | 0.21          | 0.60       | 0.23         | 1.14          | 1.12        | 10.72          | 0.61         | 8.11         | 9.26          | 9.91        | 13.57        |
| 68            | 19.49              | 0.23          | 0.83       | 0.56         | 3.05          | 2.55        | 8.43           | 0.59         | 14.42        | 15.62         | 7.22        | 17.21        |

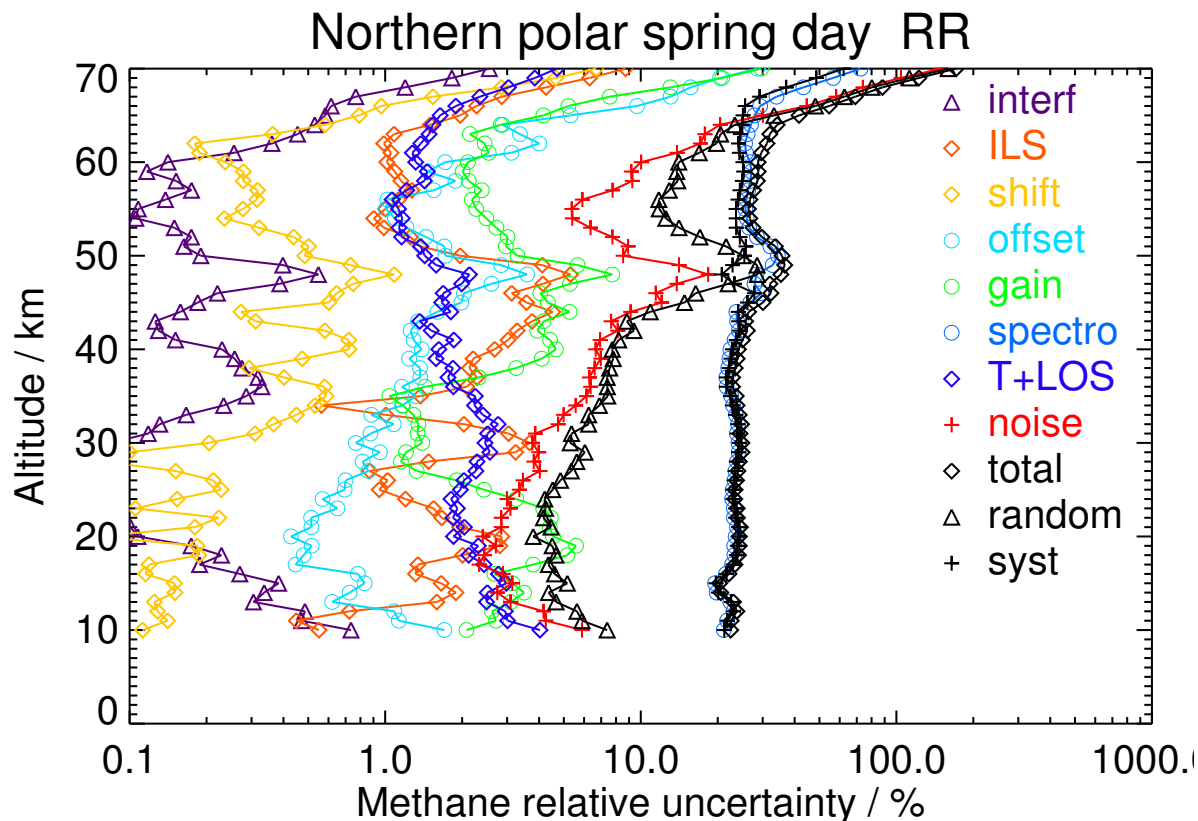

**Figure S37.** V8R\_CH4\_261 Northern polar spring day

**Table S38.** Methane error budget for Northern polar spring night. All uncertainties are  $1\sigma$ .

| altitude<br>(km) | mean target<br>(ppbv) | interf<br>(ppbv) | ILS<br>(ppbv) | shift<br>(ppbv) | offset<br>(ppbv) | gain<br>(ppbv) | spectro<br>(ppbv) | T+LOS<br>(ppbv) | noise<br>(ppbv) | random<br>(ppbv) | syst<br>(ppbv) | total<br>(ppbv) |
|------------------|-----------------------|------------------|---------------|-----------------|------------------|----------------|-------------------|-----------------|-----------------|------------------|----------------|-----------------|
| 12               | 1704.03               | 8.36             | 14.22         | 2.40            | 20.15            | 44.32          | 405.59            | 52.64           | 78.41           | 103.90           | 406.54         | 419.61          |
| 15               | 1628.79               | 5.34             | 18.16         | 2.27            | 13.41            | 38.30          | 337.88            | 42.92           | 46.48           | 75.75            | 338.29         | 346.66          |
| 18               | 1449.95               | 2.88             | 19.49         | 2.32            | 6.85             | 86.94          | 335.48            | 33.97           | 34.06           | 64.11            | 344.60         | 350.51          |
| 21               | 1243.22               | 1.19             | 12.35         | 2.43            | 7.42             | 70.52          | 304.39            | 25.17           | 35.85           | 54.14            | 311.17         | 315.84          |
| 24               | 1091.28               | 0.91             | 19.11         | 1.71            | 5.12             | 31.56          | 254.30            | 19.12           | 31.48           | 47.75            | 255.22         | 259.65          |
| 27               | 975.58                | 0.70             | 7.35          | 1.14            | 8.84             | 14.21          | 231.77            | 21.52           | 41.27           | 54.44            | 230.78         | 237.11          |
| 30               | 783.55                | 0.69             | 24.69         | 1.51            | 6.00             | 10.94          | 190.37            | 19.19           | 29.36           | 39.84            | 191.44         | 195.55          |
| 33               | 537.01                | 0.86             | 3.82          | 1.87            | 4.14             | 6.53           | 127.65            | 13.21           | 26.61           | 34.15            | 126.84         | 131.36          |
| 36               | 366.70                | 1.15             | 8.75          | 2.20            | 3.76             | 6.33           | 85.97             | 6.91            | 23.02           | 26.62            | 86.00          | 90.03           |
| 39               | 304.82                | 0.87             | 6.63          | 1.65            | 3.43             | 13.15          | 74.78             | 4.86            | 19.66           | 22.42            | 75.71          | 78.96           |
| 42               | 218.63                | 0.26             | 8.38          | 1.25            | 2.27             | 9.29           | 53.67             | 3.77            | 16.11           | 17.83            | 54.76          | 57.59           |
| 45               | 147.40                | 0.21             | 4.05          | 0.63            | 2.29             | 5.19           | 35.13             | 2.41            | 14.80           | 16.14            | 35.32          | 38.84           |
| 48               | 108.87                | 0.34             | 4.38          | 0.66            | 2.33             | 6.51           | 22.75             | 2.06            | 12.12           | 14.58            | 22.88          | 27.14           |
| 52               | 75.95                 | 0.13             | 1.19          | 0.33            | 1.17             | 1.87           | 20.06             | 0.94            | 6.66            | 11.13            | 18.17          | 21.31           |
| 56               | 86.36                 | 0.08             | 0.78          | 0.23            | 0.77             | 1.95           | 21.76             | 0.95            | 4.75            | 8.20             | 20.85          | 22.40           |
| 60               | 60.07                 | 0.08             | 0.73          | 0.22            | 0.82             | 1.33           | 16.45             | 0.99            | 5.63            | 8.00             | 15.56          | 17.50           |
| 64               | 38.00                 | 0.20             | 0.32          | 0.23            | 1.01             | 0.58           | 10.96             | 0.73            | 8.07            | 9.24             | 10.10          | 13.69           |
| 68               | 20.36                 | 0.20             | 0.41          | 0.51            | 3.35             | 1.48           | 9.88              | 0.71            | 15.45           | 16.93            | 8.01           | 18.73           |

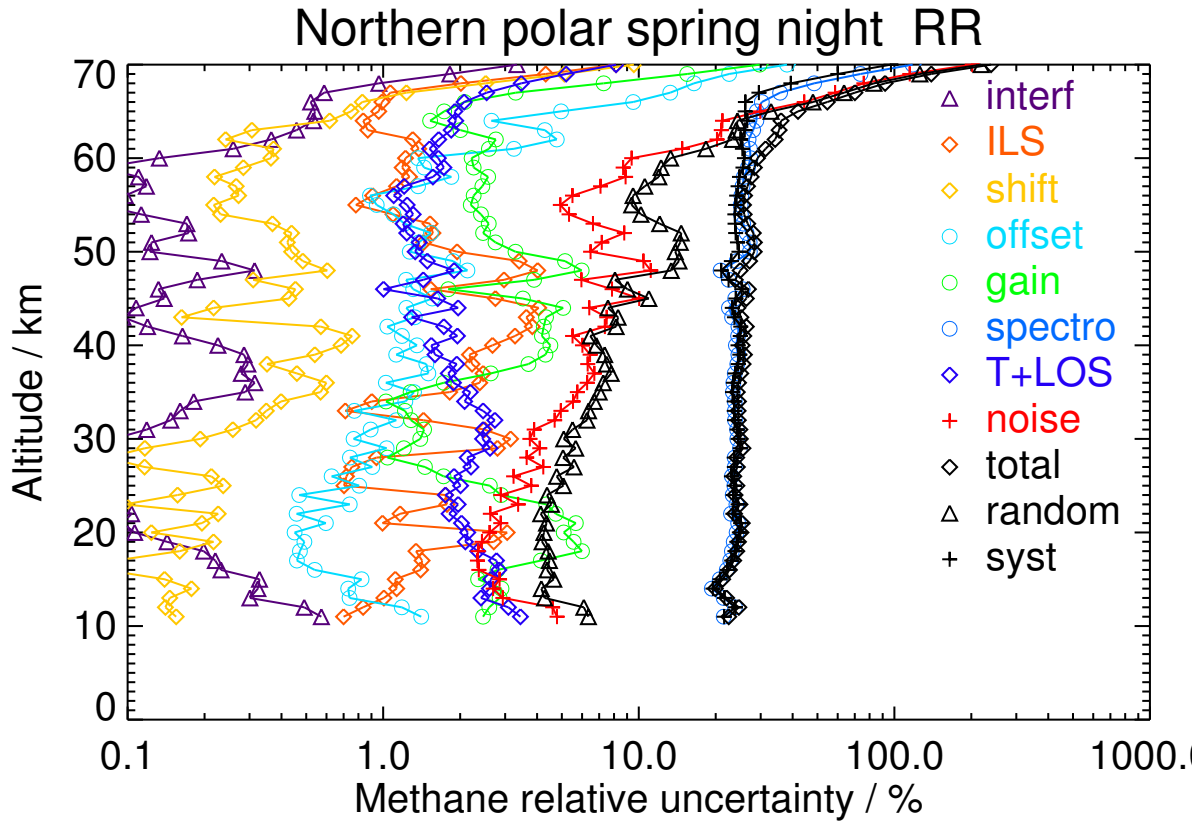

**Figure S38.** V8R\_CH4\_261 Northern polar spring night



**Table S39.** Methane error budget for Northern polar summer day. All uncertainties are  $1\sigma$ .

| altitude<br>(km) | mean target<br>(ppbv) | interf<br>(ppbv) | ILS<br>(ppbv) | shift<br>(ppbv) | offset<br>(ppbv) | gain<br>(ppbv) | spectro<br>(ppbv) | T+LOS<br>(ppbv) | noise<br>(ppbv) | random<br>(ppbv) | syst<br>(ppbv) | total<br>(ppbv) |
|------------------|-----------------------|------------------|---------------|-----------------|------------------|----------------|-------------------|-----------------|-----------------|------------------|----------------|-----------------|
| 12               | 1843.28               | 11.41            | 18.94         | 2.54            | 19.37            | 43.19          | 401.50            | 54.00           | 78.62           | 111.27           | 400.82         | 415.98          |
| 15               | 1757.82               | 9.09             | 51.44         | 4.33            | 12.80            | 59.26          | 344.74            | 47.54           | 48.50           | 91.81            | 348.50         | 360.39          |
| 18               | 1638.20               | 3.38             | 61.37         | 3.71            | 7.60             | 92.00          | 378.17            | 30.42           | 32.58           | 102.78           | 383.07         | 396.62          |
| 21               | 1286.91               | 2.05             | 53.65         | 5.10            | 7.74             | 30.78          | 343.57            | 29.63           | 34.96           | 73.01            | 344.56         | 352.21          |
| 24               | 1134.73               | 1.34             | 16.16         | 1.43            | 2.84             | 10.70          | 249.48            | 14.74           | 19.80           | 34.92            | 249.03         | 251.47          |
| 27               | 1074.14               | 0.78             | 11.67         | 4.00            | 8.13             | 9.69           | 256.29            | 21.73           | 34.20           | 44.35            | 256.26         | 260.07          |
| 30               | 916.97                | 0.72             | 45.92         | 1.90            | 3.88             | 24.93          | 171.86            | 12.51           | 19.05           | 28.17            | 178.92         | 181.12          |
| 33               | 708.47                | 1.03             | 7.51          | 2.50            | 3.72             | 18.44          | 142.19            | 9.68            | 22.32           | 28.11            | 142.96         | 145.70          |
| 36               | 499.66                | 1.91             | 18.33         | 3.25            | 3.66             | 10.45          | 109.70            | 5.67            | 22.54           | 25.95            | 111.23         | 114.22          |
| 39               | 317.43                | 1.31             | 8.22          | 1.71            | 3.05             | 11.57          | 69.96             | 3.19            | 20.38           | 22.62            | 70.88          | 74.40           |
| 42               | 242.87                | 0.60             | 7.51          | 1.29            | 2.37             | 9.44           | 55.77             | 2.28            | 17.19           | 19.60            | 56.39          | 59.70           |
| 45               | 176.99                | 0.40             | 4.23          | 0.74            | 2.41             | 6.55           | 50.93             | 2.01            | 16.97           | 20.67            | 50.26          | 54.35           |
| 48               | 116.86                | 0.31             | 8.97          | 0.95            | 2.53             | 10.41          | 27.32             | 2.20            | 14.88           | 20.74            | 27.18          | 34.19           |
| 52               | 77.80                 | 0.23             | 3.53          | 0.28            | 1.76             | 3.93           | 19.00             | 1.02            | 10.80           | 16.18            | 15.75          | 22.58           |
| 56               | 72.43                 | 0.12             | 1.33          | 0.31            | 0.96             | 1.78           | 18.00             | 0.67            | 5.91            | 8.02             | 17.35          | 19.12           |
| 60               | 68.62                 | 0.17             | 0.68          | 0.27            | 0.86             | 0.63           | 17.43             | 0.70            | 4.55            | 5.83             | 17.10          | 18.07           |
| 64               | 72.74                 | 0.25             | 1.13          | 0.24            | 0.80             | 0.92           | 19.64             | 0.80            | 6.17            | 7.07             | 19.43          | 20.67           |
| 68               | 97.44                 | 0.54             | 2.22          | 1.08            | 1.92             | 3.30           | 27.70             | 1.24            | 10.37           | 11.75            | 27.55          | 29.95           |

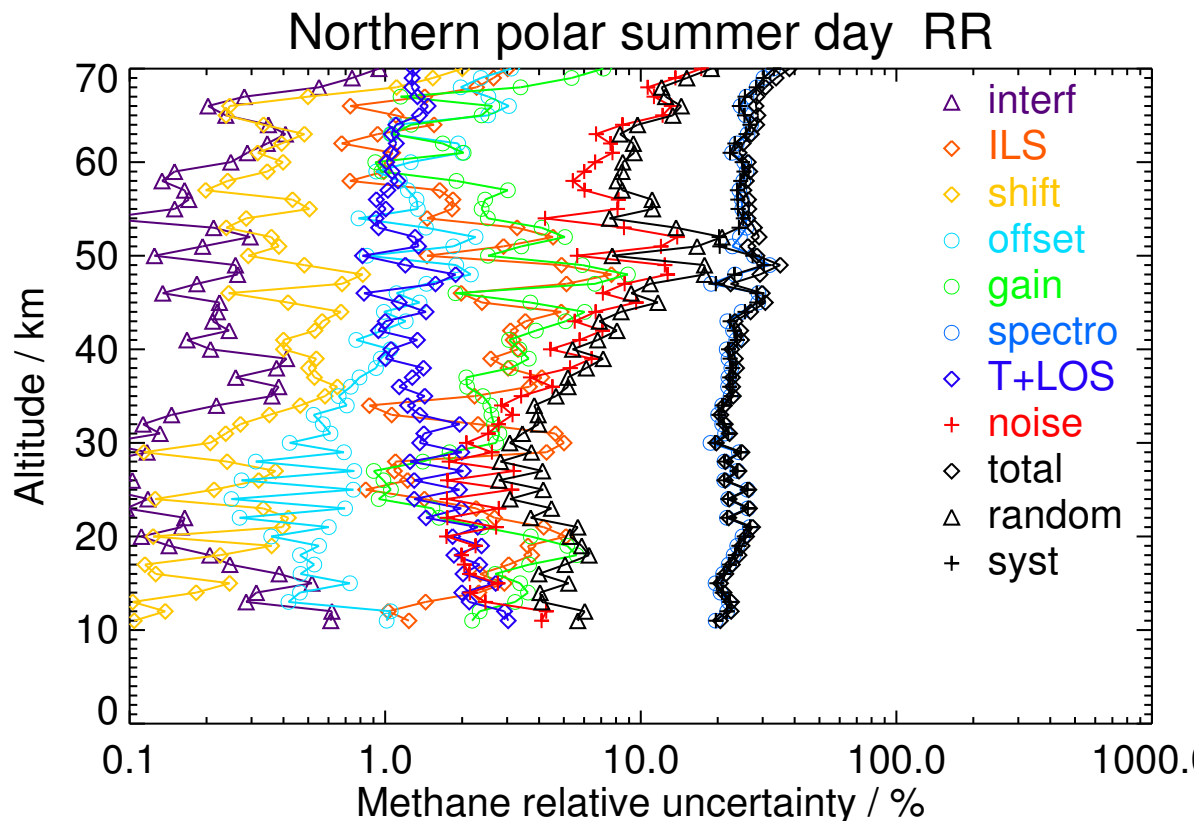

**Figure S39.** V8R\_CH4\_261 Northern polar summer day

**Table S40.** Methane error budget for Northern polar summer night. All uncertainties are  $1\sigma$ .

| altitude (km) | mean target (ppbv) | interf (ppbv) | ILS (ppbv) | shift (ppbv) | offset (ppbv) | gain (ppbv) | spectro (ppbv) | T+LOS (ppbv) | noise (ppbv) | random (ppbv) | syst (ppbv) | total (ppbv) |
|---------------|--------------------|---------------|------------|--------------|---------------|-------------|----------------|--------------|--------------|---------------|-------------|--------------|
| 15            | 1841.87            | 6.03          | 33.34      | 1.72         | 26.62         | 20.83       | 428.98         | 89.31        | 78.34        | 127.97        | 429.02      | 447.70       |
| 18            | 1634.77            | 1.55          | 58.28      | 2.31         | 8.07          | 111.79      | 356.84         | 41.24        | 31.38        | 79.35         | 373.75      | 382.08       |
| 21            | 1347.15            | 1.28          | 31.34      | 3.32         | 7.87          | 75.16       | 344.22         | 28.89        | 31.63        | 72.11         | 349.04      | 356.41       |
| 24            | 1114.34            | 1.18          | 18.63      | 1.35         | 4.60          | 14.74       | 253.27         | 19.18        | 24.49        | 39.35         | 253.28      | 256.32       |
| 27            | 1028.79            | 0.64          | 13.90      | 2.68         | 7.20          | 12.11       | 249.39         | 21.09        | 31.36        | 42.17         | 249.49      | 253.02       |
| 30            | 839.76             | 0.93          | 32.92      | 2.13         | 4.86          | 20.38       | 169.09         | 16.22        | 21.09        | 34.06         | 172.25      | 175.58       |
| 33            | 590.09             | 0.98          | 5.83       | 1.82         | 3.68          | 15.37       | 131.73         | 12.62        | 23.77        | 29.62         | 132.24      | 135.52       |
| 36            | 370.82             | 1.69          | 13.70      | 2.42         | 3.73          | 11.63       | 84.28          | 5.87         | 24.04        | 27.01         | 85.62       | 89.78        |
| 39            | 231.98             | 0.64          | 7.39       | 0.89         | 2.80          | 10.73       | 55.44          | 3.49         | 21.89        | 24.46         | 56.08       | 61.19        |
| 42            | 156.86             | 0.45          | 8.40       | 0.76         | 2.51          | 6.48        | 41.44          | 2.58         | 18.84        | 21.28         | 41.78       | 46.89        |
| 45            | 86.61              | 0.24          | 3.47       | 0.28         | 2.59          | 4.79        | 20.63          | 1.58         | 16.69        | 18.98         | 19.71       | 27.36        |
| 48            | 79.30              | 0.23          | 2.87       | 0.41         | 1.97          | 4.32        | 19.72          | 1.31         | 11.40        | 14.38         | 18.57       | 23.48        |
| 52            | 77.51              | 0.08          | 0.95       | 0.22         | 1.09          | 1.63        | 19.16          | 0.82         | 6.79         | 9.63          | 18.06       | 20.46        |
| 56            | 92.53              | 0.12          | 0.58       | 0.36         | 0.79          | 2.15        | 23.52          | 1.10         | 5.05         | 10.26         | 21.91       | 24.20        |
| 60            | 119.11             | 0.20          | 0.88       | 0.42         | 0.92          | 2.46        | 32.38          | 1.61         | 5.76         | 14.46         | 29.72       | 33.05        |
| 64            | 170.73             | 0.48          | 1.35       | 0.73         | 1.47          | 2.18        | 44.71          | 2.40         | 8.60         | 14.60         | 43.30       | 45.69        |
| 68            | 178.15             | 0.79          | 1.15       | 1.65         | 3.86          | 2.84        | 51.63          | 3.62         | 18.83        | 23.75         | 49.98       | 55.33        |

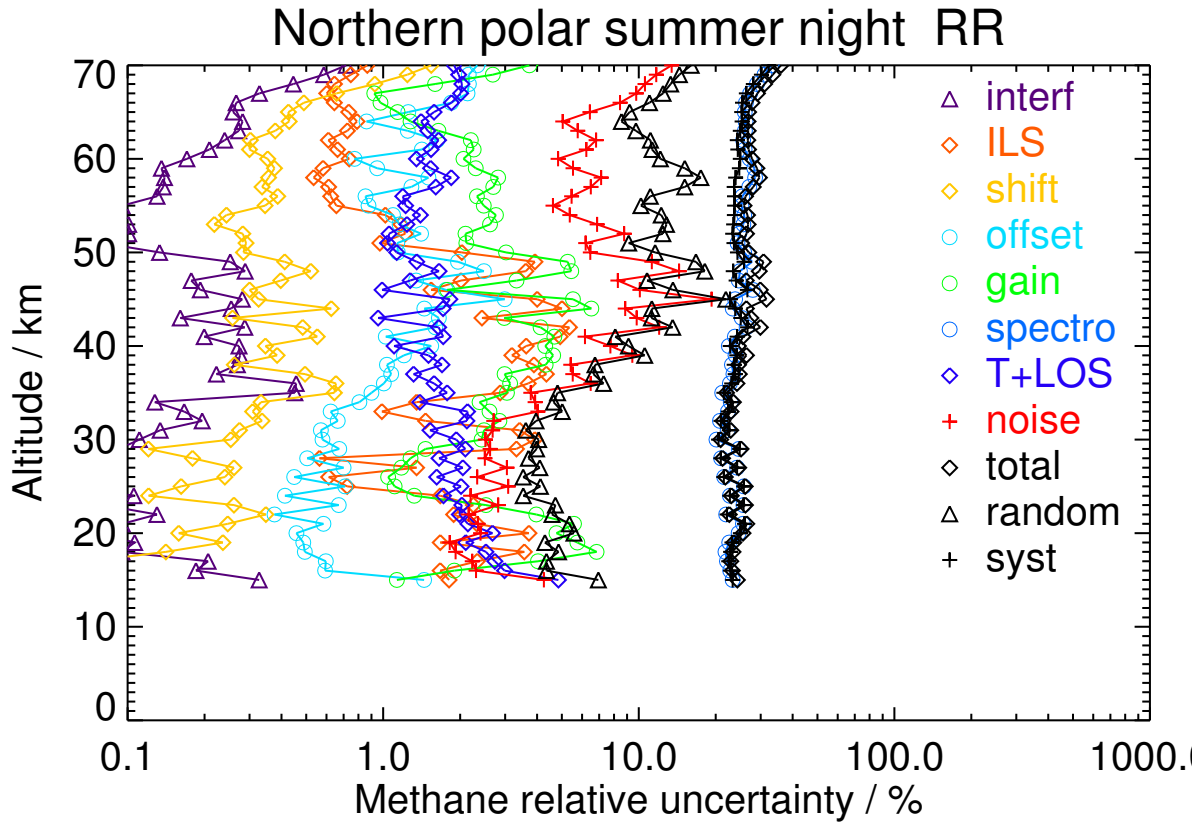

**Figure S40.** V8R\_CH4\_261 Northern polar summer night

**Table S41.** Methane error budget for Northern polar autumn day. All uncertainties are  $1\sigma$ .

| altitude (km) | mean target (ppbv) | interf (ppbv) | ILS (ppbv) | shift (ppbv) | offset (ppbv) | gain (ppbv) | spectro (ppbv) | T+LOS (ppbv) | noise (ppbv) | random (ppbv) | syst (ppbv) | total (ppbv) |
|---------------|--------------------|---------------|------------|--------------|---------------|-------------|----------------|--------------|--------------|---------------|-------------|--------------|
| 15            | 1625.29            | 13.39         | 17.25      | 3.10         | 15.79         | 33.74       | 335.37         | 44.70        | 57.19        | 83.25         | 335.68      | 345.85       |
| 18            | 1483.33            | 1.90          | 21.53      | 2.92         | 5.15          | 73.36       | 328.90         | 35.49        | 31.96        | 67.14         | 334.41      | 341.08       |
| 21            | 1202.93            | 1.31          | 26.56      | 1.40         | 7.05          | 70.23       | 289.32         | 24.12        | 33.02        | 65.44         | 294.60      | 301.78       |
| 24            | 1060.73            | 1.51          | 20.29      | 1.58         | 6.55          | 37.79       | 241.64         | 20.98        | 33.54        | 51.64         | 243.25      | 248.68       |
| 27            | 849.96             | 1.24          | 16.12      | 1.34         | 7.70          | 17.44       | 203.32         | 19.09        | 35.99        | 53.81         | 201.82      | 208.87       |
| 30            | 610.47             | 1.17          | 12.53      | 1.38         | 6.32          | 14.84       | 153.09         | 16.47        | 26.93        | 54.25         | 148.02      | 157.65       |
| 33            | 351.31             | 1.18          | 3.93       | 1.11         | 3.87          | 9.90        | 92.06          | 10.57        | 24.39        | 46.31         | 84.66       | 96.50        |
| 36            | 217.74             | 1.06          | 4.88       | 1.09         | 2.85          | 8.58        | 60.78          | 5.03         | 20.18        | 41.10         | 50.46       | 65.08        |
| 39            | 141.18             | 0.79          | 5.41       | 0.84         | 2.18          | 7.99        | 42.63          | 2.90         | 15.92        | 35.90         | 29.83       | 46.68        |
| 42            | 165.10             | 0.54          | 6.52       | 0.94         | 2.23          | 11.35       | 49.28          | 3.01         | 12.56        | 36.98         | 37.49       | 52.66        |
| 45            | 193.34             | 0.30          | 5.33       | 0.48         | 2.05          | 11.16       | 49.86          | 3.18         | 11.10        | 28.03         | 44.63       | 52.70        |
| 48            | 218.01             | 0.48          | 3.49       | 0.57         | 2.80          | 13.09       | 50.20          | 4.08         | 11.00        | 19.25         | 49.79       | 53.38        |
| 52            | 238.04             | 0.36          | 2.52       | 0.39         | 2.43          | 10.58       | 55.24          | 3.95         | 9.07         | 16.55         | 54.77       | 57.22        |
| 56            | 207.74             | 0.30          | 1.36       | 0.48         | 1.35          | 4.83        | 50.29          | 3.70         | 8.51         | 16.75         | 48.60       | 51.41        |
| 60            | 154.35             | 0.24          | 1.31       | 0.29         | 1.15          | 2.80        | 38.76          | 3.17         | 9.46         | 15.86         | 36.90       | 40.16        |
| 64            | 92.18              | 0.26          | 1.08       | 0.20         | 1.74          | 1.60        | 24.30          | 1.89         | 11.14        | 14.04         | 22.98       | 26.93        |
| 68            | 55.72              | 0.36          | 1.18       | 0.47         | 4.15          | 3.73        | 18.23          | 1.69         | 19.92        | 22.32         | 16.32       | 27.65        |

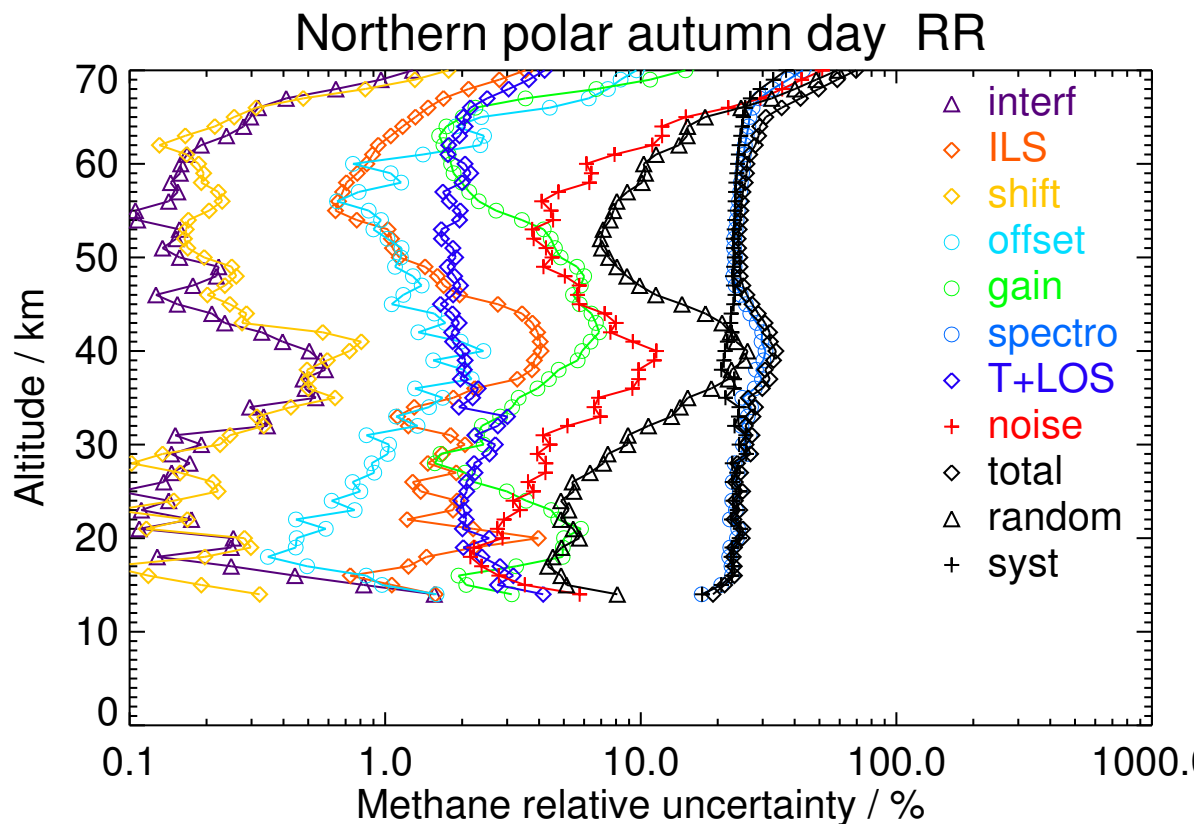

**Figure S41.** V8R\_CH4\_261 Northern polar autumn day

**Table S42.** Methane error budget for Northern polar autumn night. All uncertainties are  $1\sigma$ .

| altitude (km) | mean target (ppbv) | interf (ppbv) | ILS (ppbv) | shift (ppbv) | offset (ppbv) | gain (ppbv) | spectro (ppbv) | T+LOS (ppbv) | noise (ppbv) | random (ppbv) | syst (ppbv) | total (ppbv) |
|---------------|--------------------|---------------|------------|--------------|---------------|-------------|----------------|--------------|--------------|---------------|-------------|--------------|
| 15            | 1607.53            | 12.78         | 16.63      | 3.29         | 16.27         | 29.92       | 343.01         | 45.05        | 57.16        | 90.79         | 341.06      | 352.94       |
| 18            | 1444.75            | 2.08          | 22.89      | 3.27         | 6.14          | 79.97       | 344.88         | 34.66        | 32.89        | 66.97         | 351.72      | 358.04       |
| 21            | 1222.63            | 1.46          | 21.52      | 1.40         | 7.00          | 63.68       | 310.07         | 23.08        | 33.50        | 56.30         | 314.96      | 319.95       |
| 24            | 1038.56            | 1.86          | 20.65      | 1.36         | 6.20          | 34.59       | 247.24         | 20.01        | 32.10        | 49.94         | 248.45      | 253.42       |
| 27            | 818.56             | 1.47          | 14.15      | 1.28         | 7.71          | 16.48       | 205.54         | 18.67        | 36.59        | 58.09         | 202.72      | 210.88       |
| 30            | 580.08             | 1.69          | 13.19      | 1.99         | 5.99          | 17.29       | 146.08         | 15.21        | 25.83        | 53.19         | 141.15      | 150.84       |
| 33            | 401.45             | 1.48          | 4.01       | 2.46         | 3.73          | 16.57       | 112.48         | 10.04        | 23.71        | 70.59         | 92.97       | 116.73       |
| 36            | 285.76             | 1.26          | 6.08       | 1.51         | 2.95          | 8.69        | 86.28          | 5.55         | 21.44        | 63.97         | 62.98       | 89.77        |
| 39            | 214.44             | 1.48          | 7.52       | 1.51         | 2.41          | 9.03        | 69.11          | 3.79         | 17.64        | 56.79         | 44.99       | 72.46        |
| 42            | 194.75             | 0.97          | 8.32       | 1.36         | 2.48          | 12.23       | 60.98          | 3.44         | 13.55        | 47.67         | 43.24       | 64.36        |
| 45            | 188.97             | 0.26          | 5.00       | 0.50         | 1.98          | 9.56        | 51.75          | 3.09         | 11.25        | 30.27         | 44.93       | 54.17        |
| 48            | 205.26             | 0.29          | 5.19       | 0.60         | 2.51          | 11.86       | 51.26          | 3.95         | 10.09        | 22.51         | 49.12       | 54.03        |
| 52            | 220.89             | 0.28          | 3.41       | 0.39         | 2.05          | 9.00        | 51.72          | 3.47         | 7.97         | 14.21         | 51.44       | 53.37        |
| 56            | 204.59             | 0.22          | 1.88       | 0.54         | 1.31          | 6.02        | 50.20          | 3.45         | 7.77         | 15.56         | 48.90       | 51.32        |
| 60            | 152.72             | 0.09          | 1.40       | 0.25         | 1.15          | 3.81        | 39.77          | 3.09         | 8.90         | 16.44         | 37.66       | 41.09        |
| 64            | 102.47             | 0.25          | 0.97       | 0.41         | 1.84          | 1.70        | 30.49          | 2.18         | 11.12        | 18.01         | 27.23       | 32.64        |
| 68            | 79.35              | 0.34          | 1.64       | 1.06         | 4.26          | 3.19        | 29.07          | 2.43         | 20.55        | 26.76         | 24.27       | 36.13        |

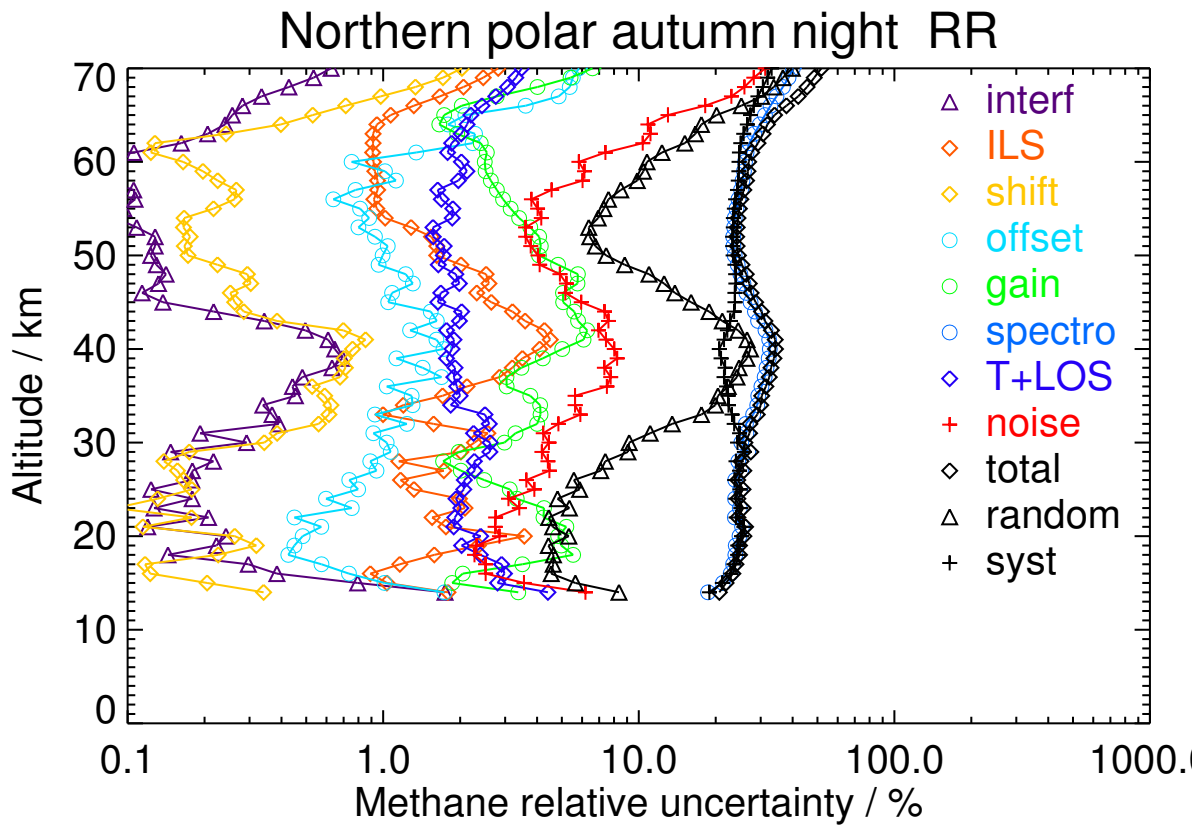

**Figure S42.** V8R\_CH4\_261 Northern polar autumn night

**Table S43.** Methane error budget for Northern midlatitude winter day. All uncertainties are  $1\sigma$ .

| altitude<br>(km) | mean target<br>(ppbv) | interf<br>(ppbv) | ILS<br>(ppbv) | shift<br>(ppbv) | offset<br>(ppbv) | gain<br>(ppbv) | spectro<br>(ppbv) | T+LOS<br>(ppbv) | noise<br>(ppbv) | random<br>(ppbv) | syst<br>(ppbv) | total<br>(ppbv) |
|------------------|-----------------------|------------------|---------------|-----------------|------------------|----------------|-------------------|-----------------|-----------------|------------------|----------------|-----------------|
| 12               | 1771.39               | 11.84            | 17.03         | 2.37            | 22.35            | 40.10          | 398.81            | 52.43           | 90.91           | 115.01           | 399.22         | 415.46          |
| 15               | 1658.32               | 5.65             | 53.73         | 2.50            | 11.67            | 50.97          | 351.47            | 37.82           | 44.54           | 82.38            | 354.71         | 364.15          |
| 18               | 1608.30               | 3.36             | 53.99         | 3.04            | 11.29            | 103.58         | 385.27            | 39.97           | 37.02           | 96.98            | 394.70         | 406.44          |
| 21               | 1345.93               | 1.50             | 48.98         | 1.82            | 4.61             | 37.34          | 339.38            | 27.40           | 35.87           | 70.68            | 340.65         | 347.91          |
| 24               | 1289.13               | 1.26             | 36.02         | 1.91            | 6.04             | 27.02          | 311.54            | 21.44           | 30.36           | 67.96            | 309.66         | 317.03          |
| 27               | 1141.01               | 0.93             | 19.98         | 3.36            | 8.00             | 16.09          | 266.86            | 22.01           | 36.69           | 64.97            | 263.74         | 271.63          |
| 30               | 1155.91               | 1.07             | 47.51         | 2.65            | 6.12             | 28.86          | 262.06            | 19.31           | 24.58           | 59.59            | 263.13         | 269.79          |
| 33               | 1005.04               | 1.46             | 17.57         | 5.25            | 6.11             | 27.73          | 222.84            | 15.62           | 21.99           | 53.81            | 220.53         | 227.00          |
| 36               | 539.91                | 1.51             | 18.73         | 2.89            | 4.93             | 18.70          | 132.43            | 9.29            | 18.01           | 54.23            | 125.47         | 136.68          |
| 39               | 355.20                | 0.99             | 13.86         | 1.65            | 4.07             | 15.18          | 78.00             | 5.61            | 15.84           | 31.81            | 76.14          | 82.52           |
| 42               | 308.15                | 0.61             | 15.30         | 1.67            | 3.77             | 19.54          | 71.60             | 4.81            | 13.78           | 28.83            | 71.71          | 77.29           |
| 45               | 282.22                | 0.50             | 10.83         | 1.38            | 2.86             | 13.52          | 65.51             | 4.26            | 12.60           | 23.70            | 64.95          | 69.13           |
| 48               | 251.39                | 0.45             | 5.50          | 1.11            | 2.47             | 10.19          | 57.11             | 3.97            | 10.30           | 19.40            | 56.12          | 59.38           |
| 52               | 194.72                | 0.25             | 2.02          | 0.59            | 1.80             | 5.12           | 44.48             | 3.12            | 8.11            | 12.52            | 43.94          | 45.69           |
| 56               | 181.61                | 0.25             | 2.77          | 0.44            | 1.61             | 3.21           | 42.88             | 3.20            | 8.86            | 12.05            | 42.46          | 44.13           |
| 60               | 185.36                | 0.30             | 3.05          | 0.50            | 2.01             | 2.89           | 43.67             | 3.83            | 12.41           | 15.17            | 43.21          | 45.80           |
| 64               | 152.47                | 0.50             | 1.56          | 1.00            | 3.40             | 4.10           | 41.06             | 3.74            | 17.81           | 21.46            | 39.85          | 45.26           |
| 68               | 86.85                 | 1.03             | 4.06          | 2.20            | 5.05             | 12.63          | 44.63             | 3.61            | 25.14           | 33.00            | 41.90          | 53.33           |

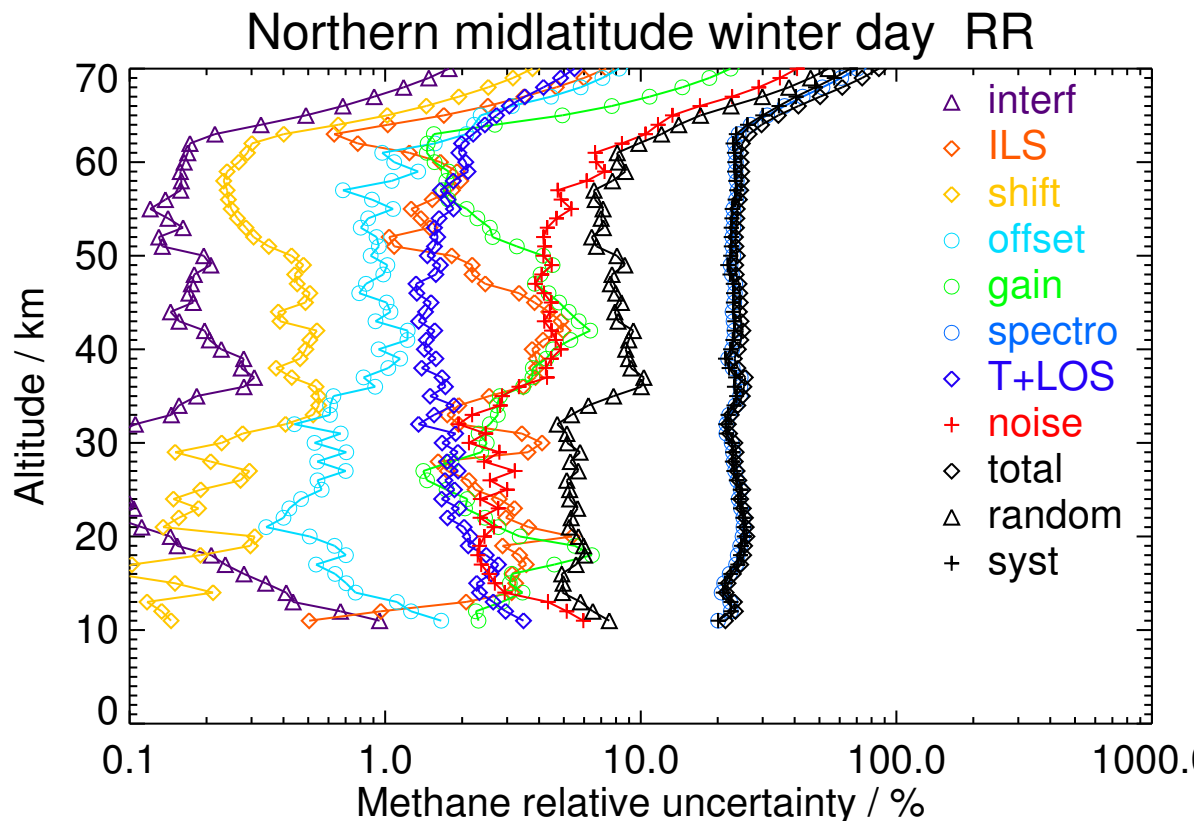

**Figure S43.** V8R\_CH4\_261 Northern midlatitude winter day

**Table S44.** Methane error budget for Northern midlatitude winter night. All uncertainties are  $1\sigma$ .

| altitude<br>(km) | mean target<br>(ppbv) | interf<br>(ppbv) | ILS<br>(ppbv) | shift<br>(ppbv) | offset<br>(ppbv) | gain<br>(ppbv) | spectro<br>(ppbv) | T+LOS<br>(ppbv) | noise<br>(ppbv) | random<br>(ppbv) | syst<br>(ppbv) | total<br>(ppbv) |
|------------------|-----------------------|------------------|---------------|-----------------|------------------|----------------|-------------------|-----------------|-----------------|------------------|----------------|-----------------|
| 12               | 1855.06               | 10.10            | 27.38         | 2.04            | 23.62            | 53.02          | 424.54            | 55.25           | 89.48           | 117.88           | 426.18         | 442.18          |
| 15               | 1745.37               | 5.65             | 49.65         | 2.71            | 12.20            | 48.75          | 353.15            | 39.84           | 44.33           | 76.72            | 356.95         | 365.10          |
| 18               | 1614.13               | 2.85             | 47.85         | 3.22            | 9.50             | 84.45          | 366.32            | 36.66           | 34.91           | 95.39            | 370.39         | 382.47          |
| 21               | 1368.28               | 1.62             | 56.29         | 2.00            | 5.52             | 33.39          | 350.83            | 29.47           | 37.45           | 73.81            | 352.45         | 360.10          |
| 24               | 1296.39               | 1.20             | 33.40         | 1.27            | 6.10             | 18.34          | 317.93            | 21.56           | 31.37           | 60.38            | 316.82         | 322.52          |
| 27               | 1150.42               | 1.03             | 18.07         | 3.75            | 8.45             | 12.72          | 268.20            | 22.82           | 37.69           | 63.72            | 265.31         | 272.85          |
| 30               | 1114.08               | 1.12             | 49.05         | 1.69            | 5.72             | 22.20          | 255.05            | 18.54           | 23.45           | 56.06            | 256.39         | 262.45          |
| 33               | 938.76                | 1.58             | 10.63         | 5.93            | 5.62             | 22.73          | 210.52            | 14.01           | 21.06           | 54.01            | 206.73         | 213.67          |
| 36               | 547.02                | 1.66             | 16.35         | 2.53            | 4.92             | 13.64          | 127.02            | 8.81            | 17.61           | 51.82            | 119.67         | 130.41          |
| 39               | 357.96                | 0.86             | 14.16         | 1.73            | 3.86             | 15.34          | 80.87             | 5.23            | 14.37           | 29.54            | 79.72          | 85.02           |
| 42               | 303.18                | 0.57             | 12.27         | 1.68            | 3.45             | 16.56          | 71.52             | 4.40            | 12.21           | 26.17            | 70.98          | 75.65           |
| 45               | 301.96                | 0.43             | 12.27         | 1.56            | 2.74             | 15.26          | 71.63             | 4.21            | 10.80           | 26.26            | 70.49          | 75.22           |
| 48               | 249.62                | 0.34             | 4.45          | 1.15            | 1.90             | 7.56           | 56.78             | 3.31            | 8.48            | 16.86            | 55.72          | 58.21           |
| 52               | 180.09                | 0.28             | 2.57          | 0.53            | 1.46             | 3.32           | 40.93             | 2.75            | 6.90            | 10.83            | 40.41          | 41.84           |
| 56               | 171.03                | 0.28             | 2.83          | 0.29            | 1.47             | 1.95           | 39.32             | 3.00            | 8.24            | 10.31            | 39.12          | 40.46           |
| 60               | 168.61                | 0.32             | 2.92          | 0.58            | 2.01             | 2.42           | 39.53             | 3.72            | 12.37           | 14.34            | 39.28          | 41.81           |
| 64               | 151.36                | 0.47             | 1.83          | 1.20            | 3.55             | 3.44           | 40.37             | 3.83            | 18.16           | 22.28            | 38.82          | 44.76           |
| 68               | 120.10                | 0.81             | 5.24          | 2.41            | 4.58             | 9.61           | 41.95             | 3.67            | 24.66           | 31.10            | 39.51          | 50.28           |

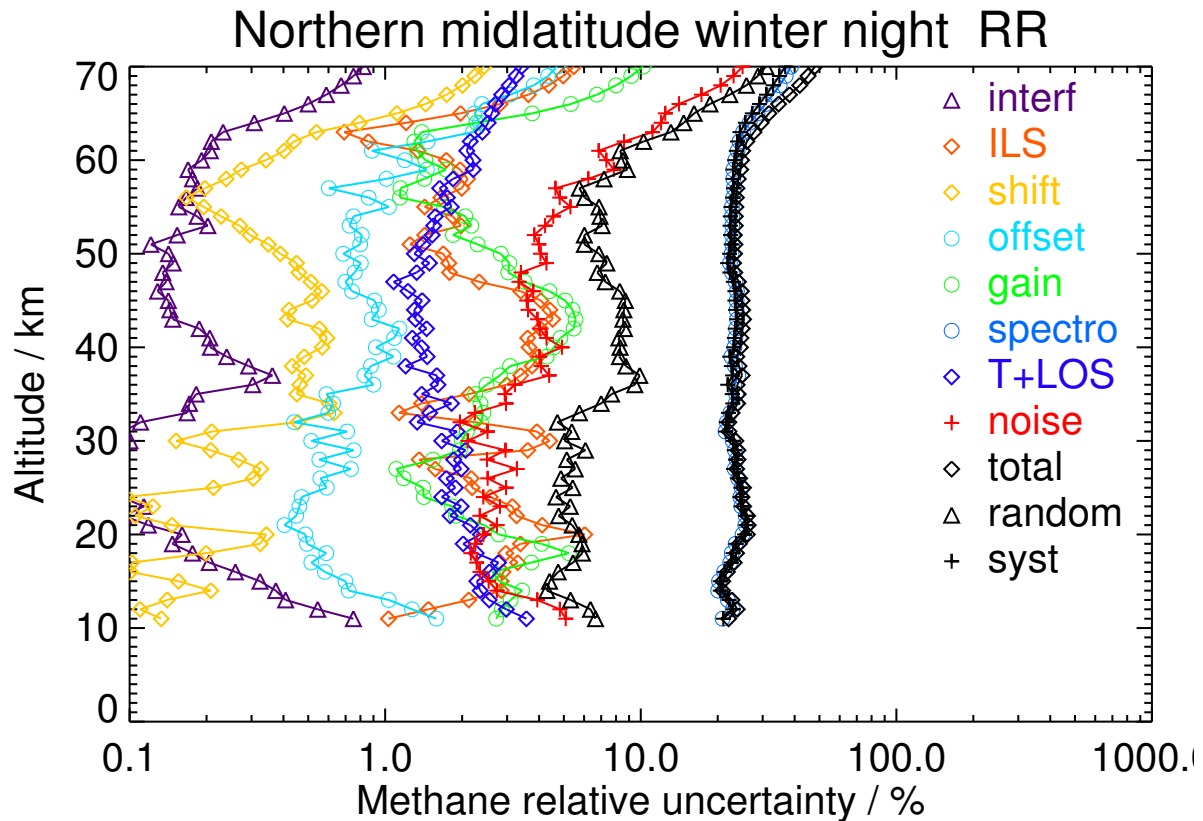**Figure S44.** V8R\_CH4\_261 Northern midlatitude winter night

**Table S45.** Methane error budget for Northern midlatitude spring day. All uncertainties are  $1\sigma$ .

| altitude<br>(km) | mean target<br>(ppbv) | interf<br>(ppbv) | ILS<br>(ppbv) | shift<br>(ppbv) | offset<br>(ppbv) | gain<br>(ppbv) | spectro<br>(ppbv) | T+LOS<br>(ppbv) | noise<br>(ppbv) | random<br>(ppbv) | syst<br>(ppbv) | total<br>(ppbv) |
|------------------|-----------------------|------------------|---------------|-----------------|------------------|----------------|-------------------|-----------------|-----------------|------------------|----------------|-----------------|
| 12               | 1796.90               | 8.00             | 18.14         | 2.01            | 12.70            | 55.69          | 416.30            | 46.35           | 61.43           | 92.13            | 417.61         | 427.66          |
| 15               | 1750.56               | 6.16             | 42.90         | 2.49            | 11.80            | 55.27          | 366.26            | 43.30           | 46.18           | 87.41            | 368.23         | 378.46          |
| 18               | 1628.81               | 3.32             | 57.36         | 3.80            | 12.23            | 123.82         | 362.25            | 42.31           | 38.41           | 97.16            | 379.27         | 391.52          |
| 21               | 1318.12               | 1.48             | 30.76         | 2.16            | 5.64             | 57.53          | 314.65            | 27.89           | 35.45           | 73.34            | 316.15         | 324.55          |
| 24               | 1163.23               | 1.01             | 18.96         | 2.15            | 7.09             | 19.70          | 282.98            | 22.88           | 36.35           | 55.10            | 282.29         | 287.62          |
| 27               | 1114.52               | 0.88             | 9.95          | 2.68            | 6.51             | 16.02          | 251.80            | 19.89           | 32.56           | 57.05            | 249.02         | 255.47          |
| 30               | 1021.05               | 1.02             | 39.99         | 2.58            | 7.19             | 22.66          | 243.12            | 21.12           | 29.11           | 65.96            | 241.30         | 250.15          |
| 33               | 750.46                | 1.12             | 9.17          | 2.36            | 5.40             | 18.11          | 165.83            | 14.10           | 23.17           | 48.24            | 162.35         | 169.36          |
| 36               | 476.08                | 1.60             | 9.08          | 2.43            | 4.38             | 10.97          | 105.70            | 7.56            | 19.29           | 40.42            | 100.99         | 108.78          |
| 39               | 386.99                | 1.24             | 7.62          | 1.93            | 3.75             | 12.93          | 85.03             | 5.09            | 16.54           | 31.94            | 82.18          | 88.17           |
| 42               | 358.98                | 0.69             | 14.40         | 1.85            | 3.31             | 17.94          | 86.25             | 4.67            | 13.59           | 30.73            | 85.12          | 90.50           |
| 45               | 285.97                | 0.38             | 9.59          | 1.12            | 2.72             | 15.96          | 72.99             | 4.13            | 11.30           | 31.80            | 69.40          | 76.34           |
| 48               | 282.17                | 0.52             | 7.23          | 1.43            | 2.72             | 15.77          | 69.99             | 4.28            | 9.52            | 27.95            | 67.36          | 72.93           |
| 52               | 211.29                | 0.34             | 2.74          | 0.57            | 1.44             | 5.01           | 49.66             | 3.21            | 7.39            | 15.94            | 48.08          | 50.65           |
| 56               | 168.01                | 0.27             | 1.26          | 0.60            | 1.18             | 1.88           | 39.94             | 2.99            | 7.00            | 11.61            | 39.05          | 40.74           |
| 60               | 126.48                | 0.23             | 0.99          | 0.37            | 1.22             | 1.30           | 30.40             | 2.45            | 8.31            | 11.11            | 29.66          | 31.68           |
| 64               | 84.79                 | 0.30             | 0.81          | 0.34            | 2.07             | 1.70           | 21.69             | 1.82            | 11.33           | 12.83            | 21.11          | 24.70           |
| 68               | 35.99                 | 0.46             | 1.66          | 0.85            | 4.01             | 6.73           | 18.29             | 1.62            | 19.27           | 21.12            | 18.09          | 27.81           |

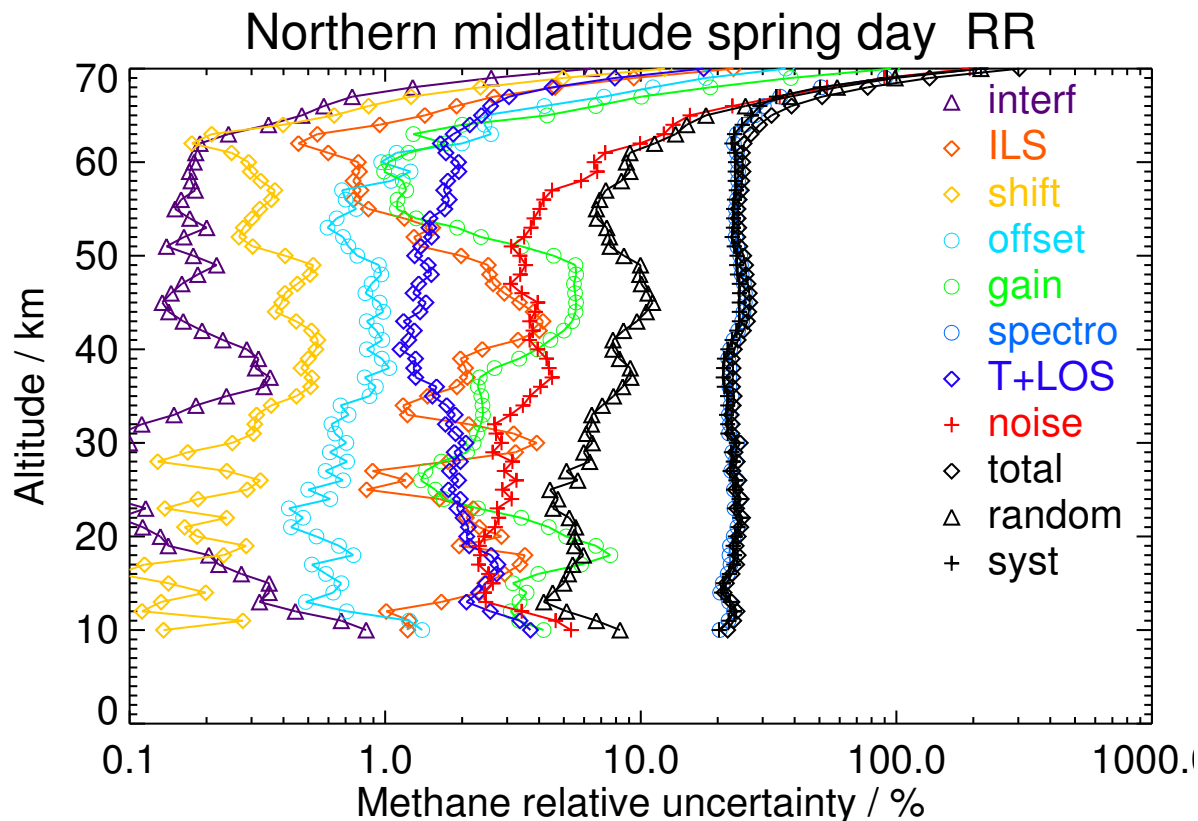

**Figure S45.** V8R\_CH4\_261 Northern midlatitude spring day



**Table S46.** Methane error budget for Northern midlatitude spring night. All uncertainties are  $1\sigma$ .

| altitude<br>(km) | mean target<br>(ppbv) | interf<br>(ppbv) | ILS<br>(ppbv) | shift<br>(ppbv) | offset<br>(ppbv) | gain<br>(ppbv) | spectro<br>(ppbv) | T+LOS<br>(ppbv) | noise<br>(ppbv) | random<br>(ppbv) | syst<br>(ppbv) | total<br>(ppbv) |
|------------------|-----------------------|------------------|---------------|-----------------|------------------|----------------|-------------------|-----------------|-----------------|------------------|----------------|-----------------|
| 12               | 1831.94               | 8.71             | 15.87         | 2.08            | 16.42            | 52.67          | 406.14            | 49.46           | 68.65           | 93.40            | 408.36         | 418.91          |
| 15               | 1663.92               | 6.16             | 39.44         | 2.60            | 11.72            | 51.22          | 338.50            | 40.94           | 44.81           | 75.67            | 341.91         | 350.18          |
| 18               | 1579.18               | 3.39             | 46.13         | 3.19            | 10.51            | 107.01         | 359.58            | 35.55           | 35.90           | 91.41            | 370.41         | 381.52          |
| 21               | 1330.25               | 1.46             | 35.02         | 2.69            | 5.98             | 58.83          | 326.91            | 26.54           | 33.99           | 73.84            | 328.65         | 336.84          |
| 24               | 1176.24               | 1.09             | 16.97         | 2.10            | 6.36             | 28.61          | 279.96            | 21.87           | 34.62           | 55.96            | 279.42         | 284.96          |
| 27               | 1110.07               | 0.87             | 10.86         | 2.67            | 6.70             | 13.57          | 257.44            | 20.71           | 33.65           | 54.29            | 255.43         | 261.14          |
| 30               | 1005.99               | 0.77             | 39.82         | 2.08            | 6.61             | 17.70          | 235.50            | 20.68           | 27.93           | 49.40            | 237.01         | 242.11          |
| 33               | 740.02                | 1.47             | 9.04          | 3.13            | 5.29             | 16.88          | 165.80            | 12.94           | 22.54           | 42.54            | 163.59         | 169.03          |
| 36               | 492.56                | 1.64             | 12.39         | 2.56            | 4.69             | 12.52          | 113.83            | 7.82            | 19.32           | 42.22            | 109.32         | 117.19          |
| 39               | 382.28                | 1.19             | 10.60         | 1.86            | 3.86             | 12.93          | 85.73             | 5.28            | 16.35           | 33.23            | 82.70          | 89.13           |
| 42               | 342.26                | 0.59             | 12.59         | 1.69            | 3.33             | 17.96          | 82.76             | 4.76            | 13.15           | 33.41            | 80.15          | 86.83           |
| 45               | 262.88                | 0.35             | 8.01          | 1.06            | 2.38             | 13.73          | 65.34             | 3.85            | 10.58           | 31.06            | 60.76          | 68.24           |
| 48               | 243.51                | 0.30             | 4.98          | 0.86            | 2.04             | 10.20          | 57.37             | 3.43            | 8.09            | 20.59            | 55.48          | 59.18           |
| 52               | 203.90                | 0.21             | 1.58          | 0.56            | 1.46             | 5.46           | 47.18             | 2.96            | 6.73            | 13.18            | 46.27          | 48.11           |
| 56               | 172.24                | 0.25             | 1.41          | 0.57            | 1.30             | 2.46           | 41.46             | 2.93            | 7.08            | 11.25            | 40.75          | 42.28           |
| 60               | 138.98                | 0.27             | 1.00          | 0.49            | 1.60             | 1.95           | 34.72             | 2.83            | 9.29            | 11.81            | 34.18          | 36.16           |
| 64               | 86.17                 | 0.28             | 0.52          | 0.38            | 2.61             | 1.06           | 23.24             | 2.01            | 12.99           | 14.32            | 22.73          | 26.86           |
| 68               | 48.06                 | 0.45             | 1.22          | 0.96            | 4.02             | 5.64           | 20.97             | 1.90            | 19.80           | 22.21            | 19.81          | 29.76           |

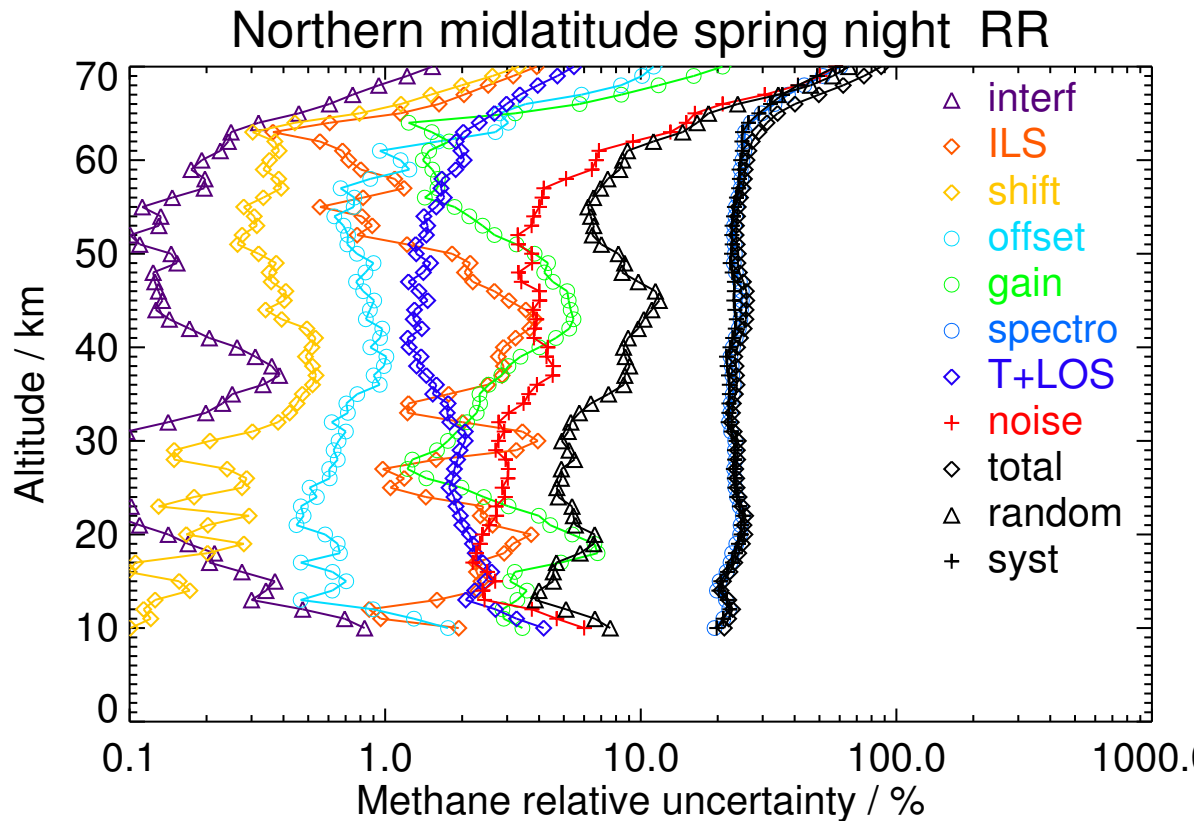**Figure S46.** V8R\_CH4\_261 Northern midlatitude spring night



**Table S47.** Methane error budget for Northern midlatitude summer day. All uncertainties are  $1\sigma$ .

| altitude<br>(km) | mean target<br>(ppbv) | interf<br>(ppbv) | ILS<br>(ppbv) | shift<br>(ppbv) | offset<br>(ppbv) | gain<br>(ppbv) | spectro<br>(ppbv) | T+LOS<br>(ppbv) | noise<br>(ppbv) | random<br>(ppbv) | syst<br>(ppbv) | total<br>(ppbv) |
|------------------|-----------------------|------------------|---------------|-----------------|------------------|----------------|-------------------|-----------------|-----------------|------------------|----------------|-----------------|
| 12               | 1979.46               | 7.43             | 26.08         | 1.73            | 11.51            | 73.08          | 432.96            | 47.32           | 53.54           | 74.11            | 439.63         | 445.84          |
| 15               | 1943.59               | 7.04             | 89.81         | 3.23            | 14.77            | 54.42          | 421.57            | 50.90           | 57.24           | 88.73            | 432.46         | 441.47          |
| 18               | 1862.12               | 4.25             | 35.11         | 2.62            | 13.59            | 61.33          | 439.47            | 53.12           | 48.06           | 88.00            | 442.40         | 451.07          |
| 21               | 1489.38               | 2.05             | 53.33         | 2.43            | 4.79             | 11.56          | 363.71            | 39.23           | 43.88           | 66.18            | 366.58         | 372.50          |
| 24               | 1255.82               | 1.10             | 17.57         | 0.84            | 4.83             | 20.51          | 303.57            | 20.30           | 30.02           | 42.95            | 303.93         | 306.96          |
| 27               | 1080.49               | 0.99             | 16.94         | 3.51            | 7.52             | 13.09          | 249.89            | 20.86           | 37.33           | 48.40            | 249.92         | 254.56          |
| 30               | 1132.70               | 1.15             | 46.85         | 1.45            | 5.42             | 23.63          | 263.35            | 17.98           | 23.79           | 35.89            | 267.84         | 270.24          |
| 33               | 918.77                | 0.84             | 8.97          | 4.13            | 5.72             | 22.90          | 191.57            | 13.37           | 22.02           | 36.44            | 191.55         | 194.98          |
| 36               | 742.26                | 2.19             | 9.51          | 3.76            | 5.20             | 16.92          | 153.07            | 9.22            | 18.82           | 31.73            | 152.59         | 155.86          |
| 39               | 511.21                | 1.91             | 15.26         | 2.50            | 4.21             | 15.77          | 110.90            | 6.29            | 15.81           | 27.67            | 111.05         | 114.45          |
| 42               | 413.41                | 0.88             | 17.70         | 3.02            | 4.01             | 22.58          | 98.50             | 5.37            | 13.17           | 28.79            | 99.62          | 103.70          |
| 45               | 362.97                | 0.53             | 18.50         | 1.63            | 3.31             | 22.98          | 92.92             | 5.03            | 11.51           | 34.35            | 92.17          | 98.37           |
| 48               | 279.19                | 0.41             | 8.50          | 1.49            | 2.42             | 13.66          | 71.65             | 4.04            | 9.30            | 35.33            | 65.24          | 74.19           |
| 52               | 275.75                | 0.46             | 3.43          | 1.19            | 1.87             | 6.76           | 67.59             | 3.91            | 7.75            | 29.63            | 61.87          | 68.60           |
| 56               | 240.66                | 0.48             | 3.44          | 0.73            | 1.43             | 2.55           | 59.65             | 4.16            | 8.08            | 26.40            | 54.45          | 60.51           |
| 60               | 216.66                | 0.38             | 4.43          | 0.68            | 1.52             | 2.41           | 51.64             | 4.38            | 10.35           | 19.53            | 49.39          | 53.11           |
| 64               | 221.89                | 0.46             | 1.72          | 0.70            | 2.93             | 2.38           | 54.24             | 4.24            | 15.19           | 21.52            | 52.40          | 56.65           |
| 68               | 212.21                | 0.68             | 5.47          | 1.59            | 4.68             | 8.29           | 57.38             | 3.84            | 25.07           | 30.01            | 56.21          | 63.71           |

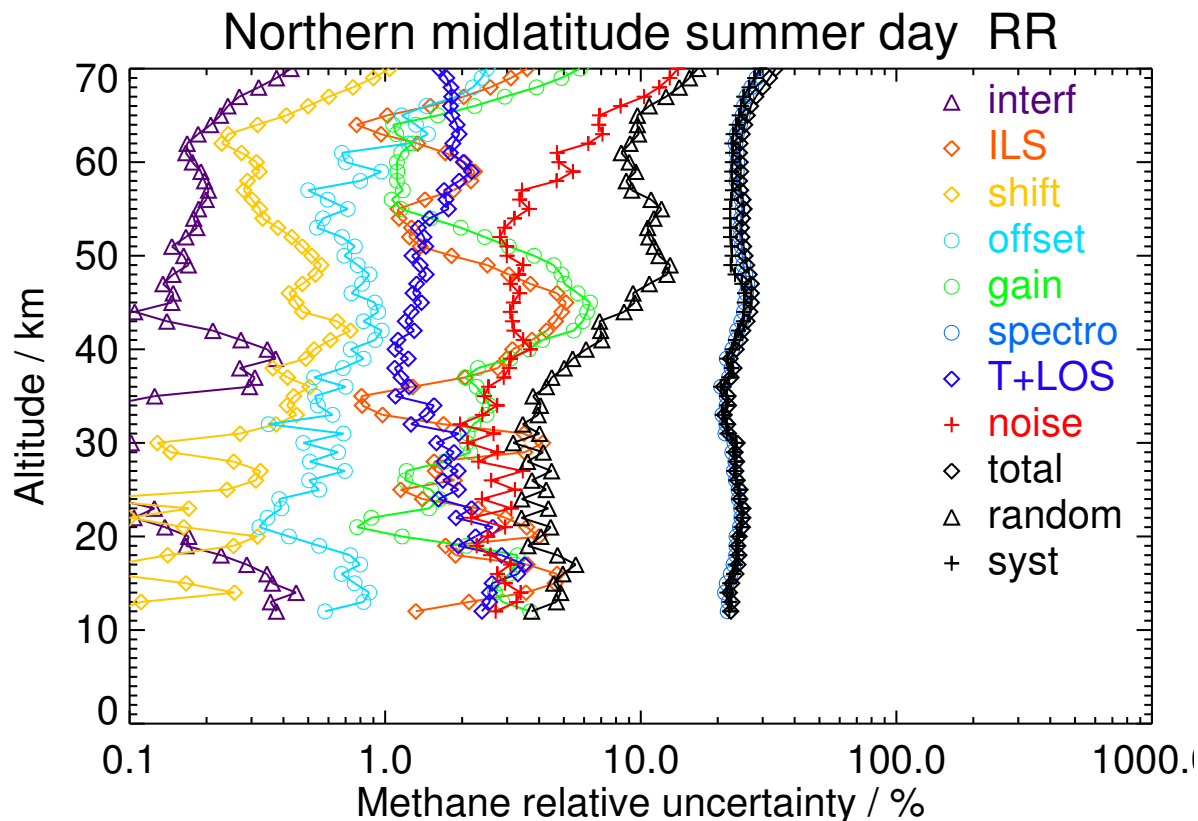

**Figure S47.** V8R\_CH4\_261 Northern midlatitude summer day

**Table S48.** Methane error budget for Northern midlatitude summer night. All uncertainties are  $1\sigma$ .

| altitude (km) | mean target (ppbv) | interf (ppbv) | ILS (ppbv) | shift (ppbv) | offset (ppbv) | gain (ppbv) | spectro (ppbv) | T+LOS (ppbv) | noise (ppbv) | random (ppbv) | syst (ppbv) | total (ppbv) |
|---------------|--------------------|---------------|------------|--------------|---------------|-------------|----------------|--------------|--------------|---------------|-------------|--------------|
| 12            | 1989.61            | 9.64          | 22.62      | 1.98         | 20.12         | 74.83       | 413.27         | 62.22        | 81.39        | 115.87        | 417.70      | 433.48       |
| 15            | 1914.42            | 8.13          | 63.31      | 3.38         | 14.94         | 47.01       | 353.97         | 50.58        | 59.59        | 91.17         | 360.02      | 371.38       |
| 18            | 1763.36            | 4.15          | 27.83      | 2.65         | 6.94          | 34.15       | 384.60         | 37.99        | 41.32        | 74.49         | 384.10      | 391.25       |
| 21            | 1479.37            | 2.12          | 59.55      | 1.87         | 5.62          | 11.49       | 365.63         | 36.72        | 40.93        | 63.26         | 369.36      | 374.74       |
| 24            | 1258.32            | 1.10          | 21.43      | 1.06         | 5.49          | 19.78       | 307.32         | 22.50        | 31.97        | 46.55         | 307.72      | 311.22       |
| 27            | 1104.63            | 0.87          | 15.50      | 3.35         | 6.79          | 16.05       | 251.86         | 20.99        | 33.95        | 47.45         | 251.65      | 256.09       |
| 30            | 1093.54            | 1.14          | 44.49      | 1.57         | 5.52          | 20.52       | 249.59         | 19.22        | 24.27        | 38.57         | 253.38      | 256.30       |
| 33            | 899.75             | 1.14          | 14.31      | 4.04         | 5.40          | 19.37       | 188.47         | 14.32        | 21.71        | 40.67         | 187.53      | 191.89       |
| 36            | 722.27             | 2.22          | 14.37      | 3.60         | 4.93          | 12.65       | 153.35         | 9.95         | 19.16        | 35.43         | 152.10      | 156.17       |
| 39            | 472.12             | 1.78          | 13.57      | 2.65         | 3.96          | 11.31       | 103.11         | 6.65         | 16.54        | 31.02         | 101.61      | 106.24       |
| 42            | 389.90             | 0.79          | 13.03      | 2.06         | 3.44          | 17.29       | 88.32          | 5.12         | 13.18        | 31.70         | 86.49       | 92.12        |
| 45            | 340.87             | 0.46          | 10.13      | 1.32         | 2.84          | 18.20       | 80.03          | 4.80         | 10.92        | 29.33         | 78.31       | 83.62        |
| 48            | 325.79             | 0.39          | 7.20       | 1.70         | 2.45          | 14.68       | 76.33          | 4.39         | 8.82         | 29.57         | 72.98       | 78.74        |
| 52            | 267.15             | 0.39          | 3.87       | 1.41         | 1.73          | 7.10        | 66.69          | 4.03         | 7.87         | 32.47         | 59.51       | 67.80        |
| 56            | 215.73             | 0.31          | 2.31       | 0.69         | 1.42          | 2.75        | 53.09          | 4.07         | 7.99         | 21.26         | 49.62       | 53.98        |
| 60            | 212.27             | 0.34          | 3.46       | 0.55         | 1.65          | 2.84        | 52.11          | 4.28         | 10.35        | 19.37         | 49.89       | 53.52        |
| 64            | 187.98             | 0.40          | 1.17       | 0.66         | 2.85          | 2.14        | 50.19          | 4.03         | 14.46        | 21.52         | 47.92       | 52.53        |
| 68            | 184.32             | 0.65          | 3.94       | 1.77         | 4.42          | 7.79        | 53.75          | 4.50         | 23.67        | 28.80         | 52.33       | 59.74        |

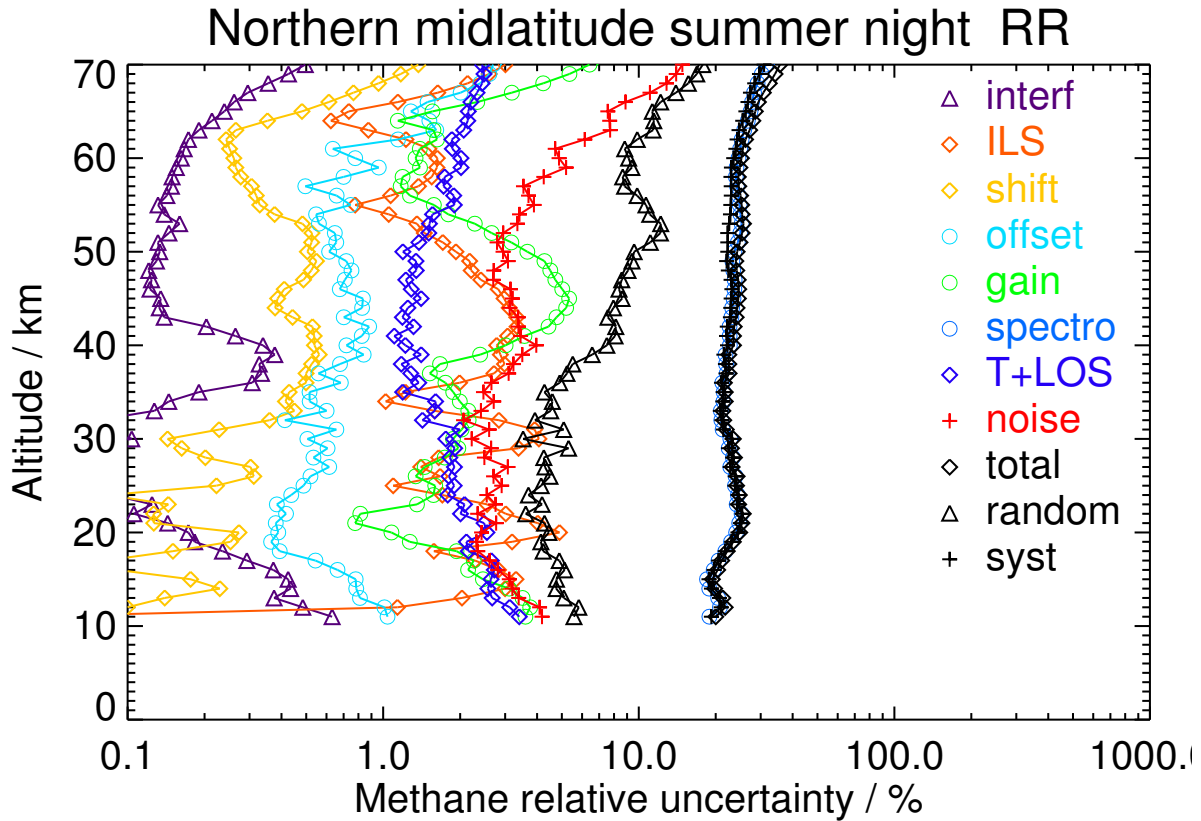

**Figure S48.** V8R\_CH4\_261 Northern midlatitude summer night

**Table S49.** Methane error budget for Northern midlatitude autumn day. All uncertainties are  $1\sigma$ .

| altitude<br>(km) | mean target<br>(ppbv) | interf<br>(ppbv) | ILS<br>(ppbv) | shift<br>(ppbv) | offset<br>(ppbv) | gain<br>(ppbv) | spectro<br>(ppbv) | T+LOS<br>(ppbv) | noise<br>(ppbv) | random<br>(ppbv) | syst<br>(ppbv) | total<br>(ppbv) |
|------------------|-----------------------|------------------|---------------|-----------------|------------------|----------------|-------------------|-----------------|-----------------|------------------|----------------|-----------------|
| 12               | 1915.65               | 6.24             | 25.02         | 1.43            | 11.14            | 67.91          | 408.48            | 42.94           | 50.29           | 68.62            | 414.64         | 420.28          |
| 15               | 1857.96               | 6.73             | 71.80         | 2.68            | 18.33            | 58.23          | 406.63            | 55.03           | 68.26           | 111.47           | 411.76         | 426.58          |
| 18               | 1789.51               | 2.84             | 29.60         | 2.73            | 9.44             | 62.68          | 415.69            | 41.77           | 39.96           | 76.33            | 418.60         | 425.50          |
| 21               | 1470.25               | 1.71             | 70.07         | 3.04            | 6.01             | 13.50          | 369.46            | 35.10           | 40.98           | 66.17            | 374.40         | 380.20          |
| 24               | 1238.53               | 1.12             | 29.55         | 1.72            | 5.66             | 14.79          | 301.38            | 21.44           | 30.94           | 48.80            | 301.65         | 305.57          |
| 27               | 1082.13               | 0.88             | 25.15         | 3.32            | 8.45             | 11.93          | 259.18            | 22.61           | 41.11           | 53.87            | 259.48         | 265.02          |
| 30               | 1080.83               | 0.95             | 42.10         | 1.01            | 5.89             | 20.36          | 250.83            | 19.25           | 27.15           | 42.20            | 253.90         | 257.38          |
| 33               | 948.92                | 0.79             | 14.18         | 4.49            | 7.19             | 20.98          | 204.63            | 14.70           | 27.61           | 44.52            | 203.92         | 208.72          |
| 36               | 878.11                | 1.93             | 7.62          | 3.41            | 6.71             | 18.71          | 183.45            | 11.10           | 25.00           | 40.07            | 182.39         | 186.74          |
| 39               | 673.92                | 2.33             | 14.48         | 3.79            | 5.83             | 15.55          | 139.40            | 8.38            | 22.96           | 41.33            | 137.21         | 143.30          |
| 42               | 627.97                | 1.55             | 18.53         | 2.82            | 5.44             | 23.40          | 130.31            | 7.30            | 20.35           | 36.78            | 130.48         | 135.57          |
| 45               | 492.58                | 0.49             | 19.15         | 1.49            | 4.57             | 27.87          | 113.89            | 7.29            | 16.69           | 34.39            | 115.27         | 120.29          |
| 48               | 412.56                | 0.56             | 13.75         | 2.34            | 4.03             | 21.60          | 93.58             | 7.06            | 13.61           | 25.36            | 95.01          | 98.34           |
| 52               | 346.00                | 0.40             | 4.18          | 1.57            | 2.66             | 9.31           | 76.18             | 6.03            | 11.02           | 18.72            | 75.67          | 77.95           |
| 56               | 296.41                | 0.42             | 3.20          | 0.78            | 1.90             | 2.52           | 66.73             | 6.24            | 11.07           | 14.77            | 66.46          | 68.08           |
| 60               | 257.11                | 0.42             | 3.45          | 0.55            | 1.96             | 2.11           | 59.53             | 6.00            | 13.11           | 16.34            | 59.20          | 61.42           |
| 64               | 213.35                | 0.41             | 1.09          | 0.60            | 3.12             | 2.42           | 51.52             | 4.91            | 16.13           | 20.50            | 50.35          | 54.37           |
| 68               | 136.62                | 0.44             | 2.95          | 0.86            | 4.46             | 5.64           | 42.74             | 3.95            | 23.29           | 27.36            | 41.20          | 49.46           |

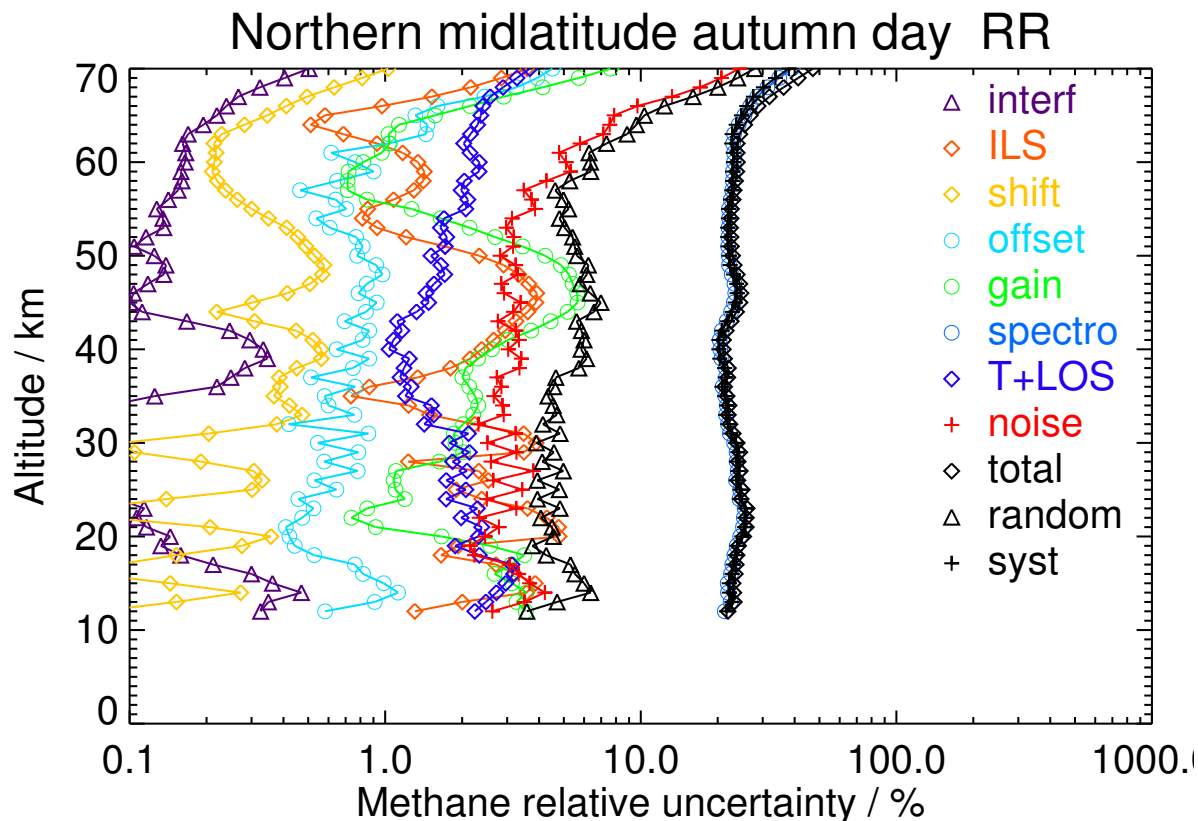

**Figure S49.** V8R\_CH4\_261 Northern midlatitude autumn day

**Table S50.** Methane error budget for Northern midlatitude autumn night. All uncertainties are  $1\sigma$ .

| altitude<br>(km) | mean target<br>(ppbv) | interf<br>(ppbv) | ILS<br>(ppbv) | shift<br>(ppbv) | offset<br>(ppbv) | gain<br>(ppbv) | spectro<br>(ppbv) | T+LOS<br>(ppbv) | noise<br>(ppbv) | random<br>(ppbv) | syst<br>(ppbv) | total<br>(ppbv) |
|------------------|-----------------------|------------------|---------------|-----------------|------------------|----------------|-------------------|-----------------|-----------------|------------------|----------------|-----------------|
| 12               | 1800.86               | 7.70             | 29.65         | 1.68            | 23.50            | 58.61          | 397.04            | 57.03           | 86.49           | 107.13           | 402.28         | 416.30          |
| 15               | 1877.60               | 6.13             | 59.23         | 2.09            | 18.93            | 54.32          | 380.71            | 56.57           | 66.92           | 105.56           | 385.15         | 399.35          |
| 18               | 1769.69               | 2.71             | 25.59         | 2.96            | 8.37             | 58.50          | 392.80            | 36.70           | 37.46           | 68.08            | 395.69         | 401.50          |
| 21               | 1446.90               | 1.66             | 51.13         | 2.37            | 6.04             | 35.92          | 359.78            | 32.24           | 40.32           | 75.18            | 361.12         | 368.86          |
| 24               | 1214.99               | 1.05             | 29.49         | 2.10            | 5.71             | 16.40          | 295.56            | 21.81           | 32.44           | 52.08            | 295.55         | 300.10          |
| 27               | 1083.36               | 0.86             | 23.31         | 2.89            | 7.95             | 13.05          | 258.18            | 21.89           | 38.55           | 56.05            | 257.42         | 263.45          |
| 30               | 1020.62               | 0.74             | 40.21         | 1.35            | 5.97             | 19.25          | 239.26            | 19.46           | 26.80           | 48.01            | 240.96         | 245.70          |
| 33               | 896.43                | 1.05             | 11.85         | 4.23            | 6.71             | 17.56          | 197.06            | 14.88           | 26.33           | 49.83            | 194.36         | 200.65          |
| 36               | 740.12                | 1.86             | 7.05          | 3.38            | 6.27             | 15.30          | 164.31            | 10.51           | 23.89           | 51.78            | 159.17         | 167.38          |
| 39               | 620.08                | 2.15             | 15.99         | 3.71            | 5.63             | 17.96          | 141.21            | 8.35            | 21.75           | 53.38            | 135.14         | 145.30          |
| 42               | 511.17                | 1.10             | 17.91         | 2.37            | 5.00             | 23.30          | 120.33            | 6.86            | 18.38           | 42.85            | 118.00         | 125.54          |
| 45               | 452.71                | 0.47             | 15.78         | 1.51            | 4.25             | 25.60          | 108.17            | 6.95            | 15.15           | 29.50            | 109.70         | 113.60          |
| 48               | 370.54                | 0.40             | 12.12         | 1.96            | 3.24             | 17.85          | 87.75             | 5.84            | 11.77           | 20.19            | 89.13          | 91.39           |
| 52               | 318.56                | 0.34             | 3.68          | 1.40            | 2.23             | 7.89           | 72.36             | 5.10            | 9.78            | 16.61            | 71.86          | 73.76           |
| 56               | 283.66                | 0.37             | 2.75          | 0.75            | 1.76             | 2.68           | 65.48             | 5.38            | 10.22           | 13.51            | 65.25          | 66.63           |
| 60               | 252.38                | 0.41             | 3.01          | 0.63            | 1.93             | 1.81           | 59.77             | 5.60            | 12.52           | 14.93            | 59.62          | 61.46           |
| 64               | 195.57                | 0.38             | 1.13          | 0.57            | 2.96             | 1.92           | 48.86             | 4.49            | 15.37           | 17.88            | 48.35          | 51.55           |
| 68               | 137.76                | 0.45             | 2.13          | 0.99            | 4.28             | 6.03           | 41.69             | 4.24            | 22.27           | 25.66            | 40.67          | 48.09           |

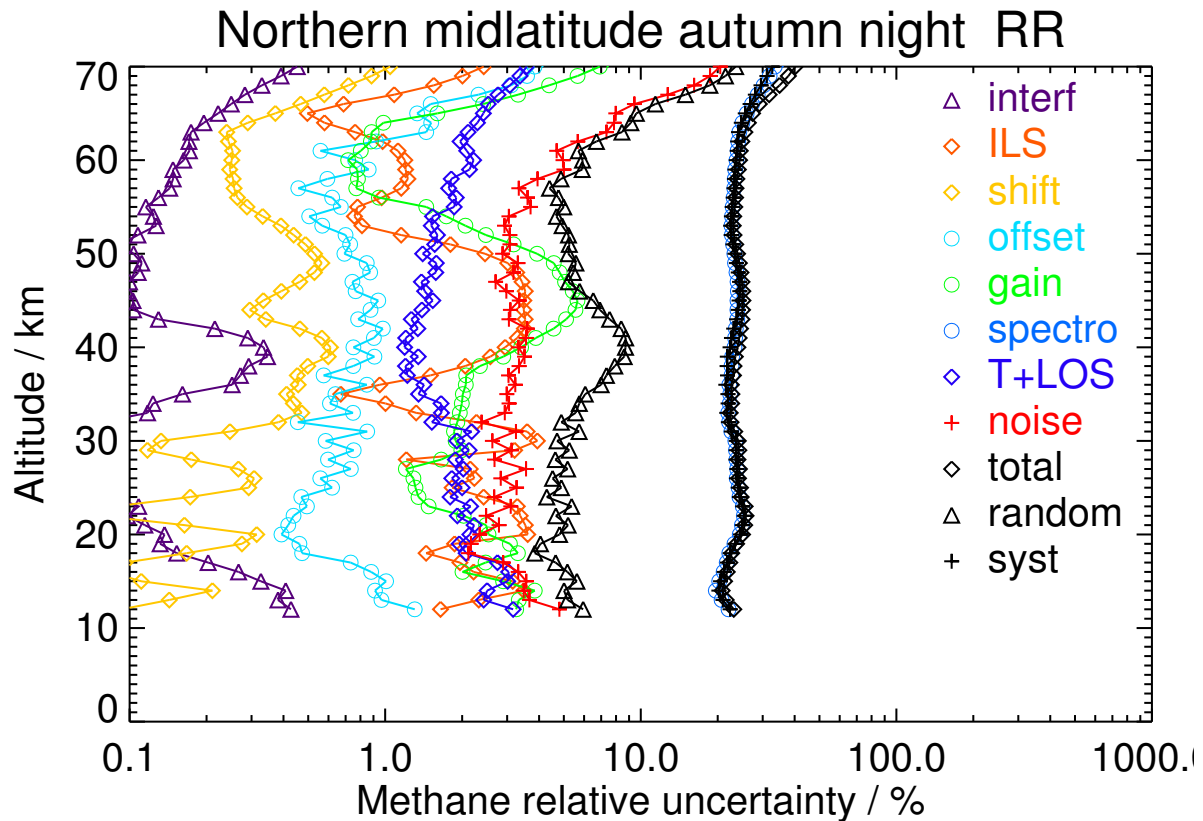**Figure S50.** V8R\_CH4\_261 Northern midlatitude autumn night

**Table S51.** Methane error budget for Tropics day. All uncertainties are  $1\sigma$ .

| altitude<br>(km) | mean target<br>(ppbv) | interf<br>(ppbv) | ILS<br>(ppbv) | shift<br>(ppbv) | offset<br>(ppbv) | gain<br>(ppbv) | spectro<br>(ppbv) | T+LOS<br>(ppbv) | noise<br>(ppbv) | random<br>(ppbv) | syst<br>(ppbv) | total<br>(ppbv) |
|------------------|-----------------------|------------------|---------------|-----------------|------------------|----------------|-------------------|-----------------|-----------------|------------------|----------------|-----------------|
| 12               | 1895.22               | 7.11             | 17.47         | 2.29            | 10.88            | 71.88          | 406.97            | 47.09           | 52.68           | 78.88            | 412.36         | 419.84          |
| 15               | 2062.95               | 9.46             | 103.32        | 2.77            | 16.50            | 79.99          | 412.04            | 72.11           | 63.41           | 112.24           | 428.77         | 443.22          |
| 18               | 1940.08               | 8.33             | 56.40         | 2.50            | 16.18            | 61.17          | 391.58            | 64.39           | 61.13           | 98.38            | 398.49         | 410.46          |
| 21               | 1668.41               | 4.47             | 34.62         | 1.52            | 5.33             | 19.04          | 395.51            | 46.60           | 48.24           | 76.08            | 395.92         | 403.16          |
| 24               | 1582.60               | 1.18             | 7.71          | 1.74            | 5.31             | 32.71          | 392.35            | 27.20           | 38.74           | 68.62            | 390.68         | 396.66          |
| 27               | 1503.16               | 1.40             | 10.71         | 2.49            | 5.95             | 21.36          | 349.78            | 26.80           | 38.95           | 55.35            | 349.48         | 353.83          |
| 30               | 1474.73               | 0.71             | 48.09         | 3.11            | 6.38             | 32.20          | 341.94            | 25.54           | 31.06           | 52.99            | 345.16         | 349.20          |
| 33               | 1367.62               | 0.78             | 12.11         | 2.46            | 6.94             | 32.09          | 286.44            | 19.76           | 29.21           | 49.61            | 286.47         | 290.73          |
| 36               | 1127.12               | 1.07             | 9.63          | 3.43            | 4.85             | 21.44          | 239.41            | 14.15           | 23.61           | 38.51            | 239.13         | 242.21          |
| 39               | 804.57                | 1.56             | 13.50         | 3.66            | 4.56             | 16.73          | 168.93            | 9.08            | 19.30           | 40.34            | 166.93         | 171.73          |
| 42               | 618.38                | 1.06             | 16.98         | 3.64            | 4.78             | 28.48          | 139.89            | 7.40            | 15.44           | 39.95            | 139.30         | 144.91          |
| 45               | 453.24                | 0.42             | 14.78         | 2.16            | 3.57             | 26.62          | 110.20            | 6.31            | 12.03           | 30.72            | 111.04         | 115.22          |
| 48               | 350.18                | 0.34             | 8.29          | 1.12            | 2.29             | 14.50          | 81.19             | 4.67            | 9.97            | 25.32            | 79.74          | 83.66           |
| 52               | 243.72                | 0.32             | 2.93          | 0.65            | 1.36             | 5.41           | 55.12             | 3.63            | 8.06            | 17.17            | 53.50          | 56.19           |
| 56               | 196.01                | 0.28             | 1.72          | 0.36            | 1.06             | 1.79           | 44.87             | 3.10            | 6.86            | 11.40            | 44.13          | 45.58           |
| 60               | 167.94                | 0.28             | 1.64          | 0.28            | 1.47             | 1.58           | 39.59             | 2.81            | 8.59            | 10.53            | 39.32          | 40.70           |
| 64               | 166.80                | 0.30             | 0.59          | 0.30            | 1.94             | 1.46           | 37.87             | 2.74            | 11.98           | 13.73            | 37.46          | 39.90           |
| 68               | 122.29                | 0.70             | 2.99          | 1.64            | 3.52             | 10.98          | 43.39             | 3.36            | 19.80           | 23.33            | 43.44          | 49.30           |

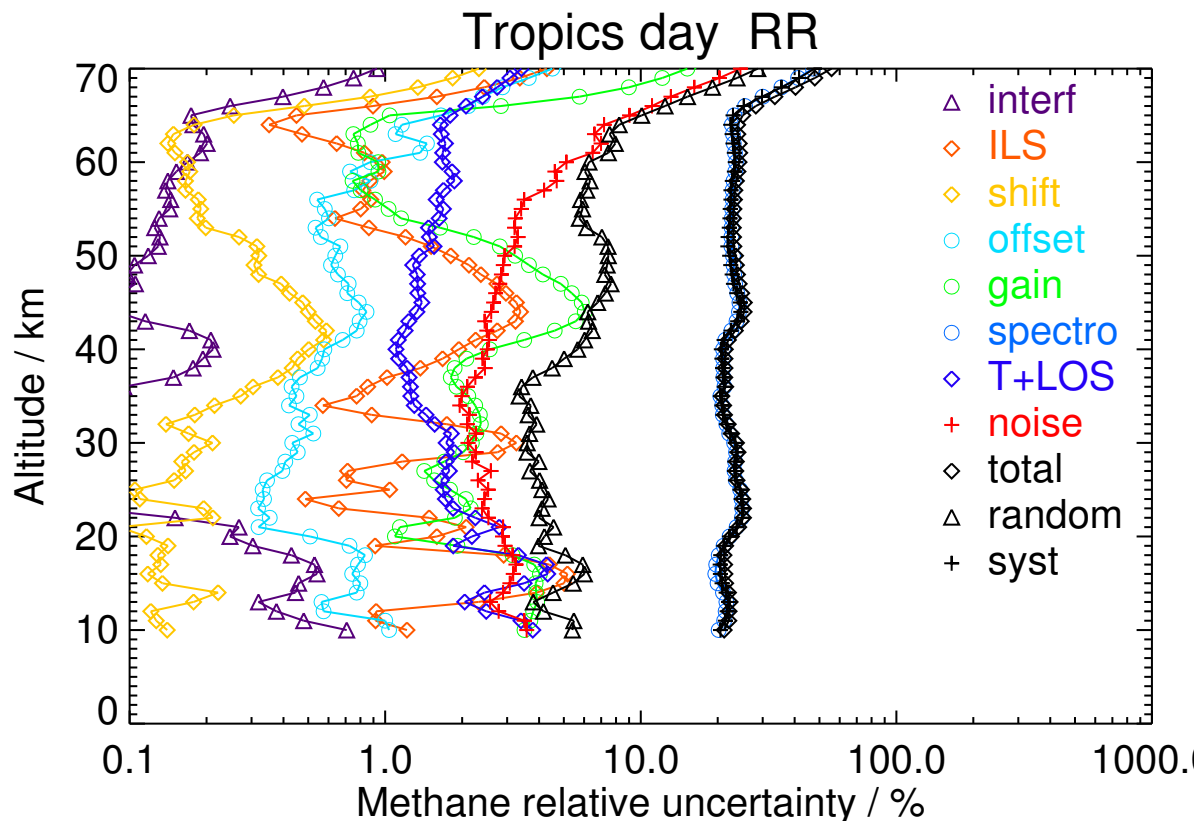

**Figure S51.** V8R\_CH4\_261 Tropics day

**Table S52.** Methane error budget for Tropics night. All uncertainties are  $1\sigma$ .

| altitude<br>(km) | mean target<br>(ppbv) | interf<br>(ppbv) | ILS<br>(ppbv) | shift<br>(ppbv) | offset<br>(ppbv) | gain<br>(ppbv) | spectro<br>(ppbv) | T+LOS<br>(ppbv) | noise<br>(ppbv) | random<br>(ppbv) | syst<br>(ppbv) | total<br>(ppbv) |
|------------------|-----------------------|------------------|---------------|-----------------|------------------|----------------|-------------------|-----------------|-----------------|------------------|----------------|-----------------|
| 12               | 1898.05               | 8.00             | 16.11         | 2.08            | 12.48            | 71.82          | 406.88            | 51.94           | 57.92           | 85.39            | 412.25         | 421.00          |
| 15               | 2080.55               | 9.37             | 88.50         | 2.98            | 15.95            | 75.72          | 408.44            | 81.73           | 64.15           | 116.10           | 421.96         | 437.64          |
| 18               | 1922.82               | 8.56             | 54.92         | 2.48            | 15.77            | 54.58          | 397.15            | 68.36           | 62.66           | 102.54           | 402.66         | 415.51          |
| 21               | 1679.24               | 4.68             | 39.96         | 2.11            | 5.57             | 17.47          | 409.37            | 51.29           | 49.80           | 81.32            | 409.93         | 417.92          |
| 24               | 1604.56               | 1.11             | 8.88          | 1.08            | 4.30             | 36.35          | 382.44            | 29.06           | 38.83           | 64.80            | 381.88         | 387.34          |
| 27               | 1487.33               | 1.34             | 10.57         | 2.40            | 6.02             | 23.24          | 354.90            | 27.90           | 37.52           | 59.72            | 353.93         | 358.93          |
| 30               | 1486.02               | 0.69             | 51.62         | 2.38            | 6.43             | 30.20          | 342.93            | 28.24           | 32.16           | 53.11            | 346.75         | 350.79          |
| 33               | 1388.88               | 0.70             | 17.63         | 3.14            | 6.49             | 32.09          | 296.26            | 21.09           | 28.96           | 46.70            | 297.09         | 300.74          |
| 36               | 1109.31               | 1.08             | 16.18         | 4.16            | 5.01             | 20.75          | 234.17            | 14.91           | 24.19           | 40.02            | 234.05         | 237.44          |
| 39               | 808.31                | 1.54             | 15.81         | 3.74            | 4.81             | 15.58          | 166.48            | 9.92            | 20.23           | 36.35            | 165.63         | 169.57          |
| 42               | 592.12                | 0.85             | 17.06         | 2.88            | 4.52             | 28.07          | 134.96            | 7.46            | 15.29           | 34.59            | 135.71         | 140.05          |
| 45               | 422.35                | 0.38             | 12.38         | 1.72            | 3.24             | 23.46          | 101.20            | 6.03            | 12.11           | 26.25            | 102.23         | 105.55          |
| 48               | 313.20                | 0.29             | 7.45          | 1.36            | 2.34             | 14.22          | 72.85             | 4.64            | 9.91            | 20.89            | 72.50          | 75.45           |
| 52               | 224.30                | 0.27             | 1.60          | 0.59            | 1.30             | 4.24           | 50.41             | 3.48            | 7.93            | 13.08            | 49.67          | 51.37           |
| 56               | 181.35                | 0.25             | 1.57          | 0.40            | 0.99             | 1.63           | 41.44             | 2.94            | 6.63            | 9.47             | 41.07          | 42.15           |
| 60               | 163.41                | 0.27             | 1.66          | 0.29            | 1.26             | 1.48           | 38.45             | 2.87            | 8.18            | 10.45            | 38.09          | 39.50           |
| 64               | 154.10                | 0.33             | 0.79          | 0.34            | 1.81             | 1.81           | 37.00             | 2.99            | 11.49           | 13.26            | 36.63          | 38.96           |
| 68               | 120.94                | 0.80             | 2.60          | 1.88            | 3.62             | 12.19          | 42.77             | 3.98            | 19.98           | 23.71            | 43.07          | 49.16           |

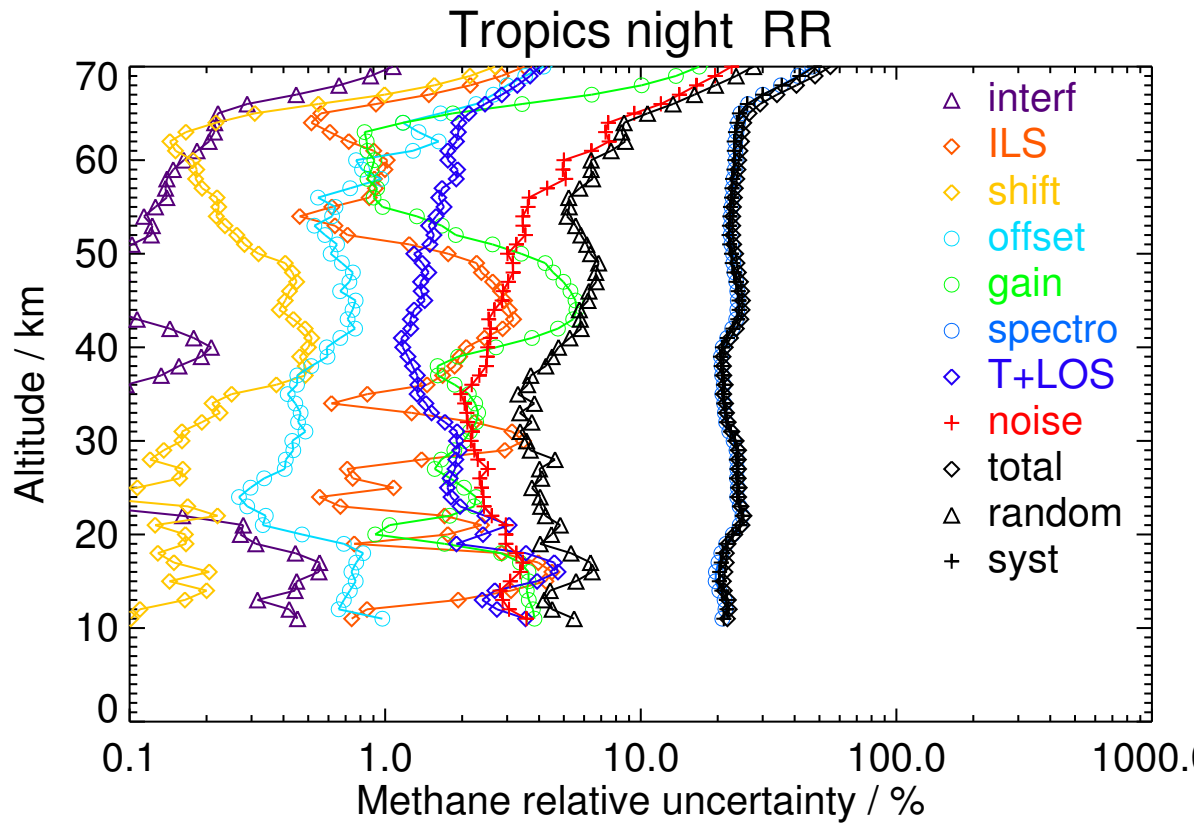**Figure S52.** V8R\_CH4\_261 Tropics night

**Table S53.** Methane error budget for Southern midlatitude winter day. All uncertainties are  $1\sigma$ .

| altitude (km) | mean target (ppbv) | interf (ppbv) | ILS (ppbv) | shift (ppbv) | offset (ppbv) | gain (ppbv) | spectro (ppbv) | T+LOS (ppbv) | noise (ppbv) | random (ppbv) | syst (ppbv) | total (ppbv) |
|---------------|--------------------|---------------|------------|--------------|---------------|-------------|----------------|--------------|--------------|---------------|-------------|--------------|
| 9             | 1898.98            | 21.83         | 12.35      | 3.60         | 28.28         | 81.31       | 370.63         | 64.08        | 111.95       | 232.83        | 328.41      | 402.57       |
| 12            | 1811.64            | 6.01          | 36.75      | 1.53         | 7.18          | 59.91       | 404.15         | 37.34        | 47.50        | 71.20         | 408.60      | 414.75       |
| 15            | 1699.72            | 5.05          | 23.11      | 2.83         | 12.13         | 42.05       | 360.23         | 44.61        | 48.20        | 79.84         | 360.81      | 369.54       |
| 18            | 1590.60            | 3.38          | 30.31      | 3.32         | 7.61          | 86.56       | 383.08         | 35.87        | 39.65        | 78.16         | 389.86      | 397.62       |
| 21            | 1371.13            | 1.43          | 22.49      | 1.70         | 6.01          | 69.32       | 352.68         | 27.68        | 39.05        | 65.57         | 357.39      | 363.36       |
| 24            | 1213.39            | 1.04          | 12.02      | 1.86         | 7.54          | 39.07       | 295.39         | 24.19        | 43.10        | 60.37         | 296.29      | 302.38       |
| 27            | 1061.30            | 0.87          | 8.96       | 0.75         | 7.83          | 20.65       | 260.17         | 23.80        | 43.25        | 74.38         | 255.27      | 265.88       |
| 30            | 951.93             | 0.90          | 34.90      | 3.01         | 9.01          | 14.99       | 241.68         | 24.46        | 42.19        | 96.38         | 230.29      | 249.64       |
| 33            | 810.18             | 1.29          | 9.73       | 3.16         | 7.82          | 12.98       | 203.07         | 18.31        | 38.75        | 85.06         | 190.19      | 208.35       |
| 36            | 689.45             | 1.79          | 19.19      | 2.74         | 8.16          | 13.59       | 164.27         | 13.44        | 36.00        | 67.13         | 156.80      | 170.56       |
| 39            | 452.25             | 1.24          | 18.62      | 2.23         | 6.60          | 16.59       | 116.79         | 9.74         | 28.56        | 52.75         | 111.54      | 123.38       |
| 42            | 247.77             | 0.52          | 7.81       | 1.12         | 4.04          | 10.61       | 62.75          | 5.62         | 19.35        | 31.60         | 59.46       | 67.34        |
| 45            | 162.80             | 0.17          | 2.86       | 0.49         | 2.47          | 7.19        | 39.34          | 3.45         | 12.39        | 18.42         | 37.95       | 42.18        |
| 48            | 152.20             | 0.15          | 2.38       | 0.38         | 1.74          | 5.55        | 35.59          | 2.40         | 7.60         | 13.61         | 34.42       | 37.02        |
| 52            | 154.39             | 0.12          | 1.30       | 0.28         | 1.44          | 4.73        | 36.56          | 2.31         | 6.27         | 11.82         | 35.61       | 37.52        |
| 56            | 149.53             | 0.10          | 1.41       | 0.35         | 1.37          | 3.81        | 37.27          | 2.47         | 7.43         | 12.67         | 36.17       | 38.33        |
| 60            | 134.44             | 0.12          | 1.50       | 0.27         | 1.79          | 2.88        | 34.62          | 2.41         | 10.43        | 14.34         | 33.48       | 36.42        |
| 64            | 105.67             | 0.19          | 0.80       | 0.20         | 2.81          | 1.92        | 28.07          | 1.79         | 13.61        | 16.16         | 26.97       | 31.44        |
| 68            | 83.99              | 0.22          | 1.87       | 0.69         | 4.29          | 1.68        | 26.07          | 1.75         | 21.23        | 24.18         | 23.96       | 34.04        |

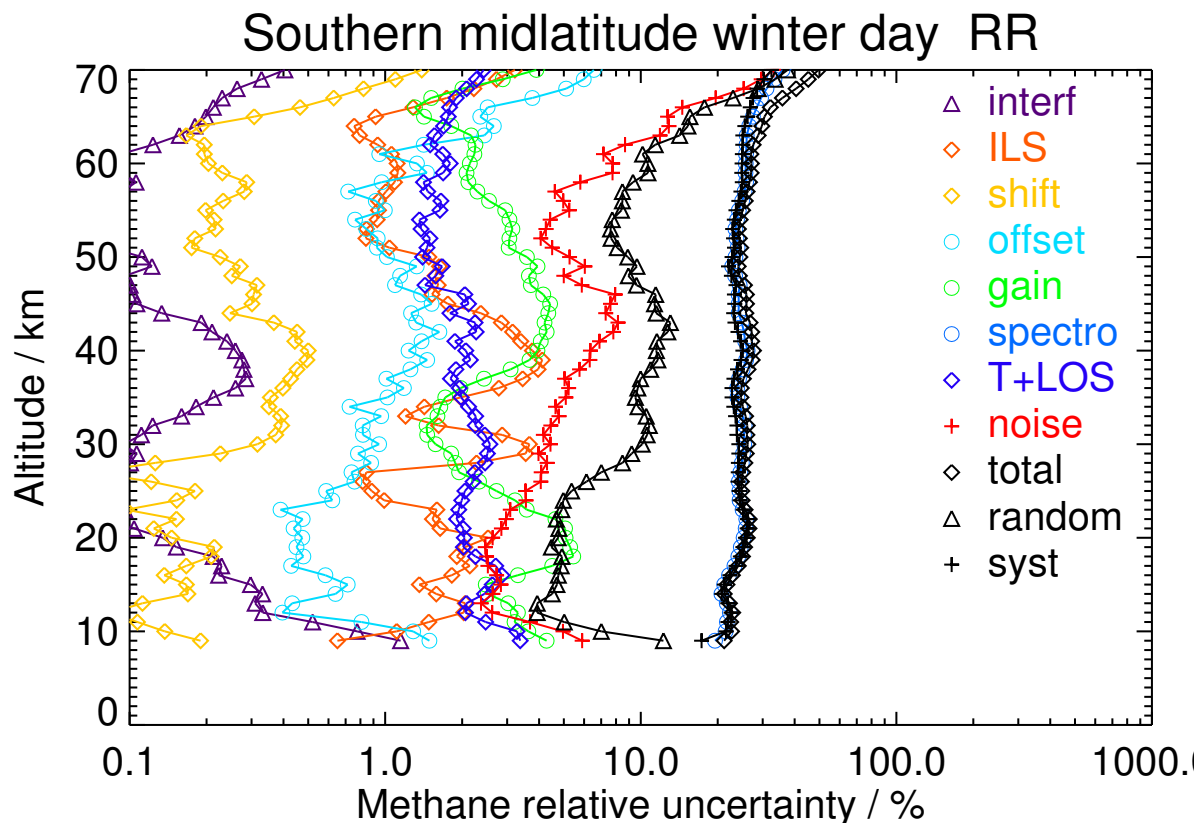

**Figure S53.** V8R\_CH4\_261 Southern midlatitude winter day



**Table S54.** Methane error budget for Southern midlatitude winter night. All uncertainties are  $1\sigma$ .

| altitude<br>(km) | mean target<br>(ppbv) | interf<br>(ppbv) | ILS<br>(ppbv) | shift<br>(ppbv) | offset<br>(ppbv) | gain<br>(ppbv) | spectro<br>(ppbv) | T+LOS<br>(ppbv) | noise<br>(ppbv) | random<br>(ppbv) | syst<br>(ppbv) | total<br>(ppbv) |
|------------------|-----------------------|------------------|---------------|-----------------|------------------|----------------|-------------------|-----------------|-----------------|------------------|----------------|-----------------|
| 9                | 1710.21               | 18.92            | 6.42          | 1.77            | 27.51            | 57.44          | 312.98            | 63.28           | 101.44          | 164.32           | 299.51         | 341.63          |
| 12               | 1838.01               | 6.64             | 31.89         | 1.37            | 6.07             | 56.69          | 386.83            | 35.21           | 41.88           | 71.64            | 389.64         | 396.17          |
| 15               | 1693.73               | 5.62             | 26.39         | 2.36            | 11.71            | 50.80          | 348.11            | 41.47           | 46.88           | 84.25            | 348.50         | 358.54          |
| 18               | 1611.63               | 3.15             | 51.82         | 2.08            | 10.53            | 121.44         | 316.15            | 40.42           | 38.78           | 86.05            | 336.51         | 347.34          |
| 21               | 1346.50               | 1.36             | 16.48         | 2.01            | 7.57             | 79.55          | 287.78            | 28.80           | 39.13           | 70.43            | 294.75         | 303.05          |
| 24               | 1187.35               | 0.89             | 12.60         | 1.73            | 6.09             | 38.22          | 265.71            | 22.10           | 37.07           | 58.07            | 265.99         | 272.26          |
| 27               | 1065.99               | 0.80             | 10.65         | 1.27            | 9.14             | 19.23          | 252.26            | 24.91           | 47.00           | 68.35            | 249.72         | 258.91          |
| 30               | 881.67                | 0.76             | 29.59         | 1.94            | 6.23             | 14.07          | 229.53            | 22.58           | 34.67           | 80.03            | 221.60         | 235.61          |
| 33               | 758.81                | 0.88             | 9.84          | 2.85            | 7.21             | 9.87           | 184.84            | 15.67           | 35.87           | 76.60            | 173.45         | 189.61          |
| 36               | 631.95                | 1.78             | 13.44         | 2.47            | 7.54             | 16.21          | 142.46            | 10.70           | 32.25           | 56.94            | 136.80         | 148.18          |
| 39               | 455.90                | 1.32             | 13.84         | 2.21            | 6.02             | 15.21          | 95.95             | 8.04            | 25.93           | 38.29            | 94.56          | 102.02          |
| 42               | 266.64                | 0.39             | 6.85          | 0.62            | 3.86             | 14.20          | 62.50             | 4.84            | 17.21           | 26.62            | 61.49          | 67.00           |
| 45               | 161.44                | 0.18             | 3.53          | 0.45            | 2.27             | 6.89           | 39.59             | 2.99            | 11.84           | 18.06            | 38.15          | 42.21           |
| 48               | 142.92                | 0.14             | 2.12          | 0.37            | 1.64             | 4.68           | 34.69             | 2.28            | 8.16            | 13.32            | 33.57          | 36.12           |
| 52               | 141.77                | 0.12             | 1.33          | 0.32            | 1.57             | 4.37           | 34.95             | 2.46            | 7.59            | 13.21            | 33.68          | 36.18           |
| 56               | 140.70                | 0.13             | 1.19          | 0.36            | 1.73             | 3.27           | 34.74             | 2.62            | 9.19            | 13.69            | 33.56          | 36.25           |
| 60               | 120.42                | 0.14             | 1.00          | 0.29            | 2.20             | 2.12           | 29.74             | 2.28            | 11.50           | 13.72            | 29.06          | 32.13           |
| 64               | 99.07                 | 0.19             | 0.60          | 0.25            | 2.93             | 1.50           | 24.58             | 1.82            | 14.44           | 16.17            | 23.79          | 28.77           |
| 68               | 76.34                 | 0.23             | 1.47          | 0.54            | 4.15             | 2.27           | 21.06             | 1.89            | 21.22           | 23.03            | 19.80          | 30.37           |

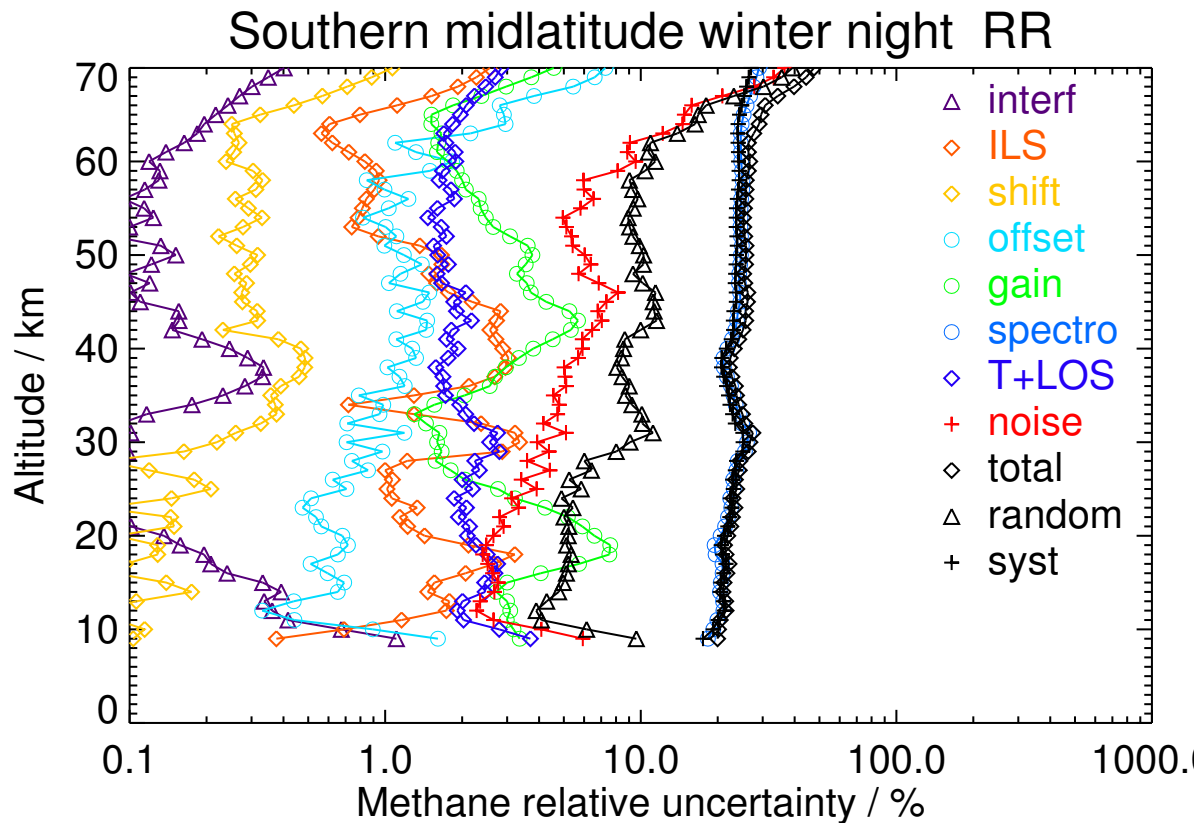**Figure S54.** V8R\_CH4\_261 Southern midlatitude winter night



**Table S55.** Methane error budget for Southern midlatitude spring day. All uncertainties are  $1\sigma$ .

| altitude (km) | mean target (ppbv) | interf (ppbv) | ILS (ppbv) | shift (ppbv) | offset (ppbv) | gain (ppbv) | spectro (ppbv) | T+LOS (ppbv) | noise (ppbv) | random (ppbv) | syst (ppbv) | total (ppbv) |
|---------------|--------------------|---------------|------------|--------------|---------------|-------------|----------------|--------------|--------------|---------------|-------------|--------------|
| 9             | 1894.55            | 23.04         | 23.26      | 2.44         | 24.50         | 63.49       | 366.89         | 61.62        | 96.35        | 143.31        | 364.50      | 391.66       |
| 12            | 1782.96            | 9.72          | 43.66      | 2.10         | 6.82          | 57.09       | 402.37         | 39.49        | 44.71        | 93.05         | 402.63      | 413.24       |
| 15            | 1652.68            | 8.52          | 38.80      | 3.49         | 12.78         | 44.01       | 364.79         | 45.51        | 50.02        | 103.60        | 361.39      | 375.95       |
| 18            | 1467.41            | 3.31          | 47.96      | 3.77         | 7.98          | 70.09       | 362.14         | 34.27        | 36.16        | 121.88        | 355.07      | 375.41       |
| 21            | 1235.31            | 1.54          | 36.89      | 2.77         | 5.21          | 50.73       | 333.52         | 27.72        | 37.44        | 111.54        | 323.94      | 342.60       |
| 24            | 1294.55            | 0.99          | 20.70      | 1.51         | 6.26          | 29.73       | 331.18         | 20.79        | 30.24        | 75.31         | 326.66      | 335.23       |
| 27            | 1268.64            | 1.01          | 17.67      | 3.66         | 6.76          | 18.63       | 298.75         | 21.52        | 33.31        | 68.48         | 294.71      | 302.56       |
| 30            | 1253.79            | 0.98          | 44.23      | 4.03         | 5.74          | 23.99       | 288.82         | 21.47        | 24.96        | 57.97         | 289.34      | 295.09       |
| 33            | 1048.12            | 1.35          | 12.86      | 3.17         | 5.94          | 24.03       | 224.47         | 16.19        | 23.51        | 51.95         | 222.02      | 228.02       |
| 36            | 666.59             | 1.85          | 18.61      | 3.26         | 5.30          | 14.99       | 144.74         | 10.32        | 19.90        | 44.00         | 141.88      | 148.55       |
| 39            | 450.35             | 1.48          | 15.17      | 2.17         | 4.56          | 15.78       | 95.76          | 6.36         | 16.98        | 29.51         | 95.58       | 100.03       |
| 42            | 359.23             | 0.80          | 12.90      | 1.39         | 3.78          | 17.25       | 81.22          | 4.64         | 14.36        | 24.01         | 82.02       | 85.47        |
| 45            | 277.66             | 0.36          | 6.40       | 0.82         | 2.82          | 14.85       | 63.25          | 4.03         | 11.95        | 16.22         | 64.55       | 66.56        |
| 48            | 271.74             | 0.34          | 5.32       | 1.06         | 2.77          | 14.42       | 62.73          | 4.26         | 9.20         | 15.09         | 63.68       | 65.44        |
| 52            | 272.15             | 0.27          | 2.42       | 0.85         | 2.19          | 9.91        | 62.07          | 4.12         | 8.25         | 13.50         | 62.17       | 63.62        |
| 56            | 241.38             | 0.26          | 1.52       | 0.72         | 1.70          | 5.30        | 56.15          | 4.29         | 8.91         | 12.21         | 56.00       | 57.31        |
| 60            | 221.30             | 0.35          | 1.23       | 0.57         | 2.02          | 2.80        | 52.98          | 4.37         | 11.61        | 14.00         | 52.71       | 54.54        |
| 64            | 191.43             | 0.36          | 0.83       | 0.50         | 3.08          | 1.67        | 45.93          | 3.63         | 15.27        | 17.70         | 45.35       | 48.68        |
| 68            | 118.59             | 0.49          | 2.96       | 1.02         | 4.13          | 6.56        | 38.50          | 2.87         | 21.45        | 24.37         | 37.78       | 44.96        |

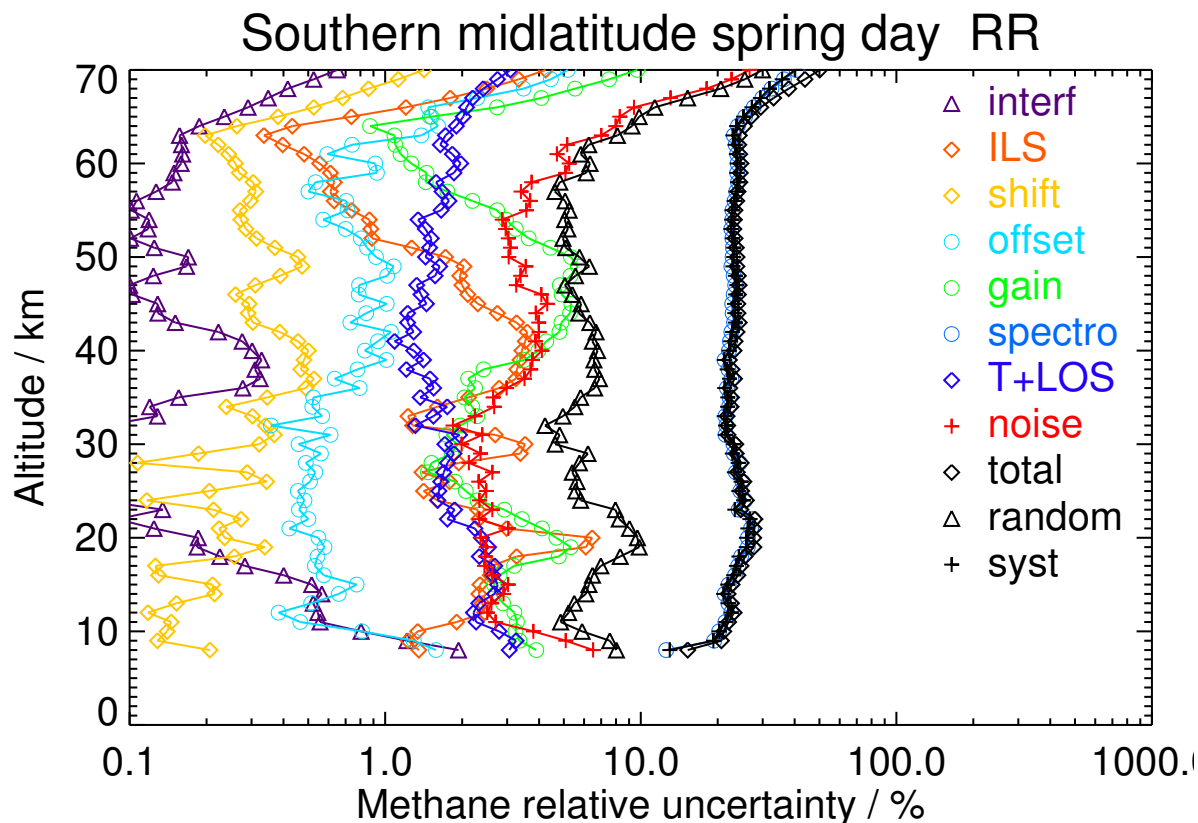

**Figure S55.** V8R\_CH4\_261 Southern midlatitude spring day

**Table S56.** Methane error budget for Southern midlatitude spring night. All uncertainties are  $1\sigma$ .

| altitude<br>(km) | mean target<br>(ppbv) | interf<br>(ppbv) | ILS<br>(ppbv) | shift<br>(ppbv) | offset<br>(ppbv) | gain<br>(ppbv) | spectro<br>(ppbv) | T+LOS<br>(ppbv) | noise<br>(ppbv) | random<br>(ppbv) | syst<br>(ppbv) | total<br>(ppbv) |
|------------------|-----------------------|------------------|---------------|-----------------|------------------|----------------|-------------------|-----------------|-----------------|------------------|----------------|-----------------|
| 9                | 1838.74               | 17.11            | 24.63         | 2.40            | 24.19            | 58.75          | 333.72            | 63.80           | 92.82           | 147.25           | 327.59         | 359.17          |
| 12               | 1851.12               | 7.71             | 70.98         | 1.92            | 7.76             | 75.55          | 387.34            | 40.50           | 46.51           | 90.49            | 395.62         | 405.84          |
| 15               | 1683.67               | 7.14             | 67.17         | 2.39            | 13.36            | 61.39          | 351.18            | 45.92           | 50.09           | 107.45           | 353.44         | 369.41          |
| 18               | 1455.49               | 3.07             | 61.89         | 2.87            | 12.13            | 122.80         | 344.12            | 38.07           | 37.77           | 137.09           | 348.68         | 374.66          |
| 21               | 1123.30               | 1.55             | 37.58         | 1.90            | 6.07             | 64.46          | 285.17            | 26.33           | 37.07           | 112.49           | 276.31         | 298.33          |
| 24               | 1094.81               | 1.08             | 18.97         | 1.46            | 5.24             | 22.95          | 278.94            | 17.75           | 29.48           | 109.51           | 260.60         | 282.68          |
| 27               | 1064.51               | 1.14             | 17.09         | 2.67            | 6.62             | 15.25          | 258.36            | 18.76           | 33.28           | 104.02           | 240.77         | 262.28          |
| 30               | 1193.54               | 0.91             | 48.04         | 3.50            | 5.42             | 29.00          | 276.33            | 18.59           | 23.48           | 75.14            | 273.50         | 283.63          |
| 33               | 963.31                | 1.57             | 14.01         | 3.54            | 5.61             | 24.27          | 220.81            | 14.69           | 22.66           | 59.93            | 216.16         | 224.31          |
| 36               | 626.00                | 1.92             | 18.31         | 2.90            | 5.30             | 19.81          | 139.02            | 9.47            | 19.60           | 42.64            | 136.93         | 143.42          |
| 39               | 410.72                | 1.35             | 17.23         | 2.07            | 4.42             | 17.50          | 92.03             | 5.97            | 16.42           | 29.09            | 92.51          | 96.98           |
| 42               | 303.55                | 0.68             | 11.01         | 1.28            | 3.42             | 15.36          | 70.47             | 4.10            | 13.03           | 21.37            | 71.18          | 74.32           |
| 45               | 261.59                | 0.35             | 7.26          | 0.95            | 2.62             | 14.39          | 62.57             | 3.86            | 10.83           | 16.76            | 63.51          | 65.68           |
| 48               | 268.71                | 0.35             | 6.01          | 0.98            | 2.36             | 12.33          | 64.02             | 3.85            | 8.56            | 15.68            | 64.31          | 66.20           |
| 52               | 254.35                | 0.29             | 2.36          | 0.72            | 1.95             | 8.52           | 58.99             | 3.76            | 7.51            | 13.41            | 58.77          | 60.28           |
| 56               | 227.81                | 0.27             | 1.79          | 0.74            | 1.55             | 3.86           | 53.37             | 3.94            | 8.31            | 11.44            | 53.13          | 54.35           |
| 60               | 200.61                | 0.38             | 2.03          | 0.66            | 1.92             | 2.24           | 48.53             | 3.98            | 10.64           | 13.17            | 48.21          | 49.97           |
| 64               | 167.17                | 0.36             | 1.67          | 0.52            | 2.91             | 1.60           | 41.53             | 3.46            | 14.14           | 17.50            | 40.55          | 44.17           |
| 68               | 110.94                | 0.45             | 2.70          | 1.08            | 3.90             | 5.36           | 35.26             | 3.14            | 20.19           | 23.70            | 33.94          | 41.40           |

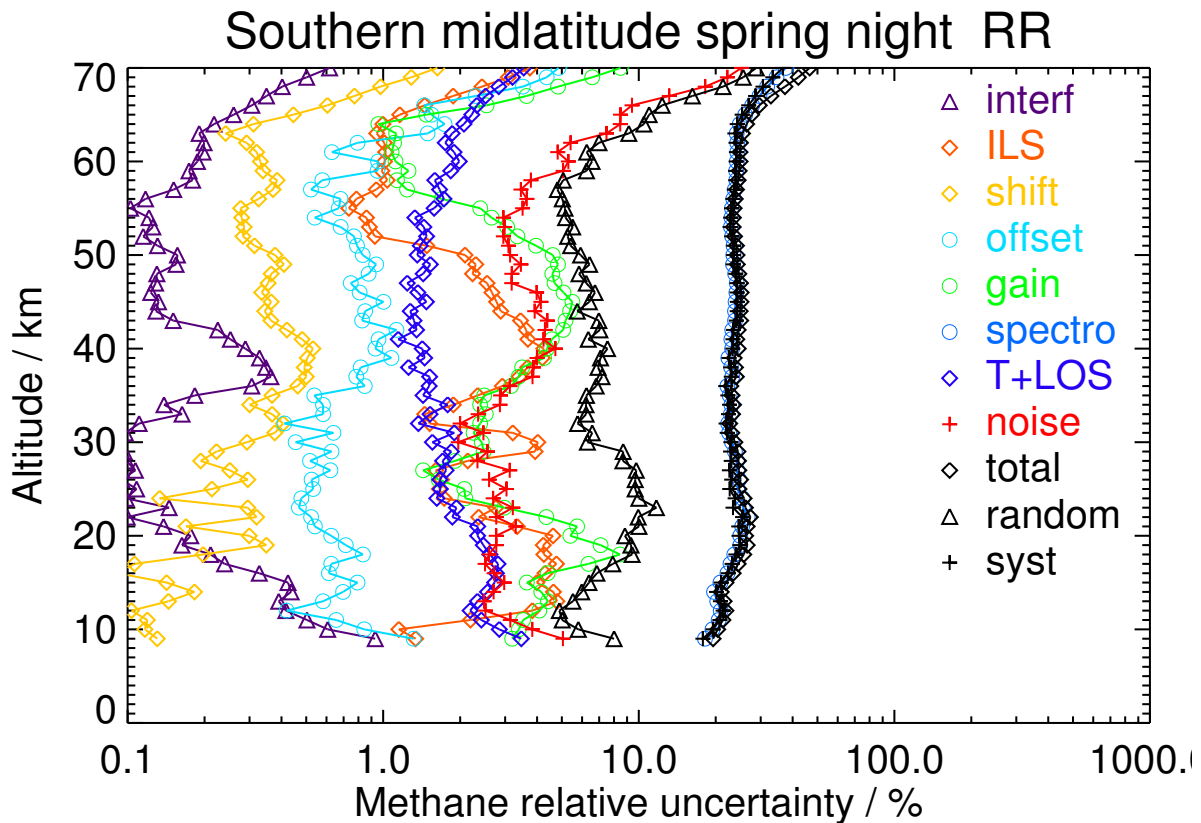**Figure S56.** V8R\_CH4\_261 Southern midlatitude spring night

**Table S57.** Methane error budget for Southern midlatitude summer day. All uncertainties are  $1\sigma$ .

| altitude (km) | mean target (ppbv) | interf (ppbv) | ILS (ppbv) | shift (ppbv) | offset (ppbv) | gain (ppbv) | spectro (ppbv) | T+LOS (ppbv) | noise (ppbv) | random (ppbv) | syst (ppbv) | total (ppbv) |
|---------------|--------------------|---------------|------------|--------------|---------------|-------------|----------------|--------------|--------------|---------------|-------------|--------------|
| 9             | 1669.50            | 24.04         | 30.74      | 2.87         | 23.22         | 54.76       | 279.49         | 55.32        | 91.41        | 164.42        | 259.93      | 307.57       |
| 12            | 1779.00            | 8.26          | 49.70      | 1.90         | 6.67          | 68.65       | 358.65         | 34.04        | 40.19        | 105.56        | 357.16      | 372.43       |
| 15            | 1772.10            | 7.86          | 92.05      | 3.11         | 12.09         | 81.63       | 352.87         | 41.29        | 46.20        | 134.03        | 354.61      | 379.09       |
| 18            | 1594.95            | 4.40          | 84.83      | 2.81         | 10.13         | 99.07       | 337.49         | 37.69        | 38.09        | 132.51        | 341.10      | 365.94       |
| 21            | 1280.92            | 1.82          | 54.79      | 2.19         | 5.04          | 16.88       | 338.01         | 30.31        | 36.28        | 83.07         | 336.01      | 346.13       |
| 24            | 1173.58            | 1.35          | 21.22      | 1.11         | 4.68          | 12.36       | 286.44         | 19.25        | 26.81        | 58.43         | 283.47      | 289.42       |
| 27            | 1063.43            | 0.91          | 12.34      | 3.03         | 7.21          | 12.59       | 250.64         | 20.92        | 33.66        | 51.37         | 249.25      | 254.49       |
| 30            | 979.40             | 1.32          | 45.19      | 1.59         | 4.13          | 19.12       | 211.07         | 14.27        | 19.63        | 41.44         | 214.13      | 218.11       |
| 33            | 869.51             | 1.23          | 7.53       | 3.18         | 5.10          | 20.10       | 177.68         | 10.98        | 19.88        | 32.56         | 177.55      | 180.51       |
| 36            | 689.63             | 2.36          | 14.74      | 2.99         | 4.63          | 13.43       | 141.79         | 8.07         | 17.80        | 25.33         | 142.40      | 144.63       |
| 39            | 529.02             | 1.76          | 13.79      | 2.67         | 3.85          | 12.97       | 109.71         | 5.97         | 15.08        | 27.90         | 109.11      | 112.62       |
| 42            | 358.61             | 0.67          | 10.91      | 1.79         | 3.21          | 15.45       | 80.57          | 4.07         | 12.03        | 22.34         | 80.78       | 83.82        |
| 45            | 280.30             | 0.46          | 6.44       | 1.44         | 2.43          | 14.72       | 66.47          | 3.22         | 9.81         | 23.42         | 65.14       | 69.22        |
| 48            | 186.57             | 0.29          | 5.37       | 0.99         | 1.49          | 8.77        | 49.86          | 1.89         | 7.42         | 20.54         | 47.24       | 51.51        |
| 52            | 138.76             | 0.12          | 1.79       | 0.35         | 0.96          | 3.61        | 33.06          | 1.46         | 4.75         | 9.93          | 32.19       | 33.69        |
| 56            | 114.45             | 0.07          | 0.56       | 0.28         | 1.03          | 2.03        | 26.96          | 1.46         | 4.90         | 6.18          | 26.84       | 27.54        |
| 60            | 124.46             | 0.22          | 1.13       | 0.40         | 1.54          | 1.39        | 29.98          | 1.89         | 7.40         | 9.15          | 29.65       | 31.03        |
| 64            | 142.80             | 0.34          | 1.93       | 0.35         | 2.62          | 1.70        | 35.37          | 2.25         | 11.72        | 12.97         | 35.20       | 37.51        |
| 68            | 169.41             | 0.67          | 2.77       | 1.34         | 3.95          | 5.74        | 48.63          | 2.88         | 19.47        | 21.67         | 48.38       | 53.02        |

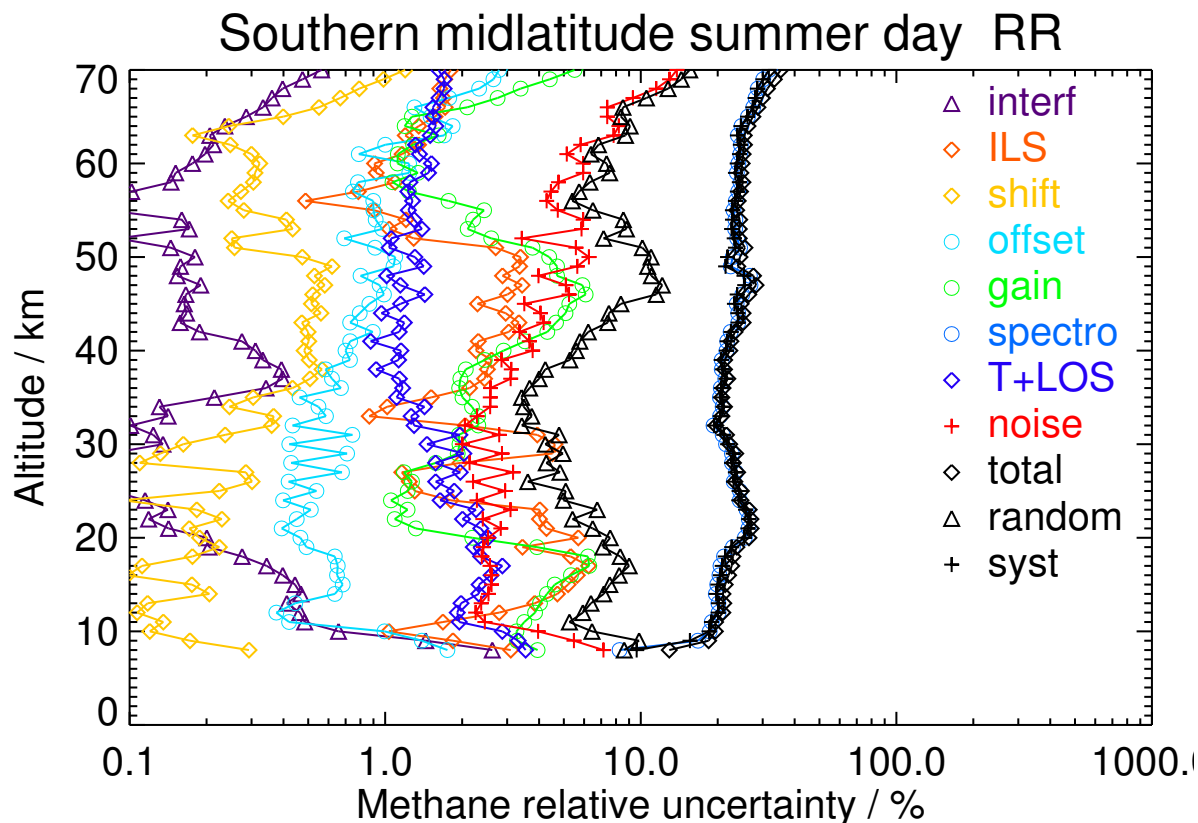

**Figure S57.** V8R\_CH4\_261 Southern midlatitude summer day

**Table S58.** Methane error budget for Southern midlatitude summer night. All uncertainties are  $1\sigma$ .

| altitude (km) | mean target (ppbv) | interf (ppbv) | ILS (ppbv) | shift (ppbv) | offset (ppbv) | gain (ppbv) | spectro (ppbv) | T+LOS (ppbv) | noise (ppbv) | random (ppbv) | syst (ppbv) | total (ppbv) |
|---------------|--------------------|---------------|------------|--------------|---------------|-------------|----------------|--------------|--------------|---------------|-------------|--------------|
| 9             | 1707.92            | 23.71         | 36.14      | 2.31         | 22.99         | 41.38       | 284.82         | 59.32        | 91.14        | 182.51        | 252.50      | 311.55       |
| 12            | 1781.18            | 7.44          | 35.29      | 1.81         | 6.99          | 60.46       | 384.22         | 33.07        | 40.85        | 98.96         | 381.58      | 394.20       |
| 15            | 1715.11            | 7.77          | 67.47      | 3.34         | 12.25         | 69.39       | 374.87         | 40.22        | 45.82        | 97.00         | 380.03      | 392.21       |
| 18            | 1589.69            | 3.55          | 73.54      | 4.73         | 13.05         | 120.50      | 375.92         | 37.18        | 37.10        | 118.95        | 387.37      | 405.23       |
| 21            | 1219.59            | 1.77          | 32.09      | 3.09         | 4.41          | 34.72       | 310.89         | 25.78        | 35.03        | 84.82         | 305.97      | 317.51       |
| 24            | 1168.22            | 1.50          | 14.10      | 1.45         | 4.08          | 11.41       | 258.90         | 18.25        | 27.83        | 55.64         | 255.72      | 261.70       |
| 27            | 1044.23            | 0.85          | 11.04      | 3.26         | 7.23          | 11.42       | 251.05         | 20.24        | 33.60        | 50.78         | 249.60      | 254.72       |
| 30            | 974.68             | 1.15          | 47.83      | 2.16         | 4.42          | 20.69       | 205.45         | 14.38        | 20.63        | 42.39         | 209.26      | 213.51       |
| 33            | 861.76             | 1.26          | 9.18       | 3.36         | 4.85          | 21.61       | 181.90         | 10.47        | 19.84        | 30.29         | 182.38      | 184.88       |
| 36            | 704.74             | 2.19          | 16.53      | 2.89         | 4.53          | 14.73       | 149.24         | 7.99         | 18.24        | 29.71         | 149.36      | 152.29       |
| 39            | 518.90             | 1.58          | 16.16      | 2.48         | 3.84          | 14.51       | 113.08         | 5.39         | 14.80        | 27.48         | 113.03      | 116.32       |
| 42            | 377.19             | 0.57          | 13.55      | 1.94         | 3.53          | 19.69       | 92.20          | 3.98         | 12.02        | 26.30         | 92.51       | 96.17        |
| 45            | 247.61             | 0.49          | 6.04       | 1.52         | 2.12          | 12.92       | 65.05          | 2.70         | 9.48         | 24.36         | 62.82       | 67.38        |
| 48            | 175.17             | 0.26          | 3.62       | 0.80         | 1.35          | 6.37        | 46.10          | 1.58         | 7.48         | 18.25         | 43.67       | 47.33        |
| 52            | 119.79             | 0.12          | 1.31       | 0.30         | 0.91          | 2.57        | 28.76          | 1.35         | 4.82         | 8.79          | 28.00       | 29.35        |
| 56            | 110.31             | 0.12          | 0.92       | 0.31         | 0.99          | 1.44        | 26.26          | 1.40         | 4.80         | 8.12          | 25.54       | 26.80        |
| 60            | 110.52             | 0.23          | 1.36       | 0.40         | 1.44          | 1.12        | 26.07          | 1.71         | 6.86         | 8.26          | 25.82       | 27.11        |
| 64            | 128.01             | 0.35          | 1.67       | 0.34         | 2.37          | 1.39        | 30.73          | 2.10         | 10.60        | 11.65         | 30.59       | 32.73        |
| 68            | 148.43             | 0.68          | 1.85       | 1.28         | 3.59          | 6.41        | 40.30          | 3.06         | 17.48        | 20.12         | 39.92       | 44.70        |

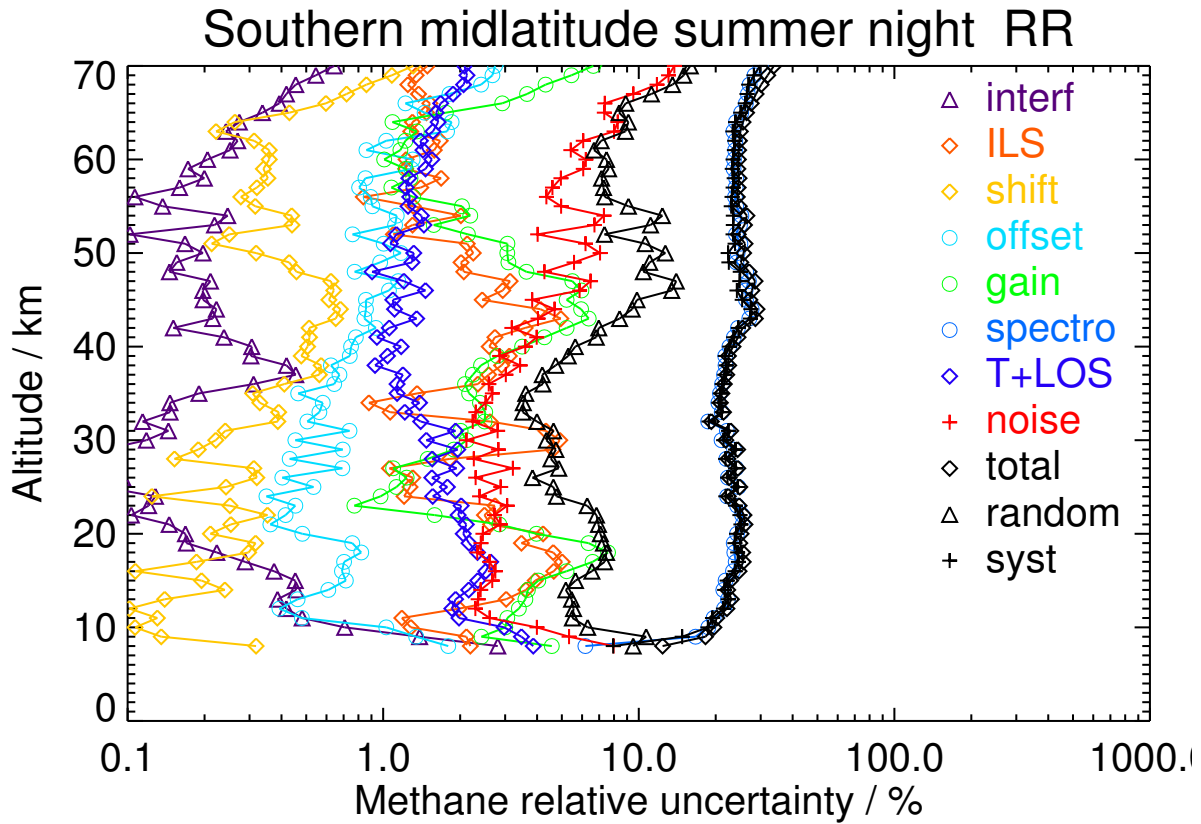

**Figure S58.** V8R\_CH4\_261 Southern midlatitude summer night

**Table S59.** Methane error budget for Southern midlatitude autumn day. All uncertainties are  $1\sigma$ .

| altitude (km) | mean target (ppbv) | interf (ppbv) | ILS (ppbv) | shift (ppbv) | offset (ppbv) | gain (ppbv) | spectro (ppbv) | T+LOS (ppbv) | noise (ppbv) | random (ppbv) | syst (ppbv) | total (ppbv) |
|---------------|--------------------|---------------|------------|--------------|---------------|-------------|----------------|--------------|--------------|---------------|-------------|--------------|
| 9             | 1751.93            | 16.59         | 12.65      | 2.46         | 25.77         | 61.65       | 348.78         | 66.02        | 90.45        | 128.32        | 350.18      | 372.96       |
| 12            | 1862.82            | 6.16          | 43.05      | 1.53         | 5.88          | 68.90       | 389.96         | 36.76        | 39.92        | 68.26         | 396.28      | 402.11       |
| 15            | 1775.10            | 5.78          | 51.37      | 2.42         | 13.08         | 69.17       | 370.54         | 45.58        | 47.53        | 88.91         | 375.99      | 386.36       |
| 18            | 1631.88            | 3.39          | 57.36      | 3.24         | 11.37         | 130.06      | 359.71         | 39.06        | 37.29        | 101.20        | 377.39      | 390.72       |
| 21            | 1319.51            | 1.36          | 32.44      | 2.74         | 7.14          | 80.39       | 319.11         | 30.40        | 36.83        | 86.72         | 322.75      | 334.20       |
| 24            | 1163.05            | 1.05          | 12.58      | 1.45         | 6.91          | 38.31       | 279.98         | 22.52        | 36.15        | 57.25         | 280.36      | 286.14       |
| 27            | 1014.39            | 0.99          | 8.68       | 1.48         | 6.58          | 17.06       | 236.45         | 20.14        | 33.37        | 51.14         | 235.00      | 240.50       |
| 30            | 874.21             | 0.63          | 27.84      | 2.43         | 6.96          | 15.62       | 211.64         | 19.81        | 28.59        | 48.19         | 211.54      | 216.96       |
| 33            | 763.02             | 1.09          | 8.55       | 2.52         | 6.67          | 17.11       | 174.60         | 13.91        | 26.22        | 50.39         | 171.01      | 178.28       |
| 36            | 548.79             | 1.50          | 15.62      | 1.94         | 5.87          | 18.06       | 134.99         | 9.02         | 22.77        | 58.02         | 126.76      | 139.40       |
| 39            | 462.15             | 1.44          | 16.78      | 2.01         | 5.27          | 19.95       | 113.79         | 7.24         | 20.80        | 58.27         | 103.69      | 118.94       |
| 42            | 370.98             | 0.81          | 14.79      | 1.06         | 4.62          | 21.55       | 96.25          | 5.79         | 17.96        | 51.95         | 87.34       | 101.62       |
| 45            | 345.66             | 0.37          | 9.45       | 1.00         | 3.95          | 22.04       | 89.33          | 5.92         | 15.50        | 46.87         | 81.54       | 94.05        |
| 48            | 317.20             | 0.41          | 6.48       | 1.08         | 3.72          | 19.12       | 81.49          | 5.88         | 12.58        | 39.02         | 75.72       | 85.19        |
| 52            | 305.85             | 0.35          | 2.13       | 0.70         | 2.97          | 12.32       | 70.82          | 6.11         | 11.23        | 22.52         | 69.55       | 73.10        |
| 56            | 294.77             | 0.33          | 1.74       | 0.67         | 2.26          | 6.99        | 68.35          | 6.39         | 12.18        | 18.00         | 67.79       | 70.14        |
| 60            | 230.02             | 0.31          | 1.02       | 0.45         | 2.25          | 3.43        | 55.58          | 5.24         | 13.40        | 19.14         | 54.29       | 57.57        |
| 64            | 137.30             | 0.26          | 1.22       | 0.31         | 3.14          | 1.38        | 35.63          | 3.16         | 15.77        | 19.41         | 34.13       | 39.27        |
| 68            | 60.35              | 0.23          | 1.82       | 0.46         | 4.22          | 2.94        | 22.37          | 2.04         | 21.16        | 23.62         | 20.60       | 31.34        |

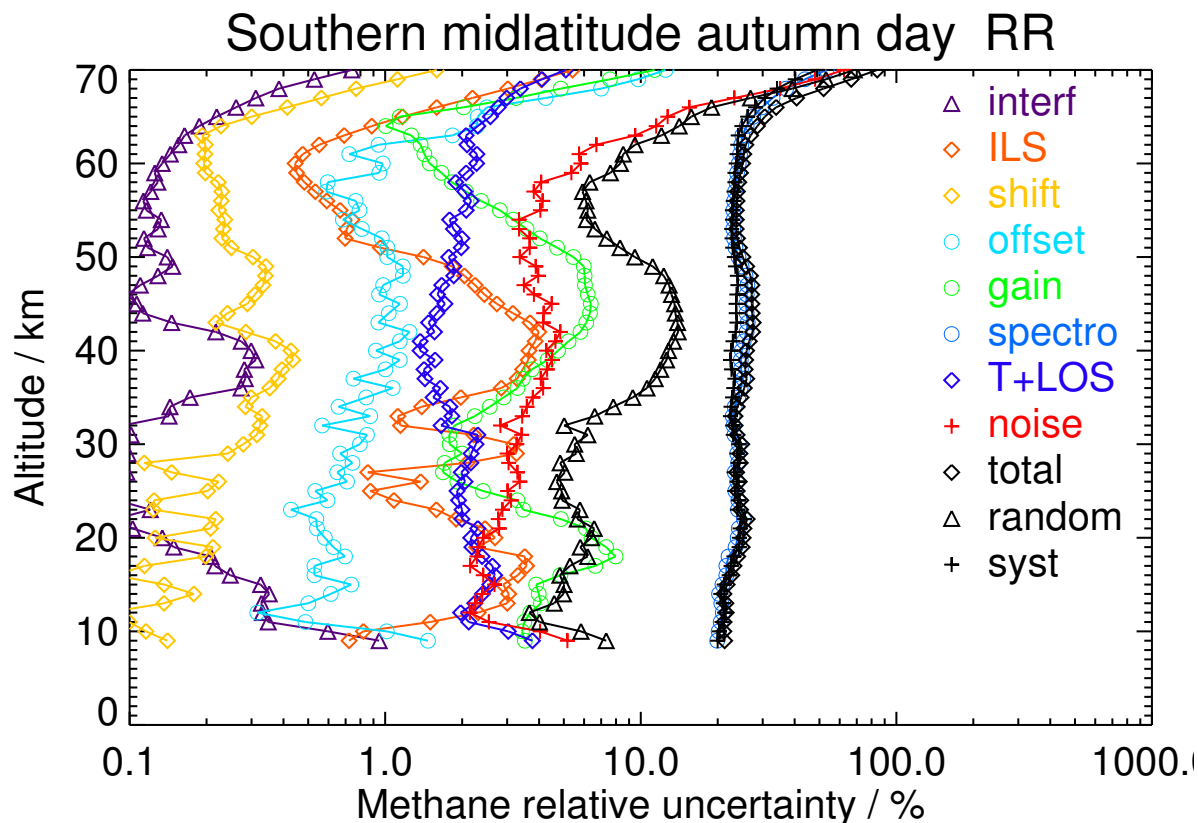

**Figure S59.** V8R\_CH4\_261 Southern midlatitude autumn day

**Table S60.** Methane error budget for Southern midlatitude autumn night. All uncertainties are  $1\sigma$ .

| altitude (km) | mean target (ppbv) | interf (ppbv) | ILS (ppbv) | shift (ppbv) | offset (ppbv) | gain (ppbv) | spectro (ppbv) | T+LOS (ppbv) | noise (ppbv) | random (ppbv) | syst (ppbv) | total (ppbv) |
|---------------|--------------------|---------------|------------|--------------|---------------|-------------|----------------|--------------|--------------|---------------|-------------|--------------|
| 9             | 1853.90            | 18.78         | 17.32      | 2.26         | 26.33         | 51.91       | 353.58         | 68.14        | 95.86        | 129.11        | 355.29      | 378.02       |
| 12            | 1860.35            | 6.43          | 50.19      | 1.36         | 5.93          | 75.72       | 409.73         | 36.53        | 40.37        | 77.31         | 416.17      | 423.29       |
| 15            | 1774.57            | 6.16          | 71.58      | 2.26         | 13.14         | 90.12       | 366.65         | 45.47        | 48.46        | 90.05         | 379.73      | 390.26       |
| 18            | 1622.12            | 3.16          | 71.65      | 3.49         | 11.84         | 135.66      | 344.37         | 40.63        | 36.76        | 91.67         | 369.98      | 381.17       |
| 21            | 1291.78            | 1.52          | 37.86      | 2.40         | 7.01          | 70.43       | 305.73         | 30.00        | 37.06        | 87.84         | 307.37      | 319.68       |
| 24            | 1125.80            | 1.16          | 16.49      | 1.76         | 5.26          | 20.84       | 260.72         | 20.01        | 30.25        | 52.26         | 259.42      | 264.63       |
| 27            | 999.83             | 0.84          | 15.70      | 2.51         | 8.51          | 12.66       | 243.23         | 21.78        | 39.05        | 58.84         | 241.21      | 248.28       |
| 30            | 882.03             | 0.68          | 34.52      | 2.33         | 4.67          | 16.70       | 200.66         | 16.39        | 23.27        | 47.93         | 200.69      | 206.34       |
| 33            | 751.09             | 1.02          | 6.21       | 2.52         | 6.00          | 15.72       | 166.86         | 11.77        | 24.11        | 45.95         | 163.64      | 169.97       |
| 36            | 572.37             | 1.38          | 10.33      | 1.87         | 6.01          | 14.83       | 127.86         | 8.08         | 22.49        | 51.56         | 120.95      | 131.48       |
| 39            | 491.76             | 1.65          | 14.65      | 2.26         | 5.36          | 16.21       | 111.39         | 6.63         | 20.46        | 55.82         | 101.33      | 115.69       |
| 42            | 420.69             | 1.02          | 13.78      | 1.52         | 4.63          | 20.18       | 101.45         | 5.53         | 17.46        | 50.49         | 93.28       | 106.06       |
| 45            | 346.08             | 0.39          | 8.20       | 1.03         | 3.69          | 19.73       | 89.88          | 5.43         | 14.58        | 47.38         | 80.91       | 93.76        |
| 48            | 324.94             | 0.45          | 5.81       | 1.29         | 3.19          | 15.91       | 81.40          | 5.16         | 11.40        | 36.14         | 75.99       | 84.15        |
| 52            | 294.19             | 0.36          | 1.94       | 0.78         | 2.55          | 9.30        | 67.54          | 5.52         | 11.06        | 21.74         | 65.87       | 69.37        |
| 56            | 283.11             | 0.47          | 2.10       | 0.73         | 2.34          | 4.74        | 63.75          | 6.07         | 12.41        | 17.79         | 63.02       | 65.49        |
| 60            | 225.61             | 0.40          | 1.32       | 0.48         | 2.61          | 2.42        | 52.97          | 5.22         | 14.03        | 17.64         | 52.28       | 55.18        |
| 64            | 136.10             | 0.29          | 0.97       | 0.36         | 3.25          | 1.45        | 34.93          | 3.39         | 16.34        | 19.84         | 33.45       | 38.89        |
| 68            | 67.60              | 0.28          | 1.94       | 0.48         | 4.01          | 3.84        | 23.48          | 2.44         | 20.92        | 24.10         | 21.18       | 32.09        |

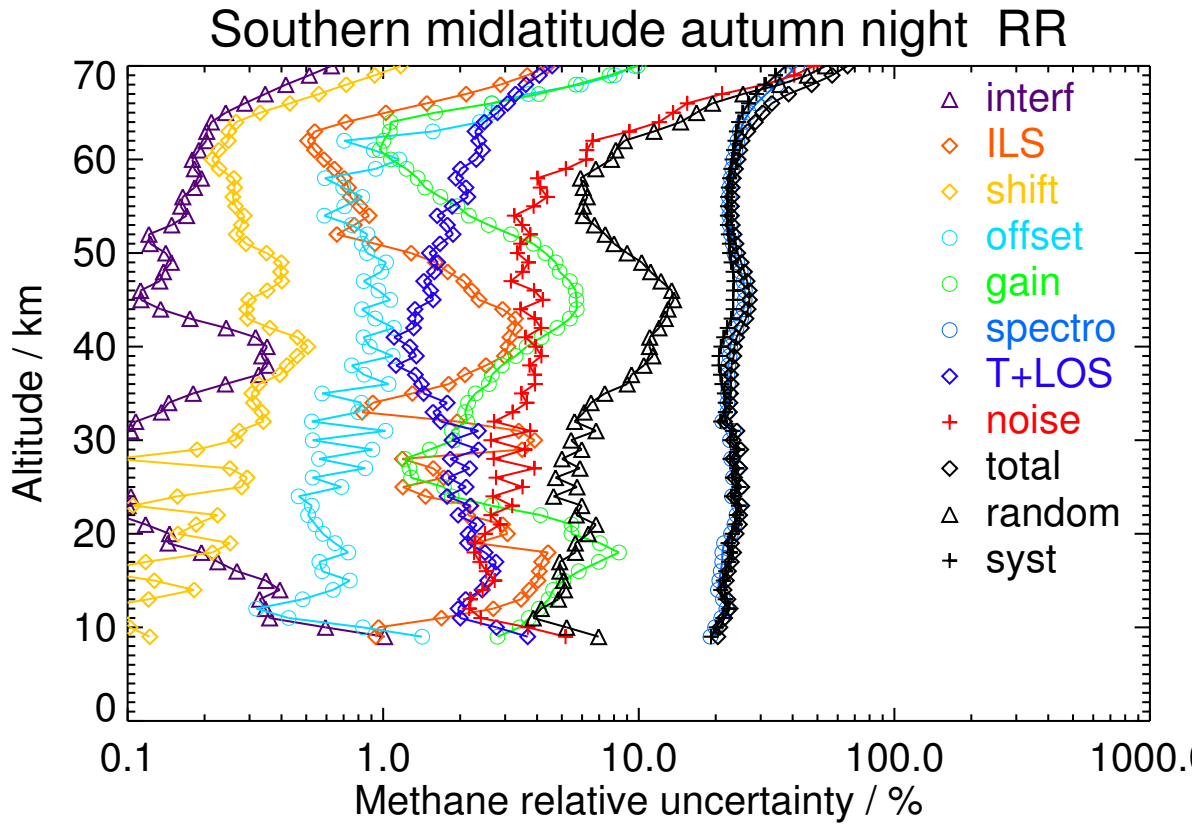

**Figure S60.** V8R\_CH4\_261 Southern midlatitude autumn night

**Table S61.** Methane error budget for Southern polar winter day. All uncertainties are  $1\sigma$ .

| altitude (km) | mean target (ppbv) | interf (ppbv) | ILS (ppbv) | shift (ppbv) | offset (ppbv) | gain (ppbv) | spectro (ppbv) | T+LOS (ppbv) | noise (ppbv) | random (ppbv) | syst (ppbv) | total (ppbv) |
|---------------|--------------------|---------------|------------|--------------|---------------|-------------|----------------|--------------|--------------|---------------|-------------|--------------|
| 9             | 1810.04            | 35.13         | 2.29       | 0.86         | 26.97         | 53.61       | 264.28         | 46.57        | 110.40       | 128.79        | 269.18      | 298.40       |
| 12            | 1789.07            | 12.00         | 34.82      | 2.31         | 11.43         | 58.32       | 406.36         | 44.92        | 58.32        | 83.04         | 410.54      | 418.85       |
| 15            | 1495.94            | 13.90         | 9.64       | 2.94         | 14.07         | 41.43       | 321.38         | 51.55        | 58.54        | 85.43         | 322.92      | 334.03       |
| 18            | 1273.25            | 3.97          | 22.83      | 3.47         | 8.78          | 56.12       | 334.97         | 33.19        | 40.92        | 66.62         | 338.11      | 344.61       |
| 21            | 966.45             | 1.70          | 19.20      | 1.18         | 6.18          | 29.92       | 261.86         | 22.93        | 39.09        | 63.33         | 260.62      | 268.20       |
| 24            | 659.44             | 1.09          | 12.09      | 2.23         | 8.56          | 10.69       | 178.43         | 22.20        | 50.06        | 80.11         | 169.58      | 187.55       |
| 27            | 487.20             | 1.14          | 8.16       | 0.80         | 6.08          | 5.33        | 115.12         | 13.94        | 36.13        | 62.02         | 105.08      | 122.01       |
| 30            | 531.93             | 1.41          | 17.82      | 2.21         | 8.80          | 6.54        | 127.35         | 15.34        | 39.27        | 50.22         | 126.17      | 135.80       |
| 33            | 328.93             | 2.04          | 6.31       | 2.49         | 6.31          | 4.67        | 85.64          | 10.70        | 30.95        | 50.35         | 77.35       | 92.29        |
| 36            | 216.24             | 1.44          | 4.88       | 1.53         | 4.56          | 4.96        | 55.93          | 6.25         | 24.12        | 40.71         | 46.53       | 61.83        |
| 39            | 198.65             | 0.79          | 4.00       | 0.78         | 3.41          | 5.68        | 48.23          | 4.67         | 17.93        | 25.10         | 45.83       | 52.25        |
| 42            | 189.61             | 0.32          | 3.18       | 1.11         | 2.56          | 6.54        | 44.83          | 4.12         | 12.81        | 17.61         | 44.06       | 47.45        |
| 45            | 205.12             | 0.21          | 4.05       | 0.75         | 2.08          | 7.27        | 47.40          | 3.50         | 9.66         | 14.77         | 46.99       | 49.26        |
| 48            | 192.32             | 0.19          | 3.67       | 0.53         | 1.67          | 6.45        | 43.65          | 2.84         | 7.32         | 12.56         | 43.21       | 45.00        |
| 52            | 166.01             | 0.14          | 2.23       | 0.48         | 1.35          | 4.49        | 38.54          | 2.31         | 5.70         | 9.38          | 38.24       | 39.37        |
| 56            | 144.92             | 0.10          | 2.04       | 0.31         | 1.10          | 3.25        | 35.66          | 2.06         | 6.21         | 8.83          | 35.39       | 36.48        |
| 60            | 129.49             | 0.08          | 1.15       | 0.33         | 1.46          | 2.74        | 33.00          | 2.16         | 9.29         | 11.89         | 32.40       | 34.51        |
| 64            | 101.88             | 0.22          | 0.73       | 0.48         | 2.87          | 1.82        | 28.15          | 1.86         | 14.26        | 16.60         | 27.12       | 31.80        |
| 68            | 90.71              | 0.41          | 1.03       | 1.53         | 4.71          | 3.97        | 29.07          | 2.10         | 23.62        | 25.80         | 27.99       | 38.07        |

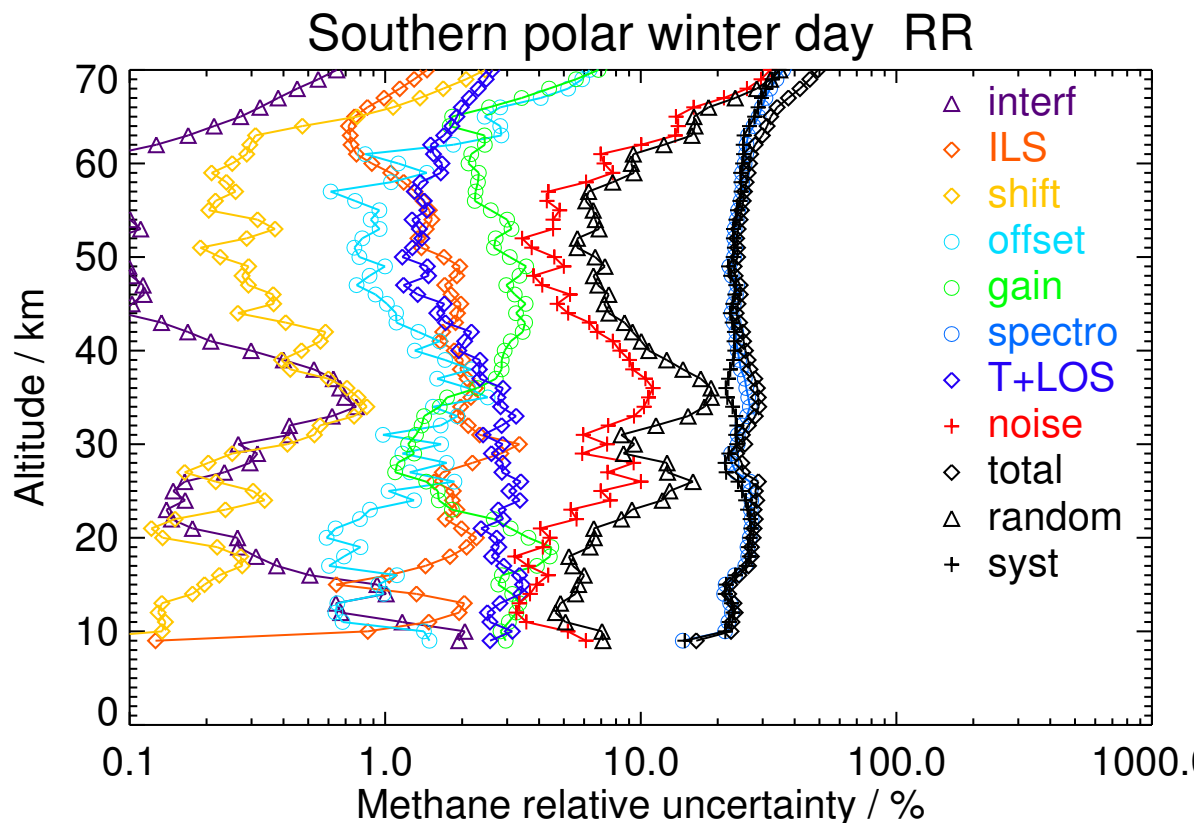

**Figure S61.** V8R\_CH4\_261 Southern polar winter day



**Table S62.** Methane error budget for Southern polar winter night. All uncertainties are  $1\sigma$ .

| altitude (km) | mean target (ppbv) | interf (ppbv) | ILS (ppbv) | shift (ppbv) | offset (ppbv) | gain (ppbv) | spectro (ppbv) | T+LOS (ppbv) | noise (ppbv) | random (ppbv) | syst (ppbv) | total (ppbv) |
|---------------|--------------------|---------------|------------|--------------|---------------|-------------|----------------|--------------|--------------|---------------|-------------|--------------|
| 9             | 1727.83            | 31.21         | 10.30      | 1.38         | 23.73         | 59.96       | 216.33         | 43.30        | 96.93        | 128.68        | 216.22      | 251.61       |
| 12            | 1818.69            | 9.21          | 39.10      | 1.43         | 8.34          | 61.45       | 348.70         | 41.97        | 47.96        | 72.44         | 354.78      | 362.10       |
| 15            | 1517.09            | 14.93         | 18.95      | 2.26         | 13.52         | 44.51       | 267.29         | 51.28        | 58.65        | 97.25         | 266.09      | 283.30       |
| 18            | 1245.13            | 3.82          | 15.19      | 2.28         | 8.82          | 47.44       | 262.87         | 35.45        | 42.49        | 73.51         | 263.33      | 273.39       |
| 21            | 987.54             | 2.53          | 20.06      | 1.07         | 5.79          | 27.19       | 234.13         | 25.53        | 41.79        | 60.50         | 233.96      | 241.65       |
| 24            | 736.69             | 1.04          | 12.53      | 2.28         | 9.04          | 16.04       | 190.60         | 23.12        | 49.96        | 72.92         | 185.86      | 199.65       |
| 27            | 466.63             | 1.18          | 8.88       | 1.10         | 6.24          | 6.68        | 118.98         | 14.65        | 36.01        | 62.93         | 108.96      | 125.83       |
| 30            | 458.50             | 1.01          | 13.21      | 1.86         | 8.43          | 10.75       | 117.66         | 13.58        | 36.45        | 54.84         | 112.77      | 125.39       |
| 33            | 343.46             | 1.94          | 6.35       | 2.13         | 6.46          | 9.23        | 89.91          | 10.45        | 28.12        | 45.62         | 84.13       | 95.70        |
| 36            | 215.92             | 1.14          | 4.71       | 1.34         | 4.91          | 6.74        | 59.09          | 6.10         | 21.95        | 38.10         | 51.52       | 64.07        |
| 39            | 187.21             | 0.67          | 3.43       | 0.85         | 3.68          | 8.04        | 48.94          | 4.64         | 16.72        | 26.55         | 45.64       | 52.80        |
| 42            | 183.05             | 0.35          | 4.62       | 1.18         | 2.74          | 7.91        | 46.18          | 4.02         | 12.41        | 20.97         | 44.23       | 48.95        |
| 45            | 184.62             | 0.24          | 4.27       | 0.70         | 2.05          | 7.44        | 44.55          | 3.21         | 9.20         | 16.56         | 43.40       | 46.46        |
| 48            | 178.92             | 0.18          | 2.54       | 0.30         | 1.53          | 5.63        | 42.01          | 2.37         | 6.79         | 12.61         | 41.21       | 43.10        |
| 52            | 154.78             | 0.20          | 2.38       | 0.38         | 1.30          | 4.85        | 37.98          | 2.14         | 5.56         | 9.74          | 37.60       | 38.84        |
| 56            | 139.54             | 0.12          | 1.55       | 0.37         | 1.21          | 3.18        | 34.29          | 2.14         | 6.75         | 9.00          | 34.04       | 35.21        |
| 60            | 116.88             | 0.12          | 0.91       | 0.30         | 1.67          | 2.34        | 29.40          | 2.14         | 10.16        | 12.17         | 28.87       | 31.33        |
| 64            | 103.25             | 0.21          | 0.98       | 0.31         | 2.89          | 1.41        | 26.00          | 1.90         | 14.00        | 16.00         | 25.12       | 29.78        |
| 68            | 79.67              | 0.43          | 1.75       | 1.34         | 4.57          | 5.01        | 23.98          | 2.27         | 22.32        | 25.14         | 22.29       | 33.60        |

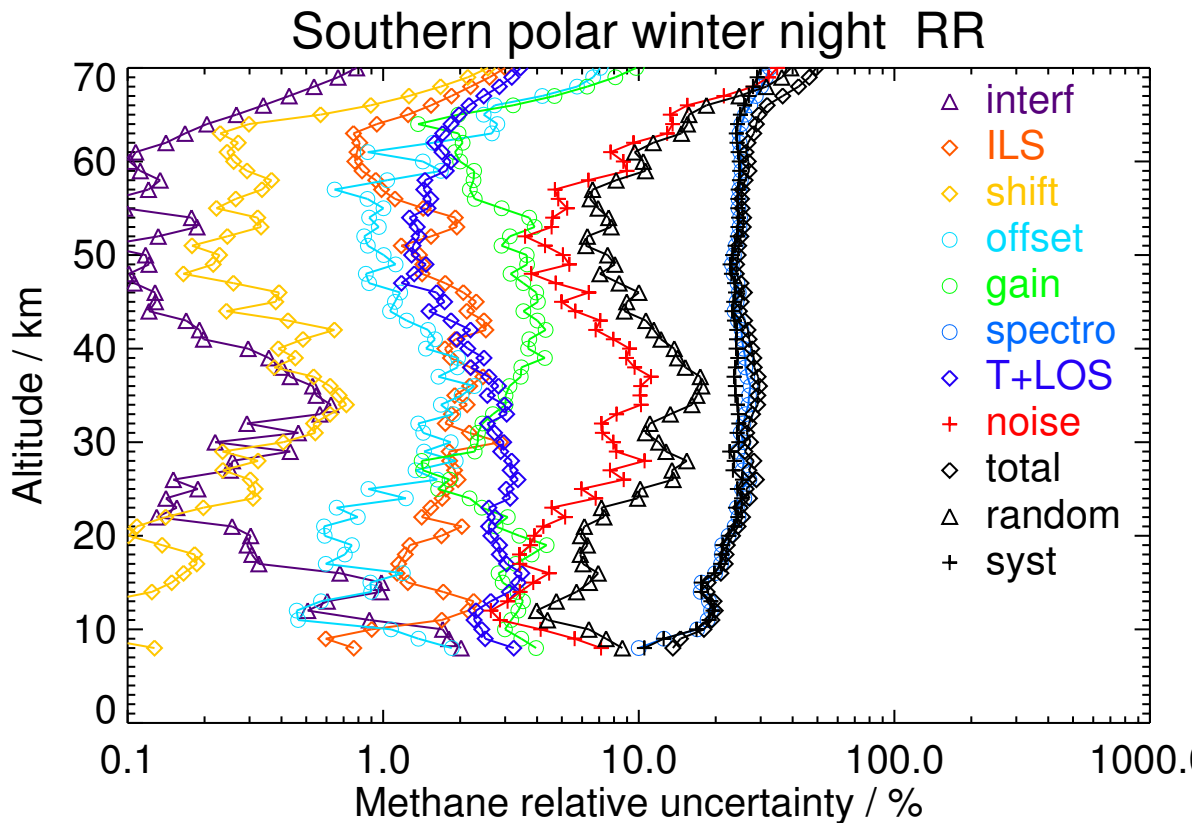

**Figure S62.** V8R\_CH4\_261 Southern polar winter night



**Table S63.** Methane error budget for Southern polar spring day. All uncertainties are  $1\sigma$ .

| altitude (km) | mean target (ppbv) | interf (ppbv) | ILS (ppbv) | shift (ppbv) | offset (ppbv) | gain (ppbv) | spectro (ppbv) | T+LOS (ppbv) | noise (ppbv) | random (ppbv) | syst (ppbv) | total (ppbv) |
|---------------|--------------------|---------------|------------|--------------|---------------|-------------|----------------|--------------|--------------|---------------|-------------|--------------|
| 9             | 1768.05            | 28.38         | 18.83      | 4.02         | 23.86         | 58.40       | 247.95         | 45.43        | 103.62       | 128.93        | 250.62      | 281.84       |
| 12            | 1732.25            | 11.73         | 53.92      | 4.18         | 8.59          | 52.59       | 418.74         | 50.10        | 51.40        | 114.44        | 416.29      | 431.74       |
| 15            | 1352.56            | 7.24          | 32.68      | 2.59         | 11.83         | 23.58       | 264.71         | 47.98        | 53.79        | 97.20         | 260.08      | 277.65       |
| 18            | 1233.34            | 2.08          | 25.72      | 3.40         | 7.53          | 37.63       | 291.08         | 33.42        | 32.85        | 87.23         | 285.42      | 298.45       |
| 21            | 997.34             | 1.28          | 26.33      | 3.12         | 4.46          | 32.56       | 285.86         | 18.83        | 26.09        | 121.65        | 264.08      | 290.75       |
| 24            | 951.93             | 0.79          | 19.58      | 1.67         | 6.66          | 18.21       | 290.83         | 18.42        | 32.38        | 153.42        | 251.39      | 294.51       |
| 27            | 842.46             | 1.32          | 8.69       | 3.05         | 3.24          | 14.84       | 220.73         | 11.81        | 18.72        | 126.22        | 183.30      | 222.55       |
| 30            | 898.34             | 1.09          | 34.07      | 3.74         | 6.13          | 26.44       | 231.37         | 17.06        | 24.51        | 118.76        | 205.50      | 237.35       |
| 33            | 749.52             | 1.41          | 13.16      | 2.84         | 4.46          | 18.07       | 171.78         | 14.00        | 21.72        | 78.64         | 156.60      | 175.23       |
| 36            | 547.51             | 1.26          | 9.29       | 3.43         | 3.72          | 11.35       | 120.16         | 8.51         | 20.24        | 46.48         | 114.03      | 123.14       |
| 39            | 383.96             | 1.15          | 14.18      | 2.18         | 3.04          | 13.18       | 82.13          | 5.17         | 16.76        | 29.27         | 81.15       | 86.27        |
| 42            | 305.94             | 0.74          | 10.84      | 1.55         | 2.45          | 11.95       | 65.75          | 3.93         | 12.94        | 21.07         | 65.81       | 69.10        |
| 45            | 281.76             | 0.35          | 7.85       | 0.98         | 2.28          | 13.33       | 63.23          | 3.67         | 10.59        | 16.47         | 64.02       | 66.11        |
| 48            | 286.65             | 0.46          | 8.19       | 1.19         | 2.43          | 15.14       | 64.40          | 4.28         | 8.99         | 21.36         | 63.98       | 67.45        |
| 52            | 267.49             | 0.34          | 4.89       | 0.81         | 1.92          | 8.52        | 59.31          | 3.78         | 7.17         | 14.27         | 58.99       | 60.70        |
| 56            | 251.53             | 0.28          | 2.99       | 0.88         | 1.30          | 4.49        | 57.99          | 3.87         | 7.26         | 10.93         | 57.82       | 58.84        |
| 60            | 221.90             | 0.34          | 1.92       | 0.75         | 1.42          | 2.89        | 53.55          | 4.12         | 9.28         | 12.39         | 53.22       | 54.64        |
| 64            | 188.73             | 0.38          | 1.35       | 0.64         | 2.52          | 1.73        | 47.06          | 3.44         | 12.51        | 15.37         | 46.46       | 48.93        |
| 68            | 151.84             | 0.47          | 2.29       | 1.25         | 4.27          | 5.48        | 43.80          | 3.42         | 21.27        | 24.52         | 42.86       | 49.38        |

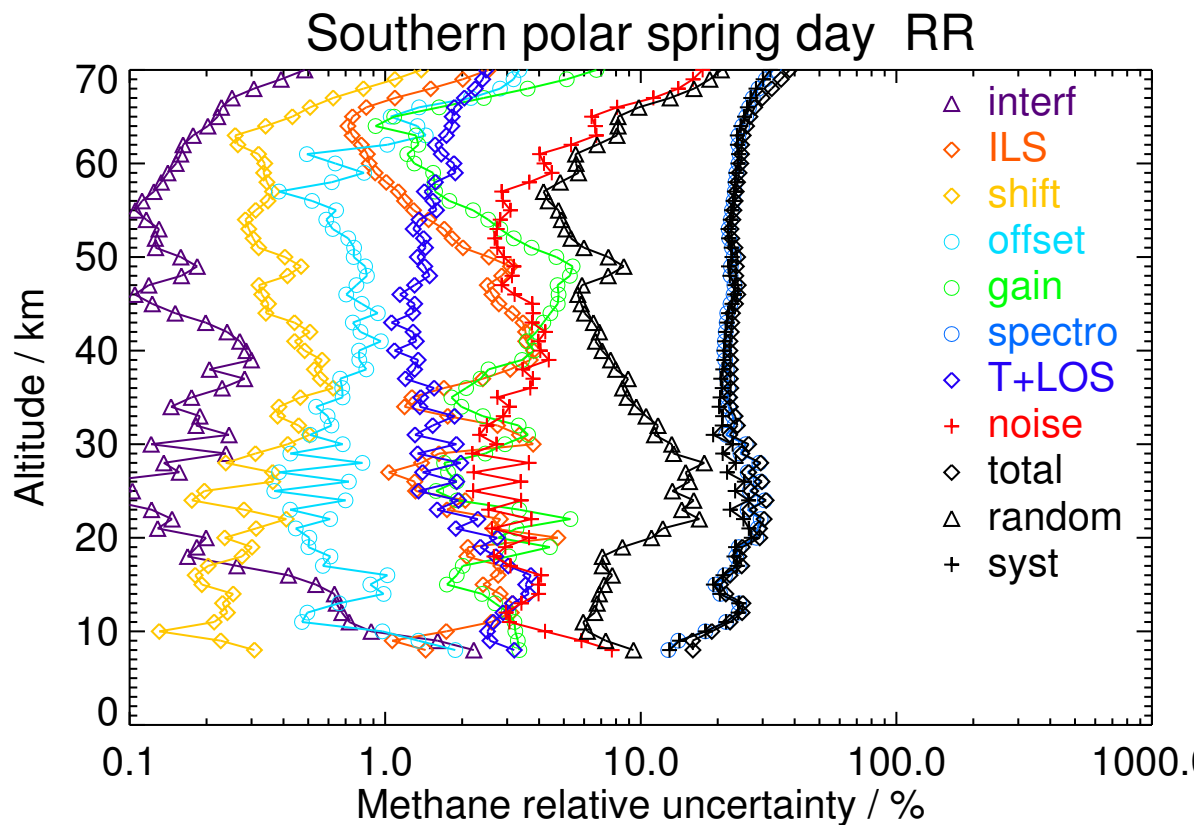

**Figure S63.** V8R\_CH4\_261 Southern polar spring day

**Table S64.** Methane error budget for Southern polar spring night. All uncertainties are  $1\sigma$ .

| altitude (km) | mean target (ppbv) | interf (ppbv) | ILS (ppbv) | shift (ppbv) | offset (ppbv) | gain (ppbv) | spectro (ppbv) | T+LOS (ppbv) | noise (ppbv) | random (ppbv) | syst (ppbv) | total (ppbv) |
|---------------|--------------------|---------------|------------|--------------|---------------|-------------|----------------|--------------|--------------|---------------|-------------|--------------|
| 9             | 1741.08            | 20.71         | 18.15      | 3.06         | 20.19         | 50.05       | 196.91         | 40.51        | 89.56        | 139.26        | 180.89      | 228.29       |
| 12            | 1699.11            | 7.72          | 32.32      | 2.67         | 7.91          | 37.61       | 367.09         | 38.97        | 45.61        | 121.32        | 355.28      | 375.43       |
| 15            | 1303.94            | 6.93          | 29.01      | 2.30         | 10.00         | 30.44       | 251.20         | 38.27        | 47.27        | 118.63        | 233.77      | 262.14       |
| 18            | 1203.67            | 1.86          | 32.57      | 3.52         | 6.54          | 44.23       | 286.54         | 29.21        | 29.91        | 86.50         | 281.86      | 294.84       |
| 21            | 1068.20            | 1.29          | 29.33      | 2.63         | 4.94          | 47.84       | 300.70         | 17.57        | 23.53        | 117.78        | 283.89      | 307.35       |
| 24            | 995.93             | 0.87          | 19.64      | 1.69         | 6.81          | 33.76       | 275.03         | 18.54        | 33.34        | 126.80        | 250.19      | 280.49       |
| 27            | 1042.79            | 1.21          | 11.82      | 2.35         | 3.54          | 24.92       | 247.79         | 13.41        | 19.37        | 116.30        | 221.83      | 250.47       |
| 30            | 997.60             | 0.88          | 34.40      | 3.68         | 6.73          | 30.72       | 264.42         | 19.16        | 26.07        | 121.89        | 241.45      | 270.47       |
| 33            | 816.08             | 1.18          | 10.03      | 3.07         | 4.61          | 27.86       | 207.60         | 15.17        | 21.51        | 91.14         | 190.76      | 211.42       |
| 36            | 546.94             | 1.35          | 14.70      | 3.02         | 3.70          | 19.28       | 139.37         | 8.46         | 19.14        | 55.06         | 132.07      | 143.09       |
| 39            | 404.46             | 0.89          | 18.58      | 1.97         | 3.55          | 23.32       | 98.22          | 5.56         | 16.66        | 36.61         | 97.57       | 104.22       |
| 42            | 330.85             | 0.65          | 14.46      | 1.80         | 3.05          | 20.98       | 79.58          | 4.38         | 13.48        | 27.54         | 80.23       | 84.83        |
| 45            | 274.22             | 0.38          | 9.00       | 1.20         | 2.74          | 19.32       | 69.09          | 3.89         | 11.35        | 23.60         | 69.45       | 73.35        |
| 48            | 277.71             | 0.40          | 8.42       | 1.51         | 3.14          | 22.73       | 71.65          | 4.36         | 9.65         | 27.09         | 71.49       | 76.45        |
| 52            | 270.32             | 0.39          | 3.43       | 0.74         | 2.00          | 10.27       | 63.28          | 3.66         | 7.77         | 15.64         | 62.89       | 64.81        |
| 56            | 247.06             | 0.38          | 2.34       | 0.84         | 1.37          | 4.76        | 57.75          | 3.98         | 7.87         | 12.48         | 57.34       | 58.68        |
| 60            | 207.93             | 0.37          | 1.21       | 0.61         | 1.43          | 2.45        | 50.41          | 4.20         | 9.66         | 14.52         | 49.51       | 51.59        |
| 64            | 166.13             | 0.38          | 1.15       | 0.50         | 2.46          | 1.72        | 41.87          | 3.43         | 12.63        | 16.43         | 40.81       | 43.99        |
| 68            | 135.66             | 0.54          | 3.21       | 1.32         | 4.29          | 6.79        | 39.58          | 3.95         | 21.69        | 25.01         | 38.78       | 46.15        |

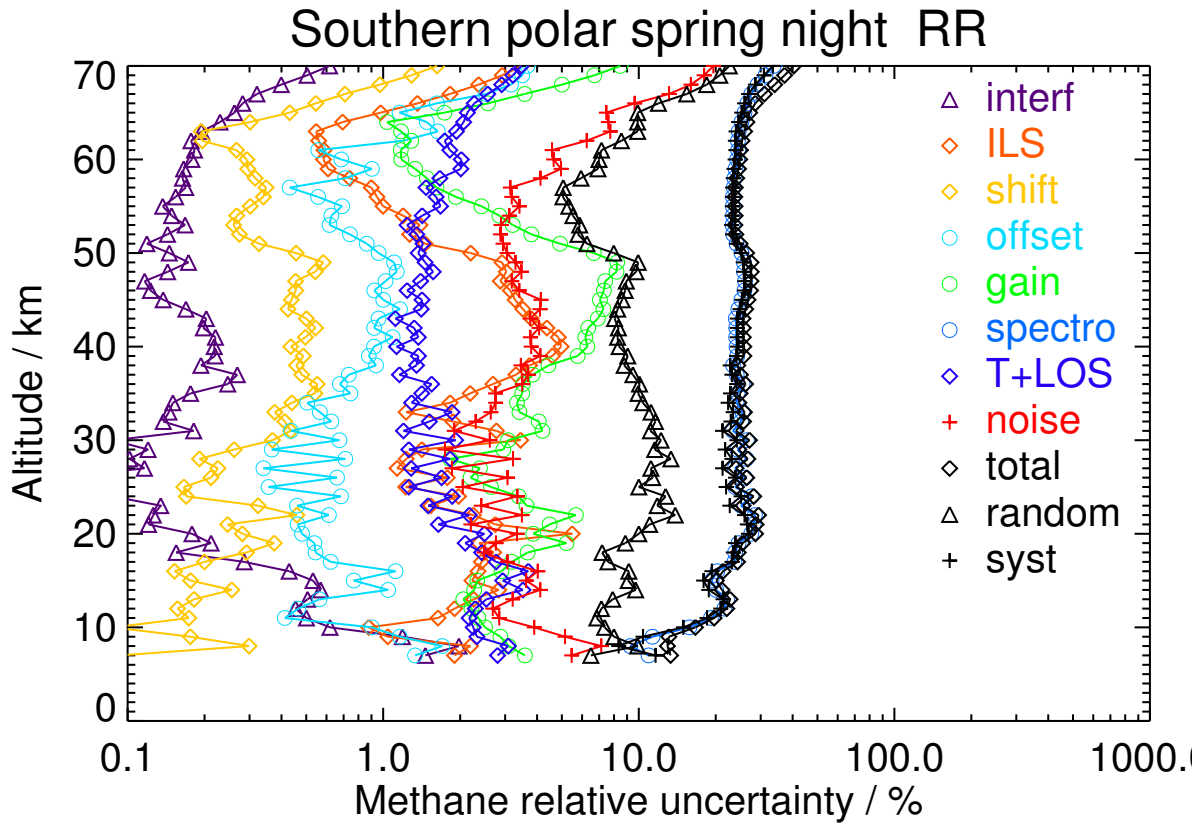

**Figure S64.** V8R\_CH4\_261 Southern polar spring night

**Table S65.** Methane error budget for Southern polar summer day. All uncertainties are  $1\sigma$ .

| altitude (km) | mean target (ppbv) | interf (ppbv) | ILS (ppbv) | shift (ppbv) | offset (ppbv) | gain (ppbv) | spectro (ppbv) | T+LOS (ppbv) | noise (ppbv) | random (ppbv) | syst (ppbv) | total (ppbv) |
|---------------|--------------------|---------------|------------|--------------|---------------|-------------|----------------|--------------|--------------|---------------|-------------|--------------|
| 9             | 1661.45            | 28.42         | 55.98      | 3.99         | 19.38         | 22.06       | 170.08         | 40.59        | 90.43        | 121.44        | 169.78      | 208.74       |
| 12            | 1745.99            | 5.40          | 36.69      | 1.73         | 6.35          | 46.10       | 388.18         | 31.71        | 36.17        | 70.81         | 389.27      | 395.66       |
| 15            | 1608.64            | 8.42          | 40.71      | 3.36         | 7.93          | 30.54       | 323.54         | 31.49        | 36.02        | 74.33         | 322.77      | 331.22       |
| 18            | 1453.60            | 2.45          | 56.19      | 5.33         | 5.58          | 34.46       | 370.13         | 26.04        | 27.01        | 61.23         | 372.92      | 377.91       |
| 21            | 1143.23            | 1.69          | 56.99      | 5.53         | 5.05          | 24.78       | 302.30         | 18.40        | 21.29        | 51.30         | 305.72      | 310.00       |
| 24            | 1155.06            | 0.88          | 27.76      | 1.56         | 7.93          | 14.74       | 314.16         | 21.29        | 32.28        | 48.87         | 314.42      | 318.19       |
| 27            | 1008.43            | 0.70          | 8.83       | 3.97         | 2.94          | 10.53       | 207.77         | 12.79        | 17.59        | 30.18         | 207.23      | 209.41       |
| 30            | 938.30             | 1.09          | 47.35      | 2.00         | 6.89          | 13.64       | 221.96         | 19.23        | 25.46        | 37.80         | 226.58      | 229.71       |
| 33            | 758.15             | 0.98          | 17.42      | 2.47         | 4.36          | 21.34       | 152.10         | 13.58        | 19.49        | 27.90         | 153.96      | 156.47       |
| 36            | 584.72             | 2.36          | 11.34      | 4.23         | 4.07          | 14.78       | 119.41         | 7.53         | 17.99        | 24.94         | 120.02      | 122.58       |
| 39            | 414.25             | 1.25          | 14.48      | 1.69         | 3.40          | 15.50       | 94.27          | 5.45         | 16.23        | 21.51         | 95.83       | 98.22        |
| 42            | 267.73             | 0.37          | 14.24      | 1.51         | 2.14          | 12.50       | 65.91          | 3.82         | 12.19        | 19.21         | 67.11       | 69.81        |
| 45            | 163.22             | 0.31          | 8.49       | 1.10         | 1.90          | 11.07       | 39.46          | 2.46         | 10.37        | 17.04         | 39.75       | 43.25        |
| 48            | 83.63              | 0.19          | 2.31       | 0.39         | 1.19          | 2.92        | 19.43          | 1.08         | 7.31         | 9.85          | 18.72       | 21.15        |
| 52            | 56.75              | 0.10          | 1.25       | 0.37         | 0.96          | 1.21        | 14.71          | 0.67         | 5.66         | 7.58          | 13.99       | 15.91        |
| 56            | 65.39              | 0.06          | 0.71       | 0.10         | 0.74          | 1.23        | 17.18          | 0.74         | 3.83         | 6.67          | 16.39       | 17.69        |
| 60            | 104.53             | 0.21          | 0.80       | 0.53         | 0.86          | 1.72        | 30.12          | 1.26         | 4.78         | 16.48         | 25.78       | 30.60        |
| 64            | 103.72             | 0.35          | 1.13       | 0.44         | 1.72          | 1.66        | 29.24          | 1.41         | 7.64         | 14.95         | 26.44       | 30.38        |
| 68            | 114.61             | 0.43          | 2.15       | 0.88         | 3.55          | 1.77        | 33.44          | 1.81         | 15.55        | 19.00         | 31.99       | 37.20        |

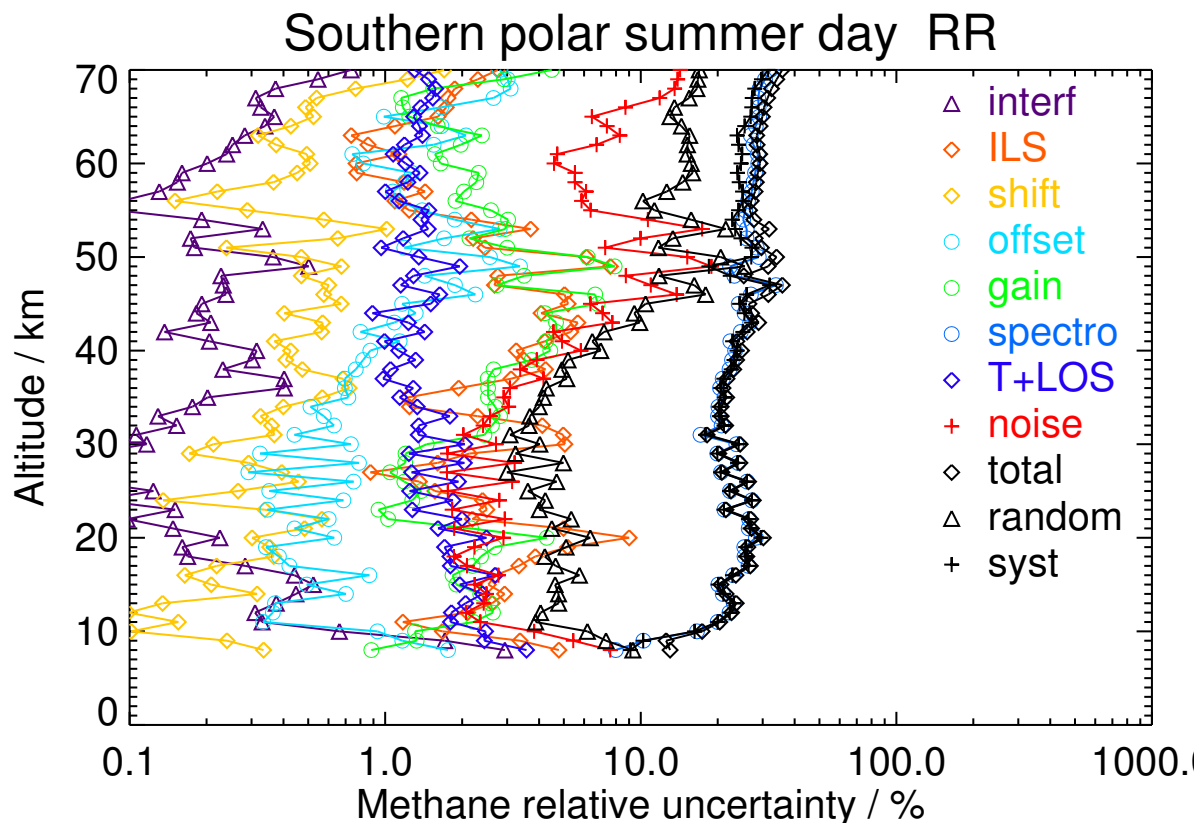

**Figure S65.** V8R\_CH4\_261 Southern polar summer day

**Table S66.** Methane error budget for Southern polar summer night. All uncertainties are  $1\sigma$ .

| altitude<br>(km) | mean target<br>(ppbv) | interf<br>(ppbv) | ILS<br>(ppbv) | shift<br>(ppbv) | offset<br>(ppbv) | gain<br>(ppbv) | spectro<br>(ppbv) | T+LOS<br>(ppbv) | noise<br>(ppbv) | random<br>(ppbv) | syst<br>(ppbv) | total<br>(ppbv) |
|------------------|-----------------------|------------------|---------------|-----------------|------------------|----------------|-------------------|-----------------|-----------------|------------------|----------------|-----------------|
| 9                | 1714.68               | 23.71            | 33.17         | 2.74            | 21.68            | 38.12          | 254.33            | 49.95           | 90.37           | 163.98           | 228.14         | 280.96          |
| 12               | 1759.22               | 6.39             | 35.99         | 1.68            | 6.30             | 50.44          | 382.16            | 34.18           | 40.26           | 74.51            | 383.68         | 390.85          |
| 15               | 1661.62               | 7.61             | 91.80         | 3.50            | 12.09            | 88.81          | 332.69            | 42.92           | 43.59           | 113.20           | 343.72         | 361.88          |
| 18               | 1526.14               | 3.17             | 53.58         | 5.73            | 10.98            | 112.21         | 352.73            | 30.40           | 32.87           | 91.31            | 365.66         | 376.89          |
| 21               | 1184.97               | 1.65             | 42.94         | 4.15            | 4.25             | 36.43          | 296.18            | 23.91           | 31.83           | 65.65            | 296.99         | 304.16          |
| 24               | 1136.63               | 0.72             | 15.73         | 1.16            | 7.82             | 18.87          | 301.52            | 21.68           | 32.69           | 47.04            | 301.50         | 305.15          |
| 27               | 976.40                | 0.84             | 9.50          | 3.36            | 3.96             | 9.19           | 198.43            | 14.13           | 21.52           | 30.66            | 198.24         | 200.60          |
| 30               | 894.71                | 1.36             | 46.36         | 1.79            | 6.54             | 14.09          | 216.43            | 17.08           | 23.50           | 34.64            | 221.09         | 223.79          |
| 33               | 718.12                | 1.75             | 7.18          | 3.40            | 4.86             | 22.46          | 139.14            | 10.77           | 17.48           | 25.22            | 140.50         | 142.75          |
| 36               | 515.08                | 2.51             | 16.91         | 2.88            | 4.49             | 17.23          | 105.27            | 6.85            | 15.31           | 21.86            | 107.25         | 109.46          |
| 39               | 359.08                | 0.92             | 15.09         | 1.25            | 3.15             | 14.71          | 81.04             | 4.91            | 12.65           | 19.88            | 82.54          | 84.90           |
| 42               | 194.95                | 0.42             | 10.83         | 1.68            | 2.20             | 12.32          | 49.27             | 2.88            | 9.25            | 17.39            | 49.96          | 52.90           |
| 45               | 117.49                | 0.32             | 2.89          | 0.72            | 1.33             | 6.29           | 31.62             | 1.60            | 7.47            | 12.82            | 30.73          | 33.29           |
| 48               | 73.05                 | 0.11             | 1.49          | 0.26            | 0.93             | 1.60           | 19.26             | 0.80            | 5.99            | 7.41             | 18.93          | 20.33           |
| 52               | 54.96                 | 0.06             | 0.71          | 0.24            | 0.76             | 1.27           | 13.49             | 0.59            | 3.84            | 4.95             | 13.25          | 14.14           |
| 56               | 66.06                 | 0.06             | 0.58          | 0.17            | 0.78             | 1.00           | 17.07             | 0.90            | 3.90            | 6.56             | 16.32          | 17.59           |
| 60               | 116.40                | 0.27             | 0.90          | 0.56            | 1.16             | 1.97           | 30.77             | 1.60            | 6.20            | 15.19            | 27.63          | 31.53           |
| 64               | 122.98                | 0.38             | 0.83          | 0.51            | 2.26             | 1.87           | 31.75             | 1.94            | 9.76            | 13.54            | 30.55          | 33.42           |
| 68               | 146.34                | 0.66             | 0.85          | 1.38            | 4.03             | 2.89           | 39.77             | 2.99            | 18.38           | 20.54            | 39.16          | 44.22           |

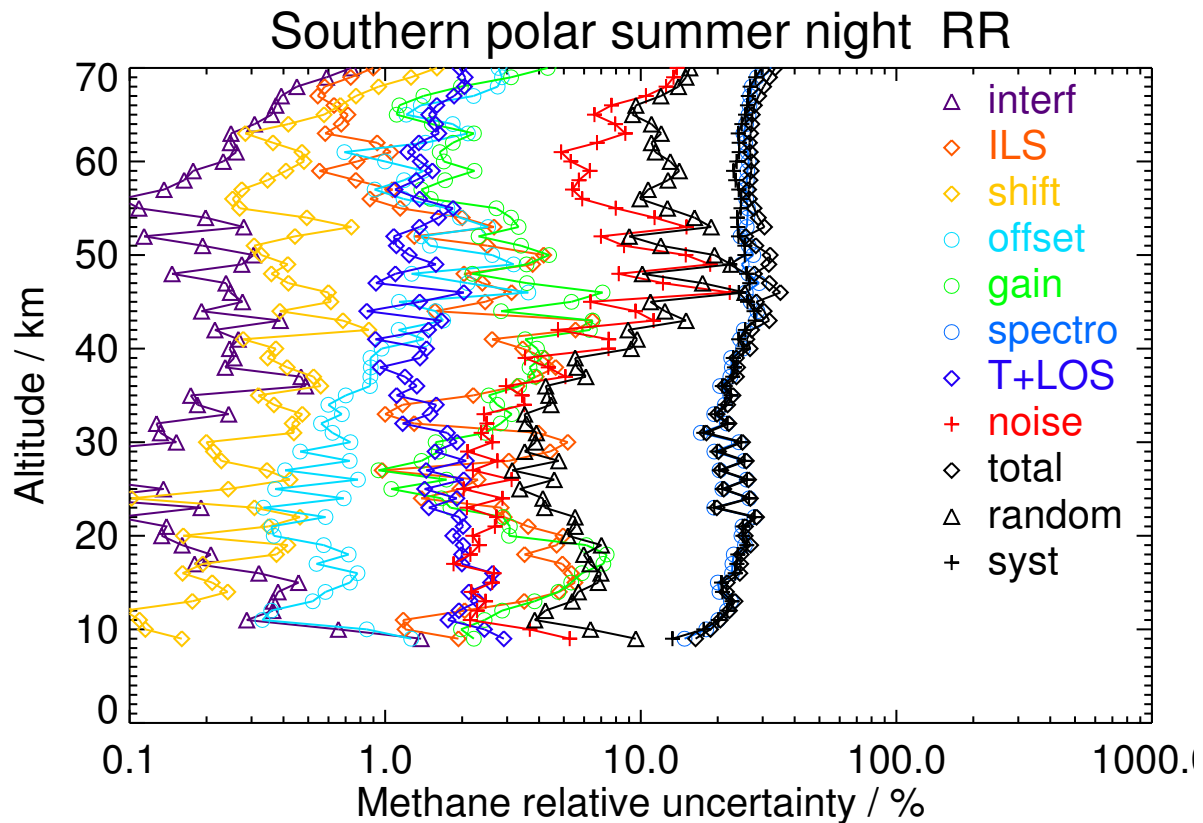**Figure S66.** V8R\_CH4\_261 Southern polar summer night

**Table S67.** Methane error budget for Southern polar autumn day. All uncertainties are  $1\sigma$ .

| altitude<br>(km) | mean target<br>(ppbv) | interf<br>(ppbv) | ILS<br>(ppbv) | shift<br>(ppbv) | offset<br>(ppbv) | gain<br>(ppbv) | spectro<br>(ppbv) | T+LOS<br>(ppbv) | noise<br>(ppbv) | random<br>(ppbv) | syst<br>(ppbv) | total<br>(ppbv) |
|------------------|-----------------------|------------------|---------------|-----------------|------------------|----------------|-------------------|-----------------|-----------------|------------------|----------------|-----------------|
| 12               | 1802.40               | 9.82             | 41.08         | 1.61            | 5.72             | 55.81          | 390.19            | 33.68           | 36.21           | 56.97            | 395.45         | 399.54          |
| 15               | 1658.54               | 16.15            | 39.00         | 2.30            | 9.87             | 46.08          | 336.66            | 39.24           | 43.21           | 68.00            | 340.78         | 347.49          |
| 18               | 1464.13               | 7.07             | 27.17         | 4.60            | 6.27             | 75.76          | 346.54            | 27.77           | 31.46           | 56.33            | 353.93         | 358.39          |
| 21               | 1195.32               | 1.62             | 23.31         | 2.47            | 5.28             | 64.43          | 291.74            | 19.52           | 28.62           | 44.96            | 298.36         | 301.73          |
| 24               | 1065.32               | 1.48             | 9.45          | 2.14            | 8.73             | 43.88          | 252.43            | 24.09           | 43.01           | 55.10            | 255.37         | 261.24          |
| 27               | 866.97                | 1.40             | 8.26          | 0.91            | 5.02             | 17.43          | 202.70            | 17.45           | 30.52           | 40.65            | 202.66         | 206.70          |
| 30               | 667.87                | 0.98             | 14.71         | 2.04            | 8.82             | 9.11           | 170.40            | 19.98           | 35.95           | 49.34            | 169.34         | 176.38          |
| 33               | 428.95                | 1.67             | 4.96          | 1.56            | 6.00             | 8.17           | 109.38            | 13.71           | 28.54           | 40.61            | 107.00         | 114.45          |
| 36               | 191.99                | 0.89             | 6.55          | 0.85            | 3.99             | 7.71           | 51.57             | 6.76            | 22.14           | 30.46            | 48.86          | 57.57           |
| 39               | 80.41                 | 0.59             | 3.72          | 0.81            | 2.63             | 4.31           | 22.32             | 3.22            | 16.47           | 22.16            | 18.15          | 28.64           |
| 42               | 69.54                 | 0.29             | 1.67          | 0.49            | 2.22             | 3.27           | 19.51             | 2.10            | 13.00           | 17.69            | 16.11          | 23.93           |
| 45               | 92.77                 | 0.13             | 1.27          | 0.28            | 2.01             | 3.87           | 23.60             | 2.10            | 10.75           | 15.63            | 21.28          | 26.41           |
| 48               | 158.39                | 0.18             | 1.68          | 0.17            | 2.27             | 7.14           | 36.86             | 3.15            | 9.25            | 14.35            | 36.15          | 38.90           |
| 52               | 210.70                | 0.22             | 1.70          | 0.16            | 2.03             | 7.90           | 47.52             | 3.59            | 7.59            | 11.76            | 47.54          | 48.97           |
| 56               | 182.69                | 0.11             | 2.02          | 0.22            | 1.46             | 5.45           | 44.49             | 3.25            | 8.01            | 12.73            | 43.91          | 45.71           |
| 60               | 122.59                | 0.04             | 1.51          | 0.13            | 1.61             | 3.17           | 32.02             | 2.52            | 10.40           | 13.79            | 31.06          | 33.99           |
| 64               | 64.87                 | 0.17             | 0.77          | 0.11            | 2.79             | 1.37           | 18.45             | 1.39            | 13.73           | 15.64            | 17.23          | 23.27           |
| 68               | 31.88                 | 0.17             | 0.82          | 0.46            | 4.47             | 0.87           | 13.68             | 1.06            | 21.16           | 22.84            | 11.65          | 25.64           |

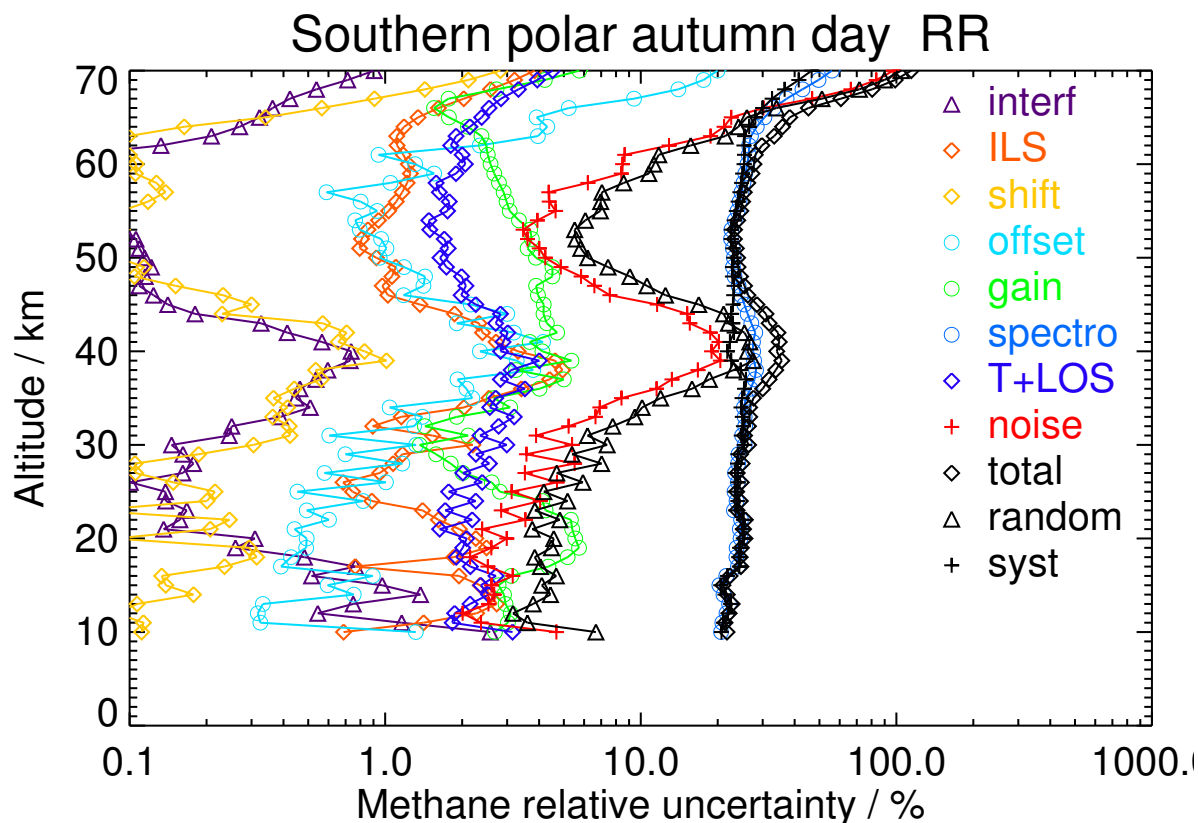

**Figure S67.** V8R\_CH4\_261 Southern polar autumn day

**Table S68.** Methane error budget for Southern polar autumn night. All uncertainties are  $1\sigma$ .

| altitude<br>(km) | mean target<br>(ppbv) | interf<br>(ppbv) | ILS<br>(ppbv) | shift<br>(ppbv) | offset<br>(ppbv) | gain<br>(ppbv) | spectro<br>(ppbv) | T+LOS<br>(ppbv) | noise<br>(ppbv) | random<br>(ppbv) | syst<br>(ppbv) | total<br>(ppbv) |
|------------------|-----------------------|------------------|---------------|-----------------|------------------|----------------|-------------------|-----------------|-----------------|------------------|----------------|-----------------|
| 9                | 1832.48               | 33.80            | 14.24         | 2.29            | 24.14            | 57.38          | 308.89            | 52.58           | 92.91           | 158.28           | 294.94         | 334.72          |
| 12               | 1766.14               | 9.57             | 39.15         | 1.56            | 5.91             | 62.32          | 387.13            | 36.03           | 39.65           | 66.99            | 392.17         | 397.85          |
| 15               | 1604.44               | 12.25            | 32.90         | 2.21            | 11.50            | 59.69          | 314.37            | 42.45           | 46.60           | 78.63            | 318.67         | 328.22          |
| 18               | 1383.84               | 6.07             | 22.16         | 2.91            | 8.23             | 93.24          | 292.98            | 30.98           | 33.55           | 65.38            | 304.87         | 311.80          |
| 21               | 1138.28               | 2.04             | 17.68         | 2.35            | 6.01             | 65.24          | 257.84            | 21.41           | 31.22           | 51.58            | 264.32         | 269.31          |
| 24               | 1016.33               | 1.33             | 13.95         | 2.11            | 8.83             | 38.77          | 237.93            | 24.40           | 43.89           | 60.59            | 239.26         | 246.81          |
| 27               | 795.27                | 1.21             | 9.58          | 0.90            | 5.08             | 13.68          | 186.09            | 17.44           | 30.62           | 42.02            | 185.51         | 190.21          |
| 30               | 595.02                | 0.89             | 8.85          | 1.16            | 8.58             | 9.27           | 159.52            | 18.75           | 34.43           | 48.60            | 157.67         | 164.99          |
| 33               | 324.63                | 1.58             | 6.16          | 1.39            | 5.83             | 12.21          | 84.65             | 11.30           | 26.06           | 40.70            | 80.88          | 90.54           |
| 36               | 132.26                | 0.74             | 5.32          | 0.91            | 3.70             | 6.37           | 37.71             | 5.15            | 19.59           | 27.81            | 33.80          | 43.77           |
| 39               | 59.49                 | 0.37             | 2.34          | 0.75            | 2.59             | 6.16           | 17.28             | 2.46            | 14.66           | 19.84            | 13.29          | 23.88           |
| 42               | 64.35                 | 0.20             | 1.62          | 0.43            | 2.06             | 2.71           | 16.71             | 1.95            | 11.82           | 14.87            | 14.70          | 20.91           |
| 45               | 115.55                | 0.14             | 0.98          | 0.30            | 2.14             | 5.39           | 28.52             | 2.47            | 10.53           | 15.06            | 27.17          | 31.07           |
| 48               | 175.25                | 0.18             | 1.69          | 0.13            | 2.30             | 8.02           | 40.31             | 3.53            | 9.14            | 12.49            | 40.46          | 42.34           |
| 52               | 194.81                | 0.21             | 1.80          | 0.22            | 1.87             | 7.75           | 45.40             | 3.42            | 7.34            | 11.79            | 45.33          | 46.84           |
| 56               | 145.90                | 0.11             | 1.88          | 0.24            | 1.31             | 4.16           | 36.80             | 2.72            | 7.36            | 12.65            | 35.75          | 37.92           |
| 60               | 96.87                 | 0.05             | 1.23          | 0.13            | 1.51             | 2.62           | 26.45             | 2.07            | 9.41            | 14.77            | 24.19          | 28.34           |
| 64               | 47.38                 | 0.17             | 0.63          | 0.08            | 2.67             | 1.02           | 14.15             | 1.17            | 12.96           | 14.91            | 12.49          | 19.45           |
| 68               | 26.13                 | 0.16             | 0.73          | 0.40            | 4.39             | 0.81           | 10.37             | 1.02            | 20.73           | 21.99            | 8.68           | 23.64           |

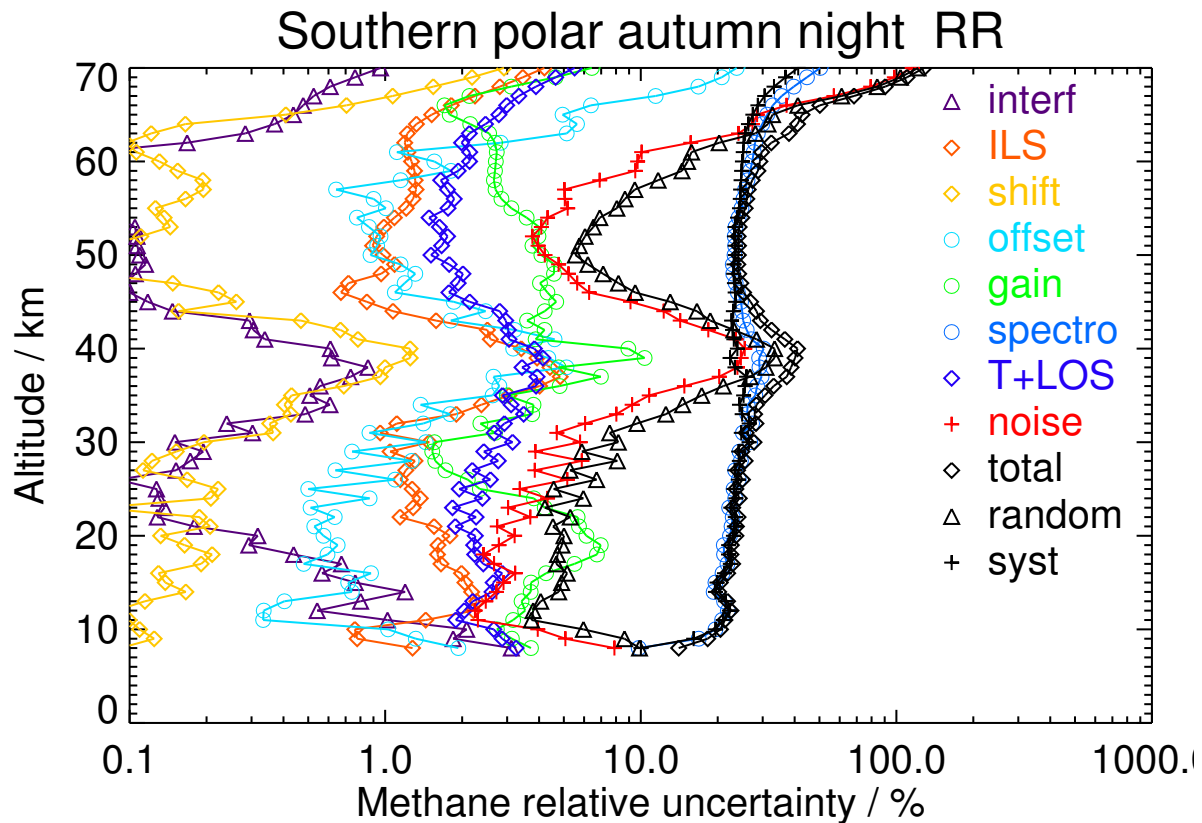**Figure S68.** V8R\_CH4\_261 Southern polar autumn night

**S4 Methane error contribution profile plots and  
tabulated values for RR MA data (V8R\_CH4\_561)**



**Table S69.** Methane error budget for Northern polar winter day. All uncertainties are  $1\sigma$ .

| altitude<br>(km) | mean target<br>(ppbv) | NLTE<br>(ppbv) | interf<br>(ppbv) | ILS<br>(ppbv) | shift<br>(ppbv) | offset<br>(ppbv) | gain<br>(ppbv) | spectro<br>(ppbv) | T+LOS<br>(ppbv) | noise<br>(ppbv) | random<br>(ppbv) | syst<br>(ppbv) | total<br>(ppbv) |
|------------------|-----------------------|----------------|------------------|---------------|-----------------|------------------|----------------|-------------------|-----------------|-----------------|------------------|----------------|-----------------|
| 30               | 1026.40               | 0.14           | 3.01             | 10.92         | 4.47            | 13.68            | 99.50          | 221.72            | 18.30           | 29.03           | 77.91            | 233.46         | 246.12          |
| 35               | 554.29                | 0.13           | 2.19             | 11.71         | 1.28            | 4.66             | 22.91          | 139.22            | 9.62            | 21.84           | 51.76            | 134.02         | 143.67          |
| 40               | 348.69                | 0.15           | 1.44             | 6.71          | 0.90            | 5.73             | 10.33          | 73.04             | 6.35            | 27.52           | 33.05            | 72.30          | 79.49           |
| 45               | 266.34                | 0.25           | 0.64             | 4.04          | 0.31            | 2.75             | 11.21          | 53.67             | 5.06            | 18.68           | 22.68            | 53.76          | 58.35           |
| 50               | 158.11                | 0.33           | 0.18             | 1.30          | 0.08            | 2.44             | 4.60           | 34.96             | 3.79            | 14.17           | 15.91            | 34.82          | 38.29           |
| 55               | 139.49                | 0.38           | 0.05             | 0.85          | 0.08            | 2.47             | 3.08           | 32.67             | 3.46            | 14.73           | 15.76            | 32.63          | 36.23           |
| 60               | 74.68                 | 0.22           | 0.07             | 0.88          | 0.05            | 1.69             | 1.37           | 19.63             | 2.08            | 14.46           | 15.73            | 18.90          | 24.59           |
| 65               | 25.50                 | 0.10           | 0.13             | 0.44          | 0.09            | 1.85             | 0.45           | 8.92              | 0.91            | 17.95           | 18.77            | 7.35           | 20.16           |
| 70               | 15.64                 | 0.13           | 0.19             | 0.44          | 0.16            | 3.23             | 0.89           | 6.76              | 0.72            | 22.80           | 23.46            | 5.22           | 24.03           |
| 74               | -4.87                 | 0.18           | 0.28             | 0.71          | 0.21            | 6.97             | 1.31           | 6.29              | 0.61            | 32.83           | 33.84            | 4.85           | 34.19           |
| 80               | -14.86                | 0.27           | 0.45             | 1.08          | 0.24            | 11.74            | 2.40           | 7.20              | 0.47            | 45.28           | 47.02            | 6.02           | 47.40           |
| 84               | -9.12                 | 0.18           | 0.27             | 0.77          | 0.14            | 8.41             | 1.54           | 4.23              | 0.19            | 30.74           | 31.96            | 3.88           | 32.19           |

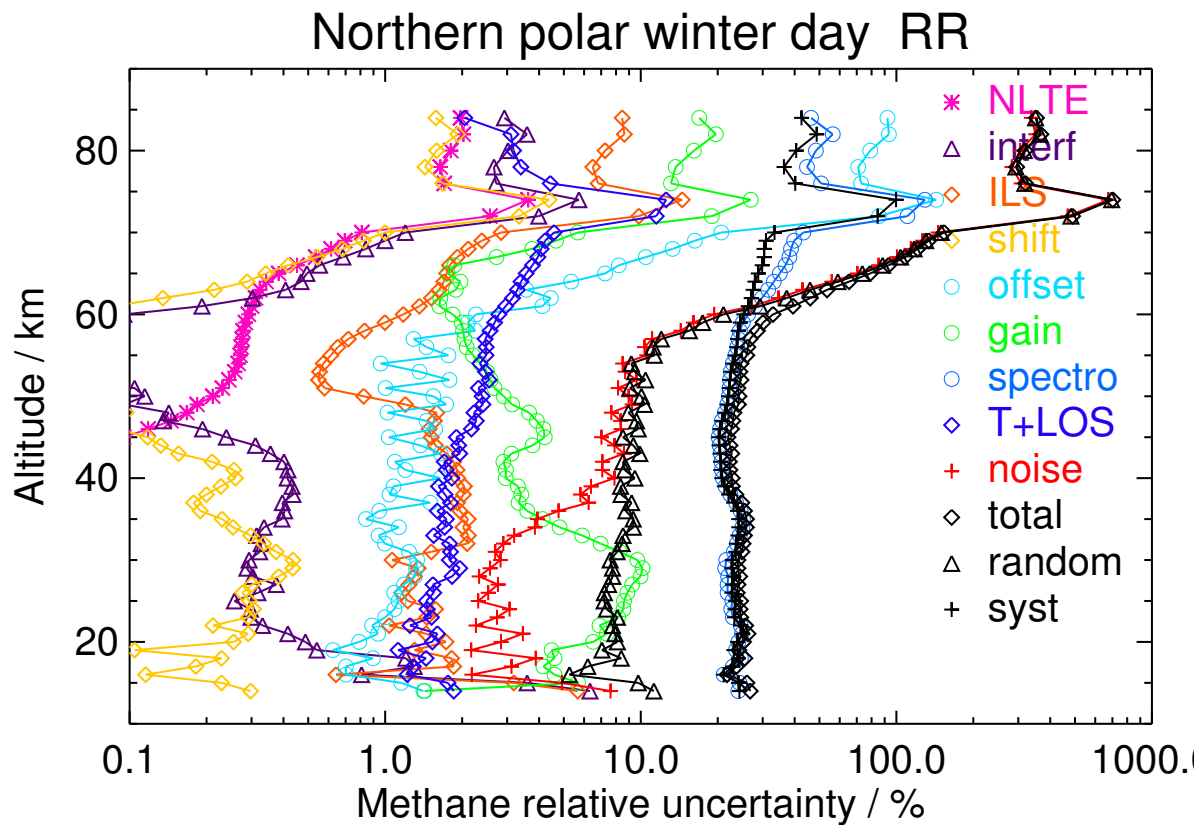**Figure S69.** V8R\_CH4\_561 Northern polar winter day

**Table S70.** Methane error budget for Northern polar winter night. All uncertainties are  $1\sigma$ .

| altitude (km) | mean target (ppbv) | NLTE (ppbv) | interf (ppbv) | ILS (ppbv) | shift (ppbv) | offset (ppbv) | gain (ppbv) | spectro (ppbv) | T+LOS (ppbv) | noise (ppbv) | random (ppbv) | syst (ppbv) | total (ppbv) |
|---------------|--------------------|-------------|---------------|------------|--------------|---------------|-------------|----------------|--------------|--------------|---------------|-------------|--------------|
| 30            | 510.74             | 0.09        | 1.40          | 6.09       | 2.73         | 10.22         | 66.80       | 163.48         | 11.96        | 27.16        | 119.70        | 133.76      | 179.50       |
| 35            | 373.83             | 0.08        | 2.33          | 7.46       | 1.09         | 5.32          | 22.87       | 105.68         | 7.20         | 24.48        | 63.88         | 91.39       | 111.50       |
| 40            | 244.09             | 0.09        | 1.07          | 6.25       | 0.96         | 5.06          | 12.85       | 64.79          | 5.45         | 23.13        | 38.04         | 59.56       | 70.67        |
| 45            | 182.36             | 0.14        | 0.46          | 3.68       | 0.28         | 2.31          | 7.97        | 45.50          | 3.66         | 15.39        | 23.66         | 42.93       | 49.02        |
| 50            | 146.79             | 0.19        | 0.12          | 1.48       | 0.11         | 2.02          | 5.06        | 34.74          | 2.96         | 11.27        | 13.28         | 34.61       | 37.07        |
| 55            | 122.99             | 0.23        | 0.05          | 1.21       | 0.07         | 1.99          | 2.60        | 29.39          | 2.69         | 11.89        | 13.26         | 29.13       | 32.01        |
| 60            | 74.30              | 0.26        | 0.07          | 1.19       | 0.04         | 2.05          | 1.44        | 19.06          | 1.68         | 13.18        | 14.41         | 18.44       | 23.40        |
| 65            | 38.23              | 0.28        | 0.10          | 0.66       | 0.11         | 1.59          | 0.74        | 12.12          | 1.03         | 16.10        | 17.36         | 10.45       | 20.26        |
| 70            | 30.35              | 0.30        | 0.12          | 0.34       | 0.30         | 3.04          | 0.85        | 10.84          | 1.02         | 21.72        | 22.97         | 8.56        | 24.51        |
| 74            | 8.71               | 0.40        | 0.28          | 0.82       | 0.89         | 6.67          | 1.50        | 10.82          | 1.06         | 32.77        | 34.27         | 8.13        | 35.22        |
| 80            | -7.18              | 0.64        | 0.54          | 1.72       | 1.77         | 10.58         | 3.32        | 11.39          | 0.99         | 43.18        | 45.32         | 8.43        | 46.10        |
| 84            | -2.99              | 0.54        | 0.20          | 0.91       | 0.27         | 8.14          | 1.04        | 3.81           | 0.24         | 30.68        | 31.89         | 2.72        | 32.01        |

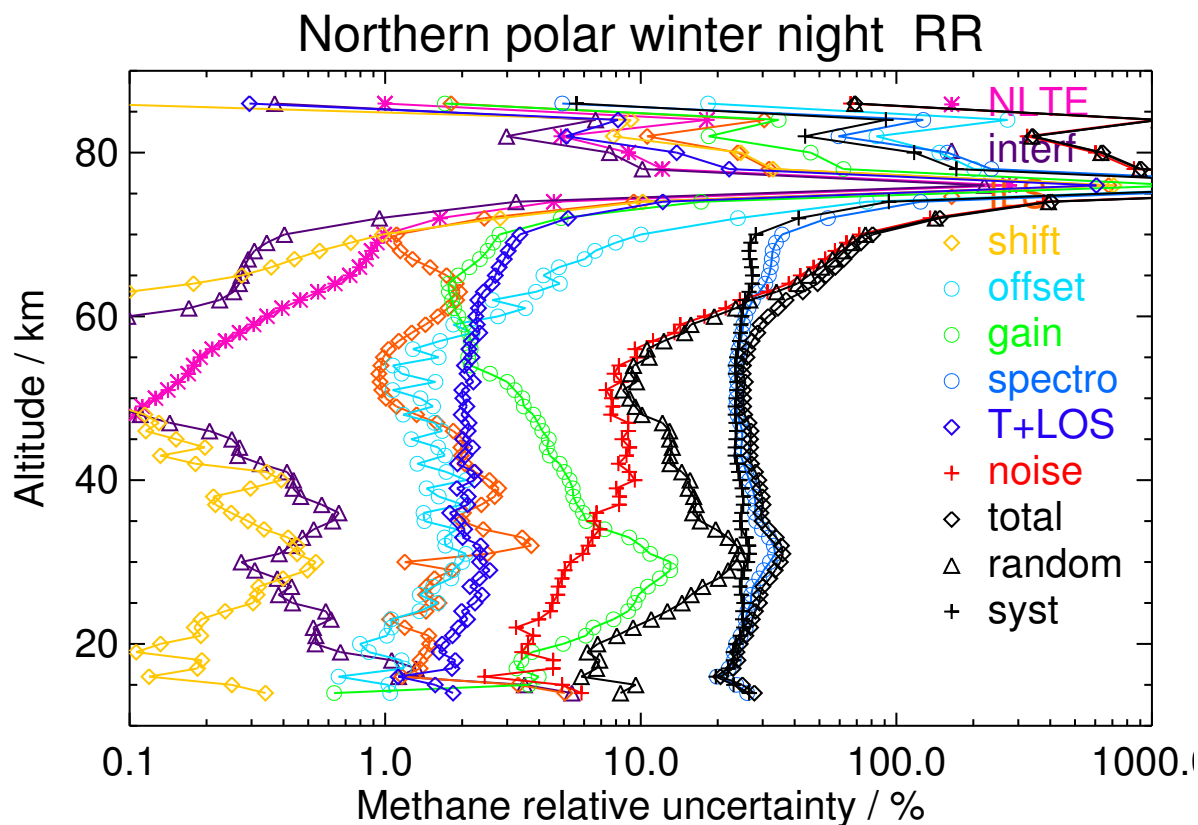

**Figure S70.** V8R\_CH4\_561 Northern polar winter night

**Table S71.** Methane error budget for Northern polar spring day. All uncertainties are  $1\sigma$ .

| altitude<br>(km) | mean target<br>(ppbv) | NLTE<br>(ppbv) | interf<br>(ppbv) | ILS<br>(ppbv) | shift<br>(ppbv) | offset<br>(ppbv) | gain<br>(ppbv) | spectro<br>(ppbv) | T+LOS<br>(ppbv) | noise<br>(ppbv) | random<br>(ppbv) | syst<br>(ppbv) | total<br>(ppbv) |
|------------------|-----------------------|----------------|------------------|---------------|-----------------|------------------|----------------|-------------------|-----------------|-----------------|------------------|----------------|-----------------|
| 30               | 762.85                | 0.03           | 0.89             | 11.66         | 2.03            | 6.66             | 14.50          | 187.09            | 15.52           | 27.28           | 39.61            | 186.58         | 190.74          |
| 35               | 390.19                | 0.06           | 0.71             | 4.19          | 1.27            | 4.31             | 10.17          | 92.07             | 8.91            | 24.79           | 30.30            | 91.62          | 96.50           |
| 40               | 259.34                | 0.11           | 0.73             | 3.18          | 1.45            | 3.14             | 6.17           | 56.19             | 4.25            | 14.07           | 17.13            | 56.04          | 58.60           |
| 45               | 141.42                | 0.10           | 0.30             | 2.37          | 0.32            | 1.91             | 3.63           | 34.57             | 1.66            | 11.04           | 17.23            | 32.34          | 36.64           |
| 50               | 95.87                 | 0.14           | 0.13             | 1.11          | 0.15            | 1.25             | 2.47           | 27.33             | 1.26            | 7.35            | 17.94            | 22.12          | 28.48           |
| 55               | 95.05                 | 0.16           | 0.05             | 1.13          | 0.10            | 1.17             | 1.70           | 25.36             | 1.50            | 5.66            | 13.22            | 22.55          | 26.14           |
| 60               | 78.56                 | 0.19           | 0.09             | 1.13          | 0.07            | 2.35             | 1.40           | 21.46             | 1.31            | 9.24            | 13.89            | 19.07          | 23.59           |
| 65               | 50.53                 | 0.14           | 0.11             | 0.53          | 0.09            | 0.74             | 0.77           | 13.93             | 0.93            | 10.74           | 12.62            | 12.35          | 17.66           |
| 70               | 27.50                 | 0.15           | 0.19             | 1.02          | 0.39            | 1.98             | 1.55           | 9.67              | 0.78            | 18.04           | 18.98            | 8.17           | 20.67           |
| 74               | 1.99                  | 0.53           | 0.75             | 3.53          | 1.85            | 4.75             | 7.19           | 16.31             | 1.17            | 29.04           | 31.84            | 13.72          | 34.67           |
| 80               | -20.46                | 0.99           | 1.54             | 6.31          | 4.26            | 9.20             | 13.43          | 29.74             | 1.38            | 43.73           | 48.97            | 26.95          | 55.90           |
| 84               | -14.33                | 0.66           | 1.04             | 4.12          | 2.97            | 6.51             | 8.96           | 20.12             | 0.59            | 29.05           | 32.10            | 19.20          | 37.40           |

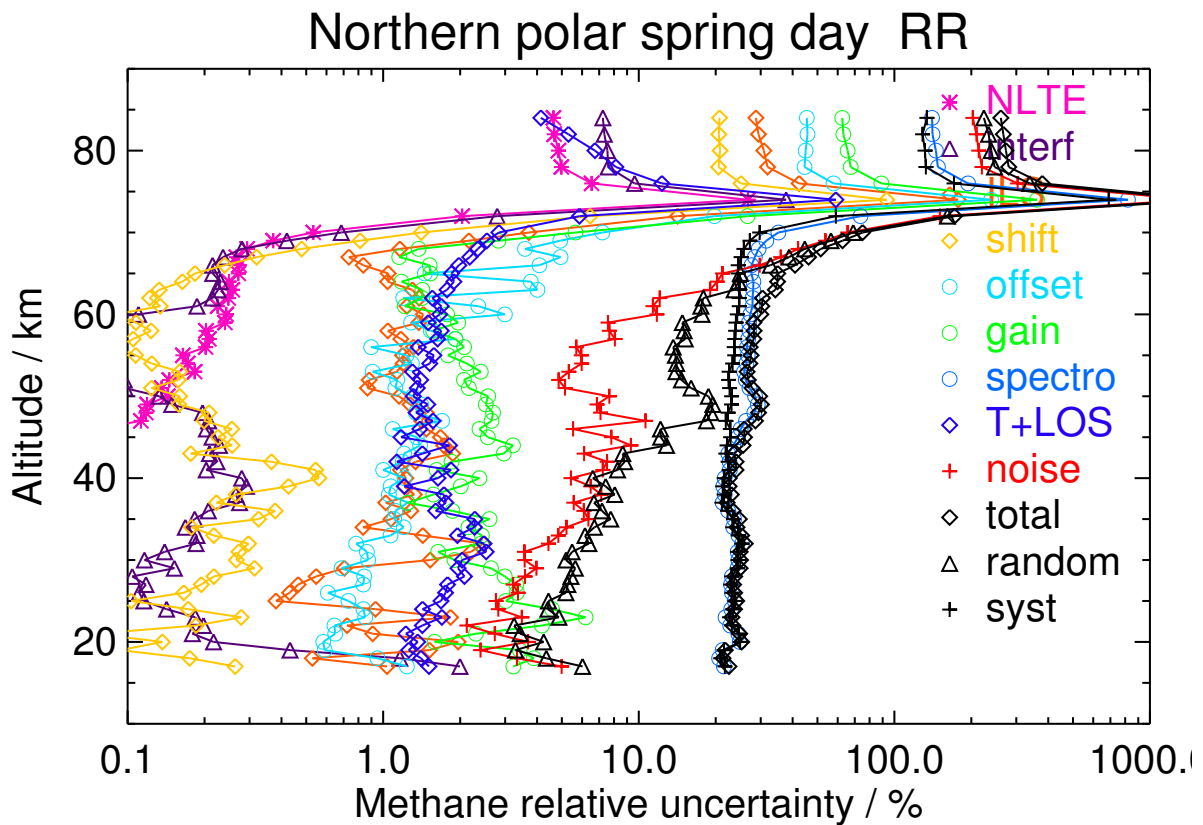**Figure S71.** V8R\_CH4\_561 Northern polar spring day

**Table S72.** Methane error budget for Northern polar spring night. All uncertainties are  $1\sigma$ .

| altitude (km) | mean target (ppbv) | NLTE (ppbv) | interf (ppbv) | ILS (ppbv) | shift (ppbv) | offset (ppbv) | gain (ppbv) | spectro (ppbv) | T+LOS (ppbv) | noise (ppbv) | random (ppbv) | syst (ppbv) | total (ppbv) |
|---------------|--------------------|-------------|---------------|------------|--------------|---------------|-------------|----------------|--------------|--------------|---------------|-------------|--------------|
| 30            | 777.97             | 0.02        | 0.79          | 11.22      | 2.10         | 6.28          | 10.93       | 191.65         | 15.11        | 26.48        | 40.66         | 190.52      | 194.81       |
| 35            | 432.97             | 0.03        | 0.71          | 2.98       | 1.31         | 4.22          | 10.42       | 102.38         | 9.29         | 23.33        | 29.25         | 101.95      | 106.06       |
| 40            | 300.81             | 0.08        | 0.83          | 2.62       | 1.65         | 3.44          | 6.60        | 65.70          | 4.79         | 14.91        | 18.12         | 65.57       | 68.03        |
| 45            | 168.49             | 0.08        | 0.36          | 2.81       | 0.35         | 1.91          | 4.63        | 39.80          | 1.98         | 11.37        | 17.33         | 38.08       | 41.84        |
| 50            | 119.84             | 0.10        | 0.11          | 1.37       | 0.09         | 1.28          | 2.90        | 31.00          | 1.60         | 7.68         | 17.17         | 27.20       | 32.16        |
| 55            | 108.88             | 0.13        | 0.04          | 1.37       | 0.09         | 1.39          | 2.06        | 27.42          | 1.86         | 6.43         | 12.17         | 25.62       | 28.37        |
| 60            | 74.59              | 0.13        | 0.10          | 1.20       | 0.08         | 2.34          | 1.30        | 20.36          | 1.36         | 9.60         | 13.18         | 18.53       | 22.74        |
| 65            | 48.26              | 0.11        | 0.12          | 0.71       | 0.11         | 0.91          | 0.73        | 13.07          | 1.04         | 11.51        | 12.92         | 11.80       | 17.50        |
| 70            | 21.03              | 0.12        | 0.22          | 1.06       | 0.51         | 2.07          | 1.68        | 9.81           | 0.91         | 18.91        | 19.84         | 8.35        | 21.52        |
| 74            | -1.14              | 0.30        | 0.68          | 2.87       | 1.81         | 5.20          | 5.62        | 15.46          | 1.43         | 30.48        | 32.19         | 14.29       | 35.22        |
| 80            | -26.79             | 0.58        | 1.45          | 5.21       | 4.21         | 9.09          | 10.91       | 28.66          | 1.88         | 43.54        | 46.70         | 28.10       | 54.50        |
| 84            | -19.11             | 0.38        | 0.96          | 3.35       | 2.86         | 6.39          | 7.84        | 20.02          | 0.86         | 28.47        | 30.85         | 19.57       | 36.53        |

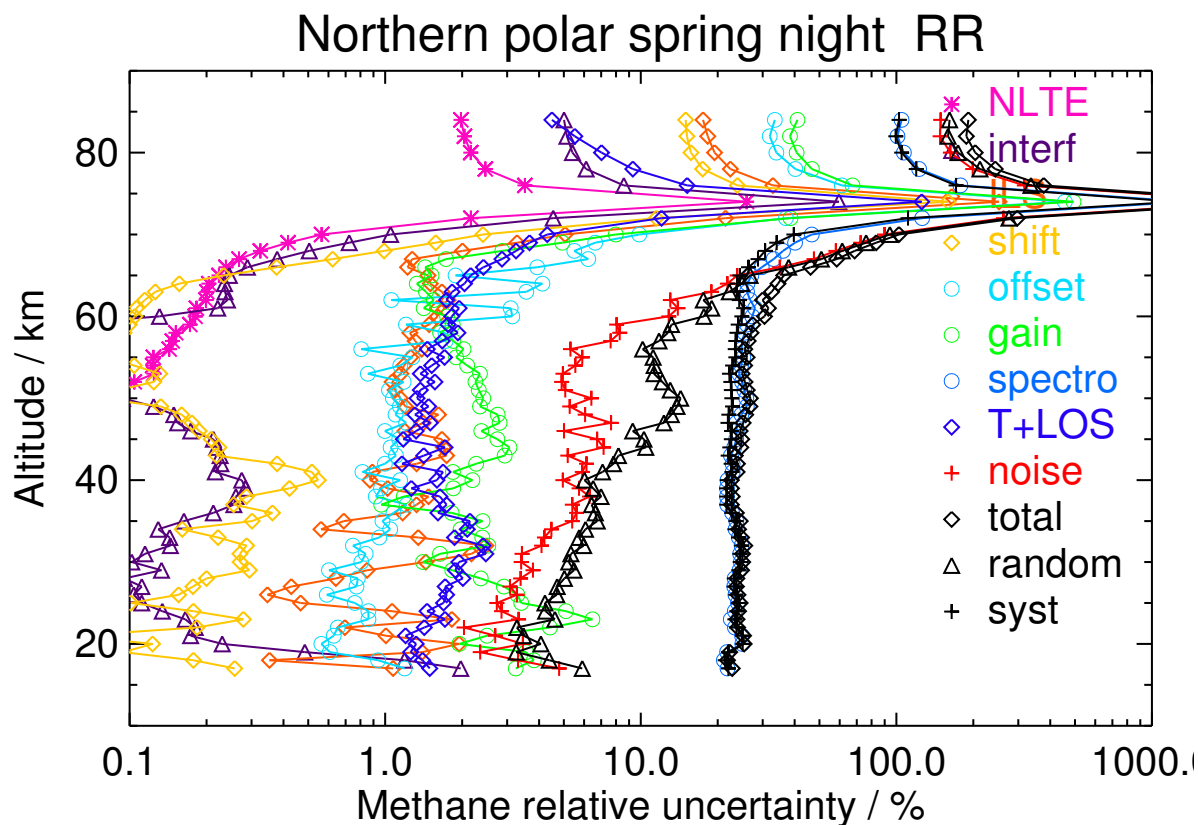

**Figure S72.** V8R\_CH4\_561 Northern polar spring night

**Table S73.** Methane error budget for Northern polar summer day. All uncertainties are  $1\sigma$ .

| altitude (km) | mean target (ppbv) | NLTE (ppbv) | interf (ppbv) | ILS (ppbv) | shift (ppbv) | offset (ppbv) | gain (ppbv) | spectro (ppbv) | T+LOS (ppbv) | noise (ppbv) | random (ppbv) | syst (ppbv) | total (ppbv) |
|---------------|--------------------|-------------|---------------|------------|--------------|---------------|-------------|----------------|--------------|--------------|---------------|-------------|--------------|
| 30            | 871.16             | 0.03        | 1.03          | 17.08      | 2.01         | 7.13          | 31.30       | 234.27         | 13.42        | 26.68        | 36.11         | 236.21      | 238.96       |
| 35            | 529.33             | 0.03        | 0.71          | 5.54       | 1.86         | 4.76          | 9.57        | 129.01         | 9.87         | 23.92        | 28.33         | 129.07      | 132.14       |
| 40            | 255.61             | 0.06        | 0.69          | 1.93       | 0.97         | 2.81          | 4.87        | 51.29          | 3.37         | 12.95        | 15.35         | 51.10       | 53.36        |
| 45            | 134.47             | 0.05        | 0.27          | 2.58       | 0.49         | 2.22          | 3.71        | 30.14          | 1.33         | 13.78        | 15.29         | 29.86       | 33.55        |
| 50            | 72.79              | 0.04        | 0.11          | 0.89       | 0.17         | 1.81          | 1.01        | 17.13          | 0.88         | 10.74        | 11.73         | 16.65       | 20.37        |
| 55            | 56.04              | 0.05        | 0.04          | 0.71       | 0.05         | 0.97          | 0.83        | 13.85          | 0.73         | 4.47         | 5.46          | 13.58       | 14.64        |
| 60            | 67.58              | 0.10        | 0.09          | 0.79       | 0.11         | 1.79          | 1.14        | 18.01          | 0.93         | 6.40         | 10.72         | 16.02       | 19.27        |
| 65            | 62.84              | 0.11        | 0.13          | 0.69       | 0.09         | 0.70          | 1.12        | 16.24          | 0.91         | 8.04         | 9.78          | 15.36       | 18.21        |
| 70            | 70.02              | 0.19        | 0.14          | 1.30       | 0.36         | 2.34          | 0.80        | 17.84          | 1.15         | 16.74        | 17.84         | 17.02       | 24.65        |
| 74            | 54.56              | 0.76        | 1.04          | 3.52       | 2.02         | 2.74          | 6.06        | 25.83          | 0.74         | 25.53        | 27.13         | 25.41       | 37.17        |
| 80            | 20.67              | 1.27        | 2.59          | 3.73       | 7.82         | 6.24          | 12.94       | 47.78          | 0.23         | 39.53        | 42.89         | 47.92       | 64.31        |
| 84            | 5.38               | 0.80        | 1.76          | 1.93       | 5.96         | 5.30          | 8.46        | 32.78          | 0.22         | 30.84        | 32.77         | 33.08       | 46.57        |

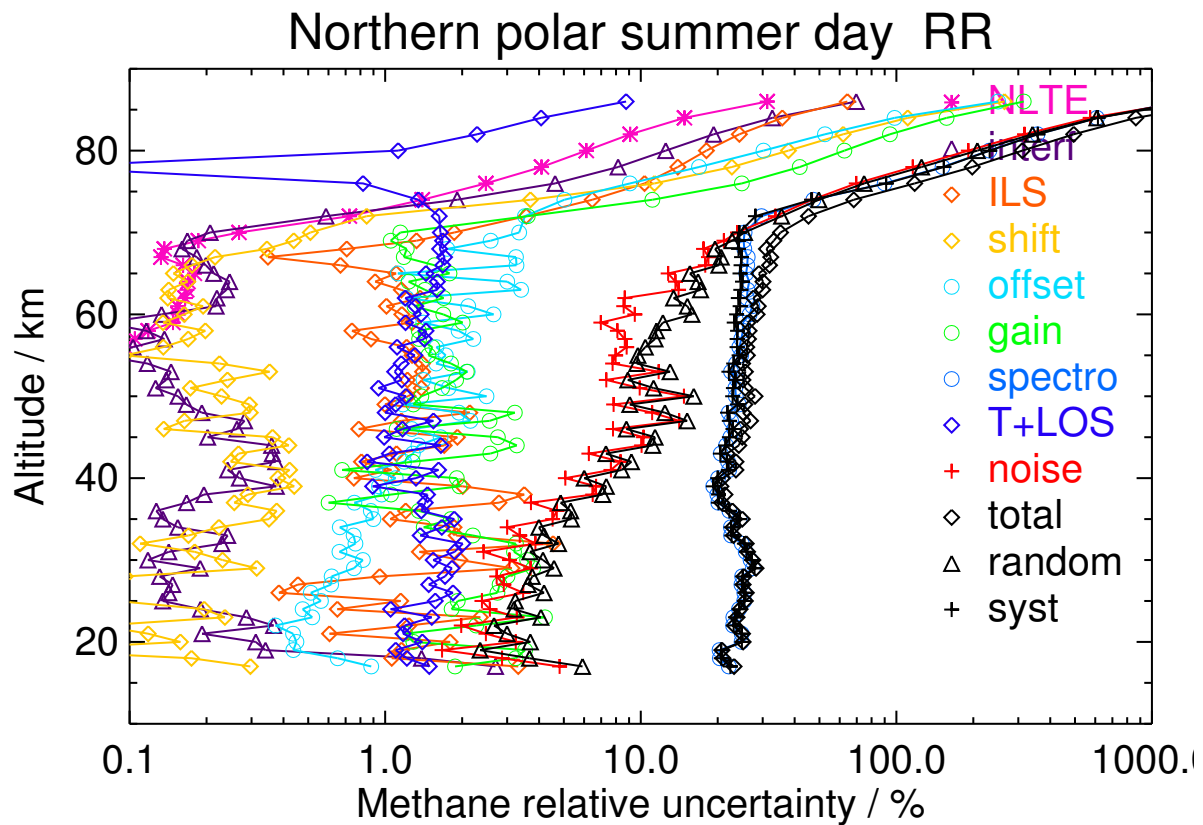

**Figure S73.** V8R\_CH4\_561 Northern polar summer day

**Table S74.** Methane error budget for Northern polar summer night. All uncertainties are  $1\sigma$ .

| altitude (km) | mean target (ppbv) | NLTE (ppbv) | interf (ppbv) | ILS (ppbv) | shift (ppbv) | offset (ppbv) | gain (ppbv) | spectro (ppbv) | T+LOS (ppbv) | noise (ppbv) | random (ppbv) | syst (ppbv) | total (ppbv) |
|---------------|--------------------|-------------|---------------|------------|--------------|---------------|-------------|----------------|--------------|--------------|---------------|-------------|--------------|
| 30            | 794.31             | 0.02        | 1.18          | 4.86       | 2.86         | 7.07          | 25.67       | 204.49         | 13.03        | 27.19        | 37.86         | 205.03      | 208.49       |
| 35            | 402.52             | 0.02        | 0.63          | 3.68       | 1.34         | 4.41          | 11.55       | 97.30          | 8.52         | 23.12        | 27.27         | 97.47       | 101.21       |
| 40            | 185.72             | 0.05        | 0.66          | 1.60       | 0.80         | 2.71          | 3.79        | 39.13          | 2.72         | 12.89        | 15.83         | 38.46       | 41.59        |
| 45            | 83.53              | 0.04        | 0.18          | 1.97       | 0.30         | 1.79          | 2.84        | 20.08          | 1.03         | 11.07        | 14.00         | 18.61       | 23.29        |
| 50            | 67.24              | 0.03        | 0.08          | 0.62       | 0.09         | 1.08          | 1.04        | 16.42          | 0.78         | 6.61         | 8.94          | 15.38       | 17.79        |
| 55            | 82.53              | 0.09        | 0.09          | 0.71       | 0.14         | 1.34          | 1.48        | 21.69          | 1.45         | 6.38         | 12.61         | 18.93       | 22.75        |
| 60            | 167.97             | 0.25        | 0.17          | 1.95       | 0.18         | 2.70          | 2.92        | 40.19          | 3.06         | 10.48        | 17.62         | 38.00       | 41.88        |
| 65            | 167.45             | 0.19        | 0.18          | 1.13       | 0.21         | 2.14          | 2.37        | 40.89          | 3.33         | 13.01        | 15.84         | 40.17       | 43.17        |
| 70            | 149.99             | 0.46        | 0.44          | 1.89       | 0.79         | 3.17          | 1.08        | 39.81          | 3.51         | 20.94        | 22.93         | 39.06       | 45.29        |
| 74            | 98.97              | 1.12        | 1.26          | 2.53       | 2.51         | 5.25          | 5.71        | 41.99          | 2.42         | 31.75        | 34.04         | 41.16       | 53.41        |
| 80            | 25.41              | 1.20        | 1.93          | 2.39       | 4.71         | 8.51          | 9.31        | 41.05          | 0.45         | 44.02        | 46.09         | 41.12       | 61.77        |
| 84            | 3.30               | 0.66        | 1.18          | 1.20       | 3.36         | 5.93          | 5.89        | 24.55          | 0.01         | 28.84        | 30.23         | 24.60       | 38.97        |

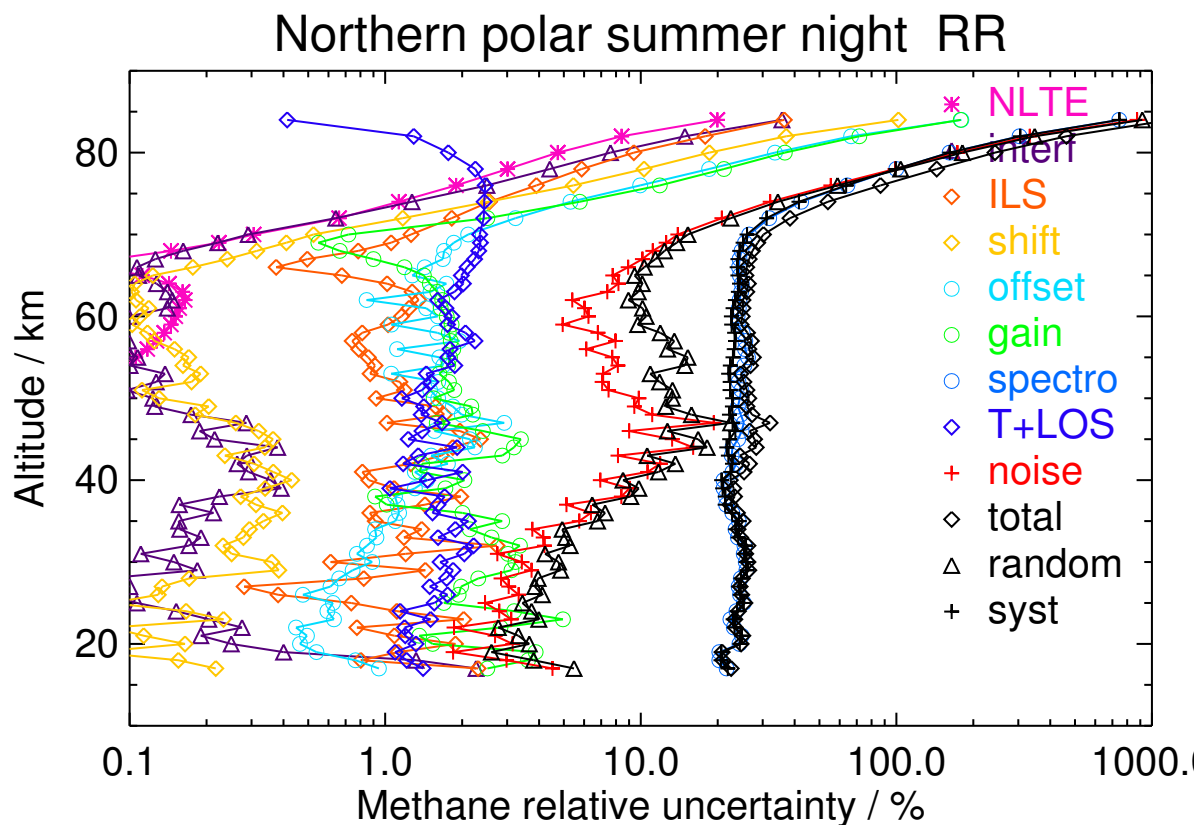

**Figure S74.** V8R\_CH4\_561 Northern polar summer night

**Table S75.** Methane error budget for Northern polar autumn day. All uncertainties are  $1\sigma$ .

| altitude (km) | mean target (ppbv) | NLTE (ppbv) | interf (ppbv) | ILS (ppbv) | shift (ppbv) | offset (ppbv) | gain (ppbv) | spectro (ppbv) | T+LOS (ppbv) | noise (ppbv) | random (ppbv) | syst (ppbv) | total (ppbv) |
|---------------|--------------------|-------------|---------------|------------|--------------|---------------|-------------|----------------|--------------|--------------|---------------|-------------|--------------|
| 30            | 643.19             | 0.04        | 1.55          | 5.86       | 1.62         | 5.71          | 12.10       | 166.66         | 12.49        | 25.77        | 53.60         | 161.06      | 169.74       |
| 35            | 240.68             | 0.04        | 1.51          | 2.67       | 0.82         | 3.57          | 11.80       | 75.36          | 7.11         | 21.96        | 51.13         | 61.31       | 79.84        |
| 40            | 131.51             | 0.10        | 0.69          | 2.56       | 0.65         | 2.83          | 3.26        | 45.01          | 2.68         | 13.38        | 38.52         | 27.47       | 47.31        |
| 45            | 115.98             | 0.14        | 0.40          | 1.24       | 0.23         | 1.63          | 3.88        | 32.88          | 2.20         | 9.62         | 23.78         | 25.15       | 34.61        |
| 50            | 184.18             | 0.32        | 0.22          | 1.11       | 0.12         | 1.52          | 4.16        | 42.32          | 3.04         | 8.29         | 13.25         | 41.41       | 43.47        |
| 55            | 214.48             | 0.53        | 0.08          | 2.21       | 0.13         | 2.21          | 4.70        | 49.66          | 4.35         | 11.07        | 13.91         | 49.46       | 51.38        |
| 60            | 182.49             | 0.57        | 0.13          | 2.42       | 0.11         | 2.72          | 3.25        | 44.14          | 3.45         | 12.49        | 15.08         | 43.74       | 46.26        |
| 65            | 103.63             | 0.41        | 0.12          | 1.37       | 0.12         | 1.32          | 1.55        | 26.80          | 2.27         | 13.81        | 15.69         | 25.96       | 30.34        |
| 70            | 47.12              | 0.24        | 0.15          | 0.45       | 0.29         | 2.50          | 0.89        | 14.44          | 1.40         | 19.60        | 20.56         | 13.40       | 24.54        |
| 74            | 13.20              | 0.47        | 0.54          | 1.40       | 0.95         | 5.70          | 4.14        | 12.15          | 1.63         | 31.69        | 33.19         | 10.30       | 34.75        |
| 80            | -6.23              | 1.01        | 1.21          | 3.28       | 2.28         | 9.40          | 9.01        | 16.84          | 2.28         | 43.63        | 46.33         | 15.27       | 48.79        |
| 84            | -19.07             | 0.54        | 0.78          | 2.39       | 0.80         | 7.05          | 9.05        | 19.83          | 1.13         | 28.73        | 34.02         | 14.20       | 36.86        |

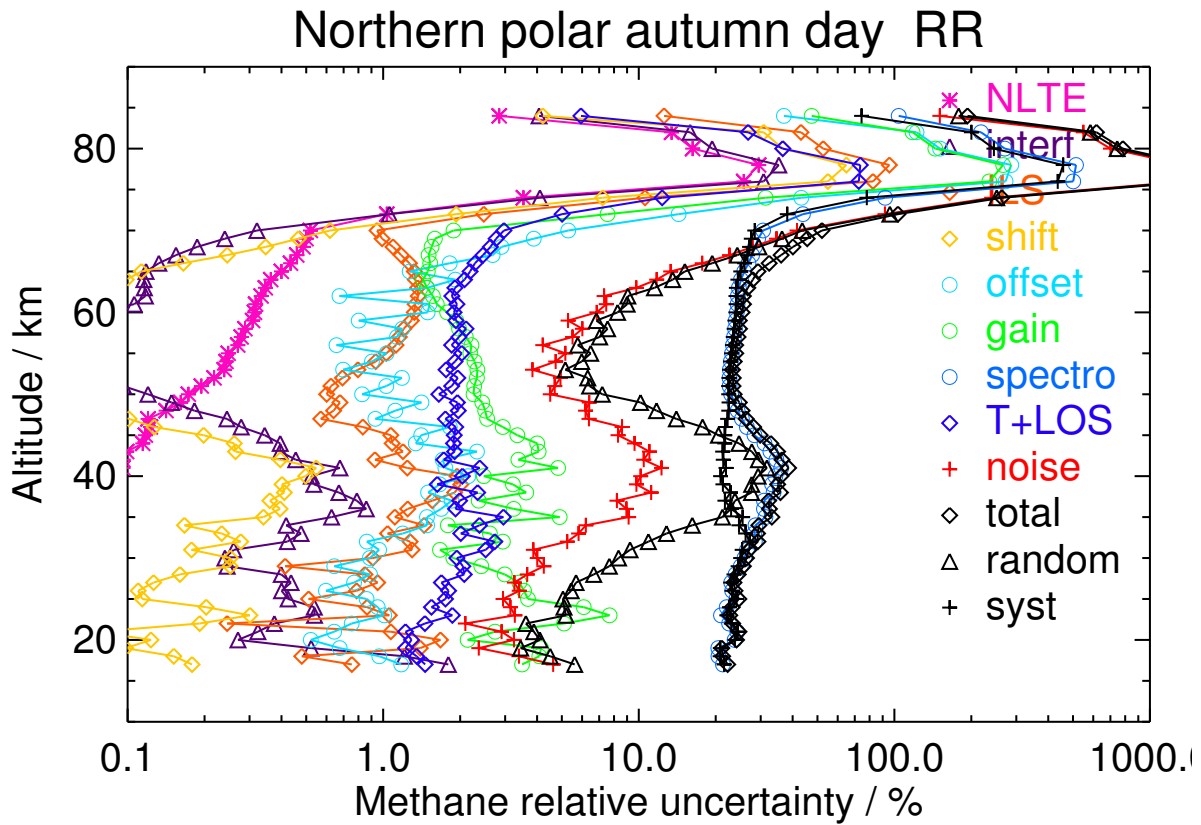

**Figure S75.** V8R\_CH4\_561 Northern polar autumn day



**Table S76.** Methane error budget for Northern polar autumn night. All uncertainties are  $1\sigma$ .

| altitude (km) | mean target (ppbv) | NLTE (ppbv) | interf (ppbv) | ILS (ppbv) | shift (ppbv) | offset (ppbv) | gain (ppbv) | spectro (ppbv) | T+LOS (ppbv) | noise (ppbv) | random (ppbv) | syst (ppbv) | total (ppbv) |
|---------------|--------------------|-------------|---------------|------------|--------------|---------------|-------------|----------------|--------------|--------------|---------------|-------------|--------------|
| 30            | 540.35             | 0.06        | 1.28          | 1.86       | 1.18         | 5.01          | 10.44       | 140.68         | 11.47        | 25.57        | 35.19         | 139.56      | 143.93       |
| 35            | 165.22             | 0.04        | 1.31          | 2.45       | 0.50         | 2.99          | 6.43        | 43.85          | 5.89         | 20.47        | 25.08         | 42.49       | 49.34        |
| 40            | 58.93              | 0.05        | 0.55          | 1.09       | 0.42         | 2.89          | 1.49        | 14.99          | 1.88         | 14.32        | 16.18         | 13.56       | 21.11        |
| 45            | 102.06             | 0.06        | 0.32          | 0.73       | 0.21         | 1.36          | 2.06        | 23.72          | 2.26         | 9.81         | 13.43         | 22.14       | 25.89        |
| 50            | 176.03             | 0.23        | 0.18          | 1.42       | 0.10         | 1.60          | 3.76        | 39.19          | 2.98         | 8.34         | 10.25         | 39.09       | 40.41        |
| 55            | 192.85             | 0.39        | 0.07          | 2.06       | 0.10         | 2.22          | 3.99        | 44.32          | 4.02         | 10.88        | 13.14         | 44.17       | 46.09        |
| 60            | 169.21             | 0.50        | 0.10          | 2.74       | 0.07         | 2.30          | 3.05        | 40.70          | 3.17         | 11.24        | 13.99         | 40.25       | 42.61        |
| 65            | 89.54              | 0.39        | 0.12          | 1.47       | 0.09         | 1.62          | 1.35        | 23.40          | 2.24         | 14.19        | 15.71         | 22.67       | 27.58        |
| 70            | 39.44              | 0.27        | 0.14          | 0.44       | 0.33         | 2.58          | 0.57        | 13.85          | 1.50         | 20.00        | 21.00         | 12.67       | 24.53        |
| 74            | 9.58               | 0.26        | 0.31          | 0.60       | 0.85         | 6.15          | 1.37        | 12.82          | 1.62         | 32.71        | 34.12         | 10.64       | 35.74        |
| 80            | -7.35              | 0.64        | 0.77          | 2.02       | 2.24         | 9.41          | 3.88        | 16.96          | 2.46         | 43.29        | 45.22         | 15.39       | 47.76        |
| 84            | 23.95              | 0.18        | 0.23          | 0.20       | 0.73         | 7.37          | 0.65        | 8.44           | 0.86         | 29.52        | 30.46         | 8.42        | 31.60        |

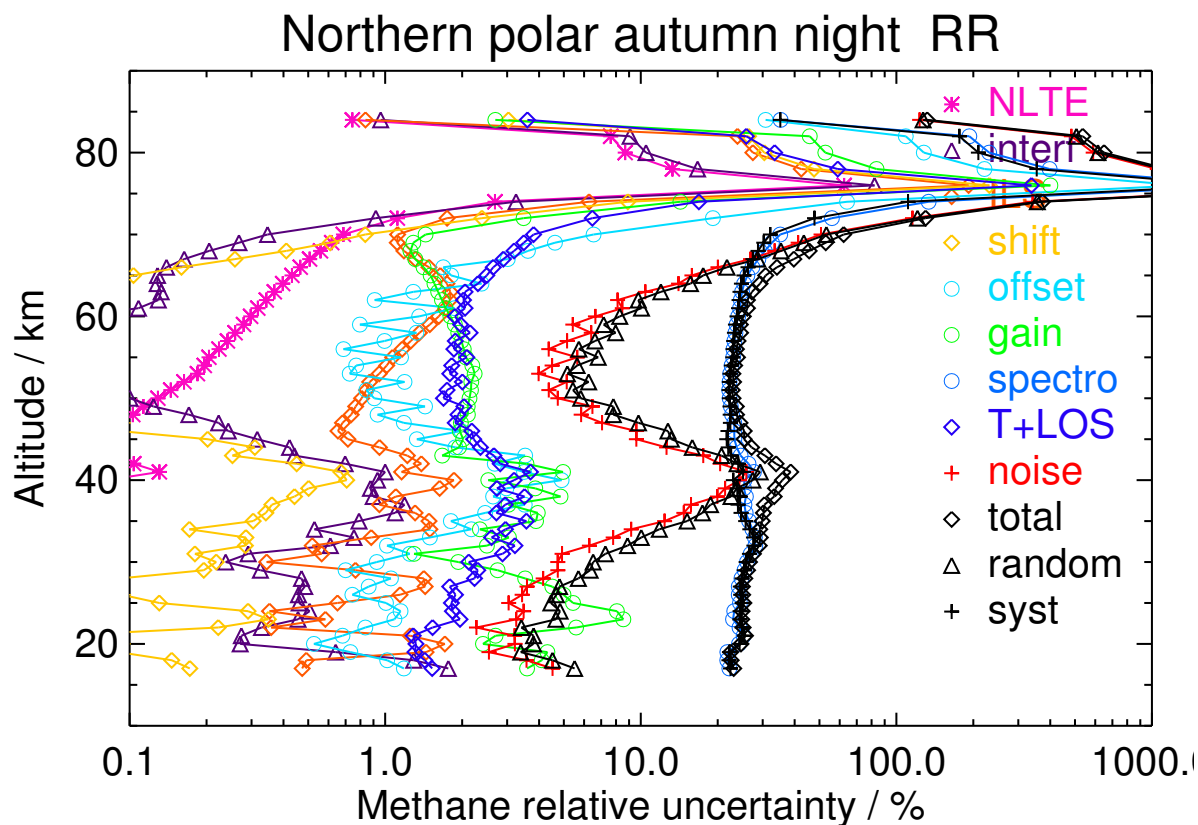

**Figure S76.** V8R\_CH4\_561 Northern polar autumn night

**Table S77.** Methane error budget for Northern midlatitude winter day. All uncertainties are  $1\sigma$ .

| altitude<br>(km) | mean target<br>(ppbv) | NLTE<br>(ppbv) | interf<br>(ppbv) | ILS<br>(ppbv) | shift<br>(ppbv) | offset<br>(ppbv) | gain<br>(ppbv) | spectro<br>(ppbv) | T+LOS<br>(ppbv) | noise<br>(ppbv) | random<br>(ppbv) | syst<br>(ppbv) | total<br>(ppbv) |
|------------------|-----------------------|----------------|------------------|---------------|-----------------|------------------|----------------|-------------------|-----------------|-----------------|------------------|----------------|-----------------|
| 30               | 916.98                | 0.06           | 5.11             | 19.77         | 1.38            | 7.21             | 29.88          | 231.56            | 16.65           | 30.15           | 69.35            | 226.63         | 237.00          |
| 35               | 577.41                | 0.11           | 2.24             | 9.29          | 1.44            | 4.40             | 11.77          | 140.97            | 9.48            | 20.16           | 42.50            | 137.16         | 143.60          |
| 40               | 357.43                | 0.14           | 1.84             | 2.78          | 1.16            | 4.66             | 5.32           | 72.61             | 5.15            | 20.17           | 26.07            | 71.33          | 75.95           |
| 45               | 295.44                | 0.28           | 1.21             | 3.18          | 0.39            | 1.82             | 6.98           | 63.42             | 3.62            | 12.24           | 18.83            | 62.41          | 65.19           |
| 50               | 177.64                | 0.32           | 0.42             | 1.39          | 0.19            | 1.58             | 4.27           | 39.60             | 3.03            | 8.78            | 12.84            | 38.89          | 40.95           |
| 55               | 154.17                | 0.35           | 0.08             | 1.47          | 0.10            | 2.14             | 3.18           | 35.90             | 3.06            | 10.17           | 11.66            | 35.82          | 37.67           |
| 60               | 125.13                | 0.31           | 0.11             | 1.53          | 0.11            | 1.99             | 1.99           | 30.58             | 2.32            | 10.70           | 12.51            | 30.15          | 32.64           |
| 65               | 66.87                 | 0.18           | 0.19             | 0.74          | 0.15            | 1.97             | 0.91           | 17.80             | 1.59            | 14.47           | 15.96            | 16.72          | 23.11           |
| 70               | 29.24                 | 0.19           | 0.55             | 0.62          | 0.43            | 2.13             | 2.31           | 10.63             | 1.25            | 19.94           | 20.77            | 9.57           | 22.87           |
| 74               | -0.50                 | 0.45           | 1.17             | 1.33          | 0.97            | 5.51             | 5.54           | 13.77             | 1.47            | 30.84           | 32.68            | 11.83          | 34.76           |
| 80               | -30.62                | 0.61           | 1.67             | 1.47          | 1.53            | 10.29            | 7.81           | 18.50             | 1.55            | 44.62           | 46.54            | 18.57          | 50.11           |
| 84               | -20.00                | 0.36           | 1.12             | 1.03          | 0.90            | 7.74             | 5.24           | 12.25             | 0.67            | 30.85           | 32.29            | 12.25          | 34.53           |

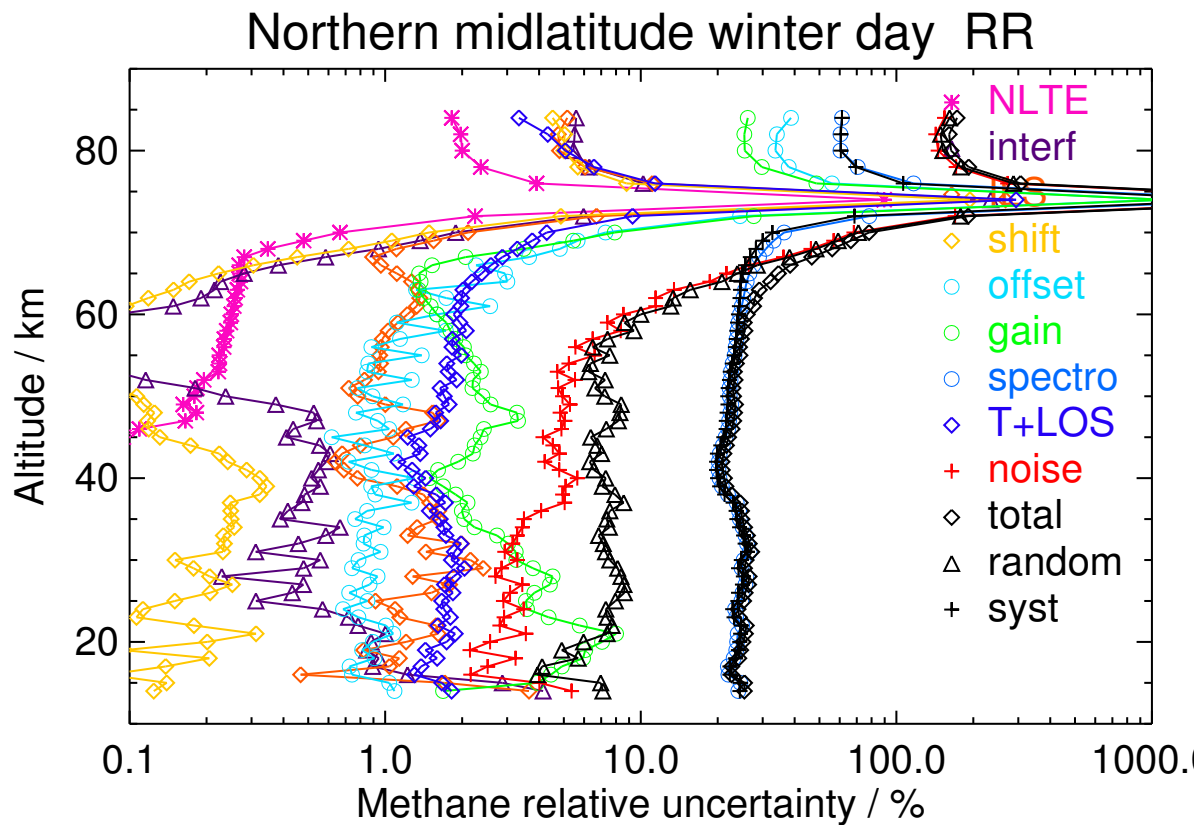**Figure S77.** V8R\_CH4\_561 Northern midlatitude winter day

**Table S78.** Methane error budget for Northern midlatitude winter night. All uncertainties are  $1\sigma$ .

| altitude (km) | mean target (ppbv) | NLTE (ppbv) | interf (ppbv) | ILS (ppbv) | shift (ppbv) | offset (ppbv) | gain (ppbv) | spectro (ppbv) | T+LOS (ppbv) | noise (ppbv) | random (ppbv) | syst (ppbv) | total (ppbv) |
|---------------|--------------------|-------------|---------------|------------|--------------|---------------|-------------|----------------|--------------|--------------|---------------|-------------|--------------|
| 30            | 981.05             | 0.04        | 3.37          | 22.95      | 3.00         | 8.85          | 53.60       | 243.28         | 20.27        | 28.37        | 76.51         | 240.93      | 252.79       |
| 35            | 569.50             | 0.04        | 2.32          | 5.44       | 1.63         | 5.31          | 12.37       | 137.27         | 9.79         | 21.73        | 43.18         | 133.28      | 140.10       |
| 40            | 383.49             | 0.11        | 2.19          | 3.11       | 1.23         | 3.78          | 9.94        | 86.63          | 5.53         | 18.94        | 26.10         | 85.69       | 89.58        |
| 45            | 331.68             | 0.19        | 1.30          | 4.17       | 0.48         | 2.42          | 11.22       | 79.01          | 4.74         | 12.76        | 24.51         | 77.32       | 81.11        |
| 50            | 200.62             | 0.17        | 0.33          | 2.31       | 0.20         | 2.04          | 5.10        | 46.52          | 3.56         | 9.59         | 15.23         | 45.53       | 48.01        |
| 55            | 160.79             | 0.21        | 0.11          | 1.66       | 0.11         | 1.62          | 3.57        | 37.52          | 3.17         | 9.52         | 11.65         | 37.30       | 39.07        |
| 60            | 130.12             | 0.19        | 0.10          | 1.55       | 0.13         | 1.82          | 2.16        | 32.10          | 2.94         | 11.76        | 13.81         | 31.58       | 34.46        |
| 65            | 72.90              | 0.14        | 0.21          | 0.93       | 0.24         | 1.87          | 0.91        | 19.67          | 1.99         | 15.85        | 17.22         | 18.74       | 25.44        |
| 70            | 33.32              | 0.17        | 0.29          | 0.54       | 0.44         | 2.52          | 1.97        | 13.28          | 1.53         | 20.53        | 21.94         | 11.38       | 24.72        |
| 74            | 10.58              | 0.29        | 0.71          | 1.06       | 1.06         | 5.96          | 4.48        | 14.67          | 1.65         | 31.59        | 33.65         | 11.90       | 35.69        |
| 80            | -16.44             | 0.44        | 1.39          | 2.04       | 1.77         | 10.49         | 9.25        | 22.75          | 1.95         | 44.77        | 47.91         | 20.88       | 52.26        |
| 84            | -17.28             | 0.26        | 0.90          | 1.30       | 1.11         | 7.51          | 5.84        | 14.50          | 0.78         | 29.83        | 31.94         | 13.22       | 34.57        |

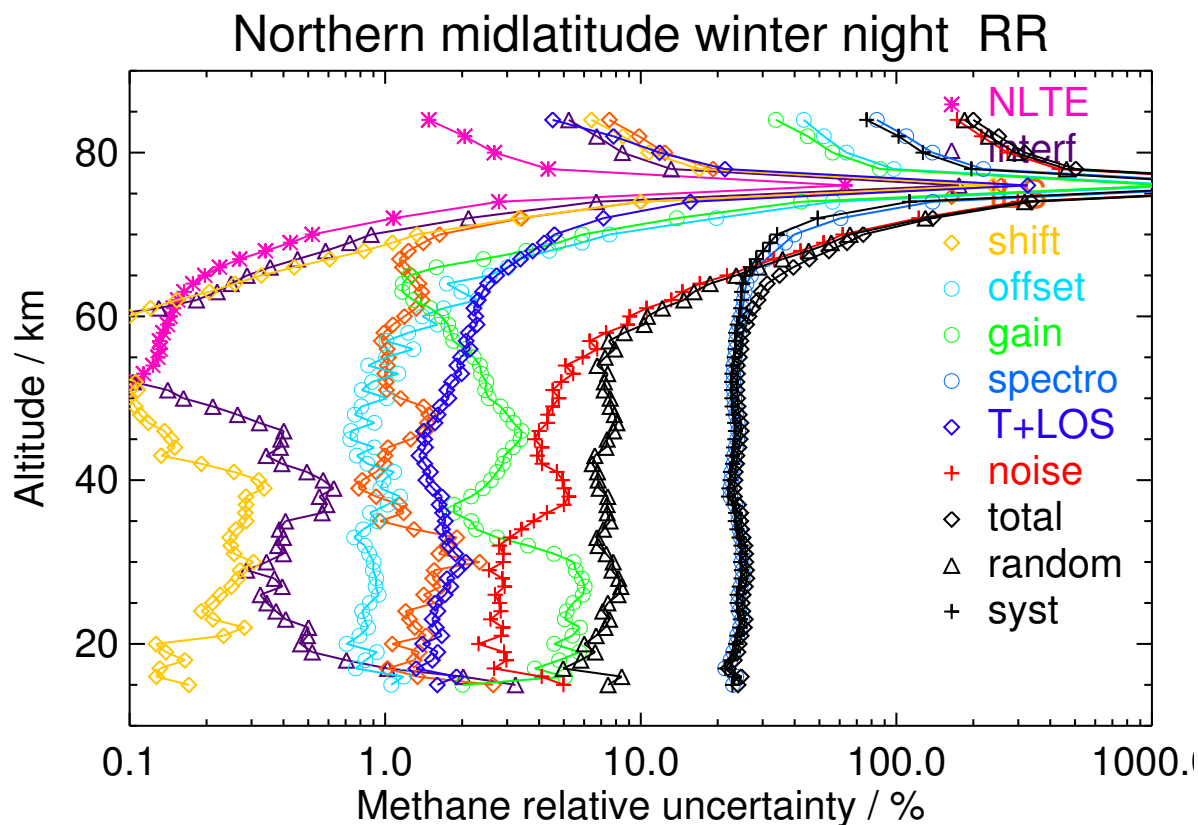

**Figure S78.** V8R\_CH4\_561 Northern midlatitude winter night

**Table S79.** Methane error budget for Northern midlatitude spring day. All uncertainties are  $1\sigma$ .

| altitude<br>(km) | mean target<br>(ppbv) | NLTE<br>(ppbv) | interf<br>(ppbv) | ILS<br>(ppbv) | shift<br>(ppbv) | offset<br>(ppbv) | gain<br>(ppbv) | spectro<br>(ppbv) | T+LOS<br>(ppbv) | noise<br>(ppbv) | random<br>(ppbv) | syst<br>(ppbv) | total<br>(ppbv) |
|------------------|-----------------------|----------------|------------------|---------------|-----------------|------------------|----------------|-------------------|-----------------|-----------------|------------------|----------------|-----------------|
| 30               | 962.44                | 0.05           | 2.06             | 9.16          | 2.73            | 7.39             | 21.00          | 249.89            | 17.10           | 25.79           | 52.09            | 247.55         | 252.97          |
| 35               | 567.37                | 0.12           | 2.37             | 3.14          | 1.88            | 4.49             | 10.85          | 137.80            | 10.08           | 22.35           | 45.59            | 132.92         | 140.52          |
| 40               | 405.84                | 0.17           | 1.79             | 4.86          | 1.43            | 3.09             | 7.73           | 85.86             | 5.22            | 14.17           | 31.54            | 81.87          | 87.74           |
| 45               | 305.20                | 0.27           | 1.32             | 1.93          | 0.57            | 2.50             | 7.48           | 69.31             | 3.66            | 11.34           | 26.08            | 65.83          | 70.80           |
| 50               | 249.45                | 0.39           | 0.59             | 2.58          | 0.24            | 1.53             | 6.47           | 56.27             | 3.47            | 8.59            | 17.35            | 54.80          | 57.48           |
| 55               | 194.75                | 0.38           | 0.10             | 2.30          | 0.17            | 1.48             | 4.26           | 44.90             | 3.49            | 7.51            | 12.78            | 44.12          | 45.94           |
| 60               | 140.97                | 0.29           | 0.11             | 1.61          | 0.12            | 2.74             | 2.18           | 34.10             | 2.79            | 11.40           | 13.46            | 33.68          | 36.27           |
| 65               | 79.27                 | 0.14           | 0.16             | 0.62          | 0.13            | 1.00             | 0.89           | 20.37             | 1.66            | 12.30           | 13.50            | 19.72          | 23.90           |
| 70               | 33.67                 | 0.18           | 0.33             | 1.07          | 0.30            | 2.02             | 2.08           | 11.57             | 1.20            | 18.48           | 19.38            | 10.54          | 22.06           |
| 74               | -7.79                 | 0.75           | 1.45             | 4.08          | 1.61            | 4.94             | 10.07          | 22.09             | 2.15            | 29.39           | 31.95            | 21.98          | 38.78           |
| 80               | -36.65                | 1.62           | 3.21             | 7.82          | 4.52            | 9.32             | 22.29          | 47.08             | 3.45            | 42.85           | 47.40            | 49.95          | 68.87           |
| 84               | -24.80                | 0.98           | 1.97             | 4.54          | 2.80            | 6.67             | 13.42          | 28.82             | 1.40            | 28.80           | 31.33            | 30.64          | 43.82           |

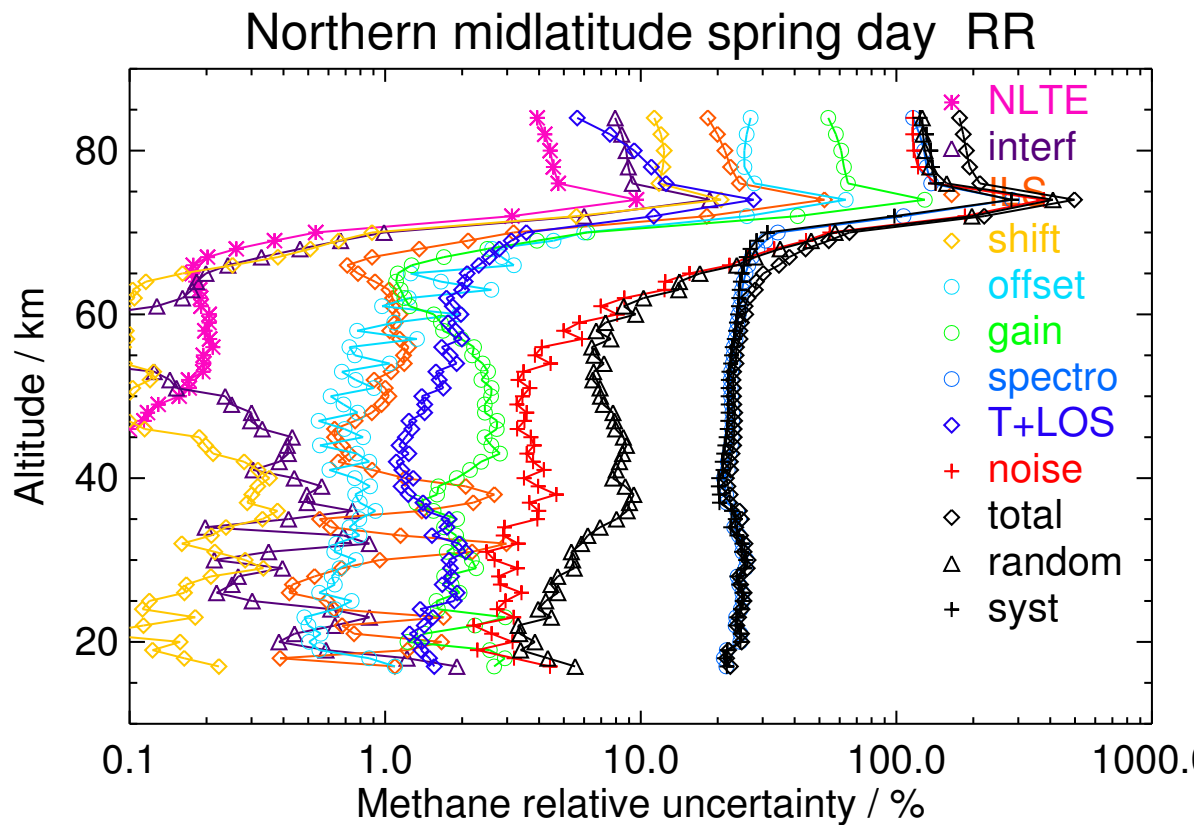**Figure S79.** V8R\_CH4\_561 Northern midlatitude spring day

**Table S80.** Methane error budget for Northern midlatitude spring night. All uncertainties are  $1\sigma$ .

| altitude (km) | mean target (ppbv) | NLTE (ppbv) | interf (ppbv) | ILS (ppbv) | shift (ppbv) | offset (ppbv) | gain (ppbv) | spectro (ppbv) | T+LOS (ppbv) | noise (ppbv) | random (ppbv) | syst (ppbv) | total (ppbv) |
|---------------|--------------------|-------------|---------------|------------|--------------|---------------|-------------|----------------|--------------|--------------|---------------|-------------|--------------|
| 30            | 965.86             | 0.01        | 2.19          | 8.07       | 2.59         | 6.42          | 14.33       | 243.37         | 16.72        | 26.42        | 47.17         | 241.46      | 246.03       |
| 35            | 537.85             | 0.04        | 1.66          | 3.34       | 1.60         | 4.27          | 8.64        | 131.71         | 10.38        | 22.31        | 42.55         | 127.48      | 134.40       |
| 40            | 378.14             | 0.07        | 2.30          | 3.55       | 1.60         | 3.39          | 7.92        | 82.27          | 5.35         | 14.73        | 30.45         | 78.62       | 84.31        |
| 45            | 226.41             | 0.09        | 1.31          | 2.25       | 0.50         | 1.94          | 5.99        | 54.19          | 2.69         | 10.06        | 25.75         | 49.27       | 55.60        |
| 50            | 201.99             | 0.16        | 0.48          | 2.41       | 0.16         | 1.45          | 5.21        | 47.06          | 2.78         | 8.33         | 19.70         | 44.04       | 48.24        |
| 55            | 161.73             | 0.18        | 0.08          | 1.93       | 0.14         | 1.56          | 3.38        | 38.53          | 2.99         | 7.62         | 14.51         | 36.87       | 39.62        |
| 60            | 121.02             | 0.17        | 0.12          | 1.69       | 0.09         | 2.65          | 1.99        | 29.83          | 2.33         | 11.02        | 14.16         | 28.81       | 32.11        |
| 65            | 64.13              | 0.11        | 0.14          | 0.84       | 0.12         | 0.91          | 1.04        | 16.62          | 1.48         | 12.12        | 13.28         | 15.86       | 20.68        |
| 70            | 29.83              | 0.13        | 0.36          | 1.10       | 0.40         | 2.14          | 2.07        | 11.57          | 1.20         | 18.92        | 19.76         | 10.62       | 22.44        |
| 74            | 3.66               | 0.41        | 1.31          | 3.46       | 1.86         | 5.06          | 7.92        | 20.95          | 2.20         | 30.35        | 32.30         | 20.66       | 38.35        |
| 80            | -17.90             | 0.78        | 2.48          | 5.99       | 4.31         | 9.02          | 14.64       | 36.79          | 2.75         | 43.56        | 46.81         | 37.75       | 60.13        |
| 84            | -20.34             | 0.48        | 1.59          | 3.54       | 2.84         | 6.42          | 9.32        | 23.74          | 1.16         | 28.66        | 30.72         | 24.37       | 39.21        |

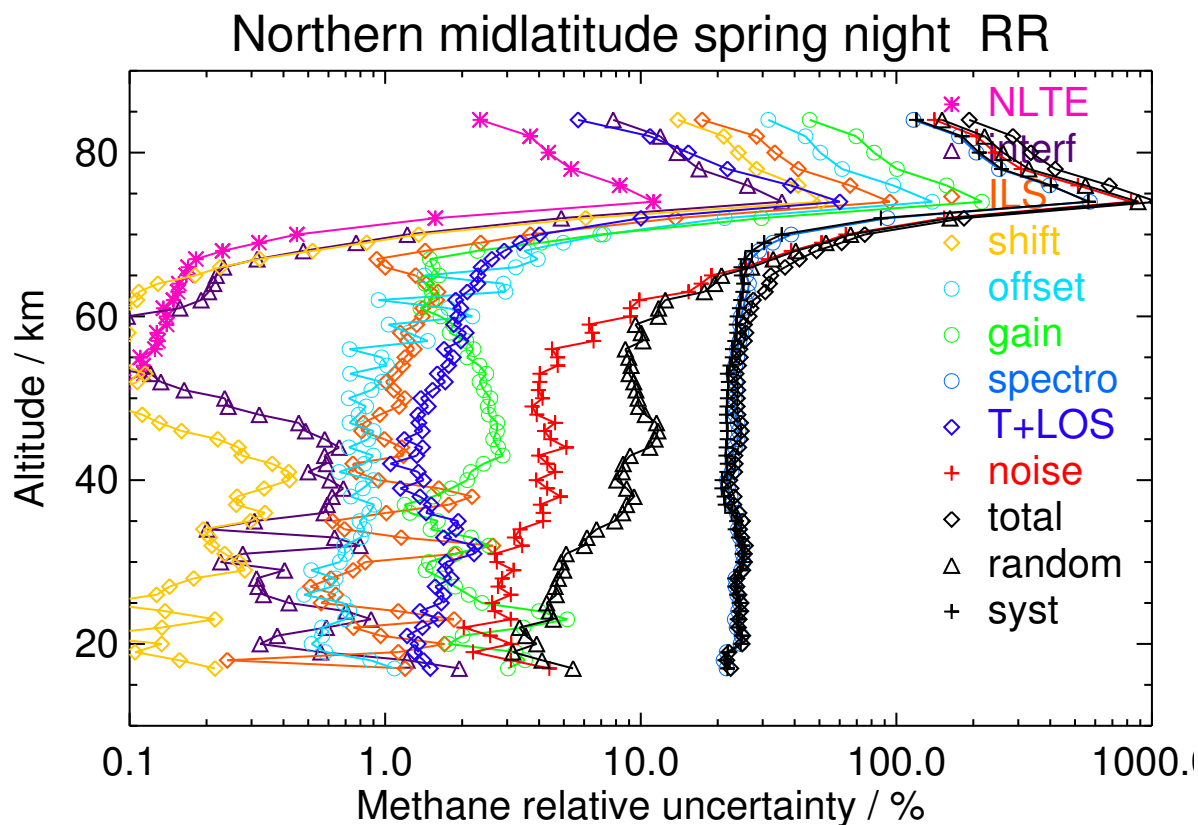

**Figure S80.** V8R\_CH4\_561 Northern midlatitude spring night

**Table S81.** Methane error budget for Northern midlatitude summer day. All uncertainties are  $1\sigma$ .

| altitude<br>(km) | mean target<br>(ppbv) | NLTE<br>(ppbv) | interf<br>(ppbv) | ILS<br>(ppbv) | shift<br>(ppbv) | offset<br>(ppbv) | gain<br>(ppbv) | spectro<br>(ppbv) | T+LOS<br>(ppbv) | noise<br>(ppbv) | random<br>(ppbv) | syst<br>(ppbv) | total<br>(ppbv) |
|------------------|-----------------------|----------------|------------------|---------------|-----------------|------------------|----------------|-------------------|-----------------|-----------------|------------------|----------------|-----------------|
| 30               | 901.12                | 0.02           | 2.64             | 6.13          | 2.28            | 7.35             | 29.48          | 230.19            | 14.41           | 25.45           | 37.47            | 231.12         | 234.13          |
| 35               | 541.88                | 0.06           | 3.21             | 4.47          | 2.01            | 5.02             | 11.79          | 131.13            | 10.41           | 23.95           | 32.20            | 130.54         | 134.45          |
| 40               | 271.13                | 0.09           | 1.33             | 1.83          | 0.79            | 2.50             | 4.86           | 55.18             | 3.73            | 11.27           | 16.75            | 54.23          | 56.76           |
| 45               | 167.49                | 0.09           | 0.92             | 1.43          | 0.35            | 1.75             | 3.40           | 38.40             | 1.65            | 9.26            | 16.43            | 36.21          | 39.76           |
| 50               | 110.98                | 0.12           | 0.59             | 1.47          | 0.15            | 1.18             | 2.36           | 27.80             | 1.67            | 8.20            | 15.61            | 24.68          | 29.20           |
| 55               | 176.58                | 0.28           | 0.38             | 1.18          | 0.29            | 1.42             | 3.35           | 44.48             | 2.80            | 6.54            | 21.62            | 39.71          | 45.21           |
| 60               | 204.76                | 0.40           | 0.25             | 1.84          | 0.31            | 2.85             | 3.57           | 50.85             | 3.69            | 11.16           | 22.93            | 47.15          | 52.43           |
| 65               | 142.97                | 0.24           | 0.26             | 0.64          | 0.23            | 1.60             | 1.57           | 36.29             | 2.52            | 12.12           | 16.45            | 34.72          | 38.42           |
| 70               | 127.08                | 0.59           | 0.58             | 1.93          | 0.52            | 2.59             | 1.66           | 32.22             | 2.33            | 19.14           | 21.72            | 30.85          | 37.73           |
| 74               | 90.31                 | 1.60           | 1.41             | 2.14          | 1.76            | 4.21             | 6.55           | 31.22             | 1.73            | 28.83           | 31.25            | 30.08          | 43.38           |
| 80               | 61.63                 | 2.48           | 2.33             | 2.85          | 4.39            | 8.21             | 11.81          | 36.01             | 0.30            | 42.61           | 45.86            | 35.41          | 57.95           |
| 84               | 26.75                 | 1.45           | 1.51             | 1.77          | 3.13            | 6.10             | 7.54           | 22.66             | 0.09            | 28.87           | 30.95            | 22.38          | 38.19           |

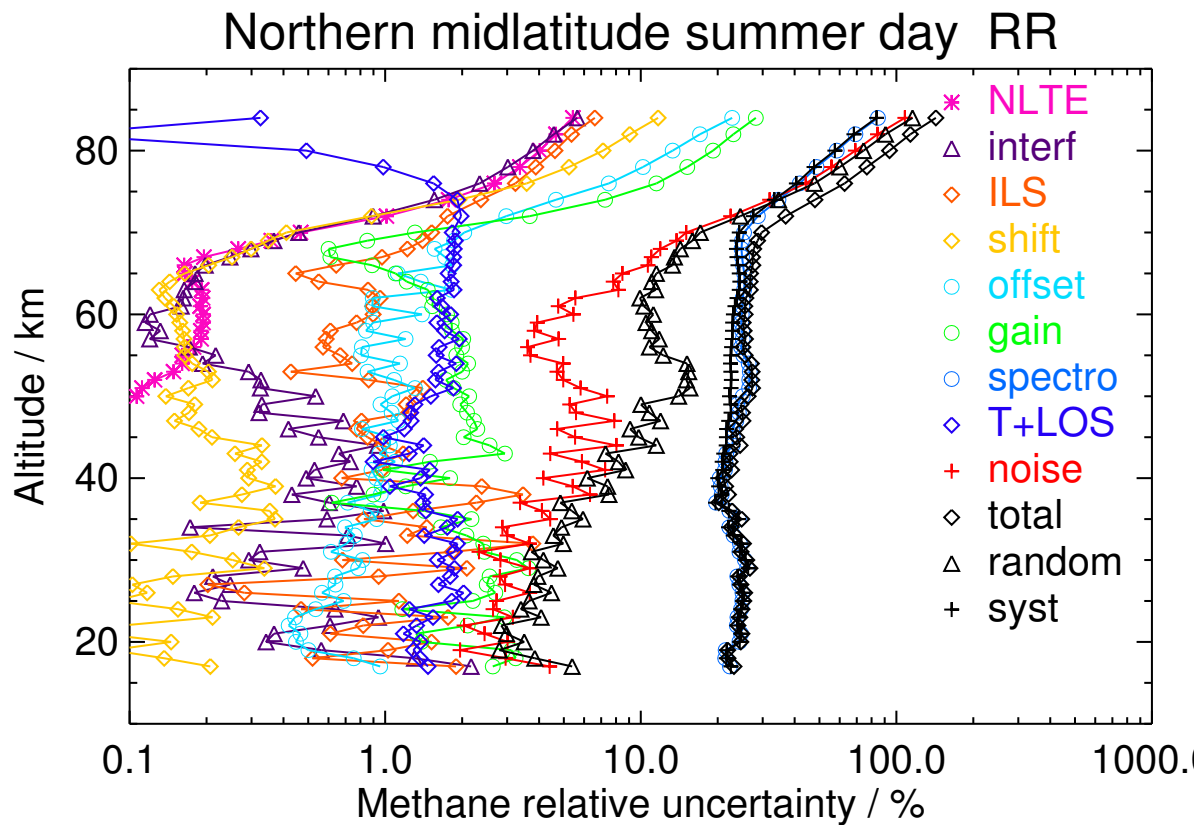**Figure S81.** V8R\_CH4\_561 Northern midlatitude summer day

**Table S82.** Methane error budget for Northern midlatitude summer night. All uncertainties are  $1\sigma$ .

| altitude (km) | mean target (ppbv) | NLTE (ppbv) | interf (ppbv) | ILS (ppbv) | shift (ppbv) | offset (ppbv) | gain (ppbv) | spectro (ppbv) | T+LOS (ppbv) | noise (ppbv) | random (ppbv) | syst (ppbv) | total (ppbv) |
|---------------|--------------------|-------------|---------------|------------|--------------|---------------|-------------|----------------|--------------|--------------|---------------|-------------|--------------|
| 30            | 946.10             | 0.03        | 4.38          | 8.84       | 2.14         | 6.49          | 19.54       | 250.78         | 14.30        | 26.03        | 39.82         | 250.43      | 253.57       |
| 35            | 572.84             | 0.02        | 2.67          | 4.46       | 2.07         | 4.49          | 5.63        | 137.23         | 10.36        | 23.28        | 32.85         | 135.96      | 139.88       |
| 40            | 279.96             | 0.04        | 1.75          | 1.98       | 0.93         | 2.63          | 5.21        | 58.84          | 3.89         | 11.72        | 20.64         | 56.83       | 60.47        |
| 45            | 175.64             | 0.06        | 1.08          | 1.82       | 0.47         | 1.80          | 4.34        | 42.10          | 1.75         | 10.02        | 20.68         | 38.41       | 43.62        |
| 50            | 116.75             | 0.07        | 0.54          | 1.33       | 0.21         | 1.12          | 2.36        | 28.85          | 1.67         | 7.59         | 16.28         | 25.23       | 30.02        |
| 55            | 189.99             | 0.17        | 0.39          | 1.24       | 0.32         | 1.69          | 3.83        | 46.64          | 3.40         | 7.27         | 22.78         | 41.71       | 47.53        |
| 60            | 197.59             | 0.17        | 0.22          | 2.26       | 0.31         | 2.70          | 3.59        | 49.14          | 3.68         | 10.47        | 21.10         | 46.02       | 50.63        |
| 65            | 137.93             | 0.16        | 0.18          | 0.71       | 0.21         | 1.59          | 1.83        | 35.01          | 2.87         | 12.29        | 16.00         | 33.70       | 37.31        |
| 70            | 102.61             | 0.79        | 0.67          | 2.32       | 0.54         | 2.34          | 2.75        | 30.85          | 2.67         | 20.16        | 22.13         | 29.92       | 37.21        |
| 74            | 66.88              | 1.45        | 2.30          | 3.39       | 3.61         | 4.32          | 10.54       | 40.45          | 2.36         | 28.71        | 32.03         | 40.02       | 51.26        |
| 80            | 29.11              | 1.62        | 2.78          | 3.69       | 6.12         | 8.17          | 10.87       | 39.67          | 0.52         | 43.18        | 46.25         | 39.32       | 60.70        |
| 84            | 8.21               | 0.83        | 1.65          | 2.62       | 3.96         | 5.96          | 5.97        | 22.64          | 0.02         | 28.87        | 30.53         | 22.60       | 37.99        |

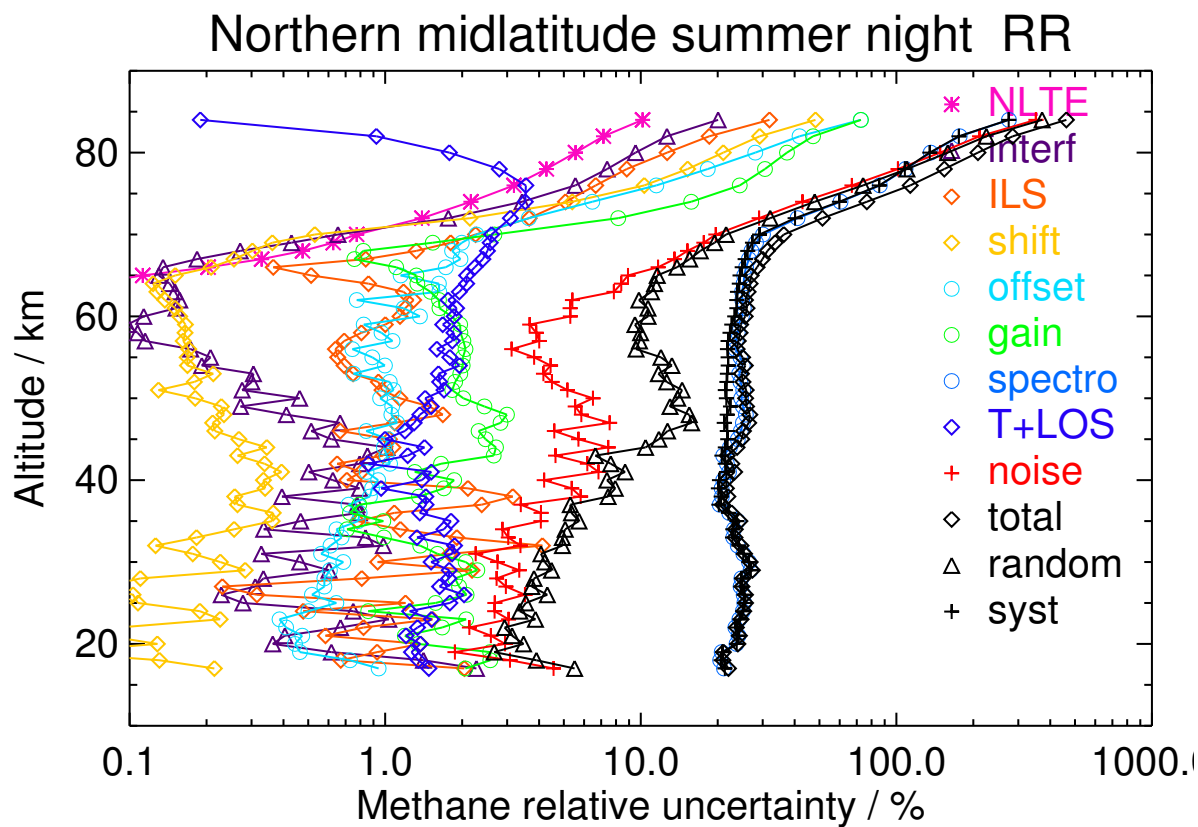

**Figure S82.** V8R\_CH4\_561 Northern midlatitude summer night



**Table S83.** Methane error budget for Northern midlatitude autumn day. All uncertainties are  $1\sigma$ .

| altitude (km) | mean target (ppbv) | NLTE (ppbv) | interf (ppbv) | ILS (ppbv) | shift (ppbv) | offset (ppbv) | gain (ppbv) | spectro (ppbv) | T+LOS (ppbv) | noise (ppbv) | random (ppbv) | syst (ppbv) | total (ppbv) |
|---------------|--------------------|-------------|---------------|------------|--------------|---------------|-------------|----------------|--------------|--------------|---------------|-------------|--------------|
| 30            | 888.59             | 0.03        | 3.54          | 7.84       | 2.49         | 6.95          | 22.14       | 229.69         | 16.12        | 26.79        | 63.31         | 224.38      | 233.14       |
| 35            | 660.85             | 0.14        | 6.26          | 4.95       | 1.32         | 4.23          | 11.30       | 167.29         | 10.38        | 21.75        | 64.81         | 156.77      | 169.64       |
| 40            | 515.19             | 0.22        | 2.26          | 8.01       | 1.66         | 4.29          | 8.11        | 116.40         | 7.02         | 19.65        | 58.39         | 103.59      | 118.91       |
| 45            | 353.37             | 0.31        | 1.46          | 1.93       | 0.75         | 2.64          | 8.70        | 78.83          | 4.53         | 13.59        | 34.19         | 73.07       | 80.67        |
| 50            | 301.62             | 0.47        | 0.72          | 1.78       | 0.17         | 1.85          | 6.88        | 66.34          | 4.59         | 10.09        | 20.83         | 64.38       | 67.67        |
| 55            | 280.28             | 0.62        | 0.21          | 2.23       | 0.24         | 2.38          | 6.10        | 62.54          | 5.75         | 11.76        | 16.22         | 62.19       | 64.27        |
| 60            | 246.56             | 0.61        | 0.19          | 2.70       | 0.20         | 3.26          | 4.31        | 57.76          | 5.18         | 14.04        | 16.58         | 57.64       | 59.98        |
| 65            | 161.90             | 0.35        | 0.23          | 1.18       | 0.19         | 1.50          | 1.72        | 39.81          | 3.57         | 14.26        | 16.20         | 39.31       | 42.52        |
| 70            | 89.43              | 0.42        | 0.40          | 0.84       | 0.37         | 2.68          | 2.11        | 25.25          | 2.60         | 19.66        | 21.48         | 24.13       | 32.31        |
| 74            | 51.05              | 1.22        | 3.92          | 2.34       | 1.52         | 5.53          | 8.66        | 24.59          | 3.56         | 31.84        | 34.43         | 24.00       | 41.97        |
| 80            | 14.80              | 1.97        | 12.14         | 4.92       | 3.02         | 9.92          | 16.48       | 33.07          | 4.12         | 43.74        | 49.00         | 34.30       | 59.81        |
| 84            | 1.79               | 1.04        | 1.11          | 2.24       | 1.58         | 7.17          | 8.77        | 19.00          | 1.66         | 29.11        | 31.06         | 19.62       | 36.74        |

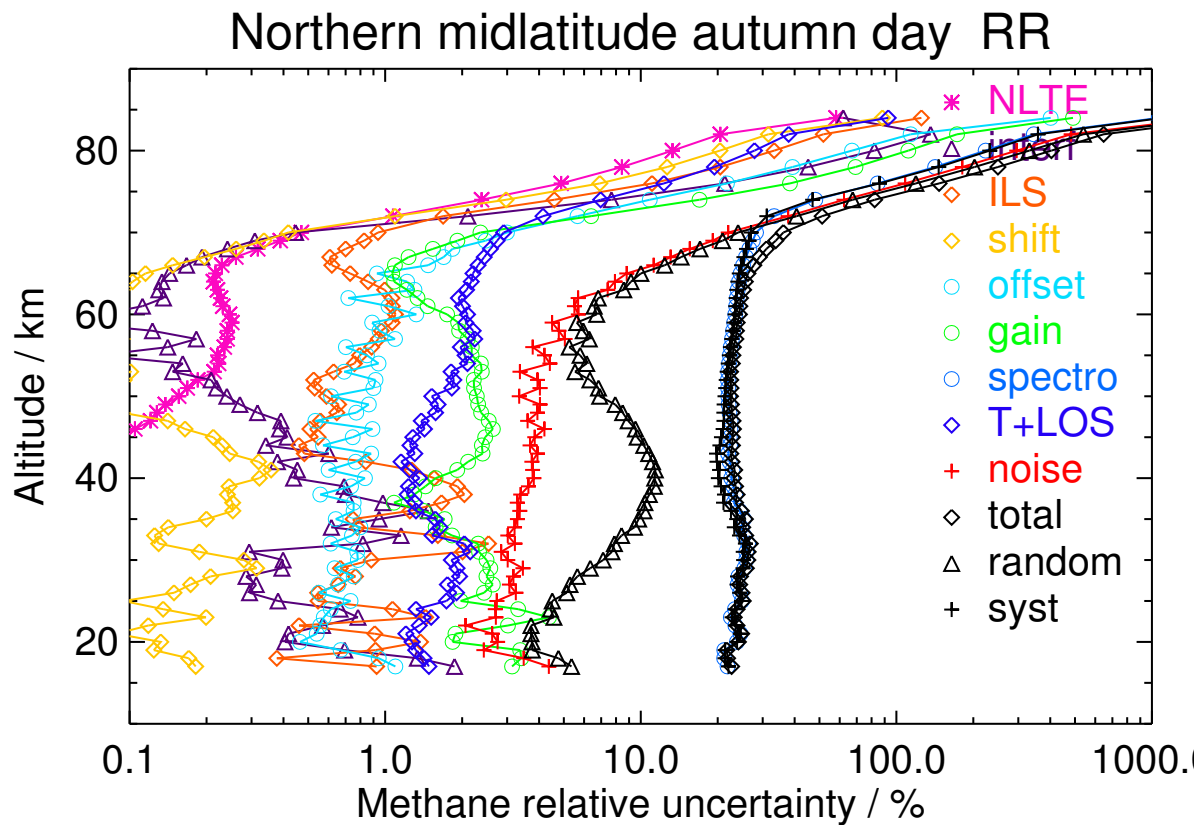

**Figure S83.** V8R\_CH4\_561 Northern midlatitude autumn day

**Table S84.** Methane error budget for Northern midlatitude autumn night. All uncertainties are  $1\sigma$ .

| altitude (km) | mean target (ppbv) | NLTE (ppbv) | interf (ppbv) | ILS (ppbv) | shift (ppbv) | offset (ppbv) | gain (ppbv) | spectro (ppbv) | T+LOS (ppbv) | noise (ppbv) | random (ppbv) | syst (ppbv) | total (ppbv) |
|---------------|--------------------|-------------|---------------|------------|--------------|---------------|-------------|----------------|--------------|--------------|---------------|-------------|--------------|
| 30            | 944.65             | 0.03        | 1.93          | 9.03       | 2.41         | 6.60          | 20.02       | 236.72         | 15.98        | 26.28        | 54.09         | 233.65      | 239.83       |
| 35            | 765.93             | 0.05        | 2.47          | 4.98       | 1.61         | 4.67          | 14.32       | 187.95         | 12.13        | 22.03        | 57.19         | 181.52      | 190.31       |
| 40            | 533.99             | 0.12        | 1.81          | 4.86       | 1.53         | 4.71          | 8.78        | 122.11         | 7.89         | 21.29        | 51.79         | 113.46      | 124.72       |
| 45            | 360.48             | 0.17        | 1.18          | 3.45       | 0.46         | 2.73          | 11.44       | 84.68          | 5.16         | 14.35        | 33.26         | 80.31       | 86.92        |
| 50            | 316.43             | 0.26        | 0.63          | 2.52       | 0.25         | 2.24          | 7.98        | 70.81          | 5.36         | 11.39        | 20.26         | 69.55       | 72.44        |
| 55            | 287.66             | 0.37        | 0.21          | 2.66       | 0.23         | 2.65          | 6.57        | 63.92          | 6.57         | 13.33        | 16.85         | 63.87       | 66.06        |
| 60            | 248.55             | 0.38        | 0.19          | 3.21       | 0.18         | 3.19          | 4.50        | 57.68          | 5.67         | 14.48        | 16.71         | 57.70       | 60.08        |
| 65            | 164.11             | 0.27        | 0.25          | 1.87       | 0.21         | 1.89          | 1.89        | 40.21          | 4.14         | 15.64        | 17.81         | 39.65       | 43.47        |
| 70            | 92.73              | 0.43        | 0.53          | 1.16       | 0.54         | 3.07          | 3.64        | 27.39          | 3.39         | 21.51        | 24.21         | 25.75       | 35.34        |
| 74            | 39.40              | 0.72        | 1.09          | 2.52       | 1.21         | 6.35          | 8.30        | 25.72          | 3.81         | 33.65        | 36.42         | 24.50       | 43.89        |
| 80            | -6.42              | 1.00        | 1.82          | 4.94       | 2.48         | 10.28         | 14.61       | 32.18          | 3.91         | 43.99        | 48.79         | 30.98       | 57.80        |
| 84            | -6.35              | 0.43        | 0.81          | 1.80       | 1.08         | 7.40          | 6.27        | 15.14          | 1.28         | 28.99        | 31.00         | 14.48       | 34.22        |

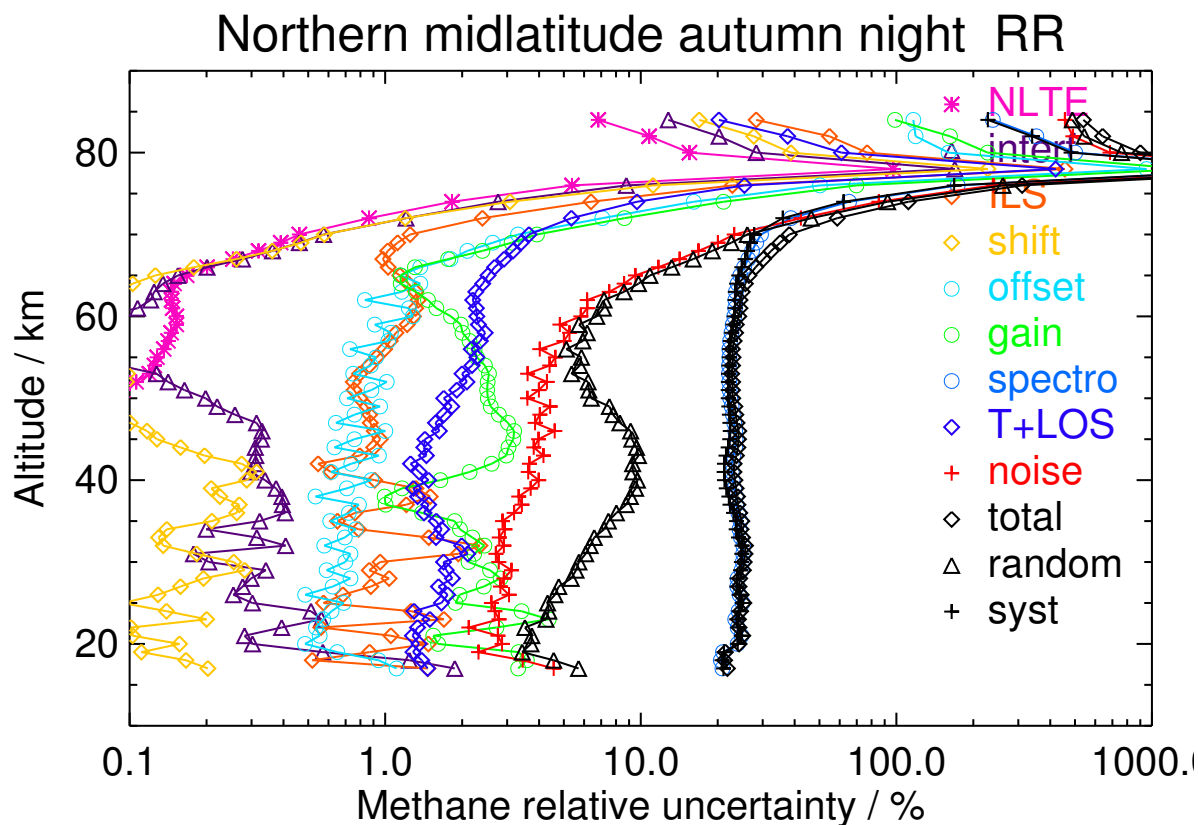

**Figure S84.** V8R\_CH4\_561 Northern midlatitude autumn night

**Table S85.** Methane error budget for Tropics day. All uncertainties are  $1\sigma$ .

| altitude (km) | mean target (ppbv) | NLTE (ppbv) | interf (ppbv) | ILS (ppbv) | shift (ppbv) | offset (ppbv) | gain (ppbv) | spectro (ppbv) | T+LOS (ppbv) | noise (ppbv) | random (ppbv) | syst (ppbv) | total (ppbv) |
|---------------|--------------------|-------------|---------------|------------|--------------|---------------|-------------|----------------|--------------|--------------|---------------|-------------|--------------|
| 30            | 1465.29            | 0.04        | 4.11          | 14.73      | 2.37         | 6.55          | 7.44        | 366.26         | 21.49        | 28.87        | 44.88         | 365.74      | 368.49       |
| 35            | 1241.32            | 0.18        | 4.42          | 5.01       | 2.78         | 4.95          | 9.37        | 288.42         | 16.06        | 24.58        | 39.95         | 287.43      | 290.19       |
| 40            | 713.48             | 0.28        | 3.05          | 10.49      | 1.69         | 3.76          | 14.04       | 143.31         | 8.73         | 18.37        | 34.86         | 141.67      | 145.89       |
| 45            | 428.15             | 0.31        | 1.65          | 2.51       | 1.00         | 2.85          | 10.13       | 89.27          | 4.81         | 12.58        | 22.36         | 88.16       | 90.95        |
| 50            | 297.95             | 0.37        | 0.67          | 2.89       | 0.32         | 1.54          | 7.18        | 65.03          | 3.98         | 9.00         | 15.79         | 64.34       | 66.25        |
| 55            | 203.17             | 0.32        | 0.14          | 2.00       | 0.24         | 1.28          | 3.98        | 45.99          | 3.45         | 7.39         | 10.85         | 45.67       | 46.94        |
| 60            | 158.49             | 0.26        | 0.12          | 1.29       | 0.17         | 2.60          | 2.25        | 37.82          | 3.12         | 11.52        | 13.03         | 37.64       | 39.83        |
| 65            | 130.76             | 0.19        | 0.21          | 0.60       | 0.18         | 1.61          | 0.98        | 32.03          | 2.65         | 13.68        | 14.56         | 31.81       | 34.99        |
| 70            | 97.46              | 0.52        | 0.29          | 0.91       | 0.37         | 2.37          | 1.35        | 24.89          | 2.72         | 19.06        | 20.03         | 24.44       | 31.60        |
| 74            | 51.95              | 1.30        | 1.06          | 1.06       | 1.61         | 4.75          | 8.08        | 26.84          | 3.20         | 30.07        | 31.92         | 26.65       | 41.58        |
| 80            | 6.16               | 1.73        | 1.81          | 1.69       | 2.99         | 9.76          | 13.98       | 36.55          | 2.45         | 44.12        | 46.81         | 37.49       | 59.98        |
| 84            | -3.67              | 0.98        | 1.08          | 1.08       | 1.69         | 7.45          | 7.87        | 21.43          | 0.83         | 30.49        | 32.05         | 22.05       | 38.91        |

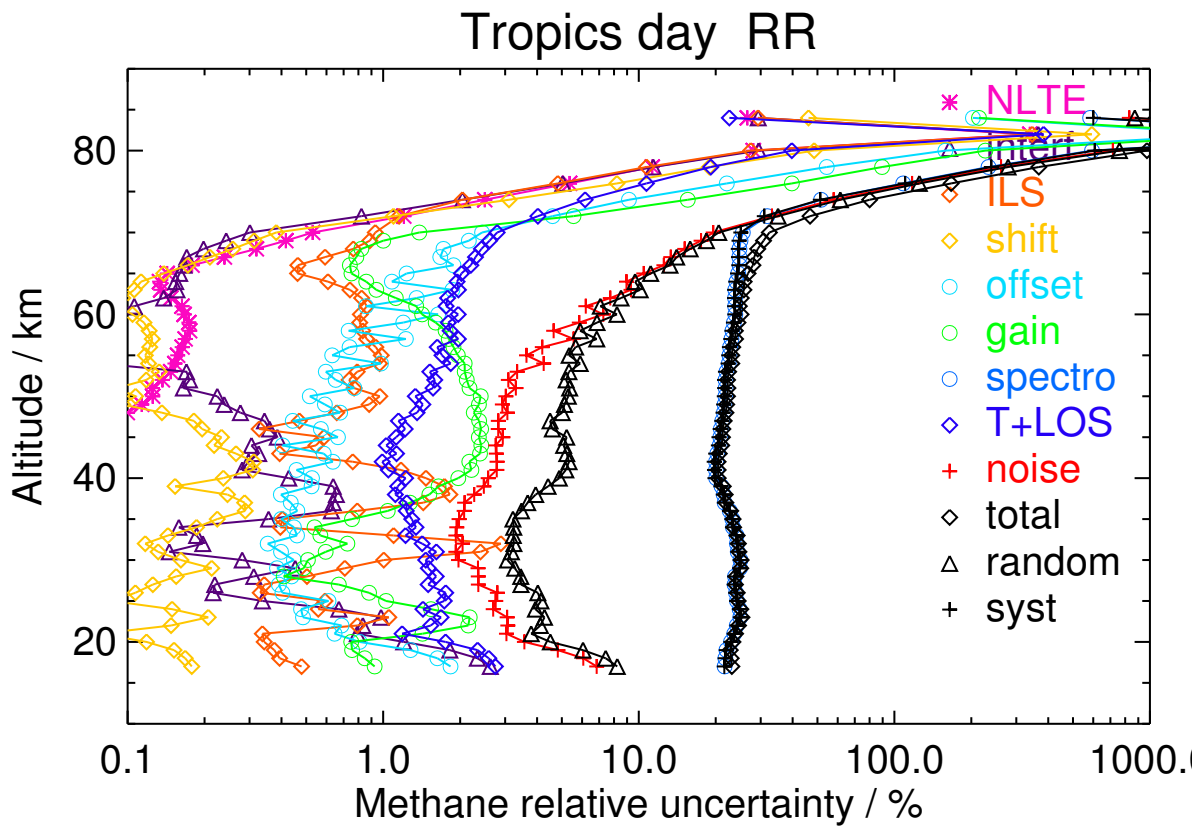

**Figure S85.** V8R\_CH4\_561 Tropics day

**Table S86.** Methane error budget for Tropics night. All uncertainties are  $1\sigma$ .

| altitude (km) | mean target (ppbv) | NLTE (ppbv) | interf (ppbv) | ILS (ppbv) | shift (ppbv) | offset (ppbv) | gain (ppbv) | spectro (ppbv) | T+LOS (ppbv) | noise (ppbv) | random (ppbv) | syst (ppbv) | total (ppbv) |
|---------------|--------------------|-------------|---------------|------------|--------------|---------------|-------------|----------------|--------------|--------------|---------------|-------------|--------------|
| 30            | 1460.93            | 0.01        | 4.74          | 16.98      | 2.88         | 6.16          | 7.94        | 365.15         | 20.56        | 28.93        | 47.08         | 364.41      | 367.44       |
| 35            | 1235.27            | 0.06        | 4.45          | 7.60       | 2.74         | 5.06          | 9.51        | 289.56         | 16.43        | 24.56        | 41.75         | 288.40      | 291.40       |
| 40            | 728.09             | 0.09        | 3.48          | 10.91      | 1.67         | 4.16          | 12.50       | 146.75         | 9.15         | 19.20        | 37.71         | 144.47      | 149.31       |
| 45            | 428.67             | 0.13        | 1.59          | 2.25       | 1.05         | 2.47          | 9.79        | 90.08          | 4.37         | 11.89        | 20.38         | 89.27       | 91.57        |
| 50            | 288.35             | 0.18        | 0.70          | 2.81       | 0.32         | 1.58          | 6.74        | 62.80          | 4.08         | 9.18         | 16.93         | 61.76       | 64.04        |
| 55            | 206.78             | 0.15        | 0.15          | 2.16       | 0.26         | 1.64          | 3.98        | 46.75          | 3.87         | 8.30         | 12.13         | 46.32       | 47.88        |
| 60            | 171.23             | 0.11        | 0.17          | 1.71       | 0.18         | 2.90          | 2.54        | 40.23          | 3.44         | 12.17        | 14.12         | 39.96       | 42.38        |
| 65            | 141.48             | 0.25        | 0.19          | 0.64       | 0.16         | 1.65          | 1.32        | 34.37          | 3.13         | 13.92        | 15.45         | 33.93       | 37.28        |
| 70            | 105.96             | 0.92        | 0.75          | 1.86       | 1.02         | 2.43          | 5.17        | 31.15          | 3.54         | 21.22        | 22.91         | 30.76       | 38.36        |
| 74            | 55.09              | 1.36        | 1.64          | 2.55       | 2.81         | 5.47          | 12.01       | 36.55          | 3.92         | 31.70        | 34.47         | 36.89       | 50.48        |
| 80            | -1.59              | 1.16        | 1.69          | 2.72       | 2.67         | 10.40         | 11.26       | 32.18          | 2.31         | 44.85        | 47.44         | 32.48       | 57.50        |
| 84            | -8.42              | 0.62        | 0.90          | 1.55       | 1.21         | 8.11          | 5.47        | 16.62          | 0.80         | 31.11        | 32.74         | 16.54       | 36.68        |

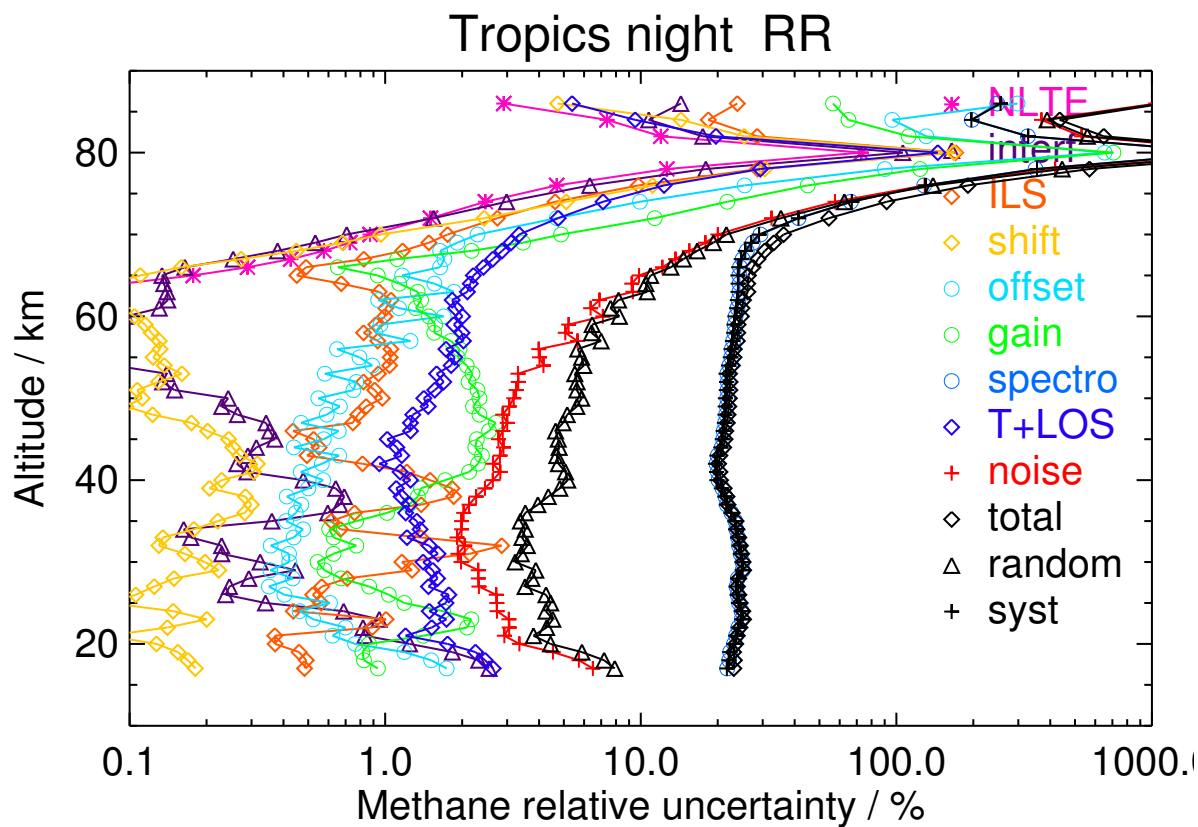

**Figure S86.** V8R\_CH4\_561 Tropics night

**Table S87.** Methane error budget for Southern midlatitude winter day. All uncertainties are  $1\sigma$ .

| altitude (km) | mean target (ppbv) | NLTE (ppbv) | interf (ppbv) | ILS (ppbv) | shift (ppbv) | offset (ppbv) | gain (ppbv) | spectro (ppbv) | T+LOS (ppbv) | noise (ppbv) | random (ppbv) | syst (ppbv) | total (ppbv) |
|---------------|--------------------|-------------|---------------|------------|--------------|---------------|-------------|----------------|--------------|--------------|---------------|-------------|--------------|
| 30            | 1205.12            | 0.05        | 6.49          | 23.97      | 2.69         | 7.94          | 47.67       | 299.64         | 23.68        | 33.66        | 96.11         | 291.90      | 307.31       |
| 35            | 759.40             | 0.07        | 2.92          | 8.74       | 2.36         | 5.78          | 20.55       | 191.68         | 15.07        | 22.67        | 66.02         | 183.49      | 195.01       |
| 40            | 251.34             | 0.07        | 2.43          | 3.68       | 1.25         | 3.63          | 3.71        | 58.14          | 4.66         | 16.68        | 28.76         | 53.86       | 61.06        |
| 45            | 245.28             | 0.20        | 1.20          | 2.03       | 0.38         | 1.66          | 5.81        | 53.51          | 3.40         | 11.05        | 17.66         | 52.23       | 55.13        |
| 50            | 253.06             | 0.41        | 0.43          | 2.42       | 0.22         | 2.08          | 6.47        | 57.24          | 3.91         | 9.55         | 18.38         | 55.66       | 58.62        |
| 55            | 215.71             | 0.48        | 0.15          | 1.98       | 0.25         | 2.44          | 5.01        | 49.74          | 4.57         | 11.89        | 16.87         | 48.86       | 51.69        |
| 60            | 173.25             | 0.45        | 0.12          | 1.94       | 0.16         | 1.90          | 3.00        | 41.76          | 3.52         | 11.06        | 14.19         | 41.16       | 43.54        |
| 65            | 142.48             | 0.36        | 0.22          | 0.98       | 0.29         | 2.47          | 1.37        | 35.40          | 3.46         | 16.01        | 18.65         | 34.38       | 39.12        |
| 70            | 108.29             | 0.78        | 0.61          | 1.27       | 0.94         | 3.09          | 3.05        | 30.88          | 3.62         | 21.84        | 25.08         | 28.92       | 38.28        |
| 74            | 76.25              | 1.41        | 1.32          | 2.89       | 1.94         | 6.42          | 7.41        | 29.33          | 3.67         | 34.32        | 37.73         | 27.21       | 46.52        |
| 80            | 21.23              | 1.52        | 1.68          | 3.20       | 2.63         | 10.05         | 9.62        | 24.99          | 2.50         | 44.44        | 47.49         | 23.80       | 53.12        |
| 84            | 3.42               | 0.95        | 0.95          | 2.10       | 1.12         | 7.63          | 4.87        | 12.84          | 0.93         | 29.88        | 31.66         | 12.08       | 33.88        |

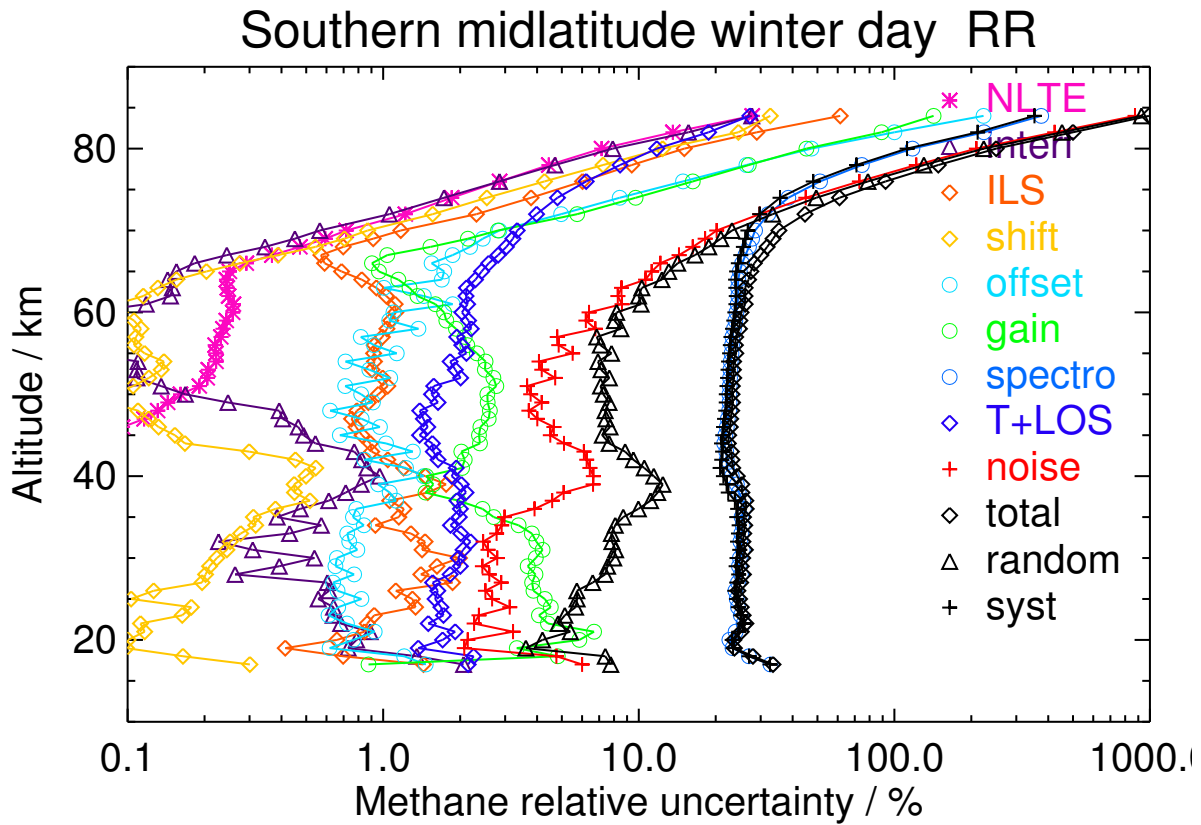

**Figure S87.** V8R\_CH4\_561 Southern midlatitude winter day

**Table S88.** Methane error budget for Southern midlatitude winter night. All uncertainties are  $1\sigma$ .

| altitude (km) | mean target (ppbv) | NLTE (ppbv) | interf (ppbv) | ILS (ppbv) | shift (ppbv) | offset (ppbv) | gain (ppbv) | spectro (ppbv) | T+LOS (ppbv) | noise (ppbv) | random (ppbv) | syst (ppbv) | total (ppbv) |
|---------------|--------------------|-------------|---------------|------------|--------------|---------------|-------------|----------------|--------------|--------------|---------------|-------------|--------------|
| 30            | 958.27             | 0.04        | 4.30          | 16.86      | 2.34         | 7.36          | 31.41       | 243.65         | 20.11        | 33.03        | 95.72         | 230.32      | 249.42       |
| 35            | 635.31             | 0.06        | 2.80          | 6.96       | 2.17         | 5.73          | 14.72       | 164.20         | 13.78        | 26.47        | 72.22         | 151.49      | 167.82       |
| 40            | 216.68             | 0.06        | 2.14          | 2.94       | 1.31         | 3.85          | 3.87        | 52.65          | 4.59         | 18.66        | 26.59         | 49.79       | 56.44        |
| 45            | 202.41             | 0.12        | 0.88          | 1.70       | 0.39         | 1.81          | 5.60        | 48.65          | 3.30         | 11.86        | 20.89         | 46.04       | 50.56        |
| 50            | 212.77             | 0.21        | 0.32          | 2.32       | 0.28         | 1.75          | 5.22        | 50.18          | 3.14         | 8.40         | 17.15         | 48.38       | 51.33        |
| 55            | 188.02             | 0.29        | 0.10          | 1.90       | 0.22         | 2.19          | 4.18        | 44.85          | 3.85         | 10.98        | 15.90         | 43.82       | 46.61        |
| 60            | 158.15             | 0.35        | 0.13          | 1.95       | 0.17         | 1.94          | 2.69        | 38.96          | 3.10         | 11.14        | 14.26         | 38.25       | 40.82        |
| 65            | 129.87             | 0.44        | 0.24          | 1.13       | 0.44         | 2.30          | 1.53        | 32.89          | 3.15         | 16.17        | 19.08         | 31.60       | 36.91        |
| 70            | 96.48              | 0.58        | 0.50          | 0.98       | 1.02         | 3.28          | 2.81        | 27.74          | 3.18         | 22.42        | 25.49         | 25.57       | 36.10        |
| 74            | 62.34              | 0.73        | 1.07          | 2.10       | 1.92         | 6.73          | 6.73        | 24.63          | 3.27         | 34.80        | 37.83         | 22.32       | 43.92        |
| 80            | 11.92              | 0.77        | 1.58          | 3.19       | 2.84         | 9.95          | 10.03       | 21.34          | 2.29         | 43.99        | 47.48         | 19.04       | 51.15        |
| 84            | -15.29             | 0.42        | 1.04          | 2.52       | 1.11         | 7.84          | 6.16        | 11.37          | 0.83         | 29.97        | 32.21         | 9.94        | 33.71        |

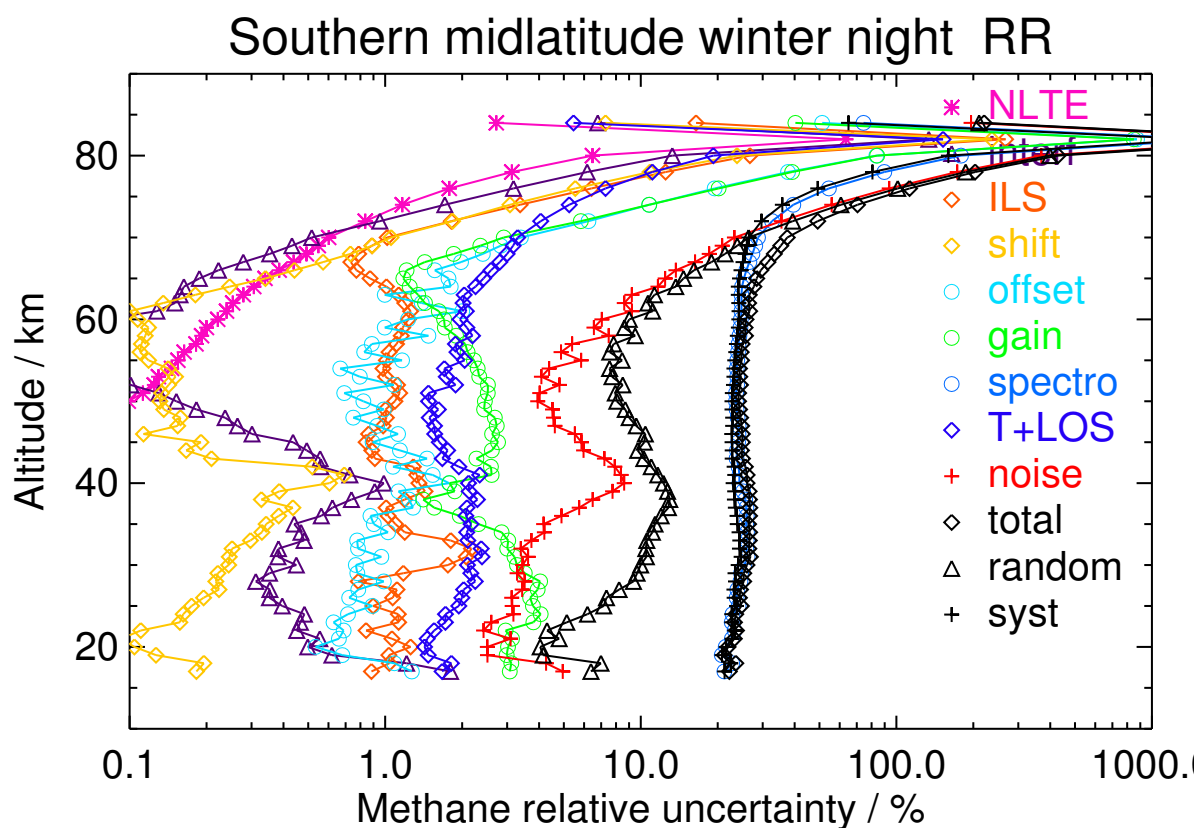

**Figure S88.** V8R\_CH4\_561 Southern midlatitude winter night

**Table S89.** Methane error budget for Southern midlatitude spring day. All uncertainties are  $1\sigma$ .

| altitude (km) | mean target (ppbv) | NLTE (ppbv) | interf (ppbv) | ILS (ppbv) | shift (ppbv) | offset (ppbv) | gain (ppbv) | spectro (ppbv) | T+LOS (ppbv) | noise (ppbv) | random (ppbv) | syst (ppbv) | total (ppbv) |
|---------------|--------------------|-------------|---------------|------------|--------------|---------------|-------------|----------------|--------------|--------------|---------------|-------------|--------------|
| 30            | 1178.92            | 0.04        | 4.50          | 34.00      | 3.04         | 7.87          | 37.36       | 313.98         | 20.18        | 32.05        | 93.45         | 306.48      | 320.41       |
| 35            | 706.98             | 0.06        | 2.34          | 6.62       | 2.39         | 5.03          | 17.54       | 174.86         | 12.98        | 19.07        | 51.86         | 169.72      | 177.47       |
| 40            | 366.98             | 0.14        | 1.68          | 3.62       | 1.28         | 3.68          | 6.61        | 77.08          | 5.42         | 16.52        | 25.12         | 75.42       | 79.49        |
| 45            | 253.49             | 0.23        | 1.24          | 2.56       | 0.41         | 1.36          | 4.97        | 53.97          | 3.39         | 10.81        | 13.97         | 53.68       | 55.46        |
| 50            | 266.20             | 0.35        | 0.55          | 2.31       | 0.24         | 2.10          | 5.42        | 57.90          | 3.99         | 9.45         | 11.79         | 57.95       | 59.14        |
| 55            | 236.76             | 0.46        | 0.24          | 2.04       | 0.24         | 2.21          | 4.58        | 52.86          | 4.57         | 10.49        | 12.58         | 52.89       | 54.37        |
| 60            | 213.05             | 0.50        | 0.14          | 2.72       | 0.16         | 1.91          | 3.71        | 49.95          | 3.80         | 9.92         | 12.47         | 49.78       | 51.32        |
| 65            | 162.80             | 0.29        | 0.22          | 1.28       | 0.20         | 2.31          | 1.66        | 39.73          | 3.20         | 14.39        | 17.04         | 38.93       | 42.50        |
| 70            | 93.05              | 0.31        | 0.36          | 0.74       | 0.47         | 2.25          | 2.00        | 26.69          | 2.50         | 19.52        | 21.26         | 25.64       | 33.31        |
| 74            | 34.51              | 1.00        | 1.28          | 1.82       | 1.88         | 5.20          | 9.33        | 24.49          | 2.78         | 30.83        | 33.04         | 24.30       | 41.01        |
| 80            | -16.01             | 1.56        | 2.32          | 3.15       | 3.82         | 9.46          | 17.04       | 33.46          | 3.19         | 43.49        | 46.38         | 35.80       | 58.59        |
| 84            | -14.27             | 0.93        | 1.47          | 2.07       | 2.45         | 6.72          | 10.54       | 20.92          | 1.34         | 28.86        | 30.69         | 22.36       | 37.97        |

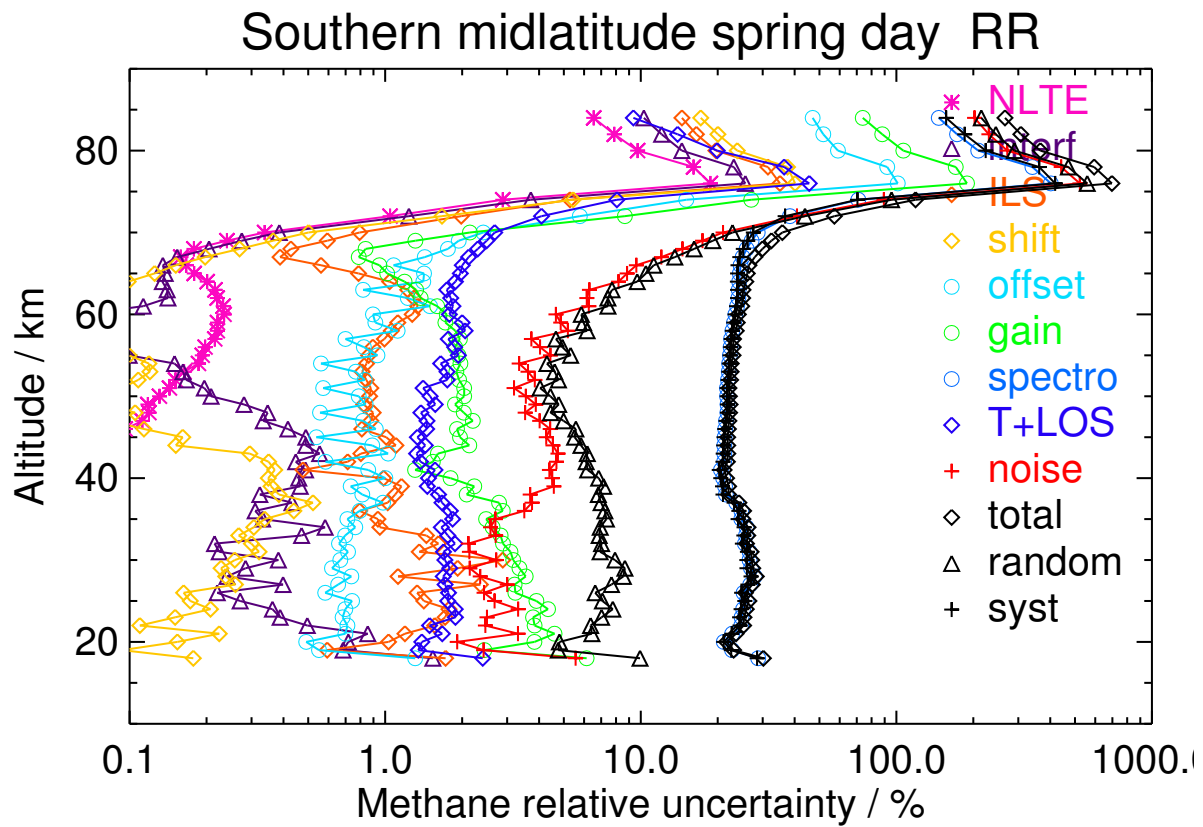

**Figure S89.** V8R\_CH4\_561 Southern midlatitude spring day



**Table S90.** Methane error budget for Southern midlatitude spring night. All uncertainties are  $1\sigma$ .

| altitude (km) | mean target (ppbv) | NLTE (ppbv) | interf (ppbv) | ILS (ppbv) | shift (ppbv) | offset (ppbv) | gain (ppbv) | spectro (ppbv) | T+LOS (ppbv) | noise (ppbv) | random (ppbv) | syst (ppbv) | total (ppbv) |
|---------------|--------------------|-------------|---------------|------------|--------------|---------------|-------------|----------------|--------------|--------------|---------------|-------------|--------------|
| 30            | 1158.47            | 0.02        | 4.12          | 11.09      | 3.47         | 8.46          | 44.51       | 292.64         | 19.05        | 29.83        | 92.64         | 283.75      | 298.49       |
| 35            | 782.99             | 0.04        | 2.92          | 8.53       | 2.73         | 5.48          | 25.03       | 189.68         | 13.20        | 20.92        | 62.64         | 182.79      | 193.22       |
| 40            | 371.72             | 0.06        | 1.49          | 4.42       | 1.10         | 3.94          | 6.92        | 77.37          | 5.83         | 16.79        | 23.47         | 76.40       | 79.93        |
| 45            | 255.09             | 0.10        | 1.18          | 2.09       | 0.42         | 1.60          | 5.21        | 54.25          | 3.30         | 10.68        | 13.40         | 54.07       | 55.71        |
| 50            | 261.98             | 0.18        | 0.56          | 2.02       | 0.21         | 1.78          | 5.15        | 56.95          | 3.88         | 9.00         | 11.97         | 56.83       | 58.08        |
| 55            | 248.65             | 0.28        | 0.19          | 2.25       | 0.27         | 2.38          | 5.07        | 55.19          | 5.17         | 11.38        | 13.71         | 55.23       | 56.91        |
| 60            | 217.12             | 0.28        | 0.17          | 2.71       | 0.17         | 2.36          | 3.64        | 50.81          | 4.26         | 11.22        | 13.75         | 50.62       | 52.46        |
| 65            | 146.58             | 0.16        | 0.25          | 1.37       | 0.20         | 1.99          | 1.29        | 36.61          | 3.55         | 14.73        | 17.34         | 35.74       | 39.72        |
| 70            | 75.57              | 0.39        | 0.50          | 0.95       | 0.54         | 2.39          | 3.02        | 24.25          | 2.70         | 20.26        | 22.80         | 22.41       | 31.97        |
| 74            | 23.61              | 0.72        | 1.10          | 1.86       | 1.53         | 5.40          | 8.18        | 23.17          | 3.06         | 31.35        | 33.64         | 22.37       | 40.40        |
| 80            | -12.89             | 0.93        | 1.90          | 3.38       | 3.15         | 9.35          | 14.56       | 31.23          | 3.21         | 43.49        | 46.08         | 32.86       | 56.59        |
| 84            | -10.15             | 0.56        | 1.28          | 2.54       | 2.11         | 6.66          | 9.45        | 20.40          | 1.29         | 28.53        | 30.57         | 21.06       | 37.12        |

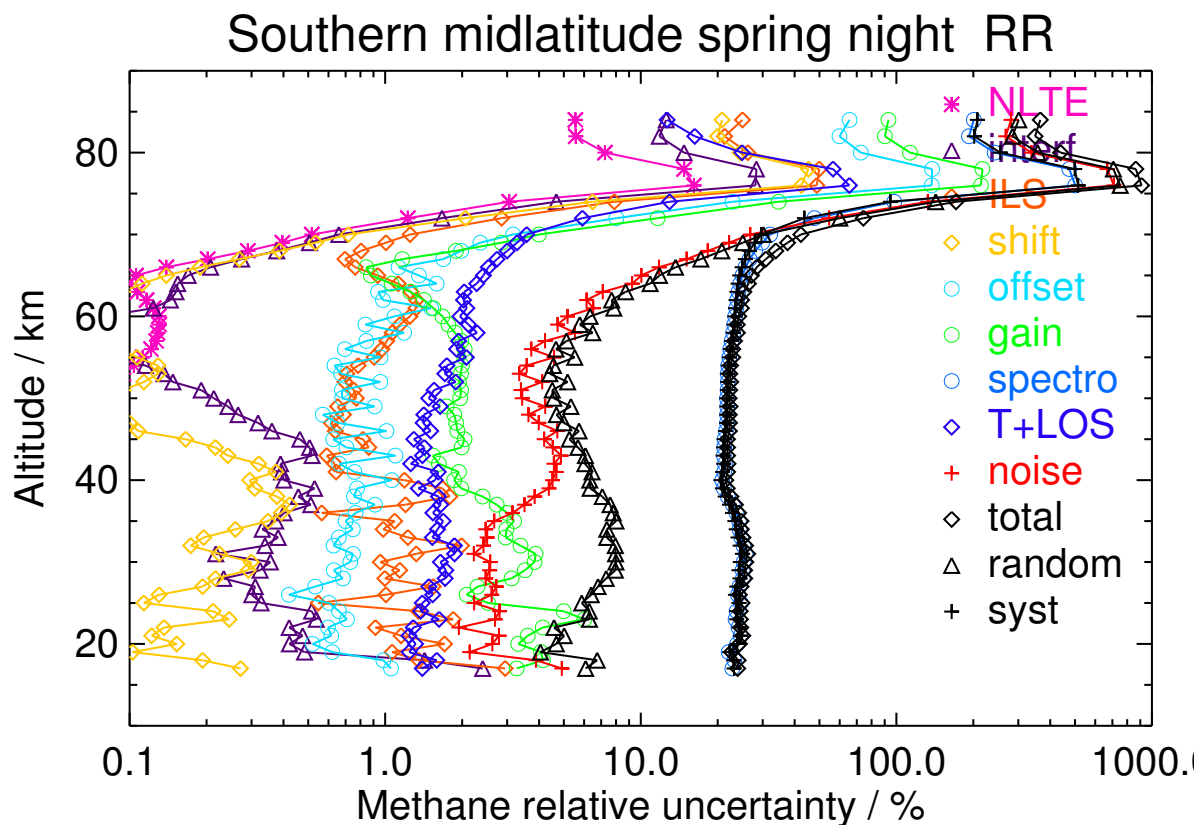

**Figure S90.** V8R\_CH4\_561 Southern midlatitude spring night

**Table S91.** Methane error budget for Southern midlatitude summer day. All uncertainties are  $1\sigma$ .

| altitude (km) | mean target (ppbv) | NLTE (ppbv) | interf (ppbv) | ILS (ppbv) | shift (ppbv) | offset (ppbv) | gain (ppbv) | spectro (ppbv) | T+LOS (ppbv) | noise (ppbv) | random (ppbv) | syst (ppbv) | total (ppbv) |
|---------------|--------------------|-------------|---------------|------------|--------------|---------------|-------------|----------------|--------------|--------------|---------------|-------------|--------------|
| 30            | 954.71             | 0.04        | 6.38          | 19.59      | 2.20         | 6.92          | 19.10       | 254.45         | 16.38        | 24.10        | 41.59         | 254.37      | 257.75       |
| 35            | 722.71             | 0.07        | 4.16          | 4.90       | 1.56         | 4.43          | 5.85        | 164.83         | 9.43         | 21.37        | 29.08         | 164.21      | 166.77       |
| 40            | 427.84             | 0.12        | 2.02          | 4.42       | 1.53         | 2.79          | 7.96        | 90.12          | 5.26         | 14.34        | 28.90         | 87.27       | 91.93        |
| 45            | 253.73             | 0.17        | 2.00          | 1.65       | 0.77         | 2.49          | 5.98        | 61.22          | 2.93         | 11.71        | 30.20         | 55.06       | 62.80        |
| 50            | 182.05             | 0.21        | 0.76          | 1.71       | 0.20         | 1.43          | 4.25        | 46.99          | 2.39         | 8.25         | 26.80         | 39.84       | 48.01        |
| 55            | 201.66             | 0.39        | 0.39          | 1.30       | 0.34         | 1.73          | 4.67        | 52.60          | 3.38         | 7.01         | 29.21         | 44.74       | 53.43        |
| 60            | 218.88             | 0.43        | 0.22          | 2.42       | 0.31         | 3.02          | 4.08        | 53.54          | 4.38         | 11.40        | 21.41         | 50.88       | 55.20        |
| 65            | 179.32             | 0.28        | 0.22          | 1.08       | 0.25         | 2.09          | 2.17        | 43.35          | 3.39         | 12.64        | 15.39         | 42.71       | 45.39        |
| 70            | 136.66             | 0.61        | 0.38          | 1.10       | 0.47         | 3.08          | 0.98        | 36.11          | 2.75         | 19.19        | 21.30         | 35.20       | 41.14        |
| 74            | 91.10              | 1.54        | 1.49          | 3.07       | 1.83         | 4.60          | 4.89        | 33.54          | 1.70         | 29.32        | 31.98         | 32.06       | 45.28        |
| 80            | 35.91              | 2.12        | 3.36          | 7.38       | 4.91         | 8.77          | 11.49       | 42.19          | 0.07         | 42.90        | 46.95         | 41.47       | 62.64        |
| 84            | 14.07              | 1.23        | 2.21          | 4.90       | 3.23         | 6.65          | 7.31        | 26.68          | 0.10         | 29.29        | 31.99         | 26.17       | 41.33        |

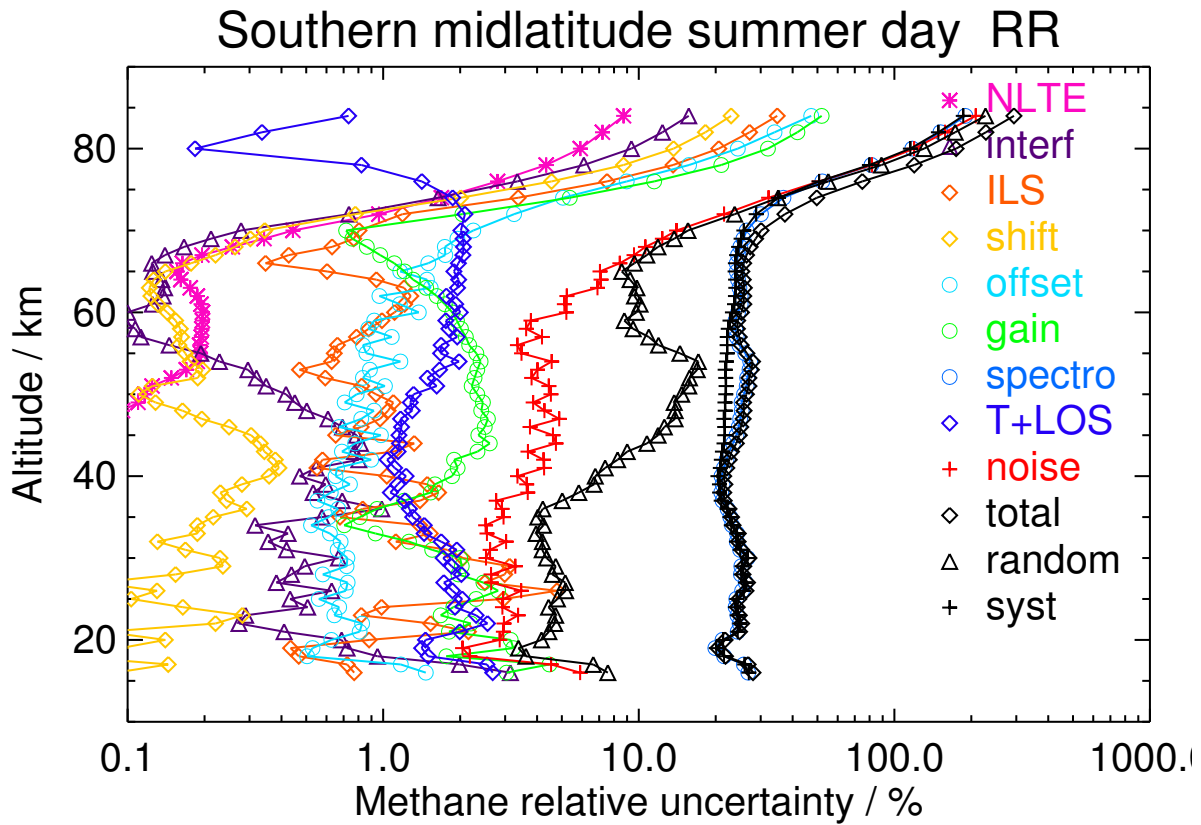

**Figure S91.** V8R\_CH4\_561 Southern midlatitude summer day

**Table S92.** Methane error budget for Southern midlatitude summer night. All uncertainties are  $1\sigma$ .

| altitude<br>(km) | mean target<br>(ppbv) | NLTE<br>(ppbv) | interf<br>(ppbv) | ILS<br>(ppbv) | shift<br>(ppbv) | offset<br>(ppbv) | gain<br>(ppbv) | spectro<br>(ppbv) | T+LOS<br>(ppbv) | noise<br>(ppbv) | random<br>(ppbv) | syst<br>(ppbv) | total<br>(ppbv) |
|------------------|-----------------------|----------------|------------------|---------------|-----------------|------------------|----------------|-------------------|-----------------|-----------------|------------------|----------------|-----------------|
| 30               | 930.12                | 0.01           | 5.35             | 23.70         | 2.45            | 7.53             | 28.02          | 240.81            | 16.19           | 26.50           | 46.17            | 241.37         | 245.75          |
| 35               | 701.80                | 0.04           | 4.82             | 5.10          | 1.69            | 4.54             | 6.47           | 161.56            | 10.07           | 21.49           | 30.18            | 160.84         | 163.65          |
| 40               | 393.02                | 0.06           | 1.95             | 5.88          | 1.33            | 2.91             | 7.63           | 78.75             | 4.58            | 13.61           | 23.63            | 77.17          | 80.71           |
| 45               | 218.74                | 0.07           | 1.46             | 3.10          | 0.71            | 2.29             | 5.35           | 50.57             | 2.32            | 12.21           | 25.15            | 46.10          | 52.52           |
| 50               | 155.26                | 0.10           | 0.67             | 1.26          | 0.18            | 1.32             | 2.90           | 41.31             | 1.88            | 7.79            | 25.20            | 33.88          | 42.22           |
| 55               | 158.49                | 0.14           | 0.27             | 1.71          | 0.32            | 1.61             | 3.79           | 41.82             | 2.71            | 6.90            | 23.09            | 35.93          | 42.71           |
| 60               | 165.39                | 0.14           | 0.24             | 1.83          | 0.26            | 2.55             | 2.90           | 42.57             | 3.11            | 9.98            | 19.89            | 39.29          | 44.04           |
| 65               | 166.26                | 0.11           | 0.29             | 1.19          | 0.25            | 2.03             | 1.78           | 39.83             | 3.30            | 12.48           | 15.87            | 38.86          | 41.98           |
| 70               | 145.43                | 0.80           | 0.70             | 1.39          | 0.66            | 2.73             | 1.64           | 36.15             | 3.58            | 19.81           | 21.97            | 35.26          | 41.54           |
| 74               | 99.94                 | 1.67           | 1.91             | 2.27          | 2.10            | 4.58             | 6.94           | 35.59             | 2.60            | 29.76           | 32.78            | 34.19          | 47.37           |
| 80               | 40.38                 | 1.88           | 2.58             | 5.56          | 3.77            | 9.35             | 9.23           | 35.41             | 0.34            | 44.28           | 47.65            | 34.25          | 58.68           |
| 84               | 11.89                 | 1.03           | 1.61             | 3.89          | 2.42            | 7.10             | 5.61           | 21.33             | 0.03            | 30.30           | 32.28            | 20.92          | 38.46           |

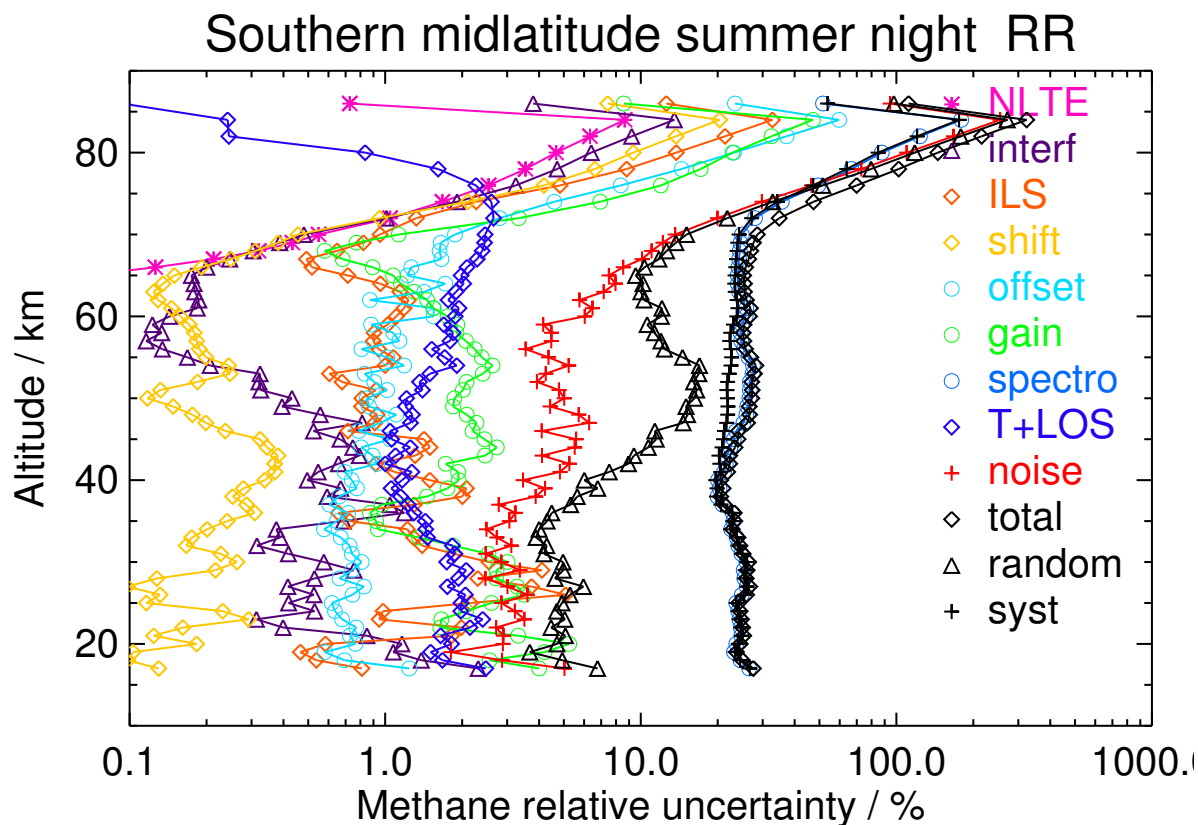

**Figure S92.** V8R\_CH4\_561 Southern midlatitude summer night

**Table S93.** Methane error budget for Southern midlatitude autumn day. All uncertainties are  $1\sigma$ .

| altitude (km) | mean target (ppbv) | NLTE (ppbv) | interf (ppbv) | ILS (ppbv) | shift (ppbv) | offset (ppbv) | gain (ppbv) | spectro (ppbv) | T+LOS (ppbv) | noise (ppbv) | random (ppbv) | syst (ppbv) | total (ppbv) |
|---------------|--------------------|-------------|---------------|------------|--------------|---------------|-------------|----------------|--------------|--------------|---------------|-------------|--------------|
| 30            | 961.59             | 0.03        | 3.91          | 23.68      | 2.35         | 6.78          | 22.42       | 236.57         | 20.23        | 31.52        | 53.74         | 235.81      | 241.86       |
| 35            | 700.44             | 0.06        | 1.90          | 5.17       | 1.17         | 4.72          | 13.57       | 166.04         | 11.60        | 20.10        | 48.28         | 161.29      | 168.37       |
| 40            | 561.95             | 0.26        | 1.71          | 4.73       | 1.56         | 4.85          | 9.75        | 123.69         | 8.05         | 22.27        | 43.71         | 118.73      | 126.52       |
| 45            | 442.62             | 0.42        | 1.64          | 3.41       | 0.52         | 2.40          | 12.31       | 99.00          | 5.76         | 14.05        | 28.57         | 96.89       | 101.01       |
| 50            | 356.38             | 0.57        | 0.87          | 2.65       | 0.35         | 2.81          | 8.74        | 80.11          | 5.87         | 12.98        | 20.04         | 79.45       | 81.93        |
| 55            | 323.39             | 0.79        | 0.28          | 2.32       | 0.29         | 3.08          | 7.85        | 72.07          | 7.37         | 14.53        | 17.79         | 72.26       | 74.41        |
| 60            | 263.56             | 0.63        | 0.17          | 2.93       | 0.21         | 2.50          | 4.61        | 61.40          | 5.93         | 13.11        | 15.28         | 61.48       | 63.35        |
| 65            | 158.20             | 0.27        | 0.24          | 1.74       | 0.23         | 2.18          | 1.55        | 39.11          | 4.10         | 15.87        | 18.02         | 38.52       | 42.53        |
| 70            | 69.45              | 0.27        | 0.27          | 0.70       | 0.30         | 2.70          | 1.46        | 21.82          | 2.39         | 20.18        | 21.51         | 20.90       | 29.99        |
| 74            | 41.21              | 0.85        | 0.83          | 1.09       | 0.85         | 6.07          | 6.03        | 18.73          | 2.57         | 32.44        | 34.21         | 17.77       | 38.55        |
| 80            | 20.47              | 1.53        | 1.73          | 2.22       | 2.17         | 10.03         | 13.04       | 27.57          | 3.34         | 43.75        | 46.80         | 27.95       | 54.51        |
| 84            | 2.77               | 0.99        | 1.28          | 1.73       | 1.49         | 7.15          | 9.33        | 19.47          | 1.67         | 28.66        | 30.69         | 20.19       | 36.73        |

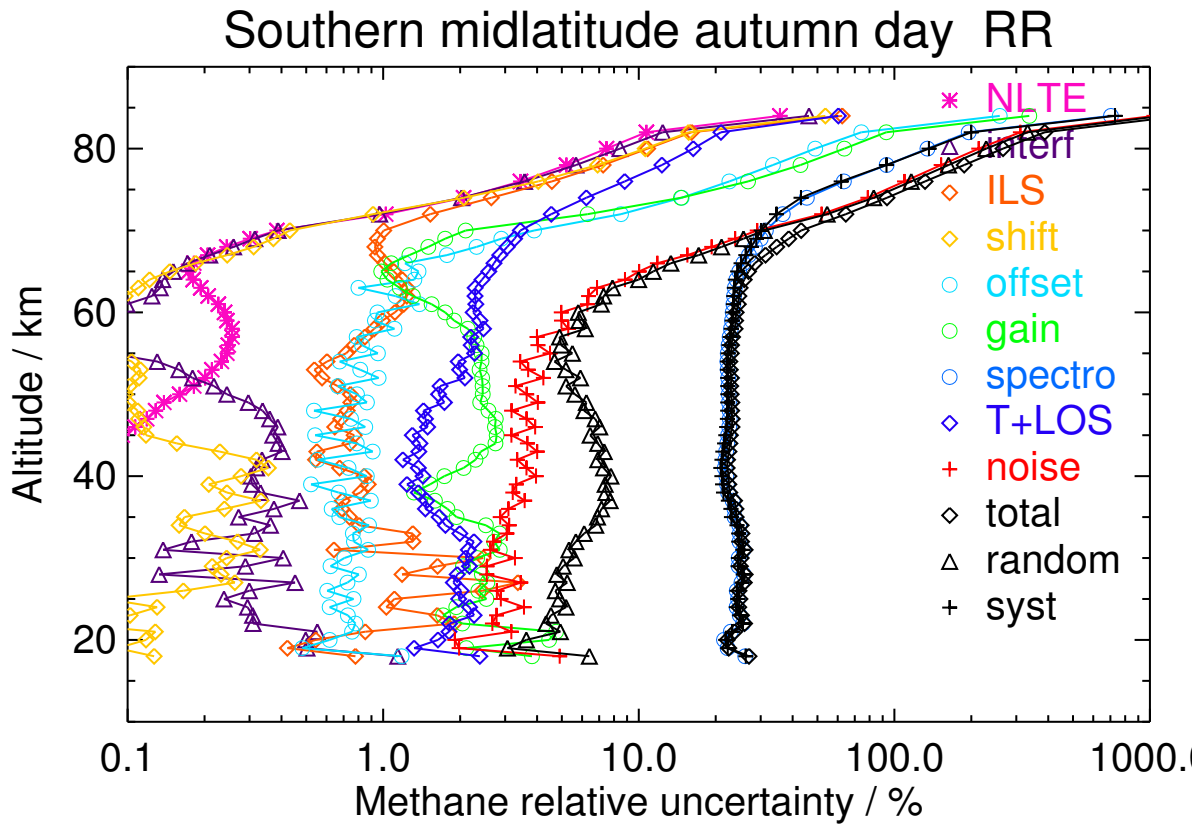

**Figure S93.** V8R\_CH4\_561 Southern midlatitude autumn day

**Table S94.** Methane error budget for Southern midlatitude autumn night. All uncertainties are  $1\sigma$ .

| altitude (km) | mean target (ppbv) | NLTE (ppbv) | interf (ppbv) | ILS (ppbv) | shift (ppbv) | offset (ppbv) | gain (ppbv) | spectro (ppbv) | T+LOS (ppbv) | noise (ppbv) | random (ppbv) | syst (ppbv) | total (ppbv) |
|---------------|--------------------|-------------|---------------|------------|--------------|---------------|-------------|----------------|--------------|--------------|---------------|-------------|--------------|
| 30            | 907.47             | 0.01        | 4.70          | 22.54      | 2.24         | 7.19          | 27.26       | 235.25         | 19.95        | 31.38        | 50.61         | 235.57      | 240.95       |
| 35            | 644.44             | 0.04        | 2.46          | 3.88       | 1.05         | 4.50          | 13.24       | 152.84         | 11.05        | 19.69        | 40.55         | 149.81      | 155.21       |
| 40            | 462.56             | 0.09        | 1.56          | 4.93       | 1.27         | 4.56          | 6.77        | 99.41          | 6.79         | 20.39        | 37.36         | 95.09       | 102.17       |
| 45            | 394.76             | 0.14        | 1.59          | 1.96       | 0.70         | 1.94          | 8.03        | 84.68          | 4.83         | 13.05        | 29.71         | 80.97       | 86.25        |
| 50            | 339.86             | 0.26        | 0.83          | 2.28       | 0.22         | 2.55          | 7.36        | 73.11          | 5.60         | 12.11        | 19.25         | 72.25       | 74.77        |
| 55            | 318.62             | 0.42        | 0.18          | 2.62       | 0.26         | 3.09          | 7.92        | 69.74          | 7.66         | 14.97        | 18.80         | 69.81       | 72.30        |
| 60            | 257.29             | 0.34        | 0.18          | 3.17       | 0.19         | 2.49          | 4.48        | 60.01          | 6.20         | 13.73        | 17.27         | 59.72       | 62.16        |
| 65            | 141.55             | 0.18        | 0.25          | 1.65       | 0.18         | 2.17          | 1.55        | 35.86          | 3.88         | 16.03        | 18.65         | 34.93       | 39.60        |
| 70            | 67.31              | 0.24        | 0.37          | 0.55       | 0.34         | 2.71          | 1.76        | 20.59          | 2.50         | 20.56        | 22.31         | 19.14       | 29.39        |
| 74            | 25.19              | 0.51        | 0.97          | 1.18       | 1.03         | 6.14          | 6.34        | 17.40          | 2.77         | 32.65        | 34.51         | 16.33       | 38.18        |
| 80            | -13.88             | 0.82        | 2.02          | 2.47       | 2.38         | 9.79          | 13.65       | 26.52          | 3.56         | 43.11        | 46.00         | 27.51       | 53.60        |
| 84            | -0.45              | 0.16        | 0.85          | 0.91       | 1.01         | 7.08          | 5.15        | 12.11          | 1.01         | 28.18        | 29.19         | 13.00       | 31.95        |

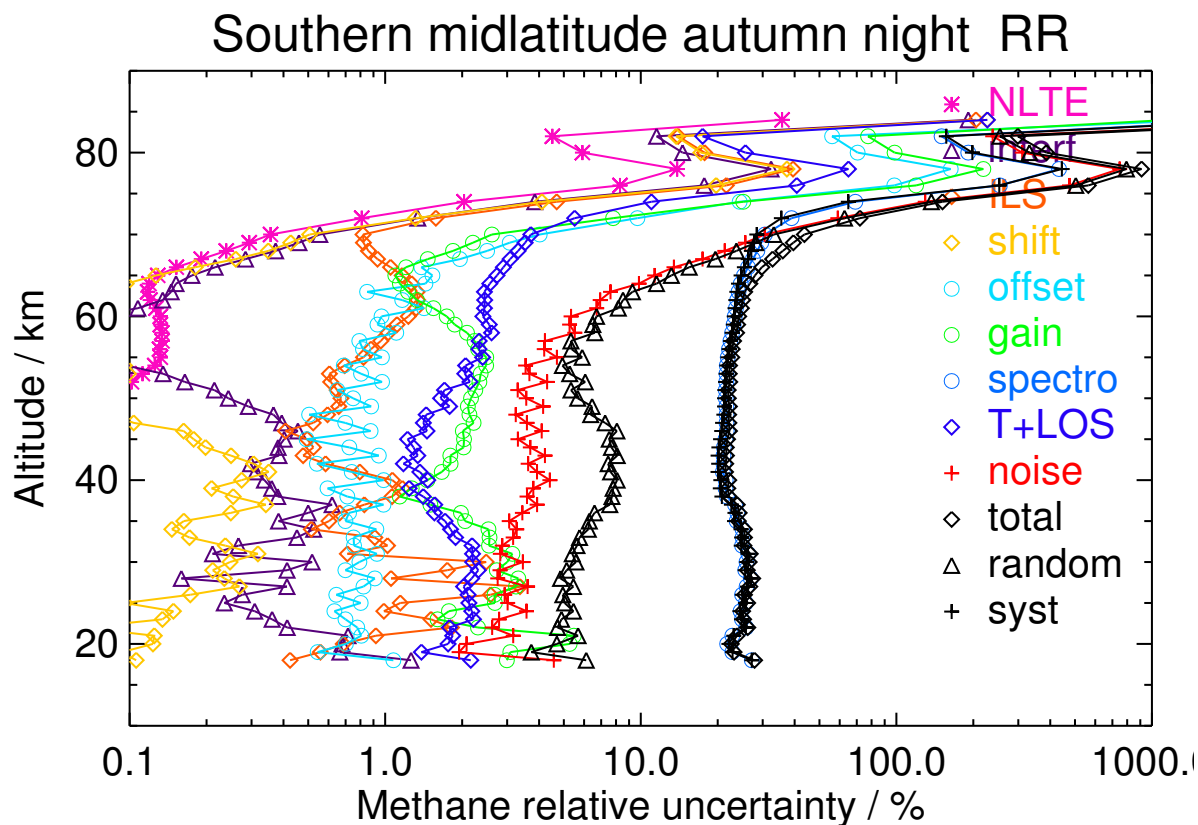

**Figure S94.** V8R\_CH4\_561 Southern midlatitude autumn night

**Table S95.** Methane error budget for Southern polar winter day. All uncertainties are  $1\sigma$ .

| altitude (km) | mean target (ppbv) | NLTE (ppbv) | interf (ppbv) | ILS (ppbv) | shift (ppbv) | offset (ppbv) | gain (ppbv) | spectro (ppbv) | T+LOS (ppbv) | noise (ppbv) | random (ppbv) | syst (ppbv) | total (ppbv) |
|---------------|--------------------|-------------|---------------|------------|--------------|---------------|-------------|----------------|--------------|--------------|---------------|-------------|--------------|
| 30            | 447.95             | 0.06        | 5.33          | 10.59      | 2.82         | 4.79          | 5.93        | 107.20         | 13.83        | 31.06        | 44.12         | 104.44      | 113.38       |
| 35            | 197.20             | 0.10        | 2.74          | 7.09       | 2.11         | 4.40          | 3.20        | 49.40          | 5.54         | 20.58        | 30.99         | 45.01       | 54.65        |
| 40            | 210.09             | 0.09        | 1.40          | 2.93       | 1.13         | 2.88          | 5.81        | 49.86          | 3.34         | 13.96        | 19.50         | 48.64       | 52.40        |
| 45            | 242.65             | 0.19        | 0.79          | 2.19       | 0.54         | 1.87          | 6.40        | 56.90          | 3.31         | 11.05        | 20.34         | 54.83       | 58.48        |
| 50            | 231.53             | 0.29        | 0.22          | 2.50       | 0.30         | 1.79          | 5.09        | 53.05          | 3.26         | 7.84         | 14.25         | 52.14       | 54.05        |
| 55            | 198.34             | 0.41        | 0.09          | 2.26       | 0.27         | 1.76          | 4.18        | 46.06          | 3.27         | 8.98         | 14.01         | 45.19       | 47.31        |
| 60            | 179.11             | 0.51        | 0.07          | 2.82       | 0.14         | 1.54          | 3.17        | 43.54          | 3.18         | 9.98         | 15.54         | 42.24       | 45.01        |
| 65            | 128.64             | 0.39        | 0.16          | 1.09       | 0.36         | 2.57          | 1.15        | 34.74          | 3.02         | 16.89        | 20.15         | 33.24       | 38.87        |
| 70            | 93.70              | 0.90        | 0.55          | 1.62       | 2.03         | 3.13          | 4.05        | 34.10          | 3.04         | 22.81        | 26.93         | 31.64       | 41.55        |
| 74            | 50.34              | 1.51        | 1.05          | 3.76       | 3.97         | 6.58          | 8.71        | 34.81          | 3.07         | 34.84        | 38.99         | 32.66       | 50.87        |
| 80            | 11.70              | 1.44        | 1.05          | 4.22       | 3.86         | 10.31         | 9.26        | 25.77          | 1.84         | 44.37        | 48.03         | 23.59       | 53.51        |
| 84            | 3.78               | 0.49        | 0.40          | 1.14       | 1.10         | 8.00          | 3.20        | 7.55           | 0.51         | 30.15        | 31.57         | 6.83        | 32.30        |

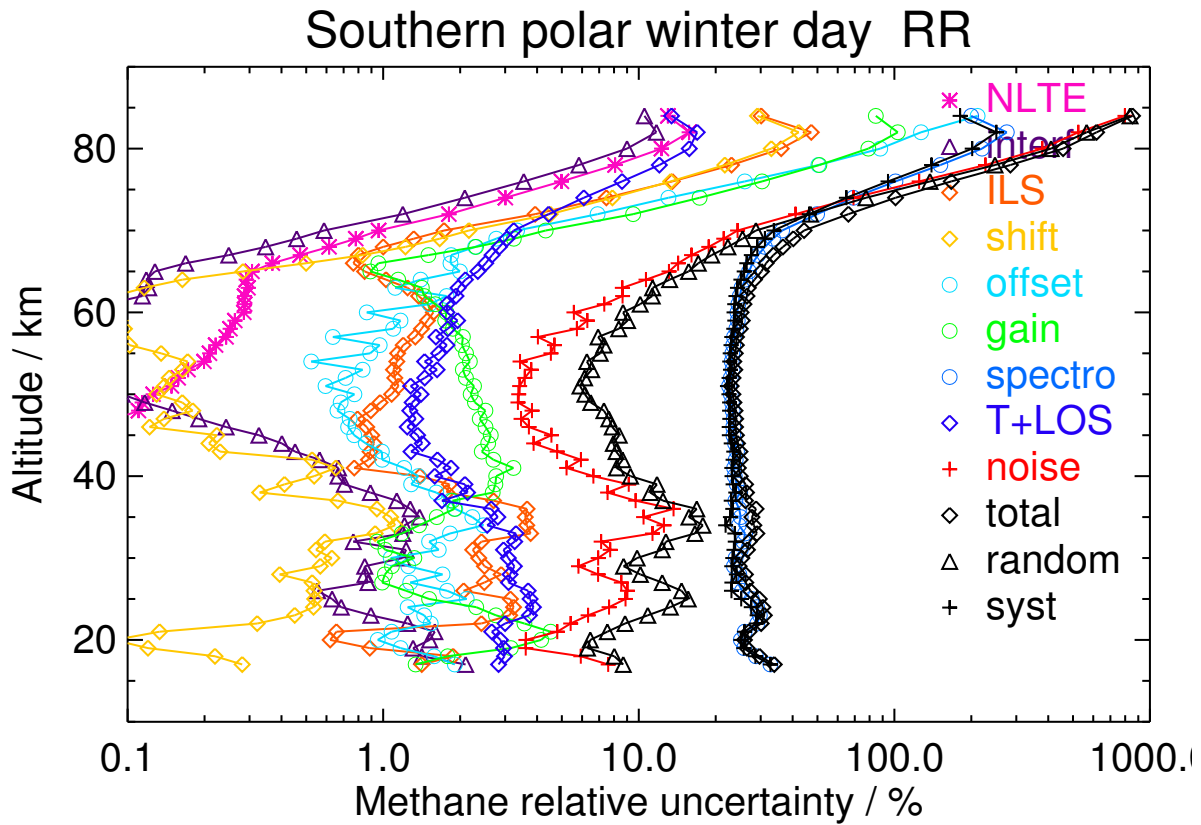

**Figure S95.** V8R\_CH4\_561 Southern polar winter day

**Table S96.** Methane error budget for Southern polar winter night. All uncertainties are  $1\sigma$ .

| altitude (km) | mean target (ppbv) | NLTE (ppbv) | interf (ppbv) | ILS (ppbv) | shift (ppbv) | offset (ppbv) | gain (ppbv) | spectro (ppbv) | T+LOS (ppbv) | noise (ppbv) | random (ppbv) | syst (ppbv) | total (ppbv) |
|---------------|--------------------|-------------|---------------|------------|--------------|---------------|-------------|----------------|--------------|--------------|---------------|-------------|--------------|
| 30            | 454.85             | 0.05        | 5.03          | 12.67      | 2.87         | 5.11          | 5.07        | 114.22         | 13.73        | 31.02        | 44.78         | 111.52      | 120.18       |
| 35            | 197.92             | 0.09        | 2.45          | 5.43       | 1.66         | 4.65          | 2.94        | 53.25          | 5.82         | 20.56        | 36.78         | 44.80       | 57.97        |
| 40            | 193.95             | 0.09        | 1.07          | 2.13       | 0.93         | 2.60          | 5.19        | 45.88          | 3.04         | 13.82        | 17.99         | 44.97       | 48.43        |
| 45            | 223.25             | 0.16        | 0.71          | 2.66       | 0.63         | 1.83          | 6.46        | 54.16          | 3.02         | 10.82        | 21.56         | 51.45       | 55.79        |
| 50            | 209.23             | 0.22        | 0.23          | 2.19       | 0.32         | 1.68          | 4.39        | 50.04          | 2.95         | 7.59         | 16.00         | 48.39       | 50.97        |
| 55            | 179.41             | 0.32        | 0.12          | 1.94       | 0.32         | 1.58          | 3.60        | 43.76          | 2.87         | 8.40         | 14.55         | 42.45       | 44.87        |
| 60            | 161.30             | 0.40        | 0.09          | 2.14       | 0.21         | 1.31          | 2.59        | 40.82          | 2.86         | 9.53         | 15.75         | 39.12       | 42.17        |
| 65            | 123.79             | 0.43        | 0.19          | 0.97       | 0.42         | 2.52          | 1.37        | 31.80          | 2.85         | 16.08        | 19.51         | 30.11       | 35.88        |
| 70            | 86.12              | 0.67        | 0.51          | 1.61       | 1.64         | 2.93          | 3.77        | 26.28          | 3.26         | 21.78        | 24.57         | 24.51       | 34.71        |
| 74            | 44.70              | 1.01        | 0.97          | 3.39       | 3.37         | 6.40          | 8.02        | 23.69          | 3.76         | 34.78        | 37.61         | 22.37       | 43.76        |
| 80            | 3.83               | 1.18        | 1.33          | 5.31       | 4.60         | 9.36          | 11.81       | 21.05          | 3.30         | 42.70        | 46.12         | 20.72       | 50.56        |
| 84            | -12.96             | 0.51        | 0.56          | 1.30       | 1.18         | 8.06          | 3.24        | 8.12           | 1.13         | 30.41        | 31.96         | 7.06        | 32.73        |

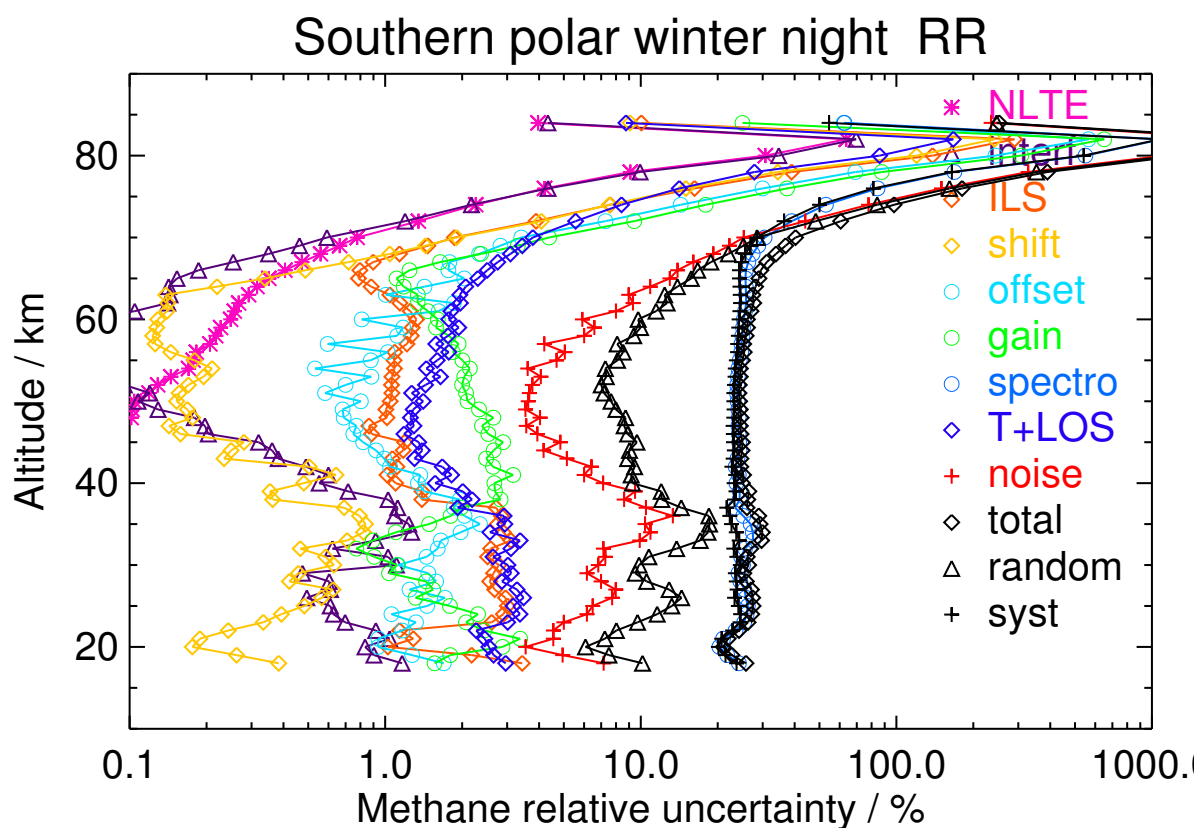

**Figure S96.** V8R\_CH4\_561 Southern polar winter night



**Table S97.** Methane error budget for Southern polar spring day. All uncertainties are  $1\sigma$ .

| altitude (km) | mean target (ppbv) | NLTE (ppbv) | interf (ppbv) | ILS (ppbv) | shift (ppbv) | offset (ppbv) | gain (ppbv) | spectro (ppbv) | T+LOS (ppbv) | noise (ppbv) | random (ppbv) | syst (ppbv) | total (ppbv) |
|---------------|--------------------|-------------|---------------|------------|--------------|---------------|-------------|----------------|--------------|--------------|---------------|-------------|--------------|
| 30            | 690.52             | 0.08        | 3.10          | 37.42      | 3.62         | 7.73          | 50.87       | 196.45         | 11.66        | 35.10        | 135.02        | 160.62      | 209.83       |
| 35            | 537.91             | 0.04        | 1.71          | 7.49       | 2.15         | 3.39          | 13.18       | 114.79         | 6.77         | 15.48        | 45.82         | 107.75      | 117.09       |
| 40            | 315.43             | 0.07        | 0.78          | 6.82       | 1.24         | 2.66          | 7.81        | 66.64          | 3.62         | 11.79        | 21.91         | 65.04       | 68.63        |
| 45            | 264.72             | 0.15        | 0.52          | 4.49       | 0.83         | 1.53          | 7.24        | 58.26          | 3.15         | 10.03        | 17.93         | 57.09       | 59.84        |
| 50            | 270.41             | 0.26        | 0.29          | 4.30       | 0.55         | 1.98          | 6.97        | 60.23          | 3.85         | 8.57         | 15.82         | 59.48       | 61.55        |
| 55            | 237.47             | 0.31        | 0.16          | 2.46       | 0.40         | 1.81          | 4.76        | 53.11          | 4.00         | 8.74         | 11.05         | 53.13       | 54.27        |
| 60            | 210.18             | 0.32        | 0.10          | 2.62       | 0.22         | 1.54          | 3.54        | 49.30          | 3.65         | 8.86         | 10.90         | 49.24       | 50.44        |
| 65            | 168.28             | 0.22        | 0.17          | 1.10       | 0.22         | 2.73          | 1.85        | 41.37          | 3.36         | 14.60        | 16.65         | 40.88       | 44.14        |
| 70            | 121.18             | 0.82        | 0.18          | 1.37       | 0.53         | 2.24          | 1.08        | 31.76          | 2.76         | 19.21        | 20.48         | 31.22       | 37.34        |
| 74            | 63.06              | 1.68        | 0.68          | 2.43       | 2.61         | 4.44          | 5.71        | 27.68          | 2.41         | 30.09        | 32.39         | 26.39       | 41.78        |
| 80            | 3.42               | 1.92        | 1.22          | 4.53       | 5.31         | 8.95          | 10.10       | 31.11          | 1.74         | 43.74        | 47.67         | 29.12       | 55.86        |
| 84            | -3.83              | 1.09        | 0.68          | 2.79       | 3.04         | 7.06          | 5.76        | 18.16          | 0.57         | 30.76        | 32.92         | 17.16       | 37.12        |

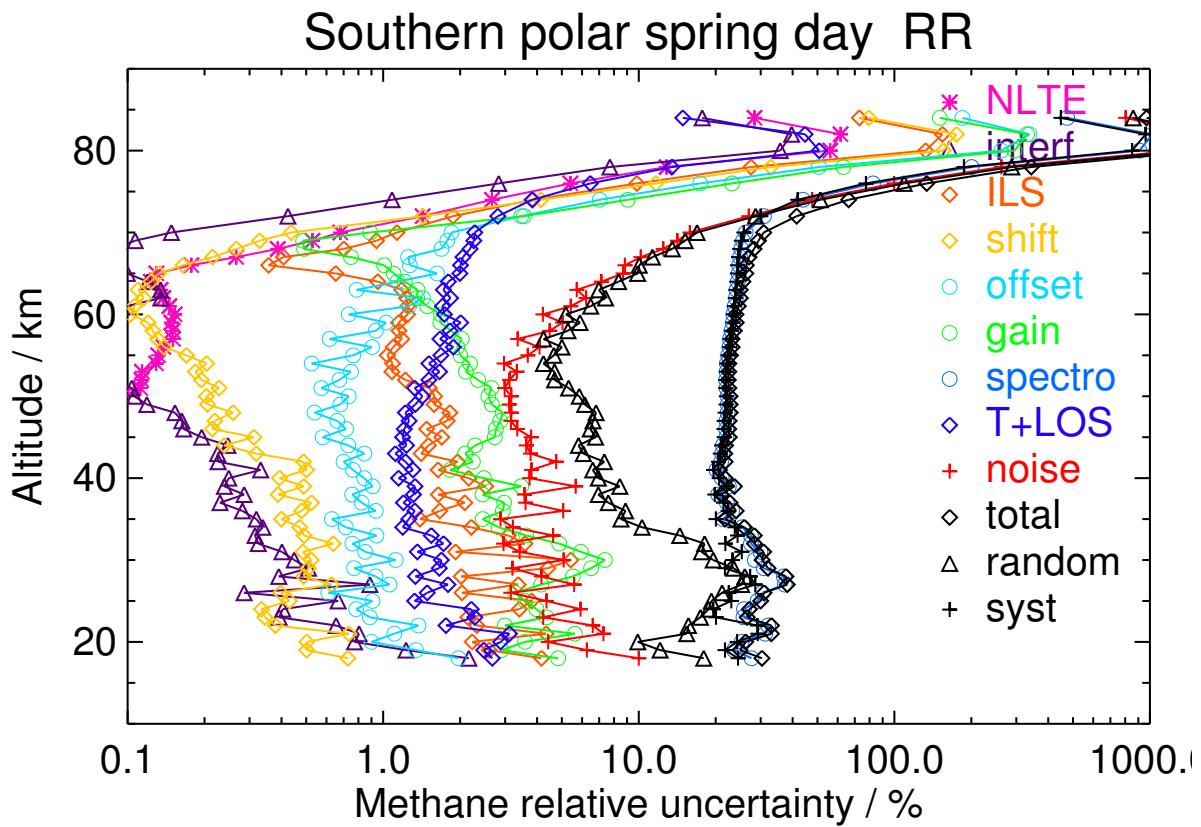

**Figure S97.** V8R\_CH4\_561 Southern polar spring day

**Table S98.** Methane error budget for Southern polar spring night. All uncertainties are  $1\sigma$ .

| altitude (km) | mean target (ppbv) | NLTE (ppbv) | interf (ppbv) | ILS (ppbv) | shift (ppbv) | offset (ppbv) | gain (ppbv) | spectro (ppbv) | T+LOS (ppbv) | noise (ppbv) | random (ppbv) | syst (ppbv) | total (ppbv) |
|---------------|--------------------|-------------|---------------|------------|--------------|---------------|-------------|----------------|--------------|--------------|---------------|-------------|--------------|
| 30            | 793.01             | 0.05        | 2.96          | 35.67      | 3.67         | 8.42          | 62.49       | 208.36         | 11.37        | 33.37        | 140.08        | 174.08      | 223.44       |
| 35            | 475.68             | 0.03        | 2.38          | 8.91       | 2.49         | 3.64          | 15.17       | 109.13         | 7.05         | 16.51        | 53.75         | 98.37       | 112.10       |
| 40            | 315.58             | 0.07        | 0.86          | 6.51       | 1.23         | 2.98          | 10.64       | 67.81          | 3.94         | 12.20        | 23.87         | 66.02       | 70.20        |
| 45            | 256.54             | 0.10        | 0.64          | 3.14       | 0.56         | 1.52          | 6.66        | 56.96          | 3.05         | 10.11        | 14.70         | 56.54       | 58.42        |
| 50            | 264.53             | 0.16        | 0.32          | 2.38       | 0.38         | 1.81          | 5.38        | 58.58          | 3.66         | 8.47         | 12.12         | 58.38       | 59.62        |
| 55            | 245.93             | 0.20        | 0.16          | 2.11       | 0.36         | 2.10          | 4.85        | 55.26          | 4.55         | 10.15        | 12.46         | 55.27       | 56.66        |
| 60            | 214.53             | 0.17        | 0.12          | 2.54       | 0.20         | 1.77          | 3.49        | 50.58          | 4.11         | 10.06        | 12.26         | 50.48       | 51.94        |
| 65            | 171.45             | 0.27        | 0.20          | 1.13       | 0.24         | 2.57          | 1.61        | 41.28          | 3.84         | 15.31        | 16.83         | 40.99       | 44.32        |
| 70            | 105.10             | 0.79        | 0.31          | 1.23       | 0.65         | 2.26          | 2.29        | 29.40          | 3.43         | 20.45        | 21.91         | 28.77       | 36.16        |
| 74            | 46.64              | 1.26        | 0.77          | 2.61       | 2.05         | 5.18          | 7.50        | 26.86          | 3.43         | 31.41        | 33.79         | 25.97       | 42.62        |
| 80            | 0.24               | 1.33        | 1.22          | 5.02       | 3.64         | 9.67          | 10.80       | 30.33          | 2.54         | 44.56        | 48.04         | 29.25       | 56.25        |
| 84            | -5.88              | 0.74        | 0.73          | 3.02       | 2.22         | 7.27          | 6.17        | 17.91          | 0.92         | 30.34        | 32.42         | 17.25       | 36.72        |

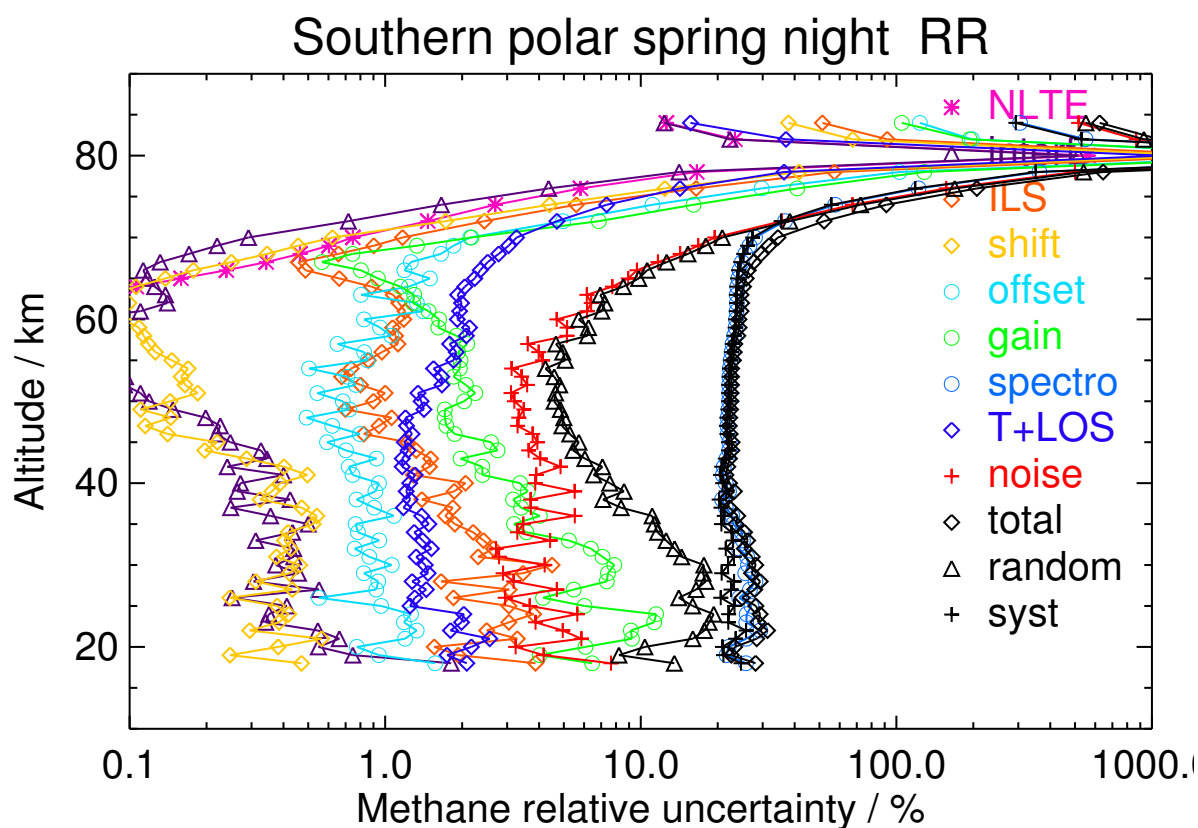

**Figure S98.** V8R\_CH4\_561 Southern polar spring night

**Table S99.** Methane error budget for Southern polar summer day. All uncertainties are  $1\sigma$ .

| altitude<br>(km) | mean target<br>(ppbv) | NLTE<br>(ppbv) | interf<br>(ppbv) | ILS<br>(ppbv) | shift<br>(ppbv) | offset<br>(ppbv) | gain<br>(ppbv) | spectro<br>(ppbv) | T+LOS<br>(ppbv) | noise<br>(ppbv) | random<br>(ppbv) | syst<br>(ppbv) | total<br>(ppbv) |
|------------------|-----------------------|----------------|------------------|---------------|-----------------|------------------|----------------|-------------------|-----------------|-----------------|------------------|----------------|-----------------|
| 30               | 930.86                | 0.03           | 1.91             | 43.32         | 1.16            | 8.75             | 49.44          | 252.44            | 19.74           | 33.07           | 54.52            | 258.14         | 263.84          |
| 35               | 648.39                | 0.06           | 1.26             | 5.59          | 0.96            | 3.88             | 10.33          | 139.62            | 9.24            | 18.02           | 26.49            | 139.13         | 141.63          |
| 40               | 405.07                | 0.11           | 0.98             | 4.83          | 1.34            | 3.00             | 9.46           | 79.31             | 3.65            | 17.14           | 23.18            | 78.64          | 81.98           |
| 45               | 179.60                | 0.12           | 0.56             | 4.69          | 0.79            | 2.32             | 6.08           | 38.95             | 2.77            | 15.74           | 19.59            | 38.13          | 42.87           |
| 50               | 82.79                 | 0.03           | 0.10             | 0.71          | 0.17            | 1.12             | 0.88           | 20.31             | 0.90            | 6.74            | 8.83             | 19.58          | 21.48           |
| 55               | 74.53                 | 0.06           | 0.09             | 0.65          | 0.20            | 1.01             | 1.05           | 17.51             | 0.93            | 4.50            | 6.65             | 16.91          | 18.17           |
| 60               | 97.80                 | 0.13           | 0.06             | 1.16          | 0.17            | 1.08             | 1.53           | 23.66             | 1.19            | 4.94            | 8.48             | 22.77          | 24.30           |
| 65               | 108.63                | 0.15           | 0.16             | 1.12          | 0.17            | 2.25             | 1.34           | 27.07             | 1.68            | 9.92            | 12.39            | 26.25          | 29.02           |
| 70               | 110.32                | 0.31           | 0.12             | 1.30          | 0.43            | 2.05             | 1.15           | 27.77             | 1.51            | 14.87           | 16.82            | 26.82          | 31.66           |
| 74               | 102.10                | 1.44           | 0.68             | 2.51          | 1.34            | 3.39             | 3.83           | 32.09             | 1.01            | 25.69           | 27.98            | 30.73          | 41.56           |
| 80               | 79.70                 | 3.11           | 1.88             | 3.91          | 6.71            | 6.69             | 9.19           | 48.31             | 0.42            | 38.79           | 42.17            | 47.57          | 63.57           |
| 84               | 52.74                 | 2.29           | 1.28             | 4.98          | 5.53            | 6.21             | 5.66           | 32.67             | 0.39            | 31.92           | 34.07            | 32.53          | 47.11           |

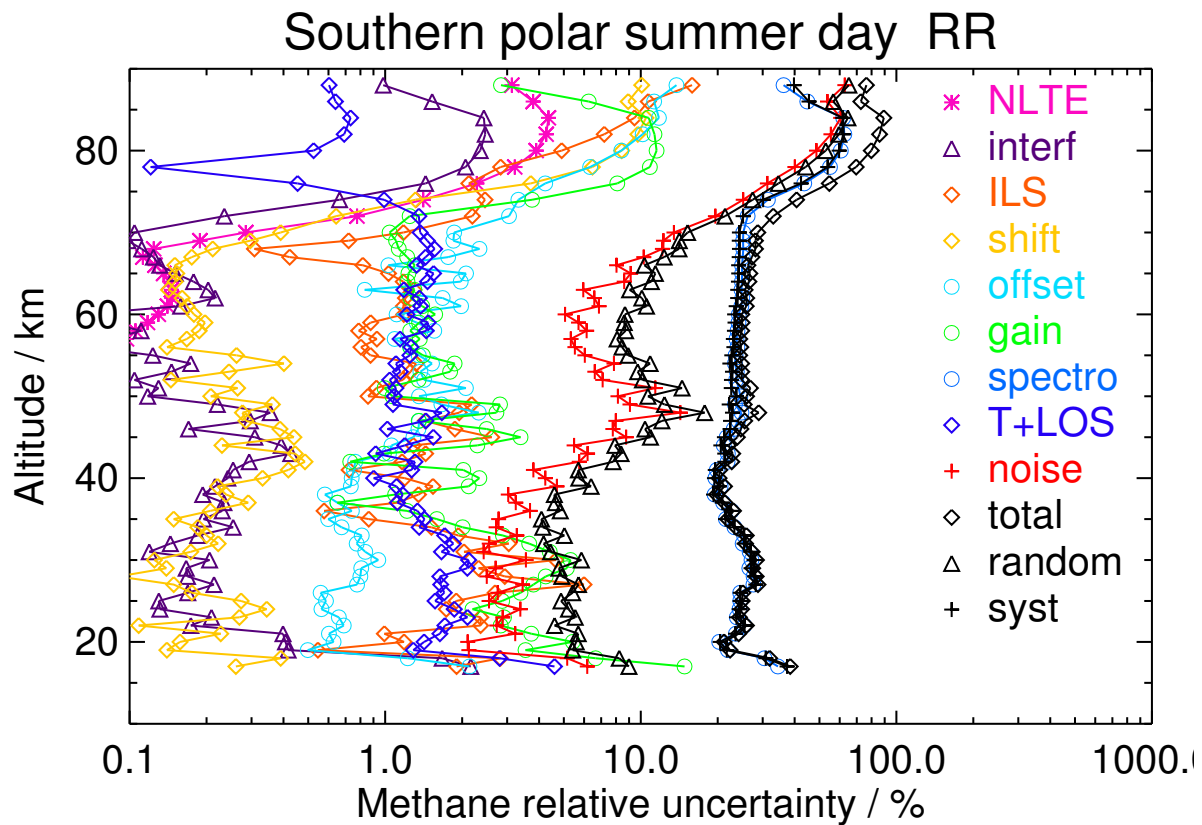**Figure S99.** V8R\_CH4\_561 Southern polar summer day

**Table S100.** Methane error budget for Southern polar summer night. All uncertainties are  $1\sigma$ .

| altitude (km) | mean target (ppbv) | NLTE (ppbv) | interf (ppbv) | ILS (ppbv) | shift (ppbv) | offset (ppbv) | gain (ppbv) | spectro (ppbv) | T+LOS (ppbv) | noise (ppbv) | random (ppbv) | syst (ppbv) | total (ppbv) |
|---------------|--------------------|-------------|---------------|------------|--------------|---------------|-------------|----------------|--------------|--------------|---------------|-------------|--------------|
| 30            | 855.21             | <0.01       | 4.20          | 26.23      | 1.66         | 9.32          | 51.51       | 227.79         | 21.11        | 32.63        | 49.53         | 233.22      | 238.42       |
| 35            | 548.37             | 0.02        | 2.04          | 3.15       | 1.03         | 4.52          | 13.25       | 123.07         | 9.22         | 18.45        | 27.93         | 122.48      | 125.63       |
| 40            | 240.44             | 0.04        | 2.23          | 2.52       | 1.19         | 3.17          | 3.41        | 51.79          | 2.84         | 17.49        | 22.40         | 50.30       | 55.06        |
| 45            | 83.82              | 0.05        | 1.13          | 2.22       | 0.39         | 2.55          | 2.77        | 22.50          | 1.66         | 16.14        | 19.69         | 20.05       | 28.11        |
| 50            | 55.44              | 0.03        | 0.20          | 1.05       | 0.11         | 1.28          | 1.12        | 13.40          | 0.69         | 6.46         | 7.43          | 13.07       | 15.03        |
| 55            | 73.82              | 0.06        | 0.11          | 0.55       | 0.11         | 1.34          | 1.03        | 17.79          | 1.22         | 5.94         | 7.95          | 17.12       | 18.88        |
| 60            | 92.28              | 0.12        | 0.09          | 1.06       | 0.10         | 1.44          | 1.49        | 23.19          | 1.58         | 7.41         | 10.13         | 22.32       | 24.51        |
| 65            | 137.04             | 0.13        | 0.23          | 0.78       | 0.18         | 2.51          | 1.60        | 32.82          | 2.69         | 13.38        | 15.26         | 32.25       | 35.68        |
| 70            | 128.41             | 0.39        | 0.56          | 1.07       | 0.64         | 2.65          | 1.17        | 32.63          | 2.95         | 19.43        | 20.69         | 32.14       | 38.23        |
| 74            | 91.87              | 1.16        | 2.13          | 1.65       | 2.81         | 4.67          | 8.12        | 39.62          | 2.24         | 30.12        | 32.43         | 39.18       | 50.86        |
| 80            | 32.95              | 1.46        | 2.68          | 2.19       | 4.64         | 8.86          | 11.67       | 45.65          | 0.31         | 44.37        | 46.75         | 46.01       | 65.59        |
| 84            | 4.07               | 0.77        | 1.58          | 1.85       | 3.06         | 6.34          | 7.37        | 28.40          | 0.03         | 28.98        | 30.64         | 28.61       | 41.92        |

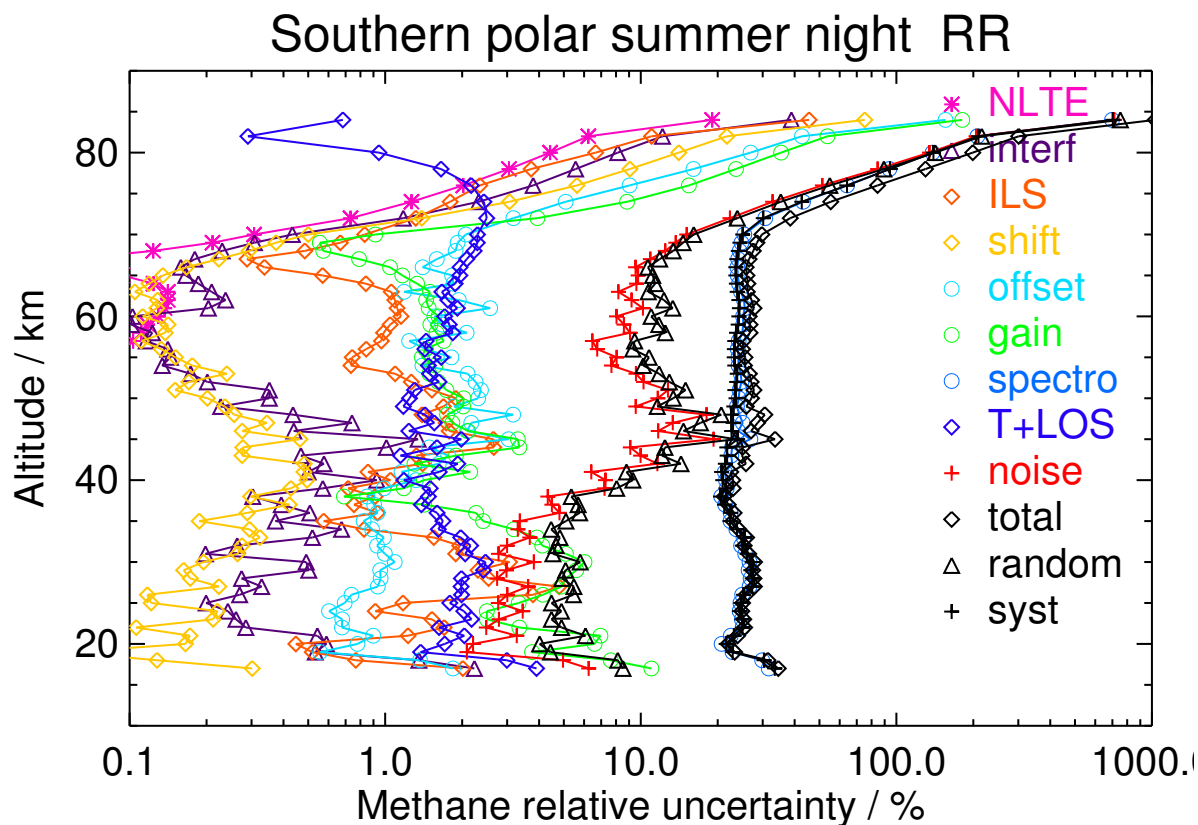

**Figure S100.** V8R\_CH4\_561 Southern polar summer night

**Table S101.** Methane error budget for Southern polar autumn day. All uncertainties are  $1\sigma$ .

| altitude (km) | mean target (ppbv) | NLTE (ppbv) | interf (ppbv) | ILS (ppbv) | shift (ppbv) | offset (ppbv) | gain (ppbv) | spectro (ppbv) | T+LOS (ppbv) | noise (ppbv) | random (ppbv) | syst (ppbv) | total (ppbv) |
|---------------|--------------------|-------------|---------------|------------|--------------|---------------|-------------|----------------|--------------|--------------|---------------|-------------|--------------|
| 30            | 707.93             | 0.08        | 1.53          | 9.72       | 1.19         | 5.44          | 26.58       | 178.83         | 18.00        | 30.43        | 50.07         | 177.65      | 184.57       |
| 35            | 289.81             | 0.06        | 1.49          | 4.66       | 0.81         | 4.59          | 5.37        | 77.26          | 8.06         | 19.86        | 36.09         | 72.11       | 80.64        |
| 40            | 82.49              | 0.05        | 0.52          | 1.86       | 0.36         | 2.29          | 2.96        | 21.14          | 2.07         | 13.24        | 16.70         | 19.11       | 25.38        |
| 45            | 76.27              | 0.10        | 0.28          | 0.81       | 0.38         | 1.29          | 2.40        | 19.59          | 1.93         | 9.80         | 13.49         | 17.61       | 22.18        |
| 50            | 178.13             | 0.32        | 0.18          | 1.54       | 0.12         | 2.40          | 3.74        | 40.88          | 3.36         | 10.40        | 15.70         | 39.58       | 42.58        |
| 55            | 210.81             | 0.55        | 0.09          | 2.34       | 0.13         | 1.80          | 4.34        | 48.06          | 3.71         | 9.60         | 13.77         | 47.47       | 49.43        |
| 60            | 153.02             | 0.52        | 0.05          | 2.55       | 0.07         | 1.27          | 2.80        | 37.54          | 3.13         | 10.68        | 14.29         | 36.68       | 39.37        |
| 65            | 84.87              | 0.36        | 0.12          | 1.30       | 0.14         | 2.37          | 1.26        | 23.42          | 1.98         | 16.11        | 18.48         | 21.90       | 28.66        |
| 70            | 53.41              | 0.16        | 0.18          | 0.43       | 0.51         | 2.83          | 0.59        | 17.34          | 1.71         | 21.28        | 22.47         | 16.14       | 27.67        |
| 74            | 23.50              | 0.21        | 0.30          | 0.50       | 0.92         | 6.59          | 0.99        | 14.70          | 1.63         | 33.82        | 34.95         | 13.65       | 37.52        |
| 80            | -8.41              | 0.41        | 0.44          | 0.68       | 1.37         | 10.37         | 1.76        | 12.45          | 1.29         | 44.30        | 45.85         | 11.41       | 47.24        |
| 84            | -0.15              | 0.31        | 0.28          | 0.34       | 0.91         | 7.34          | 1.39        | 7.91           | 0.63         | 29.00        | 30.12         | 7.33        | 31.00        |

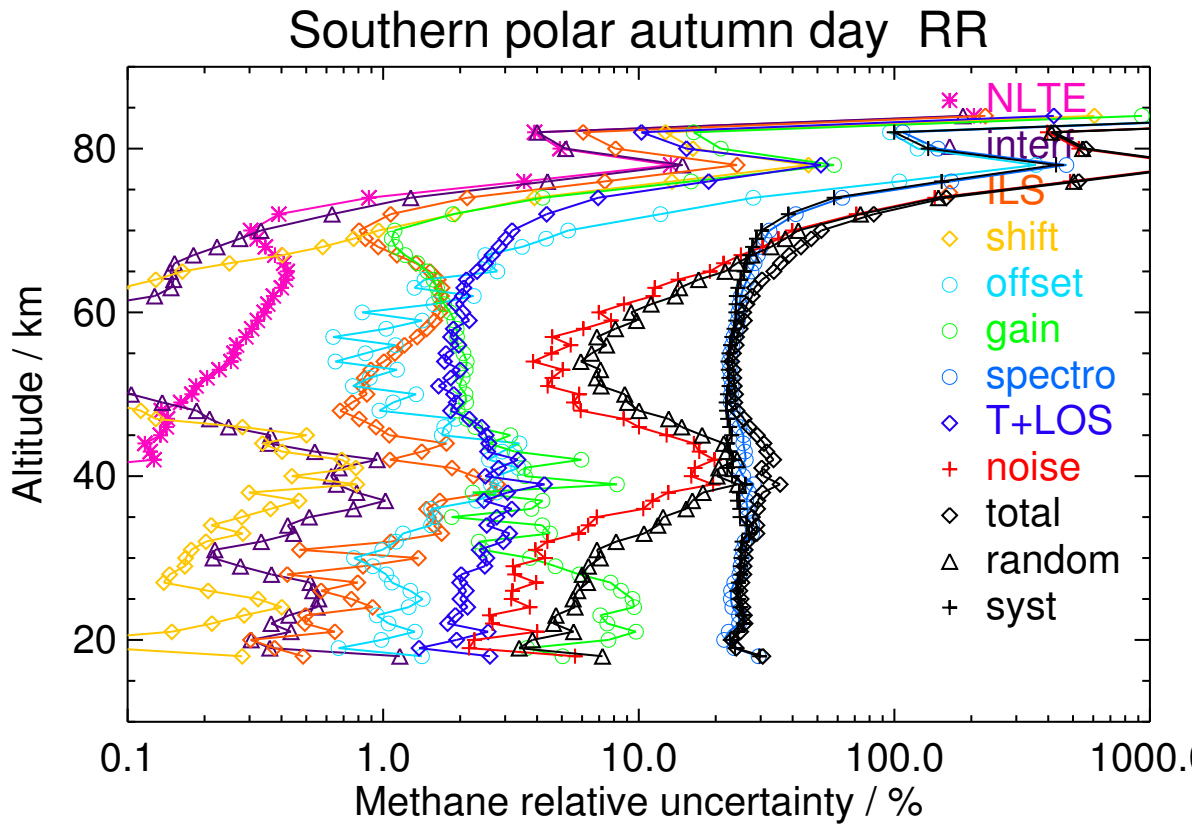

**Figure S101.** V8R\_CH4\_561 Southern polar autumn day

**Table S102.** Methane error budget for Southern polar autumn night. All uncertainties are  $1\sigma$ .

| altitude (km) | mean target (ppbv) | NLTE (ppbv) | interf (ppbv) | ILS (ppbv) | shift (ppbv) | offset (ppbv) | gain (ppbv) | spectro (ppbv) | T+LOS (ppbv) | noise (ppbv) | random (ppbv) | syst (ppbv) | total (ppbv) |
|---------------|--------------------|-------------|---------------|------------|--------------|---------------|-------------|----------------|--------------|--------------|---------------|-------------|--------------|
| 30            | 645.79             | 0.06        | 2.49          | 7.61       | 1.13         | 5.29          | 17.55       | 173.23         | 18.61        | 30.79        | 48.14         | 171.43      | 178.06       |
| 35            | 222.66             | 0.06        | 1.40          | 4.33       | 0.87         | 4.25          | 5.45        | 58.62          | 6.74         | 18.55        | 32.28         | 53.41       | 62.41        |
| 40            | 66.43              | 0.04        | 0.47          | 1.29       | 0.31         | 2.27          | 2.50        | 16.89          | 1.88         | 12.79        | 15.87         | 14.63       | 21.58        |
| 45            | 103.21             | 0.08        | 0.29          | 0.79       | 0.38         | 1.24          | 1.73        | 24.75          | 2.19         | 9.59         | 12.97         | 23.38       | 26.74        |
| 50            | 182.78             | 0.24        | 0.21          | 1.30       | 0.15         | 2.36          | 3.56        | 42.45          | 3.43         | 10.43        | 14.49         | 41.63       | 44.08        |
| 55            | 198.54             | 0.43        | 0.09          | 2.21       | 0.13         | 1.71          | 4.17        | 47.19          | 3.69         | 9.90         | 14.96         | 46.27       | 48.63        |
| 60            | 131.47             | 0.41        | 0.06          | 2.13       | 0.07         | 1.22          | 2.47        | 33.90          | 2.88         | 10.56        | 15.89         | 32.08       | 35.80        |
| 65            | 60.97              | 0.26        | 0.14          | 1.02       | 0.13         | 2.29          | 0.82        | 18.13          | 1.69         | 16.05        | 18.38         | 16.08       | 24.42        |
| 70            | 33.33              | 0.20        | 0.17          | 0.33       | 0.34         | 2.91          | 0.77        | 11.14          | 1.37         | 20.86        | 21.78         | 9.80        | 23.88        |
| 74            | 17.04              | 0.26        | 0.45          | 0.51       | 0.99         | 6.80          | 2.55        | 10.56          | 1.86         | 34.61        | 35.82         | 9.16        | 36.97        |
| 80            | -1.16              | 0.46        | 0.82          | 1.09       | 1.88         | 9.83          | 4.74        | 11.34          | 2.22         | 43.34        | 45.11         | 10.07       | 46.22        |
| 84            | 38.62              | 0.16        | 0.79          | 0.20       | 0.80         | 7.20          | 4.36        | 7.38           | 1.45         | 28.87        | 29.82         | 8.53        | 31.02        |

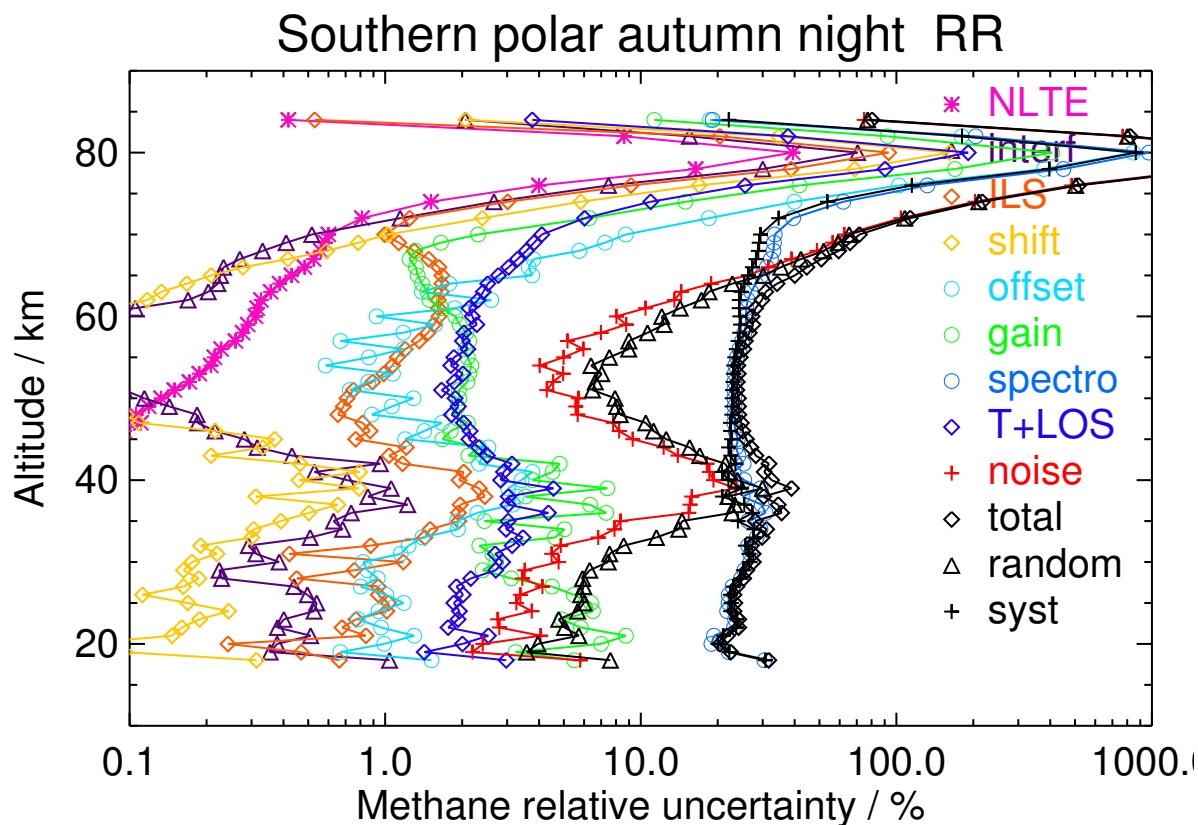

**Figure S102.** V8R\_CH4\_561 Southern polar autumn night

**S5 Methane error contribution profile plots and  
tabulated values for RR UA data (V8R\_CH4\_662)**



**Table S103.** Methane error budget for Northern polar winter day. All uncertainties are  $1\sigma$ .

| altitude (km) | mean target (ppbv) | NLTE (ppbv) | interf (ppbv) | ILS (ppbv) | shift (ppbv) | offset (ppbv) | gain (ppbv) | spectro (ppbv) | T+LOS (ppbv) | noise (ppbv) | random (ppbv) | syst (ppbv) | total (ppbv) |
|---------------|--------------------|-------------|---------------|------------|--------------|---------------|-------------|----------------|--------------|--------------|---------------|-------------|--------------|
| 40            | 350.53             | 0.21        | 0.42          | 6.17       | 0.20         | 5.64          | 13.64       | 70.58          | 7.32         | 29.21        | 32.23         | 71.46       | 78.39        |
| 45            | 221.62             | 0.27        | 0.07          | 2.56       | 0.22         | 2.10          | 7.51        | 43.80          | 4.13         | 13.19        | 14.94         | 44.20       | 46.66        |
| 50            | 148.63             | 0.31        | 0.03          | 0.86       | 0.10         | 1.61          | 3.74        | 32.40          | 2.86         | 10.72        | 11.58         | 32.50       | 34.50        |
| 55            | 107.75             | 0.30        | 0.03          | 1.00       | 0.05         | 1.44          | 2.30        | 26.59          | 2.43         | 10.84        | 13.14         | 25.81       | 28.96        |
| 60            | 41.24              | 0.15        | <0.01         | 0.76       | 0.02         | 1.14          | 0.79        | 12.02          | 0.98         | 7.49         | 9.55          | 10.63       | 14.29        |
| 65            | 20.45              | 0.09        | 0.02          | 0.44       | 0.02         | 1.36          | 0.30        | 5.96           | 0.47         | 7.14         | 7.78          | 5.32        | 9.43         |
| 70            | 14.35              | 0.09        | 0.01          | 0.28       | 0.02         | 1.76          | 0.17        | 3.88           | 0.31         | 8.08         | 8.37          | 3.67        | 9.14         |
| 74            | 16.11              | 0.25        | 0.02          | 0.30       | 0.03         | 3.48          | 0.19        | 4.35           | 0.31         | 15.94        | 16.46         | 3.80        | 16.89        |
| 80            | 24.12              | 0.74        | 0.02          | 0.44       | 0.04         | 6.22          | 0.29        | 6.08           | 0.37         | 28.24        | 29.17         | 4.82        | 29.56        |

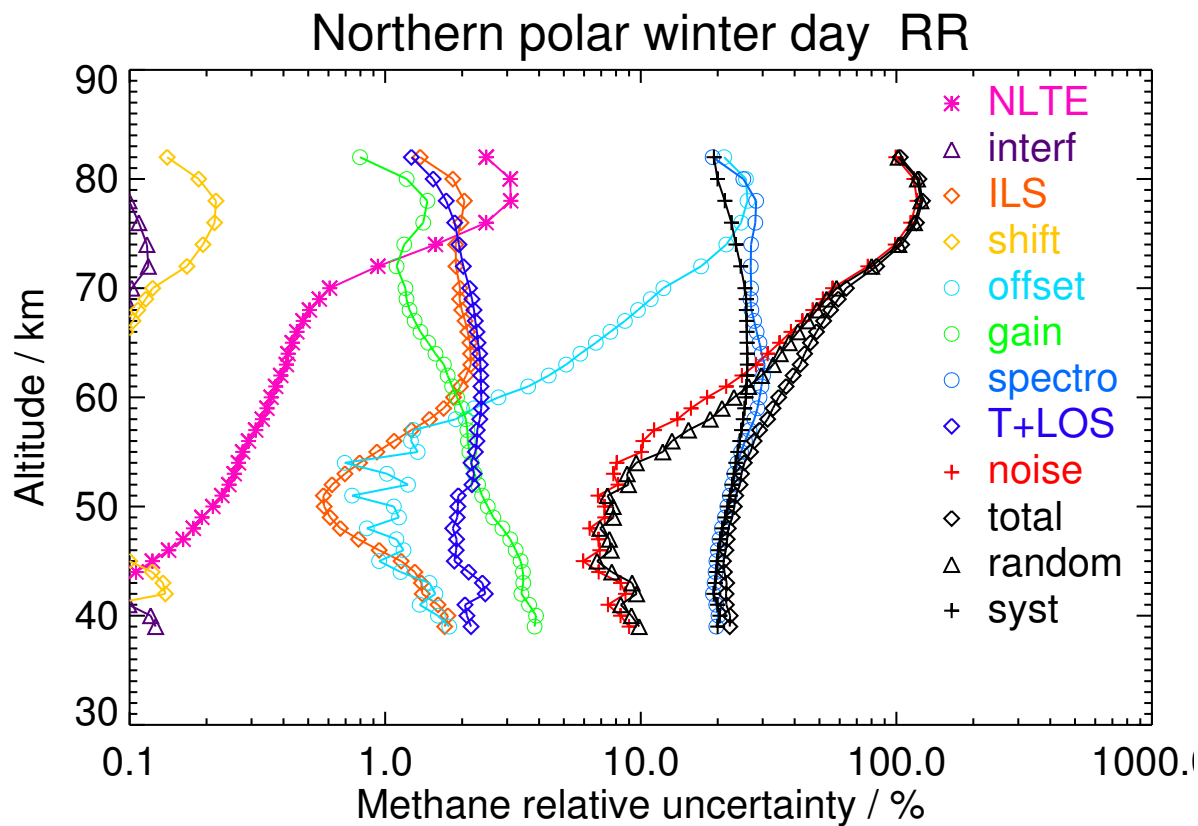

**Figure S103.** V8R\_CH4\_662 Northern polar winter day

**Table S104.** Methane error budget for Northern polar winter night. All uncertainties are  $1\sigma$ .

| altitude (km) | mean target (ppbv) | NLTE (ppbv) | interf (ppbv) | ILS (ppbv) | shift (ppbv) | offset (ppbv) | gain (ppbv) | spectro (ppbv) | T+LOS (ppbv) | noise (ppbv) | random (ppbv) | syst (ppbv) | total (ppbv) |
|---------------|--------------------|-------------|---------------|------------|--------------|---------------|-------------|----------------|--------------|--------------|---------------|-------------|--------------|
| 45            | 138.23             | 0.13        | 0.03          | 1.96       | 0.23         | 0.88          | 4.24        | 32.05          | 1.81         | 4.71         | 6.08          | 32.22       | 32.79        |
| 50            | 138.40             | 0.17        | 0.04          | 1.22       | 0.17         | 1.03          | 2.56        | 32.90          | 1.92         | 6.35         | 7.91          | 32.75       | 33.70        |
| 55            | 119.72             | 0.28        | 0.02          | 1.50       | 0.11         | 1.40          | 2.09        | 28.71          | 2.06         | 8.35         | 9.53          | 28.57       | 30.11        |
| 60            | 83.15              | 0.32        | 0.01          | 1.67       | 0.08         | 1.16          | 1.35        | 20.58          | 1.51         | 8.31         | 9.53          | 20.25       | 22.38        |
| 65            | 56.87              | 0.36        | 0.04          | 1.29       | 0.08         | 1.63          | 0.77        | 14.79          | 1.16         | 11.38        | 12.42         | 14.16       | 18.84        |
| 70            | 35.19              | 0.28        | 0.06          | 0.52       | 0.15         | 2.70          | 0.26        | 10.03          | 0.95         | 15.85        | 16.58         | 9.25        | 18.98        |
| 74            | 28.11              | 0.29        | 0.15          | 0.51       | 0.50         | 4.07          | 1.63        | 12.41          | 1.06         | 23.95        | 26.02         | 8.46        | 27.36        |
| 80            | 158.00             | 3.39        | 0.53          | 1.49       | 2.31         | 22.92         | 4.48        | 74.26          | 8.96         | 139.51       | 151.14        | 52.72       | 160.07       |

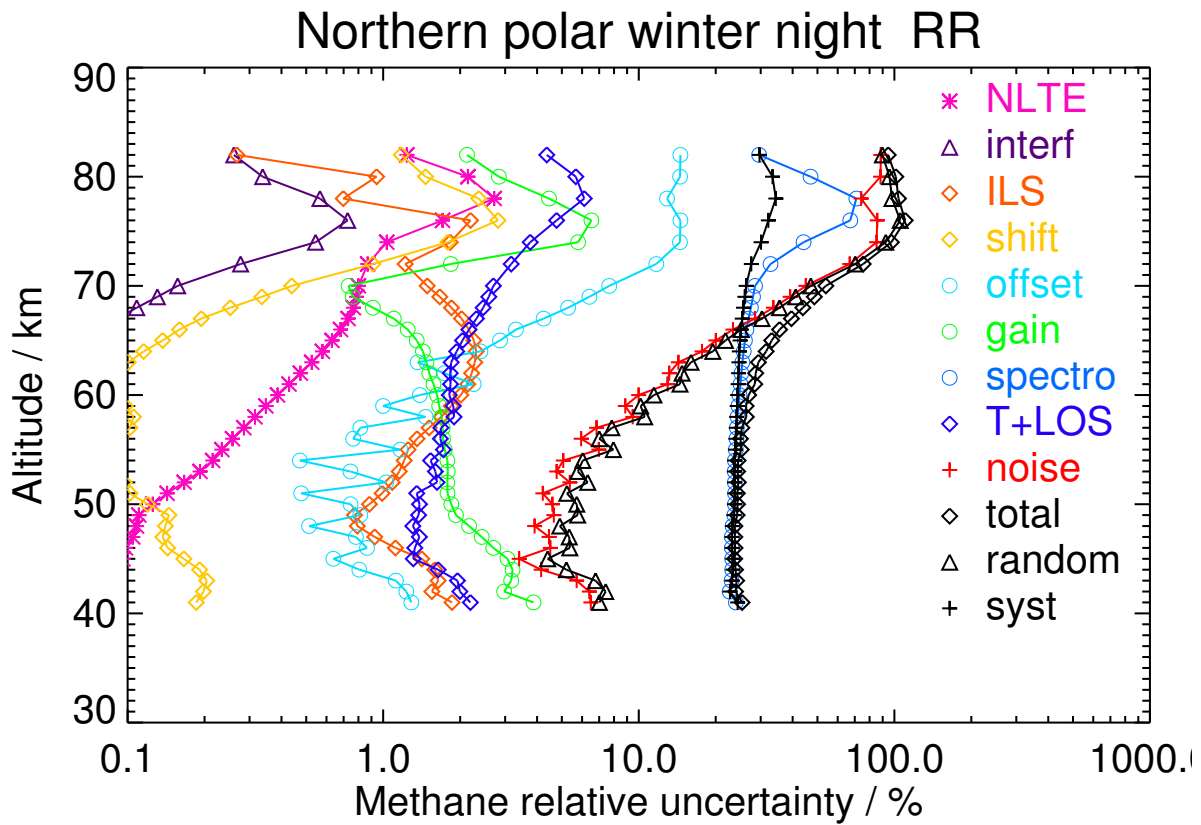

**Figure S104.** V8R\_CH4\_662 Northern polar winter night

**Table S105.** Methane error budget for Northern polar spring day. All uncertainties are  $1\sigma$ .

| altitude (km) | mean target (ppbv) | NLTE (ppbv) | interf (ppbv) | ILS (ppbv) | shift (ppbv) | offset (ppbv) | gain (ppbv) | spectro (ppbv) | T+LOS (ppbv) | noise (ppbv) | random (ppbv) | syst (ppbv) | total (ppbv) |
|---------------|--------------------|-------------|---------------|------------|--------------|---------------|-------------|----------------|--------------|--------------|---------------|-------------|--------------|
| 45            | 153.86             | 0.12        | 0.08          | 3.23       | 0.24         | 0.77          | 5.17        | 38.12          | 1.29         | 3.82         | 13.66         | 36.34       | 38.82        |
| 50            | 117.62             | 0.15        | 0.05          | 1.43       | 0.17         | 0.69          | 2.55        | 30.42          | 1.35         | 3.81         | 13.84         | 27.56       | 30.84        |
| 55            | 120.39             | 0.25        | 0.05          | 2.16       | 0.17         | 1.33          | 2.94        | 29.17          | 2.02         | 5.93         | 10.74         | 28.10       | 30.08        |
| 60            | 92.61              | 0.28        | 0.05          | 2.68       | 0.14         | 1.52          | 2.39        | 23.46          | 1.61         | 6.85         | 11.23         | 22.11       | 24.80        |
| 65            | 65.26              | 0.17        | 0.03          | 2.06       | 0.08         | 1.24          | 0.98        | 17.19          | 1.27         | 9.88         | 11.79         | 16.20       | 20.04        |
| 70            | 36.29              | 0.13        | 0.11          | 0.53       | 0.28         | 1.80          | 1.18        | 10.47          | 0.88         | 13.75        | 14.44         | 9.80        | 17.45        |
| 74            | 35.05              | 0.89        | 0.42          | 2.84       | 1.20         | 3.40          | 5.38        | 16.52          | 1.46         | 24.69        | 27.92         | 12.48       | 30.59        |
| 80            | 46.79              | 1.56        | 0.79          | 5.33       | 2.36         | 7.49          | 9.31        | 22.53          | 1.62         | 50.23        | 53.14         | 19.73       | 56.69        |
| 84            | 43.76              | 1.03        | 0.56          | 3.29       | 1.68         | 6.30          | 5.59        | 15.85          | 0.69         | 35.83        | 36.45         | 17.12       | 40.27        |

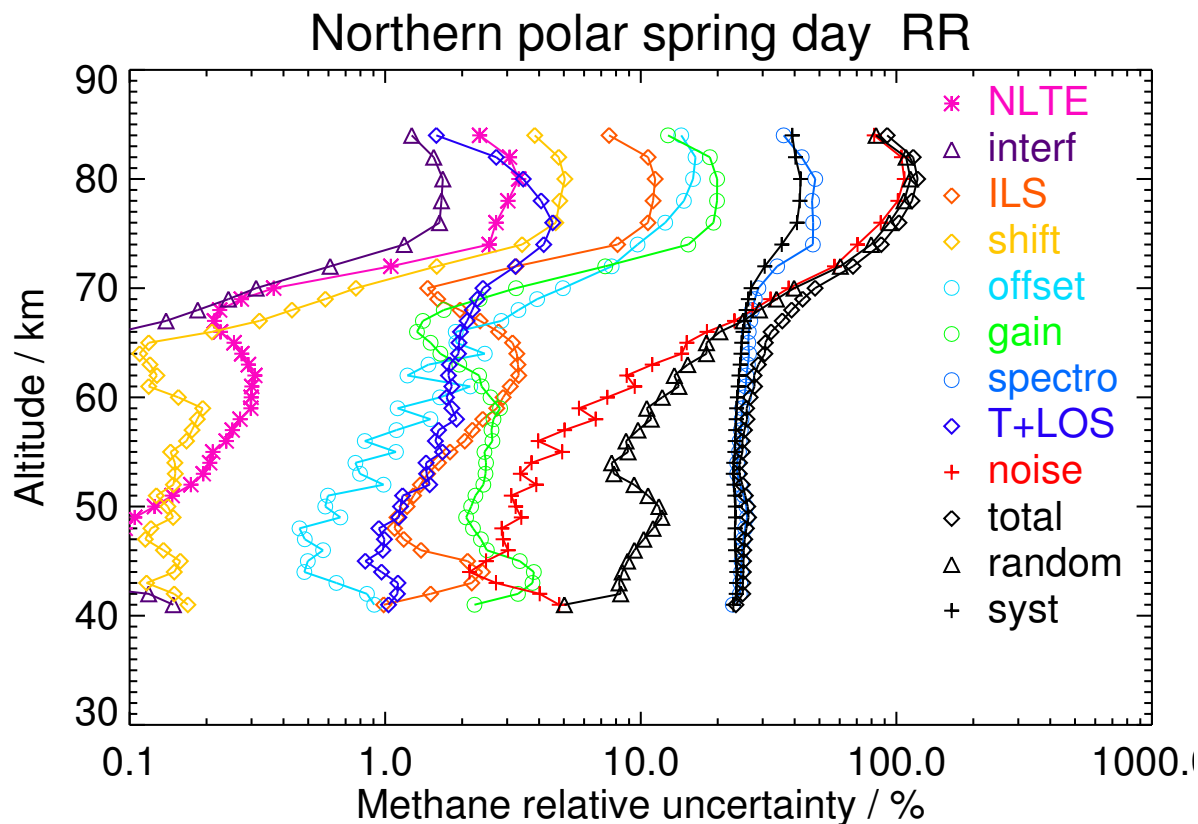

**Figure S105.** V8R\_CH4\_662 Northern polar spring day

**Table S106.** Methane error budget for Northern polar spring night. All uncertainties are  $1\sigma$ .

| altitude (km) | mean target (ppbv) | NLTE (ppbv) | interf (ppbv) | ILS (ppbv) | shift (ppbv) | offset (ppbv) | gain (ppbv) | spectro (ppbv) | T+LOS (ppbv) | noise (ppbv) | random (ppbv) | syst (ppbv) | total (ppbv) |
|---------------|--------------------|-------------|---------------|------------|--------------|---------------|-------------|----------------|--------------|--------------|---------------|-------------|--------------|
| 40            | 280.72             | 0.09        | 0.31          | 5.13       | 0.40         | 2.30          | 9.70        | 65.58          | 3.18         | 9.40         | 10.36         | 66.47       | 67.27        |
| 45            | 176.42             | 0.09        | 0.08          | 3.37       | 0.27         | 0.93          | 5.54        | 42.55          | 1.62         | 5.02         | 11.75         | 41.75       | 43.37        |
| 50            | 150.29             | 0.10        | 0.15          | 1.50       | 0.24         | 0.79          | 2.28        | 39.56          | 1.89         | 5.40         | 19.38         | 35.07       | 40.07        |
| 55            | 114.72             | 0.22        | 0.07          | 2.39       | 0.21         | 1.33          | 3.33        | 28.31          | 2.10         | 6.16         | 13.26         | 26.20       | 29.37        |
| 60            | 67.86              | 0.15        | 0.04          | 1.98       | 0.10         | 1.06          | 1.62        | 17.31          | 1.23         | 6.25         | 9.35          | 16.14       | 18.65        |
| 65            | 39.62              | 0.08        | 0.05          | 1.06       | 0.09         | 1.09          | 0.41        | 10.97          | 0.76         | 8.00         | 9.39          | 9.96        | 13.69        |
| 70            | 25.57              | 0.08        | 0.11          | 0.40       | 0.29         | 1.63          | 1.19        | 8.56           | 0.72         | 10.84        | 11.86         | 7.42        | 13.99        |
| 74            | 23.39              | 0.32        | 0.26          | 1.61       | 0.72         | 3.09          | 3.22        | 10.51          | 1.12         | 20.03        | 21.46         | 8.70        | 23.16        |
| 80            | 28.20              | 0.75        | 0.48          | 3.14       | 1.30         | 5.06          | 5.47        | 12.83          | 1.05         | 31.78        | 33.78         | 10.13       | 35.27        |

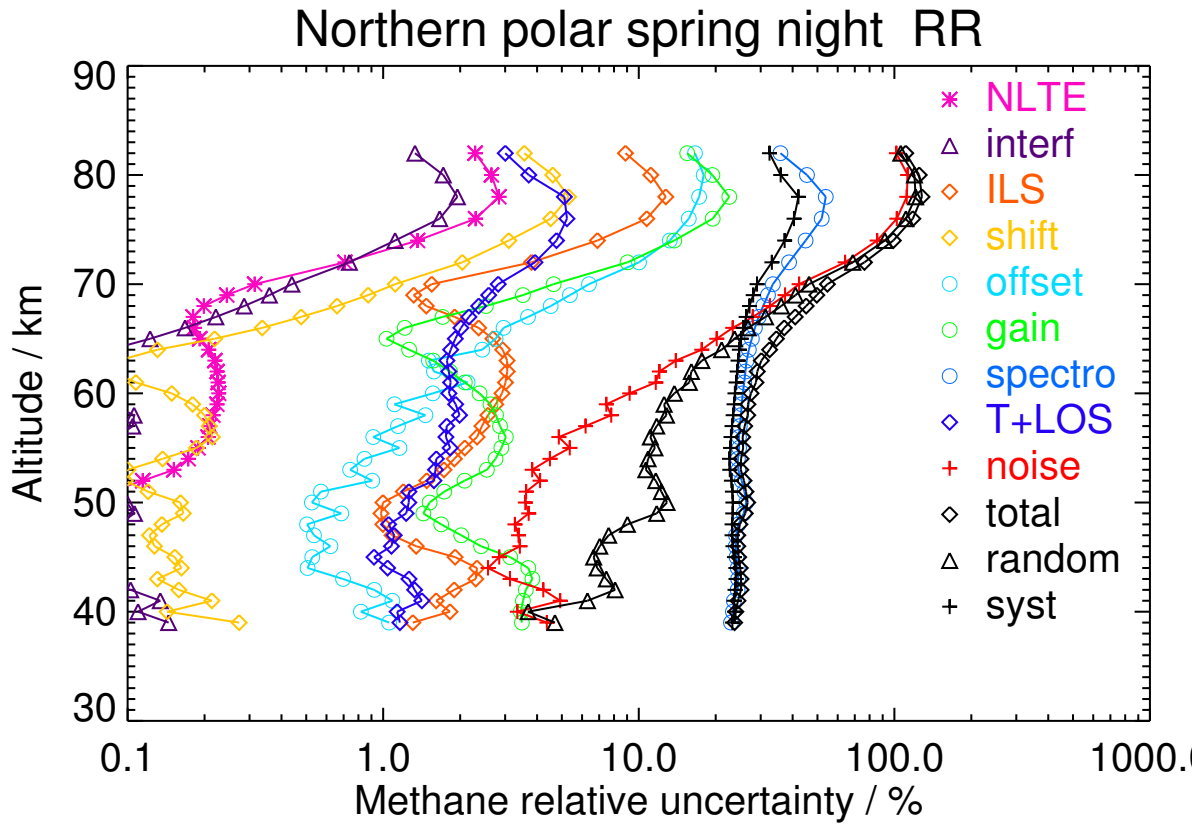

**Figure S106.** V8R\_CH4\_662 Northern polar spring night

**Table S107.** Methane error budget for Northern polar summer day. All uncertainties are  $1\sigma$ .

| altitude (km) | mean target (ppbv) | NLTE (ppbv) | interf (ppbv) | ILS (ppbv) | shift (ppbv) | offset (ppbv) | gain (ppbv) | spectro (ppbv) | T+LOS (ppbv) | noise (ppbv) | random (ppbv) | syst (ppbv) | total (ppbv) |
|---------------|--------------------|-------------|---------------|------------|--------------|---------------|-------------|----------------|--------------|--------------|---------------|-------------|--------------|
| 45            | 131.13             | 0.06        | 0.10          | 2.15       | 0.35         | 0.59          | 3.18        | 30.96          | 0.88         | 3.48         | 4.96          | 31.02       | 31.41        |
| 50            | 75.16              | 0.04        | 0.05          | 0.73       | 0.12         | 0.27          | 0.88        | 18.10          | 0.61         | 2.40         | 4.11          | 17.84       | 18.31        |
| 55            | 57.10              | 0.05        | 0.01          | 0.81       | 0.07         | 0.54          | 0.83        | 13.76          | 0.66         | 2.90         | 4.10          | 13.53       | 14.14        |
| 60            | 64.20              | 0.09        | 0.03          | 1.25       | 0.13         | 1.04          | 1.16        | 15.66          | 0.92         | 4.38         | 6.46          | 15.09       | 16.41        |
| 65            | 81.77              | 0.16        | 0.05          | 3.04       | 0.11         | 1.31          | 1.79        | 21.42          | 1.43         | 8.59         | 12.84         | 19.59       | 23.43        |
| 70            | 78.92              | 0.22        | 0.13          | 1.31       | 0.23         | 2.93          | 1.02        | 21.76          | 1.72         | 21.92        | 24.24         | 19.52       | 31.12        |
| 74            | 62.47              | 0.86        | 0.60          | 3.97       | 1.13         | 2.52          | 4.23        | 21.34          | 0.93         | 32.63        | 34.11         | 20.00       | 39.54        |
| 80            | 70.96              | 2.58        | 0.92          | 5.02       | 2.68         | 7.54          | 6.30        | 24.70          | 0.57         | 54.69        | 56.44         | 23.49       | 61.14        |
| 84            | 69.35              | 4.54        | 1.03          | 4.84       | 3.70         | 8.94          | 7.27        | 26.06          | 0.81         | 63.08        | 66.15         | 21.77       | 69.64        |

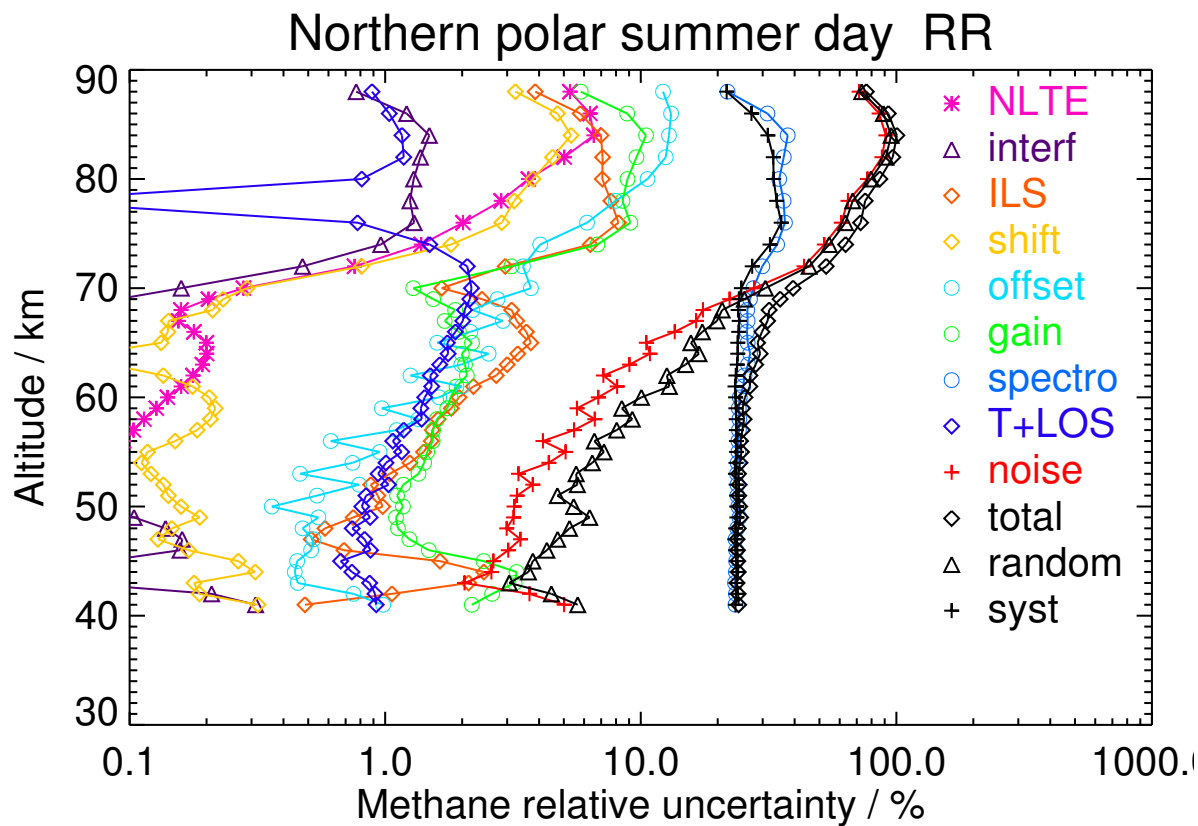

**Figure S107.** V8R\_CH4\_662 Northern polar summer day

**Table S108.** Methane error budget for Northern polar summer night. All uncertainties are  $1\sigma$ .

| altitude (km) | mean target (ppbv) | NLTE (ppbv) | interf (ppbv) | ILS (ppbv) | shift (ppbv) | offset (ppbv) | gain (ppbv) | spectro (ppbv) | T+LOS (ppbv) | noise (ppbv) | random (ppbv) | syst (ppbv) | total (ppbv) |
|---------------|--------------------|-------------|---------------|------------|--------------|---------------|-------------|----------------|--------------|--------------|---------------|-------------|--------------|
| 45            | 113.05             | 0.04        | 0.04          | 2.50       | 0.26         | 0.58          | 3.44        | 26.76          | 0.86         | 3.16         | 6.88          | 26.42       | 27.30        |
| 50            | 65.94              | 0.03        | 0.02          | 0.72       | 0.07         | 0.35          | 0.97        | 15.57          | 0.64         | 2.60         | 4.18          | 15.28       | 15.84        |
| 55            | 109.86             | 0.11        | 0.02          | 1.37       | 0.17         | 1.29          | 2.06        | 28.11          | 1.87         | 5.73         | 15.77         | 24.21       | 28.89        |
| 60            | 149.17             | 0.20        | 0.07          | 3.67       | 0.17         | 2.31          | 3.06        | 35.47          | 3.18         | 8.83         | 17.09         | 32.89       | 37.07        |
| 65            | 153.17             | 0.18        | 0.08          | 5.58       | 0.19         | 2.84          | 2.96        | 36.20          | 4.06         | 16.22        | 19.78         | 35.31       | 40.47        |
| 70            | 127.62             | 0.62        | 0.21          | 1.17       | 0.42         | 4.80          | 1.18        | 35.90          | 4.73         | 36.59        | 39.69         | 33.17       | 51.73        |
| 74            | 87.73              | 1.45        | 0.80          | 4.87       | 1.75         | 5.32          | 6.41        | 35.69          | 3.15         | 51.21        | 53.33         | 34.08       | 63.29        |
| 80            | 66.24              | 3.34        | 0.90          | 5.40       | 2.51         | 8.55          | 7.68        | 32.00          | 0.71         | 64.72        | 67.61         | 28.67       | 73.43        |
| 84            | 93.15              | 9.12        | 1.60          | 10.01      | 4.87         | 12.21         | 13.16       | 56.33          | 0.06         | 85.71        | 98.50         | 36.71       | 105.12       |

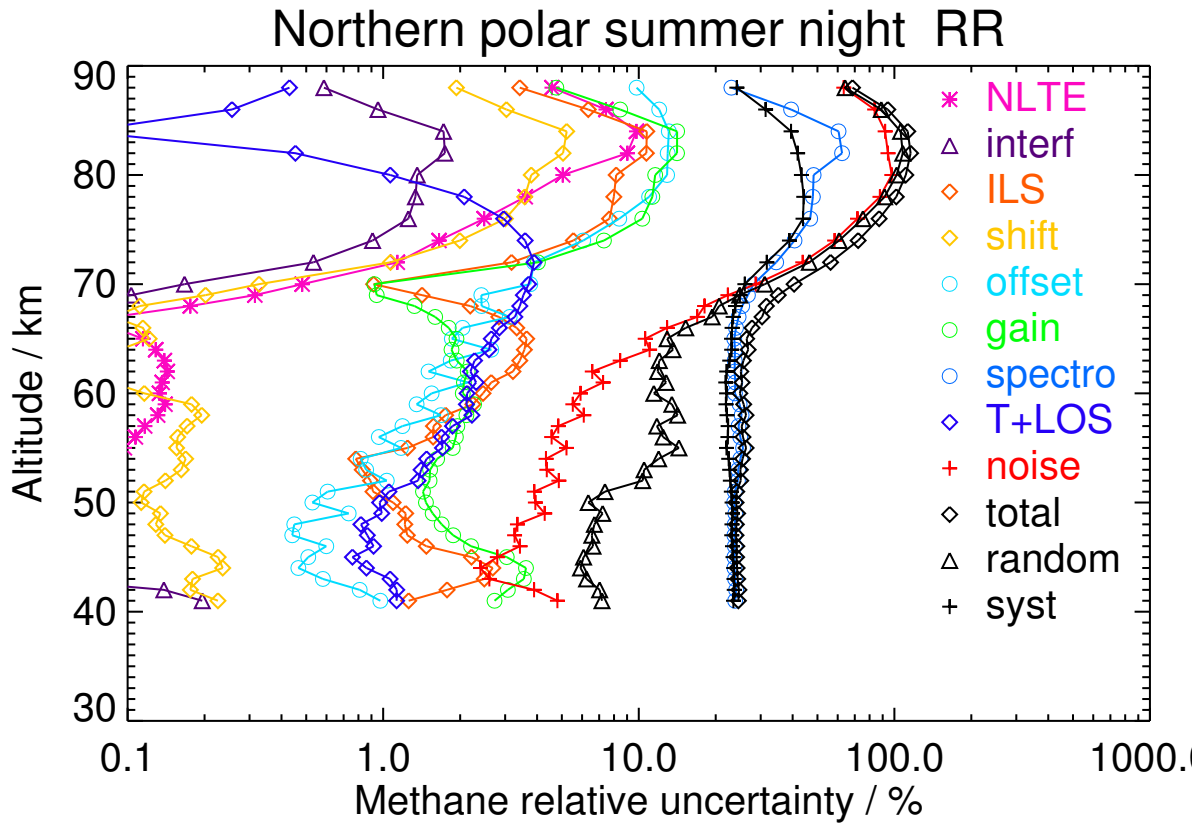

**Figure S108.** V8R\_CH4\_662 Northern polar summer night

**Table S109.** Methane error budget for Northern polar autumn day. All uncertainties are  $1\sigma$ .

| altitude (km) | mean target (ppbv) | NLTE (ppbv) | interf (ppbv) | ILS (ppbv) | shift (ppbv) | offset (ppbv) | gain (ppbv) | spectro (ppbv) | T+LOS (ppbv) | noise (ppbv) | random (ppbv) | syst (ppbv) | total (ppbv) |
|---------------|--------------------|-------------|---------------|------------|--------------|---------------|-------------|----------------|--------------|--------------|---------------|-------------|--------------|
| 45            | 80.15              | 0.07        | 0.03          | 0.66       | 0.12         | 0.64          | 2.25        | 18.97          | 1.18         | 4.00         | 7.14          | 18.23       | 19.58        |
| 50            | 148.58             | 0.23        | 0.03          | 0.92       | 0.15         | 1.45          | 3.24        | 35.09          | 2.42         | 7.94         | 12.39         | 34.07       | 36.25        |
| 55            | 187.87             | 0.49        | 0.03          | 2.08       | 0.15         | 2.26          | 3.93        | 43.92          | 3.94         | 11.32        | 13.77         | 43.68       | 45.80        |
| 60            | 170.48             | 0.64        | 0.03          | 3.69       | 0.10         | 2.58          | 3.33        | 41.62          | 3.57         | 12.47        | 16.39         | 40.78       | 43.95        |
| 65            | 113.37             | 0.51        | 0.04          | 3.15       | 0.07         | 2.17          | 1.81        | 30.32          | 2.85         | 16.26        | 20.20         | 28.32       | 34.79        |
| 70            | 56.72              | 0.20        | 0.09          | 0.86       | 0.24         | 2.96          | 0.47        | 17.92          | 1.82         | 20.76        | 23.05         | 15.30       | 27.66        |
| 74            | 32.99              | 0.27        | 0.15          | 0.56       | 0.42         | 4.38          | 1.57        | 11.19          | 1.32         | 28.70        | 29.61         | 9.80        | 31.19        |
| 80            | 31.07              | 0.25        | 0.15          | 0.71       | 0.48         | 6.53          | 1.93        | 10.78          | 1.02         | 38.34        | 39.50         | 8.61        | 40.43        |

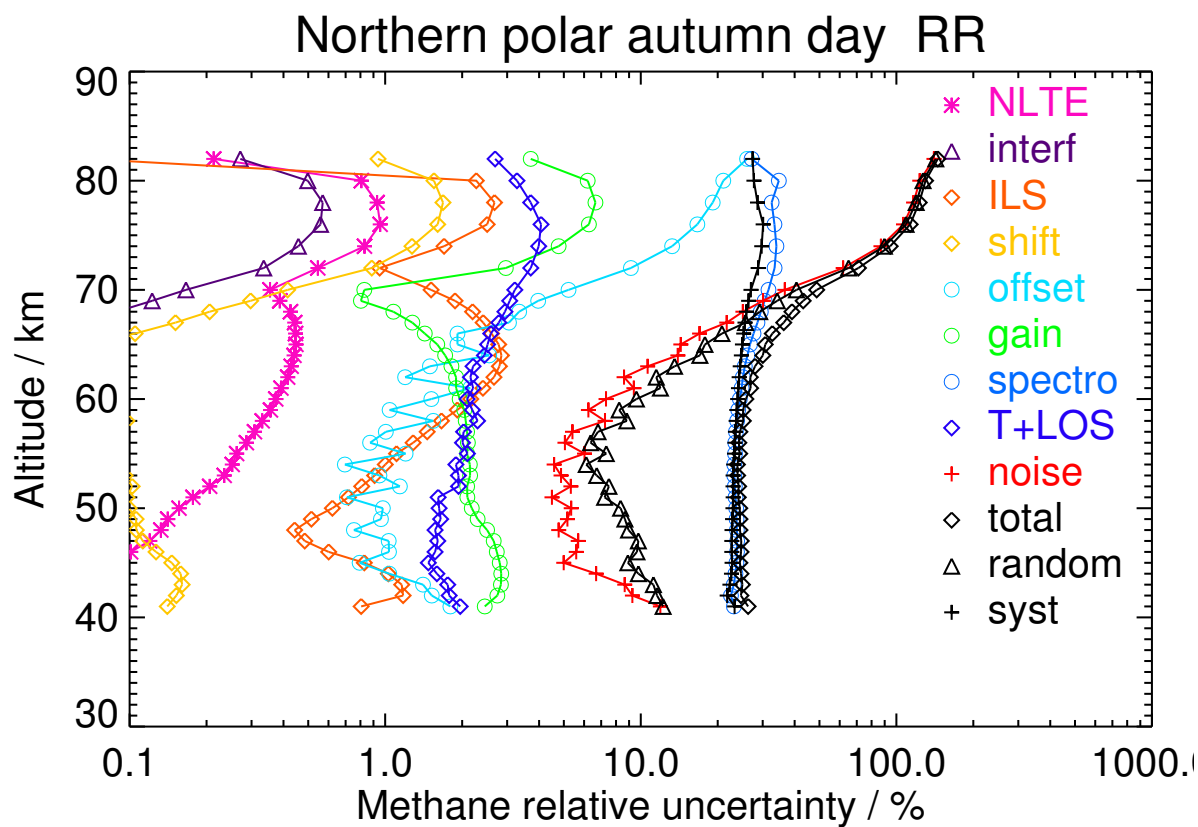

**Figure S109.** V8R\_CH4\_662 Northern polar autumn day



**Table S110.** Methane error budget for Northern polar autumn night. All uncertainties are  $1\sigma$ .

| altitude (km) | mean target (ppbv) | NLTE (ppbv) | interf (ppbv) | ILS (ppbv) | shift (ppbv) | offset (ppbv) | gain (ppbv) | spectro (ppbv) | T+LOS (ppbv) | noise (ppbv) | random (ppbv) | syst (ppbv) | total (ppbv) |
|---------------|--------------------|-------------|---------------|------------|--------------|---------------|-------------|----------------|--------------|--------------|---------------|-------------|--------------|
| 45            | 171.69             | 0.12        | 0.08          | 2.20       | 0.28         | 1.38          | 5.78        | 42.06          | 2.93         | 7.46         | 16.54         | 40.00       | 43.28        |
| 50            | 203.59             | 0.22        | 0.08          | 1.75       | 0.22         | 1.80          | 4.45        | 47.44          | 3.66         | 10.43        | 14.23         | 46.87       | 48.98        |
| 55            | 143.18             | 0.26        | 0.03          | 1.79       | 0.16         | 1.59          | 2.71        | 35.47          | 2.86         | 9.31         | 14.68         | 33.92       | 36.96        |
| 60            | 97.43              | 0.30        | 0.01          | 2.07       | 0.09         | 1.22          | 1.74        | 25.18          | 1.85         | 8.51         | 12.78         | 23.57       | 26.81        |
| 65            | 64.12              | 0.31        | 0.03          | 1.62       | 0.05         | 1.63          | 1.06        | 17.15          | 1.37         | 11.52        | 13.56         | 15.85       | 20.86        |
| 70            | 45.96              | 0.39        | 0.13          | 1.11       | 0.37         | 2.44          | 2.18        | 15.58          | 1.55         | 16.95        | 19.75         | 12.43       | 23.34        |
| 74            | 45.90              | 0.66        | 0.18          | 0.92       | 0.57         | 5.38          | 2.79        | 18.19          | 2.45         | 35.47        | 38.08         | 13.55       | 40.41        |
| 80            | 46.12              | 0.69        | 0.34          | 1.11       | 1.18         | 8.04          | 5.32        | 19.50          | 2.86         | 49.86        | 52.46         | 14.80       | 54.50        |

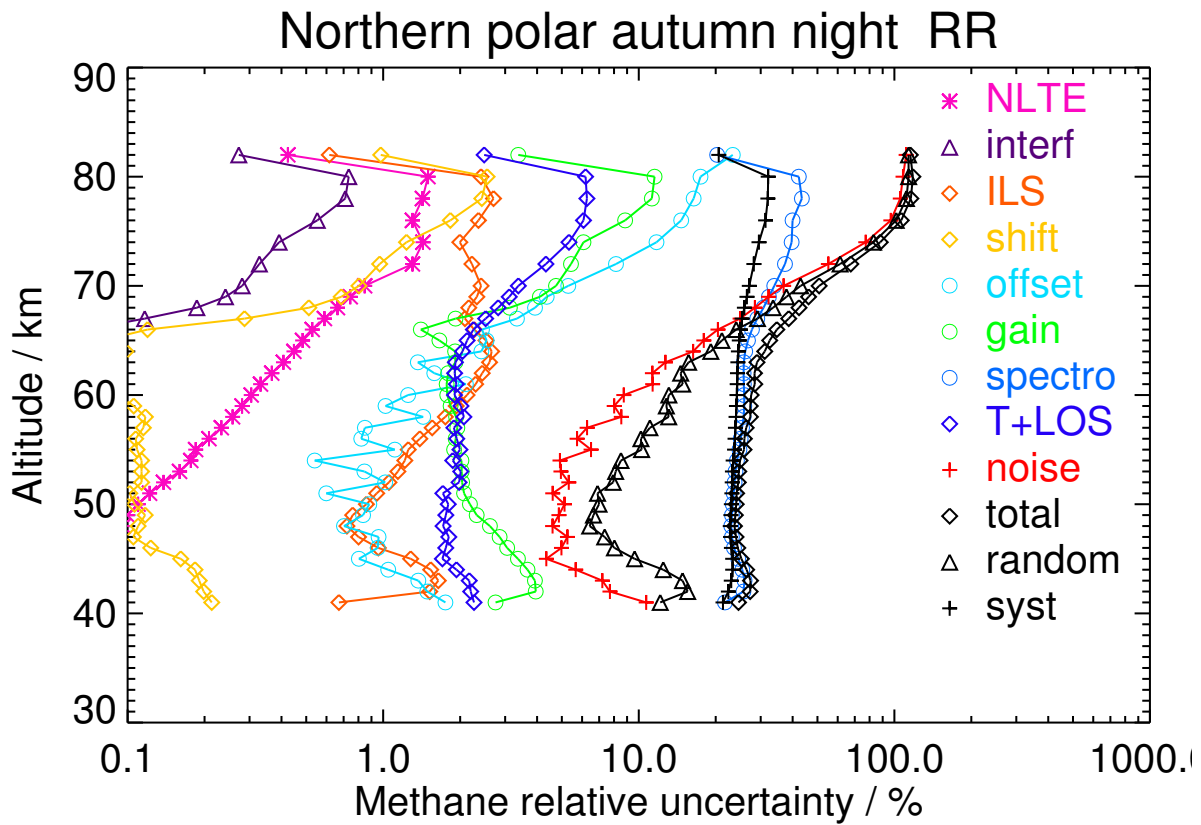

**Figure S110.** V8R\_CH4\_662 Northern polar autumn night

**Table S111.** Methane error budget for Northern midlatitude winter day. All uncertainties are  $1\sigma$ .

| altitude (km) | mean target (ppbv) | NLTE (ppbv) | interf (ppbv) | ILS (ppbv) | shift (ppbv) | offset (ppbv) | gain (ppbv) | spectro (ppbv) | T+LOS (ppbv) | noise (ppbv) | random (ppbv) | syst (ppbv) | total (ppbv) |
|---------------|--------------------|-------------|---------------|------------|--------------|---------------|-------------|----------------|--------------|--------------|---------------|-------------|--------------|
| 40            | 436.99             | 0.33        | 0.98          | 5.39       | 0.58         | 4.64          | 14.78       | 95.19          | 5.61         | 18.52        | 26.96         | 94.75       | 98.51        |
| 45            | 282.60             | 0.28        | 0.36          | 4.15       | 0.35         | 1.63          | 8.75        | 65.64          | 2.94         | 8.80         | 20.19         | 63.91       | 67.02        |
| 50            | 177.47             | 0.29        | 0.10          | 1.91       | 0.18         | 1.33          | 4.07        | 40.71          | 2.67         | 6.89         | 10.98         | 40.16       | 41.64        |
| 55            | 151.36             | 0.42        | 0.10          | 2.44       | 0.20         | 2.05          | 4.31        | 35.12          | 3.11         | 9.16         | 11.61         | 34.95       | 36.82        |
| 60            | 122.21             | 0.39        | 0.07          | 3.05       | 0.15         | 2.05          | 3.21        | 29.89          | 2.66         | 10.09        | 13.48         | 29.06       | 32.03        |
| 65            | 66.34              | 0.15        | 0.05          | 1.87       | 0.13         | 1.82          | 0.77        | 18.97          | 1.68         | 12.15        | 15.48         | 16.67       | 22.75        |
| 70            | 33.88              | 0.22        | 0.09          | 0.62       | 0.22         | 2.16          | 1.01        | 11.00          | 1.11         | 13.84        | 15.46         | 9.01        | 17.89        |
| 74            | 24.29              | 0.46        | 0.15          | 0.88       | 0.37         | 3.57          | 2.30        | 8.19           | 1.11         | 21.42        | 22.34         | 6.85        | 23.37        |
| 80            | 39.85              | 1.93        | 0.36          | 1.78       | 1.01         | 7.41          | 6.63        | 17.65          | 2.36         | 45.95        | 48.34         | 14.09       | 50.36        |
| 84            | 38.87              | 1.20        | 0.16          | 0.31       | 0.55         | 6.71          | 3.03        | 9.27           | 1.19         | 37.48        | 38.10         | 9.81        | 39.35        |

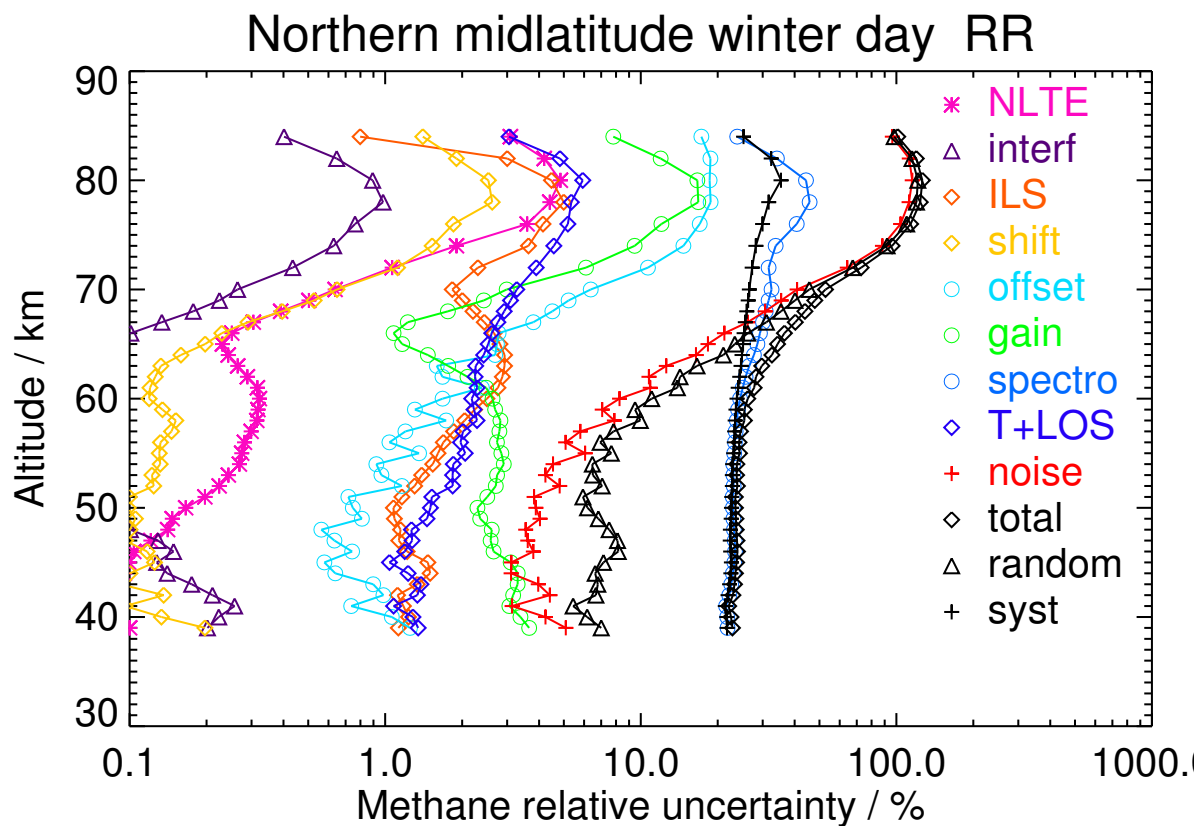

**Figure S111.** V8R\_CH4\_662 Northern midlatitude winter day

**Table S112.** Methane error budget for Northern midlatitude winter night. All uncertainties are  $1\sigma$ .

| altitude<br>(km) | mean target<br>(ppbv) | NLTE<br>(ppbv) | interf<br>(ppbv) | ILS<br>(ppbv) | shift<br>(ppbv) | offset<br>(ppbv) | gain<br>(ppbv) | spectro<br>(ppbv) | T+LOS<br>(ppbv) | noise<br>(ppbv) | random<br>(ppbv) | syst<br>(ppbv) | total<br>(ppbv) |
|------------------|-----------------------|----------------|------------------|---------------|-----------------|------------------|----------------|-------------------|-----------------|-----------------|------------------|----------------|-----------------|
| 40               | 373.77                | 0.25           | 0.70             | 6.94          | 0.53            | 5.57             | 19.56          | 94.52             | 6.77            | 21.65           | 28.26            | 95.46          | 99.56           |
| 45               | 276.97                | 0.17           | 0.19             | 4.73          | 0.27            | 2.39             | 12.73          | 71.39             | 4.05            | 10.90           | 27.73            | 68.21          | 73.63           |
| 50               | 181.75                | 0.18           | 0.09             | 2.47          | 0.19            | 1.75             | 5.92           | 44.07             | 3.24            | 8.83            | 16.29            | 42.54          | 45.55           |
| 55               | 164.64                | 0.28           | 0.09             | 2.33          | 0.16            | 2.23             | 4.79           | 37.94             | 3.92            | 11.38           | 13.56            | 37.87          | 40.22           |
| 60               | 134.84                | 0.27           | 0.05             | 2.68          | 0.13            | 2.13             | 2.69           | 32.62             | 3.35            | 12.81           | 14.66            | 32.30          | 35.47           |
| 65               | 86.73                 | 0.27           | 0.05             | 2.24          | 0.11            | 2.14             | 1.21           | 22.60             | 2.41            | 15.96           | 17.64            | 21.71          | 27.97           |
| 70               | 47.21                 | 0.25           | 0.08             | 0.91          | 0.17            | 2.96             | 0.94           | 13.35             | 1.61            | 18.94           | 20.01            | 12.23          | 23.45           |
| 74               | 33.42                 | 0.29           | 0.12             | 0.51          | 0.33            | 4.70             | 1.70           | 11.48             | 1.53            | 28.22           | 29.57            | 9.03           | 30.92           |
| 80               | 28.80                 | 0.70           | 0.04             | 0.71          | 0.16            | 6.20             | 0.87           | 7.81              | 0.77            | 33.81           | 34.71            | 6.30           | 35.28           |

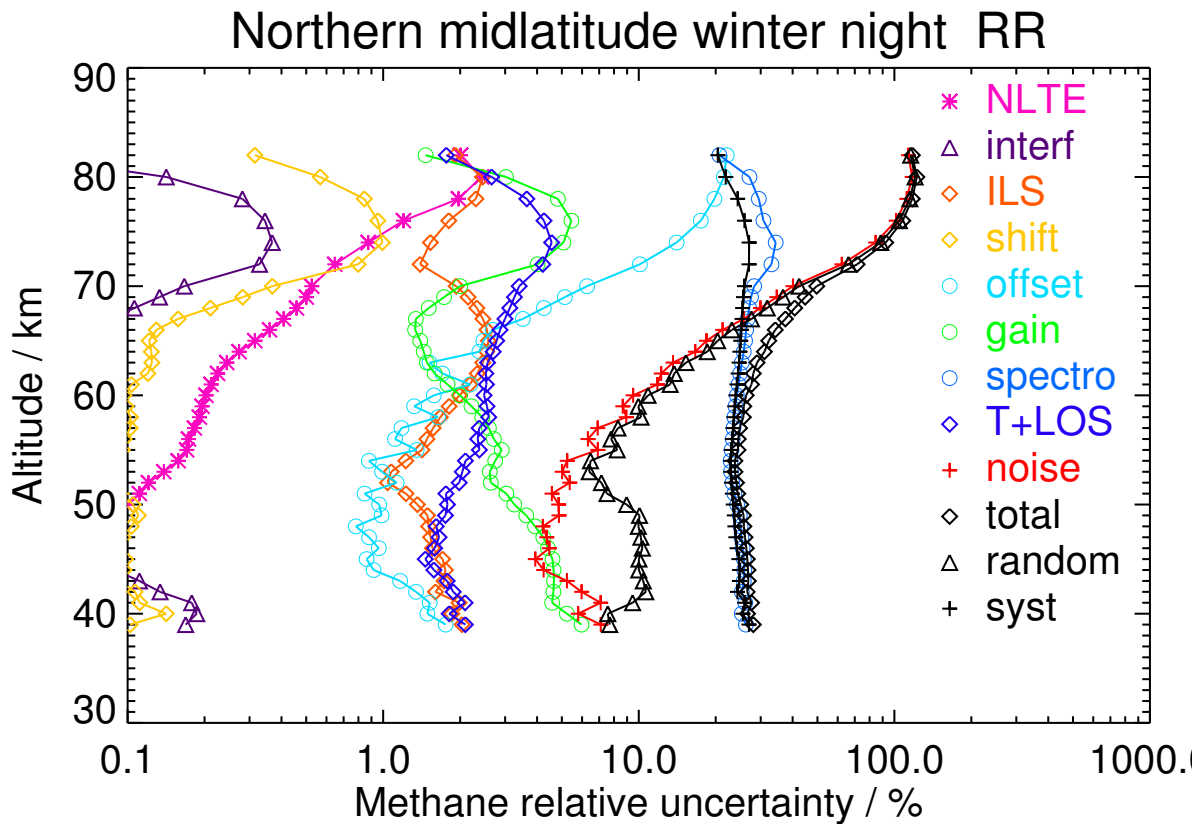**Figure S112.** V8R\_CH4\_662 Northern midlatitude winter night

**Table S113.** Methane error budget for Northern midlatitude spring day. All uncertainties are  $1\sigma$ .

| altitude (km) | mean target (ppbv) | NLTE (ppbv) | interf (ppbv) | ILS (ppbv) | shift (ppbv) | offset (ppbv) | gain (ppbv) | spectro (ppbv) | T+LOS (ppbv) | noise (ppbv) | random (ppbv) | syst (ppbv) | total (ppbv) |
|---------------|--------------------|-------------|---------------|------------|--------------|---------------|-------------|----------------|--------------|--------------|---------------|-------------|--------------|
| 45            | 245.88             | 0.30        | 0.22          | 4.74       | 0.31         | 1.61          | 10.01       | 63.55          | 2.52         | 6.64         | 28.85         | 58.16       | 64.92        |
| 50            | 200.48             | 0.38        | 0.15          | 3.11       | 0.29         | 1.66          | 6.53        | 49.58          | 3.12         | 6.89         | 21.43         | 45.95       | 50.70        |
| 55            | 164.03             | 0.45        | 0.13          | 3.52       | 0.28         | 2.11          | 5.44        | 38.60          | 3.46         | 8.07         | 14.95         | 37.29       | 40.18        |
| 60            | 113.86             | 0.35        | 0.07          | 3.29       | 0.17         | 2.09          | 3.25        | 27.80          | 2.37         | 9.01         | 12.67         | 26.93       | 29.76        |
| 65            | 66.83              | 0.15        | 0.03          | 2.04       | 0.07         | 1.24          | 1.08        | 17.46          | 1.39         | 10.45        | 12.12         | 16.61       | 20.56        |
| 70            | 39.47              | 0.24        | 0.11          | 0.56       | 0.27         | 1.83          | 1.50        | 11.84          | 1.11         | 14.62        | 15.65         | 10.78       | 19.00        |
| 74            | 40.84              | 1.15        | 0.34          | 2.56       | 0.93         | 3.99          | 5.90        | 17.44          | 2.19         | 28.74        | 31.49         | 14.25       | 34.57        |
| 80            | 61.91              | 4.21        | 1.26          | 9.29       | 3.99         | 9.86          | 20.22       | 37.94          | 3.85         | 63.28        | 72.17         | 29.63       | 78.02        |

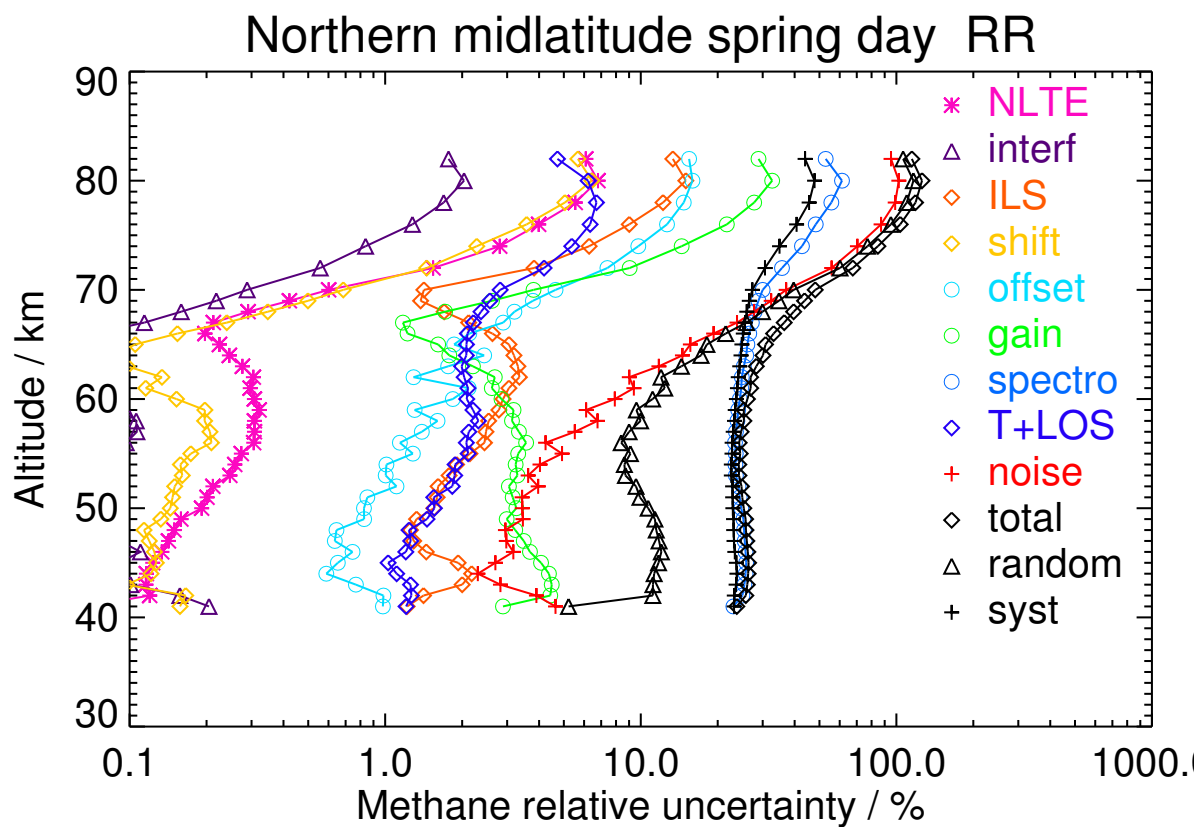

**Figure S113.** V8R\_CH4\_662 Northern midlatitude spring day

**Table S114.** Methane error budget for Northern midlatitude spring night. All uncertainties are  $1\sigma$ .

| altitude (km) | mean target (ppbv) | NLTE (ppbv) | interf (ppbv) | ILS (ppbv) | shift (ppbv) | offset (ppbv) | gain (ppbv) | spectro (ppbv) | T+LOS (ppbv) | noise (ppbv) | random (ppbv) | syst (ppbv) | total (ppbv) |
|---------------|--------------------|-------------|---------------|------------|--------------|---------------|-------------|----------------|--------------|--------------|---------------|-------------|--------------|
| 40            | 540.88             | 0.06        | 1.39          | 4.28       | 1.12         | 4.34          | 15.84       | 126.12         | 5.88         | 19.20        | 20.84         | 127.15      | 128.85       |
| 45            | 278.09             | 0.11        | 0.34          | 4.08       | 0.32         | 1.47          | 8.73        | 66.40          | 2.52         | 7.16         | 24.86         | 62.80       | 67.54        |
| 50            | 240.96             | 0.18        | 0.17          | 2.58       | 0.20         | 1.60          | 5.89        | 55.78          | 3.57         | 7.33         | 19.38         | 53.35       | 56.76        |
| 55            | 200.47             | 0.33        | 0.20          | 4.73       | 0.45         | 2.79          | 8.02        | 44.60          | 4.92         | 9.60         | 16.59         | 43.87       | 46.91        |
| 60            | 142.31             | 0.23        | 0.10          | 4.02       | 0.24         | 2.42          | 4.22        | 32.81          | 3.31         | 9.95         | 13.36         | 32.37       | 35.02        |
| 65            | 86.72              | 0.09        | 0.07          | 2.35       | 0.17         | 1.82          | 0.99        | 22.57          | 2.22         | 13.22        | 15.03         | 21.76       | 26.44        |
| 70            | 39.81              | 0.30        | 0.19          | 0.75       | 0.54         | 2.25          | 2.79        | 13.68          | 1.83         | 16.35        | 17.33         | 13.08       | 21.71        |
| 74            | 22.62              | 0.41        | 0.26          | 1.76       | 0.77         | 3.03          | 4.22        | 10.50          | 1.78         | 20.14        | 21.13         | 10.16       | 23.45        |
| 80            | 22.84              | 0.49        | 0.28          | 2.03       | 0.85         | 4.23          | 4.79        | 9.35           | 1.47         | 25.79        | 26.43         | 10.10       | 28.29        |

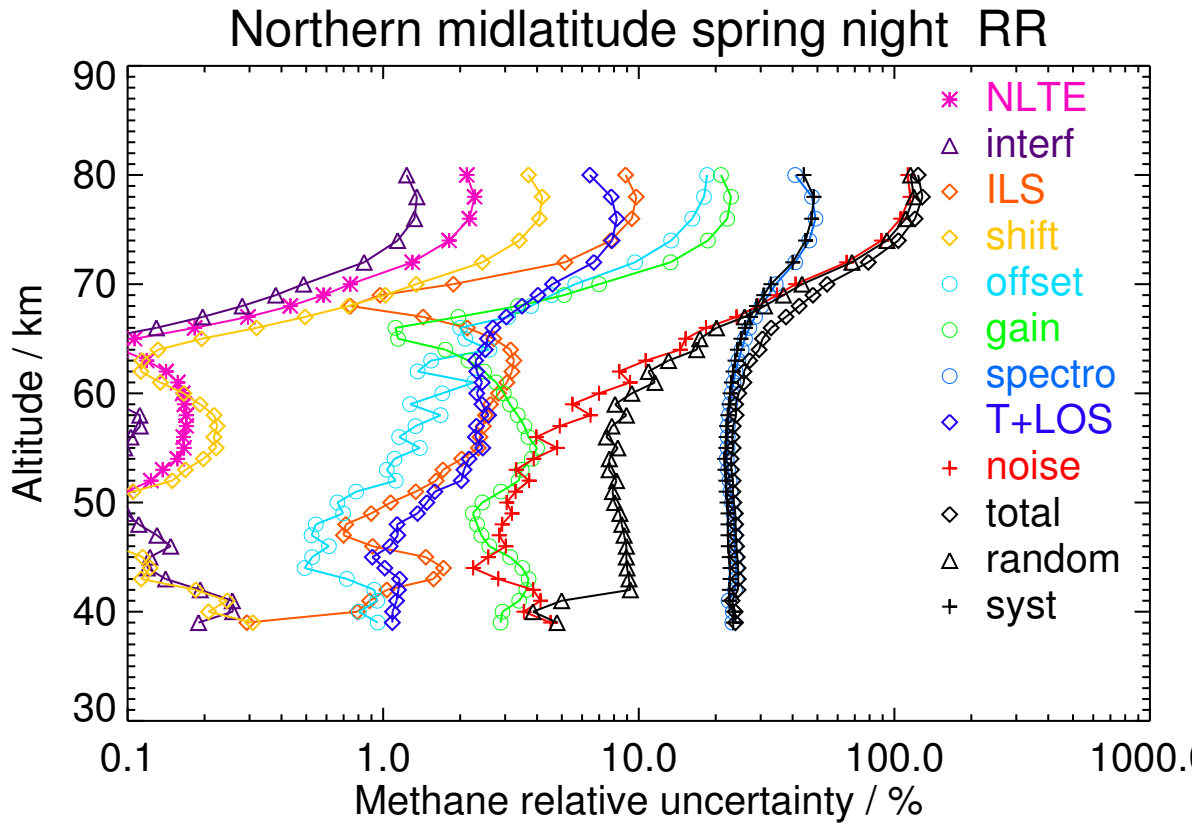

**Figure S114.** V8R\_CH4\_662 Northern midlatitude spring night

**Table S115.** Methane error budget for Northern midlatitude summer day. All uncertainties are  $1\sigma$ .

| altitude (km) | mean target (ppbv) | NLTE (ppbv) | interf (ppbv) | ILS (ppbv) | shift (ppbv) | offset (ppbv) | gain (ppbv) | spectro (ppbv) | T+LOS (ppbv) | noise (ppbv) | random (ppbv) | syst (ppbv) | total (ppbv) |
|---------------|--------------------|-------------|---------------|------------|--------------|---------------|-------------|----------------|--------------|--------------|---------------|-------------|--------------|
| 45            | 224.35             | 0.19        | 0.20          | 3.75       | 0.37         | 1.23          | 7.80        | 56.36          | 1.96         | 5.81         | 19.84         | 53.82       | 57.36        |
| 50            | 147.79             | 0.17        | 0.13          | 1.48       | 0.22         | 0.84          | 3.00        | 37.71          | 1.80         | 5.13         | 16.75         | 34.39       | 38.26        |
| 55            | 203.55             | 0.42        | 0.07          | 3.38       | 0.46         | 2.70          | 6.00        | 52.72          | 4.45         | 9.44         | 29.02         | 45.85       | 54.26        |
| 60            | 169.02             | 0.50        | 0.10          | 4.59       | 0.24         | 3.43          | 4.87        | 41.52          | 4.14         | 11.31        | 19.32         | 39.41       | 43.89        |
| 65            | 183.87             | 0.50        | 0.08          | 5.33       | 0.21         | 4.02          | 4.07        | 44.90          | 5.30         | 19.84        | 25.21         | 43.17       | 49.99        |
| 70            | 125.35             | 0.71        | 0.18          | 1.44       | 0.55         | 4.55          | 1.95        | 33.51          | 3.96         | 35.63        | 37.97         | 31.53       | 49.35        |
| 74            | 89.87              | 1.86        | 0.37          | 2.20       | 1.09         | 5.49          | 4.73        | 27.52          | 2.40         | 51.94        | 53.36         | 26.01       | 59.36        |
| 80            | 82.64              | 8.54        | 1.05          | 6.45       | 3.86         | 9.96          | 13.53       | 41.57          | 0.52         | 72.47        | 80.39         | 30.52       | 85.99        |
| 84            | 247.72             | 50.55       | 1.61          | 7.59       | 7.39         | 29.59         | 20.23       | 120.87         | 1.09         | 190.84       | 221.46        | 77.09       | 234.49       |

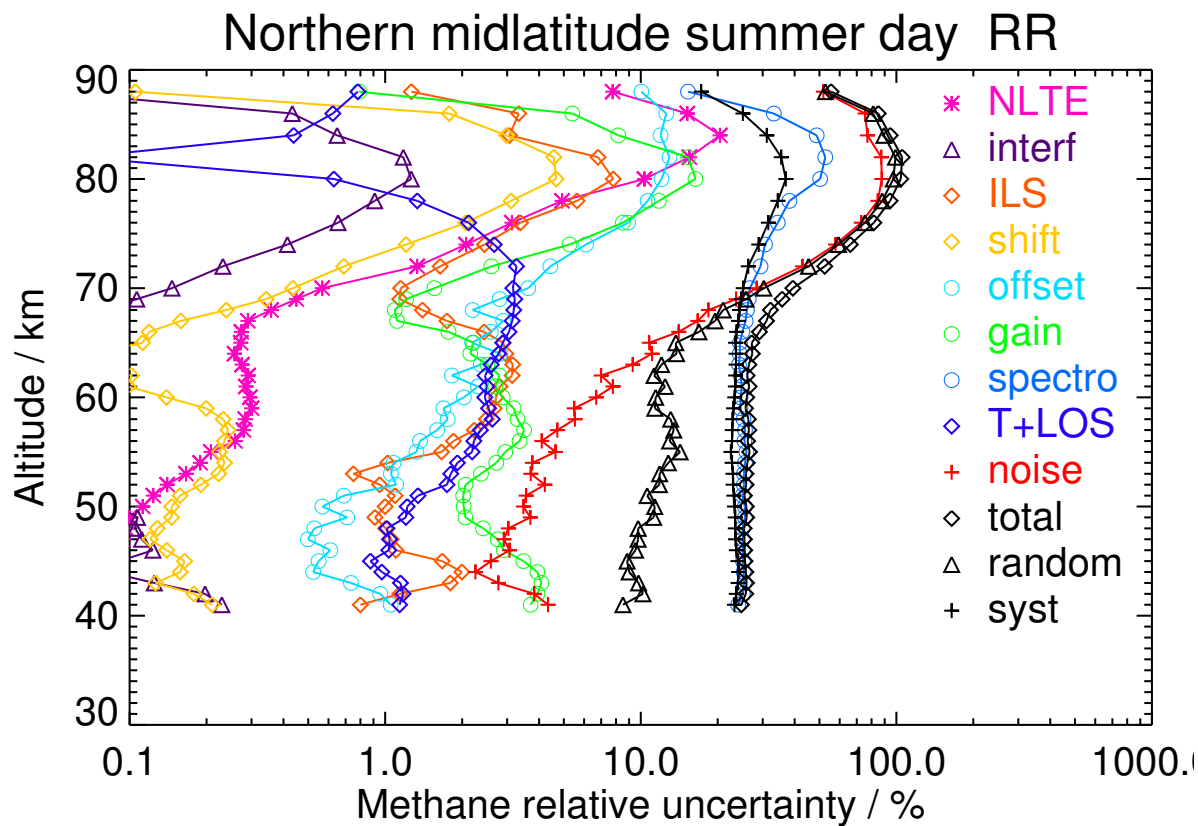

**Figure S115.** V8R\_CH4\_662 Northern midlatitude summer day

**Table S116.** Methane error budget for Northern midlatitude summer night. All uncertainties are  $1\sigma$ .

| altitude (km) | mean target (ppbv) | NLTE (ppbv) | interf (ppbv) | ILS (ppbv) | shift (ppbv) | offset (ppbv) | gain (ppbv) | spectro (ppbv) | T+LOS (ppbv) | noise (ppbv) | random (ppbv) | syst (ppbv) | total (ppbv) |
|---------------|--------------------|-------------|---------------|------------|--------------|---------------|-------------|----------------|--------------|--------------|---------------|-------------|--------------|
| 45            | 210.43             | 0.08        | 0.23          | 2.86       | 0.24         | 1.20          | 6.50        | 50.81          | 1.84         | 5.45         | 20.28         | 47.49       | 51.64        |
| 50            | 187.37             | 0.13        | 0.15          | 1.88       | 0.25         | 1.23          | 4.74        | 48.56          | 2.56         | 6.36         | 26.23         | 41.76       | 49.32        |
| 55            | 229.78             | 0.22        | 0.14          | 4.27       | 0.52         | 3.15          | 7.72        | 56.86          | 5.39         | 10.89        | 32.76         | 48.95       | 58.90        |
| 60            | 267.65             | 0.22        | 0.15          | 7.58       | 0.33         | 5.26          | 7.85        | 59.97          | 7.69         | 16.66        | 27.58         | 57.61       | 63.87        |
| 65            | 177.66             | 0.34        | 0.07          | 5.78       | 0.19         | 3.70          | 3.80        | 43.37          | 6.04         | 20.95        | 26.86         | 41.19       | 49.18        |
| 70            | 166.03             | 1.39        | 0.36          | 2.42       | 1.00         | 5.56          | 4.35        | 48.12          | 7.48         | 47.20        | 50.73         | 45.65       | 68.25        |
| 74            | 101.77             | 2.32        | 0.61          | 4.15       | 1.91         | 6.56          | 7.33        | 38.45          | 4.43         | 61.30        | 63.71         | 36.33       | 73.34        |
| 80            | 69.70              | 2.61        | 0.42          | 2.43       | 1.83         | 10.91         | 5.29        | 25.74          | 0.70         | 76.75        | 78.61         | 23.18       | 81.95        |
| 84            | 52.67              | 1.74        | 0.33          | 2.20       | 1.53         | 8.48          | 4.01        | 17.92          | 0.02         | 51.89        | 53.85         | 14.57       | 55.79        |

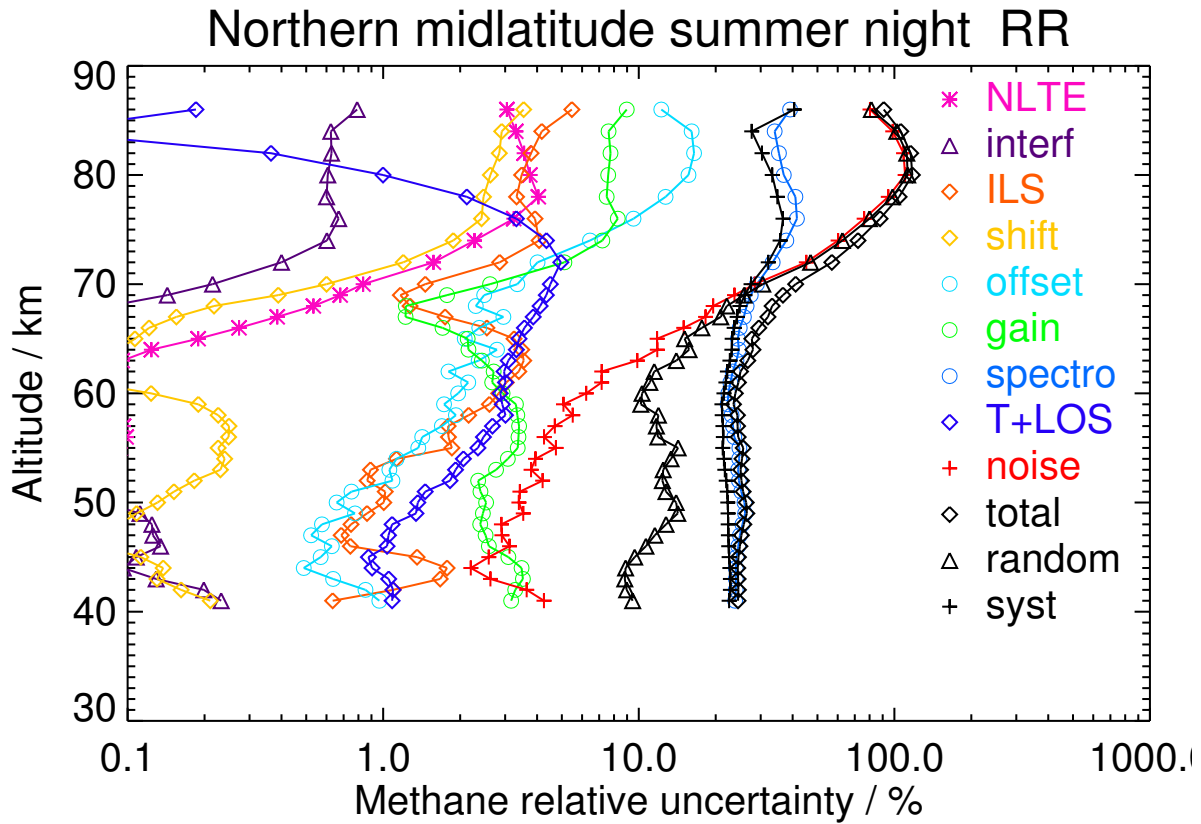

**Figure S116.** V8R\_CH4\_662 Northern midlatitude summer night

**Table S117.** Methane error budget for Northern midlatitude autumn day. All uncertainties are  $1\sigma$ .

| altitude (km) | mean target (ppbv) | NLTE (ppbv) | interf (ppbv) | ILS (ppbv) | shift (ppbv) | offset (ppbv) | gain (ppbv) | spectro (ppbv) | T+LOS (ppbv) | noise (ppbv) | random (ppbv) | syst (ppbv) | total (ppbv) |
|---------------|--------------------|-------------|---------------|------------|--------------|---------------|-------------|----------------|--------------|--------------|---------------|-------------|--------------|
| 45            | 344.37             | 0.33        | 0.42          | 4.08       | 0.25         | 2.20          | 11.80       | 83.57          | 3.82         | 10.27        | 34.70         | 77.85       | 85.23        |
| 50            | 311.22             | 0.44        | 0.28          | 2.01       | 0.32         | 2.13          | 6.34        | 71.54          | 5.03         | 12.44        | 23.32         | 69.31       | 73.13        |
| 55            | 282.33             | 0.85        | 0.13          | 4.07       | 0.35         | 3.90          | 8.55        | 62.62          | 7.44         | 15.01        | 19.76         | 62.59       | 65.63        |
| 60            | 225.87             | 0.81        | 0.10          | 6.10       | 0.21         | 4.57          | 6.56        | 51.85          | 6.26         | 16.23        | 19.91         | 51.92       | 55.61        |
| 65            | 178.00             | 0.47        | 0.04          | 4.89       | 0.12         | 3.28          | 3.31        | 44.91          | 5.87         | 21.81        | 27.02         | 42.93       | 50.72        |
| 70            | 97.10              | 0.60        | 0.16          | 1.22       | 0.45         | 3.96          | 2.62        | 28.24          | 4.42         | 30.72        | 33.33         | 25.97       | 42.25        |
| 74            | 67.72              | 1.82        | 0.40          | 3.09       | 1.21         | 6.06          | 7.87        | 28.24          | 4.99         | 47.13        | 51.54         | 22.37       | 56.19        |
| 80            | 43.71              | 1.77        | 0.37          | 3.03       | 1.19         | 7.37          | 7.82        | 17.47          | 3.24         | 47.85        | 49.80         | 15.98       | 52.30        |

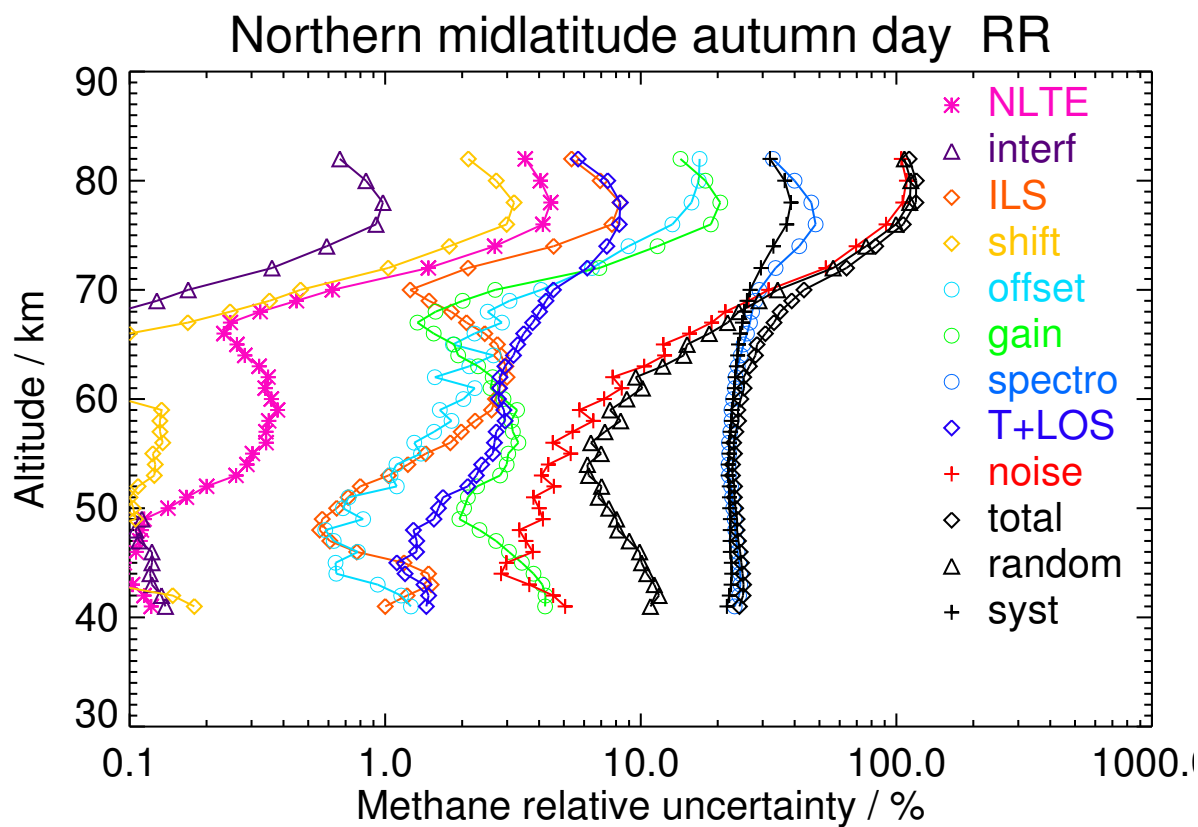

**Figure S117.** V8R\_CH4\_662 Northern midlatitude autumn day



**Table S118.** Methane error budget for Northern midlatitude autumn night. All uncertainties are  $1\sigma$ .

| altitude (km) | mean target (ppbv) | NLTE (ppbv) | interf (ppbv) | ILS (ppbv) | shift (ppbv) | offset (ppbv) | gain (ppbv) | spectro (ppbv) | T+LOS (ppbv) | noise (ppbv) | random (ppbv) | syst (ppbv) | total (ppbv) |
|---------------|--------------------|-------------|---------------|------------|--------------|---------------|-------------|----------------|--------------|--------------|---------------|-------------|--------------|
| 45            | 295.22             | 0.15        | 0.36          | 4.60       | 0.29         | 1.96          | 11.87       | 80.18          | 3.45         | 9.20         | 41.96         | 70.22       | 81.80        |
| 50            | 240.12             | 0.22        | 0.16          | 2.49       | 0.21         | 2.04          | 6.63        | 57.79          | 4.20         | 10.23        | 23.01         | 54.65       | 59.29        |
| 55            | 250.30             | 0.40        | 0.09          | 3.86       | 0.28         | 3.39          | 7.63        | 56.65          | 6.50         | 14.08        | 21.77         | 55.33       | 59.46        |
| 60            | 224.77             | 0.46        | 0.10          | 5.87       | 0.19         | 4.11          | 6.29        | 51.77          | 6.62         | 16.25        | 22.75         | 50.61       | 55.49        |
| 65            | 166.66             | 0.28        | 0.06          | 5.15       | 0.20         | 3.51          | 3.26        | 42.45          | 5.63         | 21.90        | 27.66         | 39.97       | 48.61        |
| 70            | 86.12              | 0.59        | 0.21          | 1.61       | 0.56         | 3.53          | 3.35        | 26.92          | 4.04         | 28.97        | 32.11         | 24.01       | 40.10        |
| 74            | 55.14              | 1.30        | 0.39          | 2.80       | 1.22         | 5.87          | 7.49        | 26.28          | 4.21         | 42.47        | 47.34         | 19.31       | 51.13        |
| 80            | 47.98              | 1.12        | 0.26          | 1.46       | 0.82         | 8.39          | 4.93        | 17.15          | 2.83         | 54.55        | 56.09         | 15.18       | 58.11        |

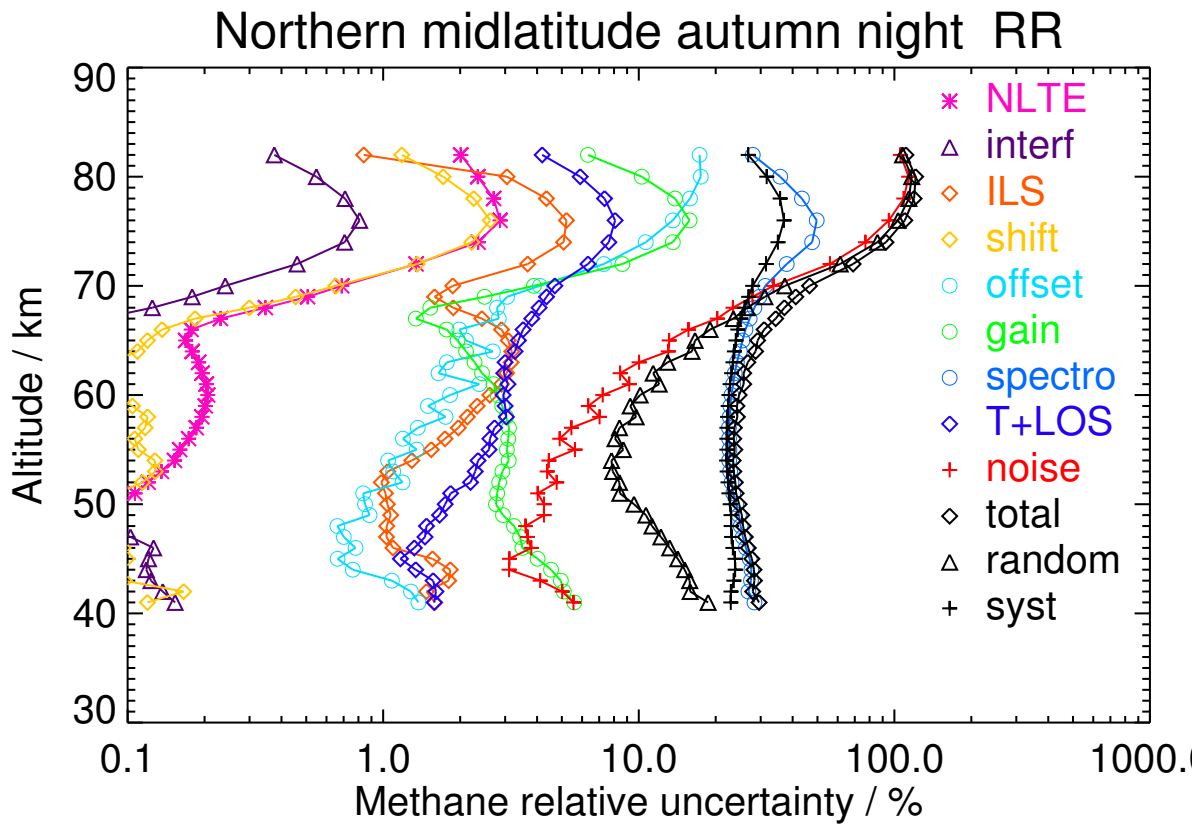

**Figure S118.** V8R\_CH4\_662 Northern midlatitude autumn night

**Table S119.** Methane error budget for Tropics day. All uncertainties are  $1\sigma$ .

| altitude (km) | mean target (ppbv) | NLTE (ppbv) | interf (ppbv) | ILS (ppbv) | shift (ppbv) | offset (ppbv) | gain (ppbv) | spectro (ppbv) | T+LOS (ppbv) | noise (ppbv) | random (ppbv) | syst (ppbv) | total (ppbv) |
|---------------|--------------------|-------------|---------------|------------|--------------|---------------|-------------|----------------|--------------|--------------|---------------|-------------|--------------|
| 40            | 627.43             | 0.59        | 0.81          | 3.34       | 2.05         | 6.44          | 24.02       | 144.60         | 6.44         | 31.18        | 42.56         | 144.04      | 150.19       |
| 45            | 436.54             | 0.30        | 0.70          | 6.01       | 0.65         | 2.33          | 12.80       | 101.75         | 3.98         | 12.63        | 23.45         | 100.92      | 103.60       |
| 50            | 291.63             | 0.47        | 0.24          | 3.87       | 0.35         | 2.17          | 8.32        | 66.49          | 4.60         | 9.24         | 17.05         | 65.78       | 67.95        |
| 55            | 205.94             | 0.56        | 0.17          | 4.66       | 0.46         | 2.84          | 7.70        | 46.09          | 4.84         | 9.36         | 13.90         | 46.17       | 48.21        |
| 60            | 167.68             | 0.49        | 0.13          | 4.82       | 0.30         | 3.26          | 5.32        | 38.23          | 4.15         | 11.29        | 13.48         | 38.56       | 40.85        |
| 65            | 138.44             | 0.30        | 0.05          | 4.23       | 0.15         | 2.86          | 2.86        | 33.10          | 3.71         | 17.20        | 18.44         | 33.16       | 37.94        |
| 70            | 97.84              | 0.67        | 0.17          | 0.91       | 0.46         | 3.54          | 2.10        | 26.49          | 4.07         | 28.27        | 29.79         | 25.47       | 39.19        |
| 74            | 71.28              | 2.01        | 0.46          | 3.15       | 1.42         | 5.93          | 7.88        | 27.26          | 5.30         | 47.66        | 50.65         | 24.31       | 56.18        |
| 80            | 32.59              | 1.11        | 0.28          | 1.83       | 0.90         | 4.57          | 5.13        | 11.35          | 1.82         | 31.07        | 32.08         | 11.01       | 33.91        |

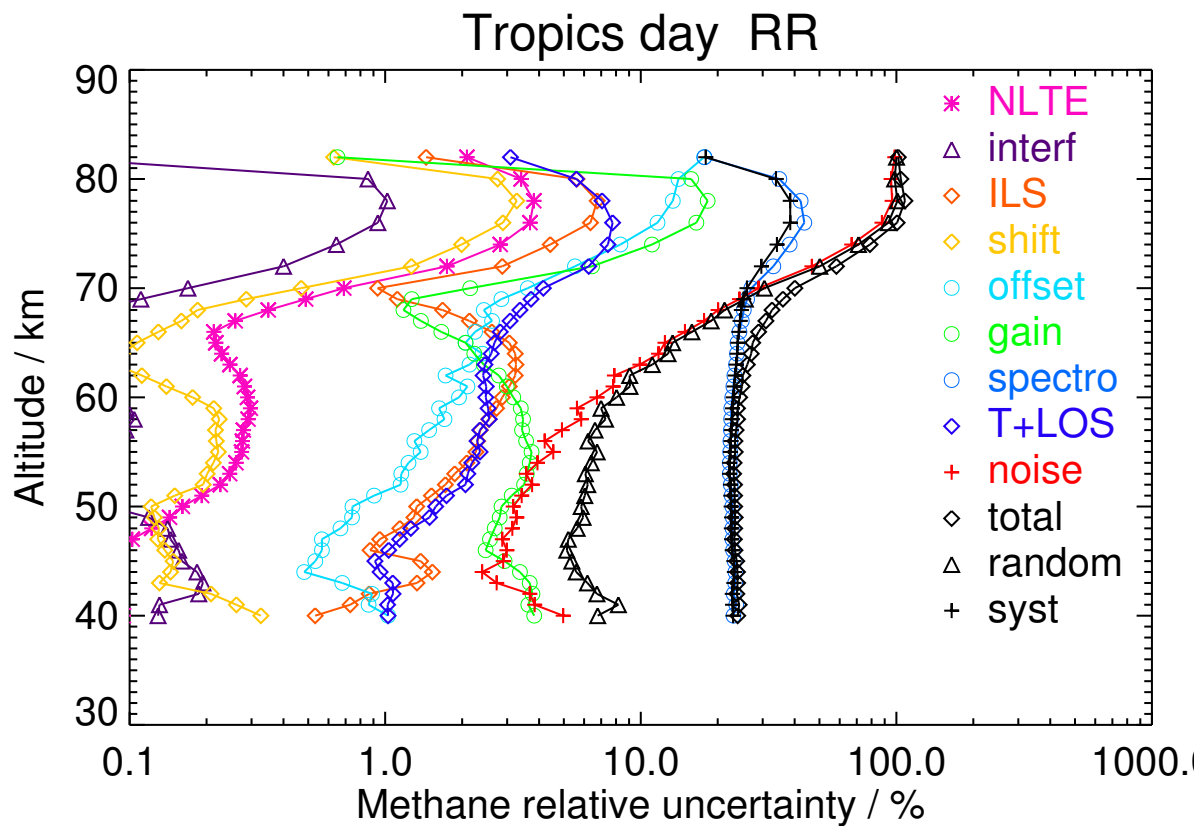

**Figure S119.** V8R\_CH4\_662 Tropics day

**Table S120.** Methane error budget for Tropics night. All uncertainties are  $1\sigma$ .

| altitude (km) | mean target (ppbv) | NLTE (ppbv) | interf (ppbv) | ILS (ppbv) | shift (ppbv) | offset (ppbv) | gain (ppbv) | spectro (ppbv) | T+LOS (ppbv) | noise (ppbv) | random (ppbv) | syst (ppbv) | total (ppbv) |
|---------------|--------------------|-------------|---------------|------------|--------------|---------------|-------------|----------------|--------------|--------------|---------------|-------------|--------------|
| 45            | 448.33             | 0.17        | 0.47          | 7.17       | 0.61         | 2.32          | 14.81       | 104.89         | 4.33         | 12.27        | 21.08         | 104.90      | 107.00       |
| 50            | 299.42             | 0.21        | 0.20          | 4.32       | 0.33         | 2.31          | 8.54        | 68.63          | 4.96         | 9.32         | 16.98         | 68.05       | 70.14        |
| 55            | 218.45             | 0.23        | 0.15          | 5.19       | 0.41         | 2.95          | 7.81        | 49.26          | 5.22         | 10.21        | 14.41         | 49.47       | 51.53        |
| 60            | 172.76             | 0.15        | 0.10          | 5.28       | 0.24         | 2.86          | 5.01        | 39.55          | 4.22         | 10.64        | 12.97         | 39.85       | 41.91        |
| 65            | 143.20             | 0.24        | 0.04          | 4.65       | 0.16         | 3.39          | 2.76        | 34.49          | 4.35         | 18.68        | 20.80         | 34.14       | 39.98        |
| 70            | 99.86              | 1.17        | 0.45          | 2.93       | 1.25         | 3.60          | 7.38        | 30.89          | 5.26         | 31.38        | 33.59         | 30.29       | 45.23        |
| 74            | 64.66              | 2.16        | 0.79          | 5.75       | 2.73         | 6.02          | 13.44       | 31.28          | 6.68         | 46.59        | 50.98         | 29.28       | 58.79        |
| 80            | 73.01              | 3.79        | 0.40          | 1.32       | 1.80         | 10.54         | 6.70        | 26.08          | 7.08         | 71.80        | 73.87         | 24.60       | 77.85        |

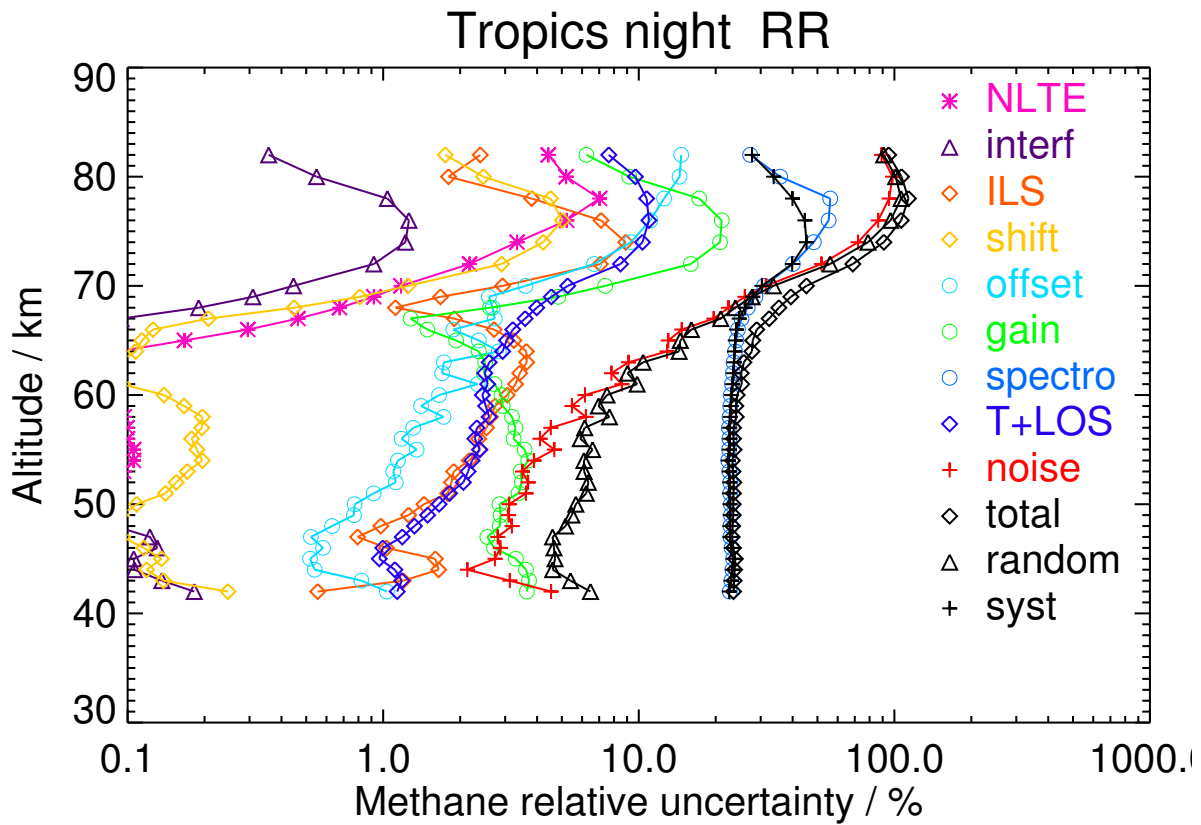

**Figure S120.** V8R\_CH4\_662 Tropics night

**Table S121.** Methane error budget for Southern midlatitude winter day. All uncertainties are  $1\sigma$ .

| altitude (km) | mean target (ppbv) | NLTE (ppbv) | interf (ppbv) | ILS (ppbv) | shift (ppbv) | offset (ppbv) | gain (ppbv) | spectro (ppbv) | T+LOS (ppbv) | noise (ppbv) | random (ppbv) | syst (ppbv) | total (ppbv) |
|---------------|--------------------|-------------|---------------|------------|--------------|---------------|-------------|----------------|--------------|--------------|---------------|-------------|--------------|
| 45            | 182.34             | 0.20        | 0.07          | 2.49       | 0.22         | 1.06          | 6.14        | 41.93          | 2.15         | 5.29         | 13.63         | 40.62       | 42.85        |
| 50            | 196.97             | 0.33        | 0.08          | 1.69       | 0.22         | 1.70          | 4.62        | 45.34          | 3.03         | 8.38         | 14.30         | 44.25       | 46.50        |
| 55            | 178.21             | 0.57        | 0.09          | 2.70       | 0.24         | 2.16          | 5.16        | 39.92          | 4.02         | 10.85        | 14.00         | 39.63       | 42.03        |
| 60            | 160.29             | 0.56        | 0.06          | 3.34       | 0.14         | 2.04          | 3.50        | 37.35          | 3.95         | 12.53        | 15.21         | 36.94       | 39.95        |
| 65            | 116.28             | 0.43        | 0.06          | 2.98       | 0.17         | 2.90          | 1.89        | 28.95          | 3.17         | 18.99        | 20.68         | 28.32       | 35.07        |
| 70            | 68.55              | 0.34        | 0.13          | 0.99       | 0.39         | 3.30          | 1.57        | 20.32          | 2.45         | 25.17        | 26.69         | 18.84       | 32.67        |
| 74            | 45.67              | 0.61        | 0.28          | 1.71       | 1.08         | 5.50          | 3.77        | 19.37          | 2.07         | 38.05        | 40.36         | 15.73       | 43.32        |
| 80            | 39.15              | 0.68        | 0.29          | 2.34       | 1.17         | 7.02          | 4.27        | 15.01          | 1.42         | 43.43        | 44.90         | 13.13       | 46.78        |

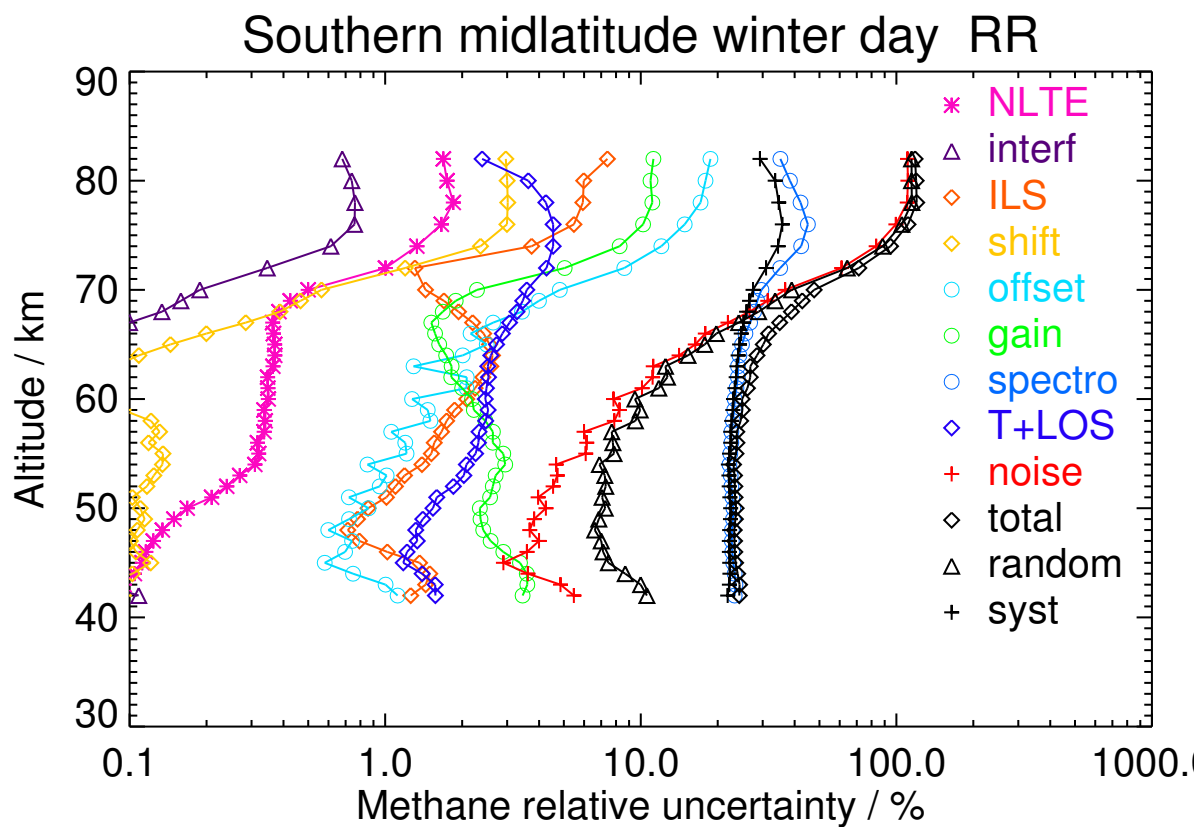

**Figure S121.** V8R\_CH4\_662 Southern midlatitude winter day

**Table S122.** Methane error budget for Southern midlatitude winter night. All uncertainties are  $1\sigma$ .

| altitude (km) | mean target (ppbv) | NLTE (ppbv) | interf (ppbv) | ILS (ppbv) | shift (ppbv) | offset (ppbv) | gain (ppbv) | spectro (ppbv) | T+LOS (ppbv) | noise (ppbv) | random (ppbv) | syst (ppbv) | total (ppbv) |
|---------------|--------------------|-------------|---------------|------------|--------------|---------------|-------------|----------------|--------------|--------------|---------------|-------------|--------------|
| 45            | 198.38             | 0.15        | 0.09          | 2.57       | 0.27         | 1.38          | 7.48        | 48.02          | 2.57         | 6.51         | 13.32         | 47.35       | 49.19        |
| 50            | 214.64             | 0.26        | 0.08          | 2.28       | 0.22         | 1.91          | 6.58        | 51.70          | 3.75         | 9.19         | 16.79         | 50.42       | 53.14        |
| 55            | 182.38             | 0.36        | 0.09          | 2.72       | 0.20         | 2.42          | 5.45        | 44.03          | 4.32         | 11.71        | 16.16         | 43.32       | 46.24        |
| 60            | 154.39             | 0.40        | 0.05          | 3.48       | 0.13         | 2.21          | 3.36        | 38.22          | 3.59         | 12.28        | 15.03         | 37.77       | 40.65        |
| 65            | 124.87             | 0.42        | 0.09          | 2.84       | 0.27         | 2.68          | 1.62        | 33.46          | 3.70         | 20.10        | 23.60         | 31.59       | 39.44        |
| 70            | 81.11              | 0.50        | 0.18          | 1.12       | 0.58         | 3.79          | 2.91        | 22.61          | 3.37         | 29.02        | 30.68         | 21.17       | 37.27        |
| 74            | 50.56              | 0.50        | 0.28          | 1.20       | 0.91         | 6.22          | 4.63        | 16.27          | 2.86         | 44.05        | 45.57         | 14.12       | 47.71        |
| 80            | 39.48              | 0.42        | 0.27          | 1.53       | 0.83         | 6.25          | 4.67        | 11.59          | 1.85         | 41.86        | 42.86         | 10.83       | 44.21        |

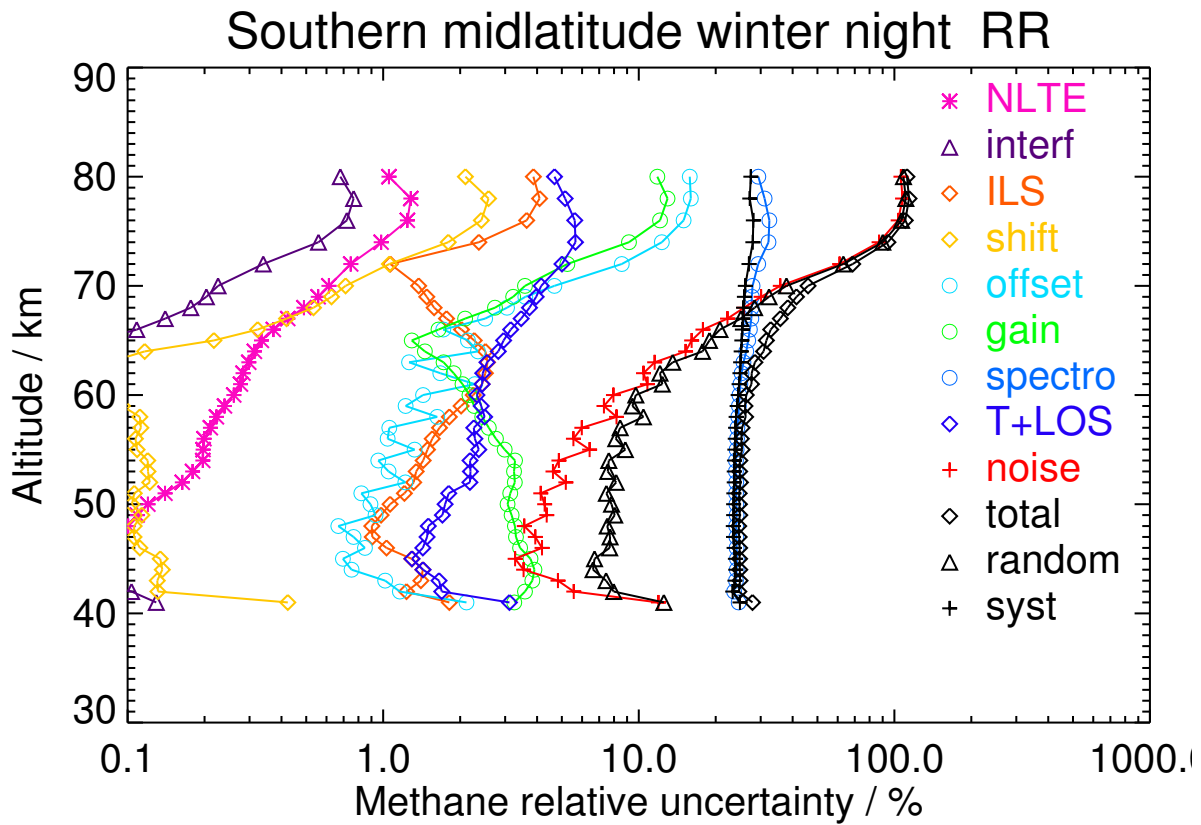

**Figure S122.** V8R\_CH4\_662 Southern midlatitude winter night

**Table S123.** Methane error budget for Southern midlatitude spring day. All uncertainties are  $1\sigma$ .

| altitude (km) | mean target (ppbv) | NLTE (ppbv) | interf (ppbv) | ILS (ppbv) | shift (ppbv) | offset (ppbv) | gain (ppbv) | spectro (ppbv) | T+LOS (ppbv) | noise (ppbv) | random (ppbv) | syst (ppbv) | total (ppbv) |
|---------------|--------------------|-------------|---------------|------------|--------------|---------------|-------------|----------------|--------------|--------------|---------------|-------------|--------------|
| 45            | 262.78             | 0.24        | 0.21          | 3.43       | 0.28         | 1.42          | 8.33        | 60.75          | 2.66         | 6.77         | 10.95         | 60.89       | 61.86        |
| 50            | 270.91             | 0.37        | 0.21          | 2.34       | 0.29         | 2.06          | 6.00        | 62.27          | 4.12         | 9.77         | 13.80         | 62.01       | 63.53        |
| 55            | 241.72             | 0.66        | 0.09          | 3.97       | 0.34         | 2.98          | 6.97        | 53.37          | 5.50         | 10.96        | 14.40         | 53.53       | 55.43        |
| 60            | 212.92             | 0.75        | 0.14          | 5.93       | 0.33         | 3.31          | 6.31        | 47.34          | 5.46         | 11.96        | 15.23         | 47.63       | 50.01        |
| 65            | 160.71             | 0.43        | 0.03          | 5.11       | 0.17         | 3.70          | 2.81        | 38.66          | 4.29         | 20.04        | 21.98         | 38.46       | 44.30        |
| 70            | 86.66              | 0.50        | 0.16          | 1.09       | 0.50         | 2.98          | 2.33        | 25.33          | 3.09         | 27.03        | 28.64         | 24.04       | 37.39        |
| 74            | 48.81              | 1.14        | 0.35          | 3.13       | 1.11         | 4.95          | 6.39        | 19.49          | 3.09         | 37.77        | 39.34         | 18.61       | 43.52        |
| 80            | 35.28              | 1.62        | 0.51          | 5.03       | 1.79         | 5.79          | 9.14        | 18.23          | 2.34         | 36.83        | 39.72         | 16.29       | 42.93        |

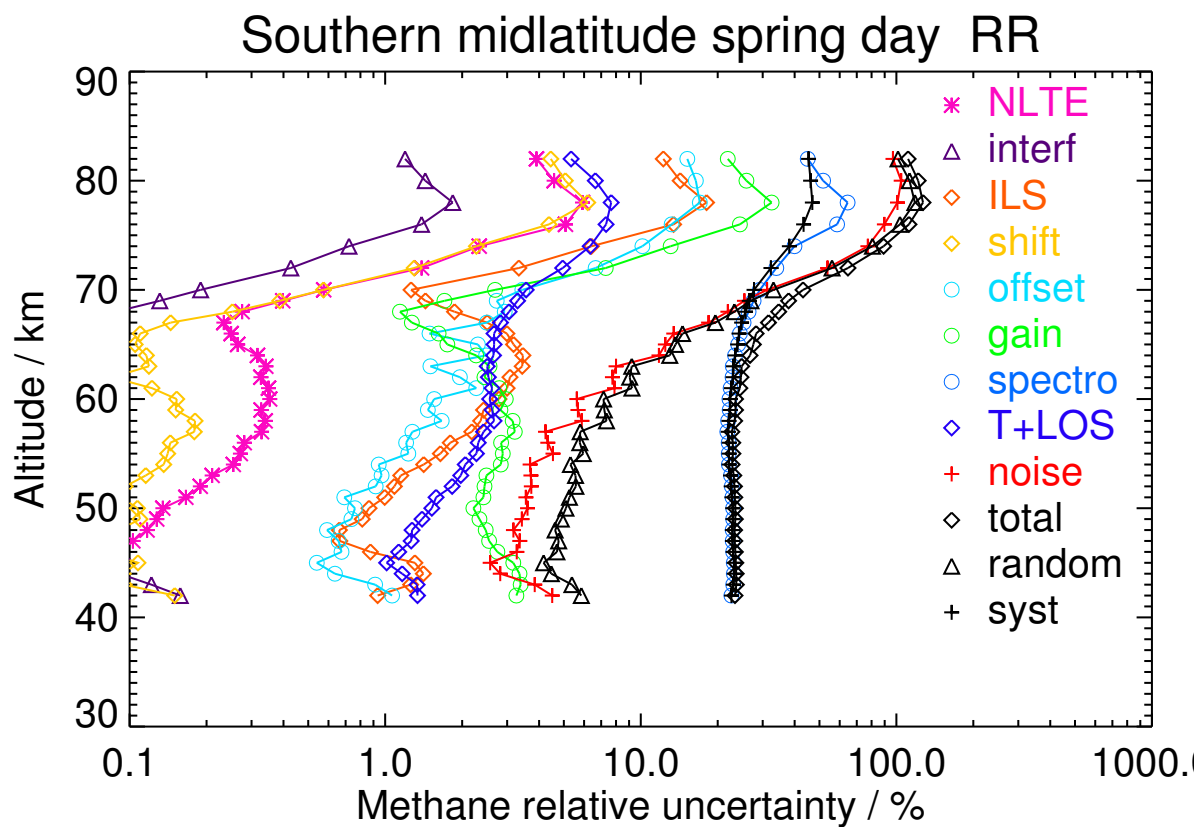

**Figure S123.** V8R\_CH4\_662 Southern midlatitude spring day

**Table S124.** Methane error budget for Southern midlatitude spring night. All uncertainties are  $1\sigma$ .

| altitude (km) | mean target (ppbv) | NLTE (ppbv) | interf (ppbv) | ILS (ppbv) | shift (ppbv) | offset (ppbv) | gain (ppbv) | spectro (ppbv) | T+LOS (ppbv) | noise (ppbv) | random (ppbv) | syst (ppbv) | total (ppbv) |
|---------------|--------------------|-------------|---------------|------------|--------------|---------------|-------------|----------------|--------------|--------------|---------------|-------------|--------------|
| 45            | 260.93             | 0.12        | 0.17          | 3.82       | 0.30         | 1.40          | 8.71        | 60.85          | 2.60         | 6.51         | 9.33          | 61.29       | 62.00        |
| 50            | 255.58             | 0.19        | 0.19          | 2.40       | 0.28         | 1.75          | 5.69        | 58.32          | 3.77         | 8.62         | 11.88         | 58.22       | 59.42        |
| 55            | 242.49             | 0.39        | 0.12          | 4.65       | 0.37         | 3.12          | 7.57        | 53.78          | 5.86         | 11.38        | 14.38         | 54.21       | 56.08        |
| 60            | 214.48             | 0.42        | 0.15          | 6.62       | 0.31         | 3.61          | 6.50        | 48.11          | 5.81         | 12.56        | 15.32         | 48.69       | 51.04        |
| 65            | 166.07             | 0.25        | 0.05          | 5.87       | 0.21         | 3.58          | 3.25        | 40.64          | 5.15         | 19.69        | 23.09         | 39.88       | 46.09        |
| 70            | 86.97              | 0.55        | 0.20          | 0.99       | 0.58         | 3.09          | 2.83        | 26.25          | 3.85         | 27.98        | 30.28         | 24.27       | 38.81        |
| 74            | 52.11              | 0.96        | 0.38          | 3.37       | 1.15         | 4.94          | 6.63        | 21.29          | 3.91         | 38.39        | 40.65         | 19.28       | 45.00        |
| 80            | 43.07              | 1.89        | 0.50          | 4.78       | 1.94         | 6.53          | 8.94        | 22.24          | 3.08         | 44.79        | 48.36         | 18.02       | 51.61        |
| 84            | 32.51              | 0.76        | 0.27          | 2.79       | 1.10         | 5.81          | 4.96        | 13.03          | 1.21         | 33.28        | 33.84         | 14.20       | 36.70        |

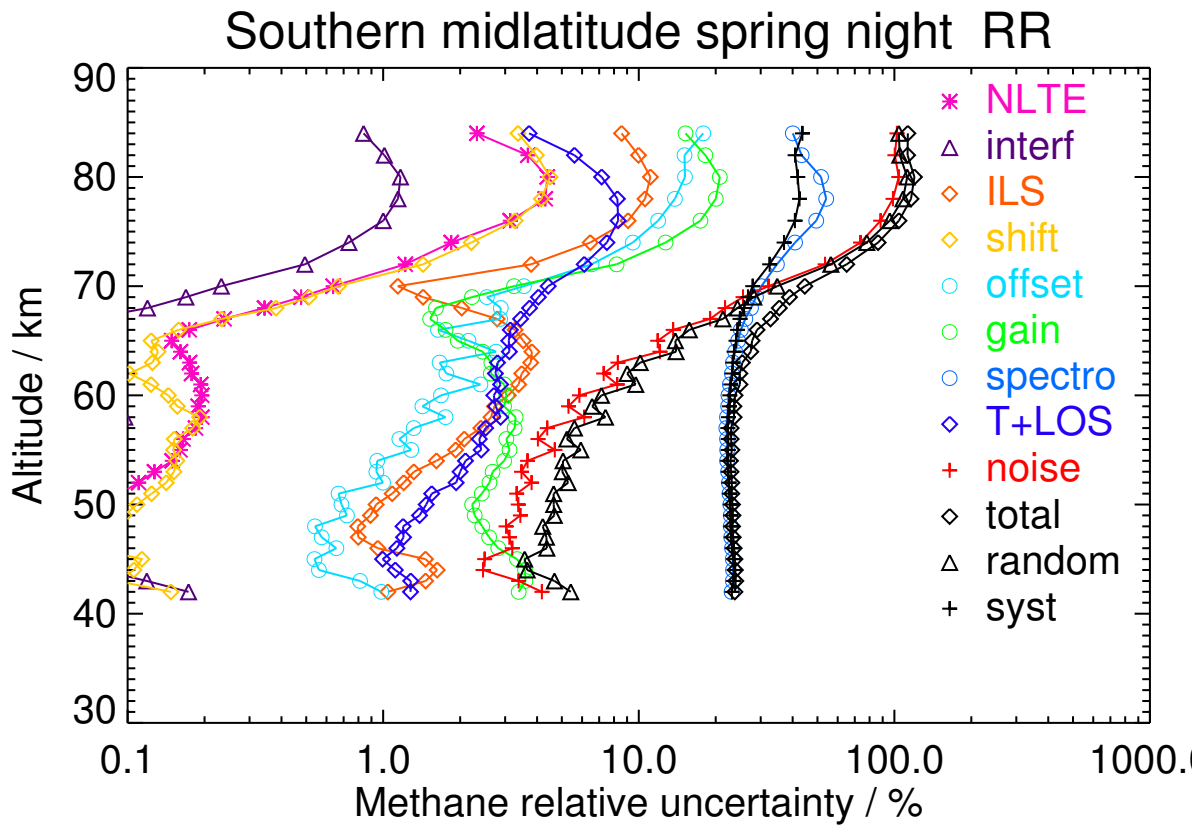

**Figure S124.** V8R\_CH4\_662 Southern midlatitude spring night

**Table S125.** Methane error budget for Southern midlatitude summer day. All uncertainties are  $1\sigma$ .

| altitude (km) | mean target (ppbv) | NLTE (ppbv) | interf (ppbv) | ILS (ppbv) | shift (ppbv) | offset (ppbv) | gain (ppbv) | spectro (ppbv) | T+LOS (ppbv) | noise (ppbv) | random (ppbv) | syst (ppbv) | total (ppbv) |
|---------------|--------------------|-------------|---------------|------------|--------------|---------------|-------------|----------------|--------------|--------------|---------------|-------------|--------------|
| 45            | 206.61             | 0.17        | 0.16          | 4.49       | 0.41         | 1.15          | 7.11        | 49.43          | 1.73         | 5.66         | 18.16         | 47.12       | 50.50        |
| 50            | 132.21             | 0.13        | 0.10          | 1.70       | 0.13         | 0.80          | 2.53        | 32.87          | 1.51         | 4.21         | 14.11         | 30.19       | 33.33        |
| 55            | 152.08             | 0.34        | 0.07          | 2.00       | 0.45         | 2.01          | 4.17        | 39.33          | 2.93         | 6.32         | 22.15         | 33.63       | 40.27        |
| 60            | 178.23             | 0.52        | 0.17          | 6.01       | 0.37         | 3.01          | 5.75        | 41.77          | 4.13         | 9.22         | 19.94         | 39.09       | 43.88        |
| 65            | 128.82             | 0.26        | 0.03          | 4.26       | 0.12         | 3.34          | 2.22        | 32.04          | 3.33         | 16.06        | 19.55         | 30.78       | 36.46        |
| 70            | 108.09             | 0.52        | 0.11          | 1.38       | 0.33         | 3.38          | 1.43        | 28.59          | 3.21         | 29.48        | 31.26         | 27.11       | 41.38        |
| 74            | 95.16              | 1.91        | 0.46          | 3.09       | 1.28         | 6.22          | 4.74        | 32.89          | 2.49         | 50.19        | 52.94         | 29.66       | 60.69        |
| 80            | 70.98              | 3.91        | 0.99          | 6.74       | 3.27         | 9.47          | 10.61       | 35.38          | 0.10         | 69.00        | 72.50         | 32.13       | 79.30        |
| 84            | 67.66              | 4.18        | 0.90          | 5.74       | 3.19         | 10.32         | 9.13        | 28.60          | 0.22         | 67.88        | 70.59         | 26.37       | 75.35        |

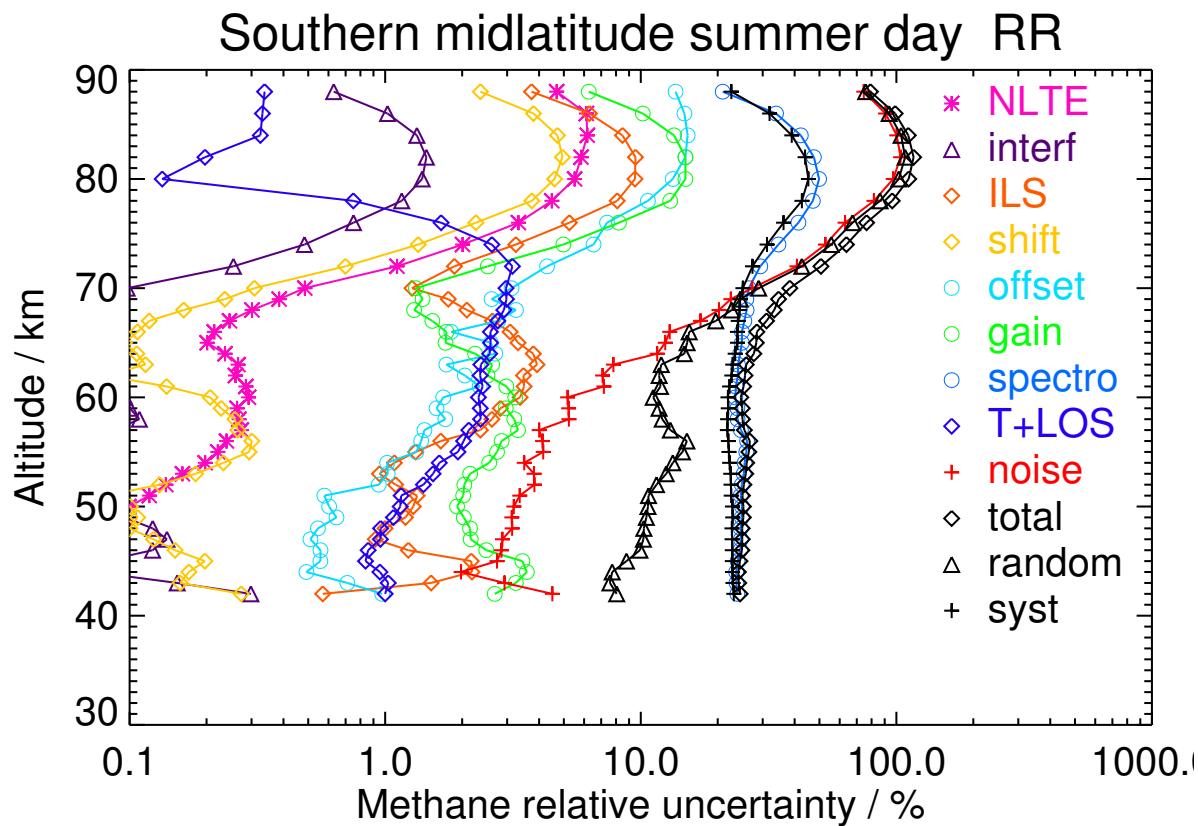

**Figure S125.** V8R\_CH4\_662 Southern midlatitude summer day



**Table S126.** Methane error budget for Southern midlatitude summer night. All uncertainties are  $1\sigma$ .

| altitude (km) | mean target (ppbv) | NLTE (ppbv) | interf (ppbv) | ILS (ppbv) | shift (ppbv) | offset (ppbv) | gain (ppbv) | spectro (ppbv) | T+LOS (ppbv) | noise (ppbv) | random (ppbv) | syst (ppbv) | total (ppbv) |
|---------------|--------------------|-------------|---------------|------------|--------------|---------------|-------------|----------------|--------------|--------------|---------------|-------------|--------------|
| 45            | 268.32             | 0.12        | 0.23          | 5.09       | 0.49         | 1.58          | 10.45       | 69.71          | 2.48         | 7.02         | 31.76         | 63.59       | 71.08        |
| 50            | 202.24             | 0.19        | 0.10          | 3.49       | 0.60         | 2.10          | 8.45        | 56.84          | 3.25         | 6.50         | 34.16         | 46.96       | 58.07        |
| 55            | 179.43             | 0.19        | 0.16          | 4.63       | 0.56         | 2.94          | 8.25        | 46.70          | 4.37         | 8.26         | 26.84         | 40.58       | 48.65        |
| 60            | 170.93             | 0.14        | 0.13          | 5.29       | 0.28         | 3.06          | 5.42        | 40.65          | 4.43         | 10.08        | 17.02         | 39.38       | 42.90        |
| 65            | 172.43             | 0.23        | 0.05          | 5.75       | 0.21         | 4.33          | 3.19        | 42.93          | 5.49         | 21.08        | 25.75         | 41.43       | 48.78        |
| 70            | 125.76             | 0.93        | 0.26          | 1.63       | 0.64         | 3.74          | 2.92        | 34.80          | 5.34         | 35.56        | 38.47         | 32.41       | 50.30        |
| 74            | 104.59             | 2.44        | 0.67          | 4.13       | 1.86         | 6.97          | 8.11        | 36.18          | 4.46         | 59.21        | 62.89         | 31.95       | 70.54        |
| 80            | 61.69              | 2.71        | 0.48          | 2.42       | 1.55         | 10.17         | 5.98        | 20.94          | 0.40         | 67.80        | 69.50         | 18.98       | 72.04        |
| 84            | 55.31              | 2.34        | 0.34          | 1.75       | 1.19         | 9.72          | 4.06        | 14.37          | 0.05         | 57.10        | 58.30         | 13.78       | 59.91        |

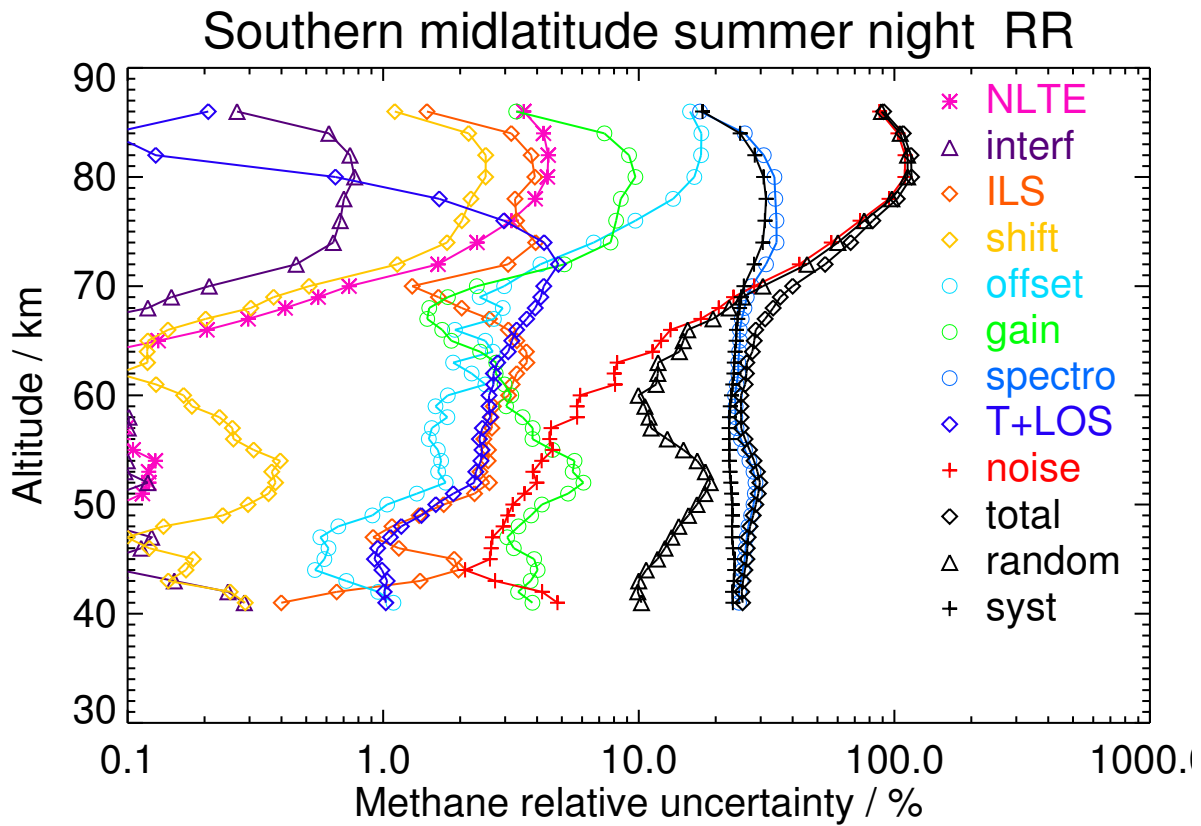

**Figure S126.** V8R\_CH4\_662 Southern midlatitude summer night

**Table S127.** Methane error budget for Southern midlatitude autumn day. All uncertainties are  $1\sigma$ .

| altitude (km) | mean target (ppbv) | NLTE (ppbv) | interf (ppbv) | ILS (ppbv) | shift (ppbv) | offset (ppbv) | gain (ppbv) | spectro (ppbv) | T+LOS (ppbv) | noise (ppbv) | random (ppbv) | syst (ppbv) | total (ppbv) |
|---------------|--------------------|-------------|---------------|------------|--------------|---------------|-------------|----------------|--------------|--------------|---------------|-------------|--------------|
| 45            | 306.08             | 0.40        | 0.27          | 4.56       | 0.30         | 2.18          | 13.67       | 82.30          | 4.11         | 9.81         | 41.94         | 73.08       | 84.26        |
| 50            | 292.80             | 0.58        | 0.15          | 2.50       | 0.30         | 3.00          | 8.60        | 70.07          | 5.59         | 13.83        | 26.73         | 67.14       | 72.27        |
| 55            | 283.20             | 1.03        | 0.12          | 3.52       | 0.27         | 3.88          | 9.91        | 63.31          | 8.05         | 15.49        | 21.52         | 63.06       | 66.63        |
| 60            | 230.78             | 0.91        | 0.11          | 5.14       | 0.21         | 3.37          | 7.00        | 53.50          | 7.46         | 16.57        | 21.32         | 53.16       | 57.27        |
| 65            | 124.32             | 0.36        | 0.05          | 3.64       | 0.15         | 3.28          | 2.17        | 33.03          | 3.96         | 19.79        | 23.83         | 30.98       | 39.08        |
| 70            | 46.44              | 0.22        | 0.07          | 1.11       | 0.19         | 2.57          | 1.48        | 13.09          | 1.57         | 17.76        | 18.82         | 12.04       | 22.34        |
| 74            | 39.85              | 1.23        | 0.18          | 1.26       | 0.50         | 4.59          | 3.89        | 17.54          | 2.17         | 30.89        | 34.28         | 11.44       | 36.14        |
| 80            | 40.91              | 1.42        | 0.32          | 2.77       | 1.13         | 6.72          | 7.49        | 15.24          | 3.08         | 43.56        | 44.90         | 15.34       | 47.45        |

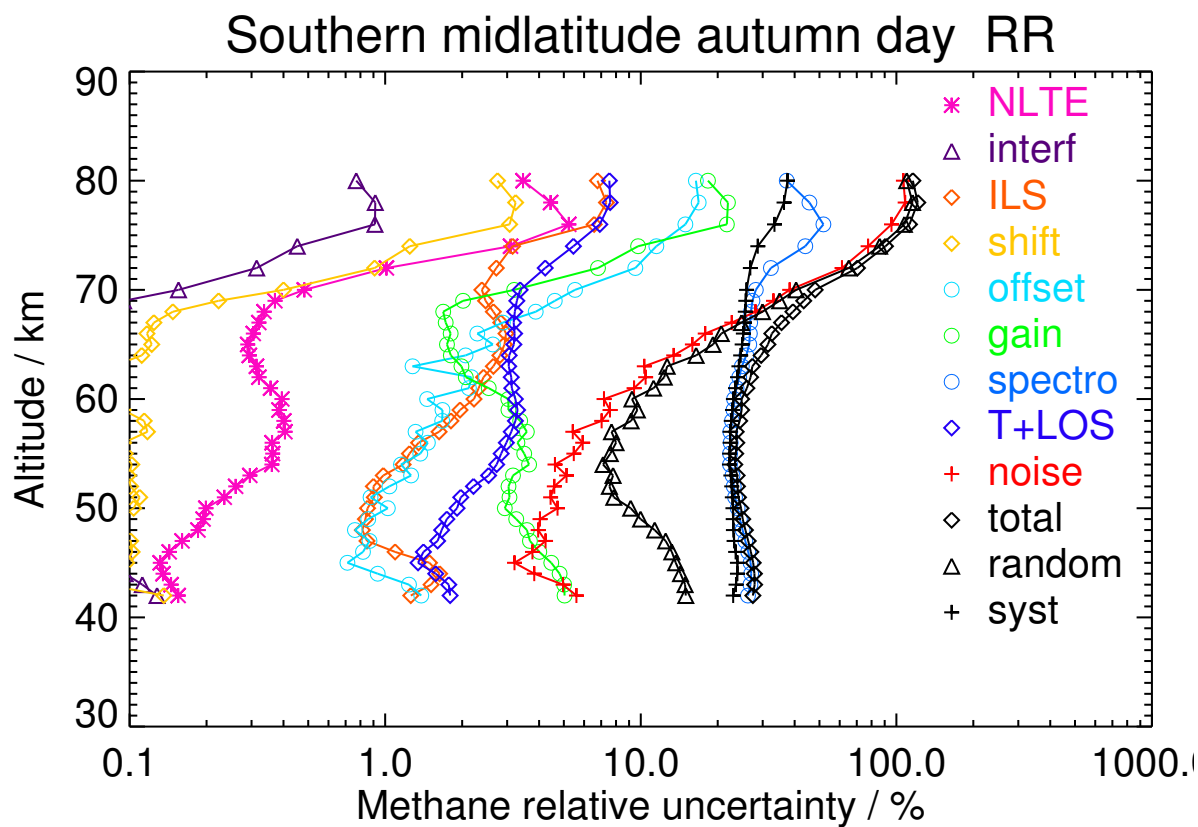

**Figure S127.** V8R\_CH4\_662 Southern midlatitude autumn day

**Table S128.** Methane error budget for Southern midlatitude autumn night. All uncertainties are  $1\sigma$ .

| altitude (km) | mean target (ppbv) | NLTE (ppbv) | interf (ppbv) | ILS (ppbv) | shift (ppbv) | offset (ppbv) | gain (ppbv) | spectro (ppbv) | T+LOS (ppbv) | noise (ppbv) | random (ppbv) | syst (ppbv) | total (ppbv) |
|---------------|--------------------|-------------|---------------|------------|--------------|---------------|-------------|----------------|--------------|--------------|---------------|-------------|--------------|
| 45            | 402.04             | 0.18        | 0.36          | 5.55       | 0.31         | 2.35          | 15.07       | 96.15          | 4.70         | 11.10        | 38.02         | 90.60       | 98.25        |
| 50            | 349.56             | 0.28        | 0.20          | 2.71       | 0.27         | 3.16          | 9.21        | 79.22          | 6.48         | 14.37        | 25.32         | 77.36       | 81.40        |
| 55            | 309.98             | 0.53        | 0.17          | 4.97       | 0.32         | 4.61          | 11.72       | 67.57          | 9.64         | 17.51        | 22.66         | 68.08       | 71.76        |
| 60            | 256.62             | 0.41        | 0.15          | 6.54       | 0.24         | 4.20          | 8.17        | 58.18          | 9.20         | 18.84        | 23.51         | 58.30       | 62.86        |
| 65            | 142.44             | 0.35        | 0.11          | 3.81       | 0.30         | 3.60          | 2.08        | 37.51          | 5.20         | 23.27        | 26.92         | 35.81       | 44.80        |
| 70            | 55.90              | 0.24        | 0.09          | 1.04       | 0.22         | 3.09          | 1.51        | 16.02          | 2.41         | 21.81        | 22.87         | 15.11       | 27.41        |
| 74            | 35.53              | 0.48        | 0.21          | 1.54       | 0.59         | 4.69          | 4.37        | 13.08          | 2.39         | 30.97        | 32.61         | 10.79       | 34.35        |
| 80            | 34.40              | 0.75        | 0.32          | 2.57       | 0.94         | 5.86          | 7.39        | 11.85          | 2.91         | 35.86        | 37.41         | 11.50       | 39.14        |

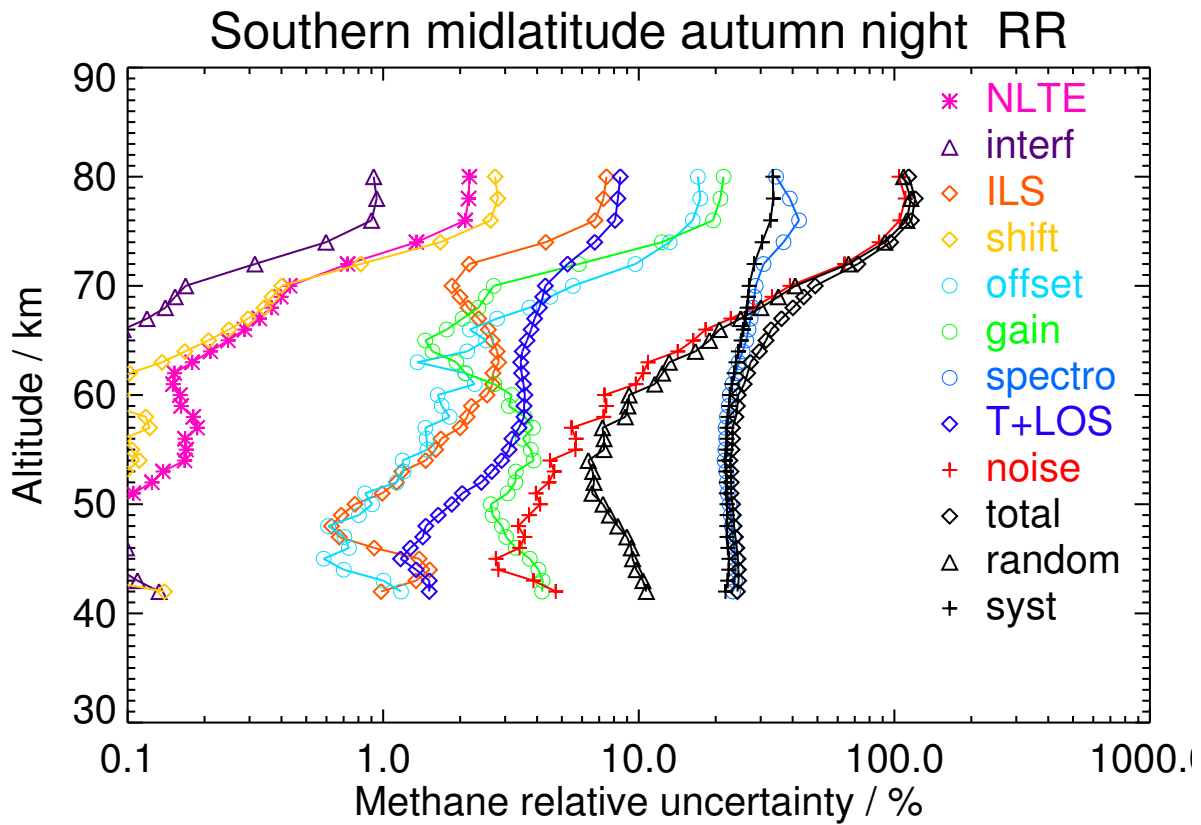

**Figure S128.** V8R\_CH4\_662 Southern midlatitude autumn night

**Table S129.** Methane error budget for Southern polar winter day. All uncertainties are  $1\sigma$ .

| altitude (km) | mean target (ppbv) | NLTE (ppbv) | interf (ppbv) | ILS (ppbv) | shift (ppbv) | offset (ppbv) | gain (ppbv) | spectro (ppbv) | T+LOS (ppbv) | noise (ppbv) | random (ppbv) | syst (ppbv) | total (ppbv) |
|---------------|--------------------|-------------|---------------|------------|--------------|---------------|-------------|----------------|--------------|--------------|---------------|-------------|--------------|
| 45            | 195.99             | 0.21        | 0.07          | 2.78       | 0.38         | 1.08          | 5.56        | 45.35          | 2.35         | 5.19         | 9.67          | 45.12       | 46.15        |
| 50            | 171.05             | 0.24        | 0.07          | 2.09       | 0.29         | 1.16          | 3.39        | 40.42          | 2.29         | 6.11         | 8.87          | 40.19       | 41.16        |
| 55            | 141.72             | 0.40        | 0.06          | 2.41       | 0.24         | 1.16          | 3.08        | 32.59          | 2.17         | 6.90         | 9.04          | 32.40       | 33.64        |
| 60            | 116.49             | 0.45        | 0.04          | 2.85       | 0.14         | 1.05          | 2.13        | 27.58          | 2.09         | 8.67         | 10.50         | 27.28       | 29.23        |
| 65            | 82.13              | 0.43        | 0.03          | 2.24       | 0.11         | 2.08          | 1.21        | 20.52          | 1.62         | 14.32        | 15.48         | 20.00       | 25.29        |
| 70            | 50.45              | 0.22        | 0.11          | 0.68       | 0.45         | 2.69          | 1.22        | 15.72          | 1.34         | 19.61        | 20.76         | 14.55       | 25.36        |
| 74            | 47.85              | 0.48        | 0.31          | 2.39       | 1.35         | 5.17          | 4.08        | 24.05          | 2.01         | 36.71        | 40.73         | 17.94       | 44.51        |
| 80            | 217.34             | 14.53       | 2.11          | 9.42       | 9.33         | 19.63         | 20.42       | 171.87         | 11.11        | 148.18       | 211.76        | 89.28       | 229.81       |
| 84            | 258.41             | 7.28        | 0.40          | 1.82       | 1.94         | 29.27         | 3.08        | 65.18          | 9.23         | 210.90       | 213.13        | 65.68       | 223.02       |

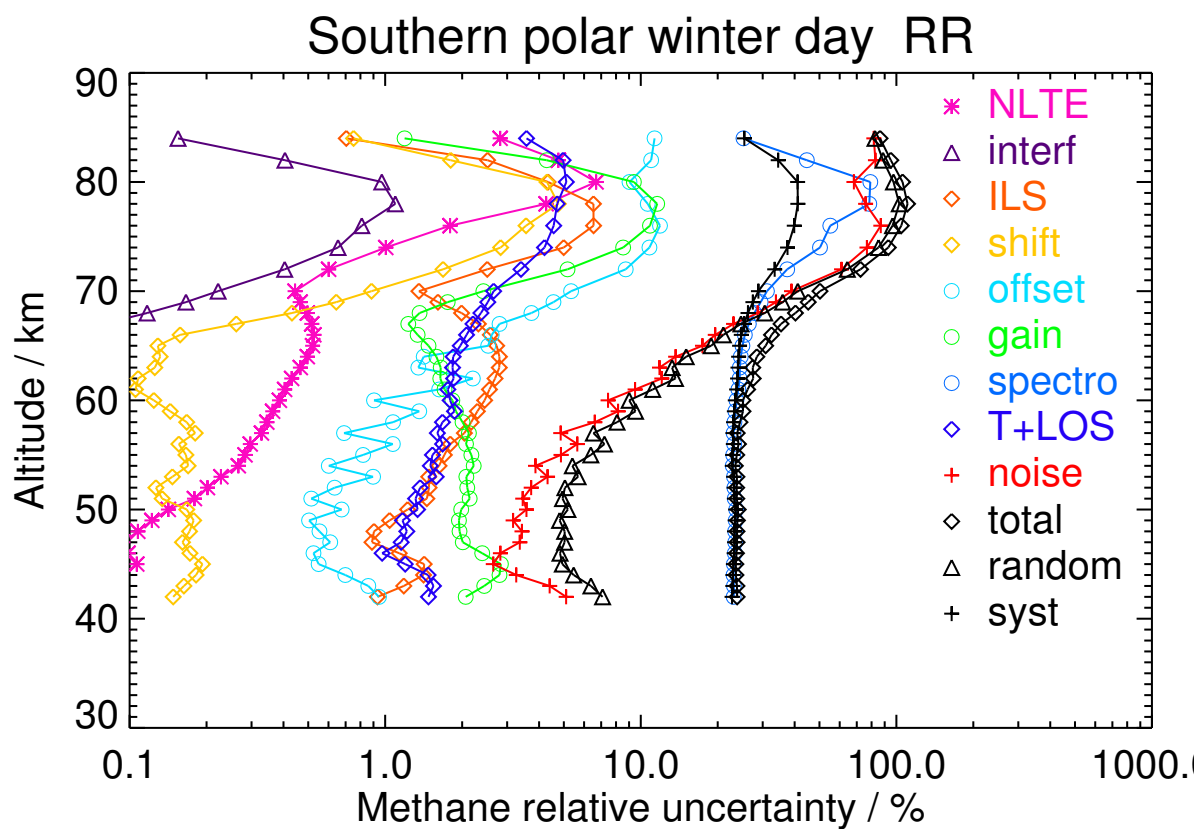

**Figure S129.** V8R\_CH4\_662 Southern polar winter day

**Table S130.** Methane error budget for Southern polar winter night. All uncertainties are  $1\sigma$ .

| altitude (km) | mean target (ppbv) | NLTE (ppbv) | interf (ppbv) | ILS (ppbv) | shift (ppbv) | offset (ppbv) | gain (ppbv) | spectro (ppbv) | T+LOS (ppbv) | noise (ppbv) | random (ppbv) | syst (ppbv) | total (ppbv) |
|---------------|--------------------|-------------|---------------|------------|--------------|---------------|-------------|----------------|--------------|--------------|---------------|-------------|--------------|
| 45            | 128.79             | 0.15        | 0.04          | 1.68       | 0.21         | 0.72          | 3.46        | 29.66          | 1.67         | 3.94         | 5.79          | 29.66       | 30.22        |
| 50            | 122.94             | 0.18        | 0.04          | 1.08       | 0.13         | 1.01          | 2.44        | 29.69          | 1.72         | 6.19         | 8.46          | 29.32       | 30.51        |
| 55            | 102.04             | 0.28        | 0.02          | 1.40       | 0.11         | 0.99          | 1.84        | 25.54          | 1.56         | 7.12         | 9.99          | 24.73       | 26.68        |
| 60            | 82.54              | 0.38        | 0.02          | 1.84       | 0.09         | 0.90          | 1.40        | 21.06          | 1.40         | 8.13         | 10.10         | 20.40       | 22.76        |
| 65            | 54.27              | 0.41        | 0.04          | 1.24       | 0.05         | 1.55          | 0.76        | 14.81          | 1.07         | 11.25        | 12.65         | 13.84       | 18.75        |
| 70            | 39.64              | 0.40        | 0.10          | 0.49       | 0.35         | 2.75          | 0.70        | 12.53          | 1.11         | 17.16        | 18.47         | 10.97       | 21.48        |
| 74            | 33.87              | 0.47        | 0.17          | 0.98       | 0.69         | 4.99          | 1.58        | 12.44          | 1.32         | 31.31        | 32.60         | 10.14       | 34.14        |
| 80            | 25.49              | 0.27        | 0.06          | 0.07       | 0.23         | 4.86          | 0.46        | 5.59           | 0.82         | 27.62        | 28.06         | 5.62        | 28.61        |

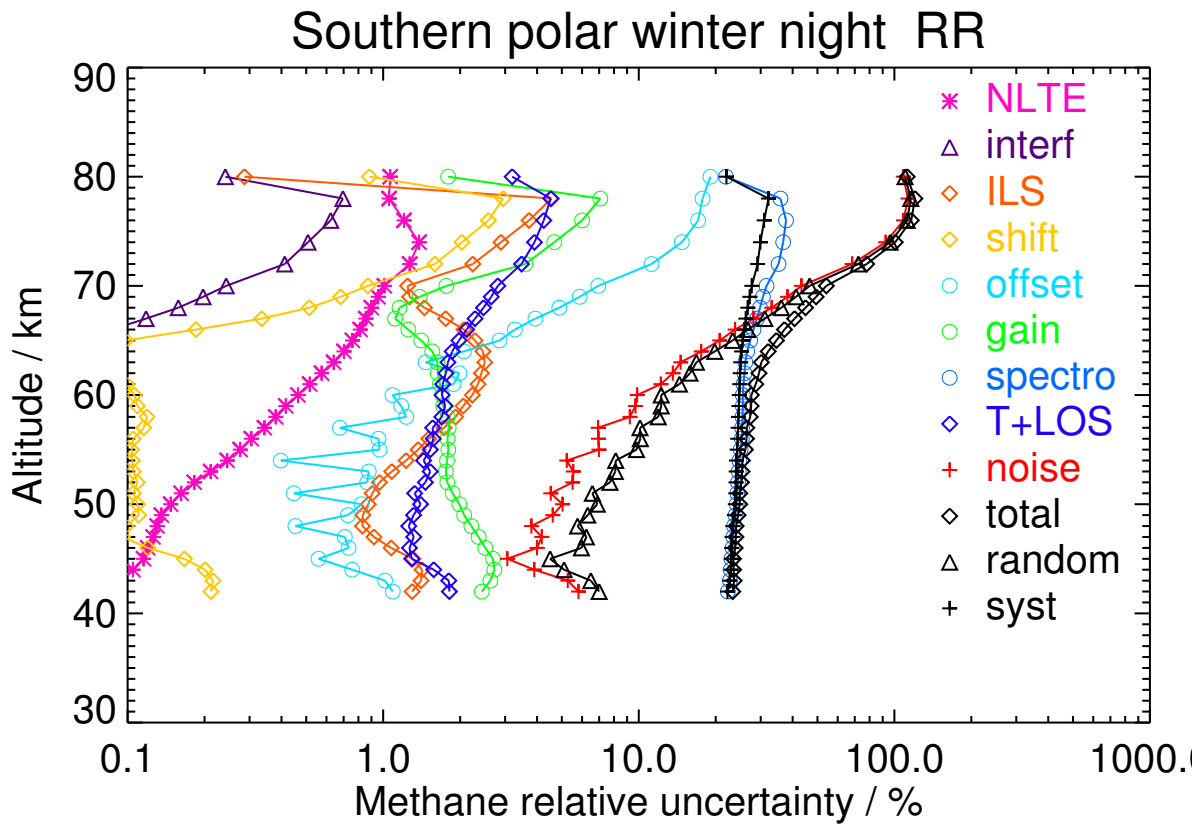

**Figure S130.** V8R\_CH4\_662 Southern polar winter night

**Table S131.** Methane error budget for Southern polar spring day. All uncertainties are  $1\sigma$ .

| altitude (km) | mean target (ppbv) | NLTE (ppbv) | interf (ppbv) | ILS (ppbv) | shift (ppbv) | offset (ppbv) | gain (ppbv) | spectro (ppbv) | T+LOS (ppbv) | noise (ppbv) | random (ppbv) | syst (ppbv) | total (ppbv) |
|---------------|--------------------|-------------|---------------|------------|--------------|---------------|-------------|----------------|--------------|--------------|---------------|-------------|--------------|
| 45            | 234.96             | 0.15        | 0.09          | 3.72       | 0.30         | 1.13          | 7.17        | 53.44          | 2.10         | 5.28         | 7.38          | 53.85       | 54.35        |
| 50            | 238.69             | 0.21        | 0.16          | 2.52       | 0.32         | 1.42          | 4.61        | 54.14          | 3.02         | 6.60         | 8.90          | 54.17       | 54.89        |
| 55            | 223.80             | 0.35        | 0.07          | 4.25       | 0.45         | 2.26          | 5.83        | 49.32          | 4.06         | 8.08         | 9.93          | 49.73       | 50.71        |
| 60            | 210.07             | 0.42        | 0.15          | 6.70       | 0.47         | 2.92          | 6.33        | 46.05          | 4.65         | 9.21         | 11.28         | 46.84       | 48.17        |
| 65            | 195.58             | 0.30        | 0.06          | 7.51       | 0.23         | 4.92          | 4.30        | 45.64          | 4.98         | 19.96        | 21.94         | 46.09       | 51.05        |
| 70            | 146.62             | 0.81        | 0.10          | 2.69       | 0.42         | 4.09          | 2.26        | 37.63          | 4.76         | 34.23        | 36.25         | 36.42       | 51.39        |
| 74            | 96.53              | 2.42        | 0.40          | 4.29       | 1.72         | 5.98          | 6.66        | 34.08          | 4.20         | 52.94        | 55.15         | 32.38       | 63.95        |
| 80            | 62.31              | 4.16        | 0.56          | 6.08       | 2.79         | 7.85          | 9.49        | 30.16          | 2.46         | 57.95        | 61.93         | 25.54       | 66.99        |
| 84            | 128.09             | 22.43       | 0.53          | 5.11       | 3.60         | 14.36         | 8.96        | 61.00          | 3.76         | 93.37        | 108.39        | 39.17       | 115.25       |

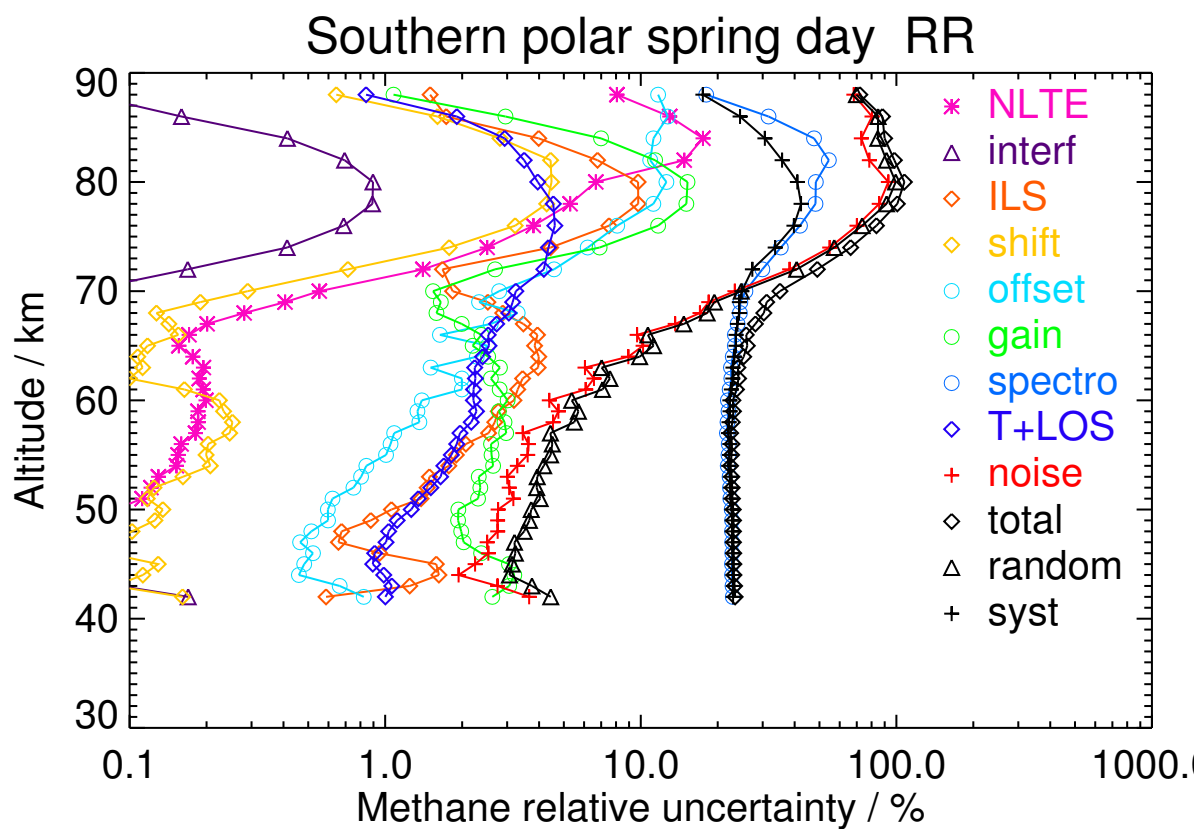

**Figure S131.** V8R\_CH4\_662 Southern polar spring day

**Table S132.** Methane error budget for Southern polar spring night. All uncertainties are  $1\sigma$ .

| altitude (km) | mean target (ppbv) | NLTE (ppbv) | interf (ppbv) | ILS (ppbv) | shift (ppbv) | offset (ppbv) | gain (ppbv) | spectro (ppbv) | T+LOS (ppbv) | noise (ppbv) | random (ppbv) | syst (ppbv) | total (ppbv) |
|---------------|--------------------|-------------|---------------|------------|--------------|---------------|-------------|----------------|--------------|--------------|---------------|-------------|--------------|
| 45            | 265.66             | 0.15        | 0.13          | 4.01       | 0.37         | 1.53          | 10.14       | 64.17          | 2.87         | 6.57         | 10.20         | 64.70       | 65.50        |
| 50            | 267.20             | 0.20        | 0.20          | 2.98       | 0.44         | 1.81          | 6.51        | 62.69          | 3.92         | 8.48         | 13.52         | 62.37       | 63.81        |
| 55            | 248.80             | 0.33        | 0.13          | 4.57       | 0.46         | 3.18          | 8.45        | 56.32          | 5.84         | 11.63        | 15.86         | 56.51       | 58.69        |
| 60            | 216.73             | 0.33        | 0.14          | 6.47       | 0.34         | 3.49          | 6.97        | 50.16          | 6.10         | 13.05        | 17.36         | 50.25       | 53.17        |
| 65            | 160.58             | 0.43        | 0.07          | 4.95       | 0.28         | 3.99          | 2.42        | 40.40          | 5.19         | 22.54        | 25.63         | 39.46       | 47.05        |
| 70            | 85.84              | 0.83        | 0.20          | 1.03       | 0.66         | 3.16          | 3.41        | 24.83          | 3.96         | 28.69        | 30.31         | 23.67       | 38.46        |
| 74            | 47.77              | 1.17        | 0.29          | 2.29       | 1.08         | 5.10          | 5.74        | 17.47          | 3.26         | 37.68        | 39.36         | 15.92       | 42.46        |
| 80            | 44.18              | 2.43        | 0.57          | 5.45       | 2.57         | 7.34          | 11.48       | 19.45          | 2.70         | 48.06        | 51.70         | 15.83       | 54.07        |
| 84            | 51.96              | 1.97        | 0.42          | 4.10       | 1.95         | 6.39          | 8.65        | 12.90          | 1.72         | 40.87        | 41.48         | 16.10       | 44.50        |

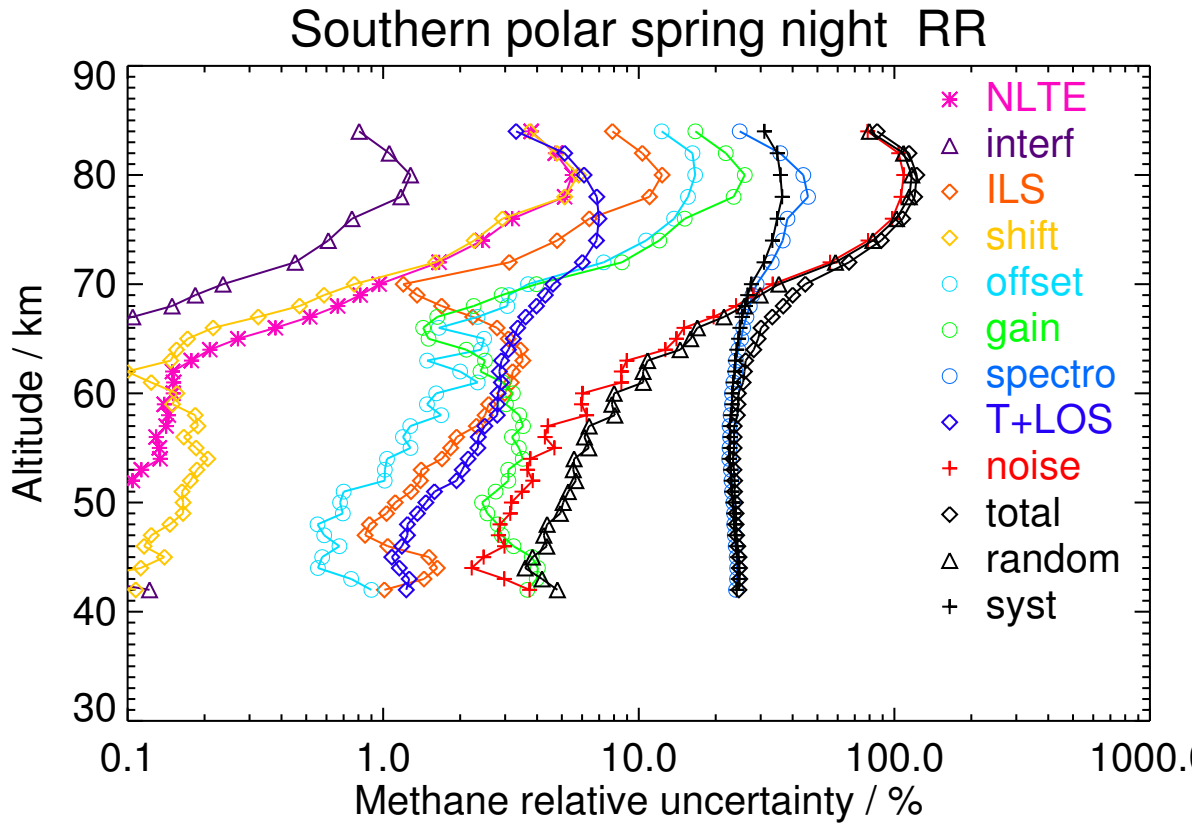

**Figure S132.** V8R\_CH4\_662 Southern polar spring night

**Table S133.** Methane error budget for Southern polar summer day. All uncertainties are  $1\sigma$ .

| altitude (km) | mean target (ppbv) | NLTE (ppbv) | interf (ppbv) | ILS (ppbv) | shift (ppbv) | offset (ppbv) | gain (ppbv) | spectro (ppbv) | T+LOS (ppbv) | noise (ppbv) | random (ppbv) | syst (ppbv) | total (ppbv) |
|---------------|--------------------|-------------|---------------|------------|--------------|---------------|-------------|----------------|--------------|--------------|---------------|-------------|--------------|
| 45            | 209.26             | 0.16        | 0.16          | 6.05       | 0.73         | 1.20          | 7.28        | 49.04          | 1.67         | 7.07         | 8.77          | 49.72       | 50.49        |
| 50            | 95.95              | 0.05        | 0.06          | 0.80       | 0.14         | 0.43          | 0.96        | 22.59          | 0.82         | 2.64         | 3.27          | 22.56       | 22.80        |
| 55            | 91.96              | 0.06        | 0.03          | 1.16       | 0.13         | 0.73          | 1.38        | 21.28          | 1.05         | 3.16         | 4.09          | 21.24       | 21.63        |
| 60            | 109.18             | 0.09        | 0.06          | 2.58       | 0.33         | 1.19          | 2.22        | 24.96          | 1.69         | 4.31         | 5.93          | 24.94       | 25.64        |
| 65            | 131.79             | 0.15        | 0.06          | 4.57       | 0.09         | 3.32          | 2.65        | 31.18          | 2.54         | 11.89        | 13.44         | 31.28       | 34.05        |
| 70            | 149.79             | 0.58        | 0.15          | 5.16       | 0.41         | 4.97          | 3.28        | 36.23          | 3.35         | 28.42        | 30.50         | 35.55       | 46.84        |
| 74            | 120.51             | 1.64        | 0.44          | 4.53       | 1.11         | 7.31          | 3.94        | 36.26          | 2.03         | 53.11        | 55.60         | 33.80       | 65.06        |
| 80            | 132.15             | 6.56        | 0.95          | 7.39       | 3.81         | 8.50          | 8.07        | 45.24          | 1.06         | 78.66        | 81.20         | 43.51       | 92.12        |
| 84            | 131.99             | 12.08       | 0.75          | 4.51       | 4.68         | 14.89         | 6.68        | 43.22          | 1.74         | 102.19       | 106.11        | 38.85       | 113.00       |

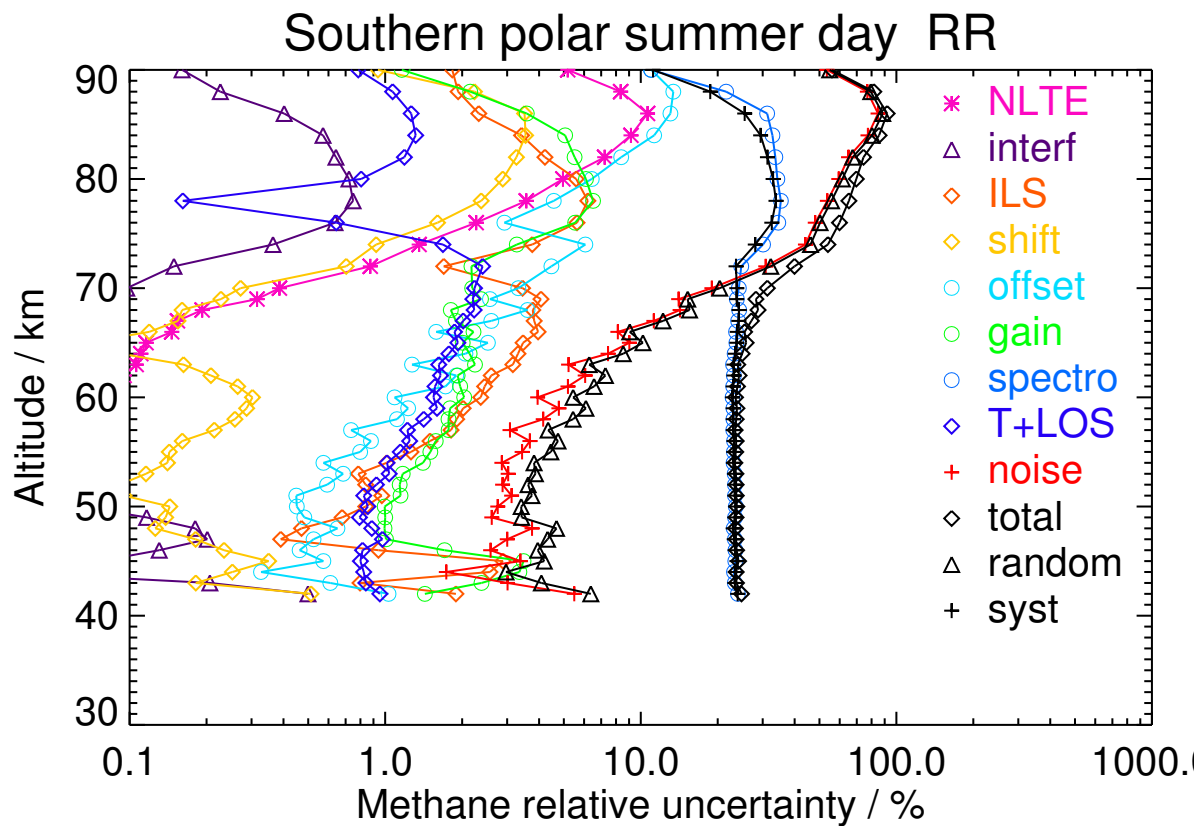

**Figure S133.** V8R\_CH4\_662 Southern polar summer day



**Table S134.** Methane error budget for Southern polar summer night. All uncertainties are  $1\sigma$ .

| altitude (km) | mean target (ppbv) | NLTE (ppbv) | interf (ppbv) | ILS (ppbv) | shift (ppbv) | offset (ppbv) | gain (ppbv) | spectro (ppbv) | T+LOS (ppbv) | noise (ppbv) | random (ppbv) | syst (ppbv) | total (ppbv) |
|---------------|--------------------|-------------|---------------|------------|--------------|---------------|-------------|----------------|--------------|--------------|---------------|-------------|--------------|
| 45            | 93.69              | 0.04        | 0.03          | 2.43       | 0.18         | 0.52          | 3.28        | 21.84          | 0.70         | 2.49         | 3.83          | 22.04       | 22.37        |
| 50            | 57.73              | 0.03        | 0.01          | 0.74       | 0.06         | 0.47          | 0.97        | 13.95          | 0.55         | 2.55         | 3.54          | 13.80       | 14.25        |
| 55            | 67.42              | 0.05        | 0.02          | 0.76       | 0.08         | 0.72          | 1.10        | 16.40          | 0.94         | 3.95         | 5.77          | 15.95       | 16.96        |
| 60            | 96.20              | 0.13        | 0.06          | 2.51       | 0.11         | 1.33          | 2.09        | 25.14          | 1.84         | 6.82         | 13.22         | 22.80       | 26.36        |
| 65            | 144.78             | 0.14        | 0.04          | 4.63       | 0.15         | 4.00          | 2.42        | 35.79          | 3.85         | 18.72        | 22.17         | 34.61       | 41.11        |
| 70            | 123.59             | 0.44        | 0.19          | 1.63       | 0.38         | 3.23          | 1.12        | 31.46          | 4.48         | 33.42        | 34.48         | 30.86       | 46.27        |
| 74            | 102.05             | 1.73        | 0.82          | 3.81       | 1.74         | 6.42          | 5.30        | 33.55          | 3.60         | 58.55        | 60.82         | 30.94       | 68.24        |
| 80            | 93.71              | 5.99        | 1.07          | 4.30       | 2.54         | 11.69         | 6.96        | 38.44          | 0.62         | 82.60        | 87.98         | 28.44       | 92.46        |
| 84            | 99.82              | 7.08        | 0.99          | 4.09       | 2.41         | 14.66         | 6.71        | 34.17          | 0.09         | 94.43        | 98.63         | 26.28       | 102.07       |

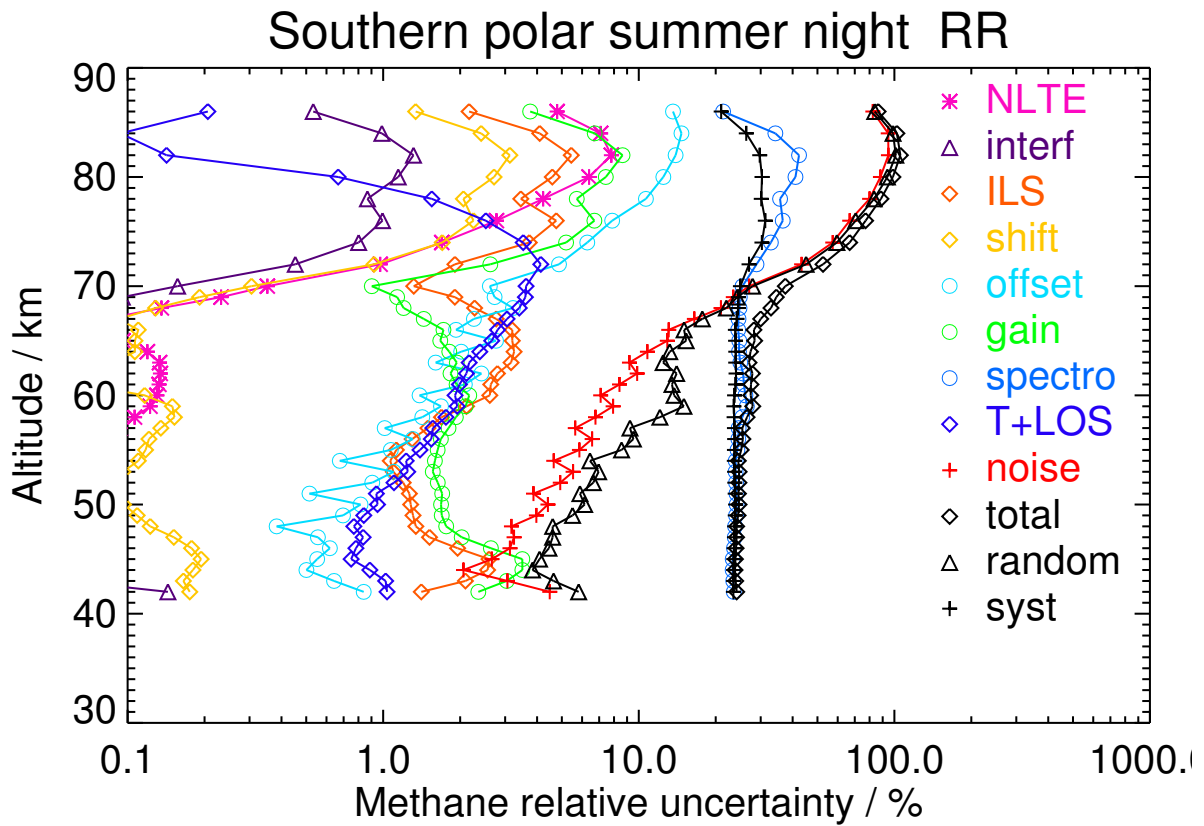

**Figure S134.** V8R\_CH4\_662 Southern polar summer night

**Table S135.** Methane error budget for Southern polar autumn day. All uncertainties are  $1\sigma$ .

| altitude (km) | mean target (ppbv) | NLTE (ppbv) | interf (ppbv) | ILS (ppbv) | shift (ppbv) | offset (ppbv) | gain (ppbv) | spectro (ppbv) | T+LOS (ppbv) | noise (ppbv) | random (ppbv) | syst (ppbv) | total (ppbv) |
|---------------|--------------------|-------------|---------------|------------|--------------|---------------|-------------|----------------|--------------|--------------|---------------|-------------|--------------|
| 45            | 86.21              | 0.07        | 0.03          | 0.89       | 0.15         | 0.81          | 2.57        | 21.12          | 1.45         | 5.14         | 9.70          | 19.71       | 21.97        |
| 50            | 154.95             | 0.23        | 0.04          | 1.08       | 0.19         | 1.51          | 3.08        | 35.99          | 2.60         | 8.21         | 12.05         | 35.18       | 37.18        |
| 55            | 197.82             | 0.49        | 0.04          | 2.25       | 0.23         | 1.54          | 3.65        | 45.34          | 3.64         | 9.58         | 12.38         | 45.04       | 46.71        |
| 60            | 149.27             | 0.55        | 0.03          | 3.35       | 0.10         | 1.62          | 2.75        | 36.13          | 3.20         | 10.96        | 15.59         | 34.84       | 38.17        |
| 65            | 85.25              | 0.37        | 0.04          | 2.29       | 0.08         | 2.24          | 1.12        | 22.65          | 2.09         | 15.46        | 17.57         | 21.44       | 27.72        |
| 70            | 42.57              | 0.18        | 0.06          | 0.72       | 0.18         | 2.68          | 0.36        | 12.86          | 1.26         | 17.84        | 18.78         | 11.85       | 22.21        |
| 74            | 36.29              | 0.33        | 0.11          | 0.45       | 0.42         | 4.48          | 0.77        | 18.28          | 1.48         | 27.85        | 31.79         | 11.05       | 33.66        |
| 80            | 50.94              | 0.18        | 0.15          | 0.30       | 0.62         | 8.22          | 1.53        | 19.88          | 1.94         | 51.06        | 53.14         | 15.91       | 55.47        |

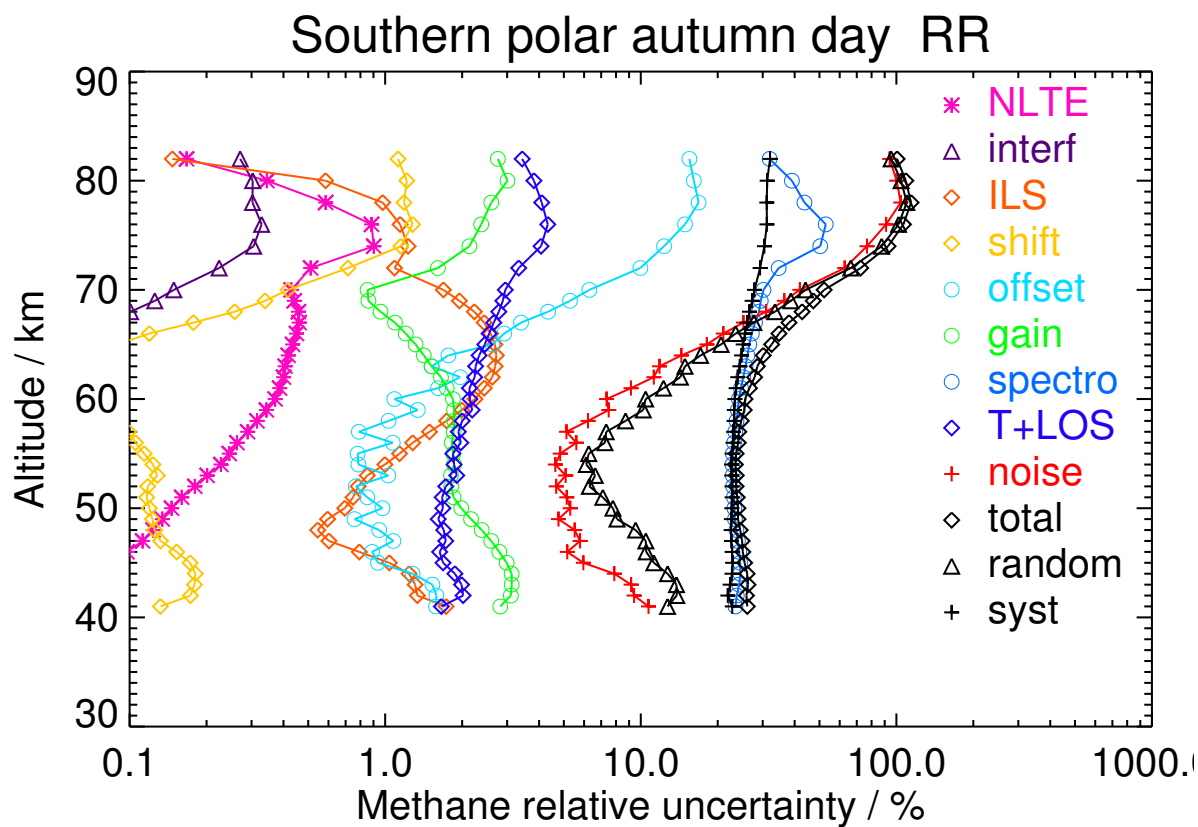

**Figure S135.** V8R\_CH4\_662 Southern polar autumn day

**Table S136.** Methane error budget for Southern polar autumn night. All uncertainties are  $1\sigma$ .

| altitude (km) | mean target (ppbv) | NLTE (ppbv) | interf (ppbv) | ILS (ppbv) | shift (ppbv) | offset (ppbv) | gain (ppbv) | spectro (ppbv) | T+LOS (ppbv) | noise (ppbv) | random (ppbv) | syst (ppbv) | total (ppbv) |
|---------------|--------------------|-------------|---------------|------------|--------------|---------------|-------------|----------------|--------------|--------------|---------------|-------------|--------------|
| 45            | 111.77             | 0.09        | 0.03          | 0.90       | 0.20         | 1.02          | 3.22        | 26.35          | 2.12         | 5.52         | 8.53          | 25.86       | 27.23        |
| 50            | 192.83             | 0.24        | 0.03          | 1.80       | 0.22         | 1.88          | 4.28        | 44.79          | 3.37         | 9.70         | 11.42         | 44.79       | 46.23        |
| 55            | 148.98             | 0.32        | 0.02          | 1.96       | 0.13         | 1.17          | 2.97        | 36.18          | 2.77         | 8.53         | 11.14         | 35.77       | 37.47        |
| 60            | 80.84              | 0.29        | 0.02          | 1.99       | 0.06         | 0.85          | 1.74        | 22.18          | 1.74         | 7.62         | 12.44         | 20.15       | 23.68        |
| 65            | 40.75              | 0.20        | 0.04          | 1.10       | 0.06         | 1.48          | 0.47        | 12.01          | 0.96         | 9.69         | 11.56         | 10.45       | 15.58        |
| 70            | 21.14              | 0.10        | 0.05          | 0.34       | 0.11         | 1.84          | 0.29        | 6.26           | 0.62         | 10.43        | 10.96         | 5.66        | 12.33        |
| 74            | 23.01              | 0.16        | 0.09          | 0.13       | 0.27         | 3.91          | 0.85        | 7.66           | 0.88         | 22.11        | 22.88         | 6.40        | 23.76        |
| 80            | 33.71              | 0.29        | 0.17          | 0.46       | 0.56         | 7.58          | 1.91        | 11.53          | 1.35         | 42.07        | 43.39         | 9.14        | 44.34        |

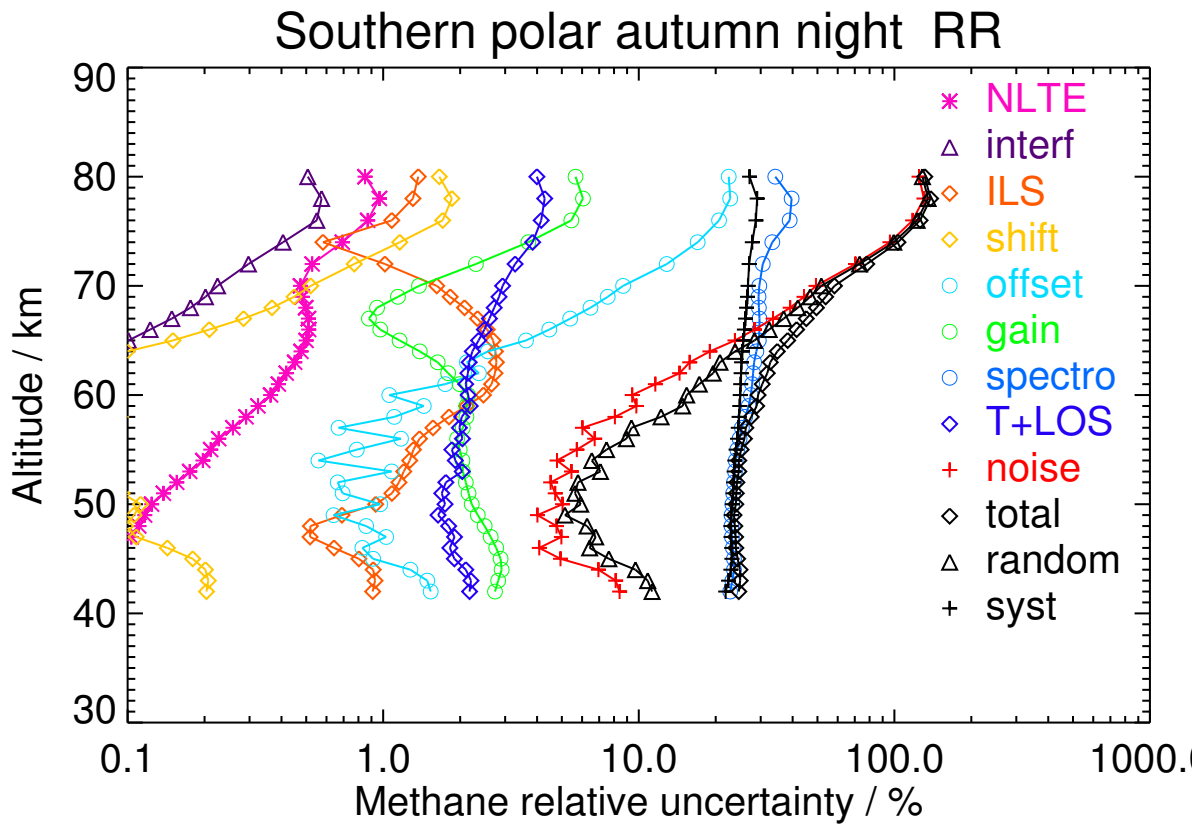

**Figure S136.** V8R\_CH4\_662 Southern polar autumn night

**S6 Nitrous oxide error contribution profile plots and  
tabulated values for FR NOM data (V8H\_N2O\_61)**

**Table S137.** Nitrous oxide error budget for Northern polar winter day. All uncertainties are  $1\sigma$ .

| altitude (km) | mean target (ppbv) | interf (ppbv) | ILS (ppbv) | shift (ppbv) | offset (ppbv) | gain (ppbv) | spectro (ppbv) | T+LOS (ppbv) | noise (ppbv) | random (ppbv) | syst (ppbv) | total (ppbv) |
|---------------|--------------------|---------------|------------|--------------|---------------|-------------|----------------|--------------|--------------|---------------|-------------|--------------|
| 9             | 305.738            | 4.077         | 2.073      | 0.221        | 3.024         | 10.454      | 11.937         | 4.645        | 7.799        | 12.146        | 14.724      | 19.087       |
| 12            | 289.425            | 1.369         | 3.335      | 0.292        | 1.917         | 9.353       | 12.213         | 3.786        | 5.461        | 9.516         | 14.388      | 17.250       |
| 15            | 254.523            | 1.176         | 6.006      | 0.526        | 1.867         | 11.209      | 15.015         | 5.352        | 5.340        | 12.420        | 17.181      | 21.200       |
| 18            | 180.530            | 0.414         | 8.877      | 0.901        | 1.610         | 13.304      | 16.303         | 4.713        | 3.989        | 16.146        | 17.395      | 23.733       |
| 21            | 115.179            | 0.223         | 5.021      | 1.123        | 1.793         | 13.044      | 13.851         | 3.336        | 3.475        | 14.928        | 13.860      | 20.370       |
| 24            | 97.868             | 0.136         | 2.771      | 0.818        | 1.365         | 8.950       | 10.408         | 1.968        | 2.887        | 10.823        | 9.682       | 14.521       |
| 27            | 88.944             | 0.129         | 1.144      | 0.377        | 0.828         | 4.373       | 9.541          | 1.551        | 2.510        | 7.369         | 8.167       | 11.001       |
| 30            | 69.800             | 0.067         | 1.045      | 0.212        | 0.490         | 2.414       | 9.017          | 1.405        | 1.863        | 5.724         | 7.823       | 9.693        |
| 33            | 36.200             | 0.041         | 1.352      | 0.170        | 0.291         | 1.367       | 6.000          | 0.800        | 1.335        | 4.408         | 4.776       | 6.499        |
| 36            | 16.777             | 0.023         | 0.690      | 0.059        | 0.201         | 0.936       | 2.636          | 0.347        | 0.988        | 2.411         | 1.905       | 3.072        |
| 39            | 12.765             | 0.017         | 0.468      | 0.062        | 0.171         | 0.935       | 0.920          | 0.191        | 0.775        | 1.145         | 1.140       | 1.615        |
| 42            | 11.956             | 0.013         | 0.293      | 0.057        | 0.144         | 0.878       | 0.732          | 0.138        | 0.585        | 0.921         | 0.965       | 1.334        |
| 45            | 9.387              | 0.016         | 0.188      | 0.045        | 0.106         | 0.663       | 0.627          | 0.124        | 0.562        | 0.846         | 0.706       | 1.101        |
| 48            | 6.274              | 0.009         | 0.134      | 0.031        | 0.096         | 0.286       | 0.546          | 0.079        | 0.645        | 0.759         | 0.505       | 0.911        |
| 52            | 2.882              | 0.007         | 0.151      | 0.020        | 0.098         | 0.171       | 0.349          | 0.052        | 0.747        | 0.804         | 0.312       | 0.863        |
| 56            | 1.156              | 0.030         | 0.267      | 0.046        | 0.106         | 0.298       | 0.310          | 0.053        | 0.781        | 0.930         | 0.140       | 0.940        |
| 60            | 0.796              | 0.031         | 0.311      | 0.035        | 0.235         | 0.361       | 0.327          | 0.039        | 1.586        | 1.696         | 0.178       | 1.705        |
| 64            | 0.346              | 0.040         | 0.439      | 0.052        | 0.263         | 0.538       | 0.475          | 0.052        | 1.643        | 1.835         | 0.339       | 1.867        |
| 68            | 0.391              | 0.021         | 0.107      | 0.035        | 0.285         | 0.316       | 0.165          | 0.043        | 1.719        | 1.772         | 0.197       | 1.783        |

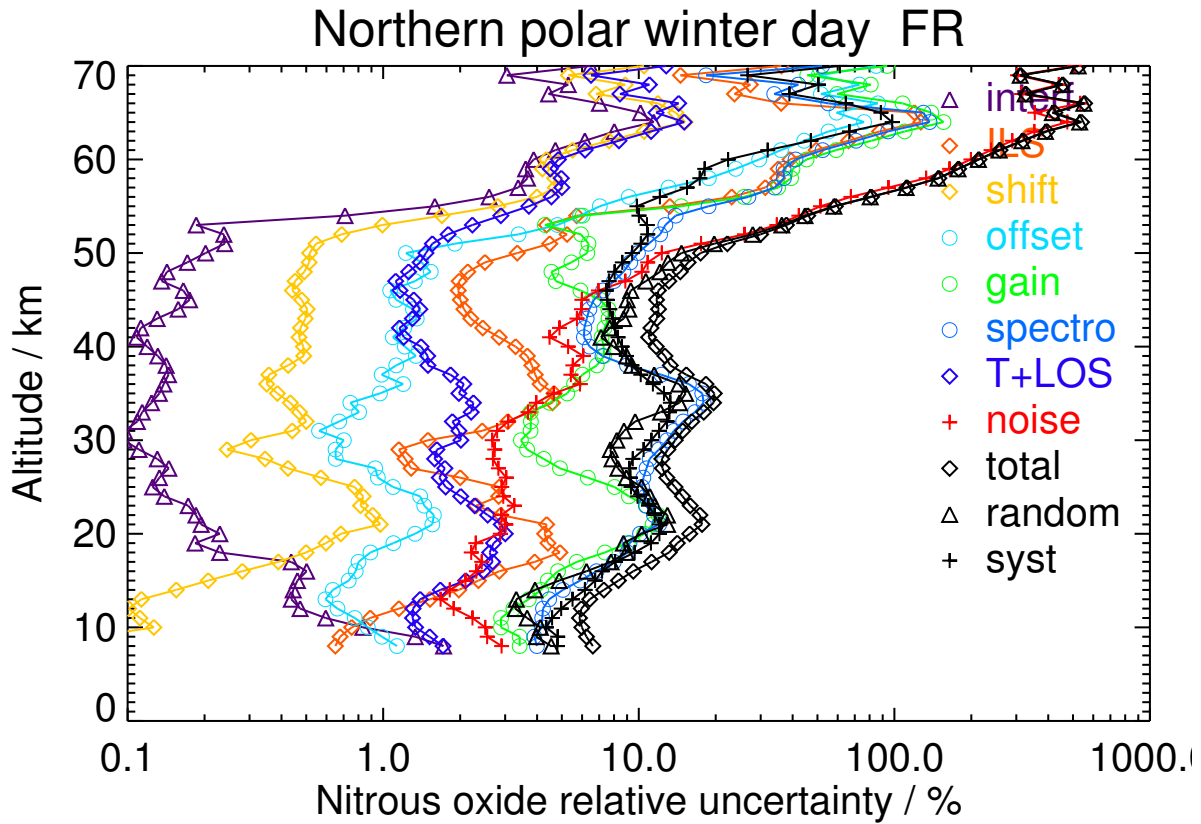

**Figure S137.** V8H\_N2O\_61 Northern polar winter day

**Table S138.** Nitrous oxide error budget for Northern polar winter night. All uncertainties are  $1\sigma$ .

| altitude (km) | mean target (ppbv) | interf (ppbv) | ILS (ppbv) | shift (ppbv) | offset (ppbv) | gain (ppbv) | spectro (ppbv) | T+LOS (ppbv) | noise (ppbv) | random (ppbv) | syst (ppbv) | total (ppbv) |
|---------------|--------------------|---------------|------------|--------------|---------------|-------------|----------------|--------------|--------------|---------------|-------------|--------------|
| 9             | 310.316            | 2.598         | 2.802      | 0.285        | 2.743         | 10.391      | 11.967         | 4.083        | 7.120        | 10.559        | 15.141      | 18.459       |
| 12            | 293.945            | 2.096         | 6.450      | 0.422        | 2.231         | 12.526      | 12.057         | 4.696        | 5.958        | 11.670        | 16.577      | 20.273       |
| 15            | 250.905            | 2.370         | 7.406      | 0.426        | 2.119         | 11.041      | 12.663         | 5.839        | 6.161        | 12.052        | 16.559      | 20.480       |
| 18            | 171.572            | 0.923         | 7.722      | 0.786        | 1.476         | 9.824       | 15.904         | 5.491        | 4.364        | 14.834        | 15.552      | 21.492       |
| 21            | 93.711             | 0.347         | 5.532      | 0.845        | 1.280         | 8.075       | 13.902         | 2.895        | 3.768        | 12.896        | 12.158      | 17.723       |
| 24            | 80.538             | 0.125         | 4.427      | 0.776        | 0.940         | 4.209       | 10.942         | 1.819        | 3.078        | 11.170        | 6.825       | 13.090       |
| 27            | 73.593             | 0.141         | 1.676      | 0.390        | 0.649         | 2.408       | 10.201         | 1.346        | 2.381        | 8.338         | 7.156       | 10.988       |
| 30            | 48.460             | 0.082         | 0.775      | 0.123        | 0.374         | 1.529       | 7.465          | 1.034        | 1.490        | 5.667         | 5.477       | 7.882        |
| 33            | 23.951             | 0.039         | 1.116      | 0.101        | 0.236         | 1.267       | 3.824          | 0.508        | 0.933        | 3.149         | 2.960       | 4.321        |
| 36            | 10.386             | 0.023         | 0.459      | 0.023        | 0.118         | 0.608       | 1.454          | 0.195        | 0.628        | 1.320         | 1.183       | 1.772        |
| 39            | 6.813              | 0.014         | 0.216      | 0.026        | 0.089         | 0.393       | 0.442          | 0.089        | 0.482        | 0.629         | 0.500       | 0.803        |
| 42            | 7.116              | 0.012         | 0.144      | 0.022        | 0.067         | 0.354       | 0.428          | 0.066        | 0.359        | 0.545         | 0.413       | 0.684        |
| 45            | 6.653              | 0.018         | 0.150      | 0.026        | 0.070         | 0.410       | 0.396          | 0.083        | 0.399        | 0.625         | 0.359       | 0.721        |
| 48            | 5.395              | 0.010         | 0.126      | 0.026        | 0.083         | 0.320       | 0.423          | 0.057        | 0.512        | 0.670         | 0.348       | 0.755        |
| 52            | 2.848              | 0.014         | 0.206      | 0.027        | 0.092         | 0.255       | 0.390          | 0.060        | 0.658        | 0.759         | 0.360       | 0.840        |
| 56            | 0.639              | 0.043         | 0.239      | 0.055        | 0.129         | 0.480       | 0.325          | 0.088        | 0.762        | 0.939         | 0.347       | 1.001        |
| 60            | 0.058              | 0.059         | 0.396      | 0.076        | 0.277         | 0.739       | 0.467          | 0.119        | 1.733        | 1.915         | 0.597       | 2.006        |
| 64            | -0.455             | 0.070         | 0.511      | 0.071        | 0.286         | 0.965       | 0.616          | 0.105        | 1.697        | 2.000         | 0.744       | 2.134        |
| 68            | 0.343              | 0.033         | 0.116      | 0.047        | 0.250         | 0.239       | 0.167          | 0.053        | 1.578        | 1.620         | 0.185       | 1.630        |

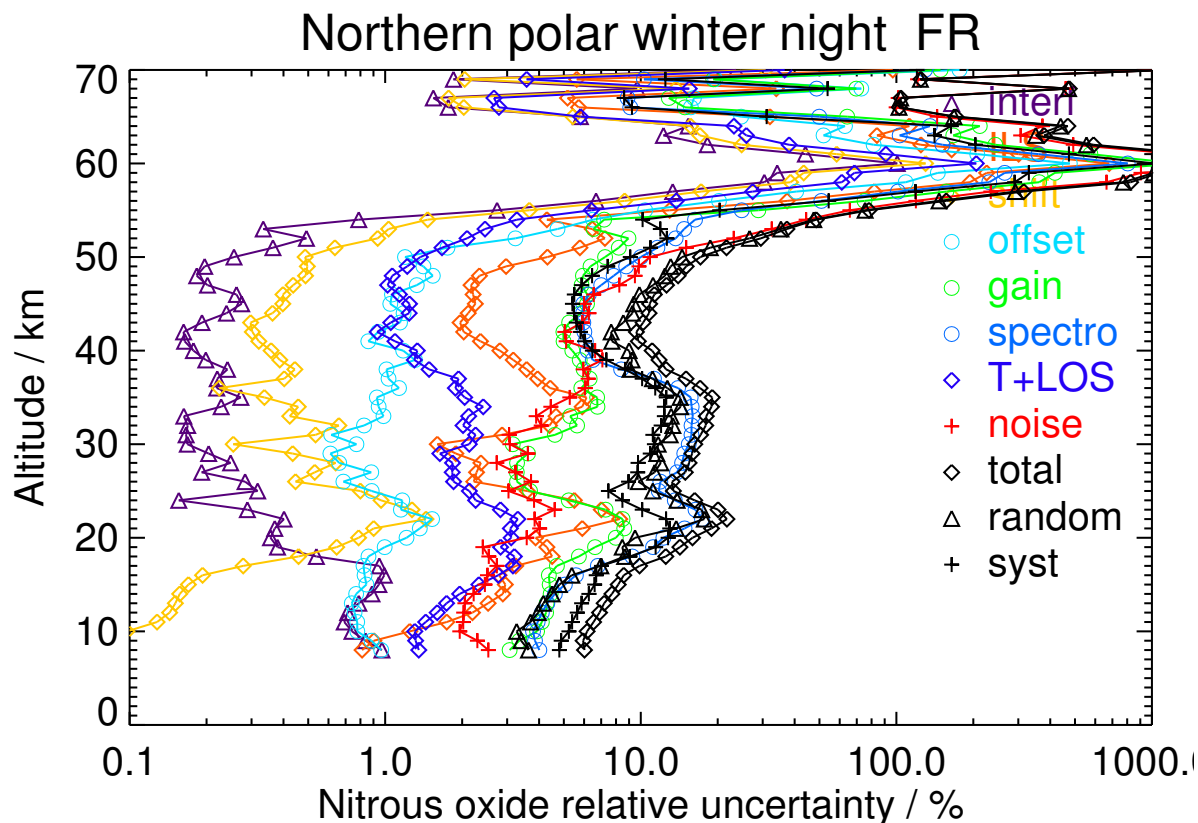

**Figure S138.** V8H\_N2O\_61 Northern polar winter night

**Table S139.** Nitrous oxide error budget for Northern polar spring day. All uncertainties are  $1\sigma$ .

| altitude (km) | mean target (ppbv) | interf (ppbv) | ILS (ppbv) | shift (ppbv) | offset (ppbv) | gain (ppbv) | spectro (ppbv) | T+LOS (ppbv) | noise (ppbv) | random (ppbv) | syst (ppbv) | total (ppbv) |
|---------------|--------------------|---------------|------------|--------------|---------------|-------------|----------------|--------------|--------------|---------------|-------------|--------------|
| 9             | 274.843            | 1.807         | 0.964      | 0.508        | 2.395         | 4.478       | 12.053         | 3.256        | 7.639        | 9.673         | 12.284      | 15.635       |
| 12            | 276.864            | 0.737         | 2.980      | 0.199        | 1.550         | 11.127      | 12.544         | 3.522        | 4.205        | 7.656         | 16.263      | 17.975       |
| 15            | 200.878            | 0.615         | 4.107      | 0.287        | 1.409         | 7.463       | 16.210         | 5.187        | 4.641        | 10.837        | 16.395      | 19.653       |
| 18            | 130.363            | 0.130         | 7.009      | 0.547        | 1.155         | 9.513       | 11.777         | 3.879        | 3.133        | 12.675        | 12.008      | 17.460       |
| 21            | 103.014            | 0.170         | 6.099      | 1.046        | 1.349         | 10.116      | 11.668         | 2.954        | 3.090        | 13.524        | 10.677      | 17.230       |
| 24            | 102.582            | 0.121         | 4.378      | 0.953        | 0.815         | 5.550       | 10.938         | 1.931        | 2.915        | 9.895         | 9.247       | 13.543       |
| 27            | 85.993             | 0.081         | 1.276      | 0.412        | 0.456         | 2.370       | 9.684          | 1.403        | 2.462        | 6.200         | 8.426       | 10.461       |
| 30            | 59.829             | 0.052         | 0.974      | 0.202        | 0.274         | 1.244       | 6.404          | 1.076        | 1.729        | 3.967         | 5.660       | 6.912        |
| 33            | 47.009             | 0.039         | 0.900      | 0.300        | 0.277         | 1.803       | 4.051          | 0.696        | 1.186        | 2.832         | 3.809       | 4.746        |
| 36            | 31.828             | 0.036         | 1.228      | 0.208        | 0.241         | 1.963       | 3.186          | 0.443        | 0.819        | 1.983         | 3.542       | 4.059        |
| 39            | 16.072             | 0.021         | 0.904      | 0.146        | 0.148         | 1.257       | 1.791          | 0.274        | 0.554        | 1.516         | 1.932       | 2.456        |
| 42            | 8.139              | 0.009         | 0.535      | 0.074        | 0.081         | 0.628       | 0.909          | 0.126        | 0.342        | 0.916         | 0.902       | 1.285        |
| 45            | 4.477              | 0.013         | 0.331      | 0.041        | 0.048         | 0.355       | 0.507          | 0.074        | 0.280        | 0.512         | 0.565       | 0.763        |
| 48            | 2.003              | 0.005         | 0.053      | 0.022        | 0.034         | 0.086       | 0.207          | 0.045        | 0.254        | 0.301         | 0.175       | 0.349        |
| 52            | 0.742              | 0.003         | 0.028      | 0.006        | 0.054         | 0.027       | 0.066          | 0.016        | 0.331        | 0.342         | 0.038       | 0.344        |
| 56            | 0.818              | 0.011         | 0.164      | 0.038        | 0.065         | 0.172       | 0.136          | 0.034        | 0.485        | 0.515         | 0.228       | 0.563        |
| 60            | 0.372              | 0.003         | 0.036      | 0.012        | 0.114         | 0.030       | 0.066          | 0.014        | 0.775        | 0.786         | 0.051       | 0.788        |
| 64            | -0.595             | 0.025         | 0.177      | 0.043        | 0.212         | 0.276       | 0.279          | 0.044        | 1.249        | 1.290         | 0.359       | 1.339        |
| 68            | -0.568             | 0.028         | 0.214      | 0.052        | 0.308         | 0.297       | 0.323          | 0.046        | 1.738        | 1.788         | 0.406       | 1.833        |

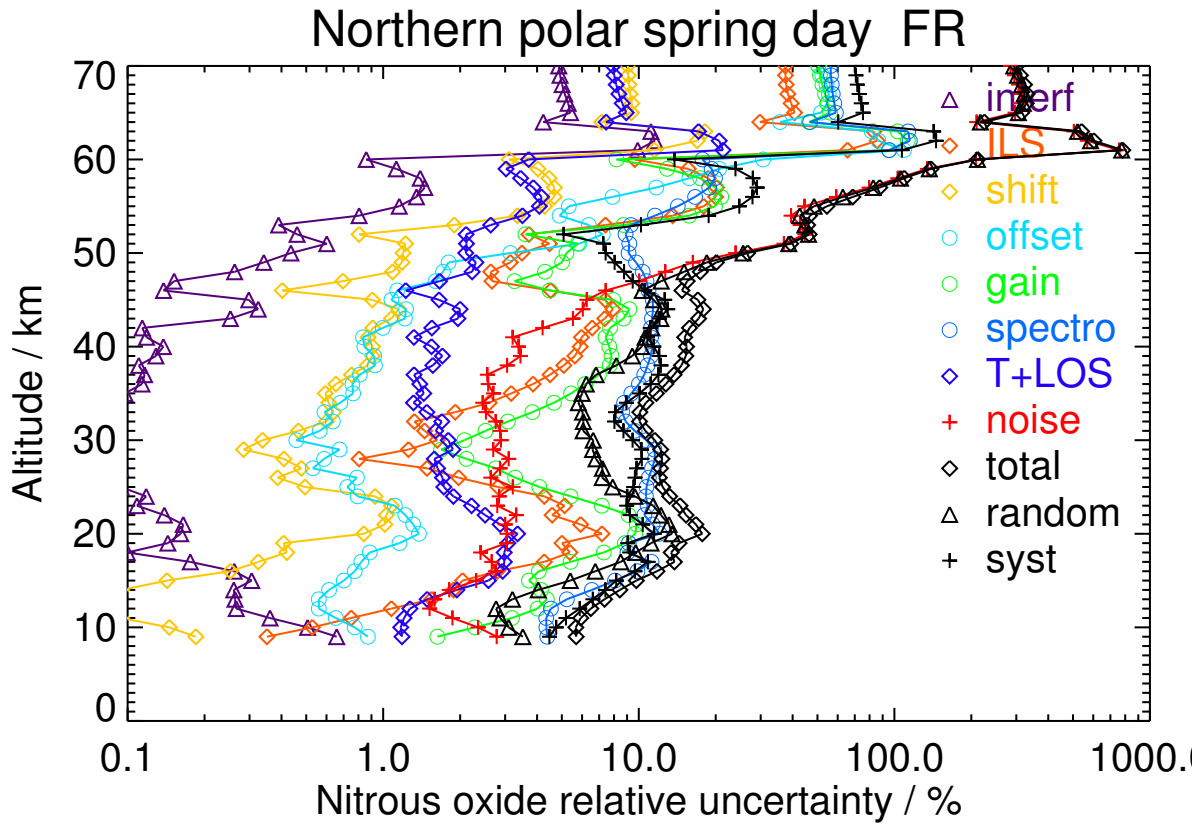

**Figure S139.** V8H\_N2O\_61 Northern polar spring day

**Table S140.** Nitrous oxide error budget for Northern polar spring night. All uncertainties are  $1\sigma$ .

| altitude (km) | mean target (ppbv) | interf (ppbv) | ILS (ppbv) | shift (ppbv) | offset (ppbv) | gain (ppbv) | spectro (ppbv) | T+LOS (ppbv) | noise (ppbv) | random (ppbv) | syst (ppbv) | total (ppbv) |
|---------------|--------------------|---------------|------------|--------------|---------------|-------------|----------------|--------------|--------------|---------------|-------------|--------------|
| 9             | 277.346            | 2.109         | 1.342      | 0.410        | 2.448         | 5.831       | 13.001         | 3.524        | 7.763        | 10.729        | 13.154      | 16.974       |
| 12            | 274.631            | 0.835         | 2.858      | 0.206        | 1.619         | 10.583      | 12.341         | 3.623        | 4.665        | 8.433         | 15.478      | 17.627       |
| 15            | 219.047            | 0.676         | 4.712      | 0.331        | 1.642         | 9.604       | 15.930         | 5.424        | 5.271        | 12.842        | 16.241      | 20.705       |
| 18            | 149.624            | 0.170         | 5.366      | 0.431        | 1.437         | 10.113      | 14.794         | 3.851        | 3.573        | 12.976        | 14.541      | 19.489       |
| 21            | 109.399            | 0.155         | 6.101      | 1.439        | 1.162         | 7.879       | 14.137         | 2.544        | 2.919        | 13.496        | 11.639      | 17.821       |
| 24            | 112.750            | 0.102         | 3.553      | 0.764        | 0.923         | 6.285       | 10.823         | 1.887        | 2.739        | 9.589         | 9.478       | 13.482       |
| 27            | 92.163             | 0.076         | 1.443      | 0.385        | 0.547         | 2.318       | 11.137         | 1.515        | 2.369        | 6.978         | 9.548       | 11.826       |
| 30            | 64.177             | 0.052         | 0.755      | 0.220        | 0.289         | 1.034       | 7.008          | 1.229        | 1.701        | 4.023         | 6.254       | 7.436        |
| 33            | 44.138             | 0.041         | 0.848      | 0.309        | 0.264         | 1.720       | 4.330          | 0.775        | 1.197        | 2.760         | 4.124       | 4.962        |
| 36            | 24.991             | 0.033         | 1.090      | 0.204        | 0.238         | 1.822       | 2.787          | 0.423        | 0.794        | 2.182         | 2.902       | 3.631        |
| 39            | 13.128             | 0.017         | 0.762      | 0.128        | 0.138         | 1.080       | 1.515          | 0.226        | 0.518        | 1.421         | 1.541       | 2.096        |
| 42            | 6.029              | 0.007         | 0.325      | 0.050        | 0.056         | 0.369       | 0.714          | 0.098        | 0.296        | 0.679         | 0.627       | 0.924        |
| 45            | 3.012              | 0.012         | 0.214      | 0.028        | 0.035         | 0.196       | 0.355          | 0.060        | 0.266        | 0.397         | 0.359       | 0.535        |
| 48            | 1.590              | 0.005         | 0.057      | 0.018        | 0.035         | 0.077       | 0.153          | 0.035        | 0.249        | 0.288         | 0.119       | 0.312        |
| 52            | 0.763              | 0.004         | 0.032      | 0.008        | 0.055         | 0.031       | 0.069          | 0.015        | 0.343        | 0.355         | 0.038       | 0.357        |
| 56            | 0.834              | 0.011         | 0.157      | 0.042        | 0.068         | 0.170       | 0.132          | 0.041        | 0.496        | 0.535         | 0.197       | 0.570        |
| 60            | 0.420              | 0.003         | 0.031      | 0.010        | 0.125         | 0.033       | 0.076          | 0.016        | 0.859        | 0.871         | 0.055       | 0.873        |
| 64            | -0.481             | 0.025         | 0.155      | 0.047        | 0.208         | 0.271       | 0.244          | 0.049        | 1.226        | 1.266         | 0.325       | 1.307        |
| 68            | -0.465             | 0.026         | 0.170      | 0.053        | 0.306         | 0.277       | 0.261          | 0.046        | 1.712        | 1.761         | 0.319       | 1.790        |

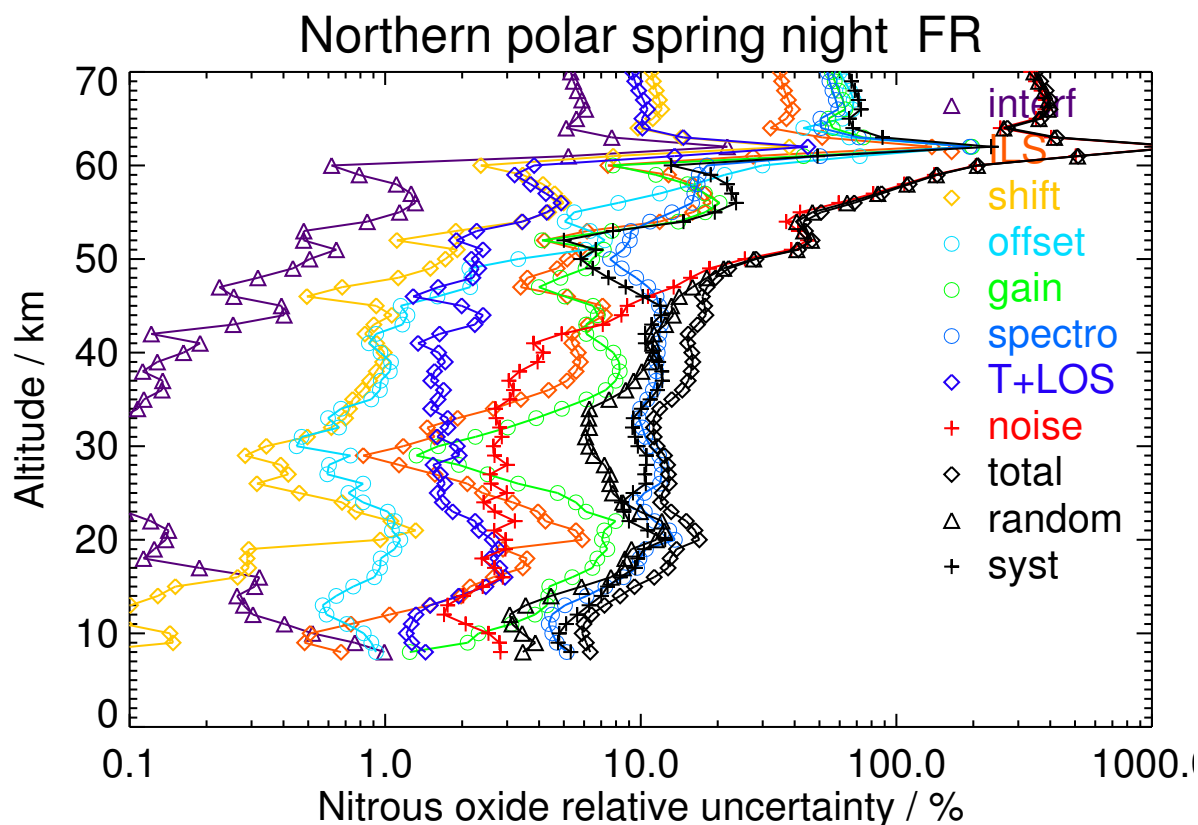

**Figure S140.** V8H\_N2O\_61 Northern polar spring night



**Table S141.** Nitrous oxide error budget for Northern polar summer day. All uncertainties are  $1\sigma$ .

| altitude (km) | mean target (ppbv) | interf (ppbv) | ILS (ppbv) | shift (ppbv) | offset (ppbv) | gain (ppbv) | spectro (ppbv) | T+LOS (ppbv) | noise (ppbv) | random (ppbv) | syst (ppbv) | total (ppbv) |
|---------------|--------------------|---------------|------------|--------------|---------------|-------------|----------------|--------------|--------------|---------------|-------------|--------------|
| 9             | 298.878            | 1.217         | 0.369      | 0.407        | 1.817         | 10.590      | 16.335         | 3.085        | 5.539        | 7.039         | 19.358      | 20.598       |
| 12            | 308.776            | 0.866         | 4.270      | 0.418        | 1.817         | 12.270      | 14.131         | 3.672        | 5.284        | 9.950         | 17.751      | 20.349       |
| 15            | 308.530            | 0.652         | 10.772     | 0.530        | 2.035         | 19.938      | 14.548         | 5.455        | 5.003        | 11.282        | 25.643      | 28.015       |
| 18            | 254.724            | 0.214         | 8.993      | 0.591        | 1.950         | 18.965      | 17.895         | 4.905        | 4.124        | 14.908        | 24.162      | 28.391       |
| 21            | 192.614            | 0.158         | 7.630      | 1.458        | 2.092         | 18.191      | 18.987         | 4.463        | 3.479        | 16.868        | 22.442      | 28.075       |
| 24            | 151.084            | 0.106         | 3.528      | 0.651        | 1.194         | 8.550       | 15.144         | 2.836        | 3.080        | 9.773         | 15.452      | 18.284       |
| 27            | 107.571            | 0.076         | 2.012      | 0.794        | 0.706         | 2.073       | 11.859         | 2.023        | 2.519        | 4.071         | 11.999      | 12.671       |
| 30            | 71.853             | 0.062         | 0.608      | 0.123        | 0.378         | 0.974       | 7.395          | 1.421        | 1.750        | 2.696         | 7.347       | 7.826        |
| 33            | 41.702             | 0.034         | 0.878      | 0.317        | 0.236         | 1.575       | 4.244          | 0.784        | 1.136        | 1.781         | 4.489       | 4.829        |
| 36            | 20.469             | 0.039         | 0.833      | 0.137        | 0.130         | 0.931       | 2.138          | 0.350        | 0.693        | 1.102         | 2.357       | 2.602        |
| 39            | 9.567              | 0.012         | 0.583      | 0.073        | 0.060         | 0.430       | 0.985          | 0.165        | 0.373        | 0.705         | 1.084       | 1.293        |
| 42            | 4.416              | 0.010         | 0.260      | 0.026        | 0.032         | 0.152       | 0.476          | 0.063        | 0.222        | 0.472         | 0.386       | 0.610        |
| 45            | 2.328              | 0.019         | 0.249      | 0.028        | 0.035         | 0.132       | 0.268          | 0.065        | 0.284        | 0.370         | 0.318       | 0.488        |
| 48            | 0.448              | 0.007         | 0.030      | 0.020        | 0.030         | 0.021       | 0.085          | 0.024        | 0.202        | 0.216         | 0.069       | 0.226        |
| 52            | 0.221              | 0.004         | 0.033      | 0.009        | 0.042         | 0.017       | 0.028          | 0.012        | 0.266        | 0.272         | 0.029       | 0.273        |
| 56            | 0.322              | 0.007         | 0.099      | 0.027        | 0.035         | 0.043       | 0.059          | 0.024        | 0.306        | 0.317         | 0.105       | 0.333        |
| 60            | 0.192              | 0.007         | 0.086      | 0.026        | 0.112         | 0.032       | 0.081          | 0.018        | 0.727        | 0.738         | 0.114       | 0.746        |
| 64            | -0.773             | 0.023         | 0.130      | 0.042        | 0.145         | 0.114       | 0.153          | 0.031        | 0.908        | 0.925         | 0.215       | 0.950        |
| 68            | -1.281             | 0.033         | 0.180      | 0.064        | 0.270         | 0.174       | 0.247          | 0.043        | 1.554        | 1.583         | 0.337       | 1.618        |

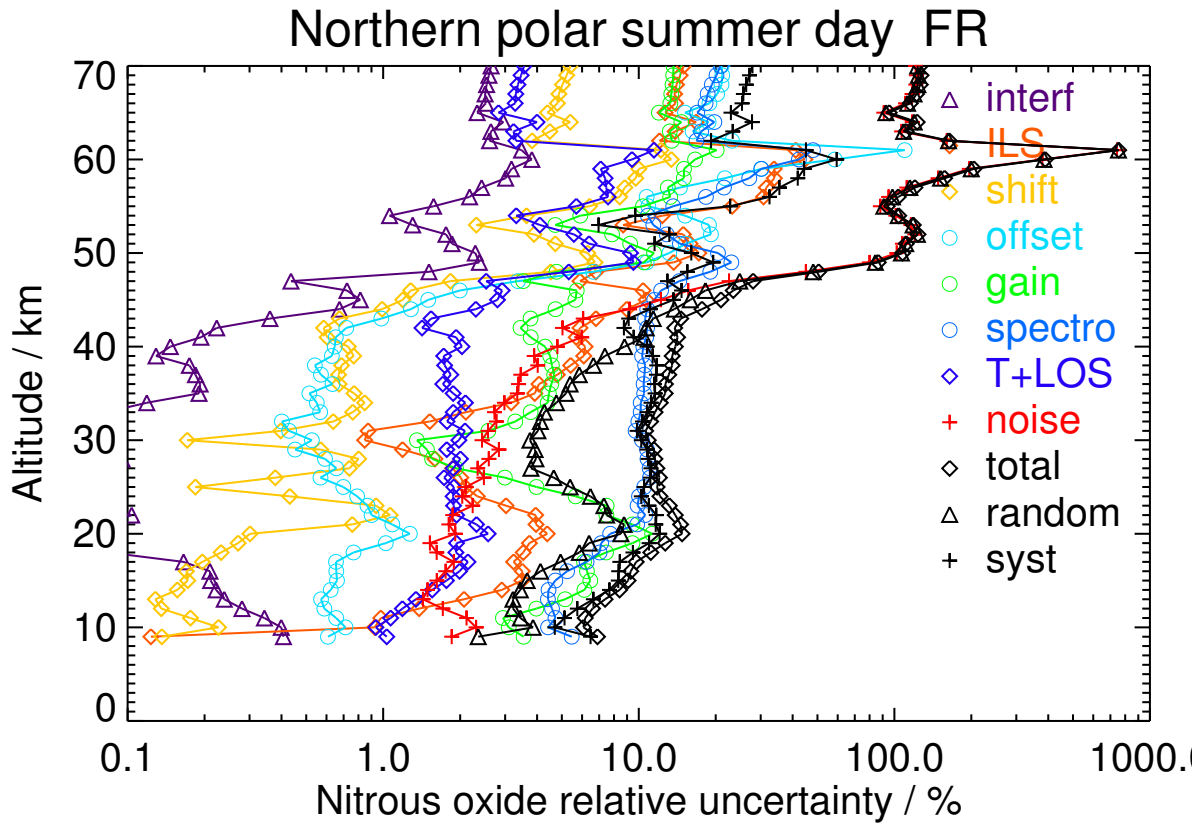

**Figure S141.** V8H\_N2O\_61 Northern polar summer day

**Table S142.** Nitrous oxide error budget for Northern polar summer night. All uncertainties are  $1\sigma$ .

| altitude (km) | mean target (ppbv) | interf (ppbv) | ILS (ppbv) | shift (ppbv) | offset (ppbv) | gain (ppbv) | spectro (ppbv) | T+LOS (ppbv) | noise (ppbv) | random (ppbv) | syst (ppbv) | total (ppbv) |
|---------------|--------------------|---------------|------------|--------------|---------------|-------------|----------------|--------------|--------------|---------------|-------------|--------------|
| 12            | 307.190            | 0.910         | 4.031      | 0.385        | 1.922         | 10.245      | 13.246         | 3.576        | 5.778        | 9.415         | 16.090      | 18.642       |
| 15            | 309.057            | 0.621         | 9.134      | 0.331        | 1.800         | 16.638      | 13.542         | 4.571        | 4.526        | 10.732        | 21.761      | 24.264       |
| 18            | 260.482            | 0.230         | 9.411      | 0.314        | 2.099         | 18.911      | 17.396         | 5.113        | 4.212        | 15.286        | 23.741      | 28.236       |
| 21            | 194.991            | 0.161         | 5.467      | 1.122        | 2.045         | 16.479      | 17.834         | 4.373        | 3.765        | 14.362        | 21.260      | 25.656       |
| 24            | 148.127            | 0.108         | 4.081      | 0.658        | 1.010         | 5.791       | 16.017         | 2.759        | 3.155        | 7.784         | 16.284      | 18.049       |
| 27            | 105.698            | 0.069         | 1.799      | 0.624        | 0.727         | 1.952       | 12.212         | 2.051        | 2.572        | 3.957         | 12.340      | 12.959       |
| 30            | 62.464             | 0.057         | 0.767      | 0.157        | 0.391         | 0.765       | 7.676          | 1.397        | 1.691        | 2.432         | 7.693       | 8.068        |
| 33            | 30.010             | 0.019         | 0.745      | 0.218        | 0.197         | 1.053       | 3.312          | 0.639        | 1.002        | 1.452         | 3.467       | 3.759        |
| 36            | 15.176             | 0.029         | 0.707      | 0.120        | 0.116         | 0.753       | 1.644          | 0.258        | 0.607        | 1.019         | 1.787       | 2.058        |
| 39            | 6.623              | 0.005         | 0.390      | 0.038        | 0.047         | 0.260       | 0.838          | 0.132        | 0.323        | 0.525         | 0.879       | 1.023        |
| 42            | 1.865              | 0.011         | 0.075      | 0.021        | 0.035         | 0.054       | 0.244          | 0.055        | 0.217        | 0.287         | 0.194       | 0.347        |
| 45            | 1.002              | 0.013         | 0.145      | 0.027        | 0.034         | 0.095       | 0.100          | 0.059        | 0.265        | 0.290         | 0.177       | 0.340        |
| 48            | 0.326              | 0.005         | 0.020      | 0.009        | 0.031         | 0.017       | 0.049          | 0.015        | 0.203        | 0.210         | 0.041       | 0.214        |
| 52            | 0.040              | 0.004         | 0.035      | 0.009        | 0.048         | 0.020       | 0.032          | 0.015        | 0.312        | 0.318         | 0.031       | 0.320        |
| 56            | 0.318              | 0.006         | 0.086      | 0.023        | 0.034         | 0.049       | 0.051          | 0.029        | 0.311        | 0.321         | 0.093       | 0.334        |
| 60            | 0.584              | 0.006         | 0.102      | 0.023        | 0.131         | 0.035       | 0.089          | 0.024        | 0.867        | 0.880         | 0.125       | 0.889        |
| 64            | -0.518             | 0.025         | 0.149      | 0.040        | 0.154         | 0.119       | 0.157          | 0.041        | 0.986        | 1.004         | 0.230       | 1.030        |
| 68            | -1.035             | 0.035         | 0.230      | 0.063        | 0.246         | 0.164       | 0.247          | 0.057        | 1.434        | 1.463         | 0.356       | 1.506        |

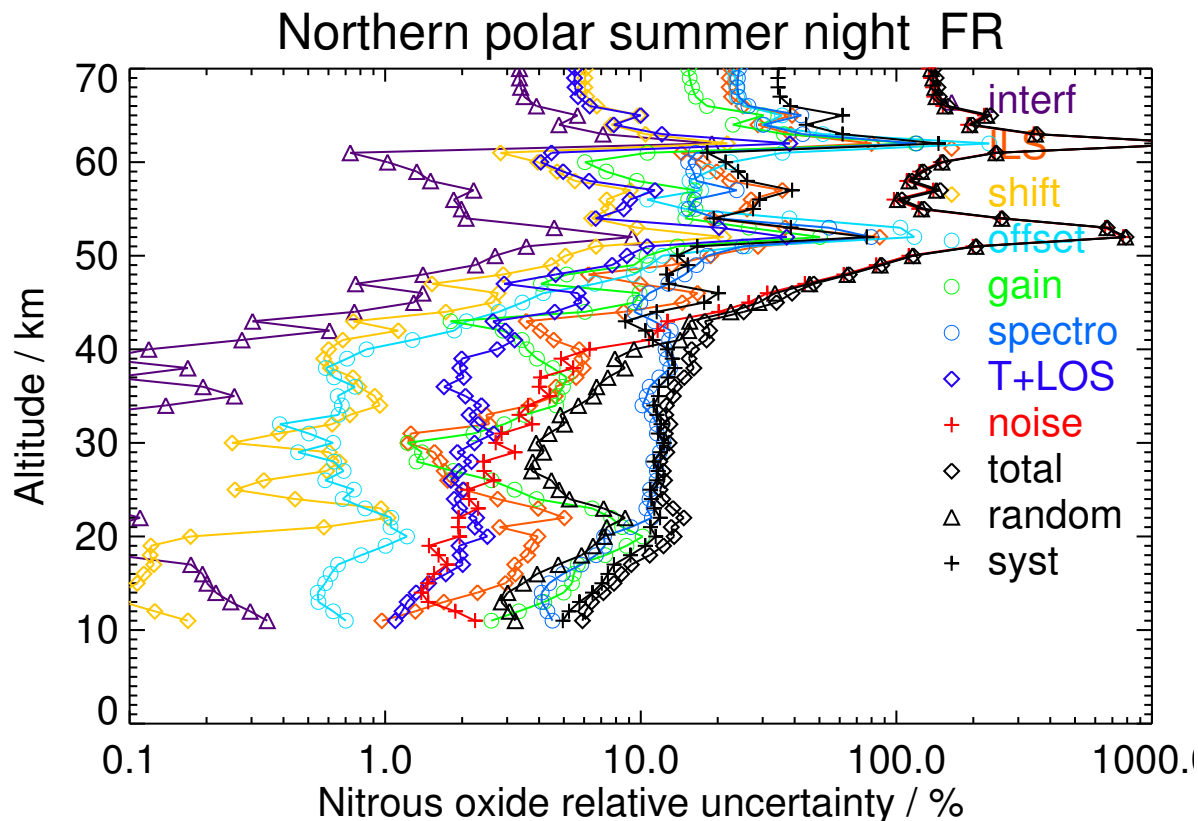

**Figure S142.** V8H\_N2O\_61 Northern polar summer night

**Table S143.** Nitrous oxide error budget for Northern polar autumn day. All uncertainties are  $1\sigma$ .

| altitude (km) | mean target (ppbv) | interf (ppbv) | ILS (ppbv) | shift (ppbv) | offset (ppbv) | gain (ppbv) | spectro (ppbv) | T+LOS (ppbv) | noise (ppbv) | random (ppbv) | syst (ppbv) | total (ppbv) |
|---------------|--------------------|---------------|------------|--------------|---------------|-------------|----------------|--------------|--------------|---------------|-------------|--------------|
| 9             | 300.091            | 2.677         | 1.419      | 0.495        | 2.587         | 6.572       | 12.427         | 2.908        | 7.840        | 10.733        | 12.979      | 16.842       |
| 12            | 309.373            | 1.516         | 4.099      | 0.440        | 1.893         | 12.195      | 13.514         | 3.703        | 5.202        | 9.640         | 17.380      | 19.874       |
| 15            | 297.117            | 1.416         | 7.237      | 0.631        | 1.916         | 16.119      | 14.756         | 5.866        | 5.556        | 11.246        | 21.791      | 24.521       |
| 18            | 265.093            | 0.617         | 18.663     | 1.300        | 2.122         | 22.559      | 13.612         | 8.864        | 5.260        | 17.400        | 29.198      | 33.990       |
| 21            | 200.175            | 0.470         | 8.633      | 0.752        | 2.286         | 17.765      | 13.103         | 5.813        | 4.609        | 11.445        | 22.178      | 24.957       |
| 24            | 139.496            | 0.179         | 3.183      | 1.251        | 1.366         | 9.673       | 15.047         | 2.883        | 3.815        | 7.576         | 17.293      | 18.880       |
| 27            | 86.367             | 0.108         | 1.455      | 0.756        | 0.708         | 4.954       | 10.985         | 1.796        | 3.123        | 5.399         | 11.500      | 12.704       |
| 30            | 41.234             | 0.039         | 1.436      | 0.202        | 0.312         | 1.738       | 7.076          | 1.166        | 2.039        | 3.821         | 6.797       | 7.798        |
| 33            | 13.305             | 0.039         | 0.674      | 0.123        | 0.187         | 0.768       | 2.588          | 0.547        | 1.172        | 2.124         | 2.225       | 3.077        |
| 36            | 4.927              | 0.016         | 0.308      | 0.047        | 0.099         | 0.434       | 0.848          | 0.182        | 0.610        | 0.972         | 0.689       | 1.191        |
| 39            | 1.918              | 0.007         | 0.254      | 0.031        | 0.048         | 0.276       | 0.549          | 0.068        | 0.369        | 0.716         | 0.271       | 0.766        |
| 42            | 0.552              | 0.004         | 0.109      | 0.021        | 0.034         | 0.129       | 0.273          | 0.046        | 0.318        | 0.444         | 0.102       | 0.456        |
| 45            | 0.551              | 0.003         | 0.052      | 0.017        | 0.058         | 0.130       | 0.133          | 0.045        | 0.400        | 0.438         | 0.105       | 0.451        |
| 48            | 0.393              | 0.002         | 0.022      | 0.012        | 0.069         | 0.085       | 0.063          | 0.018        | 0.501        | 0.516         | 0.039       | 0.518        |
| 52            | 0.563              | 0.003         | 0.043      | 0.011        | 0.058         | 0.046       | 0.058          | 0.015        | 0.546        | 0.555         | 0.037       | 0.556        |
| 56            | 0.870              | 0.004         | 0.037      | 0.016        | 0.087         | 0.099       | 0.058          | 0.029        | 0.654        | 0.666         | 0.085       | 0.672        |
| 60            | 1.112              | 0.006         | 0.053      | 0.015        | 0.205         | 0.081       | 0.068          | 0.034        | 1.249        | 1.270         | 0.075       | 1.272        |
| 64            | 0.744              | 0.011         | 0.080      | 0.014        | 0.248         | 0.097       | 0.117          | 0.035        | 1.483        | 1.511         | 0.089       | 1.514        |
| 68            | 0.585              | 0.010         | 0.049      | 0.015        | 0.262         | 0.112       | 0.090          | 0.034        | 1.535        | 1.561         | 0.117       | 1.565        |

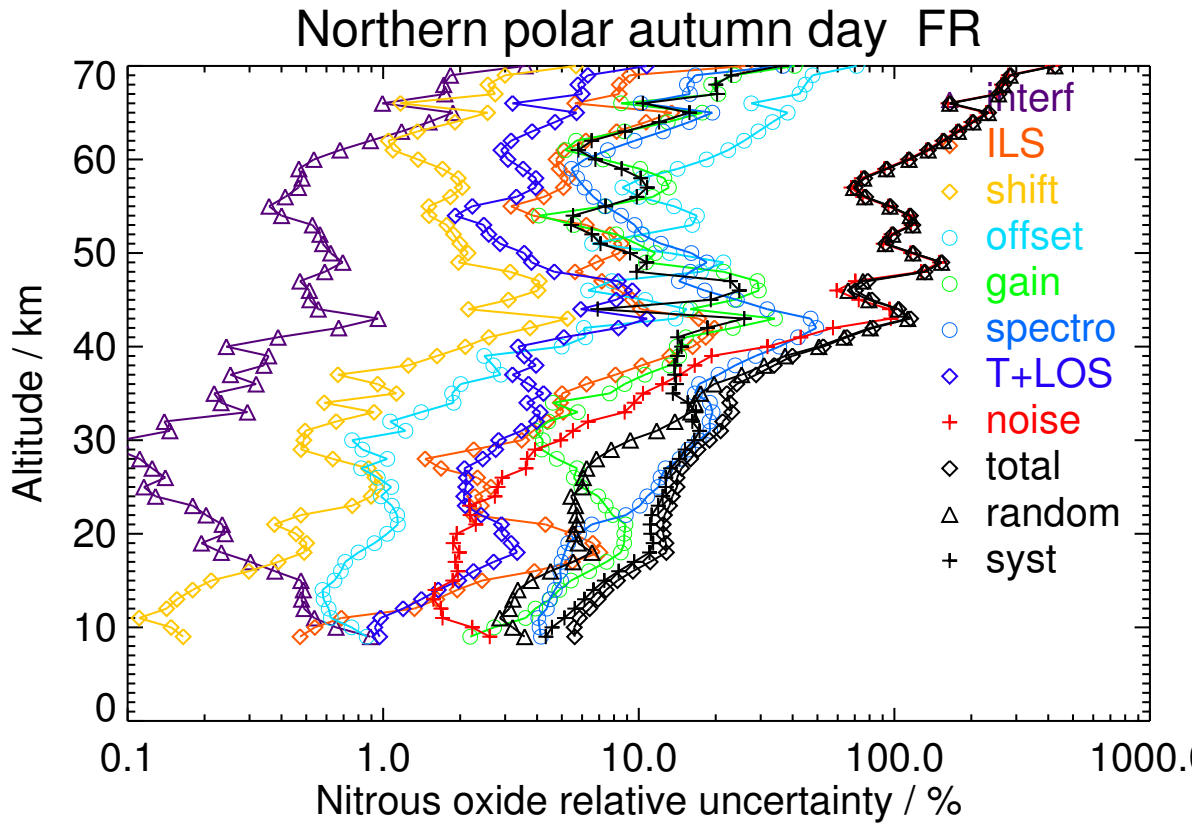

**Figure S143.** V8H\_N2O\_61 Northern polar autumn day

**Table S144.** Nitrous oxide error budget for Northern polar autumn night. All uncertainties are  $1\sigma$ .

| altitude (km) | mean target (ppbv) | interf (ppbv) | ILS (ppbv) | shift (ppbv) | offset (ppbv) | gain (ppbv) | spectro (ppbv) | T+LOS (ppbv) | noise (ppbv) | random (ppbv) | syst (ppbv) | total (ppbv) |
|---------------|--------------------|---------------|------------|--------------|---------------|-------------|----------------|--------------|--------------|---------------|-------------|--------------|
| 9             | 303.017            | 2.101         | 0.846      | 0.510        | 2.569         | 3.830       | 12.362         | 2.786        | 8.071        | 9.579         | 12.674      | 15.887       |
| 12            | 303.267            | 1.703         | 3.172      | 0.430        | 1.779         | 10.812      | 12.856         | 3.525        | 4.846        | 7.849         | 16.517      | 18.287       |
| 15            | 276.965            | 1.538         | 5.960      | 0.585        | 1.748         | 13.738      | 13.869         | 5.820        | 5.509        | 9.933         | 19.696      | 22.059       |
| 18            | 243.935            | 0.683         | 16.283     | 1.127        | 1.869         | 20.537      | 12.056         | 8.827        | 5.329        | 15.707        | 26.403      | 30.721       |
| 21            | 189.299            | 0.562         | 8.123      | 0.742        | 2.103         | 15.715      | 13.704         | 5.466        | 4.375        | 11.711        | 20.442      | 23.559       |
| 24            | 121.909            | 0.212         | 4.017      | 1.347        | 1.110         | 7.551       | 16.021         | 2.658        | 3.701        | 7.073         | 17.426      | 18.807       |
| 27            | 69.968             | 0.120         | 1.440      | 0.652        | 0.554         | 3.775       | 9.671          | 1.582        | 2.930        | 4.589         | 10.031      | 11.031       |
| 30            | 32.197             | 0.039         | 1.276      | 0.184        | 0.258         | 1.632       | 5.615          | 0.930        | 1.853        | 3.642         | 5.193       | 6.342        |
| 33            | 12.120             | 0.035         | 0.648      | 0.115        | 0.171         | 0.785       | 2.439          | 0.467        | 1.094        | 2.075         | 2.035       | 2.906        |
| 36            | 3.815              | 0.016         | 0.301      | 0.060        | 0.106         | 0.486       | 0.776          | 0.161        | 0.591        | 1.019         | 0.530       | 1.149        |
| 39            | 2.113              | 0.008         | 0.242      | 0.035        | 0.051         | 0.300       | 0.485          | 0.063        | 0.359        | 0.671         | 0.264       | 0.721        |
| 42            | 0.858              | 0.004         | 0.108      | 0.023        | 0.034         | 0.153       | 0.270          | 0.043        | 0.314        | 0.445         | 0.108       | 0.458        |
| 45            | 0.885              | 0.003         | 0.052      | 0.020        | 0.059         | 0.139       | 0.129          | 0.041        | 0.393        | 0.431         | 0.114       | 0.446        |
| 48            | 0.921              | 0.003         | 0.039      | 0.014        | 0.068         | 0.085       | 0.079          | 0.023        | 0.503        | 0.517         | 0.074       | 0.523        |
| 52            | 0.895              | 0.004         | 0.031      | 0.015        | 0.058         | 0.081       | 0.059          | 0.024        | 0.540        | 0.552         | 0.043       | 0.554        |
| 56            | 1.140              | 0.004         | 0.063      | 0.022        | 0.093         | 0.137       | 0.073          | 0.039        | 0.674        | 0.688         | 0.138       | 0.702        |
| 60            | 1.002              | 0.007         | 0.087      | 0.027        | 0.202         | 0.142       | 0.086          | 0.050        | 1.210        | 1.235         | 0.138       | 1.243        |
| 64            | 0.771              | 0.013         | 0.077      | 0.015        | 0.254         | 0.117       | 0.102          | 0.038        | 1.484        | 1.513         | 0.094       | 1.516        |
| 68            | 0.985              | 0.009         | 0.066      | 0.012        | 0.257         | 0.111       | 0.088          | 0.035        | 1.492        | 1.518         | 0.109       | 1.522        |

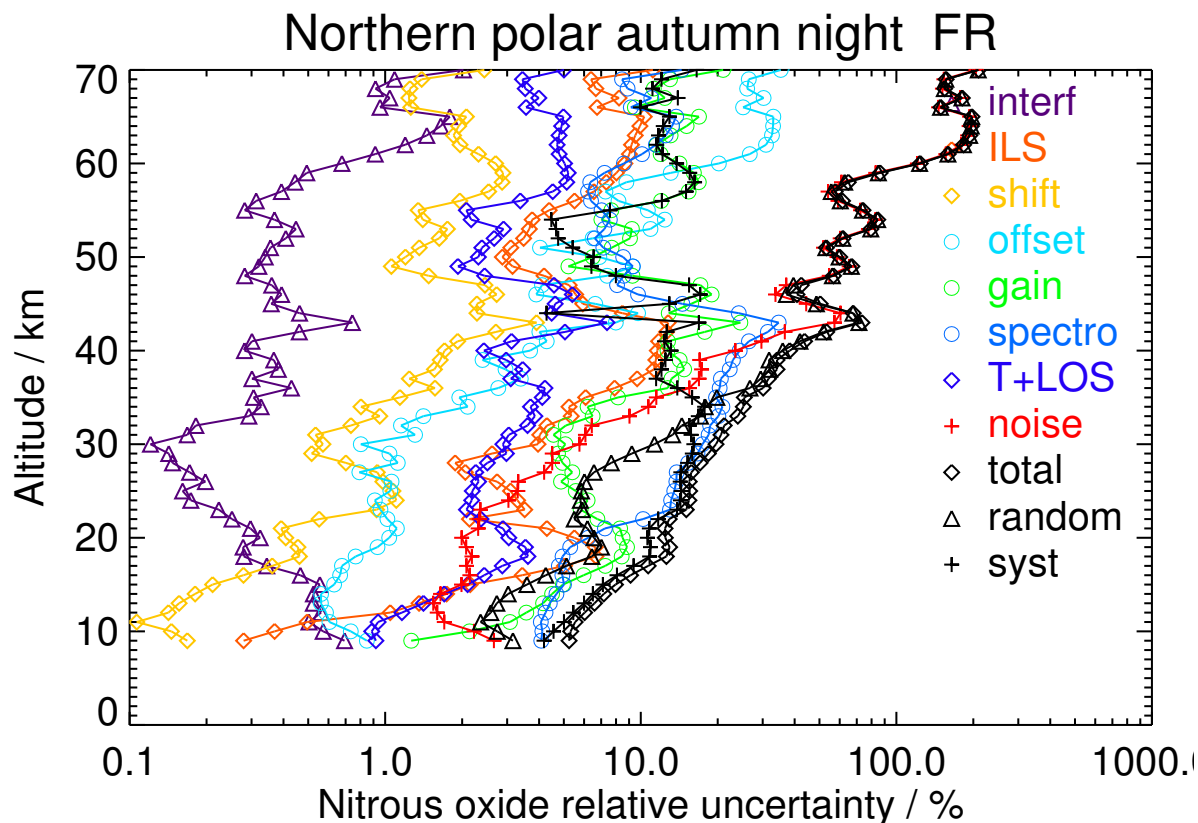

**Figure S144.** V8H\_N2O\_61 Northern polar autumn night

**Table S145.** Nitrous oxide error budget for Northern midlatitude winter day. All uncertainties are  $1\sigma$ .

| altitude (km) | mean target (ppbv) | interf (ppbv) | ILS (ppbv) | shift (ppbv) | offset (ppbv) | gain (ppbv) | spectro (ppbv) | T+LOS (ppbv) | noise (ppbv) | random (ppbv) | syst (ppbv) | total (ppbv) |
|---------------|--------------------|---------------|------------|--------------|---------------|-------------|----------------|--------------|--------------|---------------|-------------|--------------|
| 9             | 301.070            | 4.926         | 1.024      | 0.243        | 2.811         | 3.441       | 13.268         | 4.321        | 8.529        | 11.451        | 13.470      | 17.680       |
| 12            | 290.294            | 0.949         | 2.998      | 0.342        | 1.869         | 7.089       | 13.260         | 3.427        | 5.732        | 9.681         | 13.801      | 16.858       |
| 15            | 270.864            | 0.621         | 7.489      | 0.648        | 1.806         | 10.350      | 15.953         | 4.784        | 5.287        | 13.349        | 17.159      | 21.740       |
| 18            | 232.726            | 0.294         | 9.361      | 0.728        | 1.827         | 13.257      | 18.939         | 4.624        | 4.125        | 17.388        | 19.028      | 25.776       |
| 21            | 185.796            | 0.246         | 6.848      | 1.422        | 2.091         | 14.452      | 18.658         | 3.948        | 3.616        | 15.228        | 20.176      | 25.278       |
| 24            | 155.451            | 0.133         | 4.880      | 1.374        | 1.543         | 9.510       | 16.381         | 2.887        | 3.320        | 10.880        | 16.966      | 20.155       |
| 27            | 119.954            | 0.106         | 1.383      | 0.329        | 0.920         | 3.491       | 12.270         | 2.210        | 2.934        | 6.483         | 11.708      | 13.383       |
| 30            | 90.003             | 0.078         | 0.925      | 0.191        | 0.577         | 1.888       | 11.691         | 1.962        | 2.150        | 6.155         | 10.586      | 12.245       |
| 33            | 39.889             | 0.041         | 1.239      | 0.227        | 0.354         | 1.665       | 6.067          | 1.017        | 1.430        | 4.025         | 5.308       | 6.661        |
| 36            | 20.441             | 0.034         | 0.811      | 0.091        | 0.212         | 1.125       | 2.599          | 0.392        | 0.927        | 1.900         | 2.477       | 3.122        |
| 39            | 9.762              | 0.018         | 0.444      | 0.054        | 0.125         | 0.618       | 0.985          | 0.169        | 0.654        | 1.106         | 0.896       | 1.423        |
| 42            | 10.545             | 0.009         | 0.329      | 0.038        | 0.114         | 0.648       | 0.555          | 0.114        | 0.456        | 0.761         | 0.701       | 1.035        |
| 45            | 10.719             | 0.013         | 0.293      | 0.053        | 0.099         | 0.651       | 0.605          | 0.140        | 0.441        | 0.685         | 0.796       | 1.050        |
| 48            | 7.351              | 0.010         | 0.172      | 0.040        | 0.078         | 0.318       | 0.679          | 0.085        | 0.489        | 0.673         | 0.626       | 0.919        |
| 52            | 2.540              | 0.006         | 0.150      | 0.023        | 0.087         | 0.098       | 0.374          | 0.054        | 0.625        | 0.687         | 0.318       | 0.757        |
| 56            | 0.733              | 0.019         | 0.081      | 0.034        | 0.083         | 0.104       | 0.170          | 0.052        | 0.690        | 0.722         | 0.105       | 0.730        |
| 60            | 0.487              | 0.019         | 0.129      | 0.023        | 0.214         | 0.113       | 0.136          | 0.036        | 1.514        | 1.540         | 0.119       | 1.545        |
| 64            | -0.119             | 0.025         | 0.117      | 0.035        | 0.227         | 0.220       | 0.178          | 0.039        | 1.490        | 1.524         | 0.215       | 1.539        |
| 68            | -0.528             | 0.021         | 0.080      | 0.036        | 0.275         | 0.238       | 0.170          | 0.037        | 1.657        | 1.693         | 0.223       | 1.707        |

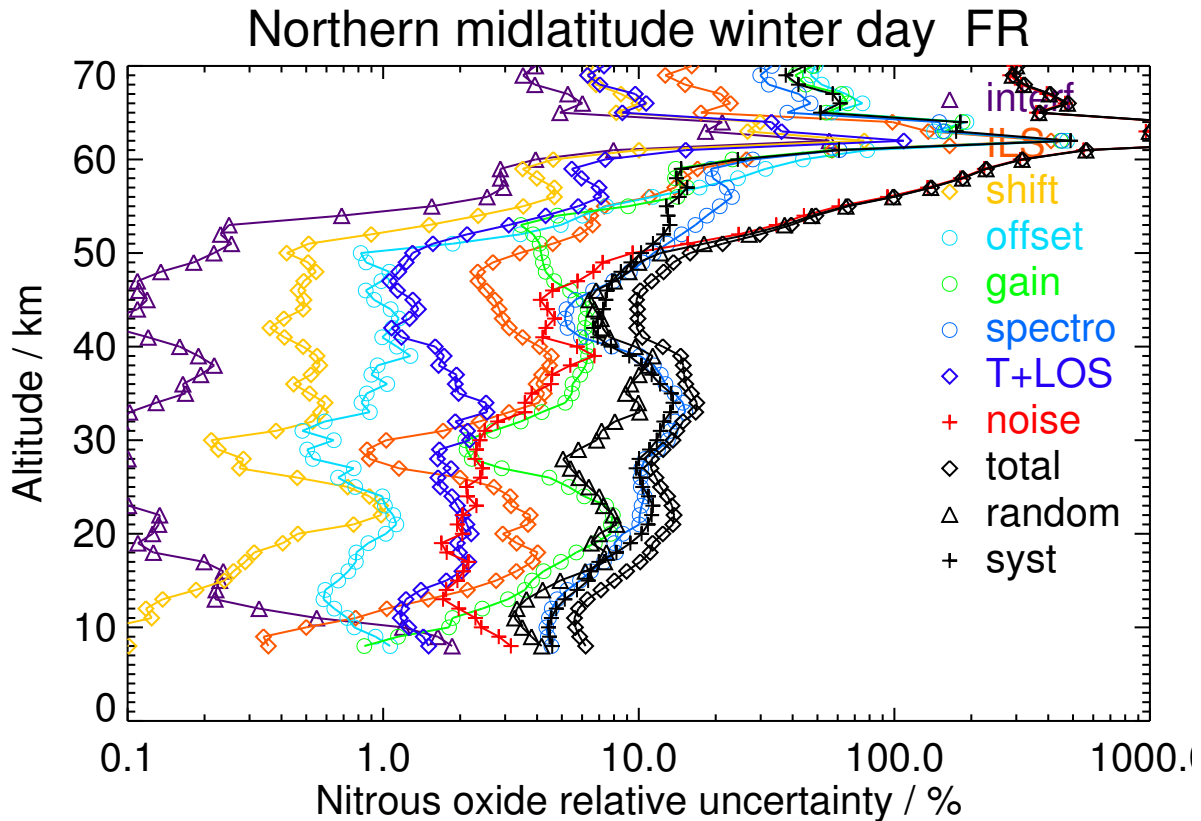

**Figure S145.** V8H\_N2O\_61 Northern midlatitude winter day

**Table S146.** Nitrous oxide error budget for Northern midlatitude winter night. All uncertainties are  $1\sigma$ .

| altitude (km) | mean target (ppbv) | interf (ppbv) | ILS (ppbv) | shift (ppbv) | offset (ppbv) | gain (ppbv) | spectro (ppbv) | T+LOS (ppbv) | noise (ppbv) | random (ppbv) | syst (ppbv) | total (ppbv) |
|---------------|--------------------|---------------|------------|--------------|---------------|-------------|----------------|--------------|--------------|---------------|-------------|--------------|
| 9             | 296.782            | 4.141         | 0.907      | 0.355        | 2.758         | 3.720       | 14.742         | 3.990        | 8.590        | 12.634        | 13.673      | 18.617       |
| 12            | 286.485            | 1.369         | 2.430      | 0.314        | 1.585         | 6.212       | 17.973         | 3.081        | 5.289        | 13.018        | 15.493      | 20.236       |
| 15            | 259.431            | 0.521         | 5.386      | 0.591        | 1.763         | 7.854       | 19.968         | 4.437        | 5.237        | 15.547        | 17.278      | 23.244       |
| 18            | 219.446            | 0.256         | 6.210      | 0.586        | 1.431         | 8.354       | 24.492         | 4.635        | 4.155        | 20.157        | 18.523      | 27.376       |
| 21            | 182.653            | 0.170         | 7.407      | 1.052        | 1.475         | 10.161      | 19.582         | 3.856        | 3.600        | 15.552        | 18.189      | 23.931       |
| 24            | 159.201            | 0.115         | 4.904      | 1.158        | 1.427         | 10.076      | 15.728         | 2.916        | 3.257        | 11.915        | 15.921      | 19.886       |
| 27            | 141.663            | 0.105         | 2.150      | 0.283        | 0.917         | 5.577       | 13.509         | 2.149        | 2.819        | 8.127         | 12.870      | 15.222       |
| 30            | 111.196            | 0.092         | 1.036      | 0.194        | 0.544         | 2.370       | 13.786         | 1.905        | 2.196        | 7.569         | 12.176      | 14.337       |
| 33            | 56.693             | 0.039         | 1.521      | 0.274        | 0.338         | 2.005       | 8.017          | 1.117        | 1.448        | 4.392         | 7.405       | 8.610        |
| 36            | 20.869             | 0.033         | 1.053      | 0.089        | 0.194         | 1.197       | 3.481          | 0.432        | 0.865        | 2.353         | 3.179       | 3.955        |
| 39            | 8.707              | 0.015         | 0.486      | 0.070        | 0.103         | 0.522       | 1.392          | 0.147        | 0.563        | 1.456         | 0.826       | 1.674        |
| 42            | 7.821              | 0.010         | 0.196      | 0.036        | 0.073         | 0.398       | 0.596          | 0.089        | 0.358        | 0.677         | 0.488       | 0.834        |
| 45            | 7.540              | 0.015         | 0.215      | 0.053        | 0.094         | 0.556       | 0.491          | 0.122        | 0.413        | 0.664         | 0.594       | 0.891        |
| 48            | 5.211              | 0.008         | 0.135      | 0.020        | 0.073         | 0.212       | 0.439          | 0.061        | 0.433        | 0.545         | 0.395       | 0.673        |
| 52            | 2.492              | 0.009         | 0.157      | 0.024        | 0.081         | 0.147       | 0.300          | 0.044        | 0.583        | 0.639         | 0.279       | 0.697        |
| 56            | 0.718              | 0.025         | 0.102      | 0.032        | 0.090         | 0.167       | 0.192          | 0.051        | 0.635        | 0.693         | 0.106       | 0.701        |
| 60            | 0.445              | 0.033         | 0.179      | 0.038        | 0.236         | 0.179       | 0.208          | 0.045        | 1.587        | 1.631         | 0.162       | 1.639        |
| 64            | -0.396             | 0.040         | 0.234      | 0.057        | 0.250         | 0.322       | 0.296          | 0.079        | 1.616        | 1.673         | 0.362       | 1.712        |
| 68            | -0.672             | 0.024         | 0.094      | 0.038        | 0.259         | 0.313       | 0.157          | 0.064        | 1.616        | 1.651         | 0.296       | 1.678        |

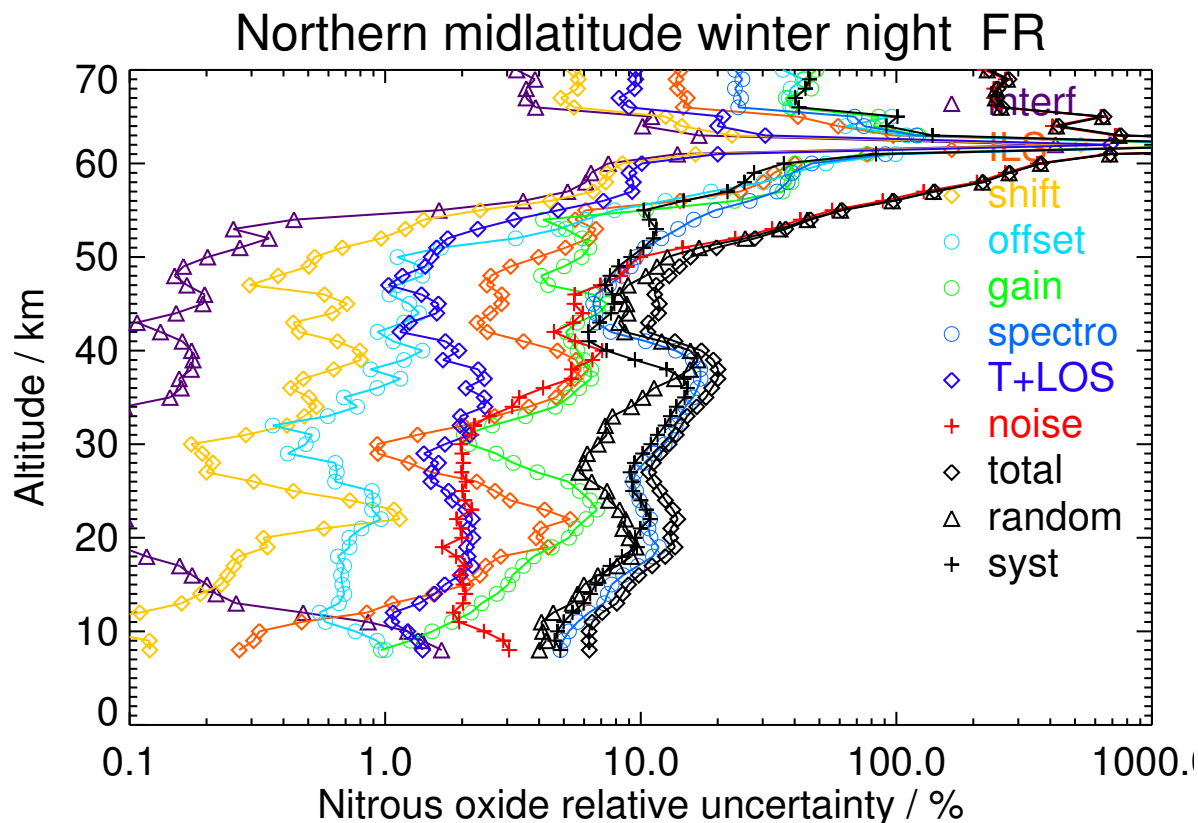

**Figure S146.** V8H\_N2O\_61 Northern midlatitude winter night

**Table S147.** Nitrous oxide error budget for Northern midlatitude spring day. All uncertainties are  $1\sigma$ .

| altitude (km) | mean target (ppbv) | interf (ppbv) | ILS (ppbv) | shift (ppbv) | offset (ppbv) | gain (ppbv) | spectro (ppbv) | T+LOS (ppbv) | noise (ppbv) | random (ppbv) | syst (ppbv) | total (ppbv) |
|---------------|--------------------|---------------|------------|--------------|---------------|-------------|----------------|--------------|--------------|---------------|-------------|--------------|
| 9             | 273.252            | 2.206         | 1.303      | 0.527        | 2.527         | 4.242       | 10.211         | 3.088        | 8.052        | 10.106        | 10.379      | 14.487       |
| 12            | 296.069            | 0.826         | 4.086      | 0.247        | 1.938         | 12.181      | 12.043         | 3.941        | 5.165        | 9.243         | 16.474      | 18.890       |
| 15            | 278.103            | 0.814         | 7.008      | 0.441        | 1.902         | 12.535      | 14.079         | 5.601        | 5.578        | 12.160        | 17.987      | 21.712       |
| 18            | 246.044            | 0.401         | 13.624     | 0.761        | 2.683         | 21.739      | 17.343         | 6.902        | 4.293        | 18.138        | 26.533      | 32.140       |
| 21            | 174.194            | 0.327         | 6.149      | 1.624        | 2.392         | 16.451      | 17.124         | 4.075        | 3.650        | 16.113        | 19.505      | 25.300       |
| 24            | 144.065            | 0.152         | 4.139      | 0.862        | 1.107         | 6.714       | 15.072         | 2.585        | 3.294        | 9.824         | 14.573      | 17.575       |
| 27            | 110.913            | 0.114         | 1.528      | 0.499        | 0.671         | 2.428       | 13.070         | 1.963        | 2.848        | 6.700         | 12.117      | 13.846       |
| 30            | 73.531             | 0.075         | 0.896      | 0.242        | 0.359         | 1.208       | 8.133          | 1.505        | 2.093        | 4.096         | 7.647       | 8.675        |
| 33            | 50.706             | 0.067         | 0.646      | 0.321        | 0.295         | 1.616       | 4.633          | 0.937        | 1.466        | 2.678         | 4.533       | 5.265        |
| 36            | 32.346             | 0.054         | 1.170      | 0.214        | 0.232         | 1.581       | 2.792          | 0.460        | 0.948        | 1.752         | 3.132       | 3.589        |
| 39            | 19.196             | 0.027         | 1.069      | 0.141        | 0.137         | 1.062       | 1.814          | 0.263        | 0.634        | 1.277         | 2.108       | 2.464        |
| 42            | 9.468              | 0.016         | 0.550      | 0.041        | 0.072         | 0.461       | 0.913          | 0.134        | 0.387        | 0.726         | 0.998       | 1.234        |
| 45            | 5.817              | 0.013         | 0.275      | 0.021        | 0.034         | 0.217       | 0.518          | 0.058        | 0.277        | 0.414         | 0.549       | 0.688        |
| 48            | 3.435              | 0.008         | 0.091      | 0.019        | 0.029         | 0.090       | 0.267          | 0.044        | 0.263        | 0.320         | 0.240       | 0.400        |
| 52            | 1.552              | 0.003         | 0.063      | 0.010        | 0.052         | 0.039       | 0.119          | 0.024        | 0.329        | 0.344         | 0.115       | 0.362        |
| 56            | 1.004              | 0.009         | 0.120      | 0.030        | 0.075         | 0.079       | 0.124          | 0.025        | 0.566        | 0.582         | 0.159       | 0.603        |
| 60            | 0.219              | 0.006         | 0.049      | 0.008        | 0.110         | 0.048       | 0.077          | 0.016        | 0.770        | 0.783         | 0.047       | 0.784        |
| 64            | -0.676             | 0.036         | 0.394      | 0.065        | 0.233         | 0.345       | 0.477          | 0.048        | 1.366        | 1.495         | 0.442       | 1.559        |
| 68            | -1.004             | 0.040         | 0.449      | 0.077        | 0.309         | 0.390       | 0.546          | 0.053        | 1.757        | 1.894         | 0.510       | 1.961        |

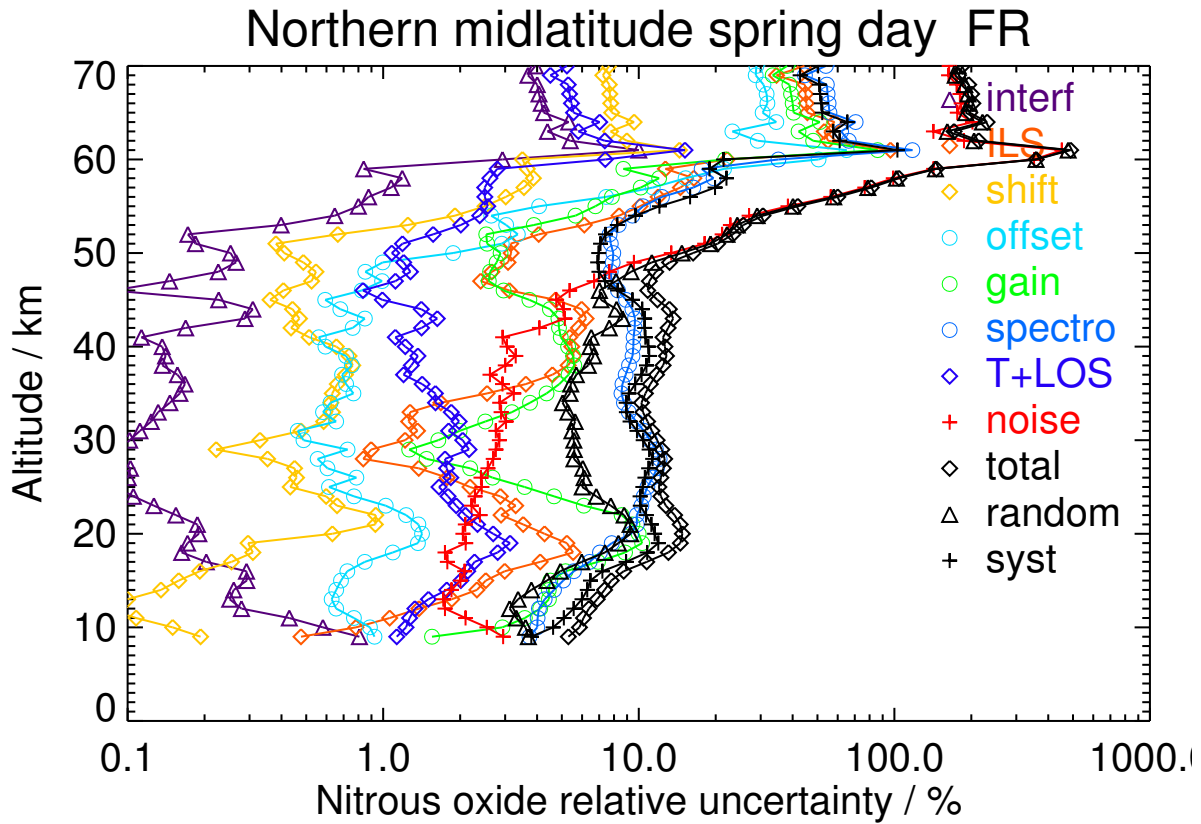

**Figure S147.** V8H\_N2O\_61 Northern midlatitude spring day



**Table S148.** Nitrous oxide error budget for Northern midlatitude spring night. All uncertainties are  $1\sigma$ .

| altitude (km) | mean target (ppbv) | interf (ppbv) | ILS (ppbv) | shift (ppbv) | offset (ppbv) | gain (ppbv) | spectro (ppbv) | T+LOS (ppbv) | noise (ppbv) | random (ppbv) | syst (ppbv) | total (ppbv) |
|---------------|--------------------|---------------|------------|--------------|---------------|-------------|----------------|--------------|--------------|---------------|-------------|--------------|
| 9             | 287.091            | 1.978         | 0.180      | 0.445        | 2.370         | 6.426       | 11.659         | 3.063        | 7.045        | 8.389         | 13.252      | 15.685       |
| 12            | 293.629            | 0.789         | 4.111      | 0.262        | 1.837         | 12.948      | 11.683         | 3.777        | 4.874        | 8.798         | 16.903      | 19.055       |
| 15            | 270.668            | 0.796         | 6.835      | 0.363        | 1.858         | 13.129      | 13.948         | 5.310        | 5.366        | 11.850        | 18.287      | 21.790       |
| 18            | 216.620            | 0.271         | 8.126      | 0.594        | 1.811         | 14.875      | 16.635         | 4.451        | 3.518        | 15.271        | 19.149      | 24.493       |
| 21            | 164.124            | 0.297         | 7.853      | 1.718        | 2.044         | 13.704      | 17.349         | 3.646        | 3.492        | 17.162        | 16.989      | 24.149       |
| 24            | 147.846            | 0.155         | 3.915      | 0.473        | 0.999         | 5.088       | 13.808         | 2.433        | 3.090        | 8.991         | 12.951      | 15.767       |
| 27            | 126.428            | 0.128         | 1.302      | 0.705        | 0.701         | 2.028       | 13.413         | 2.079        | 2.727        | 4.686         | 13.286      | 14.088       |
| 30            | 87.384             | 0.083         | 0.659      | 0.309        | 0.386         | 1.563       | 8.914          | 1.611        | 2.048        | 3.857         | 8.632       | 9.454        |
| 33            | 63.108             | 0.077         | 1.099      | 0.361        | 0.331         | 1.741       | 6.308          | 1.085        | 1.571        | 3.606         | 5.909       | 6.923        |
| 36            | 35.218             | 0.059         | 1.149      | 0.226        | 0.263         | 1.806       | 3.454          | 0.534        | 1.004        | 2.008         | 3.728       | 4.234        |
| 39            | 19.953             | 0.031         | 0.932      | 0.169        | 0.160         | 1.152       | 1.907          | 0.289        | 0.647        | 1.303         | 2.166       | 2.527        |
| 42            | 9.336              | 0.015         | 0.538      | 0.064        | 0.075         | 0.516       | 0.966          | 0.126        | 0.353        | 0.766         | 1.026       | 1.280        |
| 45            | 5.565              | 0.017         | 0.307      | 0.027        | 0.041         | 0.282       | 0.516          | 0.068        | 0.286        | 0.460         | 0.563       | 0.727        |
| 48            | 3.324              | 0.006         | 0.050      | 0.028        | 0.031         | 0.071       | 0.217          | 0.043        | 0.257        | 0.289         | 0.202       | 0.353        |
| 52            | 1.718              | 0.003         | 0.065      | 0.010        | 0.055         | 0.044       | 0.125          | 0.021        | 0.344        | 0.358         | 0.125       | 0.379        |
| 56            | 1.113              | 0.009         | 0.099      | 0.028        | 0.065         | 0.076       | 0.108          | 0.025        | 0.524        | 0.537         | 0.135       | 0.554        |
| 60            | 0.471              | 0.005         | 0.024      | 0.009        | 0.122         | 0.023       | 0.065          | 0.016        | 0.852        | 0.862         | 0.049       | 0.864        |
| 64            | -0.375             | 0.031         | 0.163      | 0.054        | 0.221         | 0.217       | 0.282          | 0.039        | 1.322        | 1.362         | 0.319       | 1.398        |
| 68            | -0.802             | 0.034         | 0.181      | 0.064        | 0.298         | 0.248       | 0.313          | 0.043        | 1.714        | 1.758         | 0.366       | 1.796        |

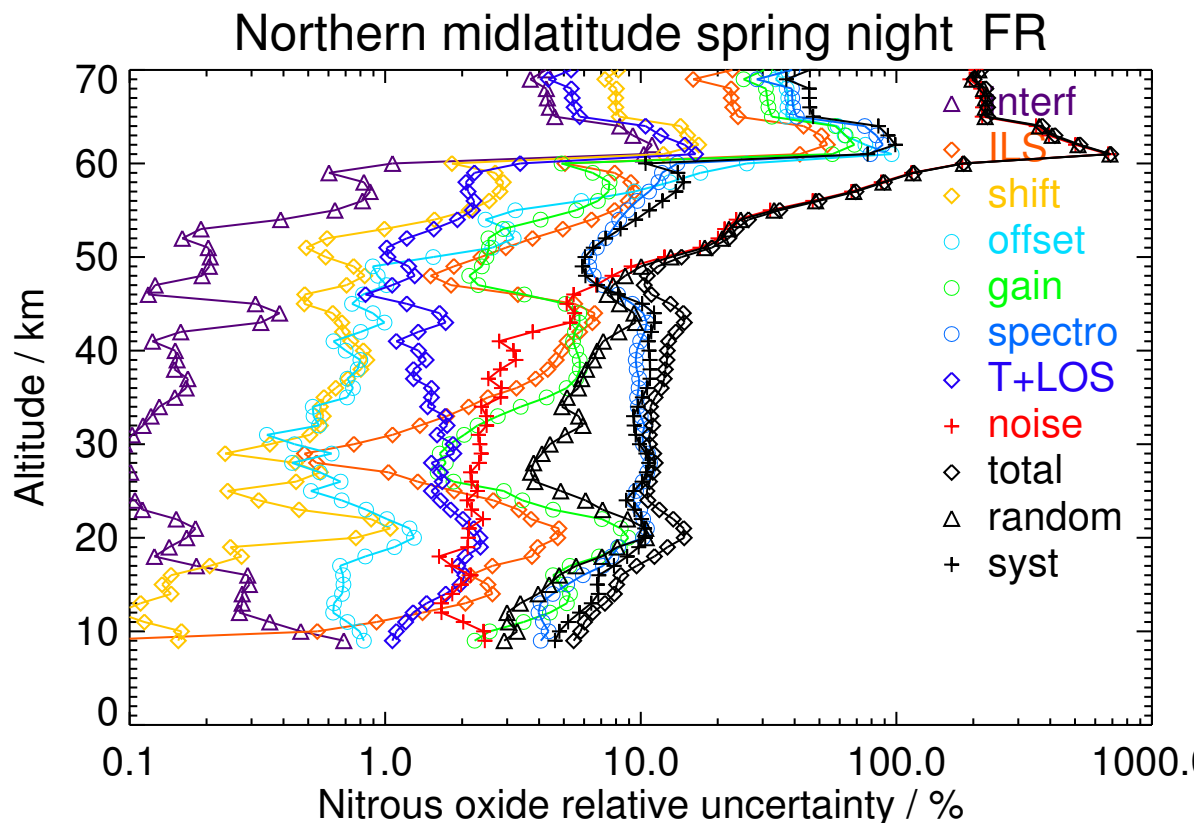

**Figure S148.** V8H\_N2O\_61 Northern midlatitude spring night



**Table S149.** Nitrous oxide error budget for Northern midlatitude summer day. All uncertainties are  $1\sigma$ .

| altitude (km) | mean target (ppbv) | interf (ppbv) | ILS (ppbv) | shift (ppbv) | offset (ppbv) | gain (ppbv) | spectro (ppbv) | T+LOS (ppbv) | noise (ppbv) | random (ppbv) | syst (ppbv) | total (ppbv) |
|---------------|--------------------|---------------|------------|--------------|---------------|-------------|----------------|--------------|--------------|---------------|-------------|--------------|
| 12            | 324.358            | 1.148         | 8.758      | 0.309        | 2.413         | 14.596      | 13.898         | 4.589        | 6.487        | 12.135        | 20.149      | 23.521       |
| 15            | 327.560            | 1.020         | 14.460     | 0.464        | 2.679         | 16.337      | 15.378         | 6.767        | 7.266        | 15.177        | 24.272      | 28.626       |
| 18            | 289.895            | 0.706         | 6.486      | 0.571        | 1.939         | 13.503      | 19.410         | 5.047        | 5.102        | 13.658        | 21.695      | 25.636       |
| 21            | 202.203            | 0.326         | 11.102     | 1.118        | 1.776         | 7.705       | 24.840         | 4.454        | 4.138        | 11.634        | 26.567      | 29.003       |
| 24            | 159.014            | 0.170         | 6.286      | 0.639        | 1.241         | 3.329       | 17.272         | 3.250        | 3.394        | 6.571         | 18.160      | 19.313       |
| 27            | 127.874            | 0.124         | 1.877      | 0.841        | 0.853         | 1.707       | 12.746         | 2.440        | 2.851        | 4.545         | 12.798      | 13.581       |
| 30            | 91.231             | 0.086         | 0.405      | 0.279        | 0.490         | 1.593       | 10.211         | 1.925        | 2.021        | 3.403         | 10.173      | 10.727       |
| 33            | 49.341             | 0.055         | 1.003      | 0.342        | 0.290         | 1.302       | 4.885          | 1.046        | 1.371        | 2.104         | 5.031       | 5.453        |
| 36            | 30.162             | 0.038         | 1.226      | 0.202        | 0.214         | 1.411       | 2.862          | 0.469        | 0.863        | 1.365         | 3.298       | 3.569        |
| 39            | 15.033             | 0.019         | 0.873      | 0.103        | 0.116         | 0.919       | 1.618          | 0.247        | 0.503        | 0.965         | 1.906       | 2.137        |
| 42            | 6.416              | 0.009         | 0.316      | 0.037        | 0.052         | 0.373       | 0.686          | 0.083        | 0.245        | 0.529         | 0.708       | 0.883        |
| 45            | 3.235              | 0.012         | 0.194      | 0.013        | 0.036         | 0.231       | 0.356          | 0.069        | 0.272        | 0.436         | 0.328       | 0.546        |
| 48            | 1.672              | 0.006         | 0.061      | 0.023        | 0.034         | 0.084       | 0.183          | 0.034        | 0.233        | 0.298         | 0.114       | 0.319        |
| 52            | 1.396              | 0.004         | 0.053      | 0.009        | 0.052         | 0.056       | 0.115          | 0.014        | 0.326        | 0.350         | 0.078       | 0.358        |
| 56            | 0.957              | 0.009         | 0.066      | 0.020        | 0.050         | 0.066       | 0.108          | 0.022        | 0.422        | 0.441         | 0.084       | 0.449        |
| 60            | 0.645              | 0.005         | 0.049      | 0.015        | 0.127         | 0.037       | 0.093          | 0.021        | 0.884        | 0.896         | 0.081       | 0.900        |
| 64            | -1.515             | 0.045         | 0.244      | 0.074        | 0.194         | 0.355       | 0.444          | 0.062        | 1.174        | 1.216         | 0.575       | 1.345        |
| 68            | -2.398             | 0.054         | 0.295      | 0.097        | 0.277         | 0.442       | 0.565          | 0.073        | 1.591        | 1.638         | 0.737       | 1.796        |

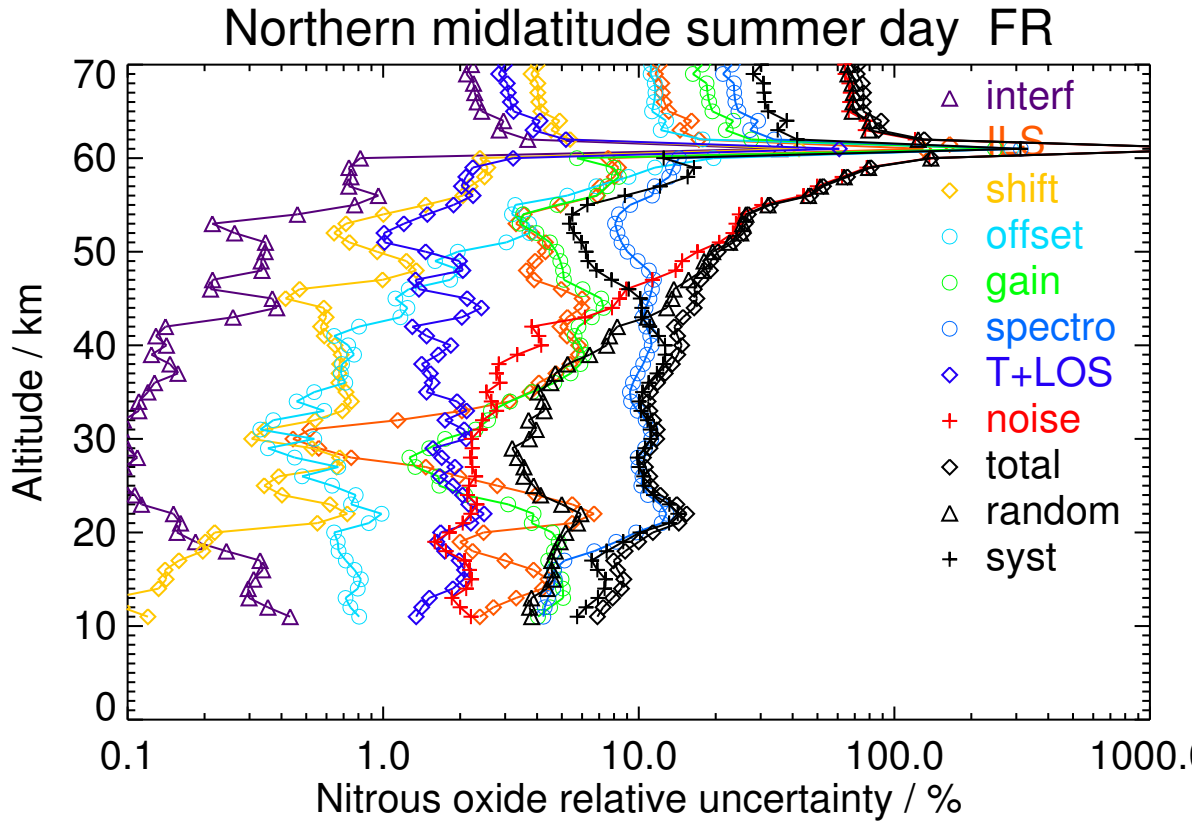

**Figure S149.** V8H\_N2O\_61 Northern midlatitude summer day

**Table S150.** Nitrous oxide error budget for Northern midlatitude summer night. All uncertainties are  $1\sigma$ .

| altitude (km) | mean target (ppbv) | interf (ppbv) | ILS (ppbv) | shift (ppbv) | offset (ppbv) | gain (ppbv) | spectro (ppbv) | T+LOS (ppbv) | noise (ppbv) | random (ppbv) | syst (ppbv) | total (ppbv) |
|---------------|--------------------|---------------|------------|--------------|---------------|-------------|----------------|--------------|--------------|---------------|-------------|--------------|
| 12            | 321.032            | 1.237         | 6.139      | 0.303        | 2.472         | 12.113      | 12.284         | 4.666        | 6.900        | 11.432        | 16.784      | 20.308       |
| 15            | 321.694            | 0.978         | 9.842      | 0.155        | 2.101         | 14.145      | 13.423         | 5.640        | 6.107        | 13.198        | 19.427      | 23.487       |
| 18            | 273.812            | 0.628         | 5.145      | 0.330        | 1.472         | 8.748       | 19.129         | 4.966        | 5.004        | 12.354        | 19.200      | 22.832       |
| 21            | 194.118            | 0.286         | 9.944      | 0.625        | 1.296         | 2.834       | 24.039         | 4.036        | 3.906        | 7.290         | 25.794      | 26.804       |
| 24            | 151.936            | 0.163         | 6.211      | 0.329        | 1.094         | 2.751       | 16.942         | 3.195        | 3.312        | 5.631         | 17.999      | 18.859       |
| 27            | 126.456            | 0.117         | 1.769      | 0.668        | 0.744         | 1.437       | 13.436         | 2.300        | 2.745        | 4.206         | 13.486      | 14.127       |
| 30            | 83.408             | 0.083         | 0.308      | 0.127        | 0.440         | 1.538       | 9.226          | 1.694        | 1.915        | 3.179         | 9.178       | 9.713        |
| 33            | 49.115             | 0.055         | 0.924      | 0.340        | 0.268         | 1.152       | 4.843          | 0.902        | 1.328        | 2.002         | 4.939       | 5.329        |
| 36            | 26.689             | 0.043         | 0.959      | 0.129        | 0.159         | 0.989       | 2.704          | 0.409        | 0.845        | 1.213         | 2.943       | 3.183        |
| 39            | 13.688             | 0.024         | 0.591      | 0.087        | 0.088         | 0.649       | 1.276          | 0.194        | 0.489        | 0.769         | 1.449       | 1.640        |
| 42            | 7.167              | 0.011         | 0.251      | 0.040        | 0.046         | 0.332       | 0.566          | 0.070        | 0.252        | 0.465         | 0.592       | 0.752        |
| 45            | 5.022              | 0.017         | 0.249      | 0.020        | 0.047         | 0.316       | 0.386          | 0.075        | 0.304        | 0.453         | 0.455       | 0.642        |
| 48            | 3.774              | 0.008         | 0.145      | 0.039        | 0.045         | 0.231       | 0.372          | 0.038        | 0.263        | 0.467         | 0.261       | 0.536        |
| 52            | 1.885              | 0.005         | 0.093      | 0.014        | 0.056         | 0.077       | 0.210          | 0.025        | 0.378        | 0.428         | 0.150       | 0.454        |
| 56            | 1.048              | 0.011         | 0.062      | 0.024        | 0.045         | 0.055       | 0.119          | 0.028        | 0.399        | 0.419         | 0.090       | 0.429        |
| 60            | 1.257              | 0.005         | 0.049      | 0.015        | 0.156         | 0.030       | 0.088          | 0.019        | 1.081        | 1.094         | 0.082       | 1.097        |
| 64            | 0.072              | 0.038         | 0.171      | 0.061        | 0.180         | 0.219       | 0.280          | 0.043        | 1.169        | 1.193         | 0.372       | 1.250        |
| 68            | -0.434             | 0.048         | 0.228      | 0.084        | 0.240         | 0.290       | 0.374          | 0.053        | 1.428        | 1.460         | 0.504       | 1.544        |

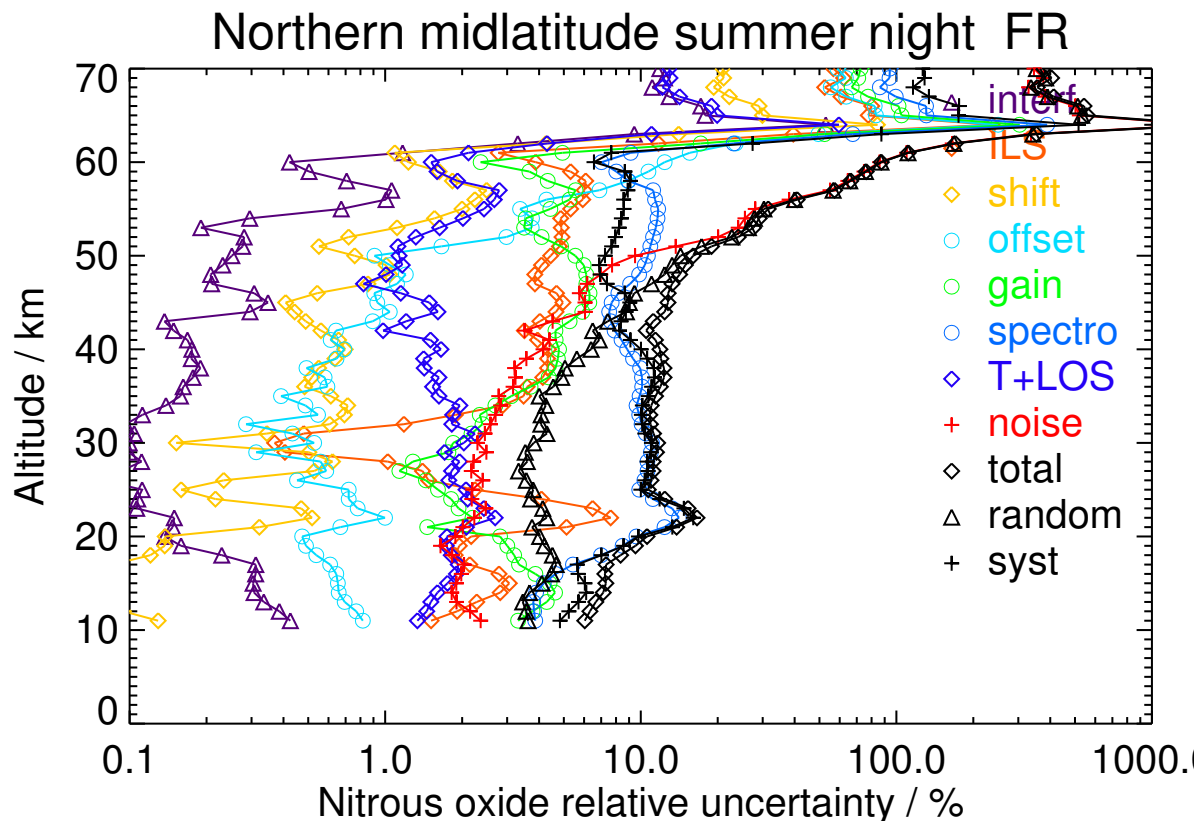

**Figure S150.** V8H\_N2O\_61 Northern midlatitude summer night

**Table S151.** Nitrous oxide error budget for Northern midlatitude autumn day. All uncertainties are  $1\sigma$ .

| altitude<br>(km) | mean target<br>(ppbv) | interf<br>(ppbv) | ILS<br>(ppbv) | shift<br>(ppbv) | offset<br>(ppbv) | gain<br>(ppbv) | spectro<br>(ppbv) | T+LOS<br>(ppbv) | noise<br>(ppbv) | random<br>(ppbv) | syst<br>(ppbv) | total<br>(ppbv) |
|------------------|-----------------------|------------------|---------------|-----------------|------------------|----------------|-------------------|-----------------|-----------------|------------------|----------------|-----------------|
| 12               | 329.761               | 1.181            | 9.979         | 0.245           | 2.901            | 13.423         | 14.562            | 5.434           | 7.468           | 14.832           | 19.157         | 24.227          |
| 15               | 327.229               | 1.062            | 13.716        | 0.303           | 2.595            | 15.984         | 16.023            | 6.652           | 6.572           | 16.997           | 22.514         | 28.209          |
| 18               | 271.923               | 0.652            | 15.359        | 0.492           | 2.262            | 16.042         | 17.839            | 7.184           | 5.092           | 22.878           | 19.272         | 29.914          |
| 21               | 191.734               | 0.301            | 11.240        | 0.776           | 1.809            | 10.117         | 27.204            | 5.024           | 4.293           | 17.826           | 26.431         | 31.881          |
| 24               | 138.949               | 0.118            | 8.068         | 0.562           | 1.139            | 4.011          | 18.018            | 3.025           | 3.551           | 8.044            | 19.092         | 20.718          |
| 27               | 112.199               | 0.094            | 2.031         | 0.304           | 0.740            | 1.505          | 12.399            | 1.965           | 2.829           | 5.003            | 12.150         | 13.140          |
| 30               | 83.644                | 0.077            | 0.723         | 0.133           | 0.453            | 1.306          | 9.454             | 1.527           | 2.090           | 4.324            | 8.935          | 9.926           |
| 33               | 51.952                | 0.055            | 0.868         | 0.241           | 0.287            | 1.372          | 5.677             | 0.904           | 1.505           | 3.306            | 5.212          | 6.172           |
| 36               | 33.025                | 0.047            | 0.933         | 0.150           | 0.241            | 1.430          | 3.095             | 0.444           | 1.088           | 2.047            | 3.125          | 3.736           |
| 39               | 23.614                | 0.034            | 0.965         | 0.192           | 0.212            | 1.418          | 1.855             | 0.279           | 0.710           | 1.394            | 2.259          | 2.654           |
| 42               | 15.459                | 0.014            | 0.735         | 0.122           | 0.126            | 0.974          | 1.294             | 0.169           | 0.428           | 0.980            | 1.564          | 1.845           |
| 45               | 9.040                 | 0.020            | 0.474         | 0.041           | 0.092            | 0.625          | 0.895             | 0.135           | 0.462           | 0.837            | 0.979          | 1.288           |
| 48               | 4.833                 | 0.005            | 0.138         | 0.037           | 0.062            | 0.168          | 0.469             | 0.055           | 0.377           | 0.513            | 0.394          | 0.646           |
| 52               | 3.477                 | 0.008            | 0.126         | 0.019           | 0.066            | 0.109          | 0.254             | 0.034           | 0.482           | 0.501            | 0.283          | 0.575           |
| 56               | 1.527                 | 0.013            | 0.047         | 0.022           | 0.061            | 0.049          | 0.148             | 0.037           | 0.502           | 0.518            | 0.130          | 0.534           |
| 60               | 0.282                 | 0.014            | 0.054         | 0.011           | 0.203            | 0.048          | 0.088             | 0.025           | 1.348           | 1.366            | 0.076          | 1.368           |
| 64               | -0.940                | 0.029            | 0.144         | 0.040           | 0.215            | 0.213          | 0.240             | 0.054           | 1.413           | 1.437            | 0.324          | 1.473           |
| 68               | -1.239                | 0.033            | 0.163         | 0.054           | 0.244            | 0.278          | 0.300             | 0.064           | 1.506           | 1.536            | 0.410          | 1.590           |

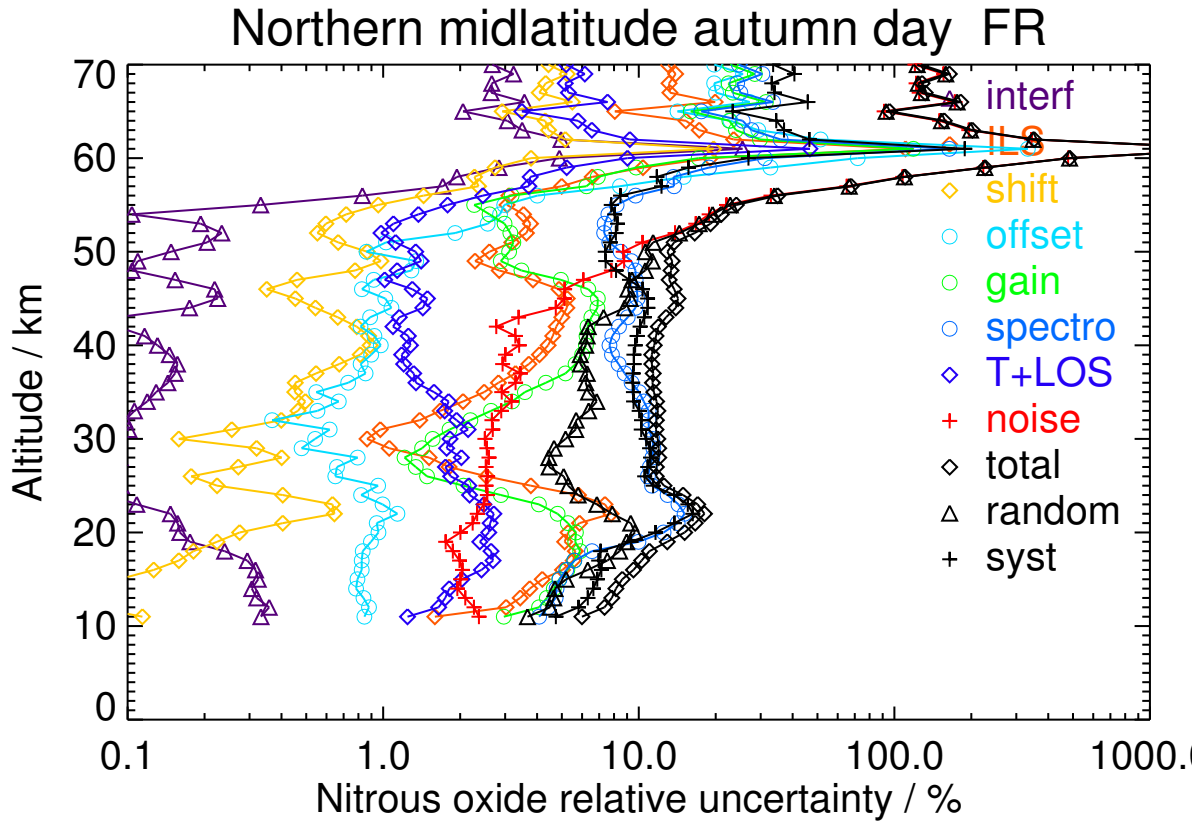

**Figure S151.** V8H\_N2O\_61 Northern midlatitude autumn day

**Table S152.** Nitrous oxide error budget for Northern midlatitude autumn night. All uncertainties are  $1\sigma$ .

| altitude (km) | mean target (ppbv) | interf (ppbv) | ILS (ppbv) | shift (ppbv) | offset (ppbv) | gain (ppbv) | spectro (ppbv) | T+LOS (ppbv) | noise (ppbv) | random (ppbv) | syst (ppbv) | total (ppbv) |
|---------------|--------------------|---------------|------------|--------------|---------------|-------------|----------------|--------------|--------------|---------------|-------------|--------------|
| 9             | 305.986            | 1.784         | 3.312      | 0.507        | 2.684         | 11.972      | 11.897         | 3.304        | 7.279        | 11.435        | 15.480      | 19.246       |
| 12            | 323.099            | 0.843         | 5.993      | 0.422        | 2.354         | 14.695      | 12.709         | 4.260        | 5.684        | 10.935        | 18.727      | 21.686       |
| 15            | 317.796            | 0.784         | 10.103     | 0.560        | 2.264         | 17.443      | 13.366         | 5.787        | 5.872        | 13.311        | 21.950      | 25.671       |
| 18            | 278.058            | 0.462         | 16.349     | 0.783        | 2.359         | 19.570      | 15.949         | 7.529        | 5.221        | 20.819        | 23.697      | 31.543       |
| 21            | 202.219            | 0.325         | 12.053     | 0.826        | 2.257         | 15.135      | 21.675         | 5.770        | 4.359        | 21.077        | 21.403      | 30.039       |
| 24            | 150.996            | 0.157         | 9.126      | 0.995        | 1.409         | 7.513       | 18.341         | 3.347        | 3.570        | 11.571        | 19.214      | 22.429       |
| 27            | 118.141            | 0.101         | 2.159      | 0.352        | 0.741         | 2.712       | 14.348         | 2.058        | 2.883        | 6.186         | 13.887      | 15.203       |
| 30            | 76.288             | 0.064         | 1.042      | 0.159        | 0.373         | 1.478       | 9.308          | 1.493        | 2.009        | 4.448         | 8.750       | 9.815        |
| 33            | 49.085             | 0.048         | 0.979      | 0.230        | 0.251         | 1.611       | 5.526          | 0.882        | 1.367        | 3.359         | 5.057       | 6.071        |
| 36            | 28.568             | 0.042         | 1.127      | 0.159        | 0.193         | 1.422       | 3.304          | 0.444        | 0.897        | 2.445         | 3.049       | 3.909        |
| 39            | 18.159             | 0.027         | 0.894      | 0.127        | 0.145         | 1.138       | 1.944          | 0.238        | 0.591        | 1.631         | 1.912       | 2.513        |
| 42            | 11.585             | 0.013         | 0.611      | 0.081        | 0.101         | 0.778       | 1.146          | 0.156        | 0.431        | 1.107         | 1.138       | 1.587        |
| 45            | 7.123              | 0.015         | 0.385      | 0.040        | 0.076         | 0.463       | 0.729          | 0.120        | 0.428        | 0.749         | 0.734       | 1.049        |
| 48            | 3.753              | 0.004         | 0.126      | 0.025        | 0.057         | 0.136       | 0.365          | 0.045        | 0.373        | 0.474         | 0.297       | 0.559        |
| 52            | 2.819              | 0.008         | 0.137      | 0.017        | 0.063         | 0.131       | 0.222          | 0.033        | 0.479        | 0.518         | 0.228       | 0.566        |
| 56            | 1.585              | 0.010         | 0.061      | 0.021        | 0.066         | 0.097       | 0.130          | 0.038        | 0.511        | 0.534         | 0.109       | 0.545        |
| 60            | 0.544              | 0.016         | 0.096      | 0.016        | 0.209         | 0.113       | 0.116          | 0.030        | 1.317        | 1.345         | 0.086       | 1.347        |
| 64            | -0.318             | 0.027         | 0.145      | 0.036        | 0.233         | 0.222       | 0.210          | 0.047        | 1.450        | 1.486         | 0.261       | 1.509        |
| 68            | -0.643             | 0.025         | 0.140      | 0.040        | 0.251         | 0.237       | 0.219          | 0.047        | 1.517        | 1.555         | 0.272       | 1.578        |

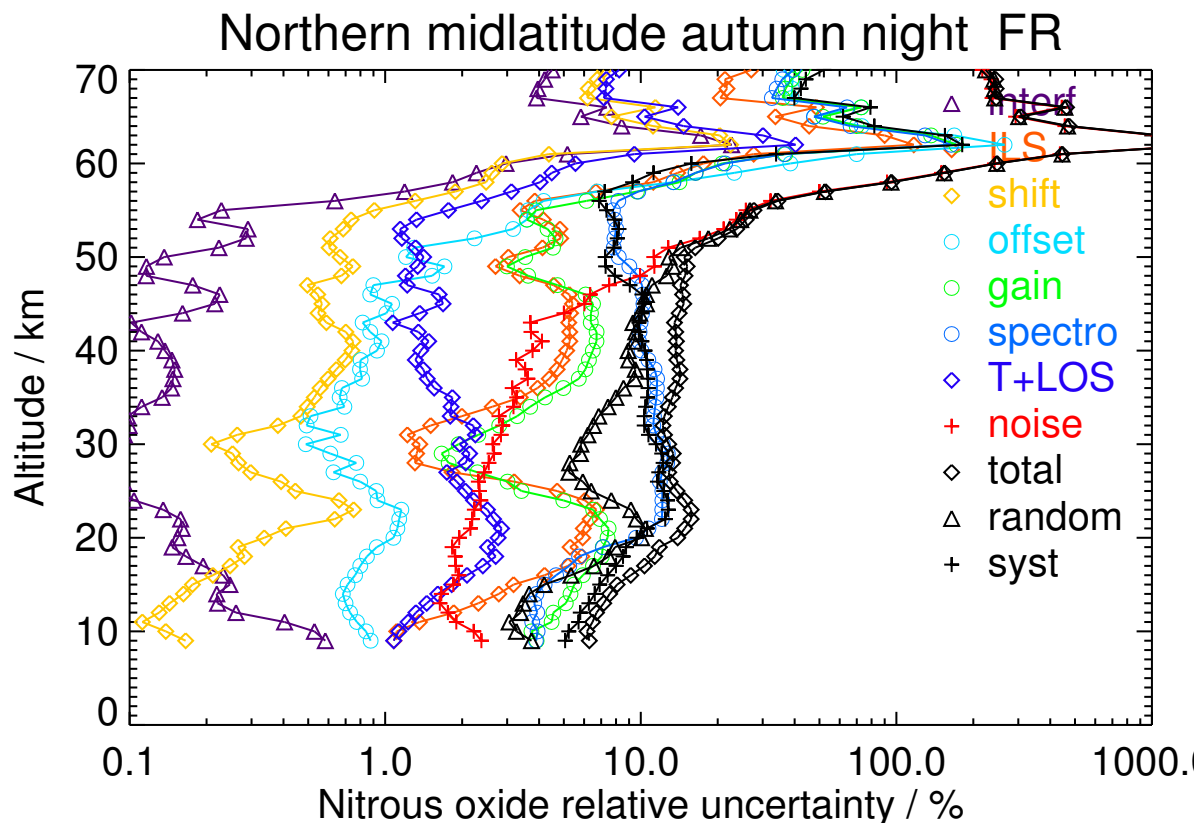

**Figure S152.** V8H\_N2O\_61 Northern midlatitude autumn night

**Table S153.** Nitrous oxide error budget for Tropics day. All uncertainties are  $1\sigma$ .

| altitude (km) | mean target (ppbv) | interf (ppbv) | ILS (ppbv) | shift (ppbv) | offset (ppbv) | gain (ppbv) | spectro (ppbv) | T+LOS (ppbv) | noise (ppbv) | random (ppbv) | syst (ppbv) | total (ppbv) |
|---------------|--------------------|---------------|------------|--------------|---------------|-------------|----------------|--------------|--------------|---------------|-------------|--------------|
| 12            | 339.045            | 1.133         | 11.457     | 1.384        | 2.415         | 13.349      | 17.333         | 5.042        | 7.605        | 14.154        | 22.402      | 26.499       |
| 15            | 342.644            | 1.590         | 17.717     | 2.232        | 3.521         | 10.696      | 23.521         | 8.735        | 9.470        | 16.961        | 29.661      | 34.167       |
| 18            | 320.546            | 1.160         | 12.006     | 1.824        | 3.118         | 7.629       | 16.328         | 7.478        | 8.009        | 15.747        | 18.854      | 24.564       |
| 21            | 284.343            | 0.519         | 4.141      | 0.527        | 2.369         | 3.881       | 21.962         | 5.072        | 6.481        | 9.823         | 22.180      | 24.258       |
| 24            | 270.109            | 0.192         | 6.618      | 0.832        | 1.233         | 5.271       | 24.586         | 3.695        | 4.500        | 6.970         | 25.761      | 26.687       |
| 27            | 236.494            | 0.111         | 2.021      | 0.884        | 0.902         | 4.368       | 22.989         | 3.148        | 3.697        | 5.996         | 23.257      | 24.018       |
| 30            | 196.282            | 0.088         | 2.024      | 0.507        | 0.565         | 4.212       | 19.044         | 2.548        | 2.775        | 5.326         | 19.259      | 19.982       |
| 33            | 142.918            | 0.073         | 1.232      | 0.710        | 0.449         | 3.178       | 12.808         | 1.739        | 2.148        | 3.869         | 13.001      | 13.565       |
| 36            | 90.103             | 0.068         | 2.490      | 0.570        | 0.409         | 2.850       | 7.447          | 0.917        | 1.336        | 2.450         | 8.179       | 8.538        |
| 39            | 49.489             | 0.057         | 2.347      | 0.350        | 0.324         | 2.614       | 4.446          | 0.501        | 0.800        | 1.415         | 5.588       | 5.765        |
| 42            | 24.588             | 0.019         | 1.667      | 0.202        | 0.246         | 1.997       | 2.718          | 0.308        | 0.610        | 1.291         | 3.613       | 3.837        |
| 45            | 10.332             | 0.010         | 0.595      | 0.023        | 0.075         | 0.695       | 1.262          | 0.119        | 0.340        | 0.704         | 1.439       | 1.602        |
| 48            | 3.989              | 0.008         | 0.094      | 0.068        | 0.047         | 0.163       | 0.425          | 0.079        | 0.298        | 0.443         | 0.349       | 0.564        |
| 52            | 2.479              | 0.003         | 0.084      | 0.015        | 0.051         | 0.093       | 0.160          | 0.034        | 0.318        | 0.343         | 0.169       | 0.382        |
| 56            | 1.360              | 0.009         | 0.118      | 0.029        | 0.092         | 0.164       | 0.197          | 0.037        | 0.642        | 0.673         | 0.224       | 0.709        |
| 60            | 0.209              | 0.011         | 0.048      | 0.013        | 0.114         | 0.126       | 0.149          | 0.032        | 0.801        | 0.823         | 0.141       | 0.835        |
| 64            | -1.210             | 0.038         | 0.201      | 0.071        | 0.248         | 0.490       | 0.544          | 0.093        | 1.468        | 1.516         | 0.715       | 1.676        |
| 68            | -1.455             | 0.043         | 0.229      | 0.084        | 0.306         | 0.560       | 0.629          | 0.104        | 1.770        | 1.824         | 0.826       | 2.002        |

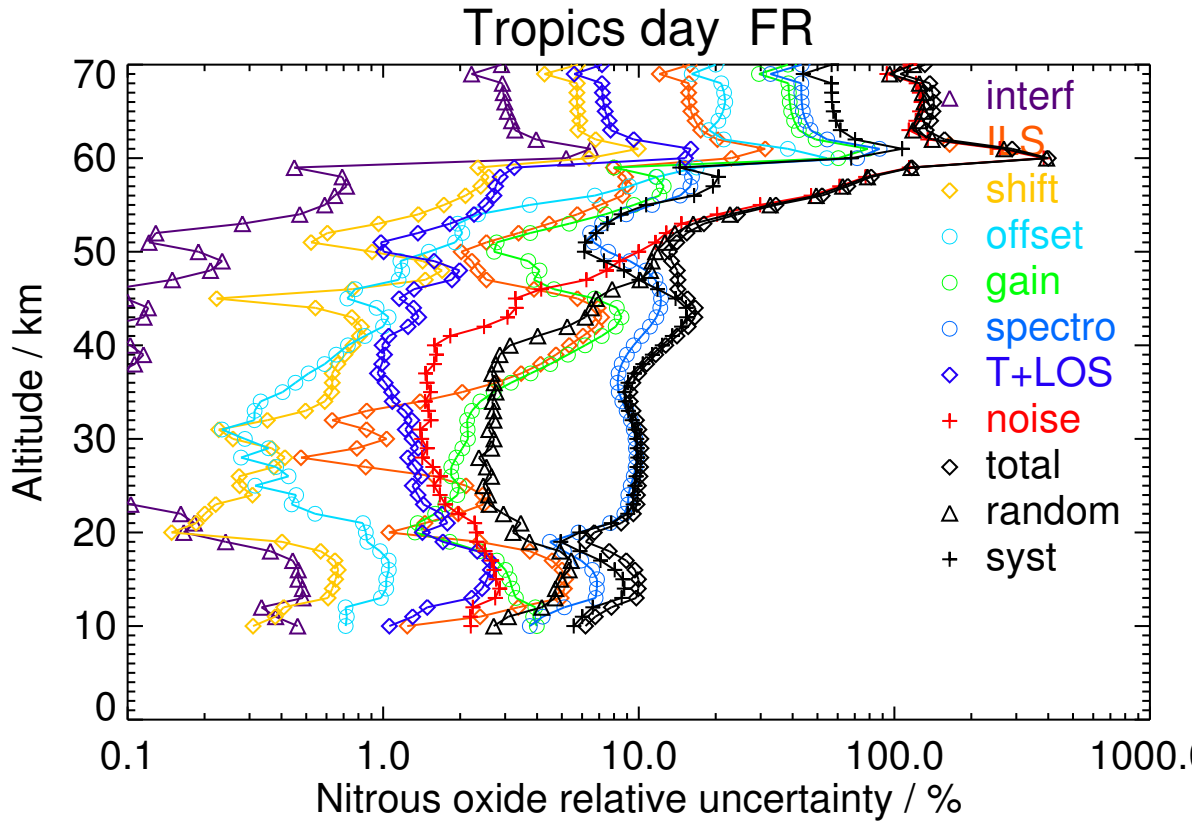

**Figure S153.** V8H\_N2O\_61 Tropics day

**Table S154.** Nitrous oxide error budget for Tropics night. All uncertainties are  $1\sigma$ .

| altitude (km) | mean target (ppbv) | interf (ppbv) | ILS (ppbv) | shift (ppbv) | offset (ppbv) | gain (ppbv) | spectro (ppbv) | T+LOS (ppbv) | noise (ppbv) | random (ppbv) | syst (ppbv) | total (ppbv) |
|---------------|--------------------|---------------|------------|--------------|---------------|-------------|----------------|--------------|--------------|---------------|-------------|--------------|
| 12            | 338.906            | 1.175         | 3.068      | 0.928        | 2.022         | 15.548      | 14.909         | 4.132        | 7.181        | 11.083        | 20.629      | 23.418       |
| 15            | 339.080            | 1.625         | 12.064     | 2.845        | 3.370         | 10.229      | 18.782         | 7.564        | 9.005        | 19.311        | 19.759      | 27.628       |
| 18            | 327.831            | 1.294         | 8.719      | 2.363        | 3.322         | 8.160       | 16.584         | 6.937        | 8.320        | 16.126        | 17.123      | 23.521       |
| 21            | 298.023            | 0.587         | 4.520      | 0.711        | 2.417         | 4.182       | 24.741         | 5.079        | 6.816        | 10.032        | 25.066      | 26.999       |
| 24            | 275.612            | 0.223         | 4.471      | 0.628        | 1.247         | 5.098       | 24.461         | 3.812        | 4.628        | 6.841         | 25.209      | 26.121       |
| 27            | 248.078            | 0.116         | 0.796      | 1.025        | 0.905         | 4.999       | 21.788         | 3.175        | 3.719        | 5.751         | 22.205      | 22.937       |
| 30            | 213.112            | 0.092         | 1.613      | 0.620        | 0.599         | 4.441       | 20.258         | 2.760        | 2.836        | 4.993         | 20.596      | 21.192       |
| 33            | 155.545            | 0.081         | 1.662      | 0.793        | 0.451         | 3.201       | 13.213         | 1.818        | 2.259        | 3.675         | 13.541      | 14.030       |
| 36            | 99.971             | 0.076         | 2.552      | 0.554        | 0.444         | 3.046       | 7.674          | 0.960        | 1.431        | 2.408         | 8.506       | 8.840        |
| 39            | 54.845             | 0.066         | 2.253      | 0.368        | 0.319         | 2.591       | 4.597          | 0.550        | 0.877        | 1.437         | 5.672       | 5.851        |
| 42            | 26.277             | 0.016         | 1.544      | 0.215        | 0.222         | 1.929       | 2.734          | 0.289        | 0.583        | 1.076         | 3.597       | 3.755        |
| 45            | 11.233             | 0.016         | 0.691      | 0.045        | 0.094         | 0.831       | 1.364          | 0.135        | 0.394        | 0.681         | 1.658       | 1.793        |
| 48            | 3.931              | 0.009         | 0.113      | 0.078        | 0.049         | 0.167       | 0.419          | 0.086        | 0.304        | 0.434         | 0.369       | 0.570        |
| 52            | 2.450              | 0.003         | 0.068      | 0.013        | 0.055         | 0.075       | 0.136          | 0.029        | 0.336        | 0.354         | 0.142       | 0.381        |
| 56            | 1.411              | 0.008         | 0.130      | 0.034        | 0.075         | 0.187       | 0.197          | 0.036        | 0.530        | 0.555         | 0.267       | 0.616        |
| 60            | 0.275              | 0.006         | 0.019      | 0.008        | 0.110         | 0.054       | 0.082          | 0.023        | 0.781        | 0.792         | 0.079       | 0.796        |
| 64            | -1.056             | 0.042         | 0.238      | 0.088        | 0.233         | 0.591       | 0.653          | 0.108        | 1.360        | 1.427         | 0.849       | 1.660        |
| 68            | -1.251             | 0.048         | 0.271      | 0.106        | 0.301         | 0.687       | 0.769          | 0.125        | 1.724        | 1.799         | 0.996       | 2.056        |

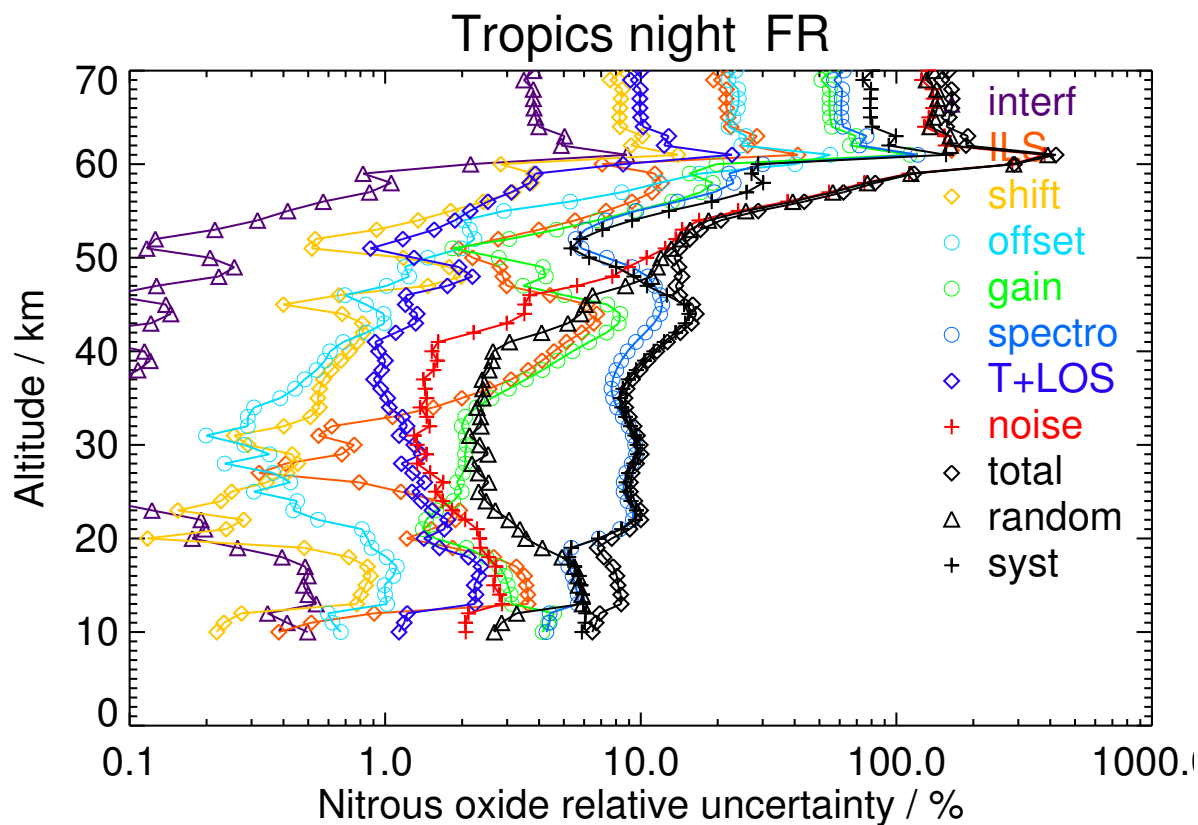

**Figure S154.** V8H\_N2O\_61 Tropics night

**Table S155.** Nitrous oxide error budget for Southern midlatitude winter day. All uncertainties are  $1\sigma$ .

| altitude (km) | mean target (ppbv) | interf (ppbv) | ILS (ppbv) | shift (ppbv) | offset (ppbv) | gain (ppbv) | spectro (ppbv) | T+LOS (ppbv) | noise (ppbv) | random (ppbv) | syst (ppbv) | total (ppbv) |
|---------------|--------------------|---------------|------------|--------------|---------------|-------------|----------------|--------------|--------------|---------------|-------------|--------------|
| 9             | 317.458            | 2.966         | 2.464      | 0.341        | 3.085         | 11.436      | 12.508         | 4.663        | 8.069        | 11.606        | 16.245      | 19.965       |
| 12            | 302.769            | 0.692         | 4.838      | 0.365        | 2.291         | 11.664      | 12.666         | 4.600        | 6.119        | 10.081        | 16.814      | 19.605       |
| 15            | 293.801            | 0.667         | 8.686      | 0.558        | 1.963         | 13.524      | 13.690         | 5.982        | 5.687        | 11.310        | 19.763      | 22.771       |
| 18            | 277.230            | 0.480         | 16.436     | 0.893        | 2.368         | 20.529      | 14.634         | 9.558        | 5.582        | 17.798        | 26.798      | 32.170       |
| 21            | 232.914            | 0.431         | 5.328      | 0.987        | 2.196         | 16.013      | 20.403         | 5.574        | 4.703        | 11.979        | 24.834      | 27.573       |
| 24            | 171.451            | 0.220         | 6.214      | 1.504        | 1.350         | 8.797       | 21.298         | 3.301        | 4.101        | 9.482         | 22.617      | 24.525       |
| 27            | 142.070            | 0.144         | 2.111      | 0.697        | 0.862         | 4.730       | 15.355         | 2.590        | 3.536        | 6.751         | 15.411      | 16.825       |
| 30            | 110.185            | 0.096         | 1.261      | 0.363        | 0.522         | 2.715       | 14.781         | 2.291        | 2.739        | 6.682         | 13.999      | 15.512       |
| 33            | 45.146             | 0.045         | 1.892      | 0.219        | 0.292         | 1.196       | 8.031          | 1.270        | 1.685        | 4.420         | 7.386       | 8.608        |
| 36            | 17.891             | 0.032         | 0.885      | 0.115        | 0.161         | 0.828       | 2.994          | 0.457        | 0.945        | 2.293         | 2.513       | 3.402        |
| 39            | 7.097              | 0.011         | 0.412      | 0.072        | 0.066         | 0.381       | 1.347          | 0.182        | 0.535        | 1.137         | 1.080       | 1.568        |
| 42            | 2.650              | 0.008         | 0.146      | 0.037        | 0.048         | 0.225       | 0.384          | 0.085        | 0.331        | 0.535         | 0.232       | 0.583        |
| 45            | 2.329              | 0.009         | 0.131      | 0.054        | 0.079         | 0.399       | 0.156          | 0.093        | 0.370        | 0.543         | 0.246       | 0.596        |
| 48            | 1.899              | 0.003         | 0.046      | 0.012        | 0.064         | 0.076       | 0.153          | 0.023        | 0.428        | 0.453         | 0.118       | 0.468        |
| 52            | 1.671              | 0.007         | 0.100      | 0.017        | 0.073         | 0.076       | 0.135          | 0.027        | 0.544        | 0.568         | 0.113       | 0.580        |
| 56            | 1.078              | 0.013         | 0.100      | 0.026        | 0.082         | 0.119       | 0.102          | 0.042        | 0.575        | 0.606         | 0.089       | 0.612        |
| 60            | 0.452              | 0.019         | 0.110      | 0.027        | 0.212         | 0.089       | 0.105          | 0.036        | 1.368        | 1.395         | 0.061       | 1.396        |
| 64            | -0.232             | 0.022         | 0.107      | 0.033        | 0.237         | 0.120       | 0.115          | 0.038        | 1.488        | 1.516         | 0.109       | 1.520        |
| 68            | -0.257             | 0.015         | 0.059      | 0.024        | 0.257         | 0.158       | 0.089          | 0.037        | 1.536        | 1.564         | 0.135       | 1.570        |

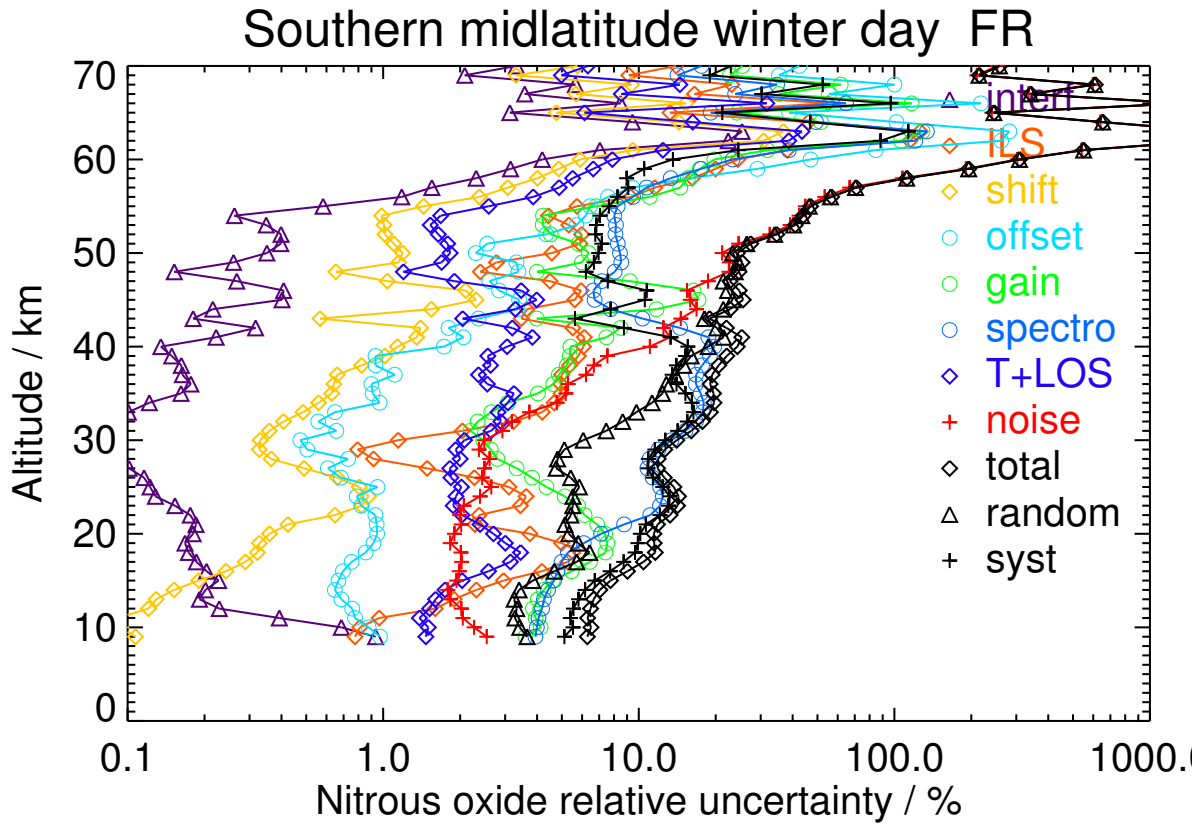

**Figure S155.** V8H\_N2O\_61 Southern midlatitude winter day



**Table S156.** Nitrous oxide error budget for Southern midlatitude winter night. All uncertainties are  $1\sigma$ .

| altitude (km) | mean target (ppbv) | interf (ppbv) | ILS (ppbv) | shift (ppbv) | offset (ppbv) | gain (ppbv) | spectro (ppbv) | T+LOS (ppbv) | noise (ppbv) | random (ppbv) | syst (ppbv) | total (ppbv) |
|---------------|--------------------|---------------|------------|--------------|---------------|-------------|----------------|--------------|--------------|---------------|-------------|--------------|
| 9             | 316.750            | 3.351         | 2.314      | 0.272        | 3.126         | 13.029      | 12.300         | 5.013        | 7.787        | 12.820        | 16.398      | 20.815       |
| 12            | 310.582            | 0.906         | 5.447      | 0.318        | 2.199         | 13.010      | 12.204         | 4.152        | 5.763        | 11.188        | 16.700      | 20.101       |
| 15            | 296.612            | 0.783         | 10.355     | 0.650        | 2.097         | 14.043      | 14.084         | 5.431        | 5.483        | 15.308        | 18.261      | 23.828       |
| 18            | 263.151            | 0.541         | 13.564     | 0.810        | 2.289         | 17.137      | 15.738         | 6.919        | 5.250        | 19.682        | 20.483      | 28.407       |
| 21            | 199.536            | 0.311         | 7.504      | 0.777        | 1.734         | 10.939      | 19.982         | 4.524        | 4.331        | 15.075        | 19.772      | 24.864       |
| 24            | 149.576            | 0.128         | 7.804      | 1.129        | 1.427         | 7.927       | 18.029         | 3.488        | 3.971        | 12.039        | 18.306      | 21.910       |
| 27            | 127.558            | 0.101         | 2.203      | 0.339        | 0.909         | 3.894       | 13.356         | 2.405        | 3.316        | 7.462         | 12.667      | 14.701       |
| 30            | 102.206            | 0.084         | 1.288      | 0.319        | 0.505         | 2.628       | 12.618         | 1.998        | 2.456        | 6.748         | 11.516      | 13.348       |
| 33            | 49.977             | 0.045         | 1.676      | 0.204        | 0.261         | 1.739       | 7.774          | 1.189        | 1.575        | 4.707         | 6.936       | 8.383        |
| 36            | 19.874             | 0.029         | 0.997      | 0.105        | 0.166         | 1.112       | 3.457          | 0.481        | 0.904        | 2.763         | 2.763       | 3.908        |
| 39            | 8.613              | 0.011         | 0.529      | 0.097        | 0.079         | 0.635       | 1.492          | 0.206        | 0.512        | 1.294         | 1.247       | 1.797        |
| 42            | 2.873              | 0.006         | 0.158      | 0.031        | 0.040         | 0.146       | 0.496          | 0.093        | 0.342        | 0.539         | 0.360       | 0.648        |
| 45            | 2.022              | 0.004         | 0.064      | 0.015        | 0.054         | 0.112       | 0.160          | 0.065        | 0.366        | 0.412         | 0.117       | 0.429        |
| 48            | 1.905              | 0.004         | 0.041      | 0.011        | 0.062         | 0.057       | 0.116          | 0.020        | 0.420        | 0.438         | 0.086       | 0.447        |
| 52            | 1.930              | 0.010         | 0.109      | 0.020        | 0.066         | 0.107       | 0.153          | 0.028        | 0.521        | 0.547         | 0.156       | 0.569        |
| 56            | 1.228              | 0.020         | 0.080      | 0.025        | 0.086         | 0.116       | 0.127          | 0.038        | 0.608        | 0.640         | 0.073       | 0.645        |
| 60            | 0.721              | 0.028         | 0.131      | 0.030        | 0.235         | 0.138       | 0.144          | 0.042        | 1.434        | 1.469         | 0.114       | 1.474        |
| 64            | 0.212              | 0.026         | 0.120      | 0.032        | 0.268         | 0.173       | 0.153          | 0.047        | 1.634        | 1.669         | 0.168       | 1.677        |
| 68            | 0.054              | 0.024         | 0.110      | 0.026        | 0.264         | 0.169       | 0.157          | 0.040        | 1.615        | 1.648         | 0.170       | 1.657        |

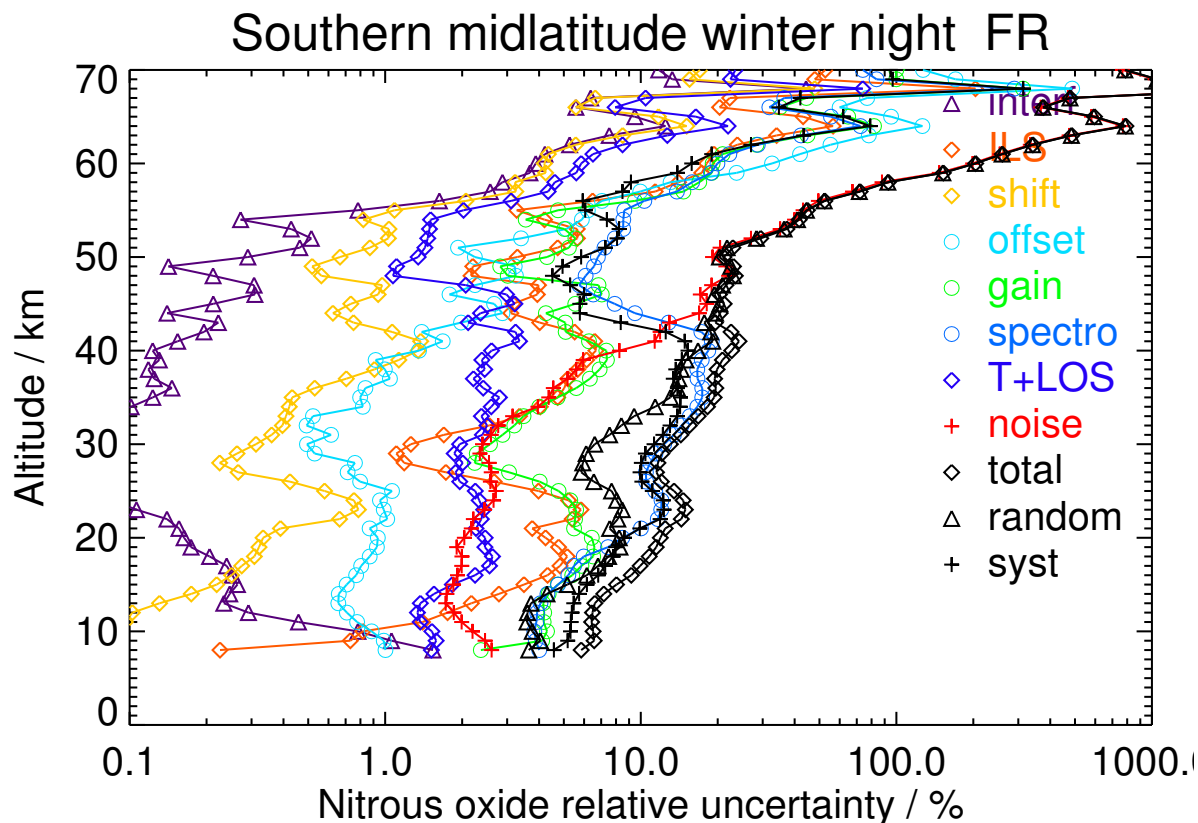

**Figure S156.** V8H\_N2O\_61 Southern midlatitude winter night



**Table S157.** Nitrous oxide error budget for Southern midlatitude spring day. All uncertainties are  $1\sigma$ .

| altitude<br>(km) | mean target<br>(ppbv) | interf<br>(ppbv) | ILS<br>(ppbv) | shift<br>(ppbv) | offset<br>(ppbv) | gain<br>(ppbv) | spectro<br>(ppbv) | T+LOS<br>(ppbv) | noise<br>(ppbv) | random<br>(ppbv) | syst<br>(ppbv) | total<br>(ppbv) |
|------------------|-----------------------|------------------|---------------|-----------------|------------------|----------------|-------------------|-----------------|-----------------|------------------|----------------|-----------------|
| 9                | 288.307               | 3.389            | 1.985         | 0.467           | 2.533            | 6.812          | 13.327            | 3.812           | 7.782           | 11.573           | 13.682         | 17.921          |
| 12               | 302.168               | 1.210            | 5.694         | 0.268           | 2.033            | 13.451         | 13.678            | 4.512           | 5.580           | 13.168           | 16.858         | 21.392          |
| 15               | 280.625               | 1.133            | 10.322        | 0.463           | 2.415            | 16.732         | 16.998            | 6.345           | 6.151           | 21.389           | 17.417         | 27.584          |
| 18               | 259.269               | 0.668            | 22.177        | 1.266           | 3.190            | 25.874         | 18.698            | 9.353           | 5.132           | 32.027           | 24.722         | 40.459          |
| 21               | 182.433               | 0.352            | 12.609        | 1.140           | 2.043            | 15.501         | 21.077            | 5.395           | 4.105           | 22.506           | 19.712         | 29.918          |
| 24               | 140.118               | 0.147            | 10.070        | 1.548           | 1.403            | 9.776          | 17.459            | 3.263           | 3.432           | 15.915           | 16.592         | 22.991          |
| 27               | 133.851               | 0.130            | 4.138         | 0.360           | 0.971            | 5.366          | 15.314            | 2.220           | 2.799           | 11.008           | 13.157         | 17.155          |
| 30               | 100.567               | 0.097            | 1.636         | 0.226           | 0.451            | 2.135          | 12.974            | 1.662           | 2.149           | 6.943            | 11.619         | 13.536          |
| 33               | 42.536                | 0.047            | 1.438         | 0.154           | 0.220            | 0.970          | 6.155             | 1.062           | 1.288           | 3.656            | 5.512          | 6.614           |
| 36               | 20.695                | 0.042            | 0.708         | 0.117           | 0.141            | 0.962          | 2.081             | 0.385           | 0.753           | 1.682            | 1.918          | 2.551           |
| 39               | 13.863                | 0.022            | 0.525         | 0.089           | 0.105            | 0.759          | 1.169             | 0.178           | 0.475           | 1.011            | 1.214          | 1.580           |
| 42               | 10.759                | 0.013            | 0.399         | 0.094           | 0.097            | 0.687          | 0.729             | 0.143           | 0.386           | 0.752            | 0.886          | 1.162           |
| 45               | 7.537                 | 0.017            | 0.253         | 0.082           | 0.117            | 0.736          | 0.576             | 0.141           | 0.393           | 0.803            | 0.698          | 1.064           |
| 48               | 5.020                 | 0.006            | 0.138         | 0.019           | 0.061            | 0.331          | 0.410             | 0.055           | 0.319           | 0.498            | 0.397          | 0.637           |
| 52               | 2.733                 | 0.008            | 0.110         | 0.019           | 0.045            | 0.130          | 0.240             | 0.033           | 0.366           | 0.411            | 0.234          | 0.473           |
| 56               | 1.144                 | 0.008            | 0.049         | 0.018           | 0.055            | 0.063          | 0.126             | 0.033           | 0.411           | 0.430            | 0.104          | 0.442           |
| 60               | 0.705                 | 0.017            | 0.071         | 0.018           | 0.188            | 0.122          | 0.094             | 0.027           | 1.099           | 1.124            | 0.098          | 1.129           |
| 64               | -0.229                | 0.031            | 0.135         | 0.046           | 0.220            | 0.329          | 0.217             | 0.053           | 1.297           | 1.345            | 0.320          | 1.382           |
| 68               | -0.239                | 0.038            | 0.131         | 0.064           | 0.230            | 0.285          | 0.216             | 0.052           | 1.372           | 1.406            | 0.337          | 1.445           |

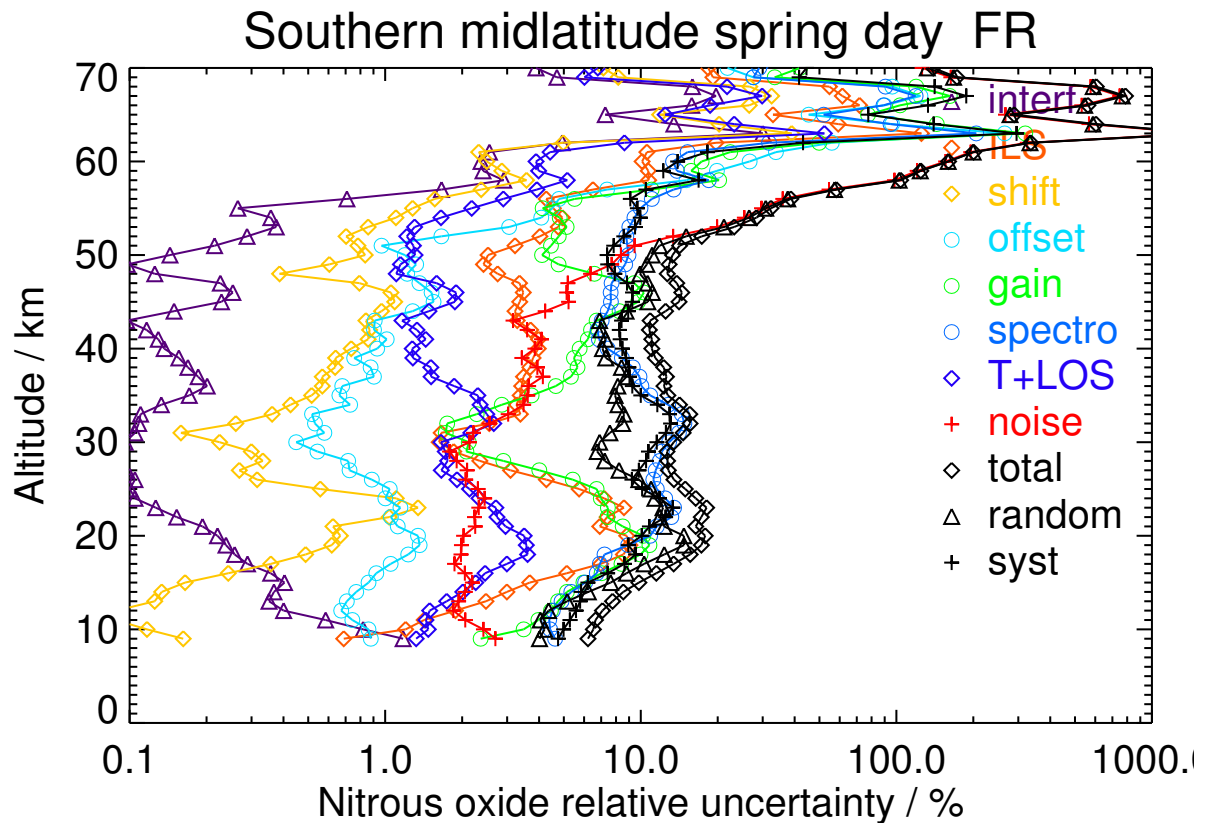**Figure S157.** V8H\_N2O\_61 Southern midlatitude spring day

**Table S158.** Nitrous oxide error budget for Southern midlatitude spring night. All uncertainties are  $1\sigma$ .

| altitude (km) | mean target (ppbv) | interf (ppbv) | ILS (ppbv) | shift (ppbv) | offset (ppbv) | gain (ppbv) | spectro (ppbv) | T+LOS (ppbv) | noise (ppbv) | random (ppbv) | syst (ppbv) | total (ppbv) |
|---------------|--------------------|---------------|------------|--------------|---------------|-------------|----------------|--------------|--------------|---------------|-------------|--------------|
| 9             | 287.350            | 2.678         | 2.682      | 0.553        | 2.658         | 9.125       | 12.787         | 3.852        | 8.167        | 13.808        | 12.625      | 18.709       |
| 12            | 304.079            | 0.768         | 7.740      | 0.434        | 1.993         | 15.801      | 12.644         | 4.118        | 5.223        | 14.532        | 17.529      | 22.769       |
| 15            | 293.887            | 0.726         | 14.337     | 0.778        | 2.647         | 22.852      | 15.701         | 6.892        | 6.144        | 22.734        | 23.470      | 32.675       |
| 18            | 287.332            | 0.389         | 27.748     | 1.952        | 3.231         | 33.079      | 14.099         | 11.621       | 5.143        | 28.752        | 37.579      | 47.316       |
| 21            | 237.493            | 0.392         | 14.035     | 0.859        | 3.184         | 26.878      | 18.306         | 7.481        | 4.238        | 23.422        | 28.122      | 36.599       |
| 24            | 195.372            | 0.216         | 7.758      | 2.028        | 1.867         | 15.414      | 18.724         | 3.538        | 3.667        | 15.333        | 21.140      | 26.115       |
| 27            | 183.470            | 0.123         | 3.276      | 0.673        | 0.902         | 7.002       | 15.988         | 2.446        | 2.984        | 8.500         | 16.103      | 18.209       |
| 30            | 143.229            | 0.102         | 1.815      | 0.348        | 0.474         | 3.801       | 16.234         | 2.088        | 2.363        | 5.383         | 16.205      | 17.076       |
| 33            | 63.517             | 0.045         | 2.320      | 0.196        | 0.286         | 1.172       | 9.612          | 1.582        | 1.519        | 3.988         | 9.389       | 10.201       |
| 36            | 22.389             | 0.046         | 0.913      | 0.101        | 0.135         | 0.675       | 3.007          | 0.620        | 0.878        | 1.939         | 2.786       | 3.394        |
| 39            | 12.973             | 0.021         | 0.457      | 0.110        | 0.104         | 0.691       | 1.052          | 0.227        | 0.539        | 0.875         | 1.180       | 1.469        |
| 42            | 9.566              | 0.010         | 0.346      | 0.107        | 0.115         | 0.743       | 0.683          | 0.168        | 0.458        | 0.741         | 0.923       | 1.184        |
| 45            | 6.496              | 0.015         | 0.234      | 0.075        | 0.110         | 0.679       | 0.523          | 0.133        | 0.401        | 0.742         | 0.660       | 0.993        |
| 48            | 4.299              | 0.008         | 0.137      | 0.042        | 0.066         | 0.413       | 0.333          | 0.068        | 0.315        | 0.497         | 0.405       | 0.641        |
| 52            | 2.516              | 0.005         | 0.071      | 0.017        | 0.039         | 0.099       | 0.185          | 0.030        | 0.347        | 0.370         | 0.189       | 0.415        |
| 56            | 1.422              | 0.005         | 0.054      | 0.015        | 0.058         | 0.056       | 0.116          | 0.028        | 0.425        | 0.439         | 0.111       | 0.453        |
| 60            | 0.360              | 0.013         | 0.062      | 0.015        | 0.181         | 0.154       | 0.082          | 0.029        | 1.012        | 1.040         | 0.106       | 1.045        |
| 64            | -0.416             | 0.022         | 0.056      | 0.029        | 0.219         | 0.275       | 0.124          | 0.044        | 1.241        | 1.278         | 0.228       | 1.298        |
| 68            | -0.549             | 0.025         | 0.082      | 0.040        | 0.230         | 0.261       | 0.135          | 0.050        | 1.340        | 1.372         | 0.253       | 1.395        |

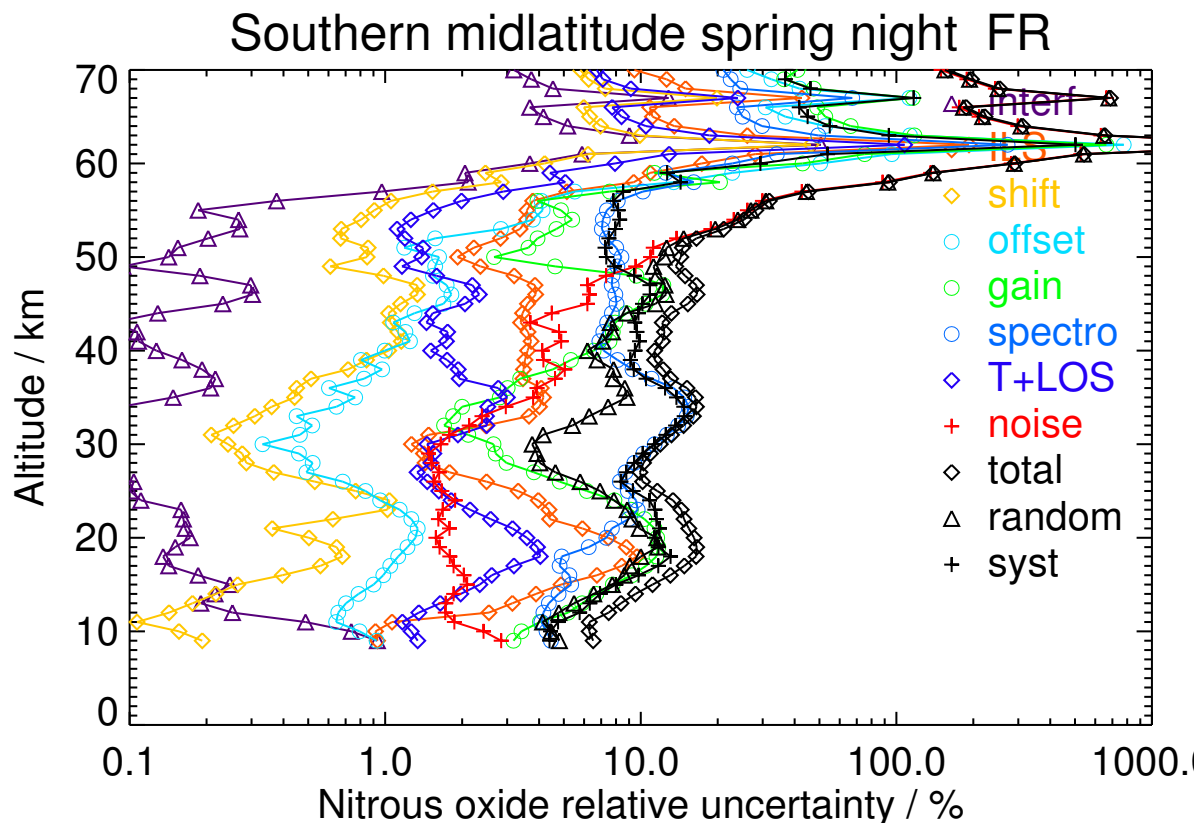

**Figure S158.** V8H\_N2O\_61 Southern midlatitude spring night

**Table S159.** Nitrous oxide error budget for Southern midlatitude summer day. All uncertainties are  $1\sigma$ .

| altitude (km) | mean target (ppbv) | interf (ppbv) | ILS (ppbv) | shift (ppbv) | offset (ppbv) | gain (ppbv) | spectro (ppbv) | T+LOS (ppbv) | noise (ppbv) | random (ppbv) | syst (ppbv) | total (ppbv) |
|---------------|--------------------|---------------|------------|--------------|---------------|-------------|----------------|--------------|--------------|---------------|-------------|--------------|
| 9             | 302.880            | 3.034         | 2.424      | 0.405        | 2.562         | 10.548      | 12.346         | 3.787        | 7.702        | 13.226        | 13.573      | 18.951       |
| 12            | 306.947            | 1.176         | 5.158      | 0.235        | 1.847         | 14.841      | 12.318         | 3.838        | 5.055        | 12.882        | 16.666      | 21.065       |
| 15            | 290.469            | 0.964         | 8.109      | 0.319        | 1.822         | 13.309      | 15.740         | 4.915        | 5.351        | 16.307        | 16.789      | 23.405       |
| 18            | 237.155            | 0.434         | 6.379      | 0.319        | 1.206         | 7.659       | 19.407         | 4.777        | 4.273        | 12.756        | 18.871      | 22.778       |
| 21            | 171.845            | 0.204         | 14.675     | 0.709        | 1.404         | 6.835       | 22.943         | 5.090        | 3.943        | 9.039         | 27.400      | 28.852       |
| 24            | 144.424            | 0.130         | 10.496     | 0.756        | 1.045         | 3.634       | 17.376         | 3.303        | 3.413        | 6.038         | 20.324      | 21.202       |
| 27            | 115.997            | 0.089         | 1.908      | 0.499        | 0.570         | 1.437       | 11.805         | 1.931        | 2.707        | 3.857         | 11.909      | 12.518       |
| 30            | 81.552             | 0.089         | 0.668      | 0.246        | 0.303         | 1.580       | 7.741          | 1.282        | 1.874        | 2.644         | 7.822       | 8.257        |
| 33            | 51.826             | 0.058         | 0.696      | 0.273        | 0.190         | 1.000       | 4.420          | 0.769        | 1.218        | 1.629         | 4.534       | 4.817        |
| 36            | 29.344             | 0.050         | 1.132      | 0.199        | 0.150         | 1.096       | 2.358          | 0.357        | 0.736        | 0.953         | 2.805       | 2.962        |
| 39            | 16.999             | 0.015         | 0.894      | 0.118        | 0.088         | 0.874       | 1.478          | 0.189        | 0.441        | 0.631         | 1.898       | 2.000        |
| 42            | 8.068              | 0.010         | 0.370      | 0.038        | 0.039         | 0.345       | 0.746          | 0.102        | 0.308        | 0.471         | 0.836       | 0.960        |
| 45            | 3.419              | 0.015         | 0.160      | 0.021        | 0.036         | 0.114       | 0.327          | 0.084        | 0.292        | 0.355         | 0.338       | 0.490        |
| 48            | 1.714              | 0.004         | 0.038      | 0.016        | 0.032         | 0.048       | 0.135          | 0.021        | 0.208        | 0.226         | 0.127       | 0.259        |
| 52            | 0.916              | 0.007         | 0.057      | 0.012        | 0.044         | 0.046       | 0.083          | 0.015        | 0.298        | 0.319         | 0.046       | 0.322        |
| 56            | 0.648              | 0.009         | 0.074      | 0.018        | 0.035         | 0.041       | 0.078          | 0.017        | 0.297        | 0.312         | 0.077       | 0.322        |
| 60            | 0.786              | 0.009         | 0.118      | 0.030        | 0.139         | 0.042       | 0.117          | 0.021        | 0.871        | 0.885         | 0.157       | 0.899        |
| 64            | -0.428             | 0.034         | 0.146      | 0.056        | 0.146         | 0.236       | 0.286          | 0.039        | 0.958        | 0.980         | 0.377       | 1.050        |
| 68            | -0.954             | 0.051         | 0.246      | 0.095        | 0.232         | 0.355       | 0.460          | 0.055        | 1.373        | 1.407         | 0.610       | 1.533        |

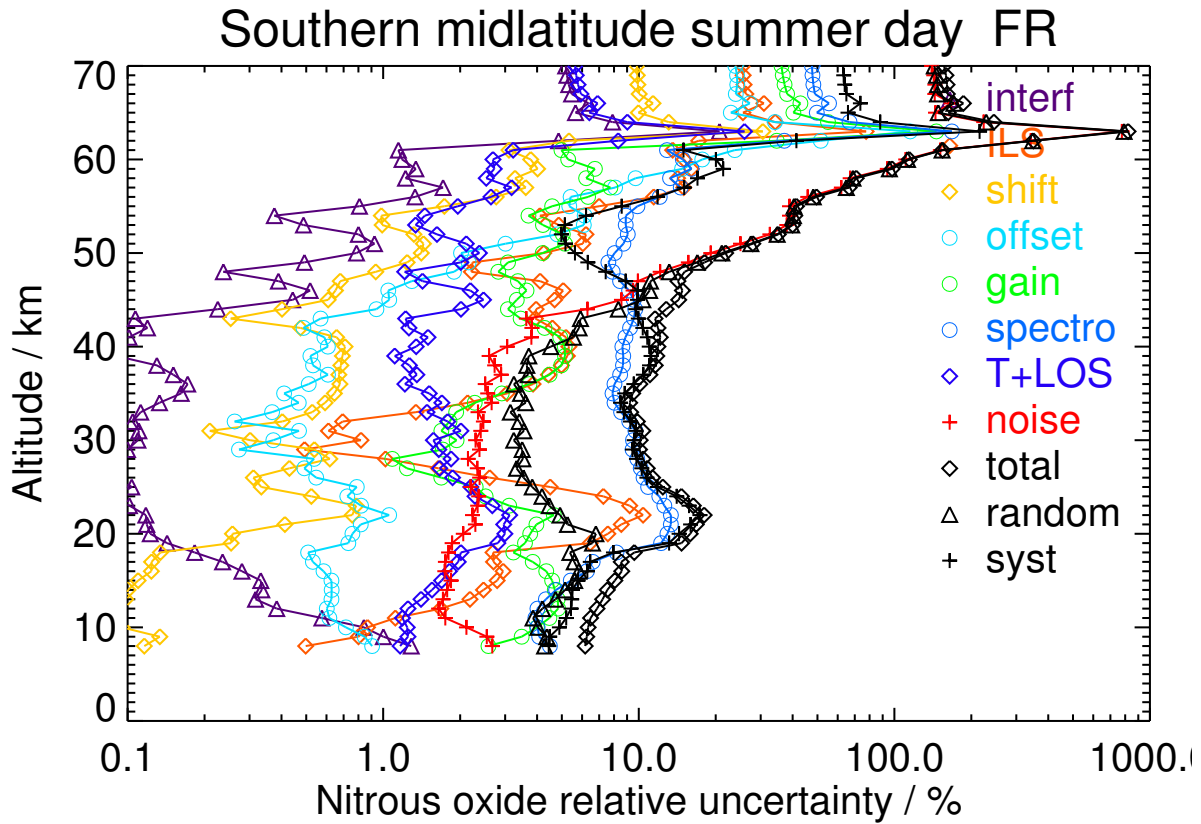

**Figure S159.** V8H\_N2O\_61 Southern midlatitude summer day

**Table S160.** Nitrous oxide error budget for Southern midlatitude summer night. All uncertainties are  $1\sigma$ .

| altitude (km) | mean target (ppbv) | interf (ppbv) | ILS (ppbv) | shift (ppbv) | offset (ppbv) | gain (ppbv) | spectro (ppbv) | T+LOS (ppbv) | noise (ppbv) | random (ppbv) | syst (ppbv) | total (ppbv) |
|---------------|--------------------|---------------|------------|--------------|---------------|-------------|----------------|--------------|--------------|---------------|-------------|--------------|
| 9             | 304.454            | 3.253         | 4.184      | 0.281        | 3.091         | 18.564      | 14.450         | 4.662        | 7.390        | 16.870        | 19.568      | 25.836       |
| 12            | 315.691            | 1.165         | 9.589      | 0.331        | 2.642         | 17.803      | 13.967         | 5.319        | 6.330        | 13.577        | 22.281      | 26.092       |
| 15            | 317.927            | 1.068         | 17.073     | 0.527        | 2.814         | 22.501      | 15.636         | 6.995        | 6.511        | 17.167        | 29.124      | 33.807       |
| 18            | 271.123            | 0.583         | 18.317     | 0.590        | 2.572         | 21.603      | 19.123         | 6.844        | 4.829        | 23.796        | 26.060      | 35.289       |
| 21            | 192.761            | 0.298         | 11.626     | 0.918        | 1.386         | 7.877       | 23.177         | 4.008        | 3.817        | 13.350        | 24.283      | 27.711       |
| 24            | 138.123            | 0.127         | 8.884      | 0.683        | 1.078         | 3.870       | 15.811         | 3.079        | 3.379        | 6.787         | 17.898      | 19.142       |
| 27            | 119.231            | 0.101         | 2.231      | 0.641        | 0.644         | 1.624       | 11.859         | 1.985        | 2.762        | 4.251         | 11.941      | 12.675       |
| 30            | 82.018             | 0.091         | 0.621      | 0.242        | 0.333         | 1.726       | 8.135          | 1.379        | 1.952        | 2.730         | 8.245       | 8.685        |
| 33            | 53.445             | 0.060         | 0.727      | 0.308        | 0.219         | 1.287       | 4.561          | 0.817        | 1.283        | 1.718         | 4.742       | 5.044        |
| 36            | 30.218             | 0.054         | 1.106      | 0.192        | 0.155         | 1.108       | 2.490          | 0.396        | 0.792        | 1.040         | 2.901       | 3.082        |
| 39            | 17.712             | 0.019         | 0.935      | 0.118        | 0.089         | 0.840       | 1.517          | 0.204        | 0.468        | 0.660         | 1.931       | 2.040        |
| 42            | 8.095              | 0.013         | 0.416      | 0.038        | 0.045         | 0.355       | 0.805          | 0.111        | 0.329        | 0.479         | 0.918       | 1.035        |
| 45            | 3.128              | 0.013         | 0.154      | 0.023        | 0.037         | 0.106       | 0.322          | 0.085        | 0.290        | 0.364         | 0.315       | 0.482        |
| 48            | 1.562              | 0.004         | 0.034      | 0.015        | 0.030         | 0.033       | 0.108          | 0.020        | 0.199        | 0.210         | 0.103       | 0.234        |
| 52            | 0.924              | 0.006         | 0.050      | 0.011        | 0.041         | 0.043       | 0.066          | 0.013        | 0.279        | 0.289         | 0.071       | 0.298        |
| 56            | 0.260              | 0.010         | 0.039      | 0.012        | 0.033         | 0.036       | 0.055          | 0.014        | 0.296        | 0.306         | 0.038       | 0.308        |
| 60            | 0.528              | 0.008         | 0.075      | 0.028        | 0.129         | 0.054       | 0.102          | 0.014        | 0.804        | 0.818         | 0.119       | 0.827        |
| 64            | -0.698             | 0.032         | 0.154      | 0.055        | 0.140         | 0.192       | 0.279          | 0.032        | 0.912        | 0.936         | 0.344       | 0.997        |
| 68            | -1.294             | 0.047         | 0.233      | 0.092        | 0.238         | 0.303       | 0.441          | 0.049        | 1.422        | 1.456         | 0.559       | 1.560        |

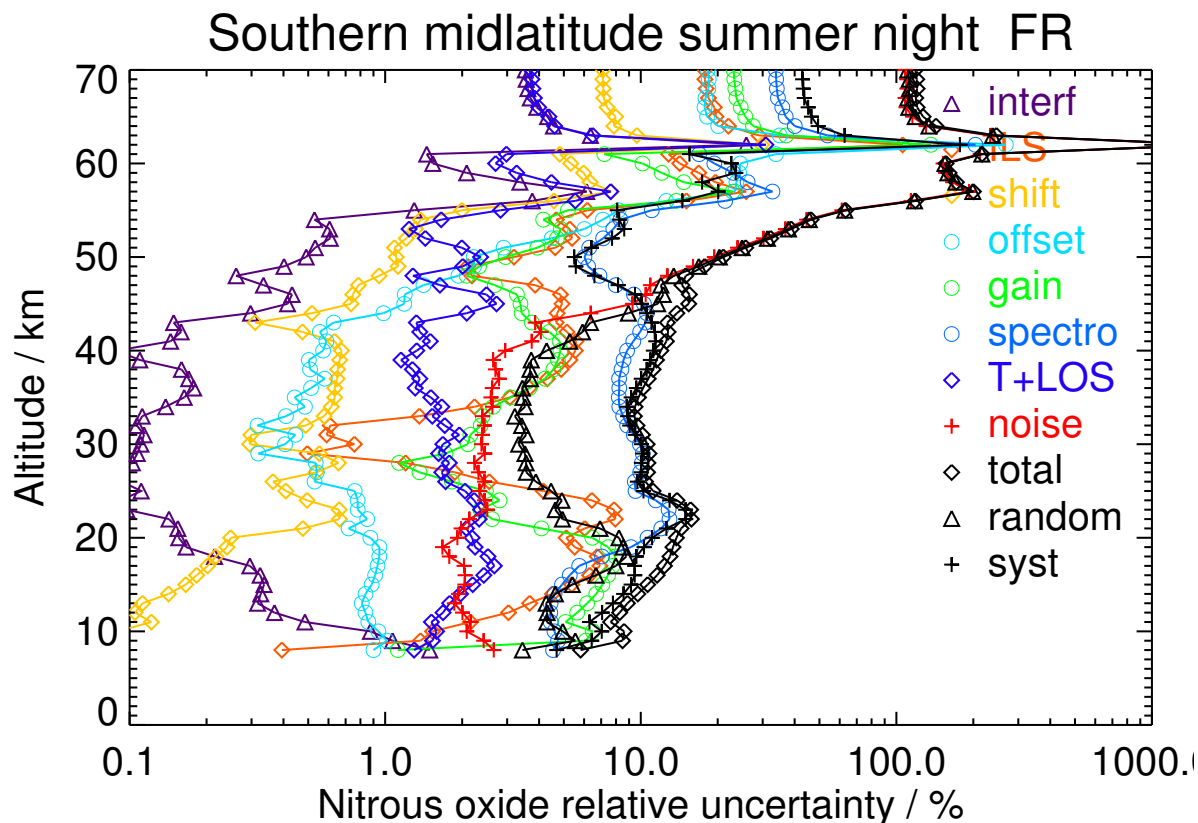

**Figure S160.** V8H\_N2O\_61 Southern midlatitude summer night

**Table S161.** Nitrous oxide error budget for Southern midlatitude autumn day. All uncertainties are  $1\sigma$ .

| altitude<br>(km) | mean target<br>(ppbv) | interf<br>(ppbv) | ILS<br>(ppbv) | shift<br>(ppbv) | offset<br>(ppbv) | gain<br>(ppbv) | spectro<br>(ppbv) | T+LOS<br>(ppbv) | noise<br>(ppbv) | random<br>(ppbv) | syst<br>(ppbv) | total<br>(ppbv) |
|------------------|-----------------------|------------------|---------------|-----------------|------------------|----------------|-------------------|-----------------|-----------------|------------------|----------------|-----------------|
| 12               | 314.527               | 0.863            | 5.447         | 0.324           | 2.188            | 13.274         | 12.590            | 3.960           | 5.604           | 10.323           | 17.622         | 20.423          |
| 15               | 303.224               | 0.685            | 9.620         | 0.506           | 2.256            | 15.580         | 14.508            | 5.458           | 5.767           | 14.359           | 20.210         | 24.792          |
| 18               | 263.133               | 0.265            | 9.092         | 0.604           | 2.830            | 20.515         | 19.083            | 4.988           | 4.467           | 18.207           | 24.279         | 30.348          |
| 21               | 192.936               | 0.282            | 8.422         | 1.510           | 2.204            | 13.414         | 22.398            | 3.892           | 3.601           | 15.169           | 23.617         | 28.069          |
| 24               | 144.939               | 0.149            | 4.107         | 0.445           | 1.465            | 7.249          | 15.858            | 2.862           | 3.247           | 9.842            | 15.656         | 18.493          |
| 27               | 108.978               | 0.109            | 1.255         | 0.489           | 0.810            | 2.076          | 12.214            | 1.993           | 2.730           | 5.193            | 11.850         | 12.938          |
| 30               | 72.283                | 0.056            | 1.138         | 0.204           | 0.453            | 1.603          | 8.743             | 1.579           | 2.009           | 3.648            | 8.589          | 9.332           |
| 33               | 44.399                | 0.041            | 1.221         | 0.234           | 0.367            | 1.877          | 5.171             | 0.849           | 1.442           | 2.931            | 5.115          | 5.895           |
| 36               | 24.109                | 0.032            | 0.939         | 0.129           | 0.235            | 1.495          | 3.431             | 0.432           | 0.994           | 2.548            | 3.105          | 4.017           |
| 39               | 15.114                | 0.023            | 0.620         | 0.134           | 0.189            | 1.158          | 1.556             | 0.230           | 0.699           | 1.557            | 1.522          | 2.177           |
| 42               | 10.473                | 0.008            | 0.551         | 0.069           | 0.123            | 0.837          | 1.127             | 0.130           | 0.463           | 1.176            | 1.069          | 1.589           |
| 45               | 6.323                 | 0.010            | 0.369         | 0.031           | 0.066            | 0.507          | 0.710             | 0.095           | 0.372           | 0.753            | 0.695          | 1.025           |
| 48               | 3.481                 | 0.005            | 0.105         | 0.034           | 0.055            | 0.158          | 0.358             | 0.054           | 0.380           | 0.484            | 0.285          | 0.562           |
| 52               | 2.545                 | 0.003            | 0.086         | 0.013           | 0.080            | 0.092          | 0.178             | 0.028           | 0.550           | 0.571            | 0.177          | 0.598           |
| 56               | 1.599                 | 0.012            | 0.072         | 0.026           | 0.081            | 0.181          | 0.113             | 0.042           | 0.652           | 0.690            | 0.094          | 0.696           |
| 60               | 1.184                 | 0.008            | 0.035         | 0.010           | 0.190            | 0.043          | 0.076             | 0.023           | 1.335           | 1.350            | 0.061          | 1.352           |
| 64               | 0.702                 | 0.015            | 0.070         | 0.021           | 0.224            | 0.137          | 0.121             | 0.030           | 1.438           | 1.464            | 0.124          | 1.469           |
| 68               | 0.466                 | 0.018            | 0.080         | 0.027           | 0.283            | 0.209          | 0.141             | 0.036           | 1.670           | 1.703            | 0.202          | 1.715           |

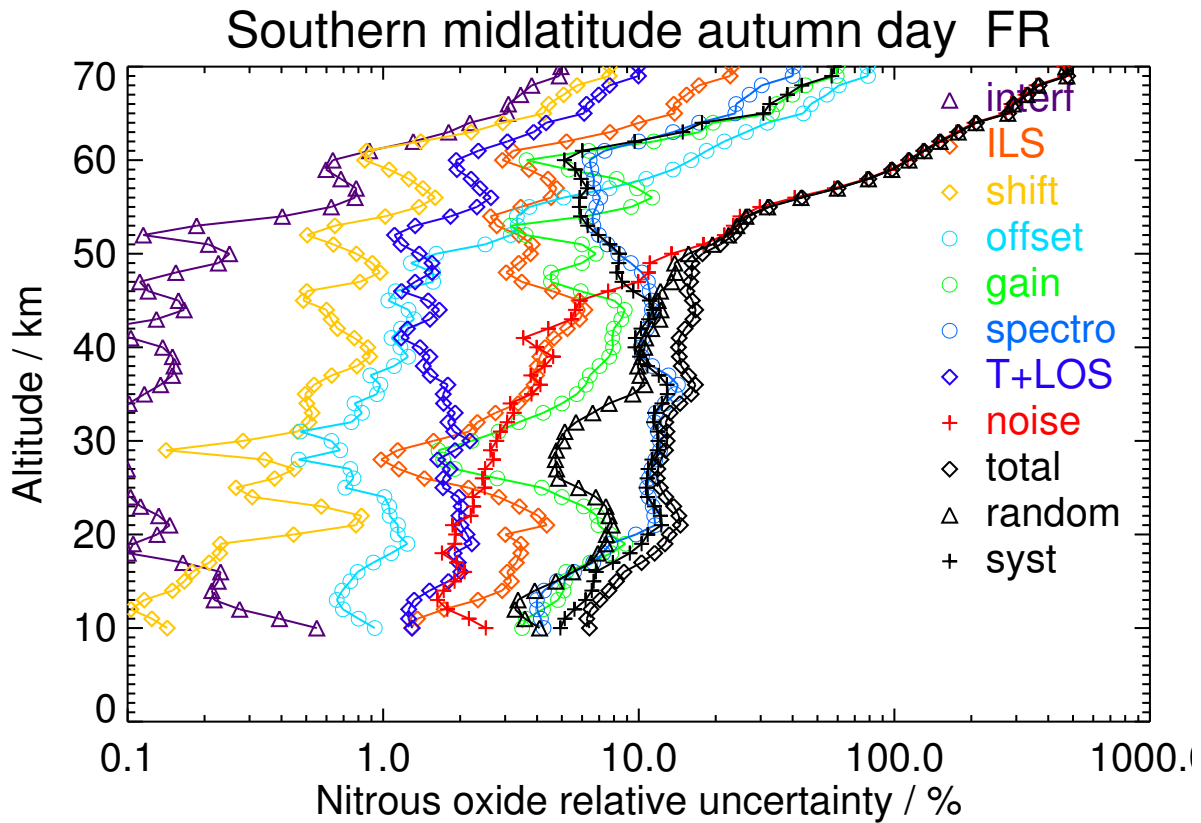

**Figure S161.** V8H\_N2O\_61 Southern midlatitude autumn day

**Table S162.** Nitrous oxide error budget for Southern midlatitude autumn night. All uncertainties are  $1\sigma$ .

| altitude (km) | mean target (ppbv) | interf (ppbv) | ILS (ppbv) | shift (ppbv) | offset (ppbv) | gain (ppbv) | spectro (ppbv) | T+LOS (ppbv) | noise (ppbv) | random (ppbv) | syst (ppbv) | total (ppbv) |
|---------------|--------------------|---------------|------------|--------------|---------------|-------------|----------------|--------------|--------------|---------------|-------------|--------------|
| 12            | 323.693            | 0.999         | 7.442      | 0.285        | 2.500         | 16.506      | 13.111         | 4.264        | 5.747        | 10.771        | 21.029      | 23.627       |
| 15            | 319.088            | 0.935         | 10.023     | 0.417        | 2.522         | 16.897      | 14.259         | 5.617        | 5.826        | 11.536        | 23.003      | 25.734       |
| 18            | 281.480            | 0.489         | 7.421      | 0.527        | 3.091         | 22.159      | 18.810         | 4.857        | 4.383        | 13.708        | 27.657      | 30.868       |
| 21            | 197.515            | 0.289         | 9.648      | 1.654        | 2.256         | 13.059      | 24.844         | 4.184        | 3.787        | 15.198        | 26.261      | 30.341       |
| 24            | 151.670            | 0.142         | 3.341      | 0.279        | 1.373         | 4.938       | 16.357         | 2.988        | 3.338        | 8.006         | 16.157      | 18.032       |
| 27            | 113.607            | 0.116         | 1.250      | 0.599        | 0.797         | 1.863       | 12.260         | 2.145        | 2.776        | 4.585         | 12.151      | 12.987       |
| 30            | 74.630             | 0.065         | 0.891      | 0.215        | 0.454         | 1.666       | 8.547          | 1.671        | 2.049        | 3.939         | 8.267       | 9.158        |
| 33            | 44.985             | 0.053         | 0.903      | 0.259        | 0.348         | 1.552       | 4.327          | 0.865        | 1.491        | 2.597         | 4.286       | 5.011        |
| 36            | 30.474             | 0.043         | 0.938      | 0.158        | 0.269         | 1.577       | 2.996          | 0.432        | 1.049        | 2.225         | 2.962       | 3.705        |
| 39            | 19.985             | 0.031         | 0.908      | 0.165        | 0.187         | 1.201       | 1.792          | 0.252        | 0.717        | 1.657         | 1.836       | 2.473        |
| 42            | 12.517             | 0.014         | 0.718      | 0.089        | 0.125         | 0.881       | 1.248          | 0.136        | 0.451        | 1.278         | 1.209       | 1.759        |
| 45            | 8.013              | 0.016         | 0.444      | 0.028        | 0.071         | 0.547       | 0.818          | 0.107        | 0.389        | 0.846         | 0.787       | 1.155        |
| 48            | 4.243              | 0.008         | 0.132      | 0.054        | 0.059         | 0.164       | 0.452          | 0.055        | 0.383        | 0.524         | 0.361       | 0.636        |
| 52            | 2.737              | 0.004         | 0.107      | 0.015        | 0.078         | 0.079       | 0.214          | 0.030        | 0.527        | 0.551         | 0.210       | 0.590        |
| 56            | 1.558              | 0.014         | 0.084      | 0.024        | 0.068         | 0.100       | 0.143          | 0.040        | 0.586        | 0.615         | 0.095       | 0.622        |
| 60            | 1.233              | 0.009         | 0.053      | 0.011        | 0.180         | 0.039       | 0.096          | 0.026        | 1.257        | 1.274         | 0.073       | 1.276        |
| 64            | 0.207              | 0.018         | 0.069      | 0.024        | 0.204         | 0.155       | 0.175          | 0.038        | 1.328        | 1.356         | 0.171       | 1.367        |
| 68            | -0.297             | 0.025         | 0.096      | 0.041        | 0.272         | 0.268       | 0.252          | 0.052        | 1.622        | 1.666         | 0.284       | 1.690        |

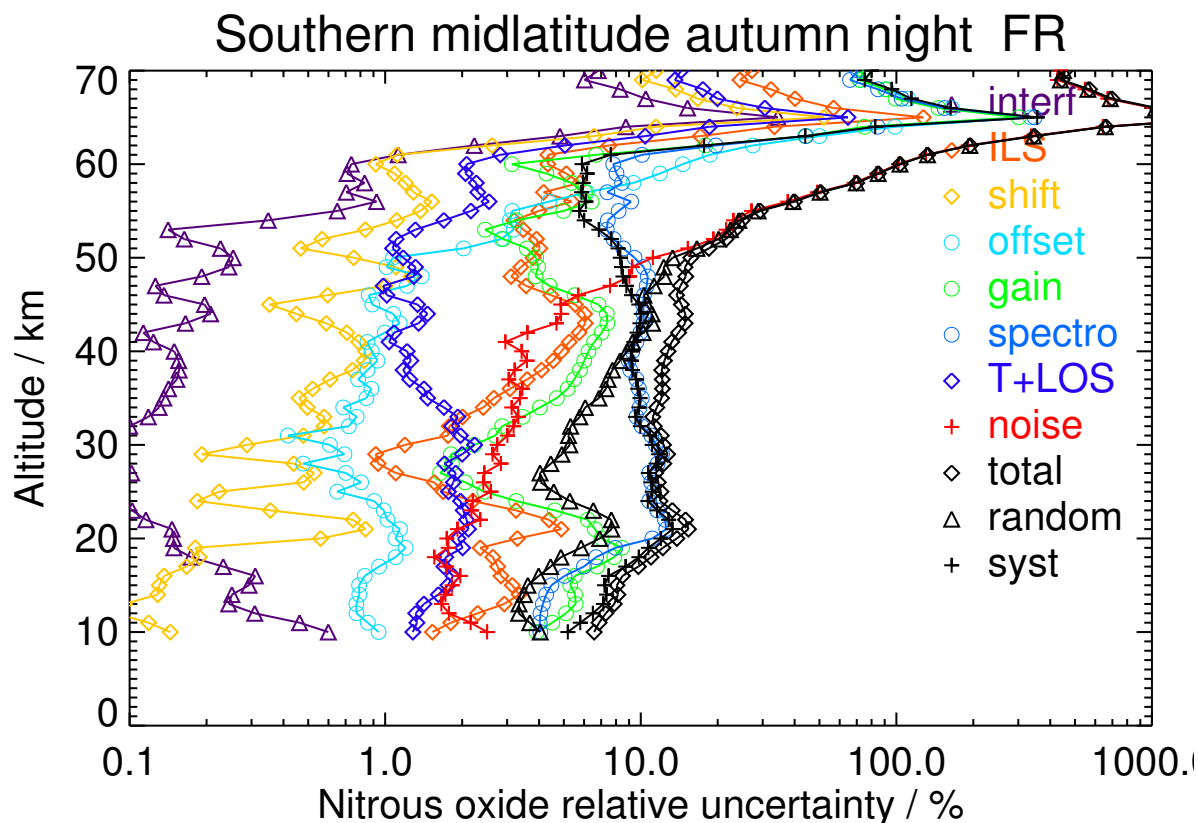

**Figure S162.** V8H\_N2O\_61 Southern midlatitude autumn night



**Table S163.** Nitrous oxide error budget for Southern polar winter day. All uncertainties are  $1\sigma$ .

| altitude (km) | mean target (ppbv) | interf (ppbv) | ILS (ppbv) | shift (ppbv) | offset (ppbv) | gain (ppbv) | spectro (ppbv) | T+LOS (ppbv) | noise (ppbv) | random (ppbv) | syst (ppbv) | total (ppbv) |
|---------------|--------------------|---------------|------------|--------------|---------------|-------------|----------------|--------------|--------------|---------------|-------------|--------------|
| 9             | 319.250            | 2.198         | 1.371      | 0.324        | 4.161         | 12.202      | 13.473         | 6.961        | 9.816        | 13.959        | 17.450      | 22.346       |
| 12            | 287.849            | 1.862         | 1.981      | 0.465        | 3.697         | 10.966      | 12.502         | 7.439        | 9.774        | 14.544        | 15.400      | 21.182       |
| 15            | 228.073            | 2.115         | 2.050      | 0.543        | 2.983         | 8.726       | 12.347         | 7.475        | 8.504        | 13.266        | 14.095      | 19.356       |
| 18            | 144.134            | 1.280         | 2.718      | 0.725        | 2.002         | 6.659       | 15.603         | 6.012        | 5.646        | 10.475        | 16.114      | 19.219       |
| 21            | 83.476             | 0.333         | 1.491      | 0.816        | 1.227         | 4.504       | 15.267         | 3.108        | 4.696        | 7.761         | 15.144      | 17.017       |
| 24            | 28.290             | 0.089         | 1.280      | 0.233        | 0.545         | 1.180       | 7.832          | 1.412        | 3.542        | 5.752         | 6.797       | 8.904        |
| 27            | 11.978             | 0.058         | 0.506      | 0.149        | 0.403         | 0.465       | 1.900          | 0.629        | 2.167        | 2.786         | 1.264       | 3.060        |
| 30            | 10.261             | 0.055         | 0.383      | 0.104        | 0.271         | 0.405       | 1.525          | 0.381        | 1.488        | 1.889         | 1.232       | 2.255        |
| 33            | 4.376              | 0.029         | 0.268      | 0.070        | 0.147         | 0.366       | 0.736          | 0.181        | 0.843        | 1.025         | 0.682       | 1.232        |
| 36            | 1.560              | 0.008         | 0.132      | 0.053        | 0.086         | 0.284       | 0.253          | 0.066        | 0.426        | 0.563         | 0.204       | 0.598        |
| 39            | 0.814              | 0.003         | 0.033      | 0.012        | 0.040         | 0.049       | 0.059          | 0.021        | 0.288        | 0.300         | 0.045       | 0.303        |
| 42            | 0.834              | 0.003         | 0.018      | 0.007        | 0.028         | 0.030       | 0.053          | 0.014        | 0.232        | 0.239         | 0.038       | 0.242        |
| 45            | 1.206              | 0.004         | 0.030      | 0.011        | 0.039         | 0.042       | 0.068          | 0.018        | 0.294        | 0.304         | 0.053       | 0.309        |
| 48            | 1.068              | 0.003         | 0.023      | 0.005        | 0.058         | 0.018       | 0.059          | 0.009        | 0.395        | 0.402         | 0.052       | 0.405        |
| 52            | 1.130              | 0.004         | 0.043      | 0.015        | 0.065         | 0.022       | 0.055          | 0.012        | 0.507        | 0.513         | 0.062       | 0.516        |
| 56            | 0.968              | 0.005         | 0.025      | 0.015        | 0.074         | 0.038       | 0.062          | 0.017        | 0.555        | 0.563         | 0.054       | 0.566        |
| 60            | 0.945              | 0.008         | 0.038      | 0.013        | 0.219         | 0.033       | 0.061          | 0.023        | 1.378        | 1.397         | 0.051       | 1.398        |
| 64            | 0.809              | 0.010         | 0.044      | 0.017        | 0.254         | 0.027       | 0.067          | 0.026        | 1.571        | 1.594         | 0.049       | 1.594        |
| 68            | 0.353              | 0.009         | 0.030      | 0.013        | 0.254         | 0.024       | 0.046          | 0.023        | 1.544        | 1.565         | 0.034       | 1.566        |

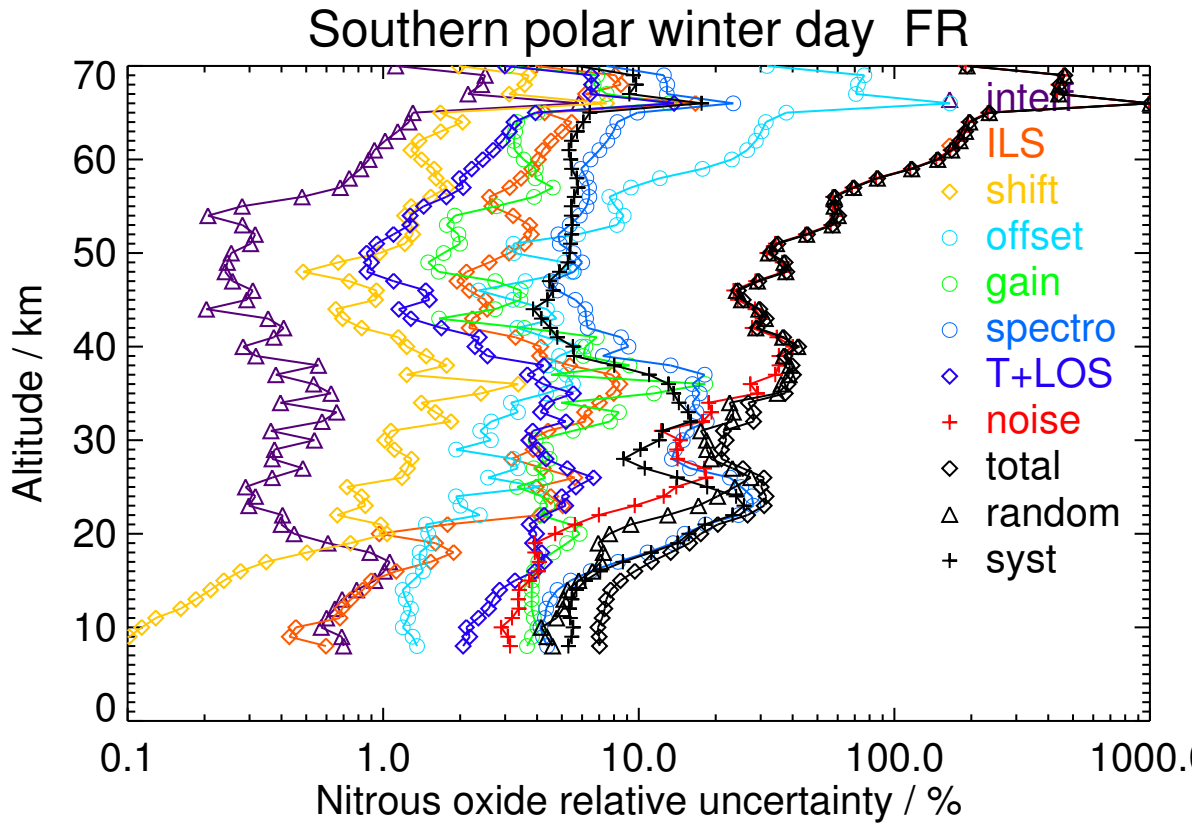

**Figure S163.** V8H\_N2O\_61 Southern polar winter day

**Table S164.** Nitrous oxide error budget for Southern polar winter night. All uncertainties are  $1\sigma$ .

| altitude (km) | mean target (ppbv) | interf (ppbv) | ILS (ppbv) | shift (ppbv) | offset (ppbv) | gain (ppbv) | spectro (ppbv) | T+LOS (ppbv) | noise (ppbv) | random (ppbv) | syst (ppbv) | total (ppbv) |
|---------------|--------------------|---------------|------------|--------------|---------------|-------------|----------------|--------------|--------------|---------------|-------------|--------------|
| 9             | 312.334            | 2.047         | 1.507      | 0.207        | 3.625         | 10.391      | 11.287         | 5.654        | 8.422        | 12.410        | 14.279      | 18.918       |
| 12            | 288.842            | 1.540         | 2.978      | 0.254        | 2.887         | 9.574       | 11.011         | 5.637        | 7.575        | 11.930        | 13.393      | 17.936       |
| 15            | 228.767            | 1.690         | 3.293      | 0.362        | 2.611         | 7.361       | 9.704          | 6.324        | 7.348        | 12.105        | 10.792      | 16.217       |
| 18            | 153.031            | 0.999         | 2.469      | 0.492        | 1.796         | 5.385       | 11.872         | 4.820        | 5.052        | 9.456         | 11.825      | 15.141       |
| 21            | 95.611             | 0.284         | 1.410      | 0.828        | 1.402         | 4.377       | 11.101         | 3.000        | 4.610        | 6.925         | 11.376      | 13.318       |
| 24            | 43.602             | 0.102         | 1.774      | 0.360        | 0.773         | 1.906       | 8.668          | 1.788        | 3.862        | 5.432         | 8.441       | 10.038       |
| 27            | 14.020             | 0.054         | 0.921      | 0.196        | 0.428         | 0.812       | 3.734          | 0.903        | 2.381        | 3.486         | 3.164       | 4.708        |
| 30            | 7.093              | 0.046         | 0.368      | 0.118        | 0.253         | 0.552       | 1.201          | 0.398        | 1.433        | 1.947         | 0.620       | 2.043        |
| 33            | 6.042              | 0.030         | 0.301      | 0.092        | 0.175         | 0.440       | 0.918          | 0.229        | 0.972        | 1.233         | 0.803       | 1.472        |
| 36            | 2.611              | 0.010         | 0.166      | 0.038        | 0.084         | 0.215       | 0.413          | 0.095        | 0.542        | 0.655         | 0.355       | 0.745        |
| 39            | 1.196              | 0.003         | 0.073      | 0.018        | 0.042         | 0.070       | 0.164          | 0.039        | 0.347        | 0.385         | 0.115       | 0.402        |
| 42            | 0.680              | 0.003         | 0.034      | 0.014        | 0.034         | 0.070       | 0.094          | 0.034        | 0.275        | 0.292         | 0.088       | 0.305        |
| 45            | 0.845              | 0.003         | 0.035      | 0.018        | 0.052         | 0.104       | 0.094          | 0.038        | 0.342        | 0.367         | 0.085       | 0.377        |
| 48            | 0.627              | 0.002         | 0.025      | 0.007        | 0.063         | 0.025       | 0.053          | 0.012        | 0.439        | 0.447         | 0.040       | 0.449        |
| 52            | 0.960              | 0.003         | 0.032      | 0.015        | 0.061         | 0.047       | 0.048          | 0.018        | 0.500        | 0.507         | 0.053       | 0.510        |
| 56            | 1.109              | 0.003         | 0.022      | 0.013        | 0.076         | 0.057       | 0.061          | 0.020        | 0.567        | 0.575         | 0.064       | 0.579        |
| 60            | 1.189              | 0.007         | 0.026      | 0.012        | 0.213         | 0.053       | 0.070          | 0.027        | 1.332        | 1.351         | 0.071       | 1.353        |
| 64            | 0.796              | 0.008         | 0.032      | 0.010        | 0.258         | 0.031       | 0.078          | 0.029        | 1.565        | 1.587         | 0.067       | 1.589        |
| 68            | 0.810              | 0.006         | 0.015      | 0.007        | 0.262         | 0.025       | 0.073          | 0.023        | 1.575        | 1.598         | 0.064       | 1.599        |

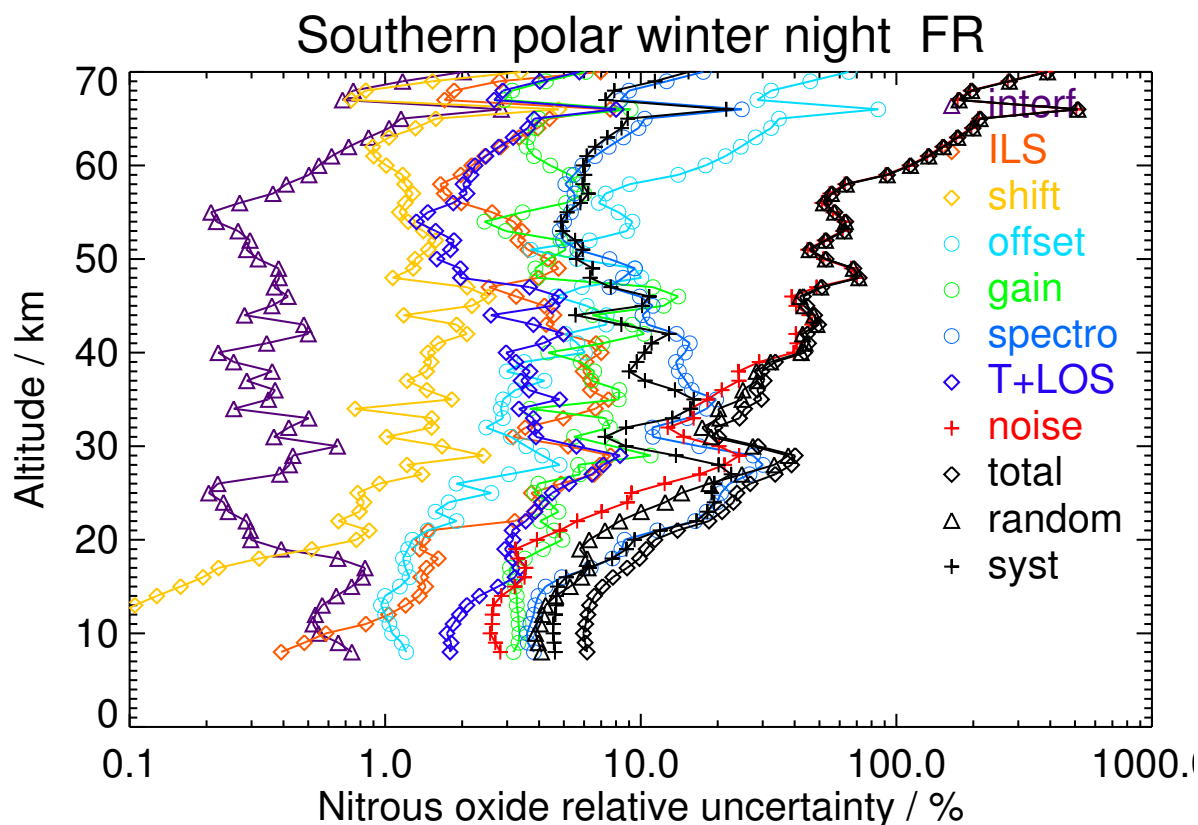

**Figure S164.** V8H\_N2O\_61 Southern polar winter night



**Table S165.** Nitrous oxide error budget for Southern polar spring day. All uncertainties are  $1\sigma$ .

| altitude (km) | mean target (ppbv) | interf (ppbv) | ILS (ppbv) | shift (ppbv) | offset (ppbv) | gain (ppbv) | spectro (ppbv) | T+LOS (ppbv) | noise (ppbv) | random (ppbv) | syst (ppbv) | total (ppbv) |
|---------------|--------------------|---------------|------------|--------------|---------------|-------------|----------------|--------------|--------------|---------------|-------------|--------------|
| 9             | 308.136            | 3.694         | 5.068      | 0.552        | 3.826         | 10.250      | 11.171         | 7.330        | 10.685       | 15.089        | 14.979      | 21.261       |
| 12            | 286.765            | 2.329         | 6.498      | 0.813        | 2.856         | 9.068       | 10.935         | 7.566        | 8.752        | 13.382        | 14.596      | 19.802       |
| 15            | 201.366            | 1.533         | 5.279      | 0.862        | 1.911         | 4.875       | 16.201         | 6.967        | 7.111        | 12.320        | 16.376      | 20.493       |
| 18            | 94.035             | 0.346         | 3.997      | 0.763        | 0.948         | 2.552       | 15.824         | 6.186        | 4.136        | 8.779         | 15.900      | 18.162       |
| 21            | 12.184             | 0.083         | 2.075      | 0.261        | 0.393         | 0.699       | 4.154          | 1.343        | 2.930        | 4.962         | 2.837       | 5.716        |
| 24            | 10.932             | 0.116         | 2.160      | 0.171        | 0.312         | 1.131       | 3.238          | 0.680        | 2.438        | 4.005         | 2.633       | 4.793        |
| 27            | 18.878             | 0.130         | 1.642      | 0.186        | 0.353         | 0.909       | 3.278          | 0.496        | 2.208        | 4.268         | 1.163       | 4.424        |
| 30            | 22.906             | 0.085         | 1.357      | 0.134        | 0.255         | 1.975       | 3.565          | 0.371        | 1.687        | 4.186         | 2.000       | 4.640        |
| 33            | 16.204             | 0.034         | 0.542      | 0.091        | 0.141         | 0.534       | 1.747          | 0.225        | 0.940        | 1.763         | 1.219       | 2.144        |
| 36            | 11.243             | 0.020         | 0.406      | 0.071        | 0.072         | 0.453       | 0.669          | 0.123        | 0.521        | 0.771         | 0.721       | 1.055        |
| 39            | 9.817              | 0.013         | 0.342      | 0.056        | 0.049         | 0.445       | 0.521          | 0.079        | 0.327        | 0.548         | 0.636       | 0.840        |
| 42            | 7.056              | 0.008         | 0.308      | 0.034        | 0.037         | 0.307       | 0.443          | 0.066        | 0.275        | 0.498         | 0.469       | 0.684        |
| 45            | 5.147              | 0.008         | 0.233      | 0.025        | 0.036         | 0.249       | 0.345          | 0.047        | 0.242        | 0.403         | 0.368       | 0.546        |
| 48            | 3.439              | 0.010         | 0.180      | 0.020        | 0.033         | 0.170       | 0.235          | 0.029        | 0.232        | 0.344         | 0.232       | 0.415        |
| 52            | 2.212              | 0.009         | 0.133      | 0.024        | 0.031         | 0.112       | 0.149          | 0.021        | 0.262        | 0.303         | 0.176       | 0.351        |
| 56            | 1.146              | 0.007         | 0.063      | 0.014        | 0.053         | 0.056       | 0.107          | 0.022        | 0.362        | 0.379         | 0.096       | 0.391        |
| 60            | 0.336              | 0.027         | 0.181      | 0.039        | 0.149         | 0.163       | 0.146          | 0.024        | 0.822        | 0.873         | 0.140       | 0.884        |
| 64            | -0.540             | 0.037         | 0.411      | 0.065        | 0.202         | 0.333       | 0.319          | 0.041        | 1.131        | 1.192         | 0.537       | 1.307        |
| 68            | -2.279             | 0.065         | 0.926      | 0.137        | 0.211         | 0.748       | 0.729          | 0.082        | 1.208        | 1.443         | 1.183       | 1.866        |

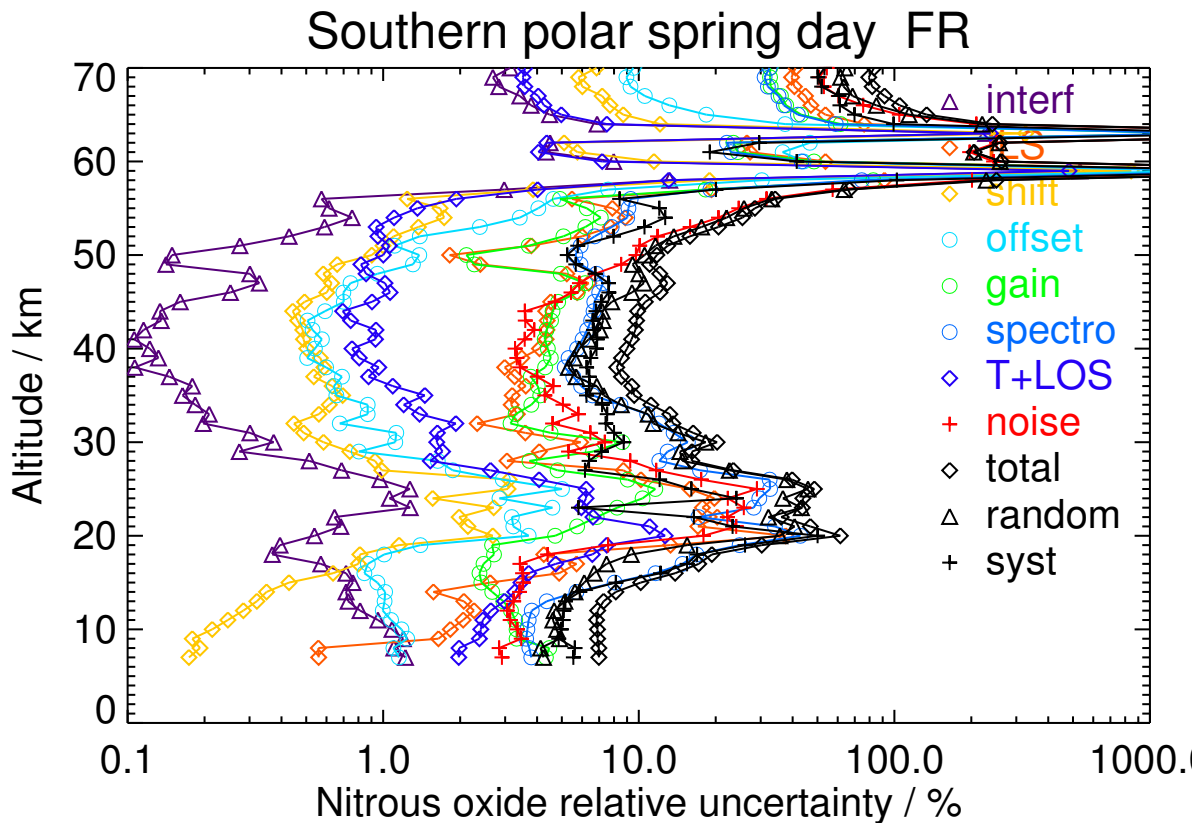

**Figure S165.** V8H\_N2O\_61 Southern polar spring day

**Table S166.** Nitrous oxide error budget for Southern polar spring night. All uncertainties are  $1\sigma$ .

| altitude (km) | mean target (ppbv) | interf (ppbv) | ILS (ppbv) | shift (ppbv) | offset (ppbv) | gain (ppbv) | spectro (ppbv) | T+LOS (ppbv) | noise (ppbv) | random (ppbv) | syst (ppbv) | total (ppbv) |
|---------------|--------------------|---------------|------------|--------------|---------------|-------------|----------------|--------------|--------------|---------------|-------------|--------------|
| 9             | 310.302            | 2.695         | 5.595      | 0.601        | 3.691         | 9.404       | 12.151         | 6.284        | 9.671        | 14.979        | 14.045      | 20.534       |
| 12            | 289.061            | 1.438         | 7.598      | 0.883        | 2.415         | 8.722       | 12.142         | 6.014        | 7.127        | 13.870        | 13.583      | 19.413       |
| 15            | 209.435            | 1.279         | 5.772      | 1.033        | 1.951         | 6.345       | 14.618         | 6.675        | 6.352        | 13.674        | 13.846      | 19.460       |
| 18            | 121.684            | 0.371         | 3.360      | 0.959        | 1.309         | 4.839       | 13.046         | 6.785        | 4.597        | 10.646        | 12.709      | 16.578       |
| 21            | 67.831             | 0.124         | 7.233      | 0.774        | 0.884         | 4.117       | 10.272         | 2.552        | 3.675        | 10.303        | 9.489       | 14.007       |
| 24            | 64.608             | 0.119         | 7.057      | 0.957        | 0.921         | 7.044       | 9.156          | 1.651        | 3.032        | 12.179        | 6.974       | 14.034       |
| 27            | 60.062             | 0.113         | 2.987      | 0.478        | 0.647         | 3.449       | 9.668          | 1.188        | 2.662        | 8.974         | 6.550       | 11.111       |
| 30            | 41.332             | 0.143         | 1.327      | 0.315        | 0.362         | 2.258       | 7.357          | 0.802        | 1.908        | 6.910         | 4.215       | 8.095        |
| 33            | 20.906             | 0.080         | 1.092      | 0.152        | 0.200         | 1.079       | 3.774          | 0.469        | 1.142        | 3.412         | 2.560       | 4.266        |
| 36            | 11.618             | 0.038         | 0.519      | 0.093        | 0.125         | 0.821       | 1.361          | 0.193        | 0.586        | 1.460         | 1.035       | 1.790        |
| 39            | 8.504              | 0.015         | 0.386      | 0.040        | 0.072         | 0.523       | 0.757          | 0.092        | 0.358        | 0.783         | 0.726       | 1.068        |
| 42            | 6.650              | 0.010         | 0.193      | 0.035        | 0.061         | 0.409       | 0.443          | 0.069        | 0.305        | 0.550         | 0.448       | 0.709        |
| 45            | 4.964              | 0.009         | 0.096      | 0.020        | 0.040         | 0.165       | 0.325          | 0.046        | 0.271        | 0.362         | 0.297       | 0.468        |
| 48            | 3.559              | 0.012         | 0.083      | 0.018        | 0.045         | 0.170       | 0.217          | 0.035        | 0.272        | 0.356         | 0.185       | 0.401        |
| 52            | 2.597              | 0.009         | 0.115      | 0.023        | 0.041         | 0.124       | 0.176          | 0.025        | 0.318        | 0.356         | 0.192       | 0.405        |
| 56            | 1.350              | 0.010         | 0.055      | 0.017        | 0.061         | 0.067       | 0.142          | 0.028        | 0.424        | 0.447         | 0.110       | 0.461        |
| 60            | 0.229              | 0.023         | 0.096      | 0.026        | 0.179         | 0.223       | 0.142          | 0.029        | 0.972        | 1.017         | 0.152       | 1.028        |
| 64            | -0.537             | 0.032         | 0.259      | 0.056        | 0.232         | 0.332       | 0.250          | 0.044        | 1.286        | 1.351         | 0.358       | 1.398        |
| 68            | -1.245             | 0.054         | 0.637      | 0.123        | 0.213         | 0.463       | 0.501          | 0.057        | 1.256        | 1.437         | 0.673       | 1.586        |

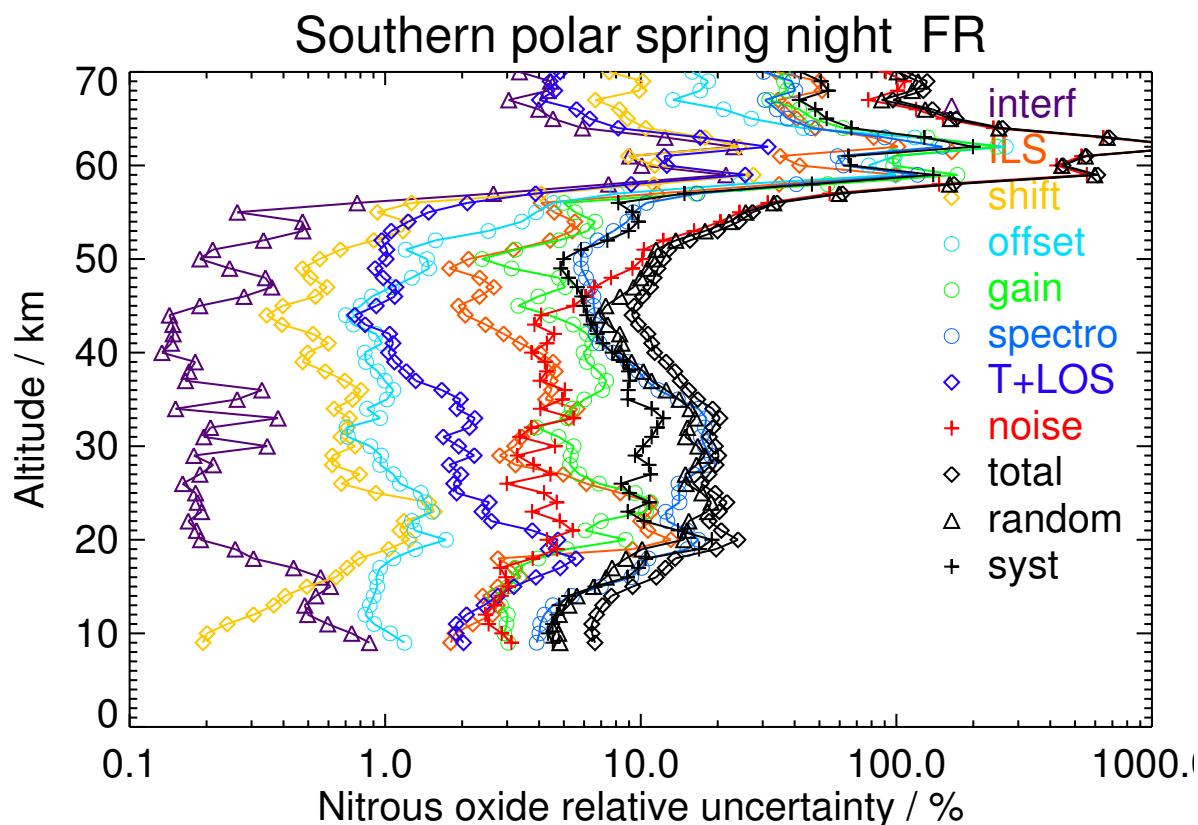

**Figure S166.** V8H\_N2O\_61 Southern polar spring night

**Table S167.** Nitrous oxide error budget for Southern polar summer day. All uncertainties are  $1\sigma$ .

| altitude (km) | mean target (ppbv) | interf (ppbv) | ILS (ppbv) | shift (ppbv) | offset (ppbv) | gain (ppbv) | spectro (ppbv) | T+LOS (ppbv) | noise (ppbv) | random (ppbv) | syst (ppbv) | total (ppbv) |
|---------------|--------------------|---------------|------------|--------------|---------------|-------------|----------------|--------------|--------------|---------------|-------------|--------------|
| 9             | 289.788            | 2.233         | 1.292      | 0.575        | 2.367         | 5.389       | 12.161         | 3.149        | 7.830        | 10.926        | 11.889      | 16.147       |
| 12            | 291.719            | 0.838         | 3.393      | 0.254        | 1.326         | 9.828       | 14.054         | 2.565        | 4.093        | 10.012        | 15.206      | 18.206       |
| 15            | 264.804            | 0.522         | 6.377      | 0.309        | 1.504         | 10.927      | 18.130         | 4.203        | 4.335        | 14.478        | 17.839      | 22.975       |
| 18            | 212.192            | 0.276         | 6.911      | 0.310        | 1.420         | 8.871       | 18.975         | 4.788        | 4.053        | 11.045        | 20.151      | 22.979       |
| 21            | 163.077            | 0.123         | 12.117     | 0.690        | 1.115         | 7.266       | 19.459         | 4.071        | 3.898        | 10.528        | 22.382      | 24.735       |
| 24            | 133.088            | 0.073         | 9.097      | 1.269        | 0.818         | 4.328       | 15.997         | 2.851        | 3.556        | 7.717         | 17.914      | 19.505       |
| 27            | 100.304            | 0.049         | 2.628      | 0.459        | 0.655         | 3.075       | 11.260         | 1.849        | 3.004        | 4.126         | 11.799      | 12.499       |
| 30            | 71.687             | 0.067         | 0.490      | 0.317        | 0.248         | 1.237       | 6.345          | 1.067        | 2.061        | 2.562         | 6.404       | 6.898        |
| 33            | 47.130             | 0.030         | 0.478      | 0.250        | 0.172         | 1.482       | 3.781          | 0.702        | 1.206        | 1.588         | 4.030       | 4.331        |
| 36            | 27.077             | 0.055         | 1.289      | 0.215        | 0.120         | 1.048       | 2.242          | 0.355        | 0.718        | 1.019         | 2.730       | 2.914        |
| 39            | 13.101             | 0.012         | 0.858      | 0.073        | 0.044         | 0.532       | 1.392          | 0.194        | 0.460        | 0.628         | 1.679       | 1.792        |
| 42            | 4.707              | 0.009         | 0.191      | 0.021        | 0.038         | 0.133       | 0.439          | 0.117        | 0.341        | 0.410         | 0.460       | 0.616        |
| 45            | 2.196              | 0.009         | 0.132      | 0.019        | 0.030         | 0.054       | 0.163          | 0.067        | 0.249        | 0.275         | 0.197       | 0.339        |
| 48            | 0.868              | 0.005         | 0.057      | 0.009        | 0.027         | 0.034       | 0.083          | 0.015        | 0.183        | 0.196         | 0.087       | 0.214        |
| 52            | 0.276              | 0.006         | 0.043      | 0.010        | 0.038         | 0.022       | 0.038          | 0.015        | 0.241        | 0.250         | 0.031       | 0.252        |
| 56            | 0.147              | 0.005         | 0.054      | 0.013        | 0.031         | 0.018       | 0.035          | 0.012        | 0.237        | 0.243         | 0.052       | 0.249        |
| 60            | 0.369              | 0.012         | 0.158      | 0.037        | 0.119         | 0.042       | 0.128          | 0.027        | 0.660        | 0.676         | 0.195       | 0.704        |
| 64            | -0.553             | 0.021         | 0.106      | 0.032        | 0.110         | 0.112       | 0.158          | 0.024        | 0.687        | 0.700         | 0.211       | 0.731        |
| 68            | -1.094             | 0.040         | 0.258      | 0.079        | 0.226         | 0.205       | 0.358          | 0.041        | 1.332        | 1.358         | 0.475       | 1.439        |

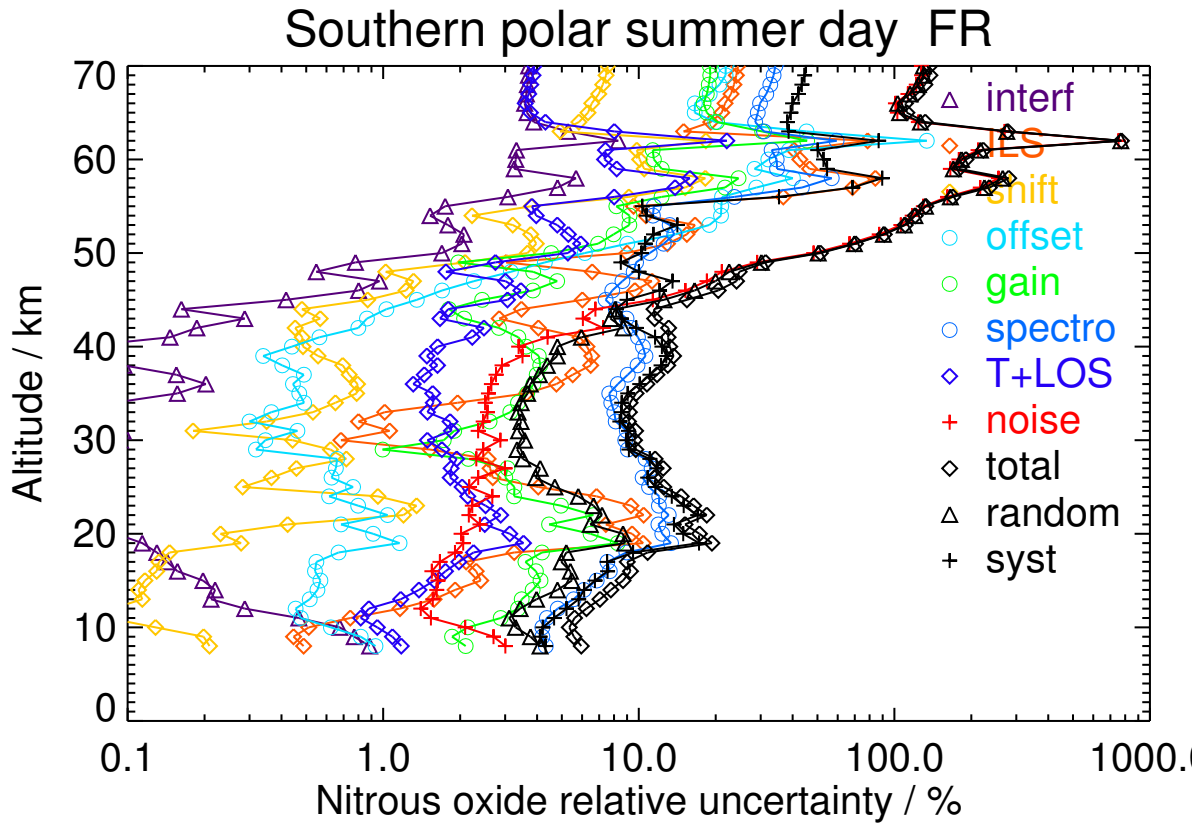

**Figure S167.** V8H\_N2O\_61 Southern polar summer day

**Table S168.** Nitrous oxide error budget for Southern polar summer night. All uncertainties are  $1\sigma$ .

| altitude (km) | mean target (ppbv) | interf (ppbv) | ILS (ppbv) | shift (ppbv) | offset (ppbv) | gain (ppbv) | spectro (ppbv) | T+LOS (ppbv) | noise (ppbv) | random (ppbv) | syst (ppbv) | total (ppbv) |
|---------------|--------------------|---------------|------------|--------------|---------------|-------------|----------------|--------------|--------------|---------------|-------------|--------------|
| 9             | 298.750            | 2.524         | 1.892      | 0.473        | 2.395         | 3.161       | 14.586         | 4.175        | 8.055        | 10.175        | 14.745      | 17.915       |
| 12            | 301.867            | 0.823         | 3.751      | 0.373        | 1.643         | 10.270      | 13.472         | 3.211        | 4.692        | 8.453         | 16.292      | 18.355       |
| 15            | 297.664            | 0.588         | 10.497     | 0.531        | 2.058         | 18.537      | 15.246         | 5.162        | 4.858        | 12.914        | 23.971      | 27.228       |
| 18            | 241.748            | 0.209         | 7.248      | 0.519        | 1.893         | 17.202      | 18.804         | 4.249        | 3.617        | 13.863        | 23.343      | 27.149       |
| 21            | 185.634            | 0.134         | 8.281      | 1.522        | 2.141         | 17.381      | 19.321         | 4.257        | 3.454        | 17.078        | 22.120      | 27.946       |
| 24            | 133.891            | 0.073         | 3.970      | 0.464        | 1.063         | 6.507       | 14.679         | 2.615        | 3.056        | 8.271         | 14.923      | 17.062       |
| 27            | 92.363             | 0.059         | 2.244      | 0.540        | 0.778         | 2.668       | 10.654         | 1.814        | 2.490        | 3.738         | 11.050      | 11.665       |
| 30            | 63.138             | 0.064         | 0.656      | 0.207        | 0.456         | 2.206       | 6.318          | 1.188        | 1.698        | 3.263         | 6.254       | 7.054        |
| 33            | 36.833             | 0.021         | 0.859      | 0.264        | 0.276         | 1.833       | 3.720          | 0.647        | 1.104        | 1.804         | 4.058       | 4.441        |
| 36            | 16.030             | 0.039         | 0.859      | 0.100        | 0.103         | 0.660       | 1.926          | 0.283        | 0.646        | 0.867         | 2.157       | 2.324        |
| 39            | 5.515              | 0.010         | 0.316      | 0.021        | 0.044         | 0.168       | 0.678          | 0.117        | 0.324        | 0.399         | 0.741       | 0.842        |
| 42            | 1.456              | 0.009         | 0.050      | 0.015        | 0.032         | 0.030       | 0.159          | 0.049        | 0.231        | 0.253         | 0.148       | 0.293        |
| 45            | 0.802              | 0.010         | 0.121      | 0.019        | 0.032         | 0.048       | 0.074          | 0.046        | 0.255        | 0.268         | 0.138       | 0.302        |
| 48            | 0.208              | 0.003         | 0.018      | 0.005        | 0.031         | 0.008       | 0.033          | 0.010        | 0.202        | 0.206         | 0.027       | 0.208        |
| 52            | 0.106              | 0.003         | 0.029      | 0.007        | 0.044         | 0.012       | 0.029          | 0.009        | 0.297        | 0.304         | 0.012       | 0.304        |
| 56            | 0.333              | 0.004         | 0.048      | 0.013        | 0.030         | 0.021       | 0.028          | 0.014        | 0.288        | 0.294         | 0.042       | 0.297        |
| 60            | 0.958              | 0.005         | 0.089      | 0.024        | 0.131         | 0.030       | 0.094          | 0.020        | 0.840        | 0.853         | 0.117       | 0.861        |
| 64            | -0.041             | 0.020         | 0.121      | 0.029        | 0.146         | 0.081       | 0.142          | 0.031        | 0.937        | 0.953         | 0.190       | 0.971        |
| 68            | -0.727             | 0.031         | 0.207      | 0.054        | 0.237         | 0.135       | 0.246          | 0.048        | 1.395        | 1.421         | 0.335       | 1.460        |

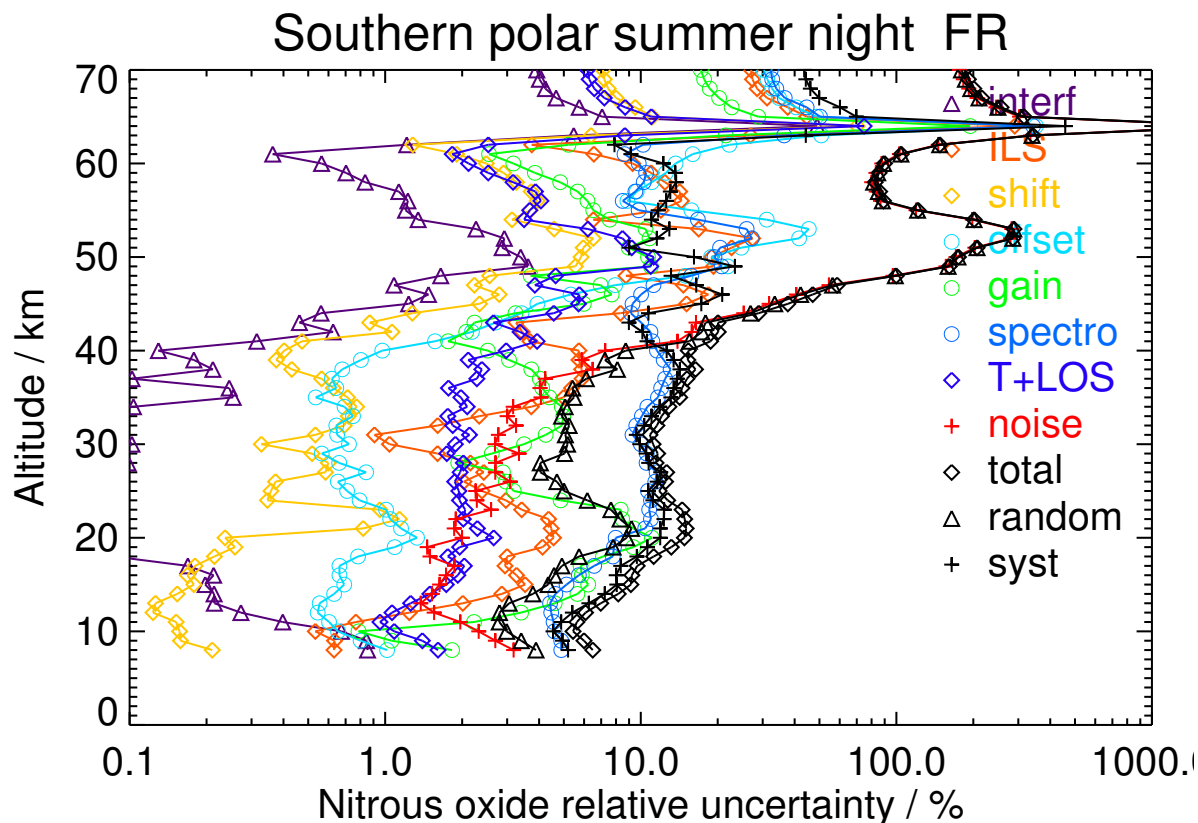

**Figure S168.** V8H\_N2O\_61 Southern polar summer night

**Table S169.** Nitrous oxide error budget for Southern polar autumn day. All uncertainties are  $1\sigma$ .

| altitude (km) | mean target (ppbv) | interf (ppbv) | ILS (ppbv) | shift (ppbv) | offset (ppbv) | gain (ppbv) | spectro (ppbv) | T+LOS (ppbv) | noise (ppbv) | random (ppbv) | syst (ppbv) | total (ppbv) |
|---------------|--------------------|---------------|------------|--------------|---------------|-------------|----------------|--------------|--------------|---------------|-------------|--------------|
| 9             | 291.221            | 1.730         | 0.624      | 0.481        | 2.679         | 4.933       | 12.802         | 3.025        | 8.096        | 9.390         | 13.621      | 16.544       |
| 12            | 300.992            | 1.553         | 3.605      | 0.335        | 1.732         | 11.275      | 12.430         | 3.590        | 4.659        | 7.342         | 16.759      | 18.296       |
| 15            | 269.927            | 1.658         | 6.638      | 0.602        | 1.811         | 11.272      | 13.969         | 5.775        | 5.805        | 9.626         | 18.629      | 20.969       |
| 18            | 215.349            | 0.478         | 5.253      | 0.752        | 1.814         | 15.584      | 16.405         | 4.640        | 4.374        | 8.579         | 22.599      | 24.172       |
| 21            | 153.012            | 0.452         | 2.419      | 1.549        | 1.954         | 12.944      | 17.122         | 3.238        | 3.572        | 6.874         | 21.189      | 22.276       |
| 24            | 103.378            | 0.190         | 2.020      | 0.625        | 1.243         | 6.315       | 12.119         | 2.143        | 3.175        | 5.410         | 13.349      | 14.404       |
| 27            | 58.292             | 0.106         | 1.159      | 0.185        | 0.665         | 1.886       | 8.634          | 1.530        | 2.495        | 3.773         | 8.617       | 9.407        |
| 30            | 25.935             | 0.037         | 0.792      | 0.166        | 0.322         | 1.073       | 4.469          | 0.937        | 1.542        | 2.495         | 4.350       | 5.014        |
| 33            | 8.101              | 0.030         | 0.389      | 0.117        | 0.178         | 0.834       | 1.611          | 0.373        | 0.862        | 1.392         | 1.560       | 2.091        |
| 36            | 1.853              | 0.015         | 0.091      | 0.040        | 0.083         | 0.270       | 0.395          | 0.110        | 0.489        | 0.659         | 0.253       | 0.706        |
| 39            | 0.417              | 0.005         | 0.045      | 0.015        | 0.051         | 0.099       | 0.151          | 0.036        | 0.350        | 0.386         | 0.111       | 0.402        |
| 42            | 0.011              | 0.004         | 0.022      | 0.020        | 0.051         | 0.128       | 0.048          | 0.031        | 0.299        | 0.326         | 0.081       | 0.336        |
| 45            | 0.661              | 0.005         | 0.029      | 0.040        | 0.058         | 0.284       | 0.061          | 0.075        | 0.308        | 0.342         | 0.271       | 0.437        |
| 48            | 0.276              | 0.003         | 0.018      | 0.013        | 0.053         | 0.081       | 0.052          | 0.023        | 0.390        | 0.398         | 0.083       | 0.407        |
| 52            | 0.496              | 0.003         | 0.021      | 0.017        | 0.082         | 0.102       | 0.049          | 0.029        | 0.567        | 0.578         | 0.093       | 0.585        |
| 56            | 1.111              | 0.006         | 0.043      | 0.053        | 0.087         | 0.346       | 0.066          | 0.088        | 0.548        | 0.582         | 0.324       | 0.666        |
| 60            | 0.577              | 0.002         | 0.036      | 0.021        | 0.176         | 0.097       | 0.061          | 0.031        | 1.235        | 1.250         | 0.097       | 1.253        |
| 64            | 0.358              | 0.006         | 0.023      | 0.013        | 0.201         | 0.092       | 0.050          | 0.024        | 1.305        | 1.324         | 0.051       | 1.325        |
| 68            | 0.317              | 0.008         | 0.020      | 0.018        | 0.264         | 0.146       | 0.049          | 0.031        | 1.546        | 1.572         | 0.116       | 1.576        |

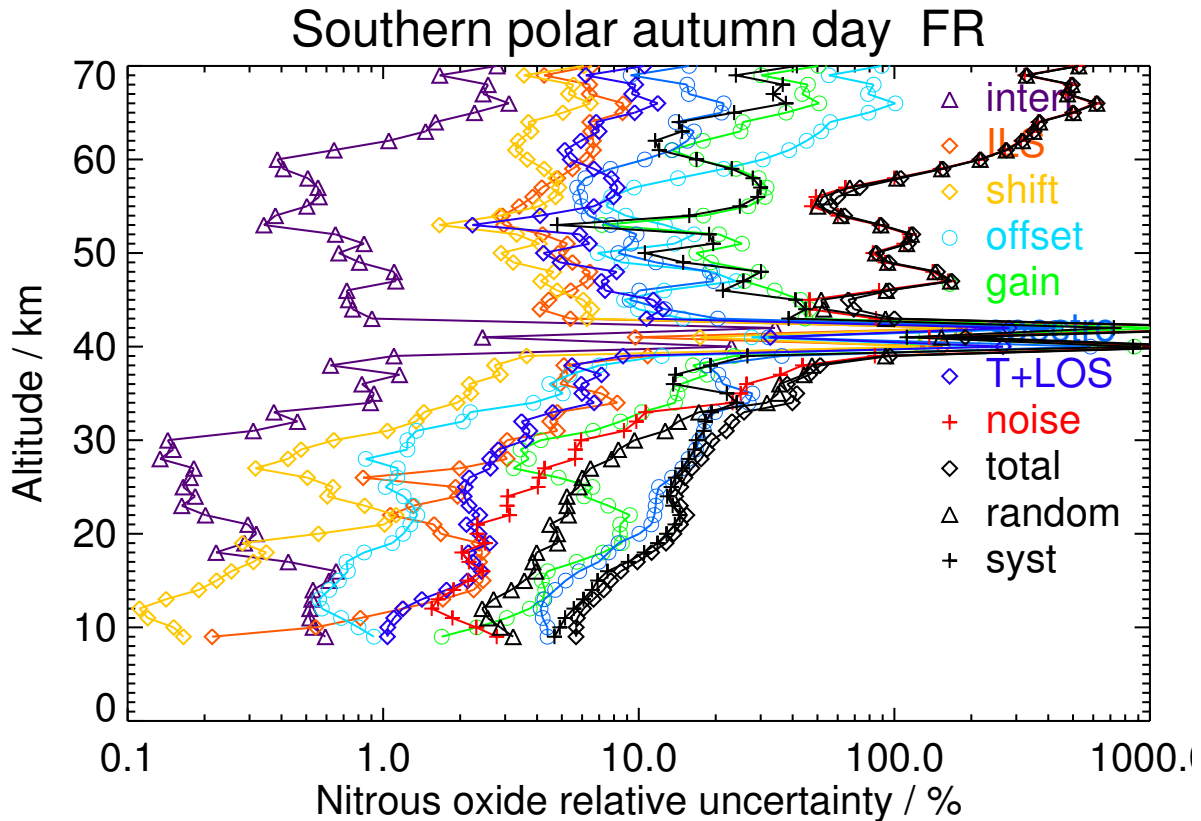

**Figure S169.** V8H\_N2O\_61 Southern polar autumn day

**Table S170.** Nitrous oxide error budget for Southern polar autumn night. All uncertainties are  $1\sigma$ .

| altitude (km) | mean target (ppbv) | interf (ppbv) | ILS (ppbv) | shift (ppbv) | offset (ppbv) | gain (ppbv) | spectro (ppbv) | T+LOS (ppbv) | noise (ppbv) | random (ppbv) | syst (ppbv) | total (ppbv) |
|---------------|--------------------|---------------|------------|--------------|---------------|-------------|----------------|--------------|--------------|---------------|-------------|--------------|
| 9             | 315.645            | 2.076         | 0.602      | 0.283        | 2.783         | 5.662       | 13.289         | 3.897        | 8.028        | 10.382        | 13.893      | 17.343       |
| 12            | 301.664            | 1.510         | 3.535      | 0.419        | 1.799         | 10.025      | 12.865         | 3.497        | 4.834        | 7.781         | 16.102      | 17.883       |
| 15            | 277.716            | 1.489         | 7.863      | 0.855        | 1.926         | 12.115      | 13.037         | 5.798        | 6.006        | 10.334        | 18.658      | 21.329       |
| 18            | 217.395            | 0.581         | 8.007      | 0.812        | 1.954         | 14.886      | 13.175         | 4.710        | 4.596        | 9.595         | 20.380      | 22.526       |
| 21            | 152.266            | 0.414         | 2.902      | 1.217        | 2.038         | 12.518      | 14.678         | 3.392        | 3.814        | 8.478         | 18.454      | 20.309       |
| 24            | 97.725             | 0.148         | 2.150      | 0.863        | 1.292         | 5.483       | 11.622         | 2.214        | 3.399        | 5.917         | 12.395      | 13.735       |
| 27            | 52.293             | 0.088         | 1.016      | 0.242        | 0.721         | 1.831       | 7.970          | 1.431        | 2.538        | 3.826         | 7.896       | 8.774        |
| 30            | 22.098             | 0.048         | 0.681      | 0.151        | 0.381         | 1.251       | 4.039          | 0.820        | 1.639        | 2.889         | 3.678       | 4.677        |
| 33            | 5.970              | 0.030         | 0.313      | 0.093        | 0.182         | 0.666       | 1.436          | 0.299        | 0.846        | 1.520         | 1.069       | 1.858        |
| 36            | 1.022              | 0.009         | 0.080      | 0.024        | 0.090         | 0.178       | 0.316          | 0.073        | 0.497        | 0.608         | 0.169       | 0.631        |
| 39            | 0.427              | 0.003         | 0.040      | 0.014        | 0.062         | 0.087       | 0.131          | 0.030        | 0.401        | 0.433         | 0.070       | 0.438        |
| 42            | 0.114              | 0.003         | 0.020      | 0.017        | 0.046         | 0.123       | 0.059          | 0.036        | 0.315        | 0.331         | 0.110       | 0.349        |
| 45            | 0.577              | 0.003         | 0.024      | 0.024        | 0.044         | 0.184       | 0.081          | 0.053        | 0.346        | 0.366         | 0.179       | 0.408        |
| 48            | 0.365              | 0.002         | 0.018      | 0.008        | 0.070         | 0.044       | 0.049          | 0.014        | 0.485        | 0.493         | 0.049       | 0.495        |
| 52            | 0.724              | 0.002         | 0.021      | 0.012        | 0.073         | 0.062       | 0.045          | 0.020        | 0.579        | 0.588         | 0.037       | 0.589        |
| 56            | 0.991              | 0.003         | 0.046      | 0.030        | 0.077         | 0.198       | 0.069          | 0.057        | 0.575        | 0.592         | 0.190       | 0.622        |
| 60            | 0.485              | 0.002         | 0.030      | 0.017        | 0.193         | 0.089       | 0.049          | 0.032        | 1.303        | 1.319         | 0.084       | 1.322        |
| 64            | 0.227              | 0.006         | 0.027      | 0.014        | 0.220         | 0.123       | 0.075          | 0.034        | 1.419        | 1.441         | 0.092       | 1.444        |
| 68            | 0.288              | 0.007         | 0.028      | 0.019        | 0.259         | 0.167       | 0.076          | 0.040        | 1.550        | 1.577         | 0.138       | 1.583        |

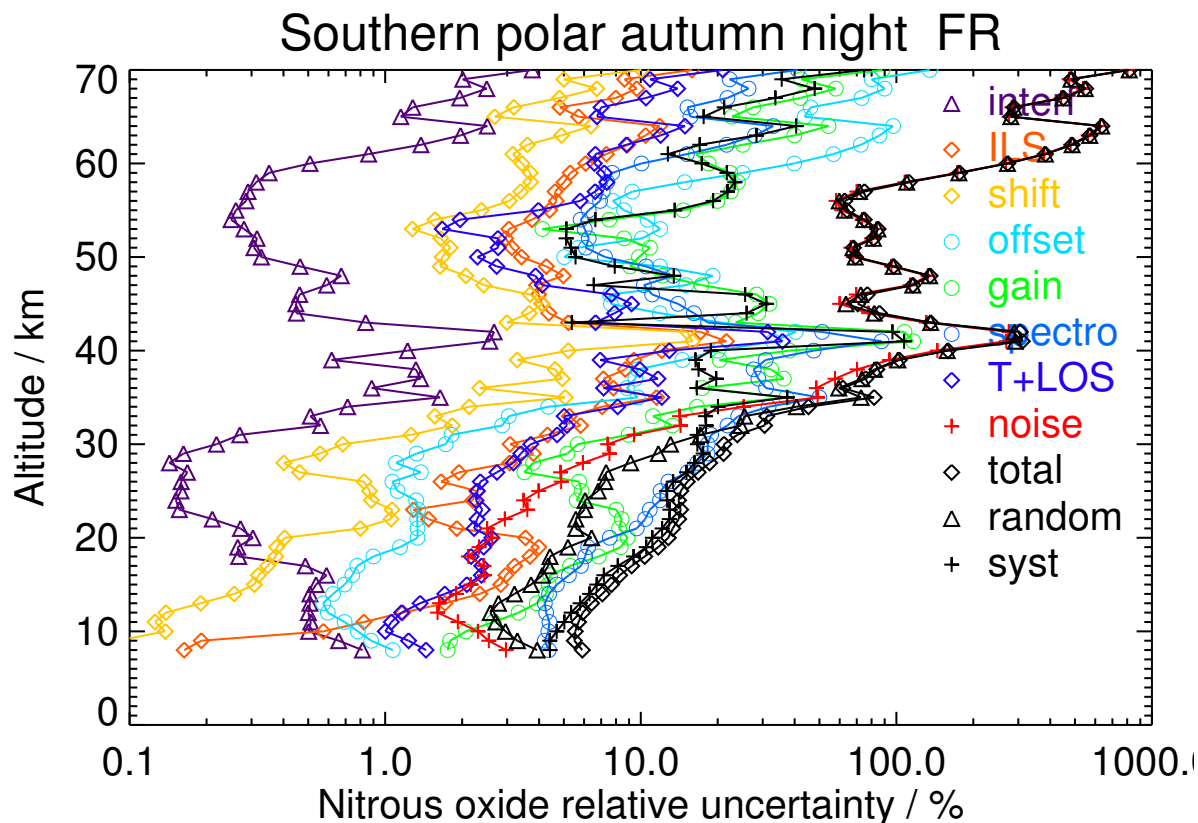

**Figure S170.** V8H\_N2O\_61 Southern polar autumn night

**S7 Nitrous oxide error contribution profile plots and tabulated values for RR NOM data (V8R\_N2O\_261)**



**Table S171.** Nitrous oxide error budget for Northern polar winter day. All uncertainties are  $1\sigma$ .

| altitude (km) | mean target (ppbv) | interf (ppbv) | ILS (ppbv) | shift (ppbv) | offset (ppbv) | gain (ppbv) | spectro (ppbv) | T+LOS (ppbv) | noise (ppbv) | random (ppbv) | syst (ppbv) | total (ppbv) |
|---------------|--------------------|---------------|------------|--------------|---------------|-------------|----------------|--------------|--------------|---------------|-------------|--------------|
| 12            | 277.970            | 4.890         | 5.064      | 0.291        | 2.126         | 8.187       | 15.971         | 5.355        | 9.911        | 14.849        | 16.813      | 22.431       |
| 15            | 249.137            | 4.292         | 4.621      | 0.302        | 1.096         | 6.098       | 17.419         | 3.810        | 4.613        | 9.964         | 17.837      | 20.432       |
| 18            | 196.645            | 0.809         | 5.797      | 0.456        | 0.772         | 10.233      | 18.928         | 3.557        | 3.041        | 12.322        | 19.187      | 22.803       |
| 21            | 186.107            | 0.479         | 6.573      | 0.276        | 0.694         | 8.175       | 20.017         | 2.589        | 3.062        | 11.267        | 20.016      | 22.969       |
| 24            | 156.460            | 0.371         | 4.588      | 0.257        | 0.576         | 5.763       | 16.152         | 2.077        | 2.879        | 7.707         | 16.398      | 18.119       |
| 27            | 125.933            | 0.191         | 3.103      | 0.268        | 0.575         | 4.024       | 13.341         | 1.906        | 2.894        | 7.093         | 12.881      | 14.705       |
| 30            | 88.711             | 0.140         | 1.107      | 0.226        | 0.349         | 2.096       | 10.277         | 1.417        | 1.995        | 5.625         | 9.261       | 10.835       |
| 33            | 51.224             | 0.105         | 0.654      | 0.231        | 0.181         | 1.131       | 6.987          | 0.963        | 1.597        | 3.684         | 6.366       | 7.355        |
| 36            | 19.387             | 0.063         | 0.615      | 0.107        | 0.117         | 0.755       | 2.919          | 0.369        | 1.121        | 2.177         | 2.480       | 3.300        |
| 39            | 10.444             | 0.036         | 0.302      | 0.046        | 0.084         | 0.321       | 1.145          | 0.158        | 0.877        | 1.249         | 0.866       | 1.520        |
| 42            | 6.363              | 0.020         | 0.171      | 0.022        | 0.059         | 0.137       | 0.556          | 0.087        | 0.789        | 0.842         | 0.532       | 0.996        |
| 45            | 3.676              | 0.014         | 0.102      | 0.020        | 0.049         | 0.089       | 0.355          | 0.051        | 0.775        | 0.796         | 0.342       | 0.867        |
| 48            | 1.537              | 0.015         | 0.110      | 0.023        | 0.084         | 0.139       | 0.228          | 0.040        | 0.884        | 0.899         | 0.256       | 0.935        |
| 52            | 0.261              | 0.017         | 0.056      | 0.020        | 0.100         | 0.088       | 0.091          | 0.020        | 1.047        | 1.056         | 0.107       | 1.061        |
| 56            | 0.400              | 0.018         | 0.058      | 0.013        | 0.177         | 0.086       | 0.050          | 0.019        | 1.405        | 1.420         | 0.067       | 1.421        |
| 60            | -0.125             | 0.021         | 0.090      | 0.037        | 0.321         | 0.299       | 0.108          | 0.041        | 1.828        | 1.867         | 0.268       | 1.886        |
| 64            | -0.518             | 0.027         | 0.108      | 0.052        | 0.410         | 0.445       | 0.172          | 0.050        | 1.990        | 2.054         | 0.393       | 2.091        |
| 68            | -2.039             | 0.022         | 0.082      | 0.021        | 0.407         | 0.231       | 0.126          | 0.033        | 1.880        | 1.927         | 0.256       | 1.944        |

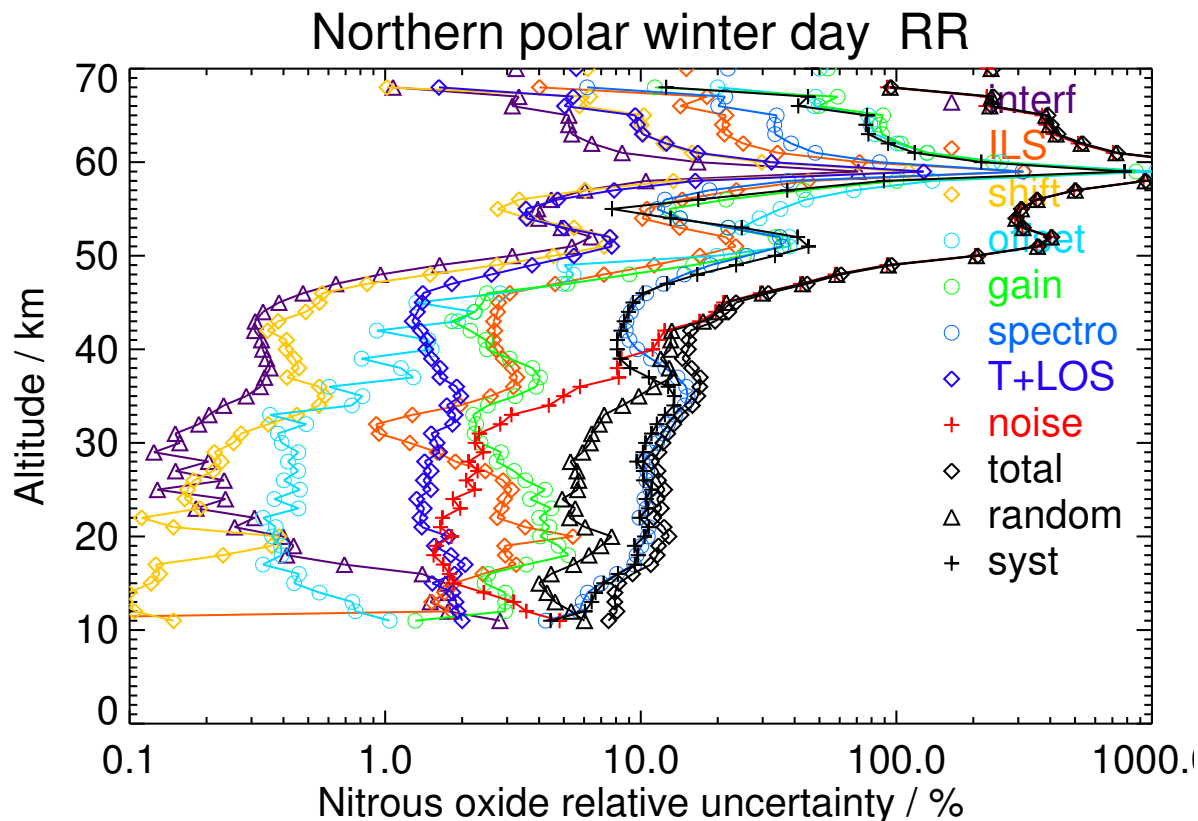

**Figure S171.** V8R\_N2O\_261 Northern polar winter day



**Table S172.** Nitrous oxide error budget for Northern polar winter night. All uncertainties are  $1\sigma$ .

| altitude (km) | mean target (ppbv) | interf (ppbv) | ILS (ppbv) | shift (ppbv) | offset (ppbv) | gain (ppbv) | spectro (ppbv) | T+LOS (ppbv) | noise (ppbv) | random (ppbv) | syst (ppbv) | total (ppbv) |
|---------------|--------------------|---------------|------------|--------------|---------------|-------------|----------------|--------------|--------------|---------------|-------------|--------------|
| 9             | 356.970            | 4.995         | 7.817      | 0.295        | 2.862         | 13.260      | 11.835         | 6.115        | 12.350       | 15.162        | 19.242      | 24.498       |
| 12            | 297.831            | 4.770         | 5.993      | 0.293        | 2.250         | 7.874       | 13.904         | 5.618        | 9.985        | 14.247        | 15.729      | 21.222       |
| 15            | 251.655            | 4.423         | 5.933      | 0.393        | 1.358         | 4.517       | 16.380         | 4.911        | 5.505        | 11.047        | 16.670      | 19.998       |
| 18            | 188.096            | 0.925         | 4.237      | 0.644        | 0.809         | 4.562       | 21.292         | 4.201        | 3.730        | 8.106         | 21.444      | 22.925       |
| 21            | 128.956            | 0.408         | 7.853      | 0.333        | 0.861         | 6.330       | 16.667         | 2.745        | 3.388        | 13.017        | 15.169      | 19.989       |
| 24            | 105.731            | 0.635         | 3.975      | 0.385        | 0.423         | 3.103       | 11.231         | 1.453        | 2.214        | 7.974         | 9.784       | 12.622       |
| 27            | 95.221             | 0.236         | 1.945      | 0.279        | 0.619         | 2.542       | 10.653         | 1.622        | 2.753        | 7.891         | 8.498       | 11.596       |
| 30            | 77.777             | 0.289         | 1.420      | 0.589        | 0.404         | 3.297       | 7.753          | 1.011        | 1.540        | 5.943         | 6.454       | 8.774        |
| 33            | 38.561             | 0.147         | 1.352      | 0.449        | 0.232         | 2.185       | 5.666          | 0.718        | 1.199        | 3.547         | 5.324       | 6.398        |
| 36            | 12.070             | 0.068         | 0.623      | 0.125        | 0.094         | 0.683       | 1.950          | 0.215        | 0.683        | 1.824         | 1.369       | 2.280        |
| 39            | 8.415              | 0.037         | 0.320      | 0.056        | 0.068         | 0.353       | 0.728          | 0.088        | 0.521        | 0.845         | 0.577       | 1.023        |
| 42            | 7.119              | 0.026         | 0.295      | 0.053        | 0.053         | 0.227       | 0.395          | 0.058        | 0.484        | 0.581         | 0.449       | 0.734        |
| 45            | 6.503              | 0.024         | 0.166      | 0.058        | 0.046         | 0.157       | 0.369          | 0.049        | 0.521        | 0.582         | 0.359       | 0.684        |
| 48            | 3.958              | 0.026         | 0.070      | 0.057        | 0.060         | 0.180       | 0.346          | 0.050        | 0.636        | 0.699         | 0.288       | 0.756        |
| 52            | 1.058              | 0.017         | 0.050      | 0.018        | 0.058         | 0.090       | 0.175          | 0.028        | 0.771        | 0.788         | 0.136       | 0.800        |
| 56            | 0.043              | 0.021         | 0.080      | 0.022        | 0.121         | 0.085       | 0.074          | 0.017        | 1.103        | 1.116         | 0.076       | 1.118        |
| 60            | -0.301             | 0.069         | 0.387      | 0.134        | 0.252         | 0.579       | 0.349          | 0.063        | 1.580        | 1.695         | 0.568       | 1.787        |
| 64            | -0.795             | 0.118         | 0.674      | 0.241        | 0.354         | 0.938       | 0.608          | 0.103        | 1.827        | 2.072         | 0.978       | 2.291        |
| 68            | 0.420              | 0.164         | 1.050      | 0.325        | 0.340         | 0.355       | 0.809          | 0.073        | 1.698        | 1.874         | 1.228       | 2.240        |

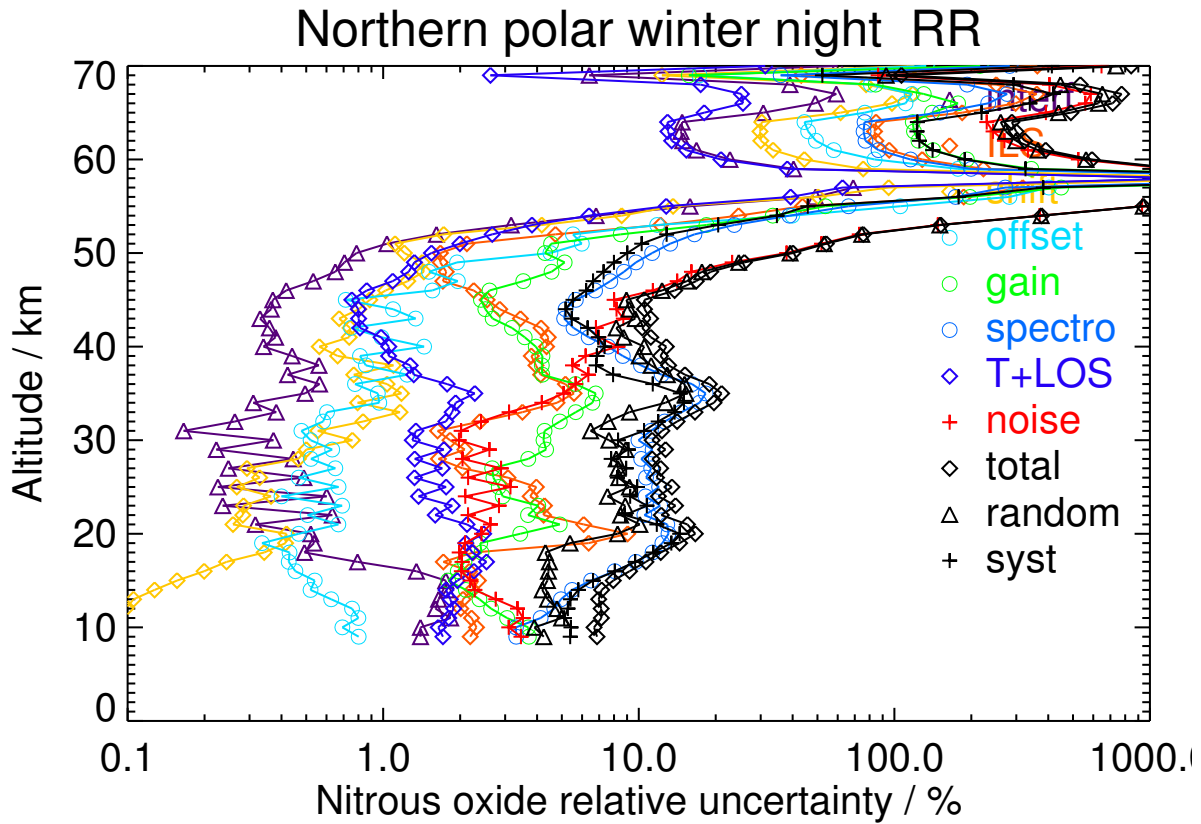

**Figure S172.** V8R\_N2O\_261 Northern polar winter night

**Table S173.** Nitrous oxide error budget for Northern polar spring day. All uncertainties are  $1\sigma$ .

| altitude (km) | mean target (ppbv) | interf (ppbv) | ILS (ppbv) | shift (ppbv) | offset (ppbv) | gain (ppbv) | spectro (ppbv) | T+LOS (ppbv) | noise (ppbv) | random (ppbv) | syst (ppbv) | total (ppbv) |
|---------------|--------------------|---------------|------------|--------------|---------------|-------------|----------------|--------------|--------------|---------------|-------------|--------------|
| 12            | 292.308            | 1.324         | 2.820      | 0.254        | 1.988         | 8.839       | 15.396         | 5.169        | 8.752        | 11.069        | 17.598      | 20.789       |
| 15            | 253.321            | 0.715         | 4.251      | 0.198        | 1.242         | 7.858       | 15.256         | 4.819        | 4.904        | 7.826         | 17.340      | 19.024       |
| 18            | 210.678            | 0.125         | 3.260      | 0.398        | 0.765         | 10.883      | 19.808         | 3.935        | 3.583        | 7.538         | 22.219      | 23.463       |
| 21            | 156.880            | 0.169         | 3.145      | 0.273        | 0.698         | 7.495       | 15.952         | 2.619        | 3.641        | 5.608         | 17.601      | 18.473       |
| 24            | 141.579            | 0.098         | 2.820      | 0.318        | 0.636         | 5.688       | 13.596         | 2.293        | 3.625        | 5.156         | 14.747      | 15.622       |
| 27            | 98.988             | 0.085         | 1.549      | 0.302        | 0.535         | 1.910       | 12.655         | 2.012        | 3.334        | 4.356         | 12.759      | 13.482       |
| 30            | 58.077             | 0.045         | 0.326      | 0.257        | 0.294         | 0.835       | 7.874          | 1.339        | 2.386        | 3.206         | 7.756       | 8.393        |
| 33            | 26.455             | 0.064         | 0.515      | 0.197        | 0.201         | 0.863       | 3.865          | 0.642        | 1.659        | 1.946         | 3.926       | 4.381        |
| 36            | 10.049             | 0.039         | 0.391      | 0.063        | 0.123         | 0.531       | 1.345          | 0.211        | 0.901        | 1.010         | 1.449       | 1.767        |
| 39            | 3.982              | 0.009         | 0.180      | 0.018        | 0.055         | 0.105       | 0.465          | 0.068        | 0.492        | 0.517         | 0.493       | 0.714        |
| 42            | 1.118              | 0.009         | 0.067      | 0.009        | 0.039         | 0.034       | 0.195          | 0.029        | 0.378        | 0.390         | 0.192       | 0.435        |
| 45            | 0.114              | 0.011         | 0.014      | 0.004        | 0.035         | 0.030       | 0.050          | 0.011        | 0.363        | 0.369         | 0.026       | 0.370        |
| 48            | 0.768              | 0.012         | 0.020      | 0.006        | 0.041         | 0.041       | 0.049          | 0.011        | 0.419        | 0.423         | 0.049       | 0.426        |
| 52            | 0.327              | 0.013         | 0.018      | 0.004        | 0.039         | 0.013       | 0.051          | 0.007        | 0.532        | 0.535         | 0.038       | 0.537        |
| 56            | 0.033              | 0.015         | 0.014      | 0.007        | 0.064         | 0.033       | 0.032          | 0.009        | 0.770        | 0.773         | 0.035       | 0.774        |
| 60            | 0.117              | 0.011         | 0.015      | 0.006        | 0.131         | 0.020       | 0.035          | 0.008        | 1.045        | 1.054         | 0.022       | 1.054        |
| 64            | -0.033             | 0.022         | 0.043      | 0.007        | 0.275         | 0.071       | 0.040          | 0.014        | 1.479        | 1.506         | 0.070       | 1.508        |
| 68            | -0.251             | 0.022         | 0.048      | 0.008        | 0.316         | 0.104       | 0.043          | 0.019        | 1.595        | 1.627         | 0.103       | 1.631        |

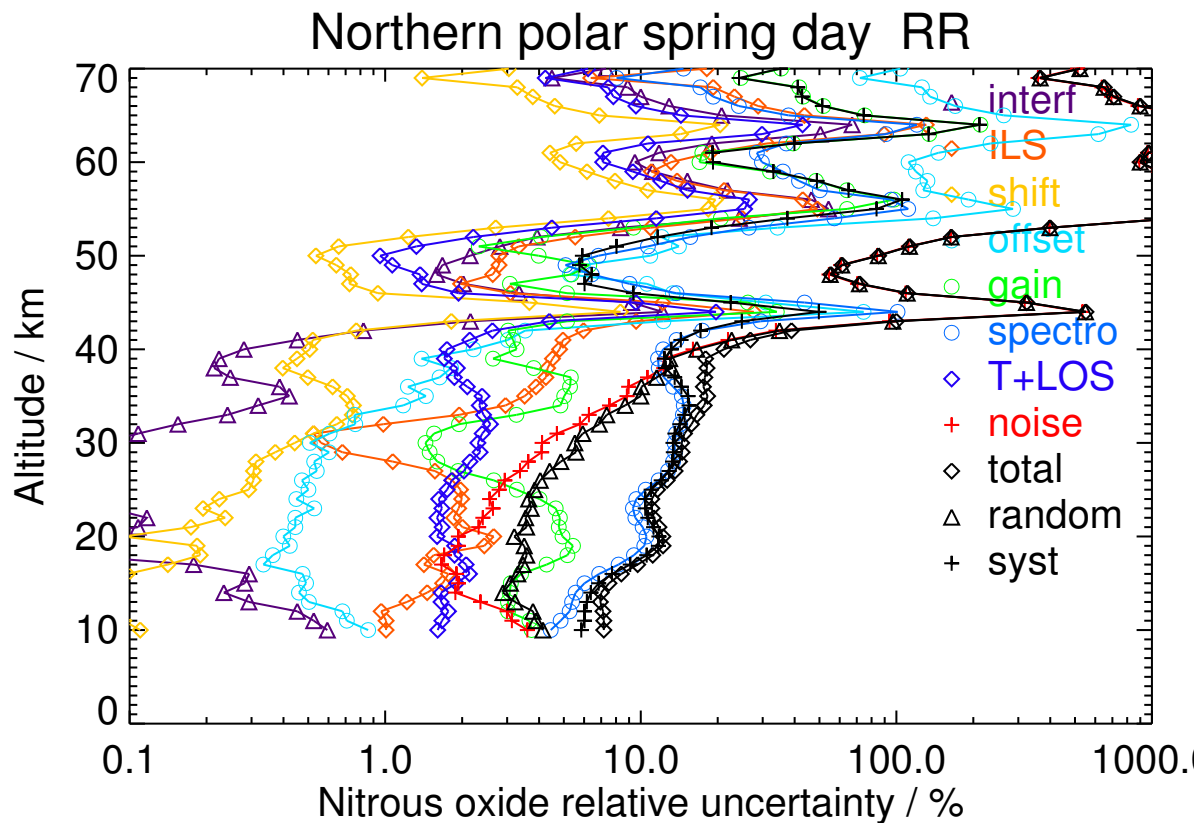

**Figure S173.** V8R\_N2O\_261 Northern polar spring day

**Table S174.** Nitrous oxide error budget for Northern polar spring night. All uncertainties are  $1\sigma$ .

| altitude (km) | mean target (ppbv) | interf (ppbv) | ILS (ppbv) | shift (ppbv) | offset (ppbv) | gain (ppbv) | spectro (ppbv) | T+LOS (ppbv) | noise (ppbv) | random (ppbv) | syst (ppbv) | total (ppbv) |
|---------------|--------------------|---------------|------------|--------------|---------------|-------------|----------------|--------------|--------------|---------------|-------------|--------------|
| 12            | 295.732            | 1.155         | 2.009      | 0.285        | 2.098         | 8.143       | 15.813         | 5.203        | 8.856        | 11.106        | 17.560      | 20.778       |
| 15            | 273.340            | 0.767         | 4.069      | 0.206        | 1.270         | 7.609       | 16.438         | 4.850        | 4.815        | 7.629         | 18.314      | 19.840       |
| 18            | 227.161            | 0.099         | 2.658      | 0.414        | 0.929         | 13.057      | 20.847         | 4.756        | 3.676        | 8.036         | 24.181      | 25.482       |
| 21            | 167.758            | 0.152         | 2.073      | 0.304        | 0.904         | 9.658       | 17.327         | 2.838        | 3.908        | 6.082         | 19.623      | 20.544       |
| 24            | 134.154            | 0.109         | 2.944      | 0.312        | 0.562         | 5.116       | 14.202         | 2.142        | 3.402        | 4.843         | 15.155      | 15.910       |
| 27            | 101.115            | 0.083         | 1.404      | 0.293        | 0.564         | 2.061       | 12.766         | 1.978        | 3.545        | 4.755         | 12.785      | 13.641       |
| 30            | 56.248             | 0.042         | 0.547      | 0.230        | 0.291         | 0.939       | 8.198          | 1.290        | 2.298        | 3.167         | 8.090       | 8.688        |
| 33            | 27.478             | 0.060         | 0.706      | 0.181        | 0.181         | 0.929       | 3.958          | 0.626        | 1.645        | 1.934         | 4.056       | 4.494        |
| 36            | 10.478             | 0.042         | 0.476      | 0.066        | 0.109         | 0.597       | 1.584          | 0.222        | 0.883        | 0.990         | 1.720       | 1.984        |
| 39            | 4.248              | 0.010         | 0.182      | 0.017        | 0.039         | 0.120       | 0.417          | 0.067        | 0.478        | 0.497         | 0.457       | 0.675        |
| 42            | 1.956              | 0.010         | 0.084      | 0.009        | 0.025         | 0.068       | 0.242          | 0.034        | 0.363        | 0.372         | 0.257       | 0.452        |
| 45            | 0.117              | 0.010         | 0.017      | 0.007        | 0.024         | 0.041       | 0.069          | 0.017        | 0.353        | 0.358         | 0.061       | 0.363        |
| 48            | 0.365              | 0.013         | 0.017      | 0.009        | 0.044         | 0.067       | 0.040          | 0.015        | 0.425        | 0.430         | 0.066       | 0.435        |
| 52            | 0.301              | 0.014         | 0.018      | 0.005        | 0.038         | 0.018       | 0.044          | 0.007        | 0.534        | 0.537         | 0.031       | 0.538        |
| 56            | 0.164              | 0.016         | 0.015      | 0.008        | 0.065         | 0.050       | 0.037          | 0.011        | 0.795        | 0.799         | 0.050       | 0.800        |
| 60            | 0.217              | 0.011         | 0.021      | 0.008        | 0.143         | 0.036       | 0.041          | 0.011        | 1.098        | 1.108         | 0.037       | 1.109        |
| 64            | -0.333             | 0.020         | 0.034      | 0.007        | 0.288         | 0.074       | 0.039          | 0.017        | 1.534        | 1.562         | 0.070       | 1.564        |
| 68            | -0.421             | 0.020         | 0.037      | 0.007        | 0.324         | 0.111       | 0.044          | 0.021        | 1.621        | 1.655         | 0.110       | 1.658        |

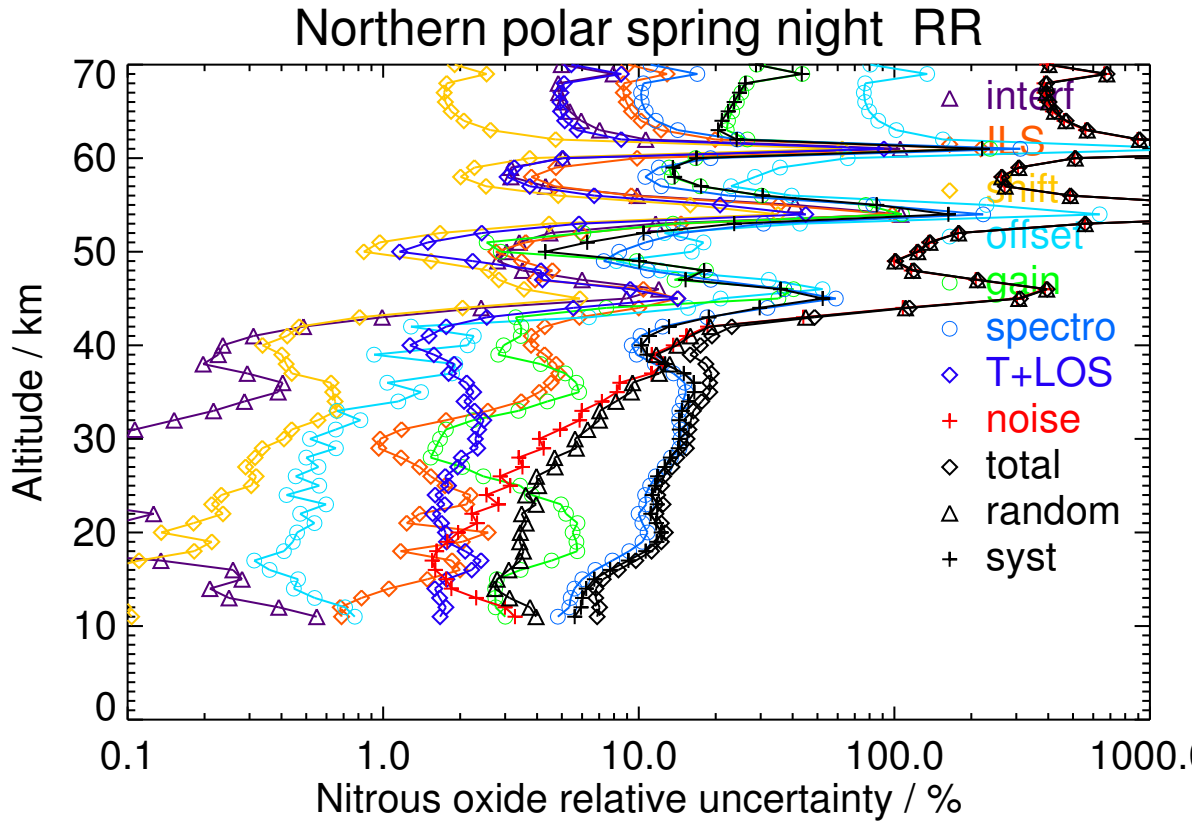

**Figure S174.** V8R\_N2O\_261 Northern polar spring night

**Table S175.** Nitrous oxide error budget for Northern polar summer day. All uncertainties are  $1\sigma$ .

| altitude (km) | mean target (ppbv) | interf (ppbv) | ILS (ppbv) | shift (ppbv) | offset (ppbv) | gain (ppbv) | spectro (ppbv) | T+LOS (ppbv) | noise (ppbv) | random (ppbv) | syst (ppbv) | total (ppbv) |
|---------------|--------------------|---------------|------------|--------------|---------------|-------------|----------------|--------------|--------------|---------------|-------------|--------------|
| 12            | 314.330            | 1.981         | 4.003      | 0.424        | 1.843         | 9.818       | 13.607         | 4.606        | 8.970        | 11.506        | 16.564      | 20.168       |
| 15            | 307.380            | 0.782         | 7.406      | 0.292        | 1.103         | 10.153      | 16.171         | 4.364        | 4.721        | 8.831         | 19.613      | 21.510       |
| 18            | 274.962            | 0.333         | 8.770      | 0.645        | 1.191         | 15.479      | 21.582         | 4.177        | 3.448        | 14.710        | 24.438      | 28.523       |
| 21            | 200.239            | 0.291         | 9.223      | 0.648        | 0.831         | 5.330       | 23.243         | 3.525        | 3.836        | 9.411         | 24.361      | 26.116       |
| 24            | 150.198            | 0.167         | 2.622      | 0.209        | 0.404         | 1.212       | 13.641         | 1.870        | 2.427        | 3.867         | 13.751      | 14.285       |
| 27            | 129.040            | 0.120         | 0.571      | 0.573        | 0.629         | 1.488       | 11.747         | 2.176        | 3.361        | 4.296         | 11.784      | 12.542       |
| 30            | 85.012             | 0.078         | 0.814      | 0.596        | 0.274         | 2.745       | 8.254          | 1.085        | 1.483        | 2.307         | 8.650       | 8.953        |
| 33            | 45.519             | 0.045         | 1.542      | 0.382        | 0.144         | 1.859       | 4.580          | 0.630        | 1.070        | 1.542         | 5.113       | 5.340        |
| 36            | 18.501             | 0.118         | 1.152      | 0.079        | 0.074         | 0.775       | 2.340          | 0.261        | 0.644        | 0.843         | 2.684       | 2.813        |
| 39            | 5.643              | 0.026         | 0.328      | 0.079        | 0.036         | 0.148       | 0.681          | 0.089        | 0.346        | 0.421         | 0.743       | 0.854        |
| 42            | 2.087              | 0.009         | 0.069      | 0.015        | 0.020         | 0.030       | 0.189          | 0.032        | 0.224        | 0.248         | 0.177       | 0.305        |
| 45            | 0.866              | 0.008         | 0.018      | 0.007        | 0.020         | 0.010       | 0.077          | 0.016        | 0.206        | 0.211         | 0.069       | 0.223        |
| 48            | 0.288              | 0.009         | 0.029      | 0.012        | 0.018         | 0.009       | 0.040          | 0.013        | 0.237        | 0.240         | 0.038       | 0.243        |
| 52            | 0.128              | 0.010         | 0.014      | 0.004        | 0.015         | 0.007       | 0.022          | 0.005        | 0.294        | 0.296         | 0.011       | 0.296        |
| 56            | 0.061              | 0.015         | 0.026      | 0.012        | 0.034         | 0.010       | 0.027          | 0.005        | 0.456        | 0.459         | 0.032       | 0.460        |
| 60            | -0.165             | 0.011         | 0.030      | 0.016        | 0.068         | 0.017       | 0.035          | 0.007        | 0.661        | 0.665         | 0.040       | 0.666        |
| 64            | -0.280             | 0.037         | 0.098      | 0.031        | 0.182         | 0.077       | 0.111          | 0.011        | 1.087        | 1.104         | 0.161       | 1.116        |
| 68            | -0.148             | 0.053         | 0.222      | 0.079        | 0.251         | 0.109       | 0.233          | 0.018        | 1.434        | 1.461         | 0.334       | 1.499        |

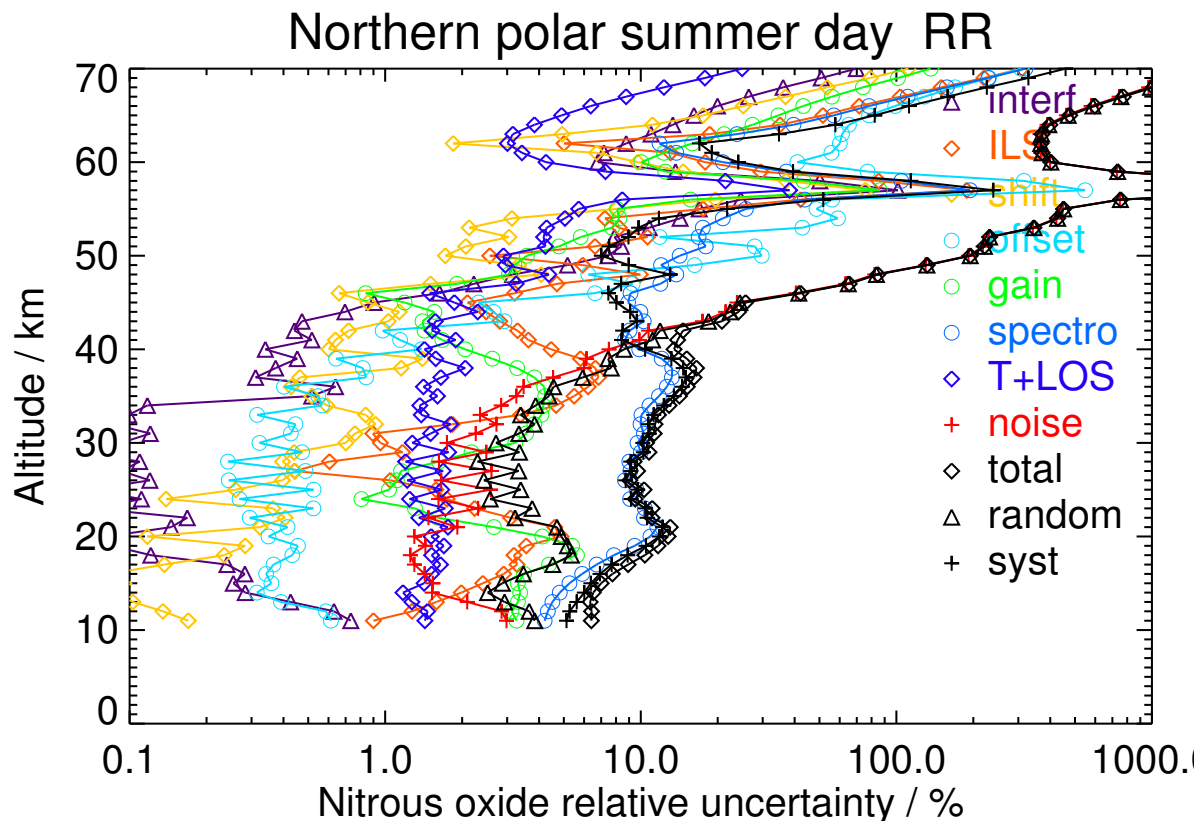

**Figure S175.** V8R\_N2O\_261 Northern polar summer day

**Table S176.** Nitrous oxide error budget for Northern polar summer night. All uncertainties are  $1\sigma$ .

| altitude (km) | mean target (ppbv) | interf (ppbv) | ILS (ppbv) | shift (ppbv) | offset (ppbv) | gain (ppbv) | spectro (ppbv) | T+LOS (ppbv) | noise (ppbv) | random (ppbv) | syst (ppbv) | total (ppbv) |
|---------------|--------------------|---------------|------------|--------------|---------------|-------------|----------------|--------------|--------------|---------------|-------------|--------------|
| 15            | 309.561            | 1.110         | 8.728      | 0.179        | 2.416         | 7.575       | 19.564         | 10.202       | 7.745        | 13.808        | 22.289      | 26.219       |
| 18            | 278.569            | 0.229         | 8.114      | 0.426        | 1.320         | 18.639      | 20.303         | 5.779        | 3.151        | 11.526        | 27.164      | 29.508       |
| 21            | 203.980            | 0.187         | 5.019      | 0.434        | 1.004         | 11.861      | 22.206         | 3.655        | 3.609        | 10.287        | 24.099      | 26.203       |
| 24            | 144.815            | 0.139         | 2.482      | 0.214        | 0.522         | 2.337       | 13.819         | 2.268        | 2.797        | 4.663         | 13.934      | 14.693       |
| 27            | 118.134            | 0.094         | 1.264      | 0.369        | 0.544         | 1.656       | 12.483         | 2.095        | 3.123        | 4.171         | 12.544      | 13.220       |
| 30            | 66.892             | 0.044         | 0.530      | 0.341        | 0.293         | 2.385       | 8.030          | 1.258        | 1.730        | 2.540         | 8.293       | 8.674        |
| 33            | 27.539             | 0.054         | 1.040      | 0.195        | 0.149         | 1.427       | 3.620          | 0.688        | 1.194        | 1.531         | 3.980       | 4.265        |
| 36            | 7.810              | 0.043         | 0.466      | 0.125        | 0.069         | 0.277       | 1.251          | 0.203        | 0.653        | 0.767         | 1.327       | 1.533        |
| 39            | 2.240              | 0.018         | 0.138      | 0.025        | 0.028         | 0.055       | 0.258          | 0.056        | 0.332        | 0.365         | 0.265       | 0.451        |
| 42            | 0.683              | 0.010         | 0.025      | 0.011        | 0.020         | 0.023       | 0.094          | 0.021        | 0.236        | 0.244         | 0.085       | 0.258        |
| 45            | 0.217              | 0.008         | 0.011      | 0.006        | 0.016         | 0.022       | 0.028          | 0.010        | 0.235        | 0.238         | 0.021       | 0.239        |
| 48            | 0.285              | 0.011         | 0.020      | 0.013        | 0.026         | 0.034       | 0.033          | 0.010        | 0.293        | 0.297         | 0.036       | 0.300        |
| 52            | 0.038              | 0.014         | 0.009      | 0.003        | 0.022         | 0.008       | 0.026          | 0.005        | 0.386        | 0.388         | 0.012       | 0.388        |
| 56            | 0.409              | 0.019         | 0.016      | 0.012        | 0.045         | 0.037       | 0.036          | 0.008        | 0.617        | 0.620         | 0.041       | 0.622        |
| 60            | 0.188              | 0.014         | 0.013      | 0.008        | 0.115         | 0.022       | 0.039          | 0.009        | 0.929        | 0.937         | 0.030       | 0.937        |
| 64            | -0.360             | 0.031         | 0.041      | 0.027        | 0.257         | 0.198       | 0.096          | 0.029        | 1.458        | 1.484         | 0.206       | 1.498        |
| 68            | -0.267             | 0.039         | 0.085      | 0.056        | 0.282         | 0.266       | 0.163          | 0.038        | 1.536        | 1.569         | 0.298       | 1.597        |

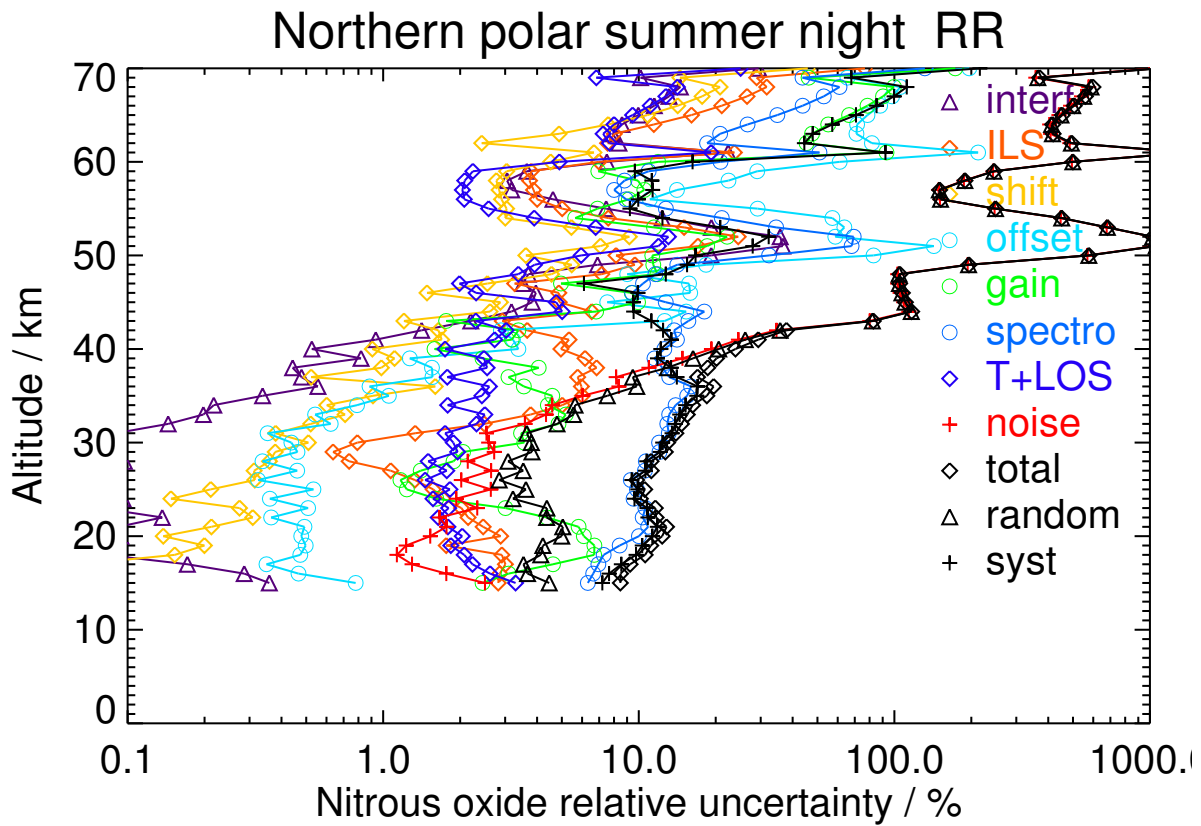

**Figure S176.** V8R\_N2O\_261 Northern polar summer night

**Table S177.** Nitrous oxide error budget for Northern polar autumn day. All uncertainties are  $1\sigma$ .

| altitude (km) | mean target (ppbv) | interf (ppbv) | ILS (ppbv) | shift (ppbv) | offset (ppbv) | gain (ppbv) | spectro (ppbv) | T+LOS (ppbv) | noise (ppbv) | random (ppbv) | syst (ppbv) | total (ppbv) |
|---------------|--------------------|---------------|------------|--------------|---------------|-------------|----------------|--------------|--------------|---------------|-------------|--------------|
| 15            | 280.757            | 2.866         | 2.806      | 0.199        | 1.838         | 6.452       | 17.130         | 5.639        | 7.503        | 10.457        | 18.258      | 21.040       |
| 18            | 237.518            | 0.564         | 2.951      | 0.484        | 0.758         | 11.689      | 21.160         | 5.027        | 3.369        | 8.800         | 23.524      | 25.116       |
| 21            | 168.289            | 0.319         | 4.015      | 0.210        | 0.915         | 10.710      | 18.682         | 2.975        | 3.740        | 8.747         | 20.668      | 22.443       |
| 24            | 123.662            | 0.229         | 3.319      | 0.249        | 0.646         | 5.484       | 13.534         | 2.281        | 3.443        | 5.867         | 14.402      | 15.551       |
| 27            | 76.738             | 0.115         | 2.498      | 0.167        | 0.526         | 2.273       | 11.438         | 1.712        | 3.054        | 5.339         | 11.239      | 12.442       |
| 30            | 30.126             | 0.063         | 0.681      | 0.134        | 0.356         | 1.791       | 5.590          | 0.977        | 1.857        | 4.048         | 4.805       | 6.282        |
| 33            | 8.602              | 0.048         | 0.373      | 0.068        | 0.177         | 0.685       | 1.900          | 0.389        | 1.247        | 2.069         | 1.298       | 2.442        |
| 36            | 3.115              | 0.026         | 0.246      | 0.032        | 0.070         | 0.468       | 0.714          | 0.114        | 0.628        | 1.034         | 0.364       | 1.097        |
| 39            | 2.141              | 0.014         | 0.161      | 0.018        | 0.046         | 0.275       | 0.366          | 0.044        | 0.490        | 0.671         | 0.173       | 0.693        |
| 42            | 2.076              | 0.010         | 0.114      | 0.014        | 0.028         | 0.165       | 0.268          | 0.025        | 0.471        | 0.560         | 0.150       | 0.580        |
| 45            | 1.506              | 0.012         | 0.059      | 0.009        | 0.026         | 0.066       | 0.232          | 0.017        | 0.526        | 0.570         | 0.119       | 0.583        |
| 48            | 0.717              | 0.015         | 0.025      | 0.007        | 0.063         | 0.054       | 0.108          | 0.019        | 0.655        | 0.665         | 0.077       | 0.670        |
| 52            | 0.809              | 0.018         | 0.021      | 0.009        | 0.064         | 0.050       | 0.065          | 0.014        | 0.801        | 0.807         | 0.056       | 0.809        |
| 56            | 0.724              | 0.020         | 0.020      | 0.010        | 0.099         | 0.064       | 0.069          | 0.017        | 1.077        | 1.084         | 0.069       | 1.086        |
| 60            | -0.101             | 0.015         | 0.027      | 0.008        | 0.197         | 0.049       | 0.049          | 0.015        | 1.380        | 1.396         | 0.033       | 1.396        |
| 64            | -0.599             | 0.022         | 0.058      | 0.013        | 0.322         | 0.163       | 0.056          | 0.029        | 1.728        | 1.763         | 0.137       | 1.768        |
| 68            | -0.668             | 0.024         | 0.067      | 0.017        | 0.336         | 0.207       | 0.064          | 0.035        | 1.698        | 1.737         | 0.178       | 1.746        |

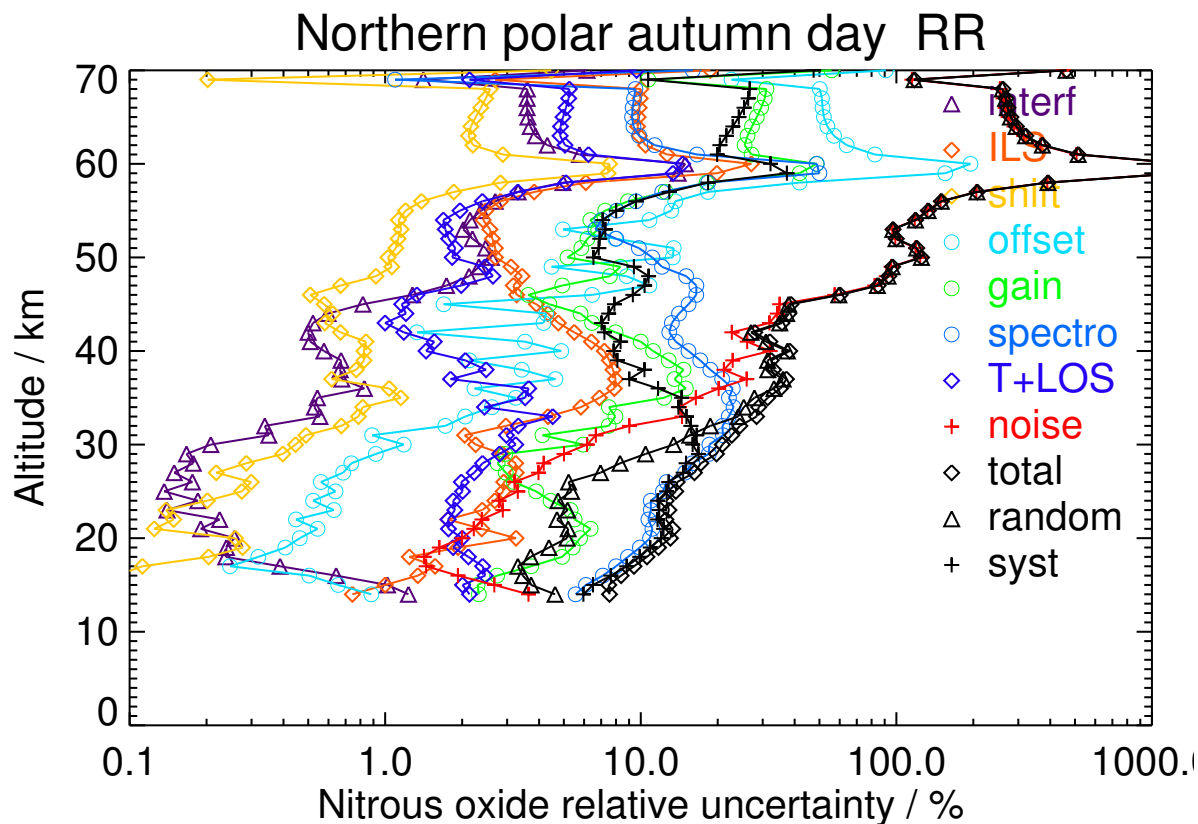

**Figure S177.** V8R\_N2O\_261 Northern polar autumn day

**Table S178.** Nitrous oxide error budget for Northern polar autumn night. All uncertainties are  $1\sigma$ .

| altitude (km) | mean target (ppbv) | interf (ppbv) | ILS (ppbv) | shift (ppbv) | offset (ppbv) | gain (ppbv) | spectro (ppbv) | T+LOS (ppbv) | noise (ppbv) | random (ppbv) | syst (ppbv) | total (ppbv) |
|---------------|--------------------|---------------|------------|--------------|---------------|-------------|----------------|--------------|--------------|---------------|-------------|--------------|
| 15            | 275.688            | 3.118         | 2.609      | 0.263        | 1.874         | 6.134       | 17.998         | 5.848        | 7.315        | 10.771        | 18.798      | 21.665       |
| 18            | 231.823            | 0.612         | 2.327      | 0.545        | 0.831         | 12.031      | 22.358         | 4.962        | 3.567        | 8.051         | 24.979      | 26.244       |
| 21            | 169.711            | 0.331         | 3.707      | 0.203        | 0.836         | 9.101       | 19.640         | 2.798        | 3.767        | 7.526         | 21.179      | 22.476       |
| 24            | 121.672            | 0.313         | 3.438      | 0.233        | 0.619         | 5.277       | 14.808         | 2.221        | 3.349        | 5.821         | 15.548      | 16.602       |
| 27            | 69.227             | 0.128         | 2.140      | 0.181        | 0.523         | 2.130       | 11.463         | 1.610        | 3.028        | 5.313         | 11.153      | 12.353       |
| 30            | 27.878             | 0.066         | 0.600      | 0.187        | 0.338         | 2.010       | 4.405          | 0.813        | 1.718        | 3.353         | 4.041       | 5.251        |
| 33            | 20.534             | 0.065         | 0.608      | 0.286        | 0.227         | 2.055       | 3.136          | 0.387        | 1.253        | 3.580         | 1.861       | 4.035        |
| 36            | 13.088             | 0.052         | 1.012      | 0.195        | 0.113         | 1.241       | 2.626          | 0.180        | 0.731        | 2.876         | 1.345       | 3.175        |
| 39            | 7.512              | 0.037         | 0.765      | 0.072        | 0.081         | 0.680       | 1.594          | 0.099        | 0.580        | 1.805         | 0.831       | 1.987        |
| 42            | 4.060              | 0.019         | 0.402      | 0.034        | 0.044         | 0.330       | 0.925          | 0.056        | 0.512        | 1.081         | 0.478       | 1.181        |
| 45            | 1.620              | 0.013         | 0.093      | 0.021        | 0.027         | 0.067       | 0.350          | 0.027        | 0.506        | 0.605         | 0.165       | 0.628        |
| 48            | 1.197              | 0.015         | 0.032      | 0.010        | 0.062         | 0.078       | 0.104          | 0.024        | 0.613        | 0.625         | 0.091       | 0.632        |
| 52            | 0.990              | 0.018         | 0.034      | 0.010        | 0.059         | 0.044       | 0.085          | 0.014        | 0.723        | 0.729         | 0.077       | 0.733        |
| 56            | 0.423              | 0.020         | 0.037      | 0.015        | 0.094         | 0.078       | 0.067          | 0.018        | 1.018        | 1.026         | 0.082       | 1.029        |
| 60            | 0.549              | 0.014         | 0.035      | 0.013        | 0.192         | 0.077       | 0.057          | 0.022        | 1.339        | 1.355         | 0.070       | 1.357        |
| 64            | 0.433              | 0.021         | 0.102      | 0.029        | 0.317         | 0.081       | 0.109          | 0.023        | 1.711        | 1.748         | 0.059       | 1.749        |
| 68            | -0.285             | 0.018         | 0.078      | 0.018        | 0.335         | 0.087       | 0.076          | 0.022        | 1.688        | 1.725         | 0.075       | 1.727        |

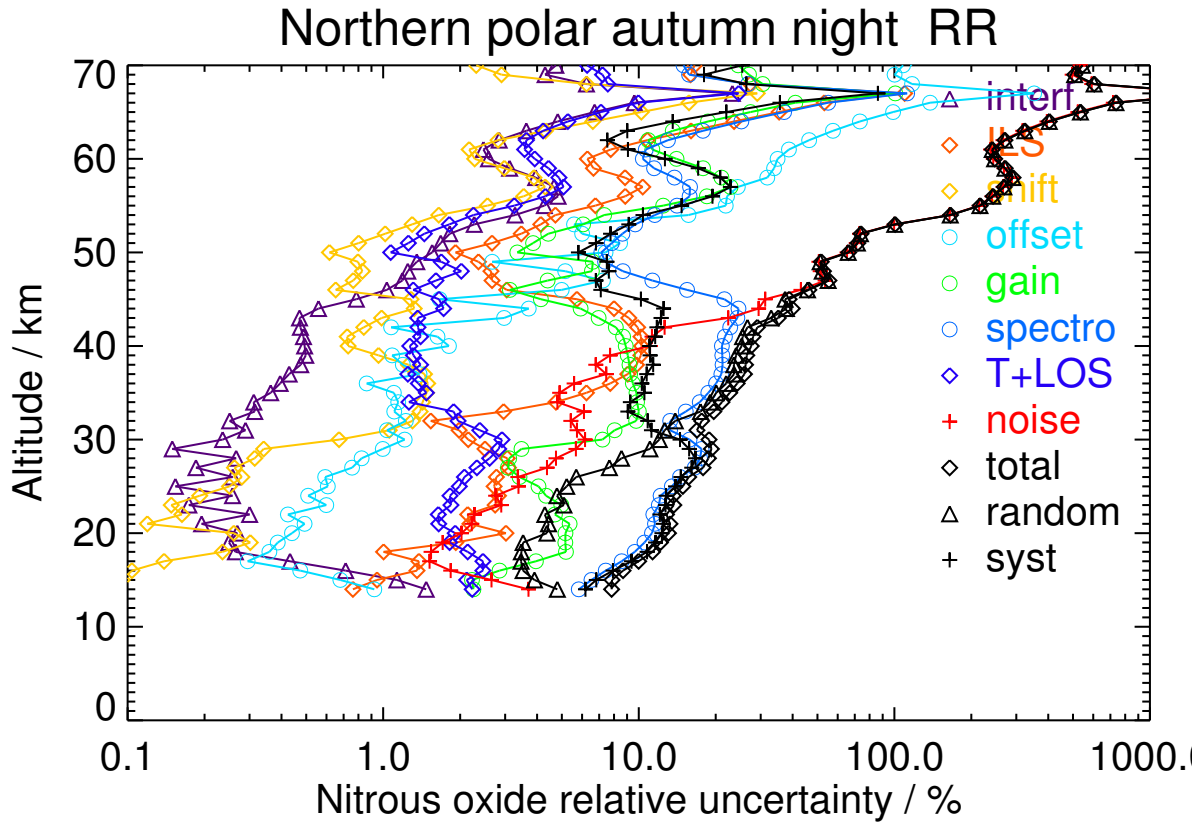

**Figure S178.** V8R\_N2O\_261 Northern polar autumn night



**Table S179.** Nitrous oxide error budget for Northern midlatitude winter day. All uncertainties are  $1\sigma$ .

| altitude (km) | mean target (ppbv) | interf (ppbv) | ILS (ppbv) | shift (ppbv) | offset (ppbv) | gain (ppbv) | spectro (ppbv) | T+LOS (ppbv) | noise (ppbv) | random (ppbv) | syst (ppbv) | total (ppbv) |
|---------------|--------------------|---------------|------------|--------------|---------------|-------------|----------------|--------------|--------------|---------------|-------------|--------------|
| 12            | 298.156            | 1.653         | 3.711      | 0.201        | 2.210         | 7.875       | 13.159         | 4.825        | 9.962        | 12.106        | 15.250      | 19.471       |
| 15            | 290.074            | 0.977         | 9.642      | 0.162        | 1.380         | 10.329      | 15.343         | 4.439        | 5.252        | 9.749         | 19.753      | 22.028       |
| 18            | 263.462            | 0.381         | 9.144      | 0.490        | 1.726         | 17.119      | 23.324         | 5.574        | 4.164        | 13.865        | 27.933      | 31.184       |
| 21            | 207.522            | 0.259         | 8.192      | 0.337        | 0.699         | 6.614       | 21.918         | 3.335        | 3.796        | 9.403         | 23.001      | 24.849       |
| 24            | 183.492            | 0.242         | 6.520      | 0.282        | 0.758         | 4.045       | 20.234         | 2.738        | 3.361        | 8.316         | 20.460      | 22.086       |
| 27            | 130.396            | 0.158         | 2.646      | 0.474        | 0.633         | 2.264       | 13.781         | 2.170        | 3.265        | 6.874         | 13.069      | 14.767       |
| 30            | 112.650            | 0.092         | 1.699      | 0.597        | 0.451         | 3.396       | 10.350         | 1.596        | 2.237        | 5.076         | 10.193      | 11.386       |
| 33            | 73.858             | 0.069         | 2.355      | 0.522        | 0.301         | 2.710       | 9.591          | 1.108        | 1.636        | 4.215         | 9.559       | 10.448       |
| 36            | 20.317             | 0.056         | 1.325      | 0.167        | 0.167         | 1.040       | 3.922          | 0.438        | 0.949        | 2.725         | 3.456       | 4.401        |
| 39            | 6.961              | 0.026         | 0.426      | 0.049        | 0.098         | 0.287       | 1.113          | 0.141        | 0.579        | 1.122         | 0.781       | 1.368        |
| 42            | 3.921              | 0.012         | 0.198      | 0.037        | 0.073         | 0.118       | 0.387          | 0.056        | 0.472        | 0.579         | 0.317       | 0.660        |
| 45            | 3.366              | 0.012         | 0.156      | 0.027        | 0.076         | 0.083       | 0.301          | 0.034        | 0.531        | 0.593         | 0.245       | 0.642        |
| 48            | 1.683              | 0.015         | 0.054      | 0.017        | 0.086         | 0.034       | 0.223          | 0.025        | 0.591        | 0.620         | 0.168       | 0.642        |
| 52            | 0.385              | 0.017         | 0.037      | 0.014        | 0.092         | 0.020       | 0.088          | 0.012        | 0.750        | 0.760         | 0.061       | 0.762        |
| 56            | 0.150              | 0.018         | 0.035      | 0.019        | 0.124         | 0.030       | 0.054          | 0.009        | 1.064        | 1.073         | 0.044       | 1.074        |
| 60            | -0.408             | 0.038         | 0.246      | 0.080        | 0.228         | 0.095       | 0.235          | 0.026        | 1.520        | 1.555         | 0.282       | 1.580        |
| 64            | -0.665             | 0.068         | 0.437      | 0.170        | 0.330         | 0.229       | 0.497          | 0.053        | 1.789        | 1.859         | 0.616       | 1.959        |
| 68            | -0.890             | 0.018         | 0.028      | 0.025        | 0.357         | 0.259       | 0.131          | 0.031        | 1.712        | 1.752         | 0.272       | 1.773        |

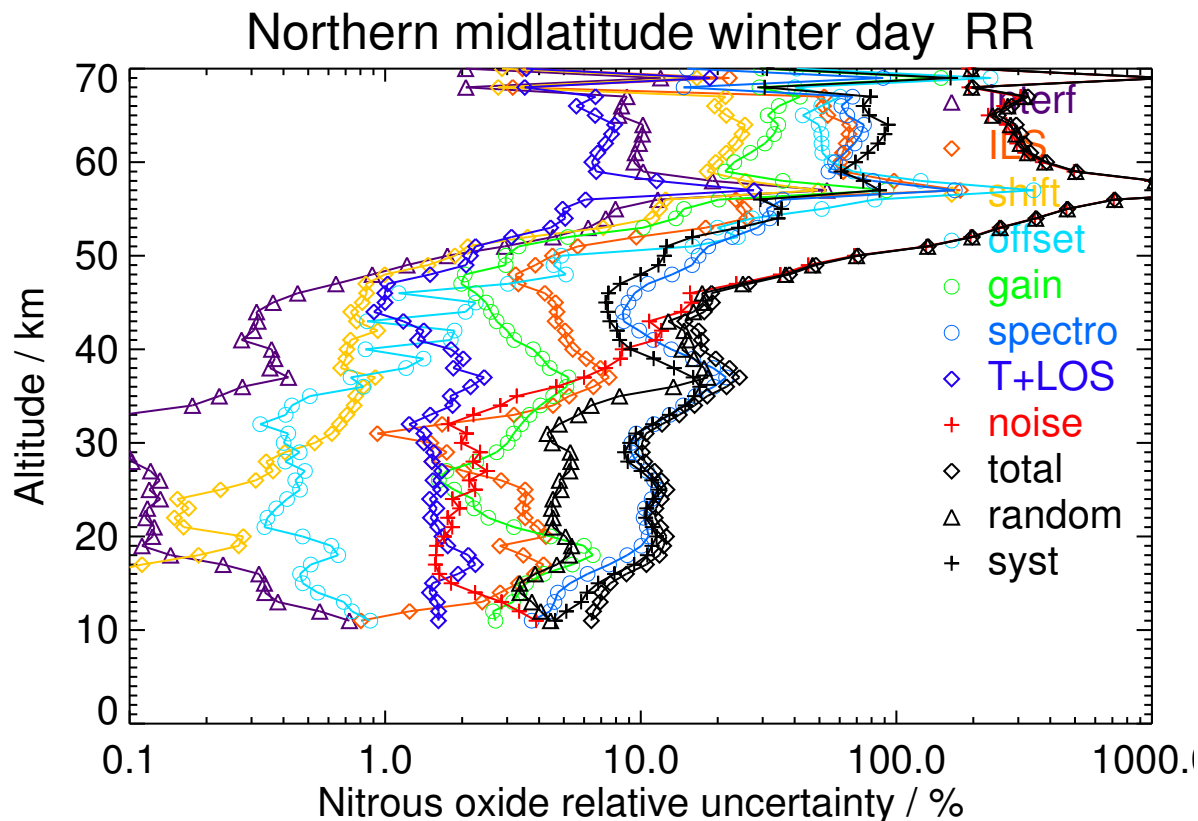

**Figure S179.** V8R\_N2O\_261 Northern midlatitude winter day



**Table S180.** Nitrous oxide error budget for Northern midlatitude winter night. All uncertainties are  $1\sigma$ .

| altitude<br>(km) | mean target<br>(ppbv) | interf<br>(ppbv) | ILS<br>(ppbv) | shift<br>(ppbv) | offset<br>(ppbv) | gain<br>(ppbv) | spectro<br>(ppbv) | T+LOS<br>(ppbv) | noise<br>(ppbv) | random<br>(ppbv) | syst<br>(ppbv) | total<br>(ppbv) |
|------------------|-----------------------|------------------|---------------|-----------------|------------------|----------------|-------------------|-----------------|-----------------|------------------|----------------|-----------------|
| 12               | 306.925               | 1.454            | 5.904         | 0.208           | 2.342            | 9.991          | 14.578            | 5.151           | 9.453           | 11.796           | 18.209         | 21.696          |
| 15               | 305.030               | 0.986            | 8.824         | 0.235           | 1.371            | 9.418          | 16.421            | 4.738           | 5.118           | 10.000           | 19.691         | 22.085          |
| 18               | 263.702               | 0.387            | 7.640         | 0.542           | 1.433            | 13.344         | 21.392            | 4.870           | 3.885           | 13.583           | 23.470         | 27.117          |
| 21               | 211.730               | 0.338            | 10.208        | 0.360           | 0.860            | 5.688          | 21.893            | 3.722           | 4.007           | 9.855            | 23.444         | 25.432          |
| 24               | 185.458               | 0.252            | 6.442         | 0.283           | 0.783            | 3.098          | 20.004            | 2.748           | 3.490           | 7.818            | 20.264         | 21.720          |
| 27               | 135.030               | 0.172            | 2.510         | 0.535           | 0.685            | 2.038          | 15.416            | 2.320           | 3.363           | 6.588            | 14.905         | 16.296          |
| 30               | 102.213               | 0.091            | 1.538         | 0.453           | 0.395            | 2.394          | 9.850             | 1.537           | 2.177           | 5.338            | 9.171          | 10.611          |
| 33               | 68.180                | 0.084            | 1.756         | 0.601           | 0.294            | 2.312          | 8.319             | 0.998           | 1.583           | 3.285            | 8.414          | 9.032           |
| 36               | 21.108                | 0.062            | 1.412         | 0.177           | 0.173            | 1.001          | 3.758             | 0.420           | 0.926           | 2.681            | 3.321          | 4.268           |
| 39               | 6.976                 | 0.021            | 0.523         | 0.053           | 0.098            | 0.348          | 1.052             | 0.124           | 0.526           | 1.057            | 0.830          | 1.344           |
| 42               | 4.368                 | 0.012            | 0.237         | 0.035           | 0.076            | 0.162          | 0.450             | 0.057           | 0.438           | 0.629            | 0.303          | 0.698           |
| 45               | 4.037                 | 0.013            | 0.167         | 0.034           | 0.076            | 0.113          | 0.333             | 0.035           | 0.481           | 0.559            | 0.281          | 0.625           |
| 48               | 2.381                 | 0.016            | 0.055         | 0.018           | 0.082            | 0.038          | 0.278             | 0.028           | 0.530           | 0.570            | 0.214          | 0.609           |
| 52               | 0.418                 | 0.018            | 0.028         | 0.013           | 0.093            | 0.011          | 0.084             | 0.012           | 0.713           | 0.721            | 0.070          | 0.725           |
| 56               | 0.212                 | 0.017            | 0.035         | 0.018           | 0.125            | 0.022          | 0.052             | 0.010           | 1.039           | 1.049            | 0.035          | 1.049           |
| 60               | 0.177                 | 0.048            | 0.276         | 0.096           | 0.224            | 0.093          | 0.263             | 0.032           | 1.505           | 1.538            | 0.339          | 1.575           |
| 64               | -0.091                | 0.086            | 0.509         | 0.209           | 0.329            | 0.234          | 0.582             | 0.062           | 1.773           | 1.861            | 0.705          | 1.990           |
| 68               | 0.418                 | 0.026            | 0.086         | 0.035           | 0.340            | 0.125          | 0.129             | 0.020           | 1.662           | 1.701            | 0.162          | 1.709           |

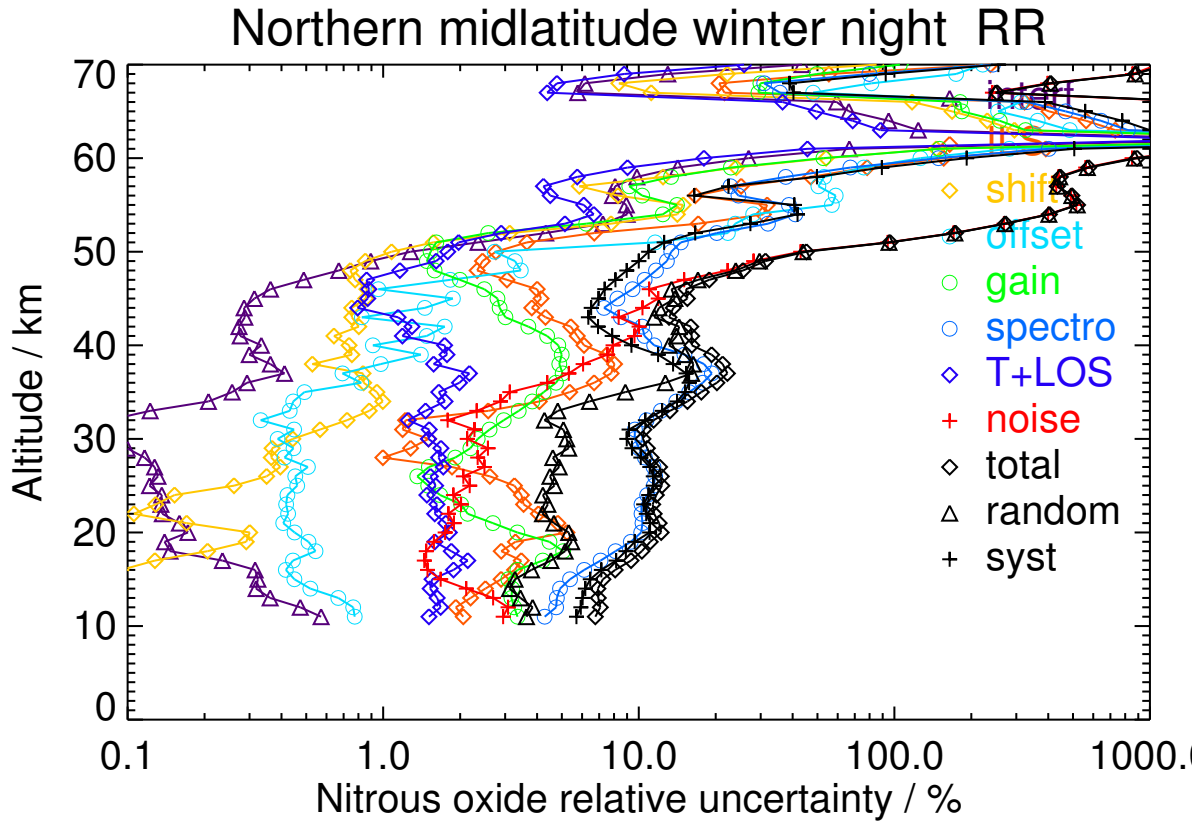

**Figure S180.** V8R\_N2O\_261 Northern midlatitude winter night

**Table S181.** Nitrous oxide error budget for Northern midlatitude spring day. All uncertainties are  $1\sigma$ .

| altitude<br>(km) | mean target<br>(ppbv) | interf<br>(ppbv) | ILS<br>(ppbv) | shift<br>(ppbv) | offset<br>(ppbv) | gain<br>(ppbv) | spectro<br>(ppbv) | T+LOS<br>(ppbv) | noise<br>(ppbv) | random<br>(ppbv) | syst<br>(ppbv) | total<br>(ppbv) |
|------------------|-----------------------|------------------|---------------|-----------------|------------------|----------------|-------------------|-----------------|-----------------|------------------|----------------|-----------------|
| 12               | 311.038               | 1.578            | 4.299         | 0.328           | 1.799            | 10.536         | 14.729            | 4.555           | 8.226           | 10.766           | 18.021         | 20.992          |
| 15               | 301.139               | 1.041            | 8.135         | 0.221           | 1.327            | 11.526         | 16.661            | 4.908           | 5.002           | 9.109            | 21.110         | 22.992          |
| 18               | 266.946               | 0.383            | 9.113         | 0.556           | 1.927            | 20.844         | 22.224            | 6.112           | 4.311           | 13.679           | 29.739         | 32.734          |
| 21               | 199.487               | 0.267            | 5.298         | 0.252           | 0.901            | 10.413         | 21.341            | 3.437           | 3.807           | 10.784           | 22.425         | 24.883          |
| 24               | 155.993               | 0.180            | 3.321         | 0.335           | 0.763            | 3.335          | 15.703            | 2.655           | 3.842           | 6.375            | 15.831         | 17.066          |
| 27               | 136.277               | 0.171            | 1.334         | 0.443           | 0.540            | 2.577          | 13.062            | 2.065           | 3.115           | 5.884            | 12.605         | 13.911          |
| 30               | 100.867               | 0.088            | 0.822         | 0.592           | 0.402            | 2.956          | 11.668            | 1.726           | 2.515           | 5.769            | 11.050         | 12.465          |
| 33               | 52.120                | 0.081            | 1.746         | 0.355           | 0.244            | 1.816          | 7.125             | 0.935           | 1.631           | 4.103            | 6.633          | 7.800           |
| 36               | 17.366                | 0.057            | 1.103         | 0.132           | 0.148            | 0.840          | 2.679             | 0.332           | 0.915           | 1.847            | 2.584          | 3.176           |
| 39               | 8.258                 | 0.032            | 0.516         | 0.052           | 0.088            | 0.453          | 1.047             | 0.109           | 0.546           | 1.155            | 0.746          | 1.375           |
| 42               | 5.430                 | 0.013            | 0.281         | 0.051           | 0.065            | 0.238          | 0.581             | 0.057           | 0.439           | 0.652            | 0.501          | 0.822           |
| 45               | 3.153                 | 0.012            | 0.086         | 0.022           | 0.059            | 0.082          | 0.287             | 0.032           | 0.442           | 0.497            | 0.224          | 0.545           |
| 48               | 2.536                 | 0.016            | 0.045         | 0.016           | 0.071            | 0.058          | 0.195             | 0.021           | 0.489           | 0.517            | 0.148          | 0.537           |
| 52               | 1.150                 | 0.018            | 0.036         | 0.009           | 0.075            | 0.022          | 0.125             | 0.016           | 0.627           | 0.639            | 0.094          | 0.645           |
| 56               | 0.570                 | 0.018            | 0.022         | 0.012           | 0.097            | 0.024          | 0.068             | 0.010           | 0.933           | 0.940            | 0.051          | 0.941           |
| 60               | 0.093                 | 0.020            | 0.078         | 0.020           | 0.168            | 0.039          | 0.074             | 0.012           | 1.258           | 1.272            | 0.080          | 1.275           |
| 64               | -0.152                | 0.041            | 0.178         | 0.064           | 0.301            | 0.155          | 0.205             | 0.024           | 1.649           | 1.688            | 0.251          | 1.707           |
| 68               | -0.367                | 0.046            | 0.196         | 0.068           | 0.322            | 0.173          | 0.217             | 0.027           | 1.653           | 1.697            | 0.284          | 1.720           |

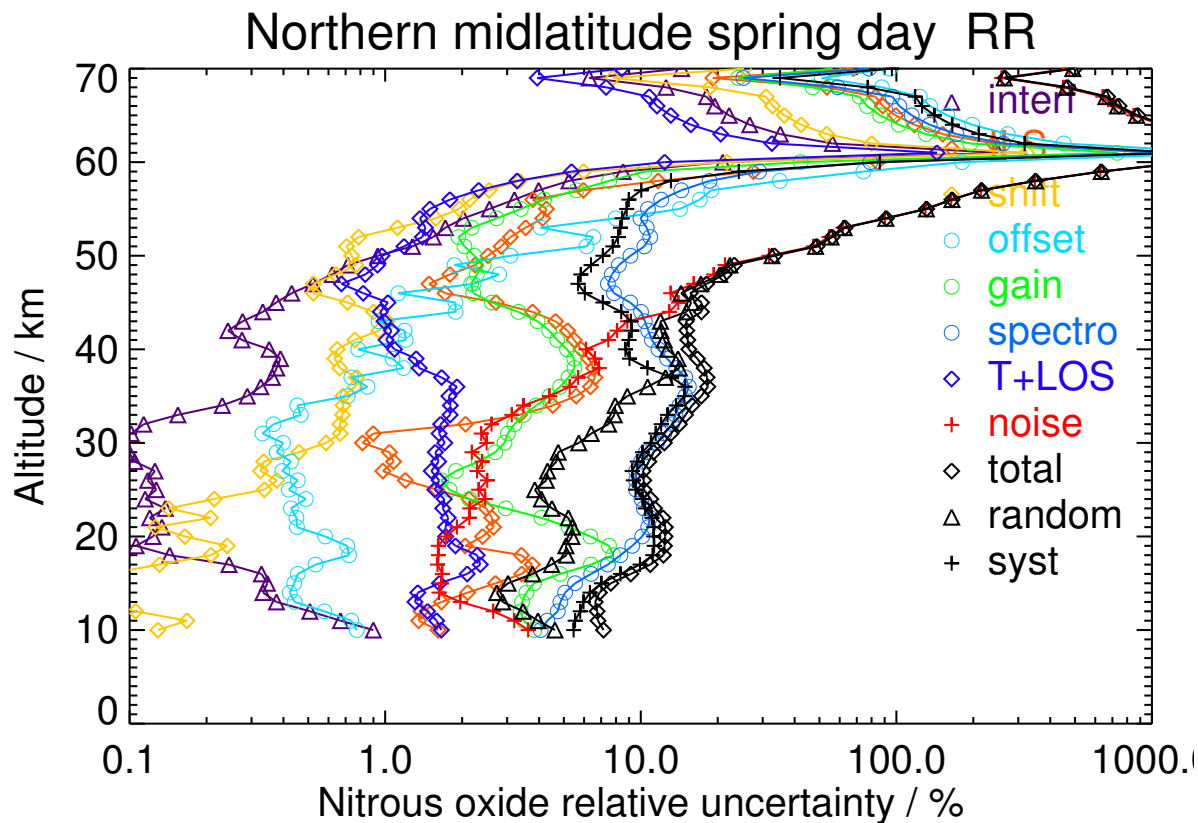

**Figure S181.** V8R\_N2O\_261 Northern midlatitude spring day

**Table S182.** Nitrous oxide error budget for Northern midlatitude spring night. All uncertainties are  $1\sigma$ .

| altitude<br>(km) | mean target<br>(ppbv) | interf<br>(ppbv) | ILS<br>(ppbv) | shift<br>(ppbv) | offset<br>(ppbv) | gain<br>(ppbv) | spectro<br>(ppbv) | T+LOS<br>(ppbv) | noise<br>(ppbv) | random<br>(ppbv) | syst<br>(ppbv) | total<br>(ppbv) |
|------------------|-----------------------|------------------|---------------|-----------------|------------------|----------------|-------------------|-----------------|-----------------|------------------|----------------|-----------------|
| 12               | 311.288               | 1.528            | 4.385         | 0.274           | 1.931            | 10.319         | 14.243            | 4.743           | 8.513           | 10.755           | 17.720         | 20.728          |
| 15               | 289.071               | 0.957            | 6.851         | 0.212           | 1.242            | 10.167         | 15.660            | 4.489           | 4.659           | 8.123            | 19.337         | 20.973          |
| 18               | 257.225               | 0.277            | 7.547         | 0.475           | 1.651            | 17.887         | 20.693            | 4.923           | 4.007           | 13.747           | 25.680         | 29.128          |
| 21               | 199.948               | 0.281            | 6.372         | 0.337           | 0.960            | 10.047         | 21.309            | 3.318           | 3.692           | 10.614           | 22.555         | 24.927          |
| 24               | 156.668               | 0.195            | 2.854         | 0.348           | 0.705            | 4.581          | 15.007            | 2.487           | 3.663           | 6.816            | 15.104         | 16.571          |
| 27               | 134.607               | 0.161            | 1.195         | 0.472           | 0.505            | 2.094          | 14.016            | 2.081           | 3.171           | 5.201            | 13.788         | 14.736          |
| 30               | 90.682                | 0.082            | 0.775         | 0.514           | 0.356            | 1.959          | 10.696            | 1.609           | 2.412           | 4.130            | 10.516         | 11.299          |
| 33               | 48.542                | 0.078            | 1.570         | 0.359           | 0.252            | 1.847          | 5.925             | 0.807           | 1.598           | 2.508            | 6.172          | 6.662           |
| 36               | 18.832                | 0.058            | 1.093         | 0.159           | 0.166            | 0.931          | 2.739             | 0.325           | 0.964           | 1.895            | 2.658          | 3.264           |
| 39               | 8.498                 | 0.033            | 0.511         | 0.065           | 0.098            | 0.478          | 1.034             | 0.112           | 0.570           | 1.087            | 0.854          | 1.383           |
| 42               | 5.575                 | 0.014            | 0.282         | 0.057           | 0.071            | 0.266          | 0.587             | 0.054           | 0.446           | 0.691            | 0.476          | 0.840           |
| 45               | 3.244                 | 0.012            | 0.097         | 0.023           | 0.066            | 0.092          | 0.332             | 0.033           | 0.453           | 0.528            | 0.247          | 0.583           |
| 48               | 2.328                 | 0.016            | 0.039         | 0.012           | 0.072            | 0.047          | 0.188             | 0.020           | 0.491           | 0.519            | 0.128          | 0.535           |
| 52               | 1.440                 | 0.019            | 0.032         | 0.009           | 0.086            | 0.023          | 0.116             | 0.014           | 0.662           | 0.672            | 0.098          | 0.679           |
| 56               | 0.531                 | 0.017            | 0.030         | 0.014           | 0.109            | 0.031          | 0.067             | 0.011           | 0.963           | 0.971            | 0.061          | 0.973           |
| 60               | 0.553                 | 0.020            | 0.084         | 0.019           | 0.171            | 0.030          | 0.074             | 0.013           | 1.274           | 1.289            | 0.077          | 1.291           |
| 64               | -0.059                | 0.039            | 0.184         | 0.059           | 0.300            | 0.146          | 0.190             | 0.024           | 1.654           | 1.693            | 0.238          | 1.710           |
| 68               | -0.334                | 0.045            | 0.214         | 0.071           | 0.326            | 0.170          | 0.225             | 0.024           | 1.664           | 1.711            | 0.283          | 1.735           |

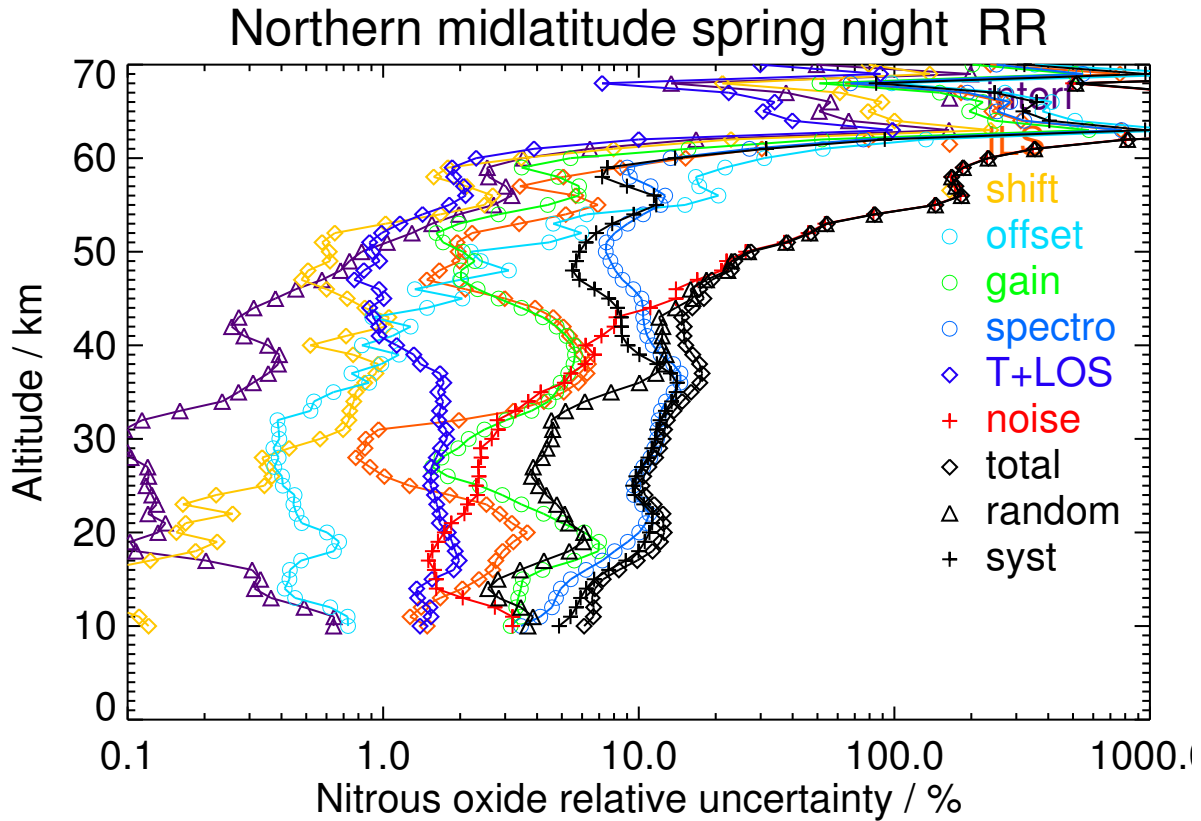

**Figure S182.** V8R\_N2O\_261 Northern midlatitude spring night

**Table S183.** Nitrous oxide error budget for Northern midlatitude summer day. All uncertainties are  $1\sigma$ .

| altitude (km) | mean target (ppbv) | interf (ppbv) | ILS (ppbv) | shift (ppbv) | offset (ppbv) | gain (ppbv) | spectro (ppbv) | T+LOS (ppbv) | noise (ppbv) | random (ppbv) | syst (ppbv) | total (ppbv) |
|---------------|--------------------|---------------|------------|--------------|---------------|-------------|----------------|--------------|--------------|---------------|-------------|--------------|
| 12            | 360.365            | 2.013         | 12.340     | 0.186        | 2.196         | 15.622      | 15.123         | 5.350        | 8.781        | 11.107        | 24.825      | 27.197       |
| 15            | 347.376            | 1.450         | 14.319     | 0.173        | 2.125         | 11.152      | 16.259         | 7.574        | 7.518        | 11.908        | 23.927      | 26.726       |
| 18            | 321.453            | 1.286         | 6.535      | 0.459        | 2.238         | 10.168      | 23.259         | 7.385        | 6.014        | 12.038        | 25.292      | 28.011       |
| 21            | 244.405            | 0.516         | 10.045     | 0.406        | 0.696         | 2.147       | 24.463         | 5.161        | 4.964        | 8.418         | 26.178      | 27.498       |
| 24            | 180.784            | 0.245         | 4.213      | 0.121        | 0.566         | 2.839       | 18.499         | 2.647        | 3.476        | 5.130         | 19.005      | 19.685       |
| 27            | 139.331            | 0.177         | 1.578      | 0.510        | 0.539         | 2.274       | 12.087         | 2.107        | 3.391        | 4.463         | 12.262      | 13.049       |
| 30            | 120.974            | 0.104         | 1.415      | 0.608        | 0.353         | 2.687       | 11.859         | 1.638        | 2.345        | 3.325         | 12.144      | 12.591       |
| 33            | 69.882             | 0.070         | 1.971      | 0.623        | 0.269         | 2.060       | 7.830          | 0.960        | 1.751        | 2.782         | 8.134       | 8.596        |
| 36            | 36.690             | 0.099         | 1.512      | 0.248        | 0.210         | 1.452       | 4.104          | 0.467        | 1.154        | 1.569         | 4.521       | 4.785        |
| 39            | 15.283             | 0.045         | 0.806      | 0.106        | 0.123         | 0.705       | 1.966          | 0.215        | 0.728        | 1.011         | 2.143       | 2.370        |
| 42            | 6.788              | 0.014         | 0.332      | 0.065        | 0.081         | 0.270       | 0.668          | 0.085        | 0.500        | 0.686         | 0.653       | 0.948        |
| 45            | 4.996              | 0.013         | 0.194      | 0.048        | 0.071         | 0.160       | 0.420          | 0.048        | 0.468        | 0.572         | 0.376       | 0.685        |
| 48            | 3.257              | 0.016         | 0.109      | 0.036        | 0.075         | 0.100       | 0.269          | 0.034        | 0.489        | 0.542         | 0.218       | 0.584        |
| 52            | 2.940              | 0.018         | 0.053      | 0.019        | 0.078         | 0.056       | 0.226          | 0.027        | 0.601        | 0.638         | 0.141       | 0.653        |
| 56            | 1.979              | 0.020         | 0.039      | 0.022        | 0.097         | 0.051       | 0.184          | 0.024        | 0.886        | 0.900         | 0.151       | 0.913        |
| 60            | 0.516              | 0.030         | 0.129      | 0.039        | 0.169         | 0.062       | 0.127          | 0.020        | 1.276        | 1.292         | 0.159       | 1.302        |
| 64            | -0.432             | 0.076         | 0.359      | 0.150        | 0.291         | 0.277       | 0.421          | 0.034        | 1.677        | 1.718         | 0.598       | 1.819        |
| 68            | -0.514             | 0.080         | 0.390      | 0.192        | 0.292         | 0.351       | 0.558          | 0.039        | 1.617        | 1.663         | 0.753       | 1.825        |

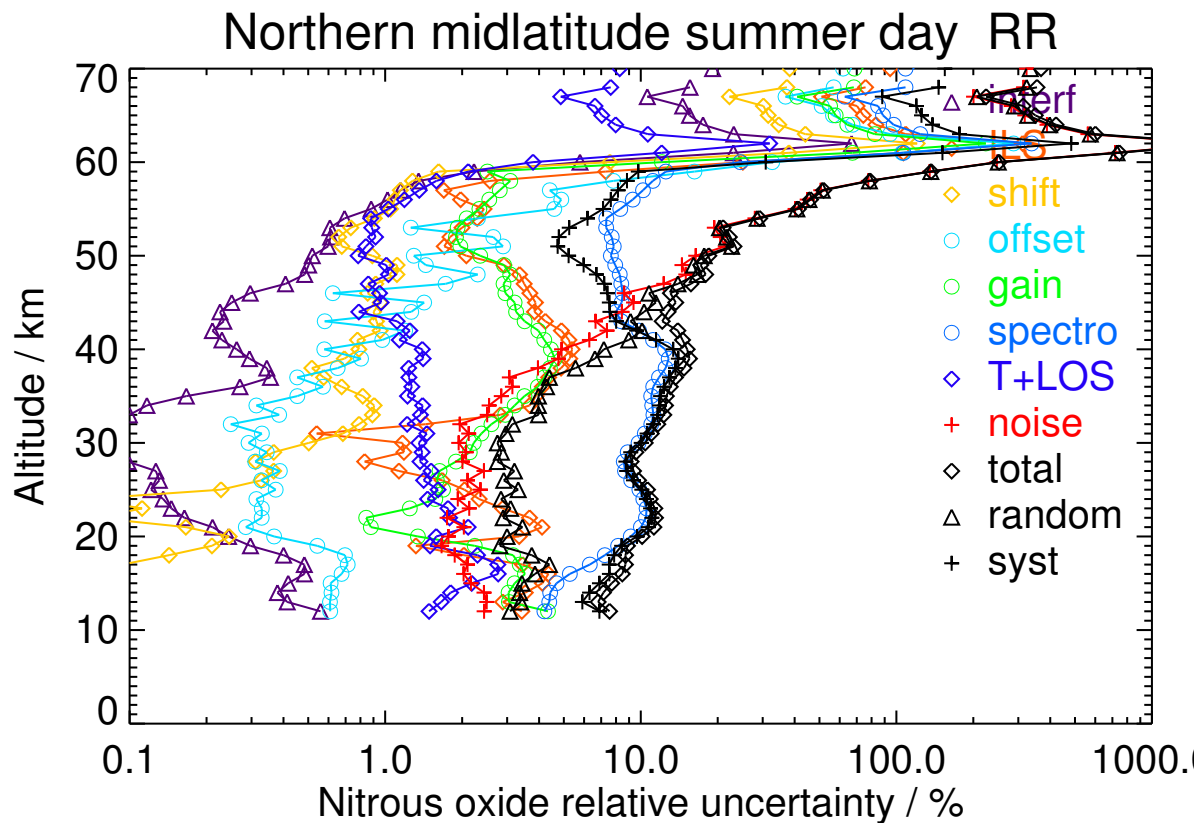

**Figure S183.** V8R\_N2O\_261 Northern midlatitude summer day

**Table S184.** Nitrous oxide error budget for Northern midlatitude summer night. All uncertainties are  $1\sigma$ .

| altitude (km) | mean target (ppbv) | interf (ppbv) | ILS (ppbv) | shift (ppbv) | offset (ppbv) | gain (ppbv) | spectro (ppbv) | T+LOS (ppbv) | noise (ppbv) | random (ppbv) | syst (ppbv) | total (ppbv) |
|---------------|--------------------|---------------|------------|--------------|---------------|-------------|----------------|--------------|--------------|---------------|-------------|--------------|
| 12            | 338.464            | 2.035         | 5.770      | 0.250        | 2.383         | 11.591      | 14.389         | 6.609        | 10.195       | 13.659        | 18.590      | 23.069       |
| 15            | 334.018            | 1.384         | 8.782      | 0.154        | 1.811         | 8.183       | 13.934         | 6.299        | 7.428        | 12.401        | 16.869      | 20.936       |
| 18            | 302.007            | 0.997         | 5.411      | 0.517        | 1.008         | 4.774       | 20.713         | 4.591        | 5.040        | 9.997         | 20.734      | 23.018       |
| 21            | 242.122            | 0.532         | 11.420     | 0.388        | 0.880         | 1.991       | 24.884         | 4.994        | 4.621        | 7.869         | 27.188      | 28.303       |
| 24            | 181.383            | 0.230         | 4.431      | 0.148        | 0.606         | 2.759       | 19.020         | 2.912        | 3.613        | 5.368         | 19.550      | 20.273       |
| 27            | 139.442            | 0.179         | 1.530      | 0.528        | 0.511         | 2.262       | 12.844         | 2.177        | 3.183        | 4.408         | 12.978      | 13.706       |
| 30            | 109.158            | 0.116         | 1.244      | 0.670        | 0.365         | 2.152       | 10.774         | 1.672        | 2.351        | 3.415         | 10.933      | 11.454       |
| 33            | 65.111             | 0.085         | 1.618      | 0.632        | 0.271         | 1.845       | 6.669          | 0.935        | 1.695        | 2.844         | 6.829       | 7.397        |
| 36            | 35.085             | 0.099         | 1.472      | 0.315        | 0.195         | 1.225       | 3.874          | 0.476        | 1.132        | 1.797         | 4.135       | 4.508        |
| 39            | 13.901             | 0.050         | 0.675      | 0.093        | 0.118         | 0.625       | 1.619          | 0.200        | 0.714        | 0.972         | 1.760       | 2.010        |
| 42            | 7.759              | 0.016         | 0.381      | 0.058        | 0.082         | 0.331       | 0.733          | 0.080        | 0.506        | 0.800         | 0.651       | 1.031        |
| 45            | 5.496              | 0.013         | 0.191      | 0.046        | 0.072         | 0.175       | 0.422          | 0.045        | 0.470        | 0.579         | 0.374       | 0.690        |
| 48            | 4.746              | 0.017         | 0.102      | 0.037        | 0.076         | 0.122       | 0.322          | 0.038        | 0.479        | 0.552         | 0.249       | 0.605        |
| 52            | 3.534              | 0.019         | 0.090      | 0.026        | 0.082         | 0.082       | 0.293          | 0.033        | 0.616        | 0.665         | 0.216       | 0.699        |
| 56            | 1.642              | 0.019         | 0.044      | 0.020        | 0.102         | 0.045       | 0.186          | 0.026        | 0.906        | 0.923         | 0.138       | 0.933        |
| 60            | 1.028              | 0.025         | 0.107      | 0.023        | 0.167         | 0.032       | 0.113          | 0.020        | 1.252        | 1.268         | 0.118       | 1.274        |
| 64            | 0.609              | 0.068         | 0.328      | 0.106        | 0.288         | 0.175       | 0.301          | 0.029        | 1.655        | 1.693         | 0.449       | 1.751        |
| 68            | -0.043             | 0.077         | 0.354      | 0.131        | 0.296         | 0.209       | 0.365          | 0.027        | 1.608        | 1.650         | 0.525       | 1.731        |

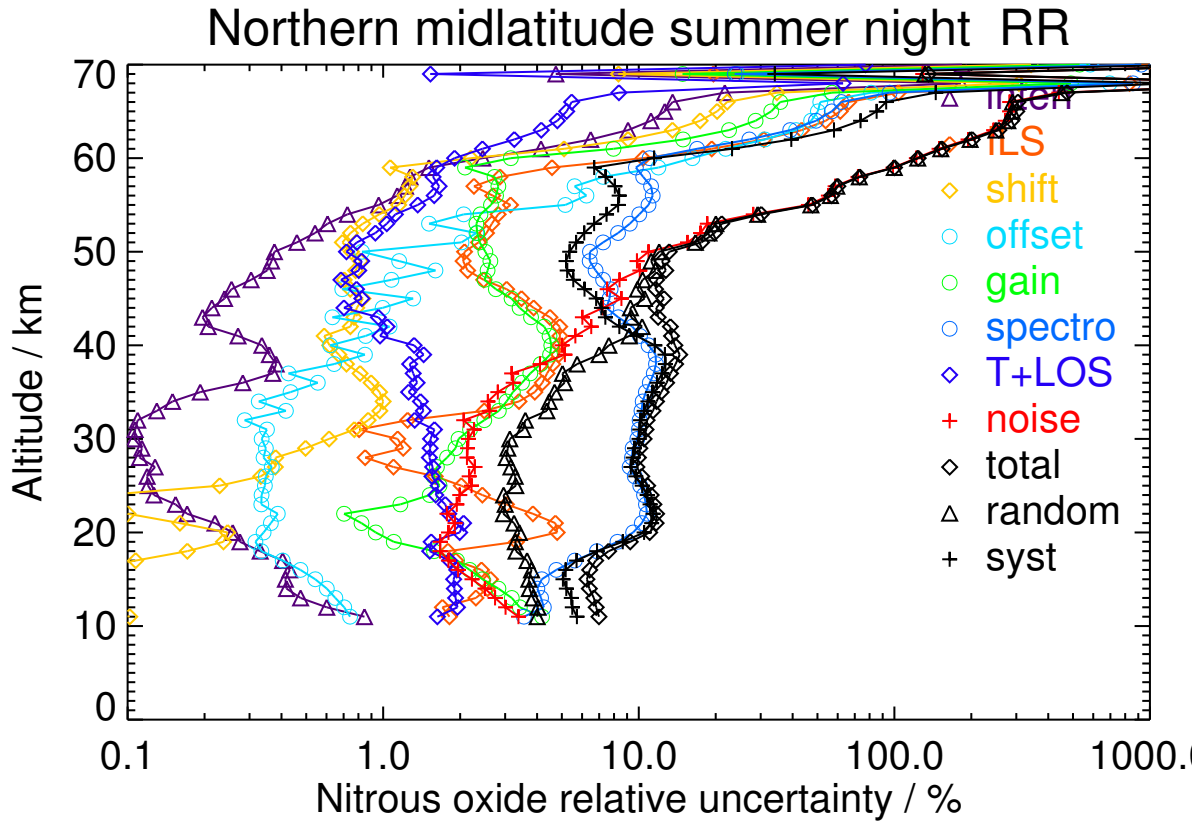

**Figure S184.** V8R\_N2O\_261 Northern midlatitude summer night

**Table S185.** Nitrous oxide error budget for Northern midlatitude autumn day. All uncertainties are  $1\sigma$ .

| altitude<br>(km) | mean target<br>(ppbv) | interf<br>(ppbv) | ILS<br>(ppbv) | shift<br>(ppbv) | offset<br>(ppbv) | gain<br>(ppbv) | spectro<br>(ppbv) | T+LOS<br>(ppbv) | noise<br>(ppbv) | random<br>(ppbv) | syst<br>(ppbv) | total<br>(ppbv) |
|------------------|-----------------------|------------------|---------------|-----------------|------------------|----------------|-------------------|-----------------|-----------------|------------------|----------------|-----------------|
| 12               | 344.158               | 1.574            | 8.281         | 0.154           | 2.119            | 14.636         | 13.921            | 4.762           | 7.906           | 9.996            | 21.653         | 23.849          |
| 15               | 327.134               | 1.237            | 11.649        | 0.147           | 2.262            | 11.293         | 16.102            | 7.628           | 8.388           | 13.232           | 21.969         | 25.647          |
| 18               | 310.971               | 0.778            | 4.328         | 0.455           | 1.520            | 10.296         | 23.201            | 5.717           | 4.908           | 10.278           | 24.846         | 26.888          |
| 21               | 238.969               | 0.407            | 12.142        | 0.521           | 0.918            | 2.618          | 26.319            | 4.673           | 4.565           | 7.984            | 28.761         | 29.848          |
| 24               | 180.451               | 0.239            | 6.245         | 0.306           | 0.811            | 1.951          | 19.489            | 2.888           | 3.563           | 6.077            | 20.188         | 21.083          |
| 27               | 137.469               | 0.158            | 2.947         | 0.515           | 0.627            | 1.991          | 14.675            | 2.316           | 3.665           | 5.186            | 14.852         | 15.732          |
| 30               | 104.144               | 0.095            | 0.924         | 0.521           | 0.352            | 1.957          | 10.650            | 1.588           | 2.500           | 3.717            | 10.652         | 11.282          |
| 33               | 73.126                | 0.079            | 0.977         | 0.641           | 0.317            | 1.788          | 7.327             | 0.896           | 2.066           | 3.353            | 7.224          | 7.964           |
| 36               | 48.746                | 0.097            | 1.399         | 0.411           | 0.264            | 1.654          | 4.752             | 0.517           | 1.511           | 2.323            | 4.967          | 5.484           |
| 39               | 28.920                | 0.086            | 1.198         | 0.171           | 0.203            | 1.358          | 2.781             | 0.297           | 1.104           | 1.728            | 3.068          | 3.521           |
| 42               | 19.480                | 0.037            | 0.934         | 0.105           | 0.143            | 0.903          | 1.852             | 0.190           | 0.861           | 1.374            | 2.010          | 2.435           |
| 45               | 8.943                 | 0.017            | 0.494         | 0.083           | 0.098            | 0.304          | 1.016             | 0.105           | 0.696           | 0.861            | 1.068          | 1.371           |
| 48               | 4.770                 | 0.017            | 0.178         | 0.034           | 0.094            | 0.085          | 0.408             | 0.052           | 0.650           | 0.707            | 0.375          | 0.800           |
| 52               | 3.057                 | 0.020            | 0.070         | 0.019           | 0.098            | 0.042          | 0.227             | 0.030           | 0.793           | 0.809            | 0.210          | 0.836           |
| 56               | 1.246                 | 0.020            | 0.030         | 0.017           | 0.115            | 0.029          | 0.138             | 0.020           | 1.079           | 1.089            | 0.117          | 1.096           |
| 60               | 0.534                 | 0.025            | 0.105         | 0.027           | 0.196            | 0.050          | 0.098             | 0.018           | 1.424           | 1.440            | 0.129          | 1.446           |
| 64               | -0.075                | 0.048            | 0.217         | 0.079           | 0.314            | 0.165          | 0.232             | 0.028           | 1.760           | 1.796            | 0.328          | 1.826           |
| 68               | -0.509                | 0.045            | 0.194         | 0.075           | 0.325            | 0.173          | 0.222             | 0.025           | 1.706           | 1.744            | 0.313          | 1.772           |

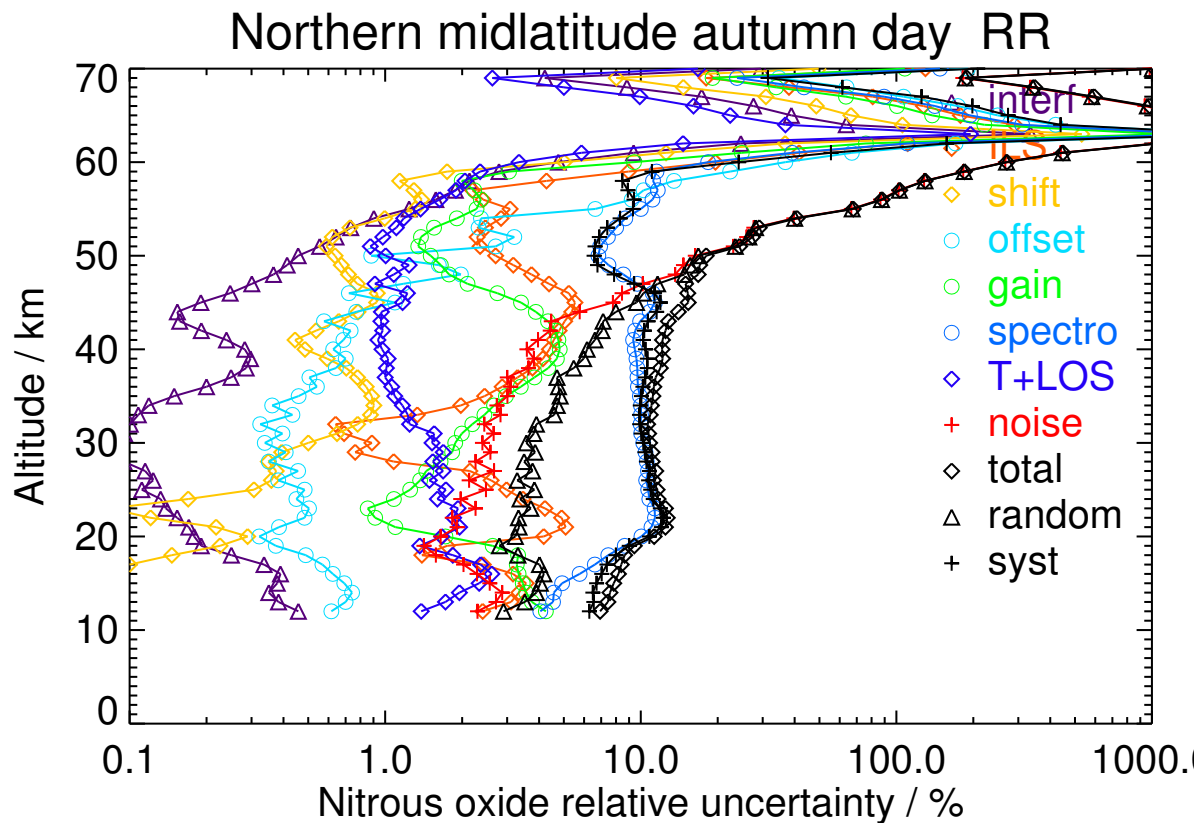

**Figure S185.** V8R\_N2O\_261 Northern midlatitude autumn day

**Table S186.** Nitrous oxide error budget for Northern midlatitude autumn night. All uncertainties are  $1\sigma$ .

| altitude (km) | mean target (ppbv) | interf (ppbv) | ILS (ppbv) | shift (ppbv) | offset (ppbv) | gain (ppbv) | spectro (ppbv) | T+LOS (ppbv) | noise (ppbv) | random (ppbv) | syst (ppbv) | total (ppbv) |
|---------------|--------------------|---------------|------------|--------------|---------------|-------------|----------------|--------------|--------------|---------------|-------------|--------------|
| 12            | 324.141            | 1.252         | 12.150     | 0.086        | 2.559         | 14.851      | 14.028         | 5.902        | 9.476        | 11.862        | 23.601      | 26.414       |
| 15            | 328.441            | 1.083         | 10.240     | 0.136        | 2.056         | 10.552      | 15.242         | 7.332        | 7.489        | 12.447        | 20.220      | 23.744       |
| 18            | 305.189            | 0.691         | 3.935      | 0.489        | 1.383         | 10.192      | 21.057         | 4.944        | 4.467        | 9.762         | 22.682      | 24.693       |
| 21            | 232.770            | 0.391         | 8.725      | 0.439        | 0.922         | 7.039       | 24.555         | 4.134        | 4.355        | 10.120        | 25.758      | 27.675       |
| 24            | 171.535            | 0.216         | 5.832      | 0.338        | 0.714         | 2.397       | 18.822         | 2.783        | 3.628        | 6.914         | 19.178      | 20.386       |
| 27            | 132.679            | 0.149         | 3.078      | 0.494        | 0.572         | 2.266       | 14.269         | 2.193        | 3.466        | 5.401         | 14.369      | 15.350       |
| 30            | 95.384             | 0.090         | 1.082      | 0.512        | 0.359         | 2.040       | 10.767         | 1.557        | 2.436        | 4.281         | 10.568      | 11.402       |
| 33            | 63.857             | 0.086         | 0.962      | 0.610        | 0.313         | 1.647       | 7.117          | 0.895        | 1.958        | 3.786         | 6.713       | 7.708        |
| 36            | 38.945             | 0.087         | 1.161      | 0.410        | 0.245         | 1.452       | 4.386          | 0.466        | 1.380        | 2.778         | 4.163       | 5.005        |
| 39            | 23.661             | 0.071         | 1.114      | 0.158        | 0.180         | 1.215       | 2.767          | 0.257        | 0.975        | 2.220         | 2.553       | 3.384        |
| 42            | 14.068             | 0.030         | 0.816      | 0.081        | 0.121         | 0.727       | 1.596          | 0.142        | 0.743        | 1.409         | 1.534       | 2.082        |
| 45            | 8.363              | 0.015         | 0.397      | 0.065        | 0.092         | 0.263       | 0.782          | 0.078        | 0.638        | 0.811         | 0.778       | 1.124        |
| 48            | 4.694              | 0.018         | 0.183      | 0.031        | 0.089         | 0.088       | 0.402          | 0.045        | 0.602        | 0.639         | 0.410       | 0.759        |
| 52            | 2.650              | 0.020         | 0.064      | 0.015        | 0.096         | 0.037       | 0.175          | 0.024        | 0.751        | 0.763         | 0.172       | 0.782        |
| 56            | 1.664              | 0.018         | 0.035      | 0.016        | 0.114         | 0.034       | 0.130          | 0.019        | 1.044        | 1.053         | 0.120       | 1.060        |
| 60            | 0.450              | 0.021         | 0.070      | 0.012        | 0.181         | 0.029       | 0.075          | 0.016        | 1.359        | 1.373         | 0.082       | 1.375        |
| 64            | -0.088             | 0.038         | 0.156      | 0.045        | 0.305         | 0.131       | 0.147          | 0.022        | 1.713        | 1.745         | 0.226       | 1.759        |
| 68            | -0.225             | 0.043         | 0.184      | 0.057        | 0.321         | 0.152       | 0.176          | 0.024        | 1.686        | 1.723         | 0.269       | 1.744        |

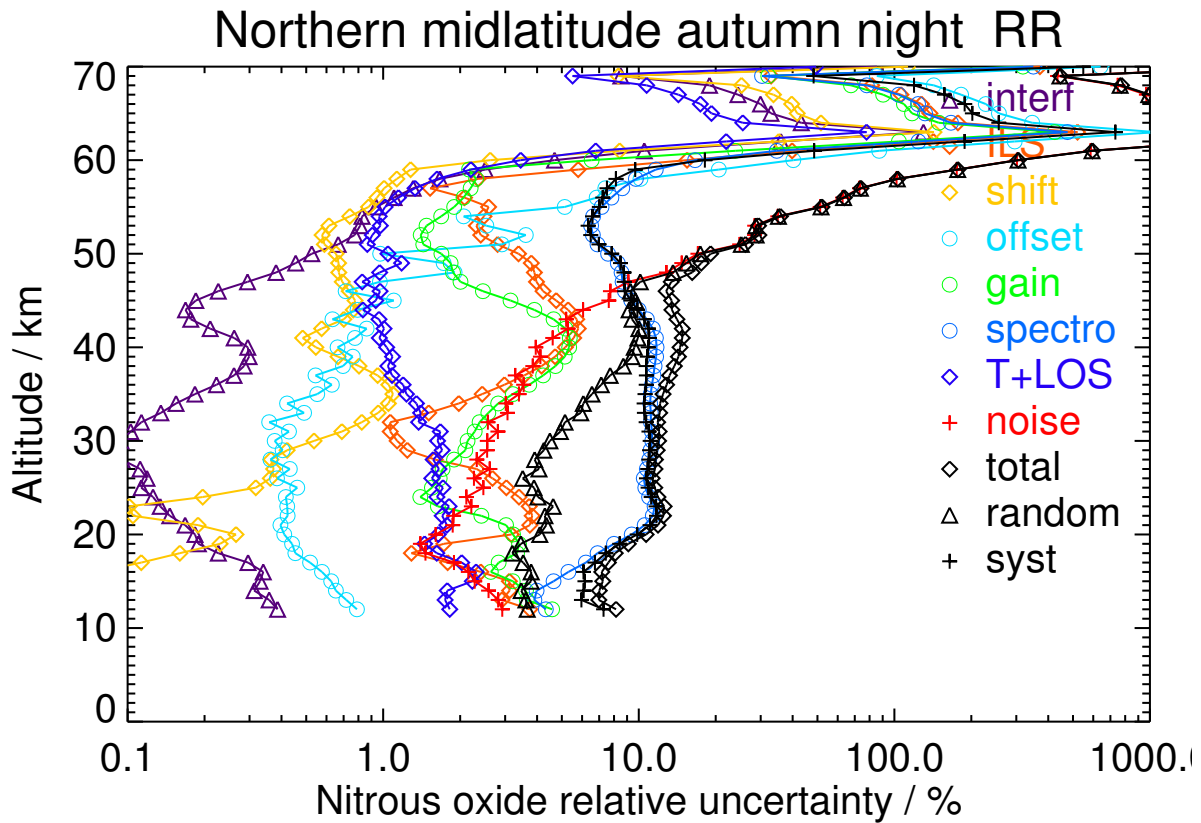

**Figure S186.** V8R\_N2O\_261 Northern midlatitude autumn night



**Table S187.** Nitrous oxide error budget for Tropics day. All uncertainties are  $1\sigma$ .

| altitude (km) | mean target (ppbv) | interf (ppbv) | ILS (ppbv) | shift (ppbv) | offset (ppbv) | gain (ppbv) | spectro (ppbv) | T+LOS (ppbv) | noise (ppbv) | random (ppbv) | syst (ppbv) | total (ppbv) |
|---------------|--------------------|---------------|------------|--------------|---------------|-------------|----------------|--------------|--------------|---------------|-------------|--------------|
| 12            | 353.476            | 1.312         | 6.679      | 0.104        | 2.112         | 13.970      | 16.827         | 5.927        | 8.282        | 11.445        | 22.402      | 25.156       |
| 15            | 362.531            | 1.682         | 13.452     | 0.347        | 2.462         | 13.507      | 15.378         | 10.299       | 8.534        | 14.881        | 23.798      | 28.068       |
| 18            | 335.991            | 1.387         | 7.641      | 0.262        | 2.417         | 8.962       | 17.210         | 8.399        | 7.747        | 12.611        | 20.352      | 23.943       |
| 21            | 292.704            | 0.811         | 5.958      | 0.256        | 0.855         | 3.871       | 23.017         | 5.916        | 6.093        | 9.396         | 23.781      | 25.570       |
| 24            | 266.547            | 0.216         | 1.451      | 0.263        | 0.676         | 5.495       | 24.578         | 3.357        | 4.244        | 7.147         | 24.802      | 25.811       |
| 27            | 252.712            | 0.171         | 0.881      | 0.297        | 0.651         | 4.409       | 21.062         | 3.184        | 3.926        | 5.919         | 21.328      | 22.134       |
| 30            | 213.922            | 0.113         | 1.503      | 0.651        | 0.537         | 4.490       | 18.259         | 2.713        | 3.018        | 4.805         | 18.706      | 19.313       |
| 33            | 161.269            | 0.136         | 3.249      | 1.262        | 0.417         | 3.720       | 13.920         | 1.705        | 2.261        | 4.534         | 14.402      | 15.099       |
| 36            | 87.610             | 0.130         | 2.726      | 0.924        | 0.250         | 2.506       | 8.661          | 0.978        | 1.475        | 3.083         | 9.126       | 9.633        |
| 39            | 38.916             | 0.109         | 1.359      | 0.336        | 0.184         | 1.614       | 4.056          | 0.422        | 0.957        | 1.880         | 4.315       | 4.707        |
| 42            | 18.972             | 0.045         | 0.700      | 0.137        | 0.119         | 0.918       | 2.137          | 0.208        | 0.659        | 1.495         | 2.043       | 2.532        |
| 45            | 6.802              | 0.017         | 0.181      | 0.080        | 0.069         | 0.224       | 0.757          | 0.092        | 0.495        | 0.625         | 0.728       | 0.960        |
| 48            | 4.097              | 0.016         | 0.081      | 0.016        | 0.062         | 0.096       | 0.291          | 0.045        | 0.492        | 0.524         | 0.273       | 0.591        |
| 52            | 1.170              | 0.016         | 0.044      | 0.014        | 0.048         | 0.028       | 0.169          | 0.026        | 0.561        | 0.572         | 0.151       | 0.591        |
| 56            | 0.377              | 0.019         | 0.061      | 0.028        | 0.072         | 0.038       | 0.080          | 0.010        | 0.777        | 0.783         | 0.089       | 0.788        |
| 60            | -0.027             | 0.024         | 0.111      | 0.035        | 0.154         | 0.071       | 0.113          | 0.013        | 1.121        | 1.135         | 0.159       | 1.146        |
| 64            | -0.587             | 0.071         | 0.454      | 0.187        | 0.287         | 0.324       | 0.530          | 0.044        | 1.609        | 1.663         | 0.736       | 1.818        |
| 68            | -0.809             | 0.084         | 0.570      | 0.237        | 0.309         | 0.402       | 0.664          | 0.056        | 1.623        | 1.703         | 0.908       | 1.930        |

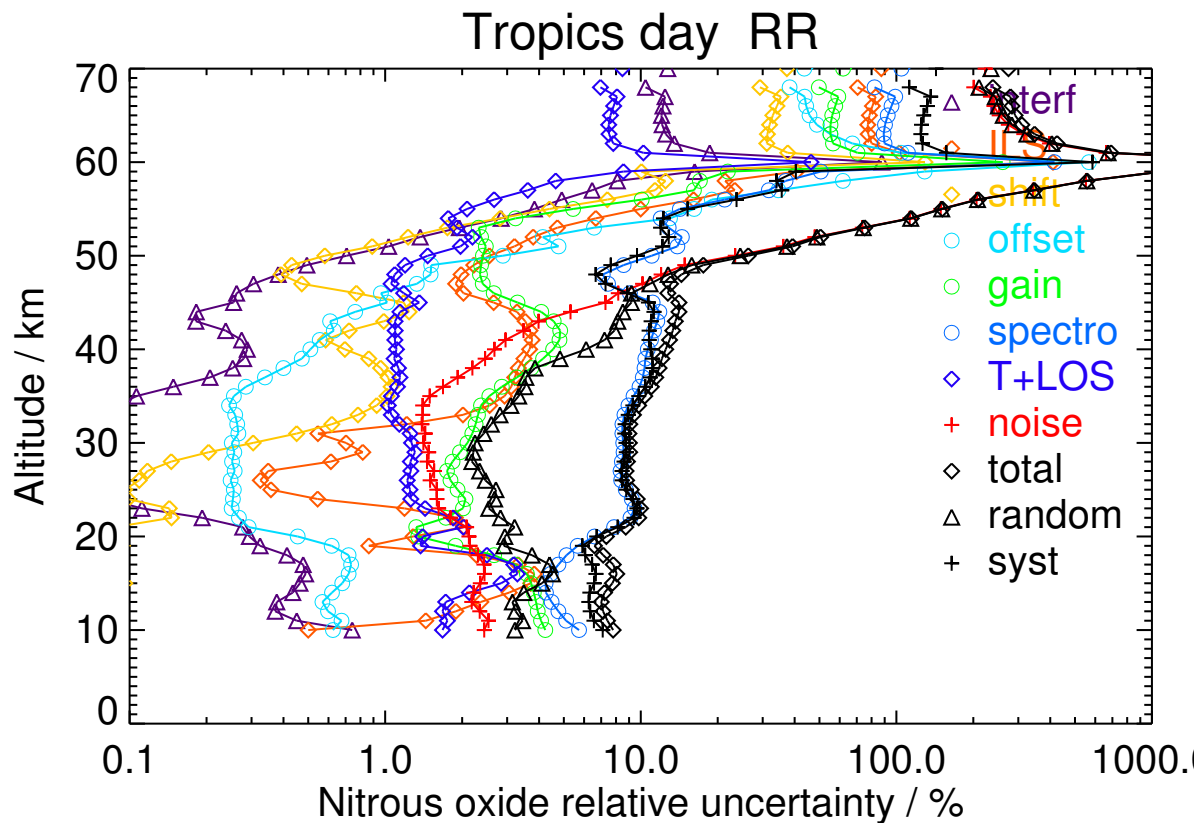

**Figure S187.** V8R\_N2O\_261 Tropics day



**Table S188.** Nitrous oxide error budget for Tropics night. All uncertainties are  $1\sigma$ .

| altitude (km) | mean target (ppbv) | interf (ppbv) | ILS (ppbv) | shift (ppbv) | offset (ppbv) | gain (ppbv) | spectro (ppbv) | T+LOS (ppbv) | noise (ppbv) | random (ppbv) | syst (ppbv) | total (ppbv) |
|---------------|--------------------|---------------|------------|--------------|---------------|-------------|----------------|--------------|--------------|---------------|-------------|--------------|
| 12            | 354.034            | 1.376         | 6.005      | 0.081        | 2.092         | 14.059      | 17.448         | 6.279        | 8.554        | 11.678        | 22.818      | 25.633       |
| 15            | 363.436            | 1.793         | 12.141     | 0.289        | 2.446         | 12.790      | 15.628         | 11.592       | 8.871        | 15.735        | 23.020      | 27.885       |
| 18            | 338.685            | 1.276         | 6.946      | 0.298        | 2.324         | 8.062       | 17.173         | 8.843        | 7.866        | 12.686        | 19.860      | 23.566       |
| 21            | 293.073            | 0.838         | 6.344      | 0.377        | 0.875         | 3.662       | 24.871         | 6.368        | 6.287        | 9.725         | 25.678      | 27.458       |
| 24            | 267.762            | 0.183         | 1.240      | 0.156        | 0.580         | 6.093       | 22.811         | 3.589        | 4.240        | 6.855         | 23.308      | 24.296       |
| 27            | 247.522            | 0.150         | 1.009      | 0.248        | 0.660         | 4.563       | 21.556         | 3.360        | 3.826        | 5.943         | 21.855      | 22.648       |
| 30            | 214.694            | 0.097         | 2.003      | 0.565        | 0.517         | 4.213       | 17.964         | 2.967        | 3.051        | 4.952         | 18.402      | 19.057       |
| 33            | 164.095            | 0.114         | 3.271      | 1.108        | 0.405         | 3.802       | 14.363         | 1.847        | 2.264        | 4.247         | 14.945      | 15.536       |
| 36            | 87.405             | 0.125         | 3.364      | 0.943        | 0.252         | 2.490       | 8.721          | 1.036        | 1.517        | 3.109         | 9.394       | 9.895        |
| 39            | 40.410             | 0.109         | 1.625      | 0.278        | 0.188         | 1.645       | 4.141          | 0.464        | 0.991        | 1.782         | 4.543       | 4.880        |
| 42            | 17.814             | 0.037         | 0.695      | 0.155        | 0.115         | 0.886       | 2.127          | 0.212        | 0.663        | 1.368         | 2.108       | 2.513        |
| 45            | 6.334              | 0.015         | 0.120      | 0.053        | 0.075         | 0.154       | 0.693          | 0.087        | 0.506        | 0.619         | 0.639       | 0.890        |
| 48            | 3.421              | 0.015         | 0.066      | 0.017        | 0.070         | 0.078       | 0.251          | 0.042        | 0.512        | 0.527         | 0.255       | 0.586        |
| 52            | 1.057              | 0.016         | 0.032      | 0.011        | 0.054         | 0.021       | 0.132          | 0.022        | 0.563        | 0.573         | 0.108       | 0.583        |
| 56            | 0.443              | 0.019         | 0.052      | 0.026        | 0.073         | 0.035       | 0.081          | 0.011        | 0.773        | 0.779         | 0.088       | 0.784        |
| 60            | -0.302             | 0.023         | 0.107      | 0.033        | 0.152         | 0.068       | 0.109          | 0.012        | 1.127        | 1.140         | 0.152       | 1.150        |
| 64            | -0.888             | 0.067         | 0.446      | 0.182        | 0.284         | 0.322       | 0.521          | 0.044        | 1.616        | 1.663         | 0.736       | 1.819        |
| 68            | -1.088             | 0.084         | 0.603      | 0.253        | 0.304         | 0.428       | 0.712          | 0.060        | 1.624        | 1.693         | 0.996       | 1.964        |

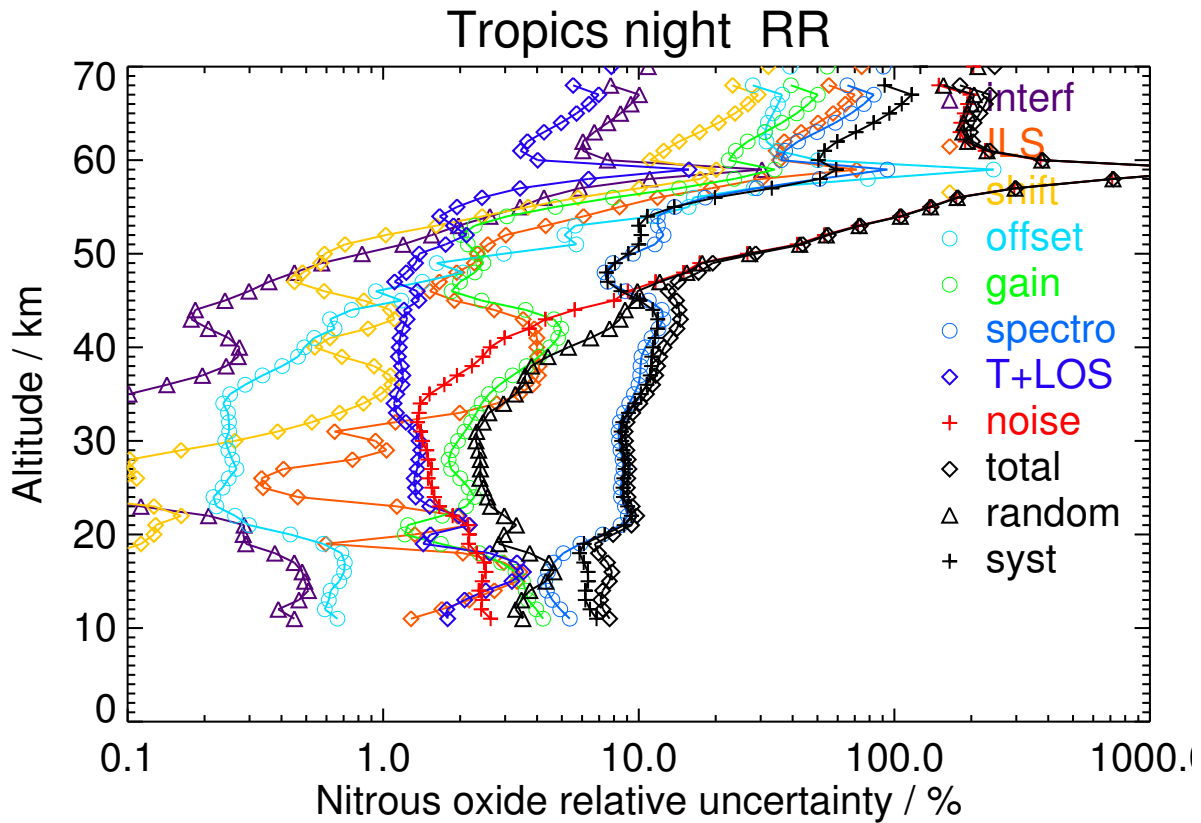

**Figure S188.** V8R\_N2O\_261 Tropics night

**Table S189.** Nitrous oxide error budget for Southern midlatitude winter day. All uncertainties are  $1\sigma$ .

| altitude (km) | mean target (ppbv) | interf (ppbv) | ILS (ppbv) | shift (ppbv) | offset (ppbv) | gain (ppbv) | spectro (ppbv) | T+LOS (ppbv) | noise (ppbv) | random (ppbv) | syst (ppbv) | total (ppbv) |
|---------------|--------------------|---------------|------------|--------------|---------------|-------------|----------------|--------------|--------------|---------------|-------------|--------------|
| 9             | 342.298            | 4.523         | 3.460      | 0.381        | 2.959         | 12.739      | 15.390         | 6.545        | 12.340       | 15.332        | 20.013      | 25.211       |
| 12            | 314.411            | 1.162         | 5.076      | 0.248        | 1.484         | 10.409      | 13.236         | 4.091        | 7.058        | 9.356         | 17.086      | 19.480       |
| 15            | 298.225            | 0.843         | 5.271      | 0.303        | 1.395         | 8.953       | 16.663         | 5.198        | 5.347        | 9.166         | 18.972      | 21.071       |
| 18            | 265.215            | 0.320         | 4.914      | 0.543        | 1.081         | 14.052      | 23.286         | 5.105        | 4.513        | 10.503        | 26.487      | 28.493       |
| 21            | 209.178            | 0.250         | 3.819      | 0.175        | 0.917         | 10.320      | 23.087         | 3.325        | 4.251        | 7.792         | 24.969      | 26.156       |
| 24            | 159.128            | 0.176         | 2.754      | 0.332        | 0.826         | 5.899       | 19.135         | 2.811        | 4.476        | 6.540         | 19.862      | 20.911       |
| 27            | 108.601            | 0.115         | 1.358      | 0.299        | 0.568         | 2.858       | 14.064         | 2.182        | 3.744        | 6.132         | 13.763      | 15.067       |
| 30            | 77.165             | 0.064         | 0.632      | 0.395        | 0.419         | 1.911       | 10.676         | 1.536        | 3.137        | 6.855         | 9.142       | 11.427       |
| 33            | 56.813             | 0.071         | 1.808      | 0.295        | 0.331         | 1.674       | 8.444          | 0.947        | 2.456        | 5.847         | 7.094       | 9.193        |
| 36            | 30.438             | 0.071         | 1.639      | 0.097        | 0.266         | 1.378       | 5.114          | 0.543        | 1.748        | 3.564         | 4.634       | 5.846        |
| 39            | 10.750             | 0.031         | 0.692      | 0.049        | 0.138         | 0.584       | 2.218          | 0.228        | 1.012        | 1.717         | 1.972       | 2.615        |
| 42            | 2.084              | 0.012         | 0.154      | 0.017        | 0.083         | 0.102       | 0.601          | 0.064        | 0.674        | 0.831         | 0.413       | 0.928        |
| 45            | 0.912              | 0.011         | 0.035      | 0.008        | 0.080         | 0.037       | 0.147          | 0.018        | 0.658        | 0.678         | 0.065       | 0.681        |
| 48            | 0.450              | 0.016         | 0.021      | 0.005        | 0.088         | 0.013       | 0.075          | 0.010        | 0.679        | 0.687         | 0.050       | 0.689        |
| 52            | -0.002             | 0.019         | 0.022      | 0.007        | 0.098         | 0.013       | 0.046          | 0.008        | 0.848        | 0.855         | 0.021       | 0.856        |
| 56            | 0.424              | 0.016         | 0.039      | 0.013        | 0.115         | 0.037       | 0.061          | 0.012        | 1.130        | 1.138         | 0.044       | 1.139        |
| 60            | 0.185              | 0.013         | 0.043      | 0.011        | 0.183         | 0.027       | 0.050          | 0.012        | 1.369        | 1.383         | 0.030       | 1.383        |
| 64            | -0.258             | 0.016         | 0.064      | 0.013        | 0.306         | 0.068       | 0.069          | 0.016        | 1.697        | 1.728         | 0.056       | 1.729        |
| 68            | -0.269             | 0.017         | 0.071      | 0.013        | 0.326         | 0.070       | 0.072          | 0.017        | 1.672        | 1.706         | 0.068       | 1.708        |

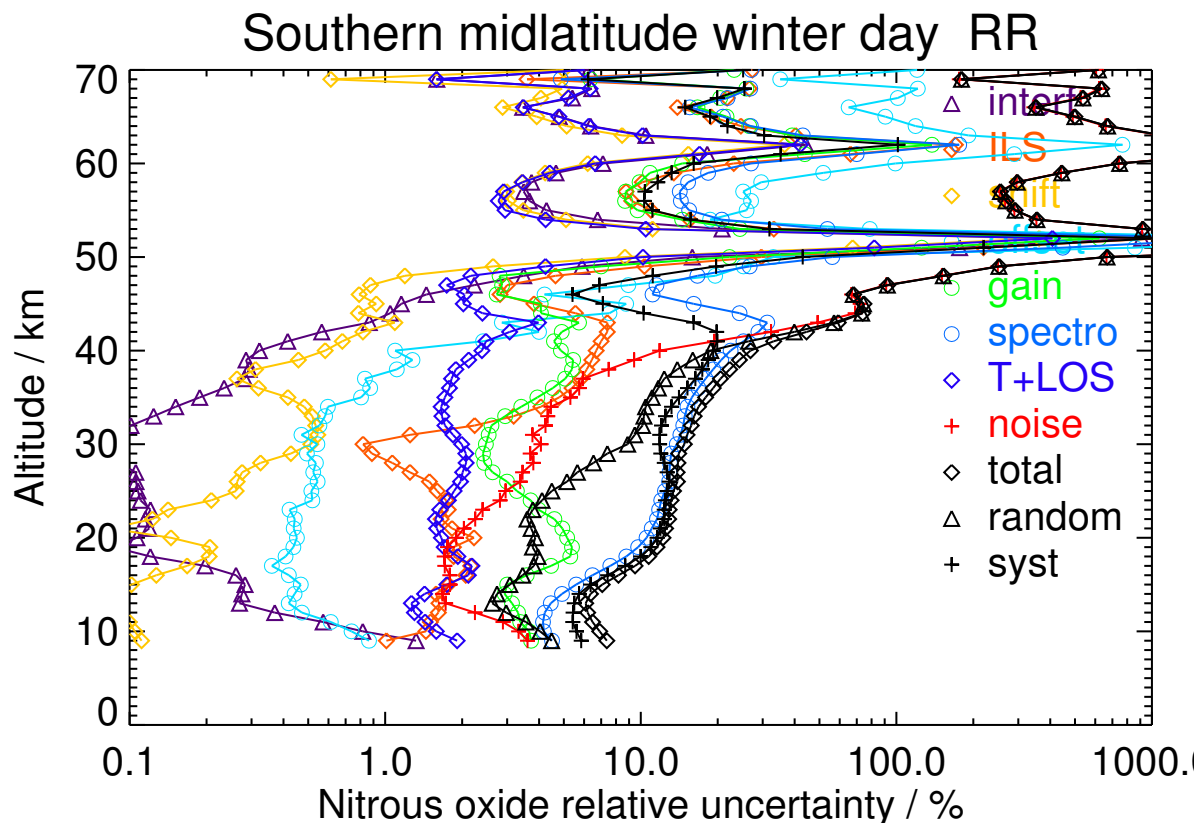

**Figure S189.** V8R\_N2O\_261 Southern midlatitude winter day

**Table S190.** Nitrous oxide error budget for Southern midlatitude winter night. All uncertainties are  $1\sigma$ .

| altitude (km) | mean target (ppbv) | interf (ppbv) | ILS (ppbv) | shift (ppbv) | offset (ppbv) | gain (ppbv) | spectro (ppbv) | T+LOS (ppbv) | noise (ppbv) | random (ppbv) | syst (ppbv) | total (ppbv) |
|---------------|--------------------|---------------|------------|--------------|---------------|-------------|----------------|--------------|--------------|---------------|-------------|--------------|
| 9             | 310.415            | 3.303         | 2.015      | 0.374        | 2.439         | 9.117       | 12.569         | 4.865        | 10.667       | 12.917        | 15.257      | 19.990       |
| 12            | 312.027            | 1.037         | 4.665      | 0.306        | 1.194         | 10.233      | 12.381         | 3.200        | 5.367        | 8.256         | 15.914      | 17.928       |
| 15            | 296.511            | 0.910         | 5.989      | 0.232        | 1.383         | 10.537      | 15.317         | 4.709        | 5.080        | 9.506         | 18.491      | 20.792       |
| 18            | 265.315            | 0.318         | 9.052      | 0.286        | 1.678         | 19.779      | 17.094         | 5.941        | 4.479        | 11.849        | 26.140      | 28.700       |
| 21            | 206.084            | 0.243         | 2.490      | 0.251        | 1.235         | 13.316      | 18.726         | 3.548        | 4.230        | 8.966         | 22.044      | 23.797       |
| 24            | 150.941            | 0.161         | 2.567      | 0.309        | 0.754         | 5.737       | 16.160         | 2.600        | 3.906        | 6.743         | 16.670      | 17.982       |
| 27            | 105.715            | 0.102         | 1.866      | 0.270        | 0.636         | 2.550       | 13.337         | 2.277        | 3.914        | 6.201         | 13.054      | 14.451       |
| 30            | 65.308             | 0.065         | 0.654      | 0.316        | 0.356         | 1.659       | 8.908          | 1.520        | 2.746        | 5.067         | 8.182       | 9.624        |
| 33            | 46.593             | 0.072         | 0.978      | 0.334        | 0.292         | 0.884       | 6.133          | 0.810        | 2.341        | 4.689         | 4.869       | 6.760        |
| 36            | 27.162             | 0.073         | 1.052      | 0.140        | 0.267         | 1.333       | 3.345          | 0.442        | 1.584        | 2.625         | 3.159       | 4.108        |
| 39            | 11.649             | 0.029         | 0.562      | 0.048        | 0.146         | 0.680       | 1.691          | 0.209        | 0.956        | 1.423         | 1.610       | 2.149        |
| 42            | 2.840              | 0.010         | 0.151      | 0.018        | 0.090         | 0.133       | 0.581          | 0.069        | 0.683        | 0.769         | 0.516       | 0.926        |
| 45            | 0.622              | 0.012         | 0.028      | 0.006        | 0.086         | 0.022       | 0.150          | 0.018        | 0.699        | 0.719         | 0.062       | 0.721        |
| 48            | 0.379              | 0.016         | 0.014      | 0.005        | 0.083         | 0.014       | 0.060          | 0.009        | 0.725        | 0.732         | 0.028       | 0.733        |
| 52            | 0.312              | 0.019         | 0.019      | 0.007        | 0.100         | 0.018       | 0.046          | 0.009        | 0.957        | 0.964         | 0.026       | 0.964        |
| 56            | 0.349              | 0.016         | 0.019      | 0.008        | 0.113         | 0.035       | 0.040          | 0.012        | 1.171        | 1.178         | 0.033       | 1.178        |
| 60            | -0.224             | 0.016         | 0.040      | 0.008        | 0.190         | 0.030       | 0.040          | 0.012        | 1.371        | 1.385         | 0.022       | 1.385        |
| 64            | -0.811             | 0.020         | 0.059      | 0.017        | 0.310         | 0.074       | 0.059          | 0.018        | 1.708        | 1.738         | 0.070       | 1.740        |
| 68            | -0.835             | 0.018         | 0.042      | 0.010        | 0.331         | 0.091       | 0.041          | 0.019        | 1.688        | 1.722         | 0.085       | 1.724        |

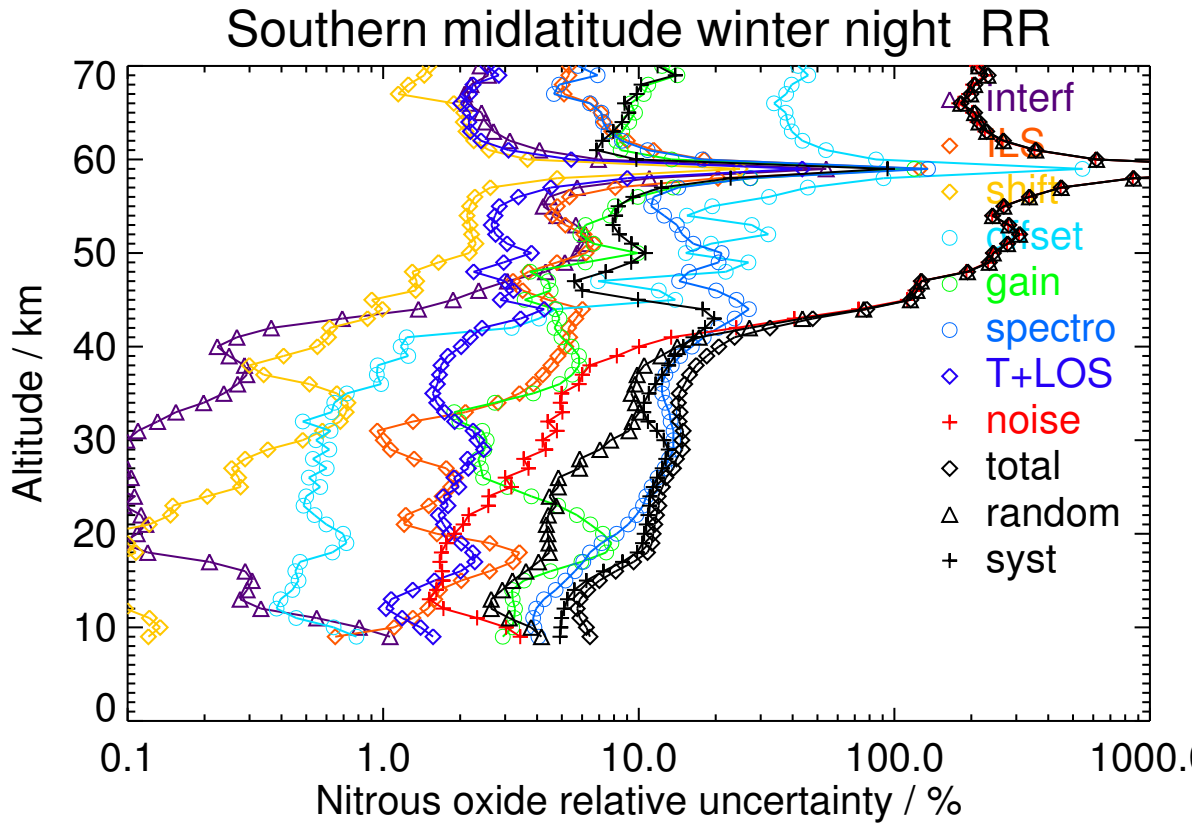

**Figure S190.** V8R\_N2O\_261 Southern midlatitude winter night

**Table S191.** Nitrous oxide error budget for Southern midlatitude spring day. All uncertainties are  $1\sigma$ .

| altitude (km) | mean target (ppbv) | interf (ppbv) | ILS (ppbv) | shift (ppbv) | offset (ppbv) | gain (ppbv) | spectro (ppbv) | T+LOS (ppbv) | noise (ppbv) | random (ppbv) | syst (ppbv) | total (ppbv) |
|---------------|--------------------|---------------|------------|--------------|---------------|-------------|----------------|--------------|--------------|---------------|-------------|--------------|
| 9             | 309.480            | 5.107         | 4.745      | 0.479        | 2.357         | 9.179       | 15.008         | 5.237        | 11.161       | 15.473        | 16.627      | 22.713       |
| 12            | 304.384            | 1.787         | 6.668      | 0.476        | 1.321         | 8.879       | 14.555         | 3.909        | 5.999        | 11.972        | 15.756      | 19.788       |
| 15            | 284.134            | 1.426         | 7.188      | 0.448        | 1.371         | 7.585       | 18.861         | 5.092        | 5.730        | 13.628        | 18.495      | 22.974       |
| 18            | 230.137            | 0.449         | 9.830      | 0.577        | 1.157         | 11.155      | 22.468         | 4.731        | 4.037        | 16.578        | 22.172      | 27.685       |
| 21            | 170.194            | 0.273         | 7.135      | 0.363        | 0.817         | 7.865       | 19.077         | 3.201        | 3.746        | 14.082        | 17.422      | 22.402       |
| 24            | 171.304            | 0.194         | 3.405      | 0.241        | 0.766         | 4.938       | 14.920         | 2.407        | 3.361        | 8.516         | 14.277      | 16.624       |
| 27            | 167.006            | 0.183         | 1.525      | 0.444        | 0.540         | 2.920       | 14.456         | 2.163        | 3.180        | 5.831         | 14.182      | 15.334       |
| 30            | 140.147            | 0.122         | 1.323      | 0.678        | 0.413         | 3.404       | 13.589         | 1.961        | 2.438        | 5.710         | 13.260      | 14.437       |
| 33            | 88.137             | 0.090         | 2.855      | 0.454        | 0.316         | 3.121       | 10.342         | 1.229        | 1.845        | 3.886         | 10.723      | 11.405       |
| 36            | 29.364             | 0.073         | 1.772      | 0.188        | 0.201         | 1.420       | 4.598          | 0.544        | 1.179        | 2.577         | 4.628       | 5.297        |
| 39            | 11.298             | 0.031         | 0.529      | 0.061        | 0.137         | 0.740       | 1.235          | 0.168        | 0.720        | 1.067         | 1.336       | 1.710        |
| 42            | 6.742              | 0.014         | 0.214      | 0.046        | 0.092         | 0.376       | 0.671          | 0.077        | 0.540        | 0.694         | 0.681       | 0.973        |
| 45            | 2.639              | 0.012         | 0.032      | 0.014        | 0.079         | 0.100       | 0.282          | 0.038        | 0.511        | 0.541         | 0.259       | 0.600        |
| 48            | 2.161              | 0.016         | 0.029      | 0.009        | 0.079         | 0.057       | 0.111          | 0.015        | 0.521        | 0.533         | 0.104       | 0.543        |
| 52            | 1.501              | 0.019         | 0.031      | 0.010        | 0.093         | 0.039       | 0.119          | 0.015        | 0.708        | 0.718         | 0.107       | 0.726        |
| 56            | 0.547              | 0.015         | 0.045      | 0.019        | 0.115         | 0.074       | 0.081          | 0.015        | 1.002        | 1.011         | 0.095       | 1.016        |
| 60            | -0.032             | 0.019         | 0.088      | 0.020        | 0.170         | 0.071       | 0.068          | 0.013        | 1.293        | 1.307         | 0.098       | 1.311        |
| 64            | -0.267             | 0.045         | 0.268      | 0.086        | 0.292         | 0.413       | 0.239          | 0.047        | 1.660        | 1.722         | 0.430       | 1.775        |
| 68            | -0.496             | 0.051         | 0.308      | 0.104        | 0.319         | 0.532       | 0.273          | 0.056        | 1.660        | 1.754         | 0.499       | 1.824        |

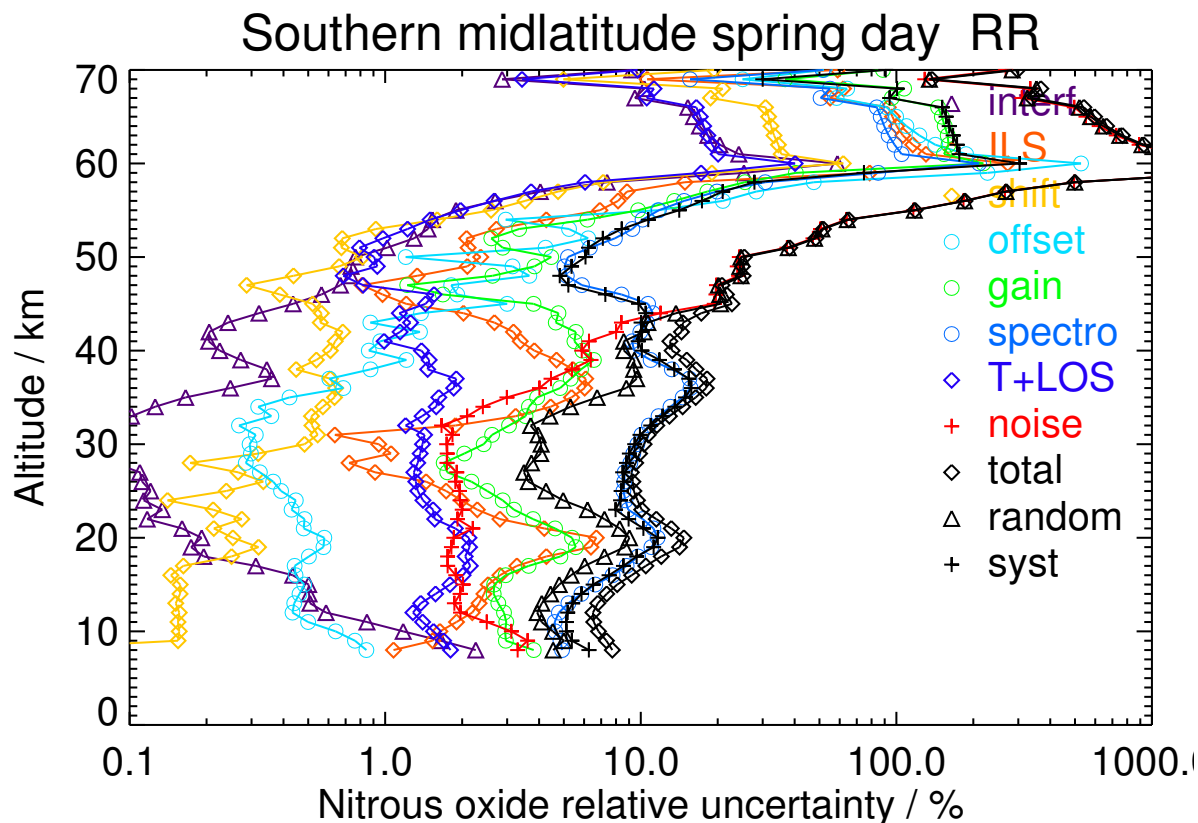

**Figure S191.** V8R\_N2O\_261 Southern midlatitude spring day

**Table S192.** Nitrous oxide error budget for Southern midlatitude spring night. All uncertainties are  $1\sigma$ .

| altitude (km) | mean target (ppbv) | interf (ppbv) | ILS (ppbv) | shift (ppbv) | offset (ppbv) | gain (ppbv) | spectro (ppbv) | T+LOS (ppbv) | noise (ppbv) | random (ppbv) | syst (ppbv) | total (ppbv) |
|---------------|--------------------|---------------|------------|--------------|---------------|-------------|----------------|--------------|--------------|---------------|-------------|--------------|
| 9             | 314.018            | 3.682         | 6.231      | 0.320        | 2.466         | 11.182      | 11.780         | 5.209        | 10.731       | 14.508        | 15.944      | 21.557       |
| 12            | 316.116            | 1.520         | 9.825      | 0.278        | 1.494         | 12.617      | 12.410         | 4.258        | 6.296        | 10.756        | 18.880      | 21.729       |
| 15            | 289.011            | 1.263         | 11.964     | 0.229        | 1.541         | 11.747      | 14.926         | 5.482        | 5.312        | 12.791        | 20.065      | 23.795       |
| 18            | 228.069            | 0.401         | 10.179     | 0.493        | 1.721         | 19.266      | 21.750         | 5.443        | 4.010        | 19.425        | 24.891      | 31.574       |
| 21            | 145.821            | 0.225         | 6.185      | 0.268        | 0.911         | 9.809       | 17.208         | 2.930        | 3.664        | 13.767        | 16.249      | 21.297       |
| 24            | 137.896            | 0.211         | 3.020      | 0.247        | 0.601         | 3.779       | 14.200         | 1.946        | 3.091        | 10.303        | 11.519      | 15.455       |
| 27            | 134.160            | 0.185         | 2.143      | 0.463        | 0.575         | 2.857       | 12.475         | 1.878        | 3.062        | 8.511         | 10.461      | 13.486       |
| 30            | 132.066            | 0.100         | 1.631      | 0.679        | 0.413         | 4.155       | 13.317         | 1.689        | 2.190        | 5.954         | 13.043      | 14.337       |
| 33            | 74.414             | 0.080         | 2.840      | 0.443        | 0.282         | 2.794       | 10.198         | 1.135        | 1.715        | 4.916         | 10.011      | 11.153       |
| 36            | 23.415             | 0.067         | 1.502      | 0.127        | 0.196         | 1.353       | 3.716          | 0.442        | 1.077        | 2.204         | 3.802       | 4.394        |
| 39            | 9.785              | 0.026         | 0.503      | 0.070        | 0.116         | 0.522       | 1.089          | 0.140        | 0.639        | 0.907         | 1.156       | 1.469        |
| 42            | 4.513              | 0.012         | 0.196      | 0.035        | 0.080         | 0.193       | 0.469          | 0.057        | 0.474        | 0.542         | 0.488       | 0.729        |
| 45            | 2.667              | 0.012         | 0.042      | 0.015        | 0.075         | 0.076       | 0.181          | 0.026        | 0.483        | 0.501         | 0.172       | 0.530        |
| 48            | 2.118              | 0.016         | 0.027      | 0.010        | 0.076         | 0.040       | 0.121          | 0.014        | 0.507        | 0.517         | 0.115       | 0.529        |
| 52            | 1.539              | 0.020         | 0.030      | 0.010        | 0.092         | 0.033       | 0.098          | 0.012        | 0.695        | 0.703         | 0.093       | 0.709        |
| 56            | 0.911              | 0.015         | 0.053      | 0.020        | 0.112         | 0.046       | 0.090          | 0.013        | 0.988        | 0.997         | 0.093       | 1.001        |
| 60            | 0.202              | 0.019         | 0.092      | 0.022        | 0.160         | 0.035       | 0.070          | 0.012        | 1.240        | 1.254         | 0.082       | 1.256        |
| 64            | -0.186             | 0.044         | 0.367      | 0.102        | 0.281         | 0.249       | 0.291          | 0.033        | 1.608        | 1.674         | 0.396       | 1.720        |
| 68            | -0.092             | 0.054         | 0.493      | 0.142        | 0.309         | 0.312       | 0.397          | 0.042        | 1.636        | 1.739         | 0.520       | 1.815        |

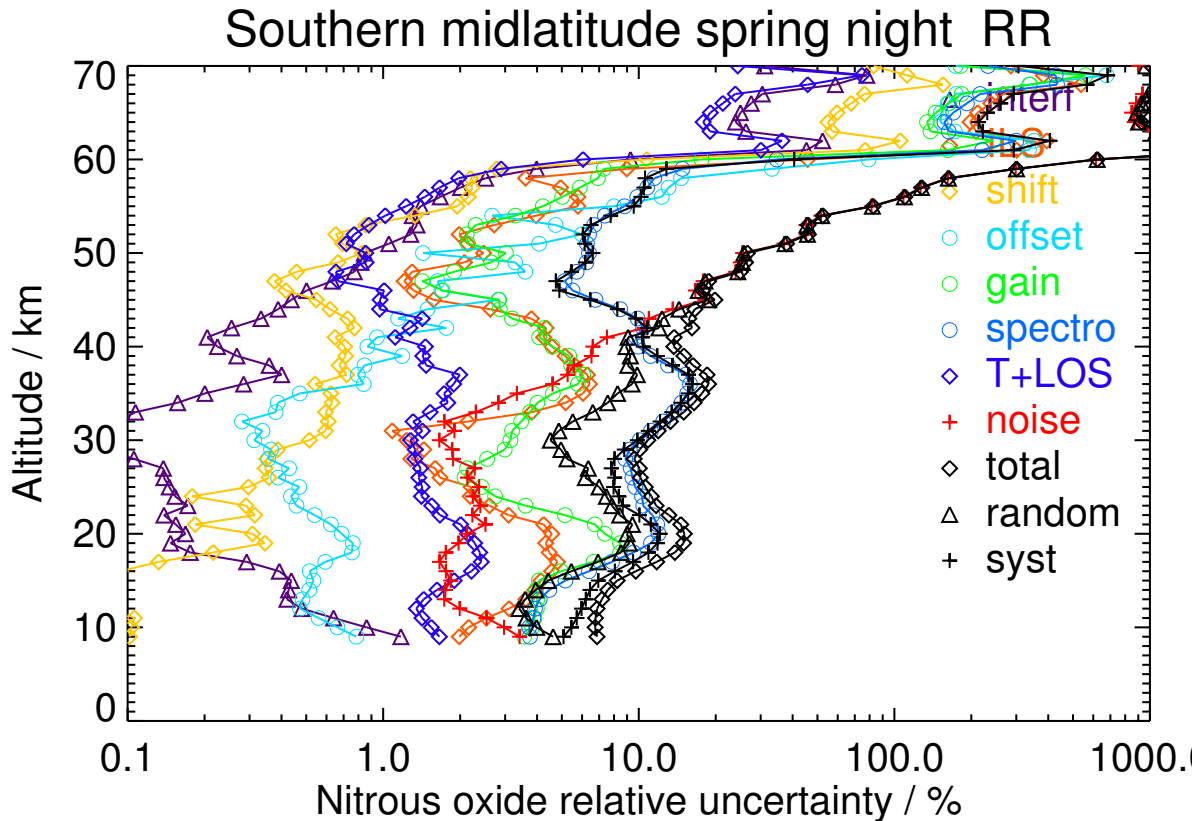

**Figure S192.** V8R\_N2O\_261 Southern midlatitude spring night

**Table S193.** Nitrous oxide error budget for Southern midlatitude summer day. All uncertainties are  $1\sigma$ .

| altitude (km) | mean target (ppbv) | interf (ppbv) | ILS (ppbv) | shift (ppbv) | offset (ppbv) | gain (ppbv) | spectro (ppbv) | T+LOS (ppbv) | noise (ppbv) | random (ppbv) | syst (ppbv) | total (ppbv) |
|---------------|--------------------|---------------|------------|--------------|---------------|-------------|----------------|--------------|--------------|---------------|-------------|--------------|
| 9             | 306.766            | 4.761         | 2.899      | 0.450        | 2.209         | 8.303       | 14.907         | 4.878        | 9.946        | 13.640        | 16.247      | 21.214       |
| 12            | 308.927            | 1.606         | 7.718      | 0.324        | 1.108         | 11.791      | 13.474         | 3.220        | 4.972        | 11.160        | 17.164      | 20.473       |
| 15            | 303.757            | 1.325         | 14.497     | 0.516        | 1.548         | 13.277      | 16.480         | 4.983        | 5.386        | 18.946        | 18.903      | 26.764       |
| 18            | 254.656            | 0.807         | 11.808     | 0.518        | 1.443         | 14.042      | 18.119         | 4.877        | 4.610        | 17.367        | 20.281      | 26.701       |
| 21            | 200.220            | 0.396         | 10.444     | 0.335        | 0.807         | 2.802       | 22.656         | 3.979        | 3.951        | 10.284        | 23.597      | 25.740       |
| 24            | 167.600            | 0.252         | 4.594      | 0.156        | 0.614         | 1.893       | 16.482         | 2.530        | 3.071        | 6.743         | 16.346      | 17.682       |
| 27            | 124.274            | 0.176         | 1.386      | 0.498        | 0.550         | 2.014       | 13.605         | 2.207        | 3.124        | 5.053         | 13.444      | 14.363       |
| 30            | 78.409             | 0.107         | 1.258      | 0.633        | 0.263         | 1.599       | 7.062          | 1.156        | 1.815        | 2.875         | 7.131       | 7.689        |
| 33            | 53.315             | 0.085         | 1.611      | 0.554        | 0.261         | 1.480       | 4.315          | 0.666        | 1.507        | 1.957         | 4.762       | 5.148        |
| 36            | 29.402             | 0.084         | 1.405      | 0.171        | 0.183         | 1.140       | 2.834          | 0.360        | 0.986        | 1.260         | 3.300       | 3.532        |
| 39            | 14.344             | 0.033         | 0.727      | 0.096        | 0.108         | 0.598       | 1.500          | 0.177        | 0.582        | 0.807         | 1.696       | 1.878        |
| 42            | 5.622              | 0.012         | 0.180      | 0.043        | 0.067         | 0.180       | 0.620          | 0.073        | 0.382        | 0.538         | 0.563       | 0.779        |
| 45            | 2.712              | 0.010         | 0.030      | 0.020        | 0.058         | 0.054       | 0.238          | 0.032        | 0.352        | 0.387         | 0.200       | 0.435        |
| 48            | 0.930              | 0.014         | 0.016      | 0.007        | 0.056         | 0.020       | 0.142          | 0.017        | 0.350        | 0.369         | 0.104       | 0.383        |
| 52            | 0.182              | 0.017         | 0.011      | 0.005        | 0.073         | 0.009       | 0.040          | 0.007        | 0.509        | 0.516         | 0.018       | 0.516        |
| 56            | 0.031              | 0.014         | 0.044      | 0.017        | 0.101         | 0.012       | 0.038          | 0.007        | 0.786        | 0.793         | 0.050       | 0.795        |
| 60            | 0.204              | 0.015         | 0.040      | 0.014        | 0.139         | 0.015       | 0.045          | 0.008        | 1.059        | 1.070         | 0.024       | 1.070        |
| 64            | -0.392             | 0.057         | 0.280      | 0.094        | 0.253         | 0.132       | 0.259          | 0.018        | 1.439        | 1.474         | 0.369       | 1.520        |
| 68            | -0.408             | 0.074         | 0.381      | 0.130        | 0.286         | 0.168       | 0.362          | 0.025        | 1.530        | 1.569         | 0.538       | 1.659        |

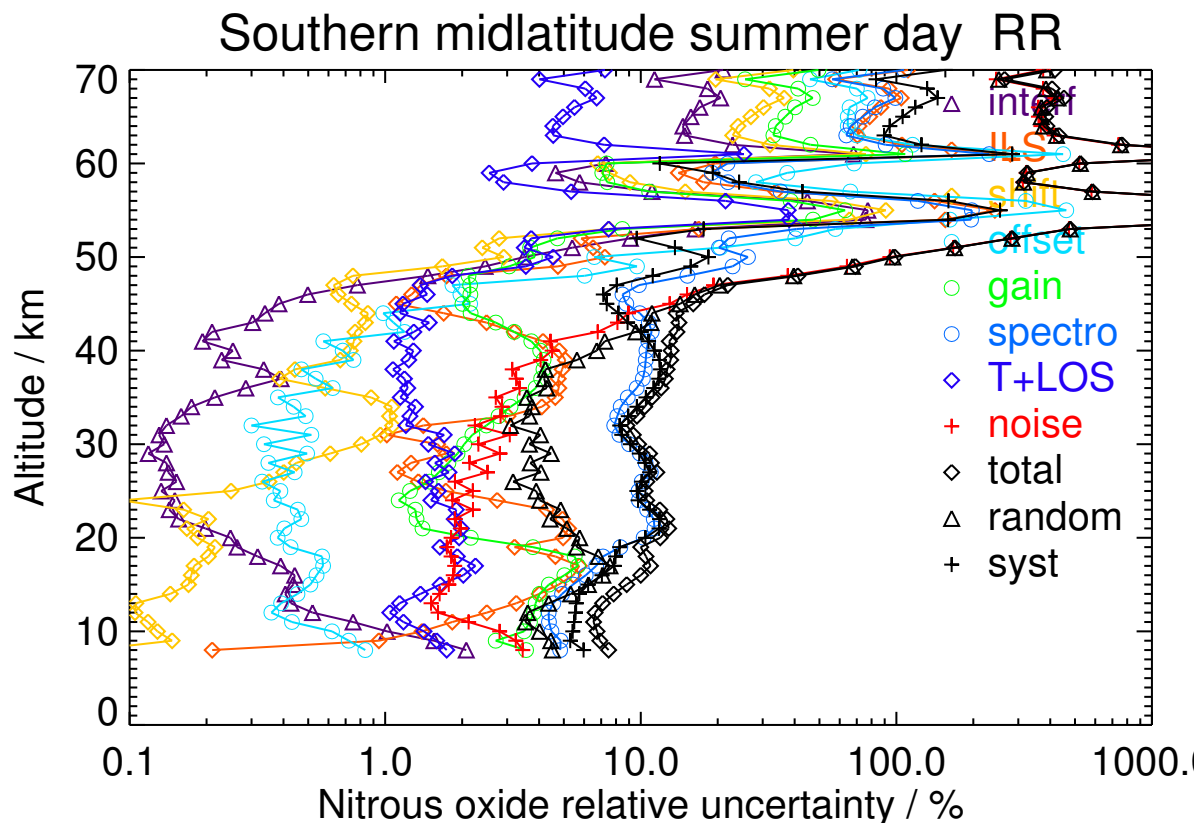

**Figure S193.** V8R\_N2O\_261 Southern midlatitude summer day

**Table S194.** Nitrous oxide error budget for Southern midlatitude summer night. All uncertainties are  $1\sigma$ .

| altitude (km) | mean target (ppbv) | interf (ppbv) | ILS (ppbv) | shift (ppbv) | offset (ppbv) | gain (ppbv) | spectro (ppbv) | T+LOS (ppbv) | noise (ppbv) | random (ppbv) | syst (ppbv) | total (ppbv) |
|---------------|--------------------|---------------|------------|--------------|---------------|-------------|----------------|--------------|--------------|---------------|-------------|--------------|
| 9             | 313.327            | 4.380         | 2.563      | 0.425        | 2.092         | 7.540       | 13.768         | 4.579        | 9.511        | 12.831        | 14.950      | 19.701       |
| 12            | 311.900            | 1.377         | 6.035      | 0.280        | 1.092         | 11.040      | 13.567         | 2.998        | 4.831        | 7.748         | 17.829      | 19.439       |
| 15            | 293.682            | 1.317         | 11.109     | 0.387        | 1.486         | 13.078      | 16.609         | 4.590        | 5.110        | 11.681        | 22.025      | 24.931       |
| 18            | 263.172            | 0.731         | 11.439     | 0.766        | 2.134         | 20.258      | 22.084         | 5.326        | 4.400        | 16.348        | 28.550      | 32.899       |
| 21            | 195.227            | 0.310         | 6.068      | 0.456        | 0.613         | 6.569       | 23.515         | 3.162        | 3.794        | 10.547        | 23.383      | 25.652       |
| 24            | 165.659            | 0.290         | 3.308      | 0.237        | 0.528         | 1.455       | 14.734         | 2.289        | 3.063        | 6.142         | 14.404      | 15.659       |
| 27            | 118.632            | 0.166         | 1.120      | 0.512        | 0.534         | 1.673       | 13.006         | 2.076        | 3.117        | 4.469         | 12.955      | 13.704       |
| 30            | 79.588             | 0.111         | 1.263      | 0.683        | 0.267         | 1.711       | 7.127          | 1.147        | 1.806        | 2.702         | 7.290       | 7.775        |
| 33            | 54.120             | 0.082         | 1.591      | 0.554        | 0.251         | 1.651       | 4.492          | 0.655        | 1.474        | 1.902         | 4.980       | 5.330        |
| 36            | 29.537             | 0.081         | 1.584      | 0.181        | 0.177         | 1.184       | 2.987          | 0.370        | 0.952        | 1.231         | 3.526       | 3.734        |
| 39            | 12.947             | 0.031         | 0.707      | 0.090        | 0.098         | 0.532       | 1.383          | 0.155        | 0.528        | 0.750         | 1.567       | 1.737        |
| 42            | 5.744              | 0.011         | 0.225      | 0.054        | 0.064         | 0.159       | 0.581          | 0.066        | 0.349        | 0.493         | 0.551       | 0.740        |
| 45            | 2.132              | 0.010         | 0.028      | 0.017        | 0.057         | 0.039       | 0.228          | 0.032        | 0.329        | 0.362         | 0.191       | 0.409        |
| 48            | 1.000              | 0.013         | 0.019      | 0.007        | 0.056         | 0.021       | 0.106          | 0.013        | 0.338        | 0.353         | 0.069       | 0.360        |
| 52            | 0.163              | 0.017         | 0.014      | 0.006        | 0.074         | 0.008       | 0.044          | 0.008        | 0.495        | 0.502         | 0.024       | 0.503        |
| 56            | 0.126              | 0.015         | 0.037      | 0.014        | 0.099         | 0.014       | 0.035          | 0.006        | 0.756        | 0.763         | 0.042       | 0.765        |
| 60            | -0.286             | 0.015         | 0.033      | 0.012        | 0.132         | 0.016       | 0.033          | 0.006        | 1.014        | 1.023         | 0.019       | 1.024        |
| 64            | -0.711             | 0.049         | 0.244      | 0.078        | 0.239         | 0.120       | 0.230          | 0.015        | 1.357        | 1.388         | 0.328       | 1.426        |
| 68            | -0.906             | 0.073         | 0.395      | 0.135        | 0.279         | 0.176       | 0.380          | 0.026        | 1.497        | 1.539         | 0.553       | 1.636        |

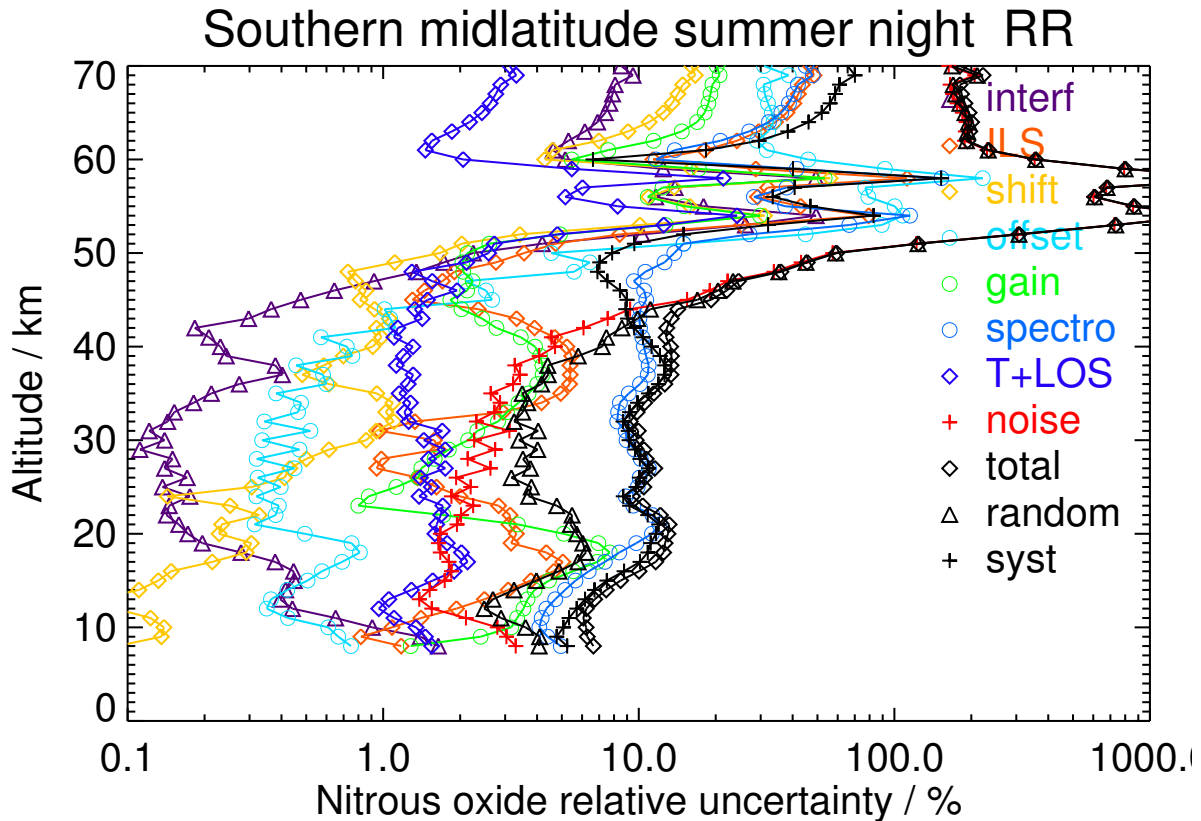

**Figure S194.** V8R\_N2O\_261 Southern midlatitude summer night



**Table S195.** Nitrous oxide error budget for Southern midlatitude autumn day. All uncertainties are  $1\sigma$ .

| altitude (km) | mean target (ppbv) | interf (ppbv) | ILS (ppbv) | shift (ppbv) | offset (ppbv) | gain (ppbv) | spectro (ppbv) | T+LOS (ppbv) | noise (ppbv) | random (ppbv) | syst (ppbv) | total (ppbv) |
|---------------|--------------------|---------------|------------|--------------|---------------|-------------|----------------|--------------|--------------|---------------|-------------|--------------|
| 9             | 313.316            | 3.401         | 3.298      | 0.430        | 2.283         | 11.001      | 12.879         | 4.670        | 10.164       | 12.714        | 16.679      | 20.973       |
| 12            | 318.161            | 0.988         | 6.977      | 0.250        | 1.179         | 12.556      | 13.119         | 3.670        | 5.184        | 8.344         | 18.750      | 20.523       |
| 15            | 309.010            | 0.928         | 10.462     | 0.230        | 1.532         | 13.499      | 15.317         | 5.435        | 5.172        | 10.946        | 21.587      | 24.204       |
| 18            | 273.866            | 0.305         | 9.964      | 0.475        | 1.832         | 21.388      | 20.019         | 5.697        | 4.231        | 14.771        | 28.167      | 31.805       |
| 21            | 205.309            | 0.271         | 5.240      | 0.330        | 1.093         | 12.527      | 21.708         | 3.718        | 3.896        | 11.985        | 23.289      | 26.192       |
| 24            | 152.843            | 0.172         | 2.210      | 0.283        | 0.748         | 6.082       | 17.246         | 2.686        | 3.797        | 7.146         | 17.622      | 19.016       |
| 27            | 104.994            | 0.111         | 1.389      | 0.303        | 0.458         | 2.596       | 12.313         | 1.896        | 2.925        | 4.629         | 12.301      | 13.143       |
| 30            | 61.560             | 0.054         | 0.627      | 0.325        | 0.345         | 1.680       | 8.103          | 1.237        | 2.313        | 3.965         | 7.762       | 8.716        |
| 33            | 34.829             | 0.063         | 1.160      | 0.224        | 0.281         | 1.439       | 4.565          | 0.615        | 1.712        | 2.910         | 4.385       | 5.263        |
| 36            | 17.696             | 0.049         | 0.999      | 0.123        | 0.191         | 1.099       | 2.611          | 0.268        | 1.067        | 2.358         | 2.173       | 3.207        |
| 39            | 11.299             | 0.041         | 0.707      | 0.038        | 0.136         | 0.796       | 1.570          | 0.144        | 0.762        | 1.649         | 1.225       | 2.054        |
| 42            | 7.239              | 0.020         | 0.389      | 0.042        | 0.100         | 0.468       | 0.932          | 0.076        | 0.651        | 1.080         | 0.717       | 1.296        |
| 45            | 4.721              | 0.014         | 0.118      | 0.030        | 0.091         | 0.187       | 0.488          | 0.045        | 0.653        | 0.764         | 0.377       | 0.852        |
| 48            | 3.303              | 0.017         | 0.056      | 0.014        | 0.096         | 0.089       | 0.278          | 0.032        | 0.689        | 0.722         | 0.231       | 0.758        |
| 52            | 1.942              | 0.020         | 0.038      | 0.012        | 0.106         | 0.062       | 0.161          | 0.023        | 0.896        | 0.909         | 0.141       | 0.920        |
| 56            | 1.399              | 0.016         | 0.023      | 0.013        | 0.126         | 0.075       | 0.107          | 0.020        | 1.184        | 1.193         | 0.106       | 1.198        |
| 60            | 0.576              | 0.020         | 0.073      | 0.019        | 0.207         | 0.056       | 0.083          | 0.019        | 1.443        | 1.462         | 0.060       | 1.463        |
| 64            | -0.657             | 0.029         | 0.109      | 0.034        | 0.329         | 0.167       | 0.105          | 0.028        | 1.765        | 1.804         | 0.154       | 1.810        |
| 68            | -1.131             | 0.025         | 0.074      | 0.024        | 0.351         | 0.221       | 0.090          | 0.032        | 1.740        | 1.781         | 0.203       | 1.793        |

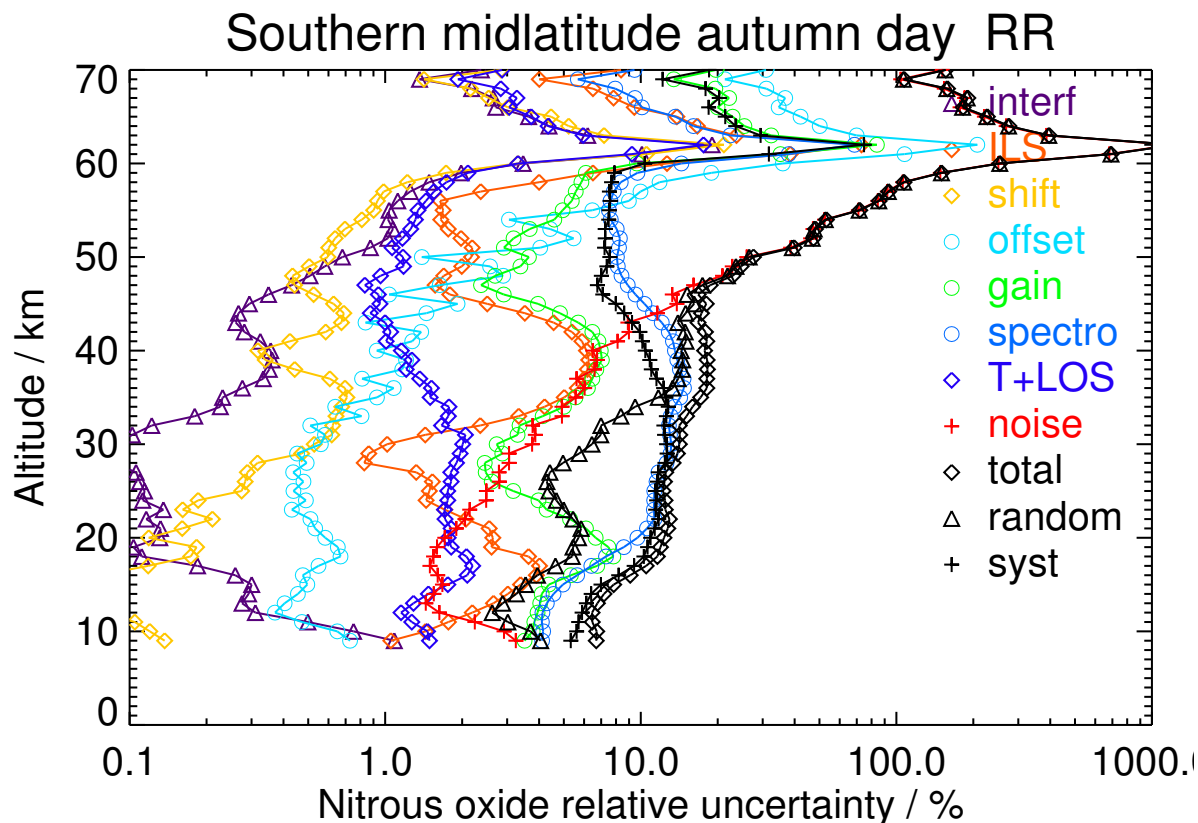

**Figure S195.** V8R\_N2O\_261 Southern midlatitude autumn day



**Table S196.** Nitrous oxide error budget for Southern midlatitude autumn night. All uncertainties are  $1\sigma$ .

| altitude (km) | mean target (ppbv) | interf (ppbv) | ILS (ppbv) | shift (ppbv) | offset (ppbv) | gain (ppbv) | spectro (ppbv) | T+LOS (ppbv) | noise (ppbv) | random (ppbv) | syst (ppbv) | total (ppbv) |
|---------------|--------------------|---------------|------------|--------------|---------------|-------------|----------------|--------------|--------------|---------------|-------------|--------------|
| 9             | 311.848            | 3.391         | 2.343      | 0.510        | 2.243         | 8.820       | 11.877         | 4.169        | 10.315       | 12.294        | 14.620      | 19.102       |
| 12            | 320.248            | 1.079         | 8.021      | 0.234        | 1.177         | 13.525      | 13.211         | 3.400        | 4.909        | 8.588         | 19.655      | 21.449       |
| 15            | 309.600            | 1.093         | 12.888     | 0.237        | 1.646         | 16.134      | 15.455         | 5.631        | 5.465        | 10.743        | 24.807      | 27.034       |
| 18            | 272.216            | 0.369         | 11.951     | 0.486        | 1.910         | 22.179      | 20.106         | 5.899        | 4.263        | 13.449        | 30.251      | 33.106       |
| 21            | 200.913            | 0.277         | 6.334      | 0.305        | 1.127         | 11.605      | 21.452         | 3.754        | 3.984        | 12.535        | 22.567      | 25.815       |
| 24            | 149.954            | 0.195         | 3.263      | 0.298        | 0.693         | 3.576       | 15.766         | 2.474        | 3.249        | 6.328         | 15.787      | 17.008       |
| 27            | 104.465            | 0.115         | 1.958      | 0.309        | 0.602         | 1.706       | 12.962         | 2.083        | 3.339        | 5.698         | 12.579      | 13.810       |
| 30            | 61.180             | 0.060         | 0.542      | 0.394        | 0.229         | 1.512       | 7.463          | 1.109        | 1.878        | 3.797         | 6.987       | 7.952        |
| 33            | 35.868             | 0.059         | 0.954      | 0.283        | 0.261         | 1.138       | 4.533          | 0.562        | 1.647        | 3.162         | 3.991       | 5.092        |
| 36            | 19.327             | 0.054         | 0.914      | 0.192        | 0.212         | 1.040       | 2.336          | 0.264        | 1.140        | 2.175         | 2.024       | 2.971        |
| 39            | 14.523             | 0.054         | 0.792      | 0.103        | 0.159         | 0.921       | 1.618          | 0.153        | 0.807        | 1.756         | 1.313       | 2.193        |
| 42            | 9.510              | 0.026         | 0.511      | 0.058        | 0.116         | 0.604       | 1.160          | 0.092        | 0.673        | 1.272         | 0.912       | 1.565        |
| 45            | 5.432              | 0.014         | 0.142      | 0.046        | 0.096         | 0.220       | 0.619          | 0.050        | 0.661        | 0.838         | 0.448       | 0.950        |
| 48            | 3.672              | 0.018         | 0.061      | 0.018        | 0.088         | 0.087       | 0.306          | 0.029        | 0.655        | 0.701         | 0.229       | 0.737        |
| 52            | 2.379              | 0.021         | 0.049      | 0.014        | 0.106         | 0.052       | 0.182          | 0.023        | 0.905        | 0.919         | 0.155       | 0.932        |
| 56            | 1.517              | 0.017         | 0.034      | 0.013        | 0.123         | 0.058       | 0.118          | 0.020        | 1.169        | 1.179         | 0.108       | 1.184        |
| 60            | 0.425              | 0.025         | 0.093      | 0.027        | 0.207         | 0.061       | 0.092          | 0.018        | 1.434        | 1.453         | 0.099       | 1.457        |
| 64            | -0.438             | 0.040         | 0.160      | 0.061        | 0.324         | 0.180       | 0.171          | 0.031        | 1.761        | 1.802         | 0.224       | 1.816        |
| 68            | -0.548             | 0.040         | 0.176      | 0.070        | 0.344         | 0.214       | 0.202          | 0.034        | 1.735        | 1.785         | 0.257       | 1.804        |

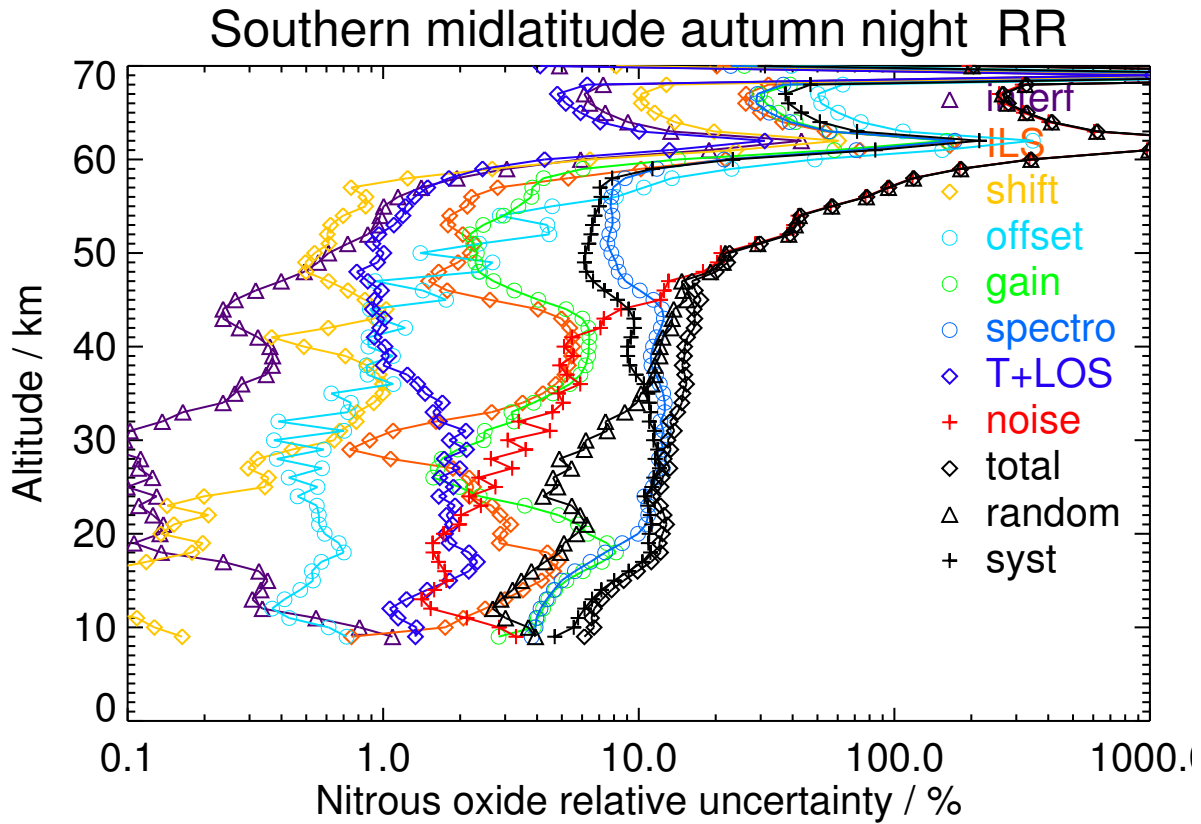

**Figure S196.** V8R\_N2O\_261 Southern midlatitude autumn night

**Table S197.** Nitrous oxide error budget for Southern polar winter day. All uncertainties are  $1\sigma$ .

| altitude (km) | mean target (ppbv) | interf (ppbv) | ILS (ppbv) | shift (ppbv) | offset (ppbv) | gain (ppbv) | spectro (ppbv) | T+LOS (ppbv) | noise (ppbv) | random (ppbv) | syst (ppbv) | total (ppbv) |
|---------------|--------------------|---------------|------------|--------------|---------------|-------------|----------------|--------------|--------------|---------------|-------------|--------------|
| 9             | 332.445            | 2.870         | 2.538      | 0.210        | 2.983         | 10.470      | 13.910         | 5.832        | 11.240       | 13.524        | 17.441      | 22.070       |
| 12            | 306.248            | 3.383         | 4.251      | 0.196        | 2.130         | 9.454       | 12.754         | 5.470        | 8.737        | 11.613        | 16.048      | 19.809       |
| 15            | 253.092            | 3.048         | 1.806      | 0.403        | 1.993         | 7.784       | 16.439         | 6.166        | 7.001        | 10.609        | 17.945      | 20.847       |
| 18            | 182.169            | 0.911         | 4.768      | 0.588        | 1.181         | 8.262       | 24.401         | 4.575        | 4.644        | 7.981         | 25.841      | 27.046       |
| 21            | 93.238             | 0.319         | 3.977      | 0.257        | 0.758         | 3.907       | 17.003         | 2.379        | 3.797        | 6.977         | 17.097      | 18.466       |
| 24            | 43.262             | 0.105         | 2.276      | 0.216        | 0.667         | 1.306       | 9.006          | 1.606        | 3.995        | 6.871         | 7.735       | 10.345       |
| 27            | 20.080             | 0.077         | 0.892      | 0.094        | 0.277         | 0.587       | 4.355          | 0.630        | 2.349        | 4.574         | 2.279       | 5.110        |
| 30            | 17.132             | 0.060         | 0.298      | 0.089        | 0.382         | 0.525       | 2.190          | 0.492        | 2.371        | 2.764         | 1.882       | 3.344        |
| 33            | 7.862              | 0.042         | 0.292      | 0.062        | 0.233         | 0.426       | 1.378          | 0.261        | 1.455        | 1.709         | 1.222       | 2.101        |
| 36            | 2.758              | 0.021         | 0.192      | 0.024        | 0.106         | 0.314       | 0.678          | 0.095        | 0.733        | 1.019         | 0.338       | 1.074        |
| 39            | 1.776              | 0.010         | 0.110      | 0.011        | 0.054         | 0.117       | 0.374          | 0.034        | 0.472        | 0.609         | 0.148       | 0.627        |
| 42            | 1.165              | 0.010         | 0.041      | 0.005        | 0.052         | 0.019       | 0.122          | 0.015        | 0.457        | 0.472         | 0.076       | 0.478        |
| 45            | 1.218              | 0.013         | 0.027      | 0.005        | 0.064         | 0.019       | 0.079          | 0.010        | 0.534        | 0.542         | 0.056       | 0.545        |
| 48            | 0.950              | 0.019         | 0.027      | 0.006        | 0.085         | 0.017       | 0.084          | 0.011        | 0.631        | 0.641         | 0.059       | 0.643        |
| 52            | 0.594              | 0.019         | 0.025      | 0.006        | 0.093         | 0.013       | 0.066          | 0.010        | 0.787        | 0.796         | 0.037       | 0.796        |
| 56            | 0.380              | 0.016         | 0.021      | 0.008        | 0.115         | 0.018       | 0.045          | 0.010        | 1.062        | 1.069         | 0.032       | 1.069        |
| 60            | 0.519              | 0.014         | 0.035      | 0.012        | 0.200         | 0.023       | 0.045          | 0.011        | 1.411        | 1.426         | 0.033       | 1.426        |
| 64            | 0.743              | 0.017         | 0.074      | 0.015        | 0.321         | 0.025       | 0.047          | 0.013        | 1.747        | 1.778         | 0.059       | 1.779        |
| 68            | 0.472              | 0.014         | 0.058      | 0.013        | 0.334         | 0.025       | 0.039          | 0.013        | 1.699        | 1.732         | 0.048       | 1.733        |

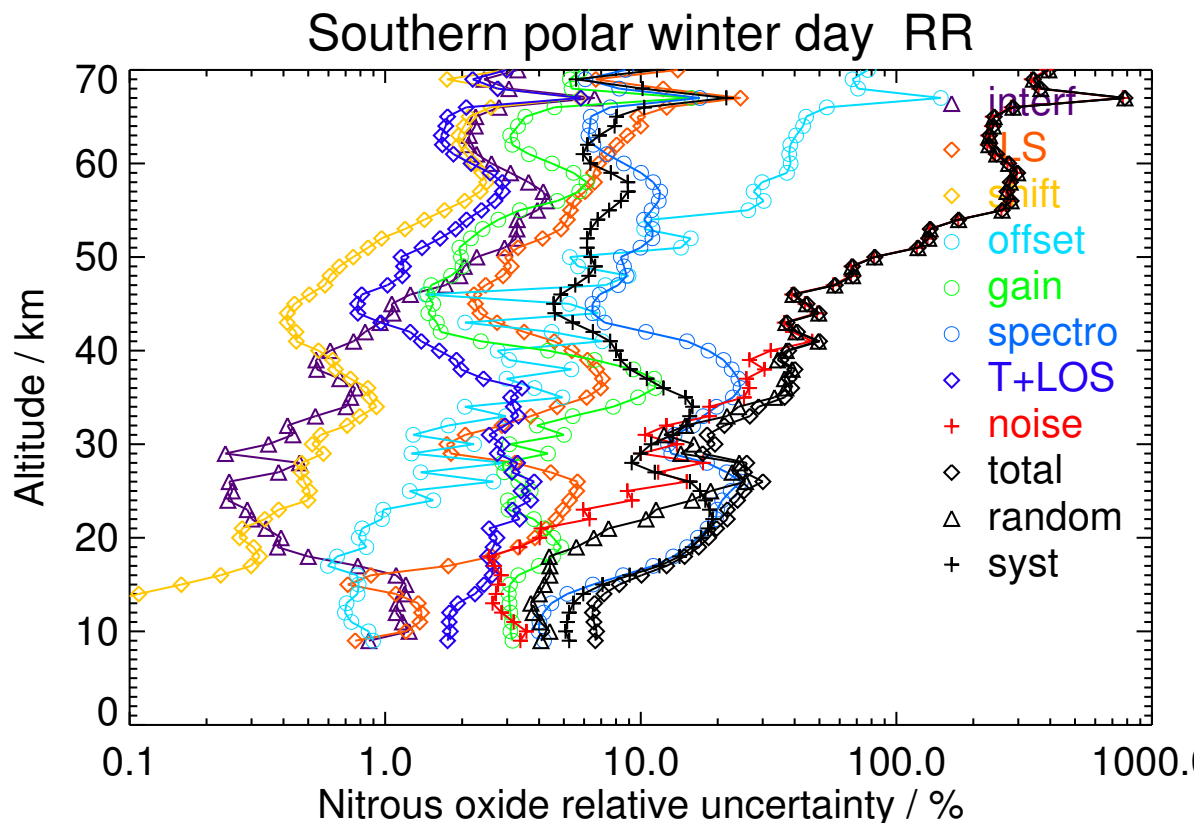

**Figure S197.** V8R\_N2O\_261 Southern polar winter day

**Table S198.** Nitrous oxide error budget for Southern polar winter night. All uncertainties are  $1\sigma$ .

| altitude<br>(km) | mean target<br>(ppbv) | interf<br>(ppbv) | ILS<br>(ppbv) | shift<br>(ppbv) | offset<br>(ppbv) | gain<br>(ppbv) | spectro<br>(ppbv) | T+LOS<br>(ppbv) | noise<br>(ppbv) | random<br>(ppbv) | syst<br>(ppbv) | total<br>(ppbv) |
|------------------|-----------------------|------------------|---------------|-----------------|------------------|----------------|-------------------|-----------------|-----------------|------------------|----------------|-----------------|
| 9                | 330.718               | 3.165            | 2.610         | 0.209           | 2.735            | 10.435         | 12.544            | 5.593           | 10.337          | 13.180           | 15.969         | 20.706          |
| 12               | 304.584               | 2.611            | 5.147         | 0.115           | 1.670            | 10.719         | 10.746            | 4.547           | 6.474           | 9.735            | 15.307         | 18.140          |
| 15               | 252.246               | 2.338            | 3.340         | 0.224           | 1.891            | 7.727          | 11.978            | 5.930           | 6.708           | 11.176           | 13.367         | 17.424          |
| 18               | 178.037               | 0.713            | 2.627         | 0.375           | 1.092            | 6.783          | 15.022            | 4.731           | 4.521           | 8.756            | 15.702         | 17.979          |
| 21               | 98.176                | 0.358            | 3.443         | 0.233           | 0.766            | 3.881          | 13.439            | 2.806           | 4.177           | 6.380            | 13.889         | 15.284          |
| 24               | 51.433                | 0.103            | 2.419         | 0.232           | 0.713            | 2.071          | 9.089             | 1.863           | 4.110           | 5.854            | 8.911          | 10.662          |
| 27               | 18.126                | 0.077            | 1.001         | 0.109           | 0.328            | 1.066          | 4.146             | 0.749           | 2.309           | 4.140            | 2.864          | 5.035           |
| 30               | 14.054                | 0.065            | 0.396         | 0.109           | 0.336            | 0.484          | 1.955             | 0.456           | 2.189           | 2.629            | 1.558          | 3.056           |
| 33               | 8.055                 | 0.042            | 0.276         | 0.066           | 0.212            | 0.498          | 1.343             | 0.252           | 1.294           | 1.588            | 1.181          | 1.979           |
| 36               | 2.751                 | 0.017            | 0.159         | 0.023           | 0.123            | 0.265          | 0.528             | 0.092           | 0.742           | 0.905            | 0.361          | 0.975           |
| 39               | 1.731                 | 0.010            | 0.081         | 0.009           | 0.076            | 0.170          | 0.264             | 0.040           | 0.517           | 0.599            | 0.148          | 0.617           |
| 42               | 1.041                 | 0.010            | 0.046         | 0.006           | 0.067            | 0.046          | 0.135             | 0.018           | 0.510           | 0.530            | 0.076          | 0.536           |
| 45               | 0.935                 | 0.013            | 0.020         | 0.004           | 0.075            | 0.023          | 0.074             | 0.011           | 0.581           | 0.589            | 0.048          | 0.591           |
| 48               | 0.667                 | 0.019            | 0.015         | 0.005           | 0.086            | 0.029          | 0.052             | 0.010           | 0.636           | 0.644            | 0.035          | 0.645           |
| 52               | 0.845                 | 0.020            | 0.016         | 0.007           | 0.099            | 0.040          | 0.053             | 0.012           | 0.831           | 0.839            | 0.040          | 0.840           |
| 56               | 0.280                 | 0.018            | 0.023         | 0.008           | 0.116            | 0.044          | 0.045             | 0.014           | 1.100           | 1.108            | 0.034          | 1.108           |
| 60               | -0.008                | 0.015            | 0.034         | 0.010           | 0.193            | 0.033          | 0.040             | 0.012           | 1.390           | 1.404            | 0.026          | 1.404           |
| 64               | -0.364                | 0.018            | 0.069         | 0.013           | 0.319            | 0.036          | 0.043             | 0.013           | 1.739           | 1.770            | 0.050          | 1.770           |
| 68               | -0.433                | 0.017            | 0.055         | 0.011           | 0.336            | 0.046          | 0.038             | 0.015           | 1.700           | 1.734            | 0.050          | 1.735           |

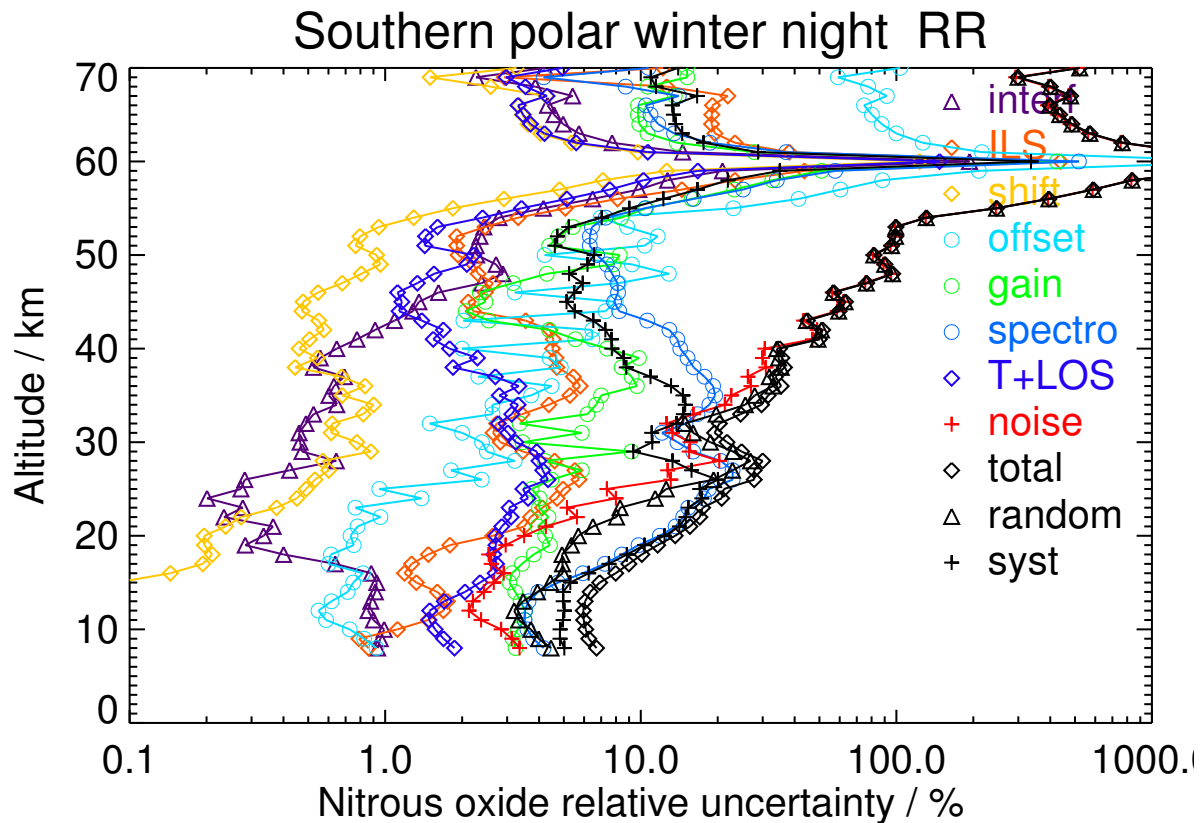**Figure S198.** V8R\_N2O\_261 Southern polar winter night

**Table S199.** Nitrous oxide error budget for Southern polar spring day. All uncertainties are  $1\sigma$ .

| altitude (km) | mean target (ppbv) | interf (ppbv) | ILS (ppbv) | shift (ppbv) | offset (ppbv) | gain (ppbv) | spectro (ppbv) | T+LOS (ppbv) | noise (ppbv) | random (ppbv) | syst (ppbv) | total (ppbv) |
|---------------|--------------------|---------------|------------|--------------|---------------|-------------|----------------|--------------|--------------|---------------|-------------|--------------|
| 9             | 327.618            | 5.382         | 3.541      | 0.331        | 2.687         | 9.296       | 16.710         | 6.218        | 11.122       | 15.261        | 18.545      | 24.017       |
| 12            | 289.163            | 2.776         | 6.375      | 0.568        | 1.600         | 8.358       | 16.593         | 5.407        | 6.981        | 13.311        | 17.239      | 21.780       |
| 15            | 228.985            | 1.188         | 4.415      | 0.563        | 1.601         | 4.618       | 15.547         | 5.959        | 6.398        | 11.726        | 15.026      | 19.060       |
| 18            | 166.758            | 0.366         | 4.308      | 0.465        | 0.794         | 5.384       | 18.557         | 4.251        | 3.465        | 10.149        | 17.887      | 20.566       |
| 21            | 117.948            | 0.197         | 3.887      | 0.419        | 0.540         | 5.045       | 13.703         | 2.000        | 2.548        | 9.388         | 12.297      | 15.471       |
| 24            | 107.660            | 0.102         | 2.010      | 0.263        | 0.547         | 2.360       | 11.837         | 1.679        | 2.942        | 9.061         | 8.914       | 12.711       |
| 27            | 98.715             | 0.124         | 1.153      | 0.343        | 0.300         | 2.134       | 9.921          | 1.163        | 1.752        | 7.178         | 7.578       | 10.438       |
| 30            | 86.066             | 0.058         | 0.558      | 0.555        | 0.387         | 3.903       | 8.896          | 1.278        | 1.854        | 6.586         | 7.540       | 10.011       |
| 33            | 51.847             | 0.078         | 0.884      | 0.394        | 0.186         | 2.333       | 6.796          | 0.864        | 1.241        | 4.971         | 5.495       | 7.409        |
| 36            | 20.120             | 0.065         | 1.077      | 0.154        | 0.110         | 0.821       | 3.091          | 0.356        | 0.776        | 2.405         | 2.525       | 3.487        |
| 39            | 8.349              | 0.022         | 0.473      | 0.063        | 0.076         | 0.549       | 1.011          | 0.132        | 0.483        | 0.961         | 0.941       | 1.345        |
| 42            | 4.244              | 0.013         | 0.191      | 0.025        | 0.046         | 0.165       | 0.414          | 0.056        | 0.368        | 0.478         | 0.385       | 0.614        |
| 45            | 2.838              | 0.011         | 0.060      | 0.014        | 0.048         | 0.083       | 0.172          | 0.027        | 0.379        | 0.398         | 0.169       | 0.433        |
| 48            | 2.315              | 0.016         | 0.033      | 0.011        | 0.066         | 0.057       | 0.126          | 0.018        | 0.450        | 0.461         | 0.126       | 0.477        |
| 52            | 1.558              | 0.018         | 0.028      | 0.009        | 0.073         | 0.032       | 0.093          | 0.012        | 0.575        | 0.582         | 0.088       | 0.589        |
| 56            | 1.098              | 0.020         | 0.045      | 0.020        | 0.096         | 0.071       | 0.096          | 0.014        | 0.858        | 0.869         | 0.092       | 0.873        |
| 60            | 0.606              | 0.019         | 0.070      | 0.010        | 0.151         | 0.055       | 0.065          | 0.014        | 1.192        | 1.204         | 0.079       | 1.207        |
| 64            | -0.152             | 0.050         | 0.302      | 0.082        | 0.279         | 0.434       | 0.230          | 0.045        | 1.591        | 1.660         | 0.444       | 1.718        |
| 68            | -0.186             | 0.064         | 0.409      | 0.118        | 0.298         | 0.507       | 0.327          | 0.055        | 1.608        | 1.699         | 0.582       | 1.796        |

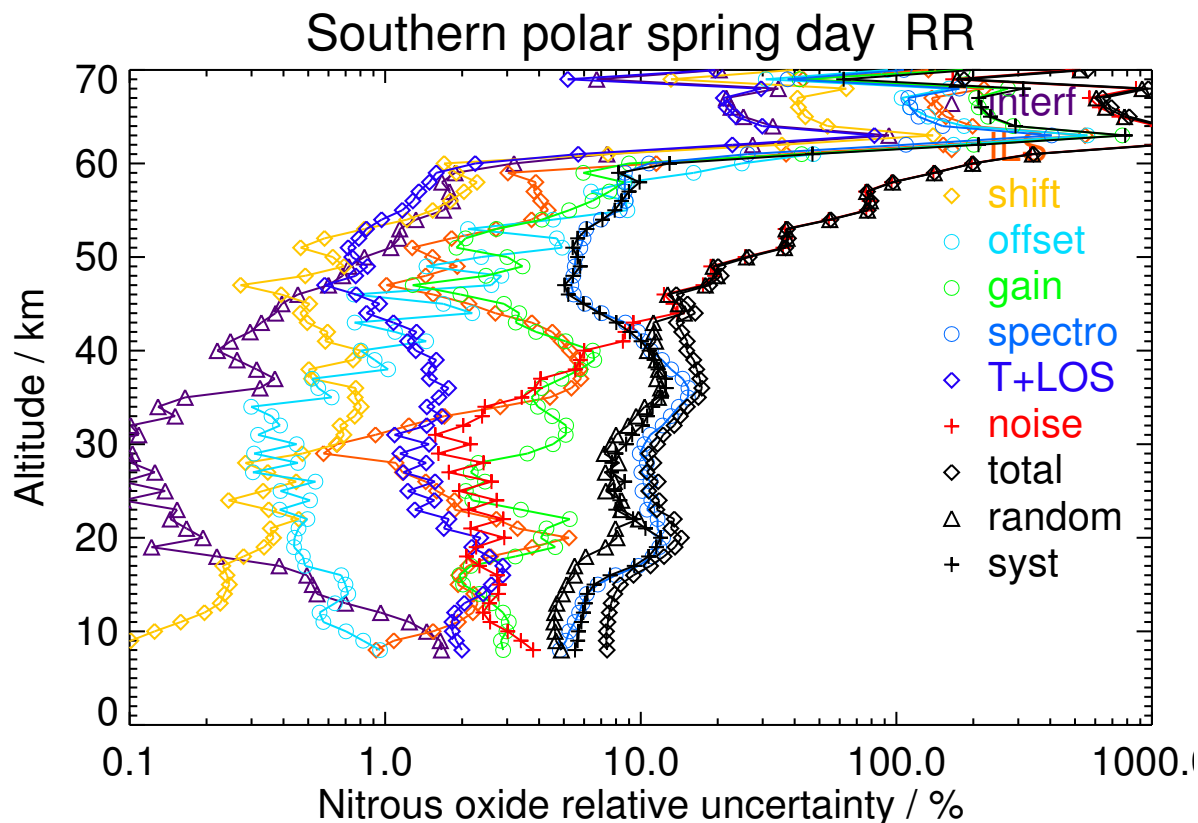

**Figure S199.** V8R\_N2O\_261 Southern polar spring day

**Table S200.** Nitrous oxide error budget for Southern polar spring night. All uncertainties are  $1\sigma$ .

| altitude (km) | mean target (ppbv) | interf (ppbv) | ILS (ppbv) | shift (ppbv) | offset (ppbv) | gain (ppbv) | spectro (ppbv) | T+LOS (ppbv) | noise (ppbv) | random (ppbv) | syst (ppbv) | total (ppbv) |
|---------------|--------------------|---------------|------------|--------------|---------------|-------------|----------------|--------------|--------------|---------------|-------------|--------------|
| 9             | 316.580            | 4.230         | 2.047      | 0.374        | 2.252         | 7.688       | 21.075         | 5.041        | 9.710        | 20.413        | 15.283      | 25.500       |
| 12            | 275.991            | 1.655         | 4.543      | 0.563        | 1.296         | 6.077       | 18.759         | 3.776        | 6.004        | 16.689        | 13.639      | 21.553       |
| 15            | 215.578            | 1.051         | 5.044      | 0.655        | 1.394         | 5.396       | 17.687         | 4.831        | 5.851        | 15.703        | 13.486      | 20.699       |
| 18            | 164.308            | 0.349         | 4.552      | 0.544        | 0.834         | 6.667       | 16.490         | 3.622        | 3.197        | 11.074        | 15.456      | 19.014       |
| 21            | 132.617            | 0.197         | 4.548      | 0.376        | 0.672         | 7.397       | 16.081         | 2.092        | 2.585        | 11.107        | 14.910      | 18.592       |
| 24            | 116.520            | 0.099         | 2.656      | 0.290        | 0.610         | 5.002       | 12.071         | 1.837        | 3.137        | 10.563        | 8.939       | 13.837       |
| 27            | 130.035            | 0.133         | 1.271      | 0.348        | 0.339         | 3.685       | 13.216         | 1.405        | 2.009        | 8.954         | 10.768      | 14.004       |
| 30            | 96.531             | 0.065         | 1.054      | 0.494        | 0.431         | 4.101       | 12.424         | 1.556        | 2.095        | 9.235         | 9.708       | 13.399       |
| 33            | 55.563             | 0.053         | 1.484      | 0.363        | 0.256         | 3.031       | 8.713          | 1.002        | 1.321        | 6.478         | 6.949       | 9.500        |
| 36            | 18.240             | 0.063         | 1.100      | 0.158        | 0.125         | 1.294       | 3.132          | 0.367        | 0.763        | 2.491         | 2.692       | 3.668        |
| 39            | 9.380              | 0.027         | 0.426      | 0.063        | 0.076         | 0.525       | 0.904          | 0.133        | 0.497        | 0.902         | 0.857       | 1.245        |
| 42            | 5.775              | 0.016         | 0.276      | 0.035        | 0.053         | 0.293       | 0.619          | 0.072        | 0.403        | 0.617         | 0.580       | 0.847        |
| 45            | 2.773              | 0.012         | 0.074      | 0.015        | 0.050         | 0.065       | 0.256          | 0.038        | 0.405        | 0.446         | 0.212       | 0.493        |
| 48            | 2.321              | 0.015         | 0.040      | 0.016        | 0.068         | 0.091       | 0.138          | 0.020        | 0.463        | 0.480         | 0.135       | 0.499        |
| 52            | 1.691              | 0.018         | 0.027      | 0.009        | 0.072         | 0.038       | 0.110          | 0.014        | 0.582        | 0.591         | 0.100       | 0.599        |
| 56            | 1.206              | 0.021         | 0.037      | 0.020        | 0.096         | 0.081       | 0.111          | 0.015        | 0.887        | 0.898         | 0.109       | 0.904        |
| 60            | 0.709              | 0.021         | 0.112      | 0.038        | 0.158         | 0.120       | 0.116          | 0.017        | 1.225        | 1.246         | 0.129       | 1.253        |
| 64            | 0.040              | 0.046         | 0.349      | 0.131        | 0.283         | 0.518       | 0.415          | 0.052        | 1.620        | 1.709         | 0.607       | 1.814        |
| 68            | -0.172             | 0.056         | 0.419      | 0.143        | 0.300         | 0.696       | 0.501          | 0.067        | 1.608        | 1.736         | 0.775       | 1.901        |

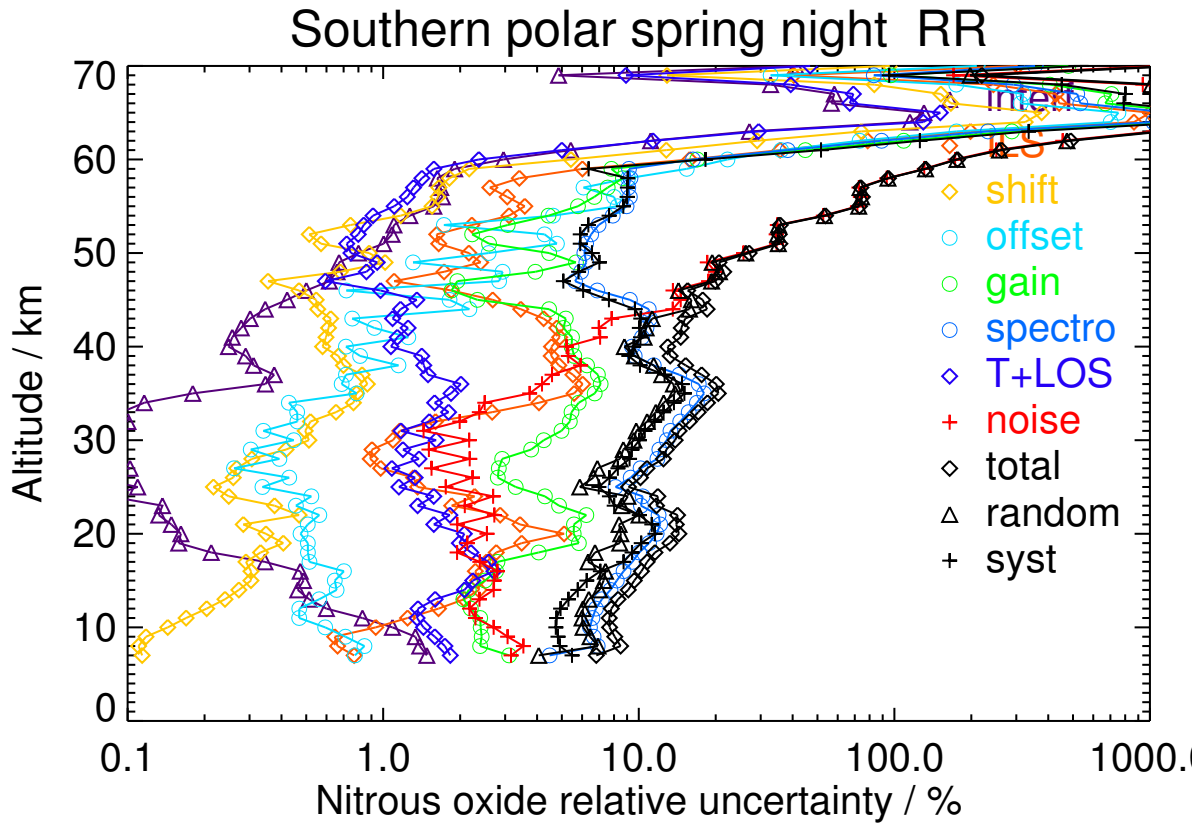

**Figure S200.** V8R\_N2O\_261 Southern polar spring night

**Table S201.** Nitrous oxide error budget for Southern polar summer day. All uncertainties are  $1\sigma$ .

| altitude (km) | mean target (ppbv) | interf (ppbv) | ILS (ppbv) | shift (ppbv) | offset (ppbv) | gain (ppbv) | spectro (ppbv) | T+LOS (ppbv) | noise (ppbv) | random (ppbv) | syst (ppbv) | total (ppbv) |
|---------------|--------------------|---------------|------------|--------------|---------------|-------------|----------------|--------------|--------------|---------------|-------------|--------------|
| 9             | 312.502            | 3.313         | 7.233      | 0.433        | 1.914         | 3.065       | 14.716         | 4.035        | 9.482        | 11.582        | 16.283      | 19.982       |
| 12            | 298.177            | 0.950         | 5.173      | 0.488        | 0.880         | 7.237       | 14.357         | 2.622        | 4.528        | 8.906         | 15.337      | 17.736       |
| 15            | 277.644            | 0.768         | 5.908      | 0.430        | 1.001         | 5.204       | 16.872         | 3.393        | 4.071        | 9.535         | 16.900      | 19.404       |
| 18            | 238.402            | 0.195         | 10.544     | 0.763        | 0.647         | 5.493       | 23.895         | 3.157        | 2.923        | 7.682         | 25.939      | 27.053       |
| 21            | 171.747            | 0.243         | 9.877      | 0.809        | 0.821         | 4.372       | 19.441         | 2.641        | 2.616        | 6.092         | 21.742      | 22.579       |
| 24            | 150.561            | 0.095         | 3.823      | 0.275        | 0.783         | 1.926       | 15.639         | 2.430        | 3.457        | 5.134         | 15.972      | 16.777       |
| 27            | 103.171            | 0.120         | 1.150      | 0.491        | 0.277         | 1.436       | 10.057         | 1.352        | 1.860        | 2.865         | 10.096      | 10.495       |
| 30            | 71.617             | 0.045         | 0.741      | 0.416        | 0.418         | 1.058       | 7.015          | 1.377        | 2.236        | 2.884         | 7.057       | 7.623        |
| 33            | 41.077             | 0.051         | 0.889      | 0.407        | 0.231         | 1.746       | 4.056          | 0.734        | 1.319        | 1.763         | 4.437       | 4.774        |
| 36            | 19.294             | 0.085         | 0.902      | 0.155        | 0.136         | 0.889       | 2.120          | 0.294        | 0.745        | 0.966         | 2.420       | 2.606        |
| 39            | 7.937              | 0.023         | 0.534      | 0.070        | 0.065         | 0.342       | 0.960          | 0.125        | 0.425        | 0.660         | 1.046       | 1.236        |
| 42            | 2.153              | 0.012         | 0.164      | 0.028        | 0.040         | 0.037       | 0.303          | 0.050        | 0.279        | 0.344         | 0.291       | 0.450        |
| 45            | 0.813              | 0.008         | 0.020      | 0.010        | 0.039         | 0.019       | 0.077          | 0.020        | 0.271        | 0.280         | 0.059       | 0.287        |
| 48            | 0.136              | 0.011         | 0.016      | 0.008        | 0.049         | 0.007       | 0.047          | 0.010        | 0.297        | 0.304         | 0.034       | 0.306        |
| 52            | 0.029              | 0.014         | 0.006      | 0.004        | 0.056         | 0.007       | 0.019          | 0.005        | 0.380        | 0.384         | 0.011       | 0.385        |
| 56            | -0.049             | 0.014         | 0.021      | 0.009        | 0.078         | 0.008       | 0.031          | 0.007        | 0.608        | 0.614         | 0.025       | 0.615        |
| 60            | -0.019             | 0.014         | 0.019      | 0.014        | 0.115         | 0.014       | 0.039          | 0.008        | 0.910        | 0.918         | 0.029       | 0.918        |
| 64            | -0.152             | 0.032         | 0.088      | 0.033        | 0.232         | 0.094       | 0.117          | 0.013        | 1.279        | 1.302         | 0.165       | 1.313        |
| 68            | -0.190             | 0.048         | 0.196      | 0.083        | 0.269         | 0.138       | 0.238          | 0.022        | 1.454        | 1.484         | 0.329       | 1.520        |

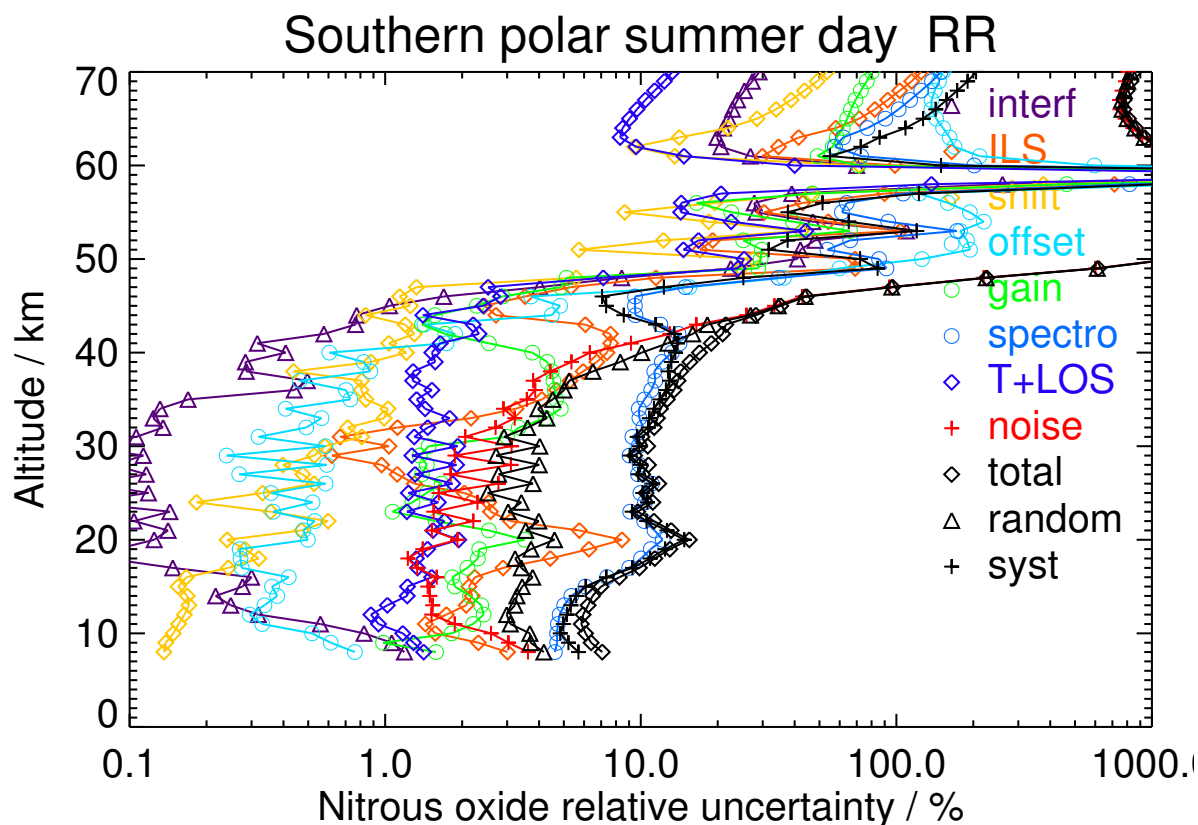

**Figure S201.** V8R\_N2O\_261 Southern polar summer day



**Table S202.** Nitrous oxide error budget for Southern polar summer night. All uncertainties are  $1\sigma$ .

| altitude (km) | mean target (ppbv) | interf (ppbv) | ILS (ppbv) | shift (ppbv) | offset (ppbv) | gain (ppbv) | spectro (ppbv) | T+LOS (ppbv) | noise (ppbv) | random (ppbv) | syst (ppbv) | total (ppbv) |
|---------------|--------------------|---------------|------------|--------------|---------------|-------------|----------------|--------------|--------------|---------------|-------------|--------------|
| 9             | 307.762            | 3.471         | 4.124      | 0.474        | 2.036         | 4.800       | 12.494         | 3.851        | 9.755        | 12.773        | 12.626      | 17.960       |
| 12            | 300.155            | 0.989         | 6.688      | 0.356        | 0.923         | 10.524      | 13.482         | 2.736        | 4.391        | 8.459         | 17.159      | 19.131       |
| 15            | 285.883            | 0.825         | 14.744     | 0.394        | 1.389         | 15.318      | 15.178         | 4.622        | 4.556        | 13.982        | 23.060      | 26.968       |
| 18            | 253.771            | 0.258         | 8.896      | 0.852        | 1.621         | 19.256      | 21.381         | 3.963        | 3.426        | 13.677        | 27.402      | 30.626       |
| 21            | 182.280            | 0.182         | 7.451      | 0.545        | 0.622         | 5.961       | 20.334         | 2.876        | 3.228        | 8.437         | 21.278      | 22.890       |
| 24            | 150.501            | 0.108         | 4.090      | 0.236        | 0.860         | 2.993       | 16.937         | 2.606        | 3.531        | 5.626         | 17.348      | 18.238       |
| 27            | 96.075             | 0.129         | 1.040      | 0.472        | 0.310         | 1.266       | 9.478          | 1.418        | 2.022        | 2.854         | 9.529       | 9.948        |
| 30            | 63.677             | 0.047         | 0.930      | 0.396        | 0.372         | 1.255       | 6.569          | 1.182        | 2.055        | 2.756         | 6.627       | 7.177        |
| 33            | 35.290             | 0.080         | 1.581      | 0.268        | 0.246         | 1.696       | 3.841          | 0.587        | 1.239        | 1.633         | 4.414       | 4.706        |
| 36            | 13.326             | 0.038         | 0.817      | 0.105        | 0.127         | 0.565       | 1.711          | 0.231        | 0.655        | 0.873         | 1.914       | 2.104        |
| 39            | 5.394              | 0.012         | 0.328      | 0.041        | 0.060         | 0.161       | 0.649          | 0.087        | 0.359        | 0.442         | 0.708       | 0.835        |
| 42            | 1.009              | 0.008         | 0.052      | 0.020        | 0.043         | 0.021       | 0.189          | 0.035        | 0.269        | 0.289         | 0.176       | 0.338        |
| 45            | 0.443              | 0.008         | 0.016      | 0.006        | 0.044         | 0.010       | 0.042          | 0.012        | 0.287        | 0.293         | 0.024       | 0.294        |
| 48            | 0.058              | 0.013         | 0.007      | 0.006        | 0.055         | 0.006       | 0.032          | 0.006        | 0.335        | 0.341         | 0.024       | 0.342        |
| 52            | -0.018             | 0.016         | 0.007      | 0.004        | 0.069         | 0.008       | 0.022          | 0.005        | 0.469        | 0.474         | 0.013       | 0.475        |
| 56            | 0.072              | 0.013         | 0.022      | 0.010        | 0.094         | 0.010       | 0.031          | 0.006        | 0.736        | 0.743         | 0.027       | 0.743        |
| 60            | -0.036             | 0.014         | 0.015      | 0.008        | 0.132         | 0.011       | 0.030          | 0.007        | 1.031        | 1.040         | 0.018       | 1.040        |
| 64            | 0.001              | 0.034         | 0.095      | 0.042        | 0.254         | 0.107       | 0.140          | 0.014        | 1.402        | 1.427         | 0.190       | 1.440        |
| 68            | 0.007              | 0.049         | 0.182      | 0.082        | 0.284         | 0.140       | 0.241          | 0.022        | 1.513        | 1.545         | 0.318       | 1.578        |

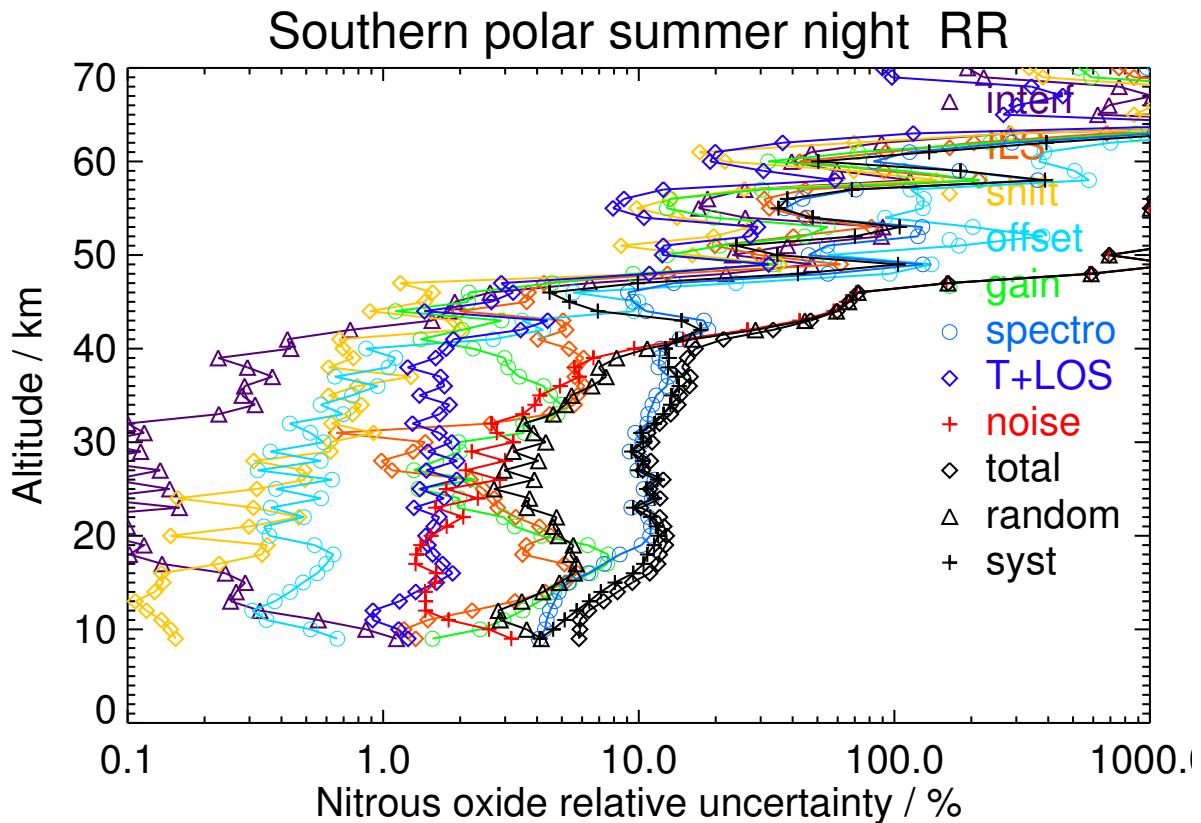

**Figure S202.** V8R\_N2O\_261 Southern polar summer night

**Table S203.** Nitrous oxide error budget for Southern polar autumn day. All uncertainties are  $1\sigma$ .

| altitude (km) | mean target (ppbv) | interf (ppbv) | ILS (ppbv) | shift (ppbv) | offset (ppbv) | gain (ppbv) | spectro (ppbv) | T+LOS (ppbv) | noise (ppbv) | random (ppbv) | syst (ppbv) | total (ppbv) |
|---------------|--------------------|---------------|------------|--------------|---------------|-------------|----------------|--------------|--------------|---------------|-------------|--------------|
| 12            | 309.987            | 4.628         | 6.199      | 0.192        | 1.028         | 9.890       | 13.770         | 3.264        | 4.816        | 8.215         | 17.740      | 19.550       |
| 15            | 285.655            | 3.768         | 6.804      | 0.297        | 1.352         | 8.277       | 15.778         | 4.808        | 5.233        | 8.803         | 18.785      | 20.745       |
| 18            | 239.379            | 0.325         | 2.849      | 0.709        | 0.870         | 11.586      | 22.128         | 3.868        | 3.729        | 7.125         | 24.728      | 25.734       |
| 21            | 171.486            | 0.343         | 3.724      | 0.285        | 0.790         | 9.778       | 20.683         | 2.555        | 3.368        | 5.764         | 22.864      | 23.579       |
| 24            | 116.691            | 0.130         | 2.764      | 0.296        | 0.754         | 6.016       | 14.485         | 2.539        | 4.179        | 5.778         | 15.647      | 16.680       |
| 27            | 64.207             | 0.111         | 1.480      | 0.136        | 0.302         | 1.747       | 9.731          | 1.382        | 2.558        | 3.505         | 9.809       | 10.417       |
| 30            | 26.898             | 0.039         | 0.353      | 0.113        | 0.398         | 0.777       | 4.585          | 0.885        | 2.381        | 2.836         | 4.509       | 5.327        |
| 33            | 8.813              | 0.046         | 0.246      | 0.068        | 0.242         | 0.675       | 1.779          | 0.374        | 1.455        | 1.788         | 1.675       | 2.450        |
| 36            | 1.139              | 0.016         | 0.109      | 0.030        | 0.084         | 0.289       | 0.363          | 0.098        | 0.653        | 0.756         | 0.314       | 0.819        |
| 39            | 0.210              | 0.010         | 0.031      | 0.011        | 0.038         | 0.103       | 0.102          | 0.029        | 0.446        | 0.471         | 0.037       | 0.473        |
| 42            | 0.167              | 0.008         | 0.018      | 0.004        | 0.046         | 0.024       | 0.061          | 0.010        | 0.496        | 0.502         | 0.019       | 0.503        |
| 45            | 0.206              | 0.011         | 0.010      | 0.003        | 0.067         | 0.019       | 0.043          | 0.007        | 0.617        | 0.622         | 0.016       | 0.623        |
| 48            | 0.408              | 0.015         | 0.017      | 0.006        | 0.095         | 0.045       | 0.052          | 0.011        | 0.739        | 0.747         | 0.044       | 0.749        |
| 52            | 0.512              | 0.019         | 0.021      | 0.008        | 0.099         | 0.043       | 0.070          | 0.012        | 0.886        | 0.894         | 0.053       | 0.895        |
| 56            | 0.123              | 0.015         | 0.021      | 0.011        | 0.121         | 0.070       | 0.053          | 0.017        | 1.161        | 1.169         | 0.070       | 1.171        |
| 60            | 0.642              | 0.012         | 0.027      | 0.011        | 0.210         | 0.065       | 0.058          | 0.018        | 1.447        | 1.463         | 0.067       | 1.465        |
| 64            | 0.142              | 0.013         | 0.030      | 0.008        | 0.336         | 0.062       | 0.054          | 0.017        | 1.771        | 1.804         | 0.045       | 1.805        |
| 68            | -0.523             | 0.013         | 0.031      | 0.006        | 0.356         | 0.098       | 0.050          | 0.019        | 1.738        | 1.776         | 0.075       | 1.778        |

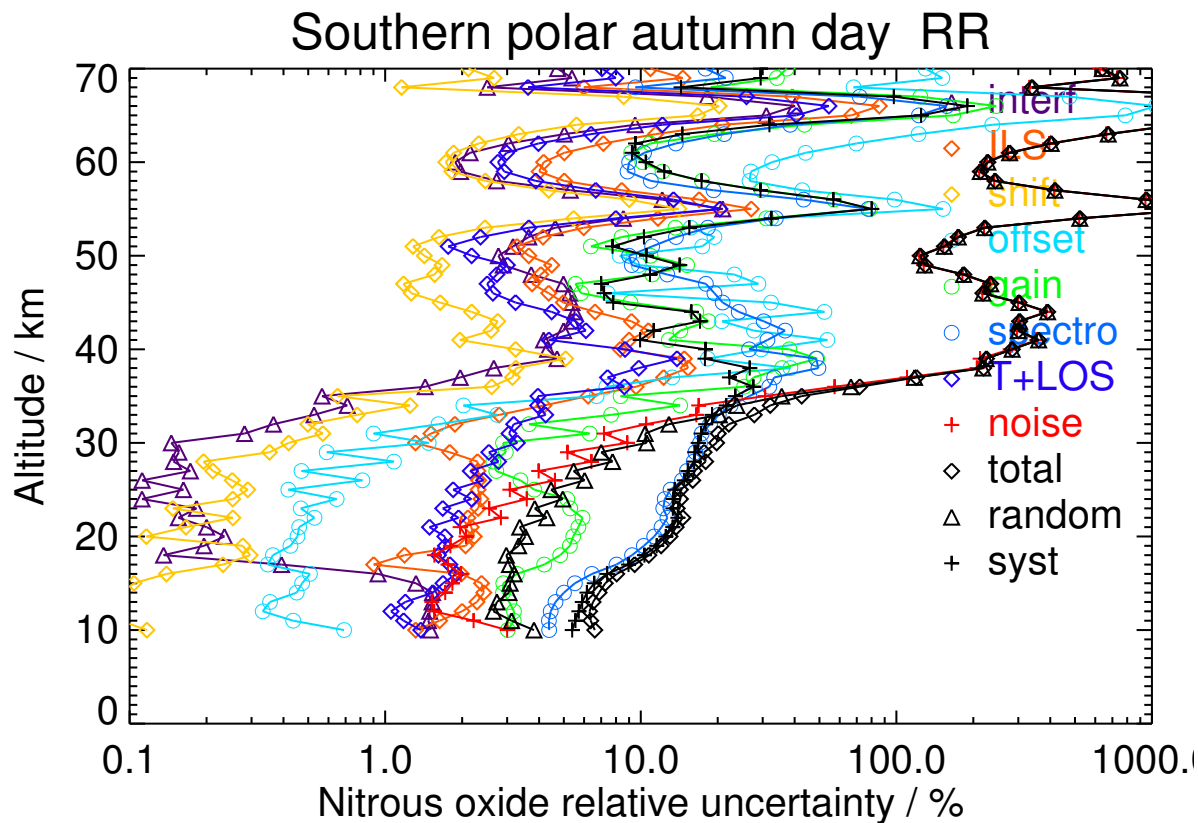

**Figure S203.** V8R\_N2O\_261 Southern polar autumn day



**Table S204.** Nitrous oxide error budget for Southern polar autumn night. All uncertainties are  $1\sigma$ .

| altitude (km) | mean target (ppbv) | interf (ppbv) | ILS (ppbv) | shift (ppbv) | offset (ppbv) | gain (ppbv) | spectro (ppbv) | T+LOS (ppbv) | noise (ppbv) | random (ppbv) | syst (ppbv) | total (ppbv) |
|---------------|--------------------|---------------|------------|--------------|---------------|-------------|----------------|--------------|--------------|---------------|-------------|--------------|
| 9             | 316.825            | 3.678         | 3.261      | 0.362        | 2.276         | 9.970       | 13.591         | 4.499        | 10.039       | 13.141        | 16.184      | 20.847       |
| 12            | 309.142            | 3.930         | 5.851      | 0.164        | 1.103         | 10.770      | 13.361         | 3.409        | 4.732        | 8.290         | 17.627      | 19.479       |
| 15            | 278.013            | 2.974         | 6.770      | 0.276        | 1.493         | 10.414      | 15.285         | 5.290        | 5.457        | 9.554         | 19.119      | 21.373       |
| 18            | 220.204            | 0.393         | 3.373      | 0.439        | 1.175         | 14.166      | 18.248         | 4.314        | 3.847        | 8.585         | 22.505      | 24.087       |
| 21            | 151.590            | 0.346         | 2.762      | 0.305        | 0.876         | 10.022      | 16.416         | 2.629        | 3.487        | 6.587         | 18.821      | 19.940       |
| 24            | 101.342            | 0.096         | 2.943      | 0.266        | 0.762         | 5.019       | 12.511         | 2.441        | 4.144        | 5.753         | 13.456      | 14.634       |
| 27            | 52.323             | 0.100         | 1.467      | 0.124        | 0.309         | 1.461       | 8.085          | 1.294        | 2.413        | 3.273         | 8.159       | 8.791        |
| 30            | 19.293             | 0.057         | 0.440      | 0.072        | 0.373         | 0.705       | 3.680          | 0.705        | 2.113        | 2.607         | 3.543       | 4.399        |
| 33            | 5.190              | 0.027         | 0.222      | 0.045        | 0.207         | 0.719       | 1.175          | 0.241        | 1.159        | 1.552         | 0.993       | 1.842        |
| 36            | 0.599              | 0.010         | 0.074      | 0.015        | 0.081         | 0.175       | 0.261          | 0.074        | 0.585        | 0.662         | 0.145       | 0.677        |
| 39            | 0.234              | 0.007         | 0.021      | 0.007        | 0.047         | 0.088       | 0.074          | 0.023        | 0.451        | 0.465         | 0.054       | 0.469        |
| 42            | 0.103              | 0.009         | 0.015      | 0.004        | 0.055         | 0.029       | 0.051          | 0.010        | 0.517        | 0.523         | 0.025       | 0.523        |
| 45            | 0.159              | 0.012         | 0.007      | 0.004        | 0.072         | 0.028       | 0.040          | 0.008        | 0.638        | 0.644         | 0.028       | 0.644        |
| 48            | 0.715              | 0.017         | 0.016      | 0.006        | 0.096         | 0.051       | 0.061          | 0.013        | 0.751        | 0.760         | 0.051       | 0.762        |
| 52            | 0.464              | 0.020         | 0.019      | 0.008        | 0.103         | 0.063       | 0.062          | 0.015        | 0.908        | 0.917         | 0.062       | 0.919        |
| 56            | 0.341              | 0.016         | 0.016      | 0.010        | 0.119         | 0.095       | 0.050          | 0.021        | 1.152        | 1.161         | 0.087       | 1.164        |
| 60            | 0.203              | 0.012         | 0.019      | 0.008        | 0.195         | 0.060       | 0.042          | 0.015        | 1.388        | 1.403         | 0.047       | 1.403        |
| 64            | -0.435             | 0.014         | 0.036      | 0.006        | 0.322         | 0.135       | 0.046          | 0.024        | 1.725        | 1.758         | 0.098       | 1.761        |
| 68            | -0.454             | 0.014         | 0.040      | 0.005        | 0.343         | 0.140       | 0.038          | 0.025        | 1.704        | 1.741         | 0.114       | 1.745        |

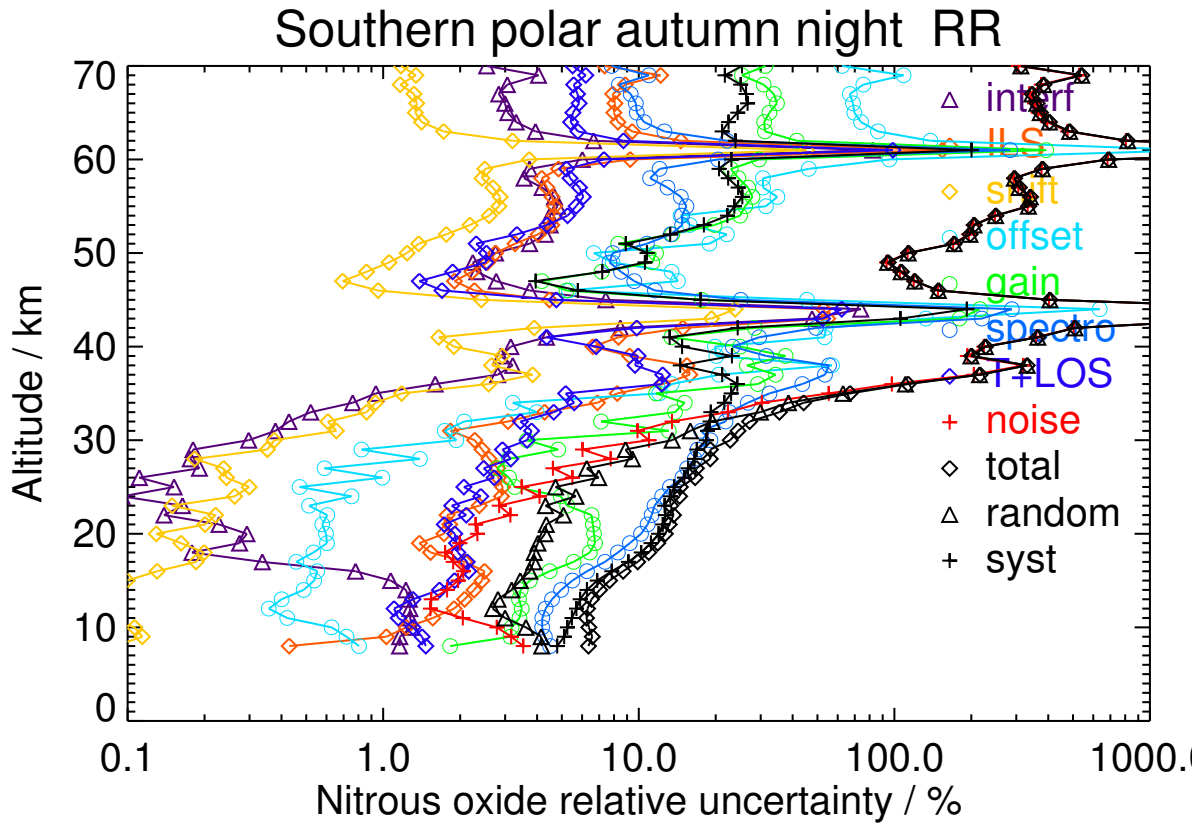

**Figure S204.** V8R\_N2O\_261 Southern polar autumn night

**S8 Nitrous oxide error contribution profile plots and  
tabulated values for RR MA data (V8R\_N2O\_561)**

**Table S205.** Nitrous oxide error budget for Northern polar winter day. All uncertainties are  $1\sigma$ .

| altitude (km) | mean target (ppbv) | NLTE (ppbv) | interf (ppbv) | ILS (ppbv) | shift (ppbv) | offset (ppbv) | gain (ppbv) | spectro (ppbv) | T+LOS (ppbv) | noise (ppbv) | random (ppbv) | syst (ppbv) | total (ppbv) |
|---------------|--------------------|-------------|---------------|------------|--------------|---------------|-------------|----------------|--------------|--------------|---------------|-------------|--------------|
| 30            | 93.802             | <0.001      | 0.216         | 1.998      | 0.343        | 0.994         | 8.294       | 11.719         | 1.437        | 2.168        | 5.927         | 13.524      | 14.766       |
| 35            | 27.866             | <0.001      | 0.080         | 0.740      | 0.064        | 0.187         | 1.038       | 4.353          | 0.496        | 1.419        | 2.608         | 4.009       | 4.783        |
| 40            | 7.630              | <0.001      | 0.023         | 0.134      | 0.017        | 0.136         | 0.209       | 0.758          | 0.104        | 1.017        | 1.115         | 0.675       | 1.304        |
| 45            | 3.606              | <0.001      | 0.014         | 0.076      | 0.012        | 0.052         | 0.121       | 0.388          | 0.047        | 0.858        | 0.873         | 0.387       | 0.955        |
| 50            | 0.227              | <0.001      | 0.017         | 0.041      | 0.013        | 0.078         | 0.067       | 0.093          | 0.017        | 1.025        | 1.030         | 0.097       | 1.035        |
| 55            | 0.666              | <0.001      | 0.017         | 0.012      | 0.005        | 0.165         | 0.028       | 0.052          | 0.012        | 1.337        | 1.349         | 0.029       | 1.349        |
| 60            | 0.468              | <0.001      | 0.017         | 0.046      | 0.014        | 0.337         | 0.105       | 0.055          | 0.019        | 1.716        | 1.751         | 0.092       | 1.754        |
| 65            | 0.205              | <0.001      | 0.016         | 0.054      | 0.017        | 0.332         | 0.104       | 0.049          | 0.017        | 1.478        | 1.517         | 0.097       | 1.520        |

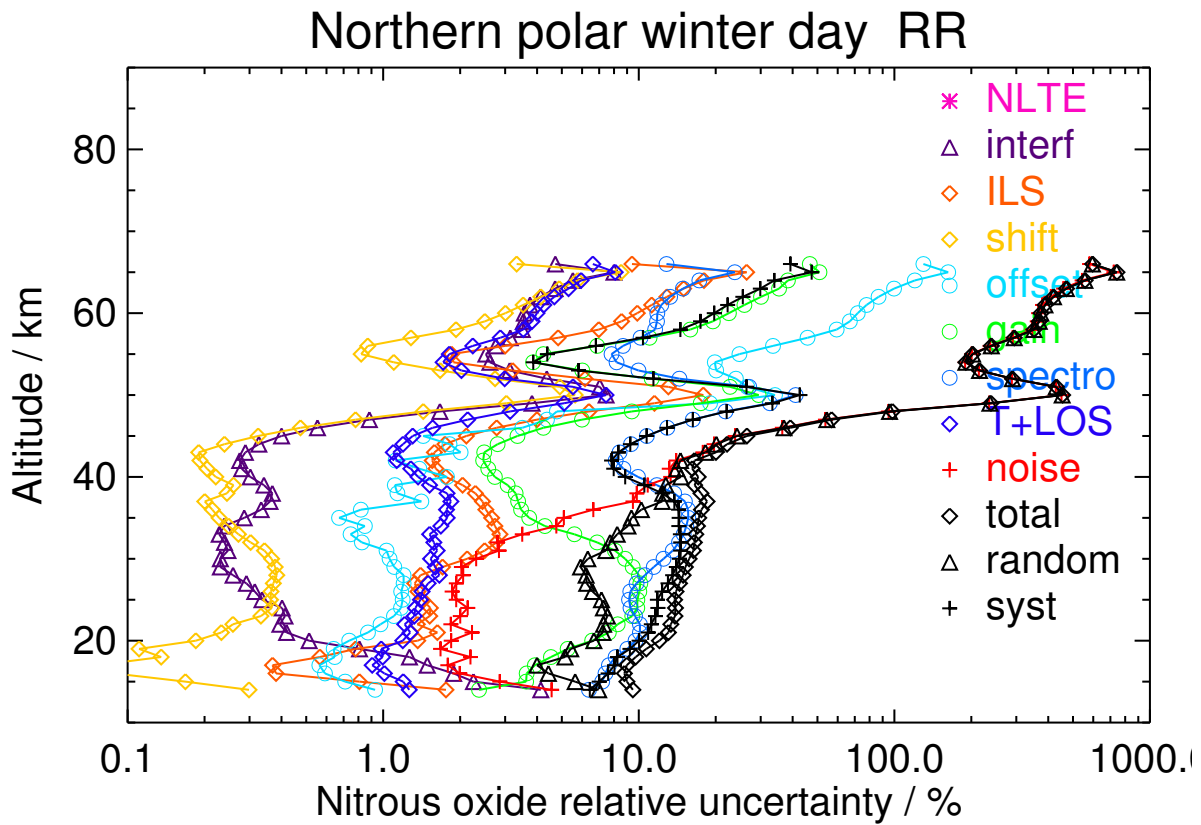

**Figure S205.** V8R\_N2O\_561 Northern polar winter day

**Table S206.** Nitrous oxide error budget for Northern polar winter night. All uncertainties are  $1\sigma$ .

| altitude (km) | mean target (ppbv) | NLTE (ppbv) | interf (ppbv) | ILS (ppbv) | shift (ppbv) | offset (ppbv) | gain (ppbv) | spectro (ppbv) | T+LOS (ppbv) | noise (ppbv) | random (ppbv) | syst (ppbv) | total (ppbv) |
|---------------|--------------------|-------------|---------------|------------|--------------|---------------|-------------|----------------|--------------|--------------|---------------|-------------|--------------|
| 30            | 35.026             | <0.001      | 0.110         | 1.137      | 0.176        | 0.572         | 4.668       | 7.901          | 0.621        | 1.477        | 7.423         | 5.775       | 9.405        |
| 35            | 12.720             | <0.001      | 0.051         | 0.406      | 0.037        | 0.149         | 0.807       | 2.706          | 0.216        | 1.023        | 2.565         | 1.636       | 3.043        |
| 40            | 3.464              | <0.001      | 0.019         | 0.095      | 0.012        | 0.114         | 0.113       | 0.706          | 0.055        | 0.838        | 1.031         | 0.420       | 1.113        |
| 45            | 1.225              | <0.001      | 0.013         | 0.023      | 0.007        | 0.052         | 0.064       | 0.182          | 0.019        | 0.733        | 0.751         | 0.114       | 0.760        |
| 50            | 0.384              | <0.001      | 0.017         | 0.019      | 0.006        | 0.071         | 0.029       | 0.080          | 0.012        | 0.901        | 0.907         | 0.044       | 0.908        |
| 55            | 0.480              | <0.001      | 0.016         | 0.020      | 0.010        | 0.133         | 0.078       | 0.052          | 0.014        | 1.204        | 1.215         | 0.047       | 1.216        |
| 60            | 0.518              | <0.001      | 0.011         | 0.027      | 0.011        | 0.269         | 0.084       | 0.050          | 0.015        | 1.492        | 1.519         | 0.051       | 1.519        |
| 65            | 0.107              | <0.001      | 0.011         | 0.026      | 0.007        | 0.302         | 0.047       | 0.035          | 0.010        | 1.428        | 1.460         | 0.024       | 1.461        |
| 70            | 0.805              | <0.001      | 0.007         | 0.002      | 0.002        | 0.233         | 0.009       | 0.021          | 0.004        | 1.019        | 1.045         | 0.023       | 1.046        |

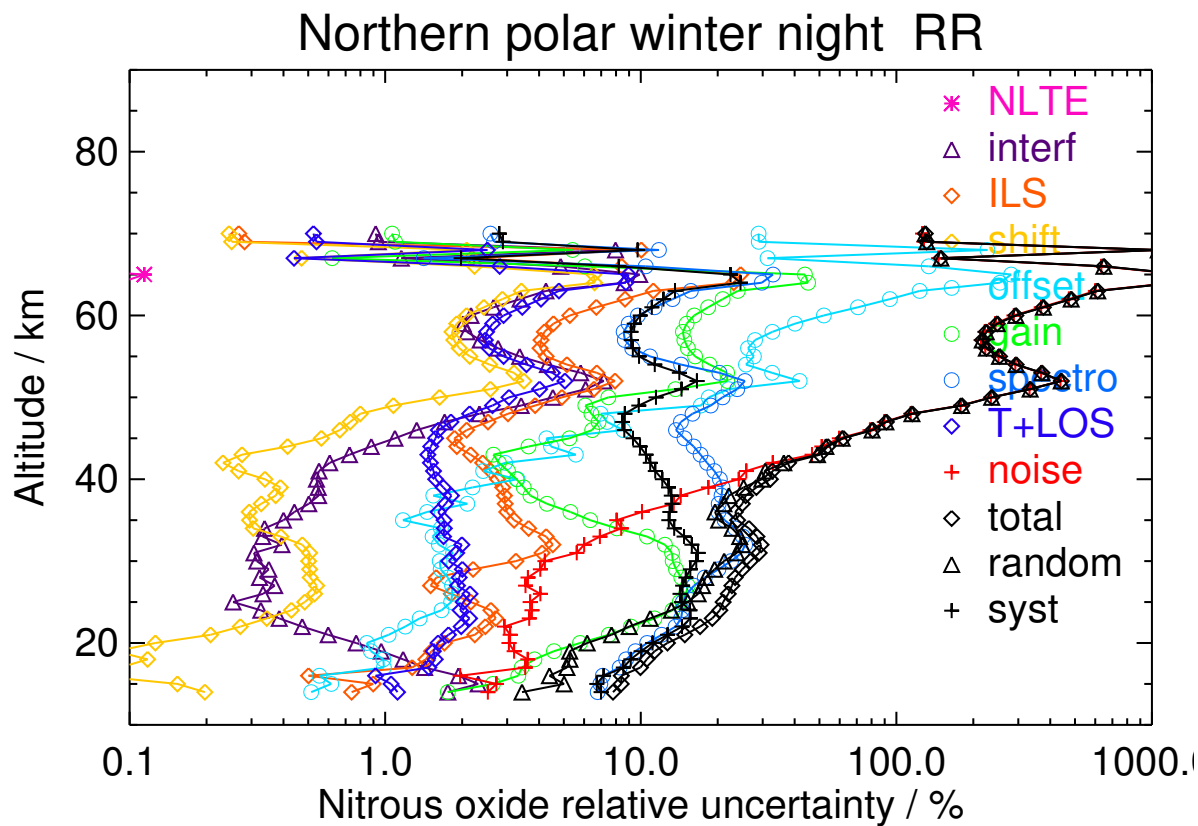

**Figure S206.** V8R\_N2O\_561 Northern polar winter night

**Table S207.** Nitrous oxide error budget for Northern polar spring day. All uncertainties are  $1\sigma$ .

| altitude (km) | mean target (ppbv) | NLTE (ppbv) | interf (ppbv) | ILS (ppbv) | shift (ppbv) | offset (ppbv) | gain (ppbv) | spectro (ppbv) | T+LOS (ppbv) | noise (ppbv) | random (ppbv) | syst (ppbv) | total (ppbv) |
|---------------|--------------------|-------------|---------------|------------|--------------|---------------|-------------|----------------|--------------|--------------|---------------|-------------|--------------|
| 30            | 56.373             | <0.001      | 0.079         | 0.967      | 0.264        | 0.433         | 1.561       | 7.191          | 1.233        | 2.132        | 3.325         | 7.097       | 7.837        |
| 35            | 12.630             | <0.001      | 0.069         | 0.350      | 0.053        | 0.123         | 0.220       | 1.703          | 0.316        | 1.013        | 1.151         | 1.702       | 2.055        |
| 40            | 3.008              | <0.001      | 0.011         | 0.058      | 0.009        | 0.079         | 0.067       | 0.301          | 0.046        | 0.470        | 0.495         | 0.287       | 0.573        |
| 45            | 0.577              | <0.001      | 0.011         | 0.015      | 0.004        | 0.055         | 0.018       | 0.075          | 0.010        | 0.433        | 0.443         | 0.027       | 0.444        |
| 50            | 0.568              | <0.001      | 0.016         | 0.021      | 0.004        | 0.026         | 0.015       | 0.065          | 0.009        | 0.498        | 0.502         | 0.044       | 0.504        |
| 55            | 0.323              | <0.001      | 0.017         | 0.017      | 0.006        | 0.090         | 0.010       | 0.038          | 0.007        | 0.881        | 0.887         | 0.024       | 0.887        |
| 60            | 0.845              | <0.001      | 0.012         | 0.029      | 0.005        | 0.138         | 0.021       | 0.052          | 0.010        | 1.071        | 1.081         | 0.041       | 1.082        |
| 65            | 1.266              | <0.001      | 0.023         | 0.098      | 0.011        | 0.249         | 0.028       | 0.054          | 0.012        | 1.332        | 1.358         | 0.083       | 1.361        |
| 70            | 0.829              | <0.001      | 0.010         | 0.005      | 0.002        | 0.218         | 0.006       | 0.020          | 0.005        | 1.011        | 1.034         | 0.021       | 1.035        |

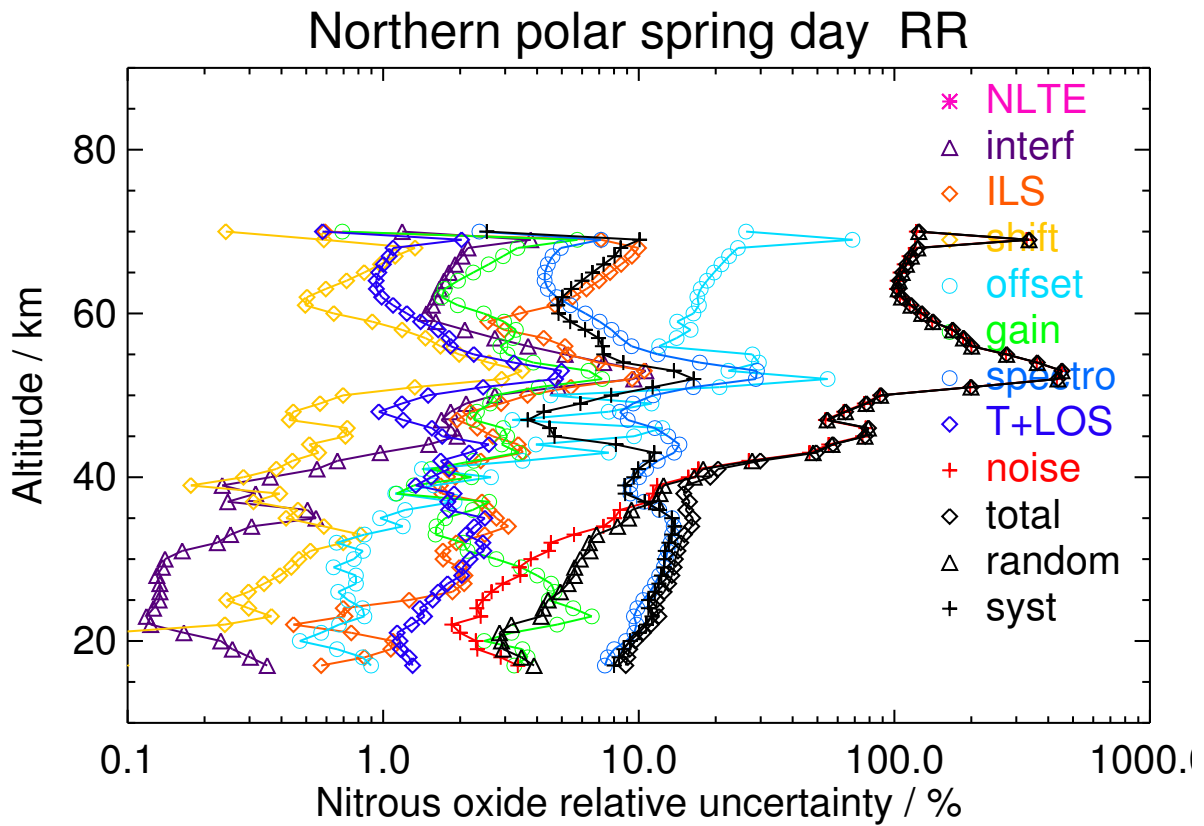

**Figure S207.** V8R\_N2O\_561 Northern polar spring day

**Table S208.** Nitrous oxide error budget for Northern polar spring night. All uncertainties are  $1\sigma$ .

| altitude (km) | mean target (ppbv) | NLTE (ppbv) | interf (ppbv) | ILS (ppbv) | shift (ppbv) | offset (ppbv) | gain (ppbv) | spectro (ppbv) | T+LOS (ppbv) | noise (ppbv) | random (ppbv) | syst (ppbv) | total (ppbv) |
|---------------|--------------------|-------------|---------------|------------|--------------|---------------|-------------|----------------|--------------|--------------|---------------|-------------|--------------|
| 30            | 57.928             | <0.001      | 0.077         | 0.954      | 0.266        | 0.412         | 1.209       | 7.252          | 1.206        | 2.071        | 3.182         | 7.129       | 7.807        |
| 35            | 15.353             | <0.001      | 0.077         | 0.435      | 0.057        | 0.124         | 0.200       | 2.091          | 0.347        | 1.008        | 1.166         | 2.099       | 2.401        |
| 40            | 3.814              | <0.001      | 0.012         | 0.056      | 0.010        | 0.082         | 0.077       | 0.320          | 0.050        | 0.473        | 0.504         | 0.300       | 0.587        |
| 45            | 0.707              | <0.001      | 0.011         | 0.022      | 0.005        | 0.053         | 0.026       | 0.104          | 0.013        | 0.427        | 0.439         | 0.069       | 0.445        |
| 50            | 0.603              | <0.001      | 0.016         | 0.017      | 0.004        | 0.032         | 0.013       | 0.068          | 0.008        | 0.511        | 0.516         | 0.032       | 0.517        |
| 55            | 0.300              | <0.001      | 0.017         | 0.021      | 0.007        | 0.092         | 0.013       | 0.046          | 0.008        | 0.903        | 0.909         | 0.030       | 0.909        |
| 60            | 0.371              | <0.001      | 0.013         | 0.029      | 0.006        | 0.146         | 0.020       | 0.040          | 0.009        | 1.097        | 1.107         | 0.028       | 1.108        |
| 65            | 0.258              | <0.001      | 0.022         | 0.090      | 0.011        | 0.255         | 0.022       | 0.040          | 0.008        | 1.345        | 1.371         | 0.070       | 1.373        |

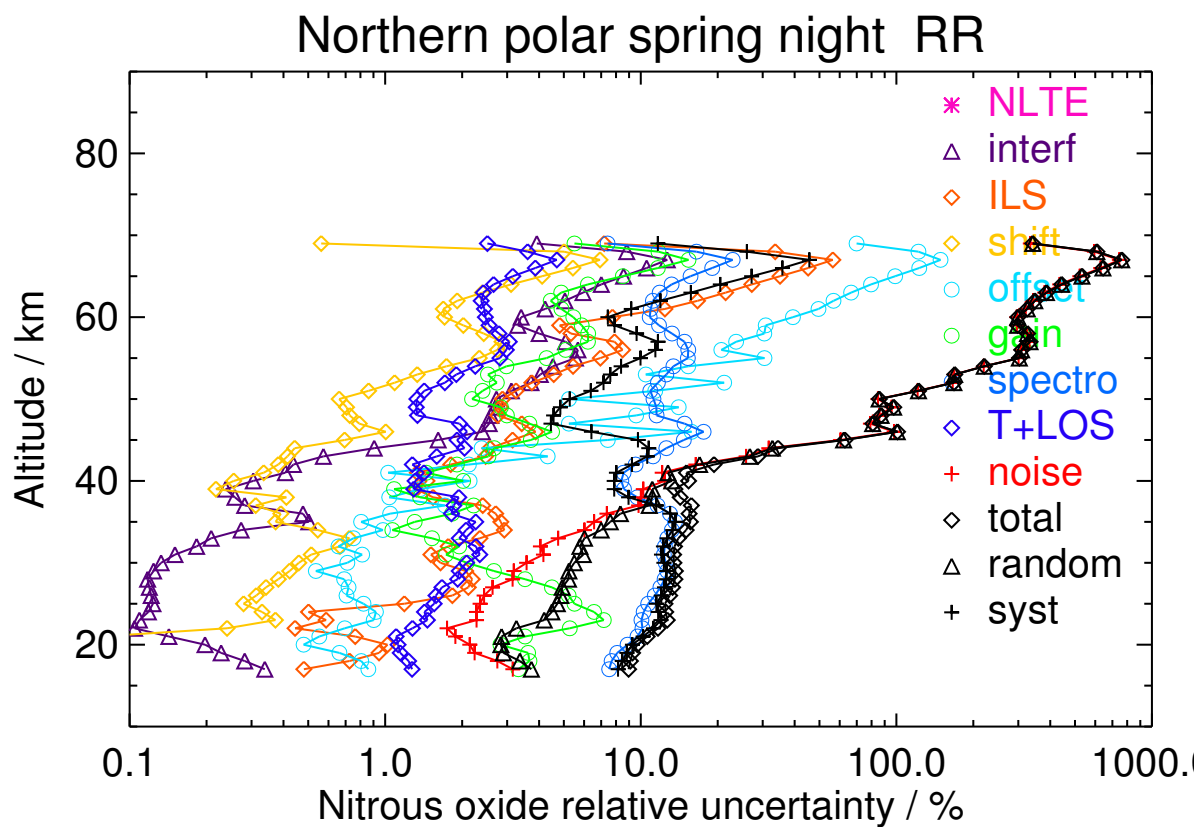

**Figure S208.** V8R\_N2O\_561 Northern polar spring night

**Table S209.** Nitrous oxide error budget for Northern polar summer day. All uncertainties are  $1\sigma$ .

| altitude<br>(km) | mean target<br>(ppbv) | NLTE<br>(ppbv) | interf<br>(ppbv) | ILS<br>(ppbv) | shift<br>(ppbv) | offset<br>(ppbv) | gain<br>(ppbv) | spectro<br>(ppbv) | T+LOS<br>(ppbv) | noise<br>(ppbv) | random<br>(ppbv) | syst<br>(ppbv) | total<br>(ppbv) |
|------------------|-----------------------|----------------|------------------|---------------|-----------------|------------------|----------------|-------------------|-----------------|-----------------|------------------|----------------|-----------------|
| 30               | 77.152                | <0.001         | 0.143            | 1.021         | 0.233           | 0.631            | 3.399          | 7.833             | 1.419           | 1.640           | 2.478            | 8.543          | 8.895           |
| 35               | 21.723                | <0.001         | 0.137            | 0.455         | 0.196           | 0.150            | 0.436          | 2.347             | 0.414           | 0.829           | 1.049            | 2.397          | 2.617           |
| 40               | 3.076                 | <0.001         | 0.021            | 0.012         | 0.014           | 0.056            | 0.064          | 0.307             | 0.056           | 0.308           | 0.338            | 0.293          | 0.447           |
| 45               | 0.545                 | <0.001         | 0.009            | 0.015         | 0.006           | 0.038            | 0.013          | 0.055             | 0.011           | 0.270           | 0.275            | 0.050          | 0.279           |
| 50               | 0.164                 | <0.001         | 0.013            | 0.007         | 0.003           | 0.018            | 0.009          | 0.027             | 0.006           | 0.318           | 0.320            | 0.012          | 0.321           |
| 55               | -0.032                | <0.001         | 0.020            | 0.010         | 0.004           | 0.091            | 0.007          | 0.032             | 0.008           | 0.688           | 0.695            | 0.012          | 0.695           |
| 60               | 0.404                 | <0.001         | 0.011            | 0.022         | 0.012           | 0.094            | 0.018          | 0.047             | 0.010           | 0.838           | 0.844            | 0.039          | 0.845           |
| 65               | 1.162                 | <0.001         | 0.032            | 0.118         | 0.025           | 0.192            | 0.051          | 0.077             | 0.014           | 1.151           | 1.168            | 0.143          | 1.177           |
| 70               | 0.802                 | <0.001         | 0.030            | 0.144         | 0.035           | 0.175            | 0.065          | 0.084             | 0.014           | 0.933           | 0.951            | 0.176          | 0.967           |

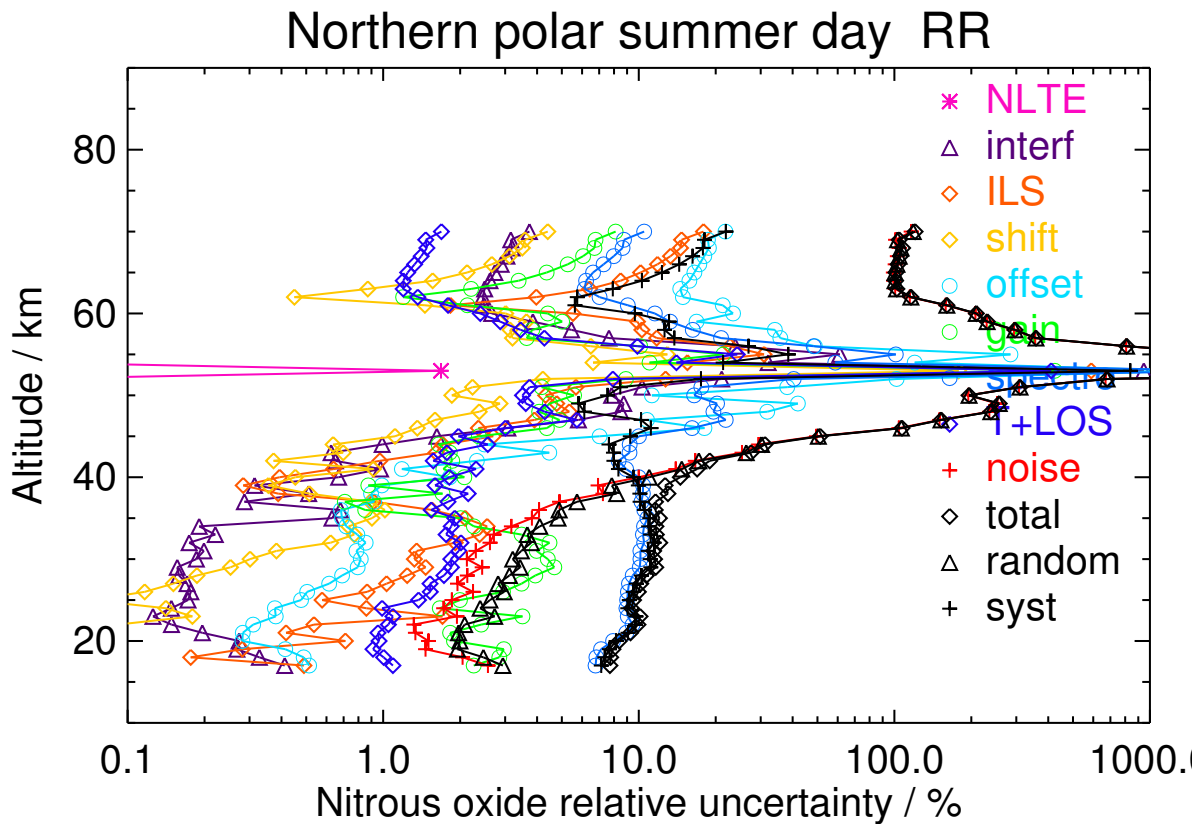**Figure S209.** V8R\_N2O\_561 Northern polar summer day

**Table S210.** Nitrous oxide error budget for Northern polar summer night. All uncertainties are  $1\sigma$ .

| altitude<br>(km) | mean target<br>(ppbv) | NLTE<br>(ppbv) | interf<br>(ppbv) | ILS<br>(ppbv) | shift<br>(ppbv) | offset<br>(ppbv) | gain<br>(ppbv) | spectro<br>(ppbv) | T+LOS<br>(ppbv) | noise<br>(ppbv) | random<br>(ppbv) | syst<br>(ppbv) | total<br>(ppbv) |
|------------------|-----------------------|----------------|------------------|---------------|-----------------|------------------|----------------|-------------------|-----------------|-----------------|------------------|----------------|-----------------|
| 30               | 61.379                | <0.001         | 0.102            | 1.075         | 0.291           | 0.547            | 2.423          | 7.377             | 1.227           | 1.621           | 2.370            | 7.769          | 8.122           |
| 35               | 10.084                | <0.001         | 0.055            | 0.283         | 0.071           | 0.131            | 0.418          | 1.543             | 0.289           | 0.798           | 0.954            | 1.572          | 1.839           |
| 40               | 1.077                 | <0.001         | 0.011            | 0.010         | 0.011           | 0.056            | 0.044          | 0.140             | 0.026           | 0.325           | 0.338            | 0.130          | 0.362           |
| 45               | 0.220                 | <0.001         | 0.009            | 0.011         | 0.003           | 0.048            | 0.013          | 0.034             | 0.007           | 0.352           | 0.357            | 0.022          | 0.357           |
| 50               | 0.117                 | <0.001         | 0.015            | 0.007         | 0.003           | 0.024            | 0.008          | 0.027             | 0.005           | 0.435           | 0.437            | 0.009          | 0.437           |
| 55               | 0.095                 | <0.001         | 0.020            | 0.014         | 0.006           | 0.094            | 0.014          | 0.040             | 0.008           | 0.851           | 0.857            | 0.027          | 0.858           |
| 60               | 0.377                 | <0.001         | 0.014            | 0.014         | 0.009           | 0.132            | 0.012          | 0.045             | 0.009           | 1.024           | 1.033            | 0.029          | 1.034           |
| 65               | 0.061                 | <0.001         | 0.024            | 0.097         | 0.013           | 0.241            | 0.101          | 0.051             | 0.021           | 1.320           | 1.343            | 0.143          | 1.351           |

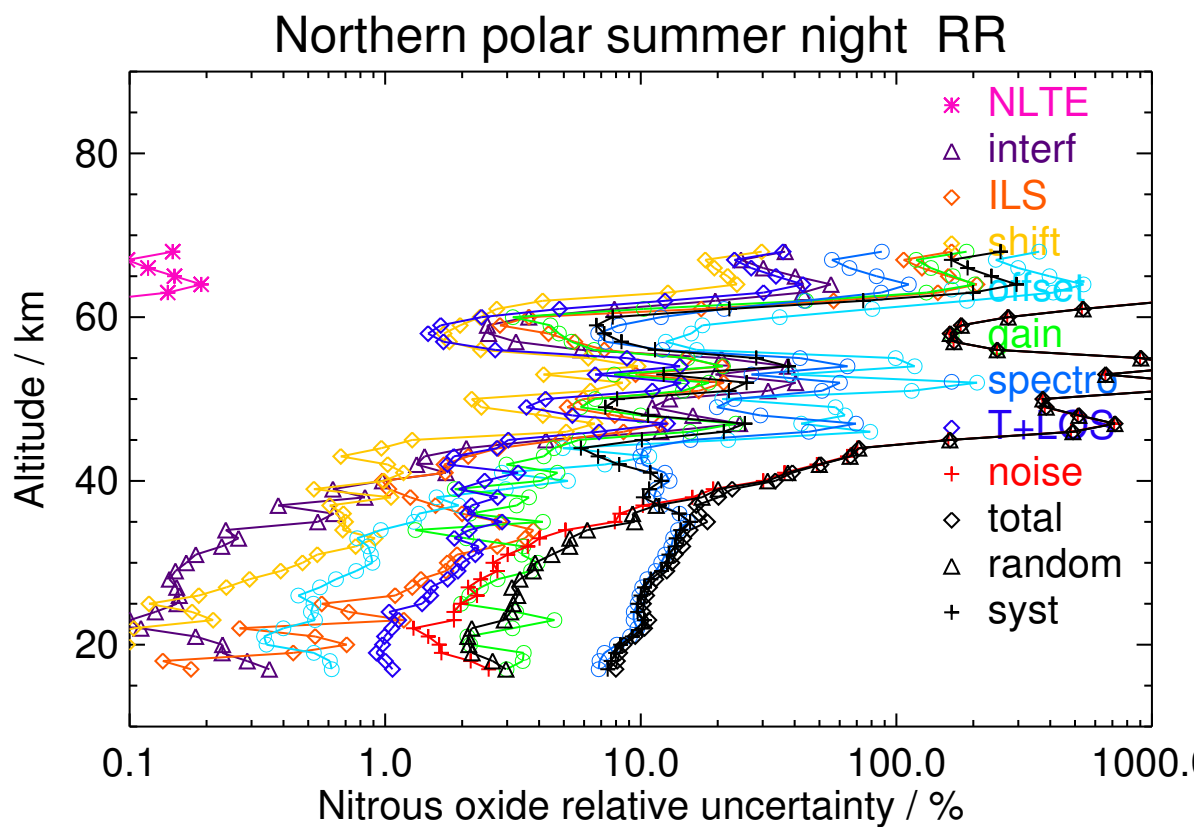

**Figure S210.** V8R\_N2O\_561 Northern polar summer night



**Table S211.** Nitrous oxide error budget for Northern polar autumn day. All uncertainties are  $1\sigma$ .

| altitude<br>(km) | mean target<br>(ppbv) | NLTE<br>(ppbv) | interf<br>(ppbv) | ILS<br>(ppbv) | shift<br>(ppbv) | offset<br>(ppbv) | gain<br>(ppbv) | spectro<br>(ppbv) | T+LOS<br>(ppbv) | noise<br>(ppbv) | random<br>(ppbv) | syst<br>(ppbv) | total<br>(ppbv) |
|------------------|-----------------------|----------------|------------------|---------------|-----------------|------------------|----------------|-------------------|-----------------|-----------------|------------------|----------------|-----------------|
| 30               | 35.758                | <0.001         | 0.149            | 1.068         | 0.194           | 0.305            | 0.955          | 6.073             | 0.849           | 1.625           | 3.197            | 5.677          | 6.515           |
| 35               | 5.031                 | <0.001         | 0.068            | 0.174         | 0.075           | 0.096            | 0.408          | 1.191             | 0.167           | 0.725           | 1.354            | 0.597          | 1.479           |
| 40               | 2.360                 | <0.001         | 0.021            | 0.104         | 0.033           | 0.087            | 0.168          | 0.635             | 0.039           | 0.560           | 0.849            | 0.213          | 0.876           |
| 45               | 0.909                 | <0.001         | 0.012            | 0.049         | 0.006           | 0.057            | 0.053          | 0.217             | 0.015           | 0.573           | 0.615            | 0.081          | 0.620           |
| 50               | 0.715                 | <0.001         | 0.018            | 0.023         | 0.006           | 0.045            | 0.022          | 0.075             | 0.011           | 0.700           | 0.705            | 0.037          | 0.706           |
| 55               | 0.726                 | <0.001         | 0.020            | 0.022         | 0.009           | 0.085            | 0.030          | 0.070             | 0.013           | 1.032           | 1.038            | 0.046          | 1.039           |
| 60               | 0.847                 | <0.001         | 0.015            | 0.035         | 0.012           | 0.198            | 0.032          | 0.061             | 0.014           | 1.301           | 1.318            | 0.044          | 1.319           |
| 65               | 0.488                 | <0.001         | 0.015            | 0.049         | 0.010           | 0.280            | 0.056          | 0.048             | 0.015           | 1.419           | 1.448            | 0.066          | 1.450           |
| 70               | -0.100                | <0.001         | 0.009            | 0.019         | 0.003           | 0.218            | 0.027          | 0.020             | 0.008           | 1.015           | 1.038            | 0.035          | 1.038           |

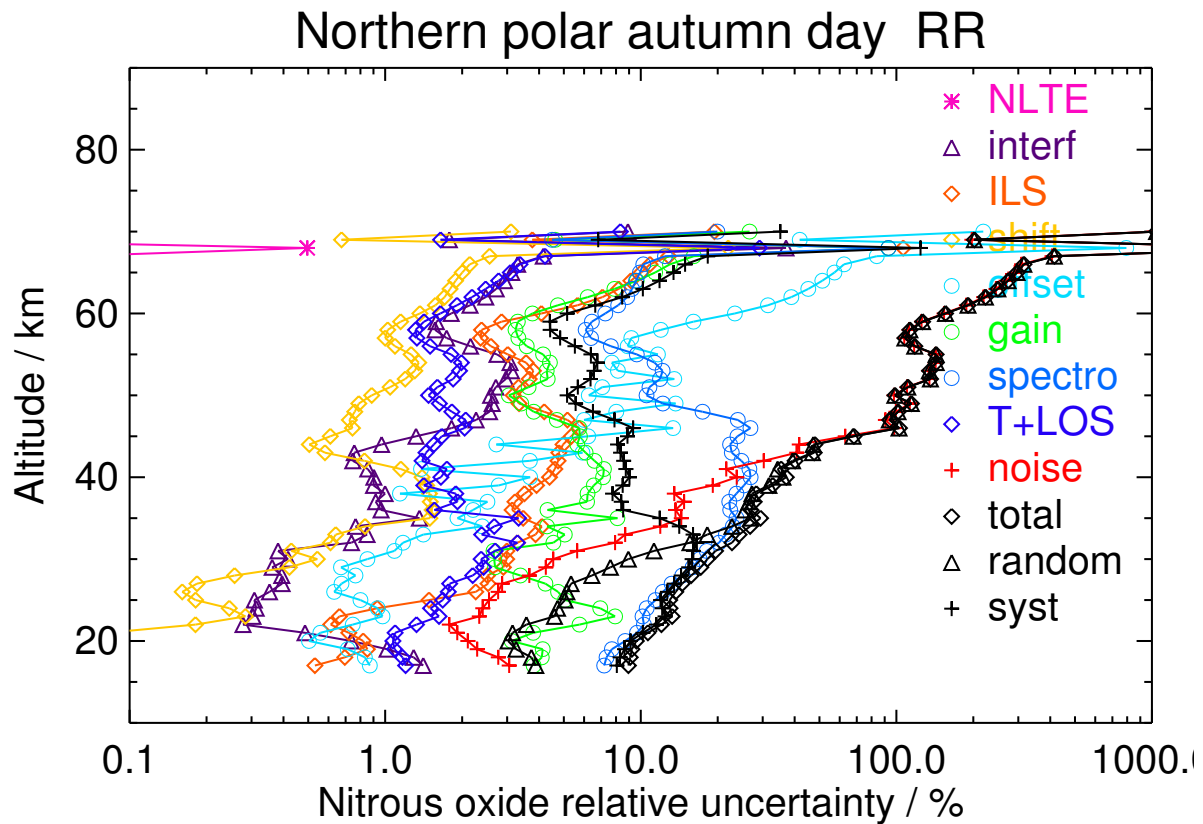**Figure S211.** V8R\_N2O\_561 Northern polar autumn day

**Table S212.** Nitrous oxide error budget for Northern polar autumn night. All uncertainties are  $1\sigma$ .

| altitude (km) | mean target (ppbv) | NLTE (ppbv) | interf (ppbv) | ILS (ppbv) | shift (ppbv) | offset (ppbv) | gain (ppbv) | spectro (ppbv) | T+LOS (ppbv) | noise (ppbv) | random (ppbv) | syst (ppbv) | total (ppbv) |
|---------------|--------------------|-------------|---------------|------------|--------------|---------------|-------------|----------------|--------------|--------------|---------------|-------------|--------------|
| 30            | 23.026             | <0.001      | 0.093         | 1.071      | 0.147        | 0.247         | 0.826       | 4.796          | 0.690        | 1.555        | 2.156         | 4.814       | 5.274        |
| 35            | 1.006              | <0.001      | 0.036         | 0.080      | 0.028        | 0.073         | 0.230       | 0.289          | 0.096        | 0.611        | 0.704         | 0.192       | 0.730        |
| 40            | 0.008              | <0.001      | 0.008         | 0.011      | 0.002        | 0.090         | 0.020       | 0.052          | 0.009        | 0.576        | 0.585         | 0.012       | 0.585        |
| 45            | 0.086              | <0.001      | 0.011         | 0.008      | 0.004        | 0.041         | 0.020       | 0.032          | 0.006        | 0.558        | 0.561         | 0.019       | 0.561        |
| 50            | 0.658              | <0.001      | 0.018         | 0.013      | 0.006        | 0.058         | 0.021       | 0.053          | 0.008        | 0.729        | 0.733         | 0.032       | 0.734        |
| 55            | 0.701              | <0.001      | 0.019         | 0.023      | 0.009        | 0.081         | 0.032       | 0.055          | 0.011        | 1.034        | 1.039         | 0.049       | 1.040        |
| 60            | 0.462              | <0.001      | 0.013         | 0.011      | 0.010        | 0.191         | 0.035       | 0.049          | 0.013        | 1.263        | 1.278         | 0.044       | 1.279        |
| 65            | 0.208              | <0.001      | 0.013         | 0.024      | 0.006        | 0.277         | 0.025       | 0.032          | 0.009        | 1.407        | 1.434         | 0.028       | 1.435        |
| 70            | -0.485             | <0.001      | 0.008         | 0.021      | 0.003        | 0.214         | 0.017       | 0.008          | 0.004        | 0.971        | 0.994         | 0.025       | 0.994        |

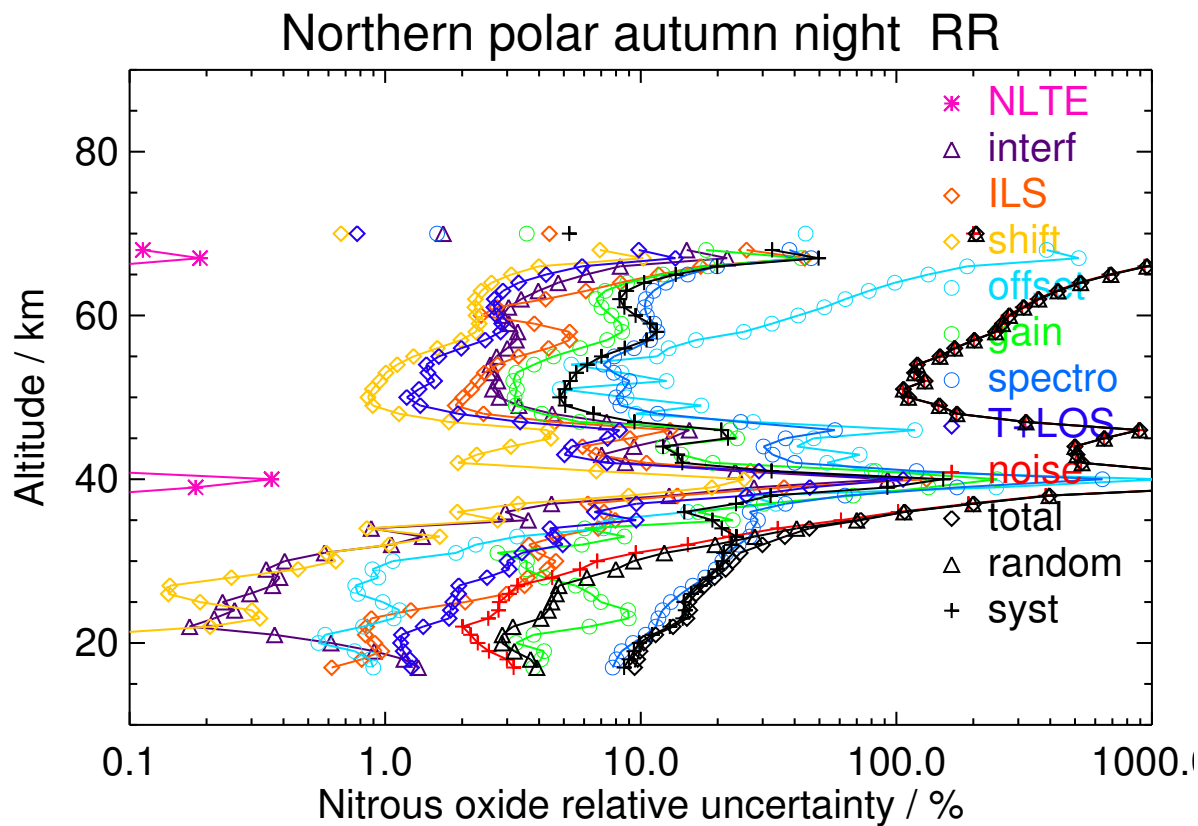

**Figure S212.** V8R\_N2O\_561 Northern polar autumn night

**Table S213.** Nitrous oxide error budget for Northern midlatitude winter day. All uncertainties are  $1\sigma$ .

| altitude (km) | mean target (ppbv) | NLTE (ppbv) | interf (ppbv) | ILS (ppbv) | shift (ppbv) | offset (ppbv) | gain (ppbv) | spectro (ppbv) | T+LOS (ppbv) | noise (ppbv) | random (ppbv) | syst (ppbv) | total (ppbv) |
|---------------|--------------------|-------------|---------------|------------|--------------|---------------|-------------|----------------|--------------|--------------|---------------|-------------|--------------|
| 30            | 80.332             | <0.001      | 0.199         | 1.653      | 0.256        | 0.616         | 3.213       | 9.627          | 1.383        | 2.038        | 5.062         | 9.310       | 10.597       |
| 35            | 30.810             | <0.001      | 0.137         | 0.467      | 0.167        | 0.182         | 0.384       | 3.881          | 0.492        | 1.215        | 2.175         | 3.534       | 4.150        |
| 40            | 7.964              | <0.001      | 0.030         | 0.122      | 0.029        | 0.126         | 0.166       | 0.636          | 0.092        | 0.778        | 0.892         | 0.531       | 1.038        |
| 45            | 4.441              | <0.001      | 0.014         | 0.081      | 0.013        | 0.039         | 0.098       | 0.456          | 0.043        | 0.555        | 0.593         | 0.429       | 0.732        |
| 50            | 0.515              | <0.001      | 0.016         | 0.025      | 0.007        | 0.060         | 0.020       | 0.088          | 0.014        | 0.692        | 0.700         | 0.042       | 0.702        |
| 55            | 0.351              | <0.001      | 0.015         | 0.022      | 0.011        | 0.087         | 0.022       | 0.055          | 0.009        | 1.032        | 1.038         | 0.036       | 1.038        |
| 60            | -0.081             | <0.001      | 0.021         | 0.046      | 0.008        | 0.210         | 0.045       | 0.051          | 0.012        | 1.329        | 1.347         | 0.056       | 1.348        |
| 65            | -0.108             | <0.001      | 0.038         | 0.088      | 0.023        | 0.286         | 0.089       | 0.068          | 0.017        | 1.421        | 1.452         | 0.119       | 1.457        |
| 70            | 1.172              | <0.001      | 0.030         | 0.061      | 0.016        | 0.235         | 0.016       | 0.062          | 0.010        | 1.040        | 1.068         | 0.067       | 1.071        |

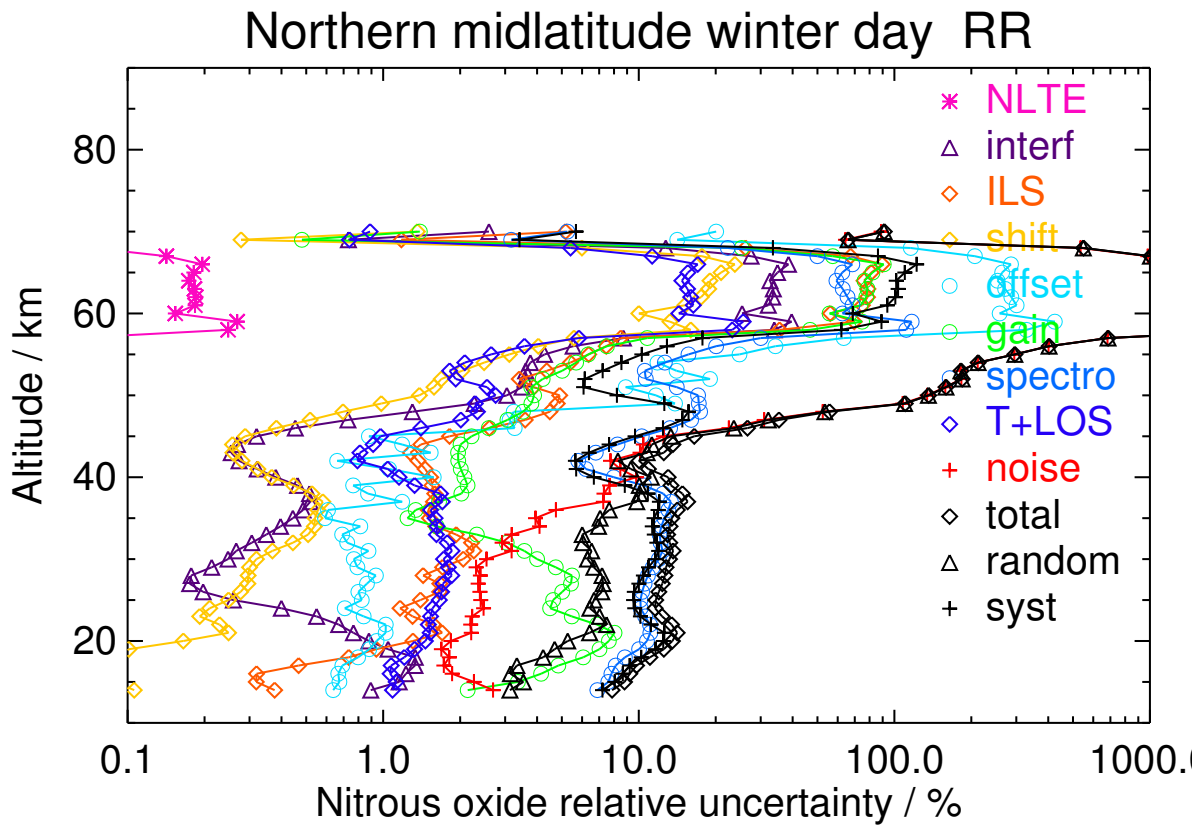

**Figure S213.** V8R\_N2O\_561 Northern midlatitude winter day

**Table S214.** Nitrous oxide error budget for Northern midlatitude winter night. All uncertainties are  $1\sigma$ .

| altitude (km) | mean target (ppbv) | NLTE (ppbv) | interf (ppbv) | ILS (ppbv) | shift (ppbv) | offset (ppbv) | gain (ppbv) | spectro (ppbv) | T+LOS (ppbv) | noise (ppbv) | random (ppbv) | syst (ppbv) | total (ppbv) |
|---------------|--------------------|-------------|---------------|------------|--------------|---------------|-------------|----------------|--------------|--------------|---------------|-------------|--------------|
| 30            | 87.428             | <0.001      | 0.194         | 2.037      | 0.329        | 0.708         | 5.001       | 10.471         | 1.498        | 2.059        | 6.343         | 10.281      | 12.081       |
| 35            | 29.281             | <0.001      | 0.148         | 0.784      | 0.197        | 0.249         | 0.887       | 4.424          | 0.527        | 1.390        | 2.555         | 4.096       | 4.827        |
| 40            | 8.187              | <0.001      | 0.031         | 0.131      | 0.034        | 0.080         | 0.183       | 0.638          | 0.091        | 0.667        | 0.810         | 0.513       | 0.959        |
| 45            | 5.153              | <0.001      | 0.015         | 0.092      | 0.014        | 0.061         | 0.097       | 0.477          | 0.051        | 0.556        | 0.601         | 0.447       | 0.749        |
| 50            | 1.055              | <0.001      | 0.017         | 0.038      | 0.006        | 0.085         | 0.033       | 0.154          | 0.018        | 0.752        | 0.769         | 0.091       | 0.774        |
| 55            | 0.442              | <0.001      | 0.016         | 0.026      | 0.011        | 0.066         | 0.041       | 0.065          | 0.011        | 0.960        | 0.964         | 0.059       | 0.966        |
| 60            | -0.024             | <0.001      | 0.020         | 0.068      | 0.009        | 0.214         | 0.045       | 0.048          | 0.012        | 1.349        | 1.368         | 0.053       | 1.369        |
| 65            | 0.065              | <0.001      | 0.031         | 0.110      | 0.017        | 0.291         | 0.093       | 0.059          | 0.015        | 1.422        | 1.455         | 0.121       | 1.460        |
| 70            | 0.110              | <0.001      | 0.030         | 0.092      | 0.015        | 0.233         | 0.031       | 0.043          | 0.007        | 1.016        | 1.043         | 0.104       | 1.048        |

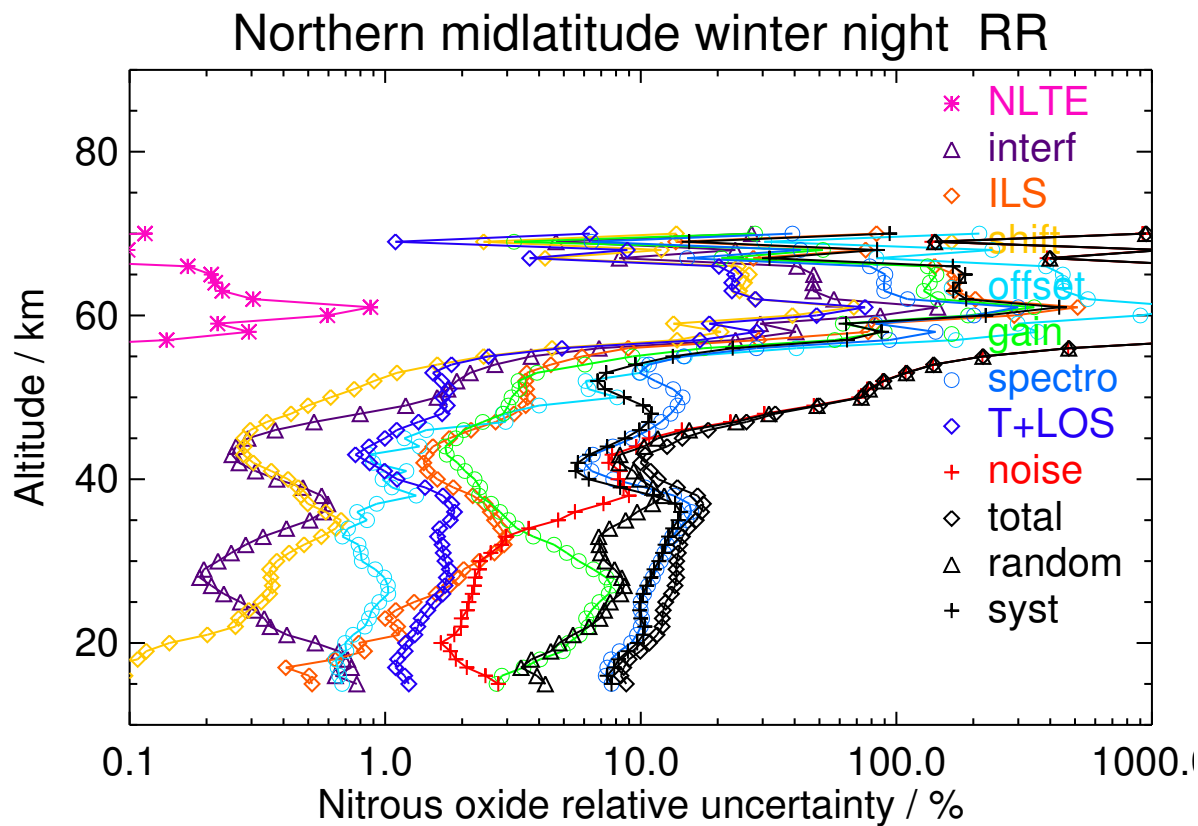

**Figure S214.** V8R\_N2O\_561 Northern midlatitude winter night

**Table S215.** Nitrous oxide error budget for Northern midlatitude spring day. All uncertainties are  $1\sigma$ .

| altitude (km) | mean target (ppbv) | NLTE (ppbv) | interf (ppbv) | ILS (ppbv) | shift (ppbv) | offset (ppbv) | gain (ppbv) | spectro (ppbv) | T+LOS (ppbv) | noise (ppbv) | random (ppbv) | syst (ppbv) | total (ppbv) |
|---------------|--------------------|-------------|---------------|------------|--------------|---------------|-------------|----------------|--------------|--------------|---------------|-------------|--------------|
| 30            | 89.615             | <0.001      | 0.205         | 0.945      | 0.358        | 0.656         | 2.164       | 9.372          | 1.713        | 2.143        | 3.600         | 9.411       | 10.076       |
| 35            | 27.108             | <0.001      | 0.161         | 0.496      | 0.225        | 0.169         | 0.555       | 3.164          | 0.477        | 0.987        | 1.601         | 3.051       | 3.445        |
| 40            | 9.691              | <0.001      | 0.049         | 0.064      | 0.098        | 0.088         | 0.223       | 0.839          | 0.104        | 0.553        | 0.840         | 0.623       | 1.046        |
| 45            | 4.253              | <0.001      | 0.014         | 0.059      | 0.013        | 0.078         | 0.081       | 0.327          | 0.033        | 0.514        | 0.568         | 0.257       | 0.624        |
| 50            | 2.242              | <0.001      | 0.017         | 0.045      | 0.006        | 0.019         | 0.039       | 0.170          | 0.020        | 0.521        | 0.534         | 0.143       | 0.552        |
| 55            | 1.088              | <0.001      | 0.019         | 0.039      | 0.011        | 0.076         | 0.022       | 0.100          | 0.015        | 0.861        | 0.867         | 0.088       | 0.871        |
| 60            | 0.242              | <0.001      | 0.018         | 0.054      | 0.009        | 0.157         | 0.017       | 0.049          | 0.010        | 1.163        | 1.175         | 0.055       | 1.176        |
| 65            | 0.712              | <0.001      | 0.046         | 0.180      | 0.036        | 0.259         | 0.077       | 0.095          | 0.016        | 1.366        | 1.394         | 0.197       | 1.408        |
| 70            | -1.031             | <0.001      | 0.024         | 0.085      | 0.014        | 0.213         | 0.040       | 0.040          | 0.006        | 0.988        | 1.011         | 0.102       | 1.016        |

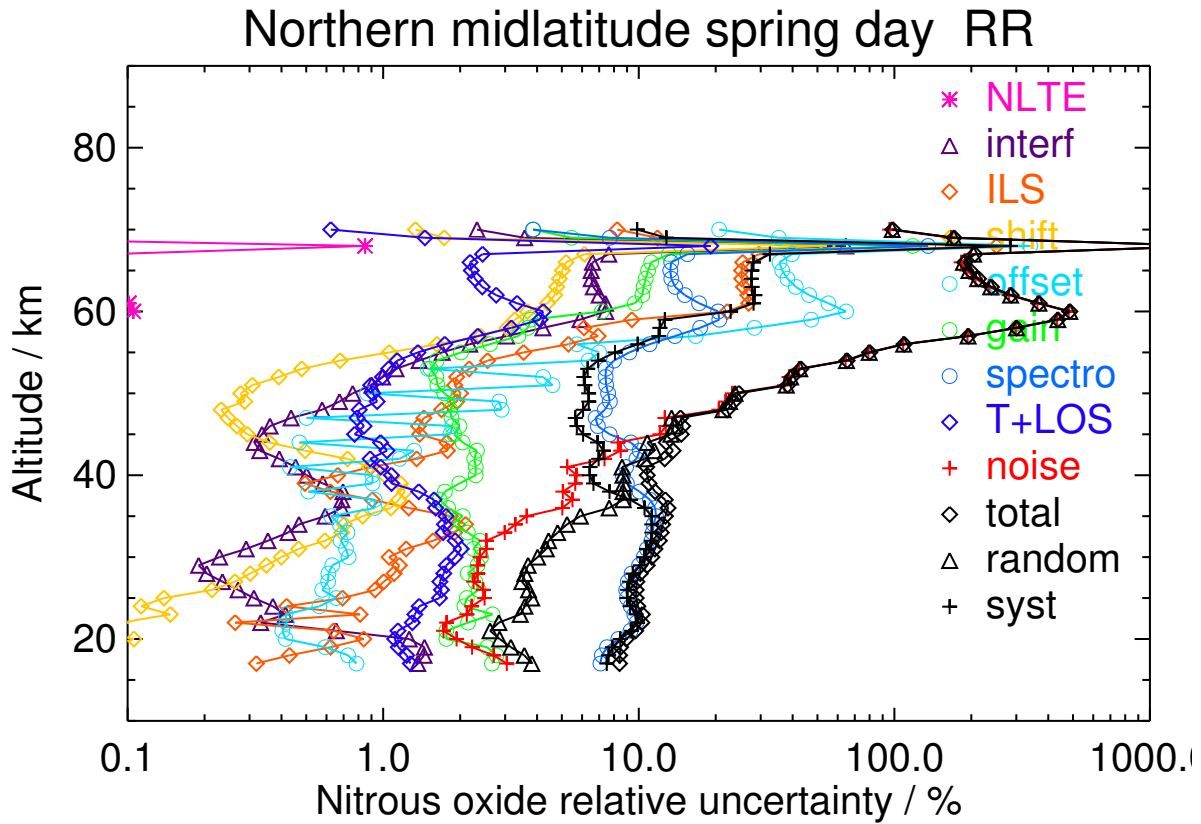

**Figure S215.** V8R\_N2O\_561 Northern midlatitude spring day

**Table S216.** Nitrous oxide error budget for Northern midlatitude spring night. All uncertainties are  $1\sigma$ .

| altitude (km) | mean target (ppbv) | NLTE (ppbv) | interf (ppbv) | ILS (ppbv) | shift (ppbv) | offset (ppbv) | gain (ppbv) | spectro (ppbv) | T+LOS (ppbv) | noise (ppbv) | random (ppbv) | syst (ppbv) | total (ppbv) |
|---------------|--------------------|-------------|---------------|------------|--------------|---------------|-------------|----------------|--------------|--------------|---------------|-------------|--------------|
| 30            | 86.958             | <0.001      | 0.190         | 1.216      | 0.354        | 0.535         | 1.587       | 9.428          | 1.592        | 2.140        | 3.286         | 9.469       | 10.023       |
| 35            | 23.578             | <0.001      | 0.155         | 0.502      | 0.207        | 0.154         | 0.278       | 2.919          | 0.461        | 1.022        | 1.562         | 2.785       | 3.193        |
| 40            | 7.832              | <0.001      | 0.044         | 0.052      | 0.097        | 0.091         | 0.226       | 0.747          | 0.089        | 0.536        | 0.794         | 0.544       | 0.962        |
| 45            | 2.372              | <0.001      | 0.013         | 0.055      | 0.010        | 0.060         | 0.074       | 0.266          | 0.023        | 0.450        | 0.508         | 0.168       | 0.535        |
| 50            | 1.466              | <0.001      | 0.017         | 0.036      | 0.005        | 0.026         | 0.030       | 0.130          | 0.014        | 0.512        | 0.523         | 0.098       | 0.532        |
| 55            | 0.817              | <0.001      | 0.018         | 0.025      | 0.009        | 0.088         | 0.017       | 0.077          | 0.012        | 0.899        | 0.906         | 0.045       | 0.907        |
| 60            | 0.489              | <0.001      | 0.016         | 0.041      | 0.008        | 0.154         | 0.015       | 0.055          | 0.011        | 1.138        | 1.150         | 0.044       | 1.151        |
| 65            | 0.271              | <0.001      | 0.037         | 0.126      | 0.027        | 0.259         | 0.046       | 0.073          | 0.012        | 1.360        | 1.389         | 0.116       | 1.394        |

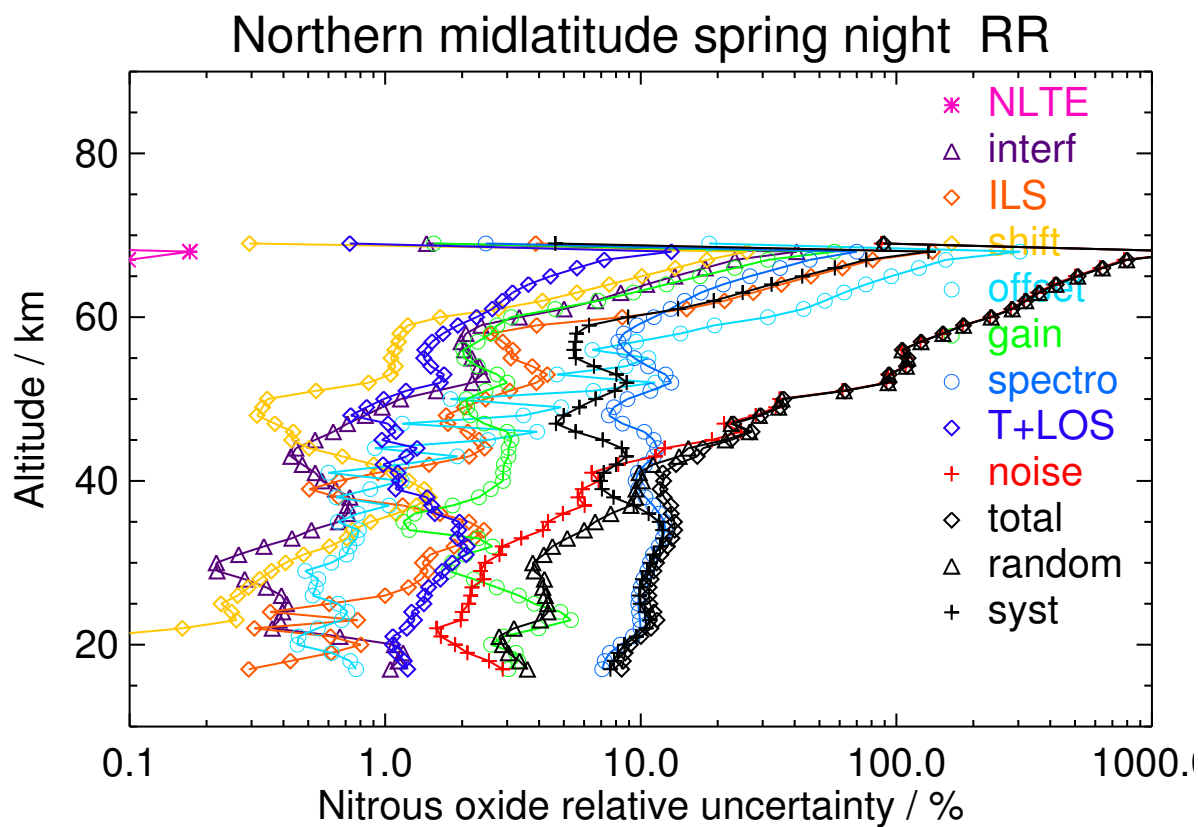

**Figure S216.** V8R\_N2O\_561 Northern midlatitude spring night

**Table S217.** Nitrous oxide error budget for Northern midlatitude summer day. All uncertainties are  $1\sigma$ .

| altitude (km) | mean target (ppbv) | NLTE (ppbv) | interf (ppbv) | ILS (ppbv) | shift (ppbv) | offset (ppbv) | gain (ppbv) | spectro (ppbv) | T+LOS (ppbv) | noise (ppbv) | random (ppbv) | syst (ppbv) | total (ppbv) |
|---------------|--------------------|-------------|---------------|------------|--------------|---------------|-------------|----------------|--------------|--------------|---------------|-------------|--------------|
| 30            | 80.160             | <0.001      | 0.176         | 1.008      | 0.271        | 0.627         | 2.930       | 7.729          | 1.494        | 1.753        | 2.771         | 8.214       | 8.669        |
| 35            | 22.005             | <0.001      | 0.148         | 0.474      | 0.195        | 0.140         | 0.328       | 2.517          | 0.418        | 0.841        | 1.191         | 2.492       | 2.762        |
| 40            | 3.336              | <0.001      | 0.019         | 0.021      | 0.013        | 0.061         | 0.069       | 0.360          | 0.061        | 0.357        | 0.399         | 0.333       | 0.520        |
| 45            | 1.288              | <0.001      | 0.010         | 0.022      | 0.005        | 0.059         | 0.028       | 0.131          | 0.012        | 0.375        | 0.394         | 0.087       | 0.403        |
| 50            | 0.441              | <0.001      | 0.015         | 0.013      | 0.004        | 0.014         | 0.010       | 0.063          | 0.008        | 0.413        | 0.419         | 0.021       | 0.419        |
| 55            | 1.001              | <0.001      | 0.019         | 0.029      | 0.009        | 0.080         | 0.026       | 0.108          | 0.012        | 0.766        | 0.777         | 0.049       | 0.779        |
| 60            | 1.251              | <0.001      | 0.016         | 0.036      | 0.008        | 0.131         | 0.012       | 0.079          | 0.014        | 1.045        | 1.055         | 0.060       | 1.057        |
| 65            | 0.896              | <0.001      | 0.056         | 0.196      | 0.038        | 0.235         | 0.101       | 0.106          | 0.021        | 1.311        | 1.336         | 0.234       | 1.356        |

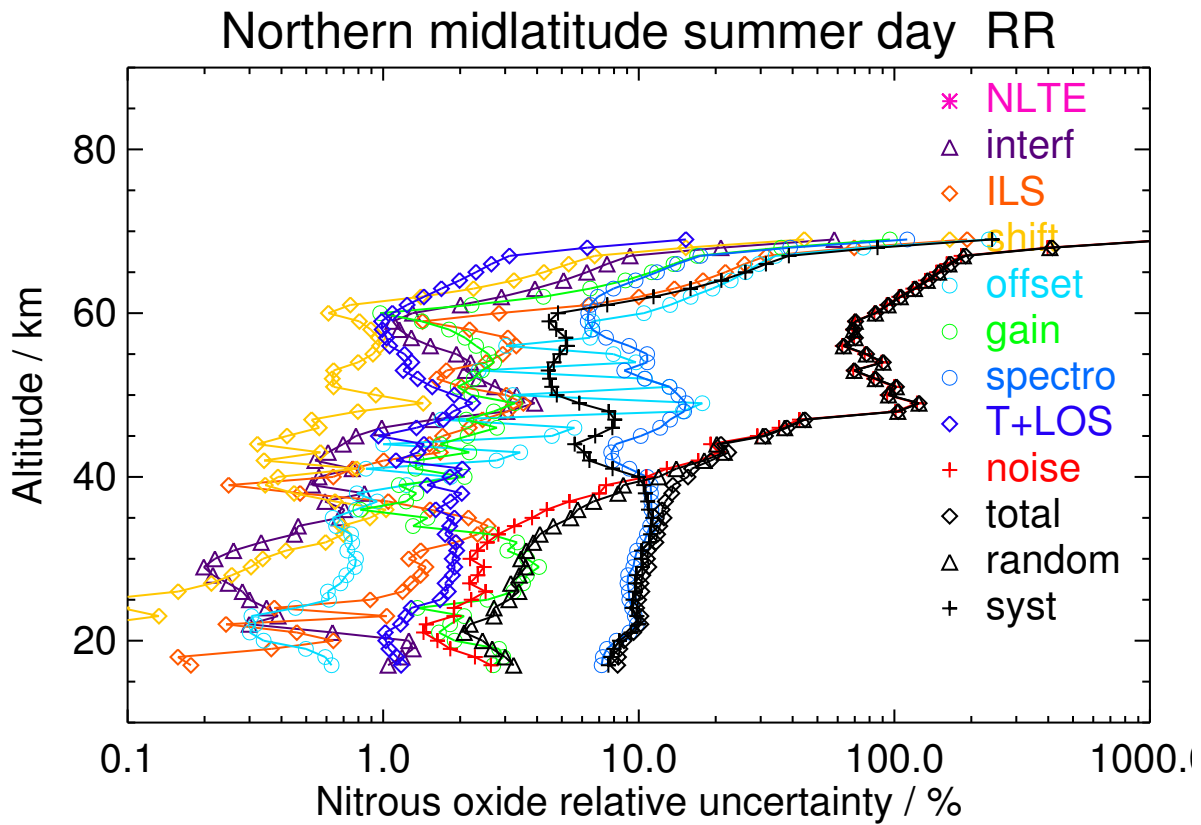

**Figure S217.** V8R\_N2O\_561 Northern midlatitude summer day

**Table S218.** Nitrous oxide error budget for Northern midlatitude summer night. All uncertainties are  $1\sigma$ .

| altitude (km) | mean target (ppbv) | NLTE (ppbv) | interf (ppbv) | ILS (ppbv) | shift (ppbv) | offset (ppbv) | gain (ppbv) | spectro (ppbv) | T+LOS (ppbv) | noise (ppbv) | random (ppbv) | syst (ppbv) | total (ppbv) |
|---------------|--------------------|-------------|---------------|------------|--------------|---------------|-------------|----------------|--------------|--------------|---------------|-------------|--------------|
| 30            | 84.798             | <0.001      | 0.187         | 0.996      | 0.267        | 0.598         | 2.336       | 8.690          | 1.524        | 1.752        | 2.736         | 8.963       | 9.371        |
| 35            | 22.942             | <0.001      | 0.169         | 0.466      | 0.226        | 0.129         | 0.177       | 2.599          | 0.416        | 0.848        | 1.235         | 2.543       | 2.827        |
| 40            | 3.433              | <0.001      | 0.023         | 0.017      | 0.029        | 0.062         | 0.077       | 0.421          | 0.062        | 0.353        | 0.442         | 0.349       | 0.563        |
| 45            | 1.248              | <0.001      | 0.011         | 0.016      | 0.011        | 0.049         | 0.035       | 0.113          | 0.013        | 0.334        | 0.353         | 0.062       | 0.359        |
| 50            | 0.434              | <0.001      | 0.015         | 0.023      | 0.005        | 0.018         | 0.019       | 0.103          | 0.009        | 0.389        | 0.403         | 0.026       | 0.404        |
| 55            | 1.584              | <0.001      | 0.019         | 0.026      | 0.008        | 0.090         | 0.022       | 0.089          | 0.012        | 0.791        | 0.800         | 0.059       | 0.802        |
| 60            | 1.358              | <0.001      | 0.015         | 0.027      | 0.010        | 0.125         | 0.017       | 0.092          | 0.013        | 0.994        | 1.004         | 0.071       | 1.007        |
| 65            | 0.692              | <0.001      | 0.058         | 0.192      | 0.035        | 0.231         | 0.054       | 0.095          | 0.016        | 1.299        | 1.322         | 0.215       | 1.340        |

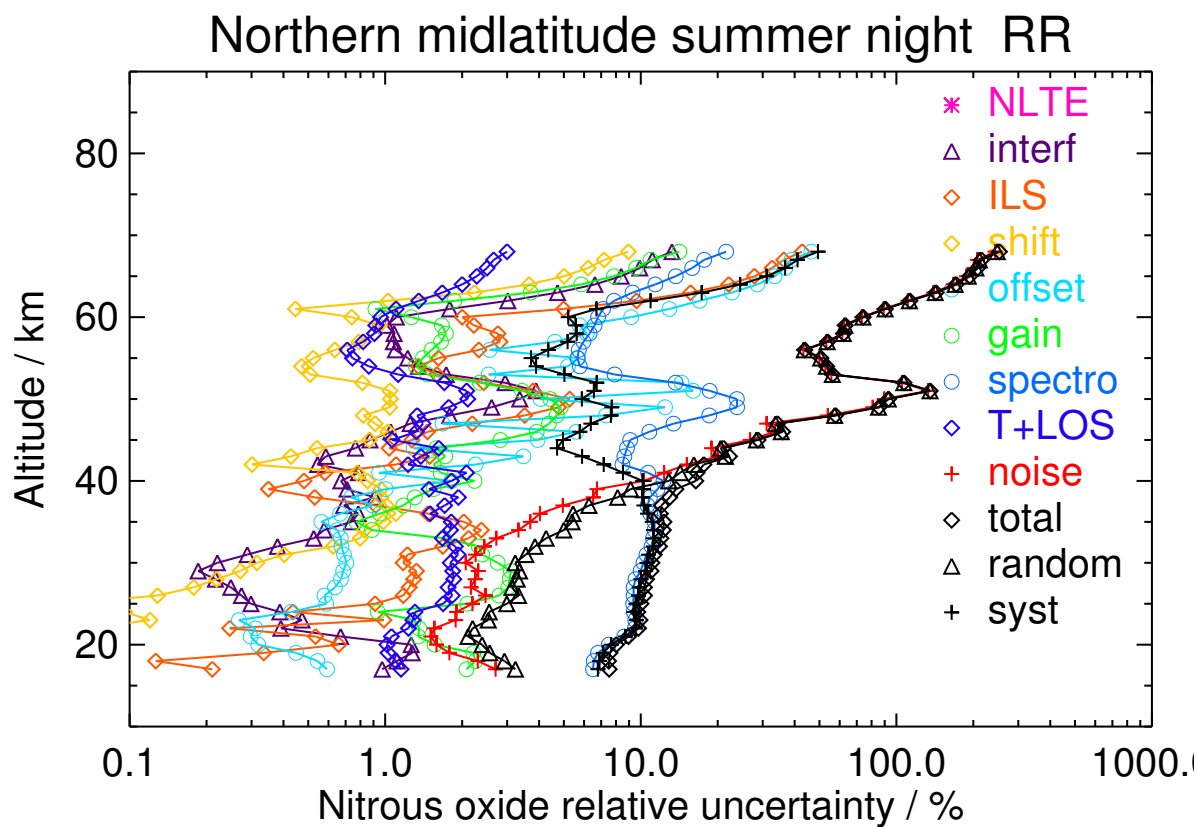

**Figure S218.** V8R\_N2O\_561 Northern midlatitude summer night



**Table S219.** Nitrous oxide error budget for Northern midlatitude autumn day. All uncertainties are  $1\sigma$ .

| altitude (km) | mean target (ppbv) | NLTE (ppbv) | interf (ppbv) | ILS (ppbv) | shift (ppbv) | offset (ppbv) | gain (ppbv) | spectro (ppbv) | T+LOS (ppbv) | noise (ppbv) | random (ppbv) | syst (ppbv) | total (ppbv) |
|---------------|--------------------|-------------|---------------|------------|--------------|---------------|-------------|----------------|--------------|--------------|---------------|-------------|--------------|
| 30            | 74.802             | <0.001      | 0.168         | 1.026      | 0.305        | 0.572         | 2.265       | 8.466          | 1.467        | 2.094        | 4.078         | 8.260       | 9.211        |
| 35            | 35.309             | <0.001      | 0.166         | 0.488      | 0.252        | 0.188         | 0.547       | 3.617          | 0.480        | 1.179        | 2.504         | 3.016       | 3.920        |
| 40            | 18.643             | <0.001      | 0.083         | 0.207      | 0.218        | 0.128         | 0.382       | 1.769          | 0.204        | 0.871        | 1.478         | 1.416       | 2.047        |
| 45            | 6.662              | <0.001      | 0.018         | 0.140      | 0.027        | 0.069         | 0.166       | 0.710          | 0.066        | 0.610        | 0.787         | 0.561       | 0.966        |
| 50            | 3.158              | <0.001      | 0.018         | 0.057      | 0.007        | 0.033         | 0.053       | 0.201          | 0.029        | 0.642        | 0.655         | 0.181       | 0.679        |
| 55            | 1.662              | <0.001      | 0.020         | 0.040      | 0.012        | 0.082         | 0.033       | 0.118          | 0.018        | 0.983        | 0.990         | 0.105       | 0.996        |
| 60            | 0.716              | <0.001      | 0.023         | 0.072      | 0.013        | 0.188         | 0.030       | 0.073          | 0.016        | 1.286        | 1.302         | 0.082       | 1.305        |
| 65            | -0.004             | <0.001      | 0.041         | 0.168      | 0.040        | 0.270         | 0.085       | 0.102          | 0.019        | 1.400        | 1.432         | 0.180       | 1.443        |
| 70            | -0.157             | <0.001      | 0.016         | 0.064      | 0.009        | 0.215         | 0.052       | 0.037          | 0.011        | 1.005        | 1.029         | 0.076       | 1.032        |

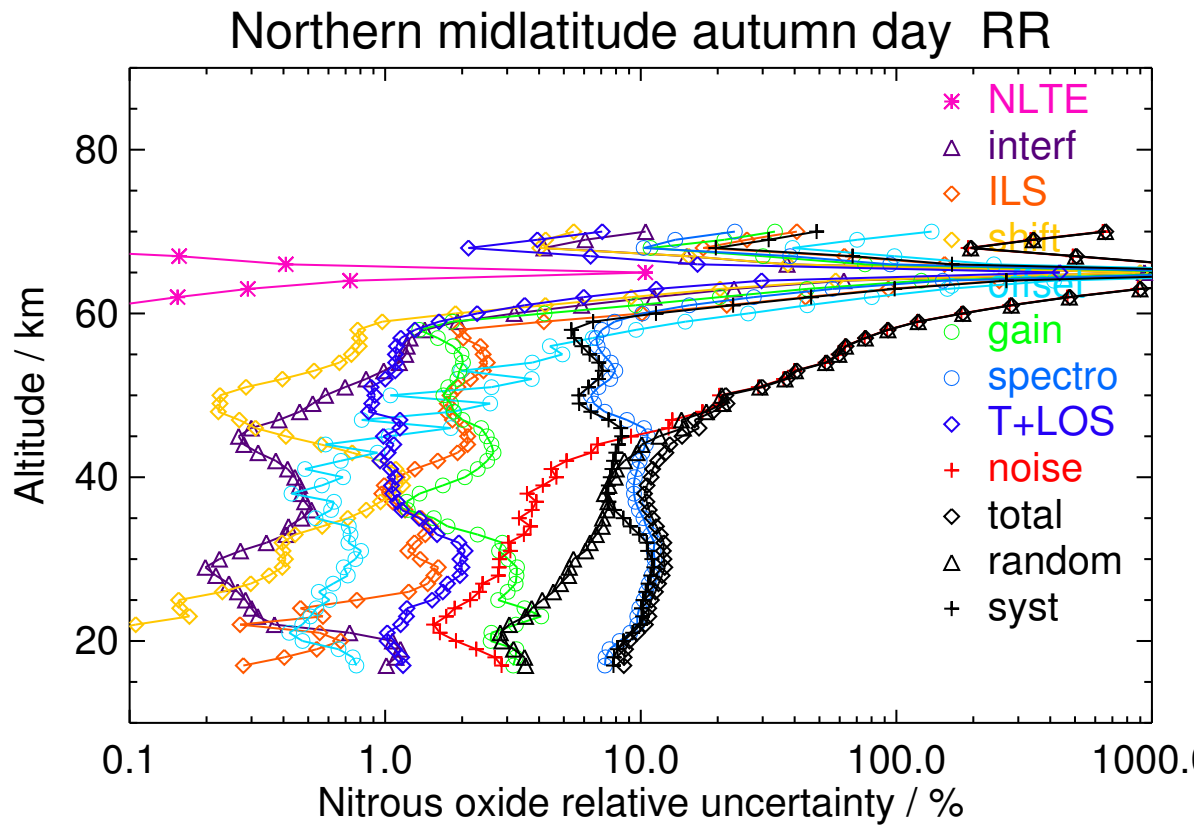

**Figure S219.** V8R\_N2O\_561 Northern midlatitude autumn day

**Table S220.** Nitrous oxide error budget for Northern midlatitude autumn night. All uncertainties are  $1\sigma$ .

| altitude (km) | mean target (ppbv) | NLTE (ppbv) | interf (ppbv) | ILS (ppbv) | shift (ppbv) | offset (ppbv) | gain (ppbv) | spectro (ppbv) | T+LOS (ppbv) | noise (ppbv) | random (ppbv) | syst (ppbv) | total (ppbv) |
|---------------|--------------------|-------------|---------------|------------|--------------|---------------|-------------|----------------|--------------|--------------|---------------|-------------|--------------|
| 30            | 83.306             | <0.001      | 0.206         | 1.057      | 0.300        | 0.537         | 2.063       | 9.145          | 1.467        | 2.135        | 4.272         | 8.825       | 9.805        |
| 35            | 40.049             | <0.001      | 0.173         | 0.680      | 0.246        | 0.212         | 0.657       | 4.406          | 0.579        | 1.290        | 2.471         | 4.042       | 4.737        |
| 40            | 16.893             | <0.001      | 0.073         | 0.241      | 0.155        | 0.131         | 0.405       | 1.736          | 0.198        | 0.900        | 1.495         | 1.378       | 2.033        |
| 45            | 6.631              | <0.001      | 0.017         | 0.144      | 0.018        | 0.060         | 0.156       | 0.708          | 0.066        | 0.613        | 0.780         | 0.567       | 0.964        |
| 50            | 3.360              | <0.001      | 0.019         | 0.057      | 0.007        | 0.044         | 0.056       | 0.215          | 0.030        | 0.673        | 0.689         | 0.184       | 0.713        |
| 55            | 1.662              | <0.001      | 0.020         | 0.040      | 0.011        | 0.086         | 0.036       | 0.137          | 0.020        | 1.015        | 1.022         | 0.125       | 1.029        |
| 60            | 1.068              | <0.001      | 0.020         | 0.052      | 0.008        | 0.201         | 0.029       | 0.067          | 0.016        | 1.317        | 1.334         | 0.068       | 1.336        |
| 65            | 0.443              | <0.001      | 0.031         | 0.120      | 0.025        | 0.275         | 0.086       | 0.072          | 0.017        | 1.412        | 1.442         | 0.135       | 1.449        |
| 70            | -0.356             | <0.001      | 0.009         | 0.019      | 0.006        | 0.212         | 0.009       | 0.003          | 0.004        | 0.989        | 1.011         | 0.021       | 1.012        |

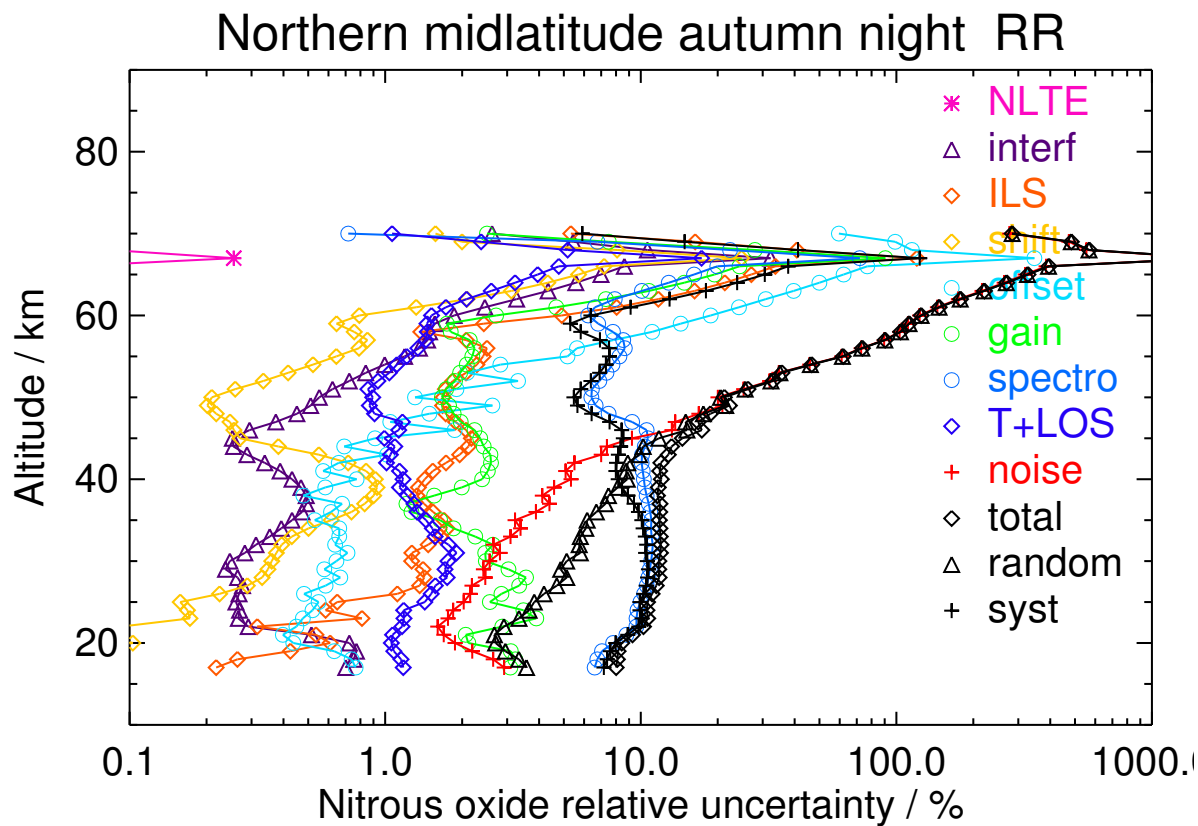

**Figure S220.** V8R\_N2O\_561 Northern midlatitude autumn night

**Table S221.** Nitrous oxide error budget for Tropics day. All uncertainties are  $1\sigma$ .

| altitude<br>(km) | mean target<br>(ppbv) | NLTE<br>(ppbv) | interf<br>(ppbv) | ILS<br>(ppbv) | shift<br>(ppbv) | offset<br>(ppbv) | gain<br>(ppbv) | spectro<br>(ppbv) | T+LOS<br>(ppbv) | noise<br>(ppbv) | random<br>(ppbv) | syst<br>(ppbv) | total<br>(ppbv) |
|------------------|-----------------------|----------------|------------------|---------------|-----------------|------------------|----------------|-------------------|-----------------|-----------------|------------------|----------------|-----------------|
| 30               | 209.724               | <0.001         | 0.714            | 1.588         | 0.508           | 0.842            | 1.075          | 17.896            | 2.646           | 3.101           | 4.833            | 17.851         | 18.494          |
| 35               | 112.049               | <0.001         | 0.458            | 0.705         | 0.550           | 0.457            | 0.523          | 9.851             | 1.259           | 1.771           | 2.821            | 9.763          | 10.162          |
| 40               | 29.770                | <0.001         | 0.153            | 0.077         | 0.396           | 0.140            | 0.552          | 2.719             | 0.356           | 0.923           | 1.352            | 2.656          | 2.981           |
| 45               | 7.649                 | <0.001         | 0.018            | 0.115         | 0.035           | 0.083            | 0.168          | 0.616             | 0.068           | 0.536           | 0.645            | 0.553          | 0.849           |
| 50               | 2.716                 | <0.001         | 0.017            | 0.065         | 0.008           | 0.025            | 0.051          | 0.232             | 0.033           | 0.511           | 0.524            | 0.224          | 0.569           |
| 55               | 0.748                 | <0.001         | 0.019            | 0.043         | 0.015           | 0.067            | 0.016          | 0.085             | 0.013           | 0.801           | 0.807            | 0.070          | 0.810           |
| 60               | 0.385                 | <0.001         | 0.025            | 0.100         | 0.019           | 0.152            | 0.034          | 0.075             | 0.012           | 1.149           | 1.161            | 0.111          | 1.166           |
| 65               | -0.030                | <0.001         | 0.079            | 0.321         | 0.083           | 0.253            | 0.124          | 0.213             | 0.024           | 1.363           | 1.394            | 0.397          | 1.449           |

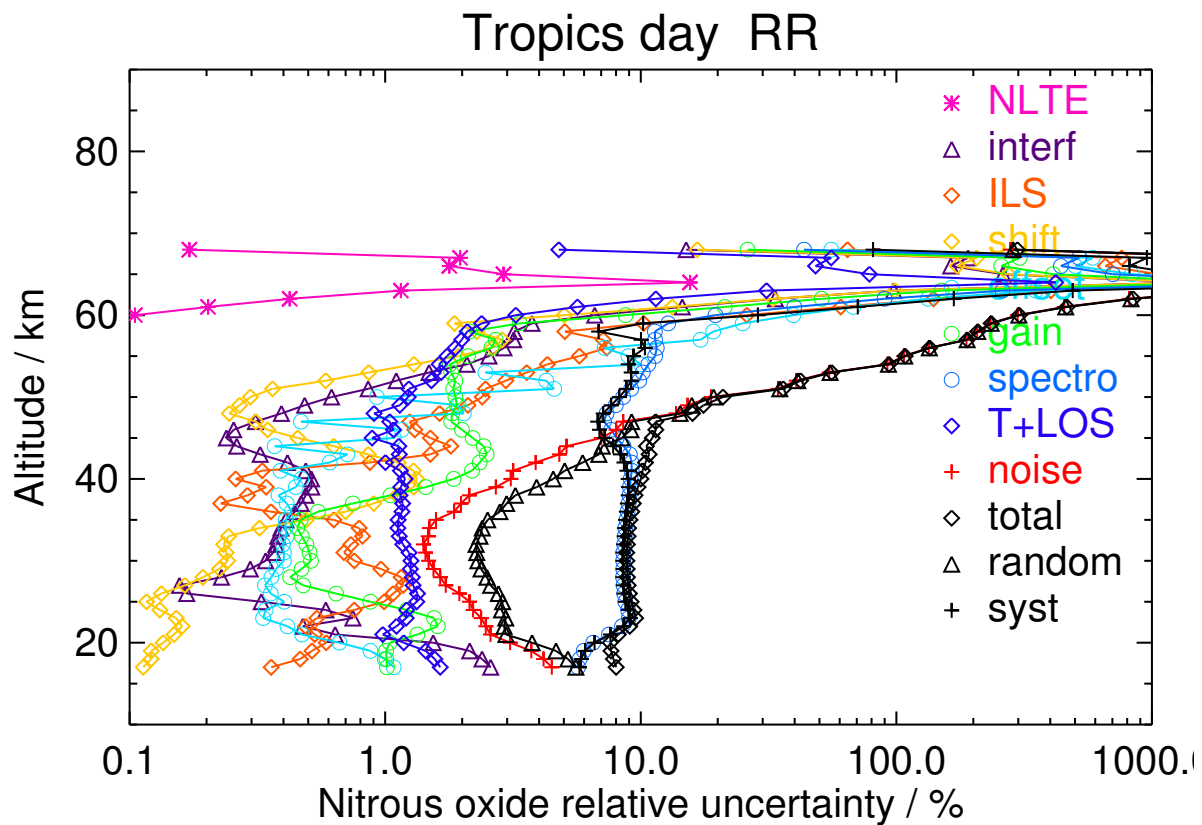**Figure S221.** V8R\_N2O\_561 Tropics day

**Table S222.** Nitrous oxide error budget for Tropics night. All uncertainties are  $1\sigma$ .

| altitude (km) | mean target (ppbv) | NLTE (ppbv) | interf (ppbv) | ILS (ppbv) | shift (ppbv) | offset (ppbv) | gain (ppbv) | spectro (ppbv) | T+LOS (ppbv) | noise (ppbv) | random (ppbv) | syst (ppbv) | total (ppbv) |
|---------------|--------------------|-------------|---------------|------------|--------------|---------------|-------------|----------------|--------------|--------------|---------------|-------------|--------------|
| 30            | 206.827            | <0.001      | 0.795         | 1.548      | 0.513        | 0.777         | 1.041       | 17.736         | 2.558        | 3.009        | 4.764         | 17.676      | 18.307       |
| 35            | 109.988            | <0.001      | 0.446         | 0.725      | 0.518        | 0.430         | 0.575       | 9.588          | 1.212        | 1.739        | 2.767         | 9.501       | 9.896        |
| 40            | 31.938             | <0.001      | 0.159         | 0.110      | 0.443        | 0.154         | 0.589       | 2.819          | 0.368        | 0.972        | 1.399         | 2.771       | 3.104        |
| 45            | 7.481              | <0.001      | 0.018         | 0.125      | 0.035        | 0.062         | 0.167       | 0.620          | 0.074        | 0.482        | 0.565         | 0.594       | 0.820        |
| 50            | 2.527              | <0.001      | 0.017         | 0.062      | 0.007        | 0.025         | 0.046       | 0.211          | 0.034        | 0.494        | 0.506         | 0.202       | 0.545        |
| 55            | 0.583              | <0.001      | 0.019         | 0.036      | 0.013        | 0.084         | 0.015       | 0.067          | 0.010        | 0.844        | 0.851         | 0.058       | 0.852        |
| 60            | 0.634              | <0.001      | 0.023         | 0.085      | 0.017        | 0.155         | 0.026       | 0.071          | 0.012        | 1.131        | 1.143         | 0.096       | 1.147        |
| 65            | 0.297              | <0.001      | 0.077         | 0.310      | 0.083        | 0.247         | 0.121       | 0.212          | 0.024        | 1.355        | 1.385         | 0.387       | 1.438        |

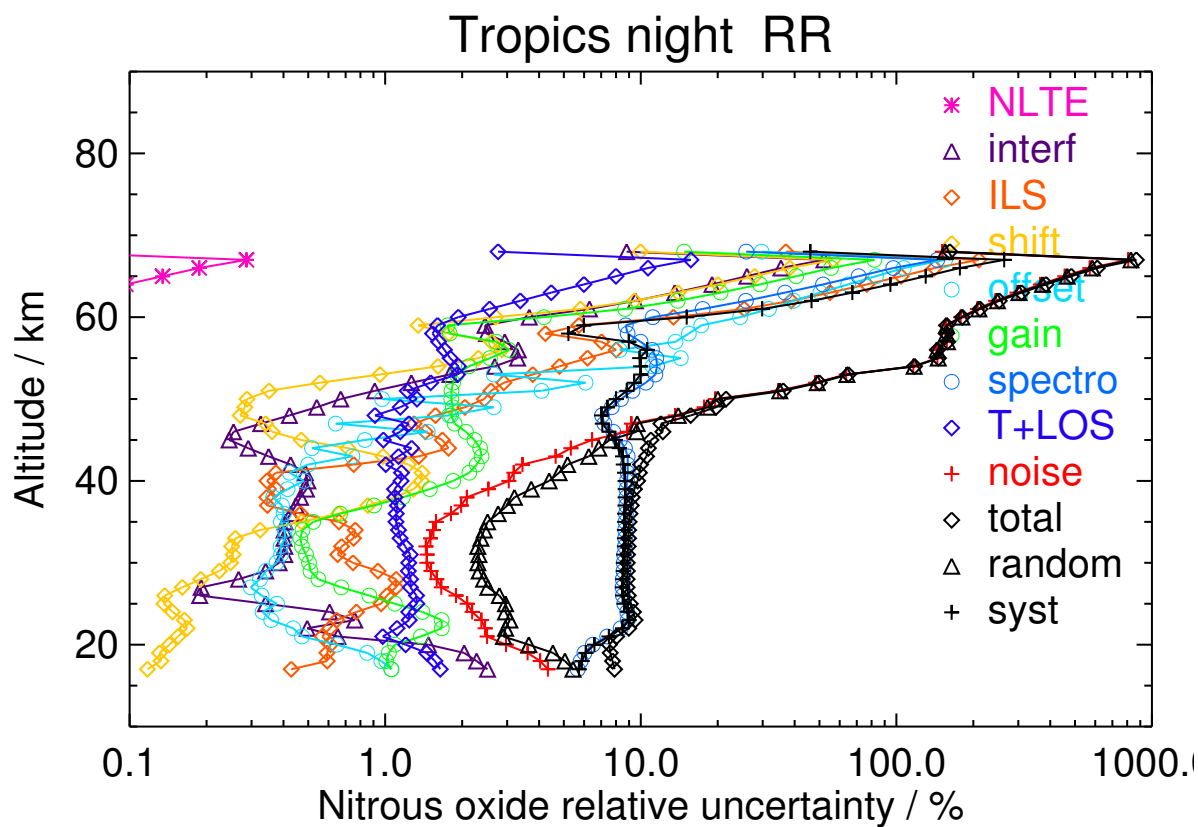

**Figure S222.** V8R\_N2O\_561 Tropics night

**Table S223.** Nitrous oxide error budget for Southern midlatitude winter day. All uncertainties are  $1\sigma$ .

| altitude (km) | mean target (ppbv) | NLTE (ppbv) | interf (ppbv) | ILS (ppbv) | shift (ppbv) | offset (ppbv) | gain (ppbv) | spectro (ppbv) | T+LOS (ppbv) | noise (ppbv) | random (ppbv) | syst (ppbv) | total (ppbv) |
|---------------|--------------------|-------------|---------------|------------|--------------|---------------|-------------|----------------|--------------|--------------|---------------|-------------|--------------|
| 30            | 123.947            | <0.001      | 0.300         | 2.113      | 0.489        | 0.927         | 6.352       | 13.369         | 2.133        | 2.438        | 8.620         | 12.685      | 15.337       |
| 35            | 38.718             | <0.001      | 0.146         | 1.359      | 0.235        | 0.329         | 1.845       | 6.365          | 0.822        | 1.334        | 3.834         | 5.805       | 6.957        |
| 40            | 3.303              | <0.001      | 0.017         | 0.142      | 0.013        | 0.090         | 0.130       | 0.766          | 0.062        | 0.565        | 0.897         | 0.388       | 0.977        |
| 45            | 2.434              | <0.001      | 0.012         | 0.028      | 0.006        | 0.020         | 0.046       | 0.146          | 0.022        | 0.440        | 0.457         | 0.101       | 0.468        |
| 50            | 2.132              | <0.001      | 0.017         | 0.041      | 0.007        | 0.077         | 0.042       | 0.173          | 0.018        | 0.693        | 0.710         | 0.130       | 0.721        |
| 55            | 0.914              | <0.001      | 0.017         | 0.031      | 0.010        | 0.076         | 0.027       | 0.086          | 0.014        | 1.010        | 1.016         | 0.071       | 1.018        |
| 60            | 0.979              | <0.001      | 0.025         | 0.084      | 0.012        | 0.205         | 0.060       | 0.063          | 0.016        | 1.330        | 1.349         | 0.072       | 1.351        |
| 65            | 0.799              | <0.001      | 0.047         | 0.157      | 0.028        | 0.273         | 0.164       | 0.085          | 0.024        | 1.398        | 1.436         | 0.172       | 1.446        |

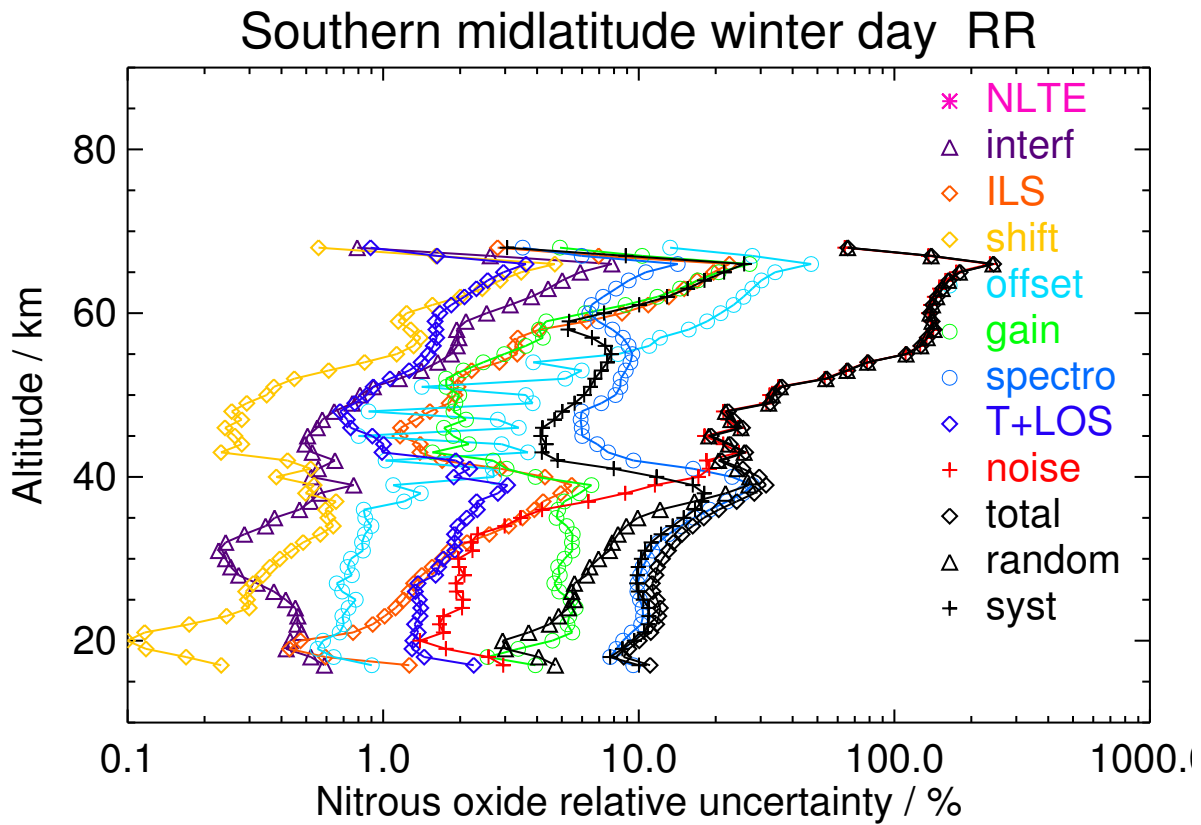

**Figure S223.** V8R\_N2O\_561 Southern midlatitude winter day

**Table S224.** Nitrous oxide error budget for Southern midlatitude winter night. All uncertainties are  $1\sigma$ .

| altitude (km) | mean target (ppbv) | NLTE (ppbv) | interf (ppbv) | ILS (ppbv) | shift (ppbv) | offset (ppbv) | gain (ppbv) | spectro (ppbv) | T+LOS (ppbv) | noise (ppbv) | random (ppbv) | syst (ppbv) | total (ppbv) |
|---------------|--------------------|-------------|---------------|------------|--------------|---------------|-------------|----------------|--------------|--------------|---------------|-------------|--------------|
| 30            | 84.126             | <0.001      | 0.241         | 1.190      | 0.299        | 0.604         | 3.277       | 9.835          | 1.594        | 2.453        | 6.387         | 8.784       | 10.861       |
| 35            | 29.462             | <0.001      | 0.126         | 0.917      | 0.174        | 0.253         | 0.914       | 4.591          | 0.640        | 1.395        | 3.019         | 4.013       | 5.022        |
| 40            | 2.383              | <0.001      | 0.014         | 0.122      | 0.012        | 0.095         | 0.084       | 0.575          | 0.061        | 0.610        | 0.782         | 0.355       | 0.859        |
| 45            | 1.624              | <0.001      | 0.012         | 0.025      | 0.005        | 0.023         | 0.029       | 0.115          | 0.017        | 0.467        | 0.479         | 0.069       | 0.484        |
| 50            | 1.391              | <0.001      | 0.018         | 0.029      | 0.006        | 0.070         | 0.030       | 0.112          | 0.013        | 0.668        | 0.678         | 0.073       | 0.682        |
| 55            | 0.696              | <0.001      | 0.018         | 0.027      | 0.009        | 0.080         | 0.024       | 0.077          | 0.012        | 0.999        | 1.004         | 0.053       | 1.006        |
| 60            | 0.359              | <0.001      | 0.019         | 0.065      | 0.010        | 0.198         | 0.036       | 0.052          | 0.013        | 1.296        | 1.314         | 0.051       | 1.315        |
| 65            | 0.128              | <0.001      | 0.030         | 0.128      | 0.017        | 0.268         | 0.088       | 0.053          | 0.015        | 1.387        | 1.418         | 0.110       | 1.422        |

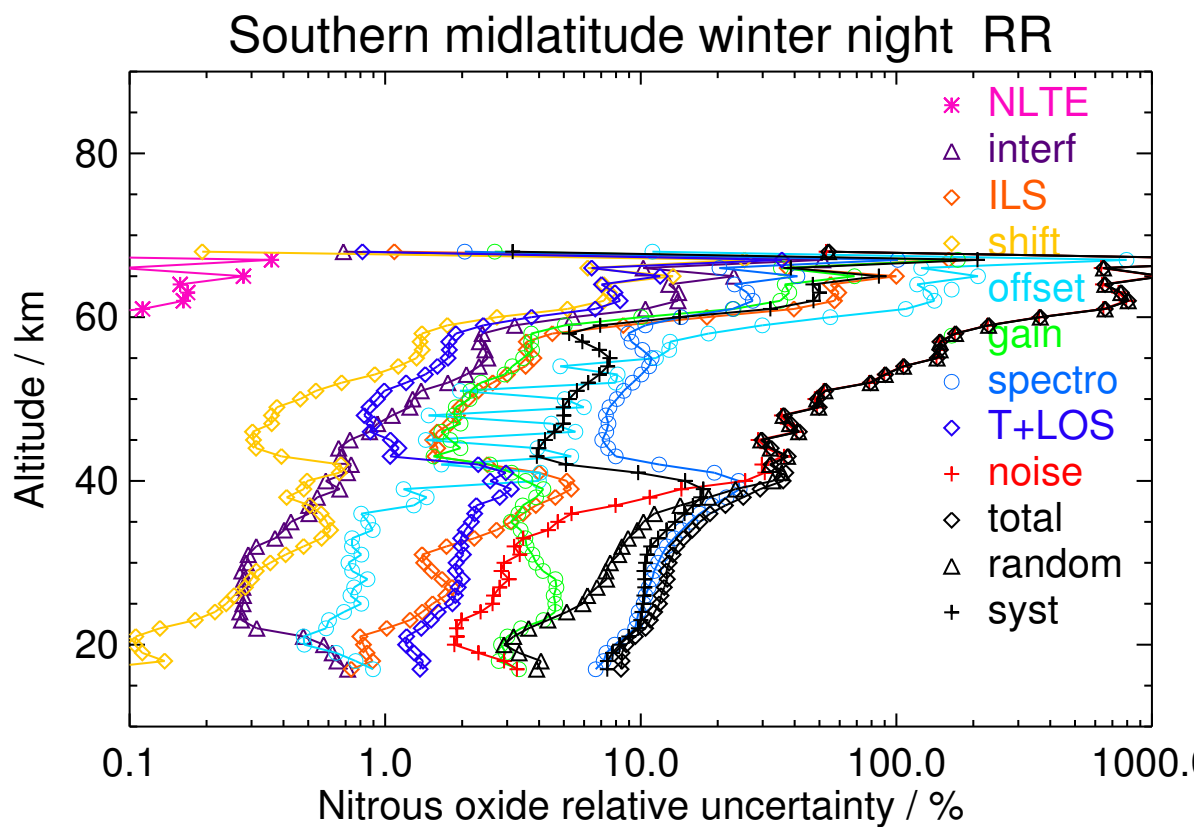

**Figure S224.** V8R\_N2O\_561 Southern midlatitude winter night

**Table S225.** Nitrous oxide error budget for Southern midlatitude spring day. All uncertainties are  $1\sigma$ .

| altitude (km) | mean target (ppbv) | NLTE (ppbv) | interf (ppbv) | ILS (ppbv) | shift (ppbv) | offset (ppbv) | gain (ppbv) | spectro (ppbv) | T+LOS (ppbv) | noise (ppbv) | random (ppbv) | syst (ppbv) | total (ppbv) |
|---------------|--------------------|-------------|---------------|------------|--------------|---------------|-------------|----------------|--------------|--------------|---------------|-------------|--------------|
| 30            | 127.069            | <0.001      | 0.334         | 1.485      | 0.419        | 0.817         | 4.483       | 13.024         | 1.939        | 2.100        | 6.384         | 12.661      | 14.179       |
| 35            | 35.487             | <0.001      | 0.163         | 1.066      | 0.223        | 0.230         | 0.641       | 5.119          | 0.689        | 1.141        | 2.581         | 4.796       | 5.446        |
| 40            | 7.673              | <0.001      | 0.029         | 0.074      | 0.026        | 0.091         | 0.090       | 0.696          | 0.096        | 0.584        | 0.678         | 0.631       | 0.926        |
| 45            | 2.575              | <0.001      | 0.012         | 0.044      | 0.004        | 0.017         | 0.039       | 0.200          | 0.032        | 0.408        | 0.422         | 0.181       | 0.460        |
| 50            | 2.158              | <0.001      | 0.017         | 0.034      | 0.007        | 0.079         | 0.038       | 0.130          | 0.015        | 0.634        | 0.644         | 0.115       | 0.654        |
| 55            | 0.831              | <0.001      | 0.016         | 0.035      | 0.012        | 0.073         | 0.041       | 0.071          | 0.012        | 0.906        | 0.912         | 0.067       | 0.914        |
| 60            | 1.120              | <0.001      | 0.020         | 0.056      | 0.011        | 0.157         | 0.065       | 0.067          | 0.015        | 1.158        | 1.173         | 0.064       | 1.174        |
| 65            | 0.488              | <0.001      | 0.048         | 0.169      | 0.033        | 0.256         | 0.227       | 0.095          | 0.031        | 1.368        | 1.404         | 0.241       | 1.425        |

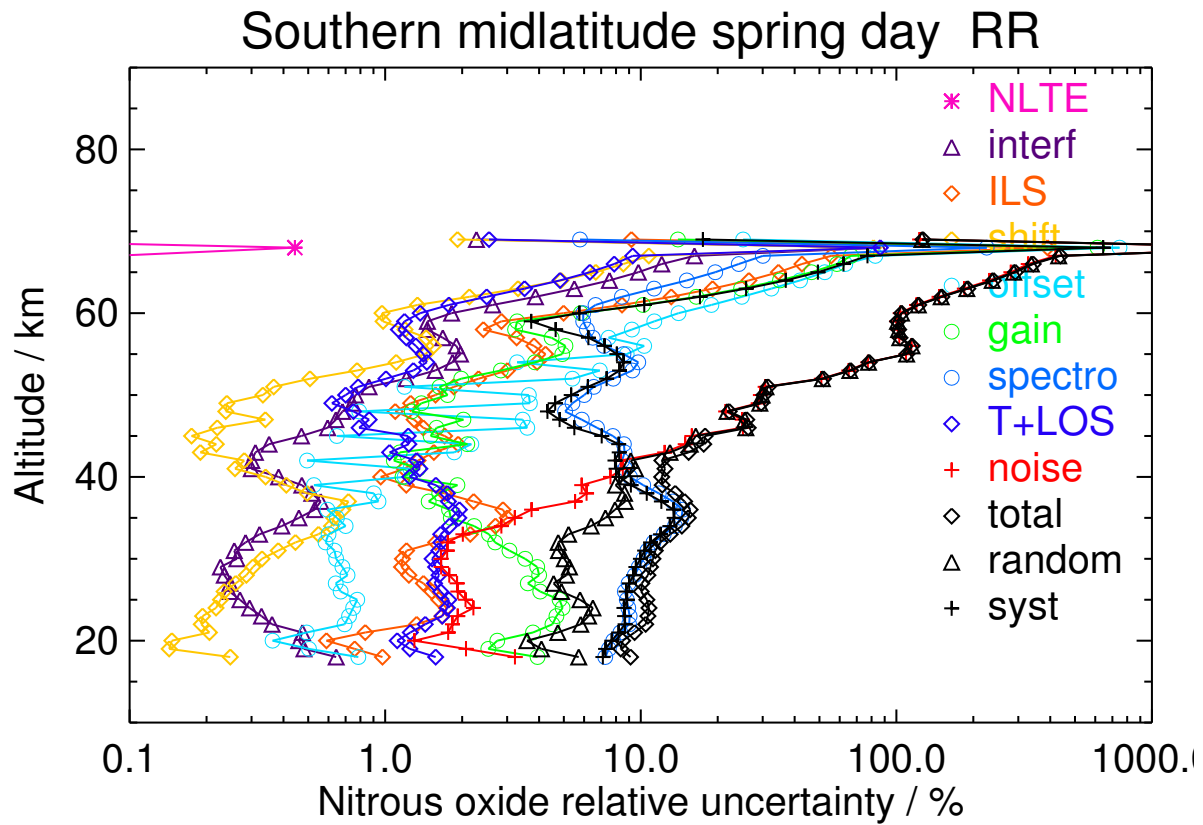

**Figure S225.** V8R\_N2O\_561 Southern midlatitude spring day

**Table S226.** Nitrous oxide error budget for Southern midlatitude spring night. All uncertainties are  $1\sigma$ .

| altitude (km) | mean target (ppbv) | NLTE (ppbv) | interf (ppbv) | ILS (ppbv) | shift (ppbv) | offset (ppbv) | gain (ppbv) | spectro (ppbv) | T+LOS (ppbv) | noise (ppbv) | random (ppbv) | syst (ppbv) | total (ppbv) |
|---------------|--------------------|-------------|---------------|------------|--------------|---------------|-------------|----------------|--------------|--------------|---------------|-------------|--------------|
| 30            | 127.074            | <0.001      | 0.276         | 1.876      | 0.450        | 0.876         | 5.139       | 11.562         | 1.929        | 2.264        | 6.164         | 11.641      | 13.172       |
| 35            | 43.191             | <0.001      | 0.164         | 1.141      | 0.271        | 0.289         | 1.366       | 5.644          | 0.762        | 1.158        | 2.950         | 5.331       | 6.093        |
| 40            | 8.228              | <0.001      | 0.030         | 0.069      | 0.029        | 0.103         | 0.098       | 0.764          | 0.111        | 0.626        | 0.736         | 0.688       | 1.007        |
| 45            | 2.827              | <0.001      | 0.012         | 0.047      | 0.006        | 0.029         | 0.053       | 0.211          | 0.029        | 0.419        | 0.433         | 0.200       | 0.477        |
| 50            | 1.857              | <0.001      | 0.017         | 0.034      | 0.007        | 0.057         | 0.036       | 0.117          | 0.014        | 0.573        | 0.581         | 0.105       | 0.591        |
| 55            | 1.033              | <0.001      | 0.018         | 0.039      | 0.011        | 0.087         | 0.040       | 0.092          | 0.014        | 0.935        | 0.942         | 0.083       | 0.945        |
| 60            | 0.232              | <0.001      | 0.019         | 0.058      | 0.007        | 0.161         | 0.053       | 0.053          | 0.013        | 1.165        | 1.178         | 0.067       | 1.180        |
| 65            | -0.227             | <0.001      | 0.040         | 0.172      | 0.031        | 0.258         | 0.221       | 0.108          | 0.026        | 1.368        | 1.404         | 0.245       | 1.425        |
| 70            | 0.479              | <0.001      | 0.018         | 0.069      | 0.014        | 0.208         | 0.077       | 0.042          | 0.012        | 0.998        | 1.021         | 0.106       | 1.026        |

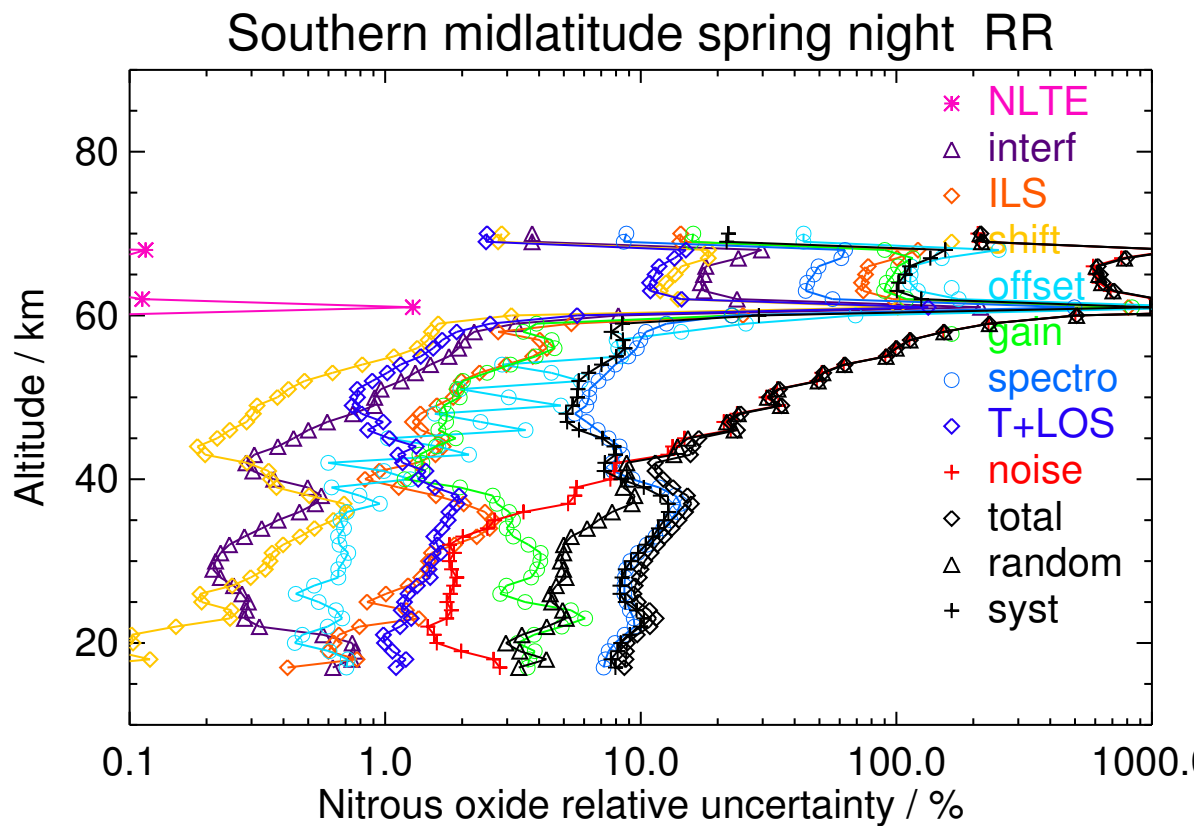

**Figure S226.** V8R\_N2O\_561 Southern midlatitude spring night



**Table S227.** Nitrous oxide error budget for Southern midlatitude summer day. All uncertainties are  $1\sigma$ .

| altitude (km) | mean target (ppbv) | NLTE (ppbv) | interf (ppbv) | ILS (ppbv) | shift (ppbv) | offset (ppbv) | gain (ppbv) | spectro (ppbv) | T+LOS (ppbv) | noise (ppbv) | random (ppbv) | syst (ppbv) | total (ppbv) |
|---------------|--------------------|-------------|---------------|------------|--------------|---------------|-------------|----------------|--------------|--------------|---------------|-------------|--------------|
| 30            | 76.370             | <0.001      | 0.228         | 0.995      | 0.274        | 0.563         | 2.026       | 7.829          | 1.422        | 1.753        | 2.864         | 7.983       | 8.481        |
| 35            | 30.334             | <0.001      | 0.197         | 0.483      | 0.407        | 0.152         | 0.248       | 2.757          | 0.389        | 0.929        | 1.220         | 2.765       | 3.022        |
| 40            | 8.012              | <0.001      | 0.045         | 0.032      | 0.087        | 0.067         | 0.181       | 0.699          | 0.102        | 0.448        | 0.556         | 0.662       | 0.864        |
| 45            | 2.960              | <0.001      | 0.015         | 0.039      | 0.018        | 0.071         | 0.080       | 0.228          | 0.026        | 0.422        | 0.463         | 0.174       | 0.494        |
| 50            | 1.354              | <0.001      | 0.013         | 0.032      | 0.005        | 0.033         | 0.037       | 0.125          | 0.014        | 0.455        | 0.470         | 0.073       | 0.476        |
| 55            | 1.532              | <0.001      | 0.014         | 0.044      | 0.012        | 0.080         | 0.034       | 0.134          | 0.016        | 0.781        | 0.795         | 0.078       | 0.798        |
| 60            | 1.384              | <0.001      | 0.023         | 0.069      | 0.011        | 0.142         | 0.012       | 0.104          | 0.018        | 1.073        | 1.087         | 0.086       | 1.090        |
| 65            | 0.797              | <0.001      | 0.077         | 0.241      | 0.053        | 0.249         | 0.077       | 0.136          | 0.018        | 1.333        | 1.363         | 0.271       | 1.389        |
| 70            | 0.691              | <0.001      | 0.061         | 0.187      | 0.046        | 0.190         | 0.052       | 0.116          | 0.009        | 0.953        | 0.975         | 0.226       | 1.000        |

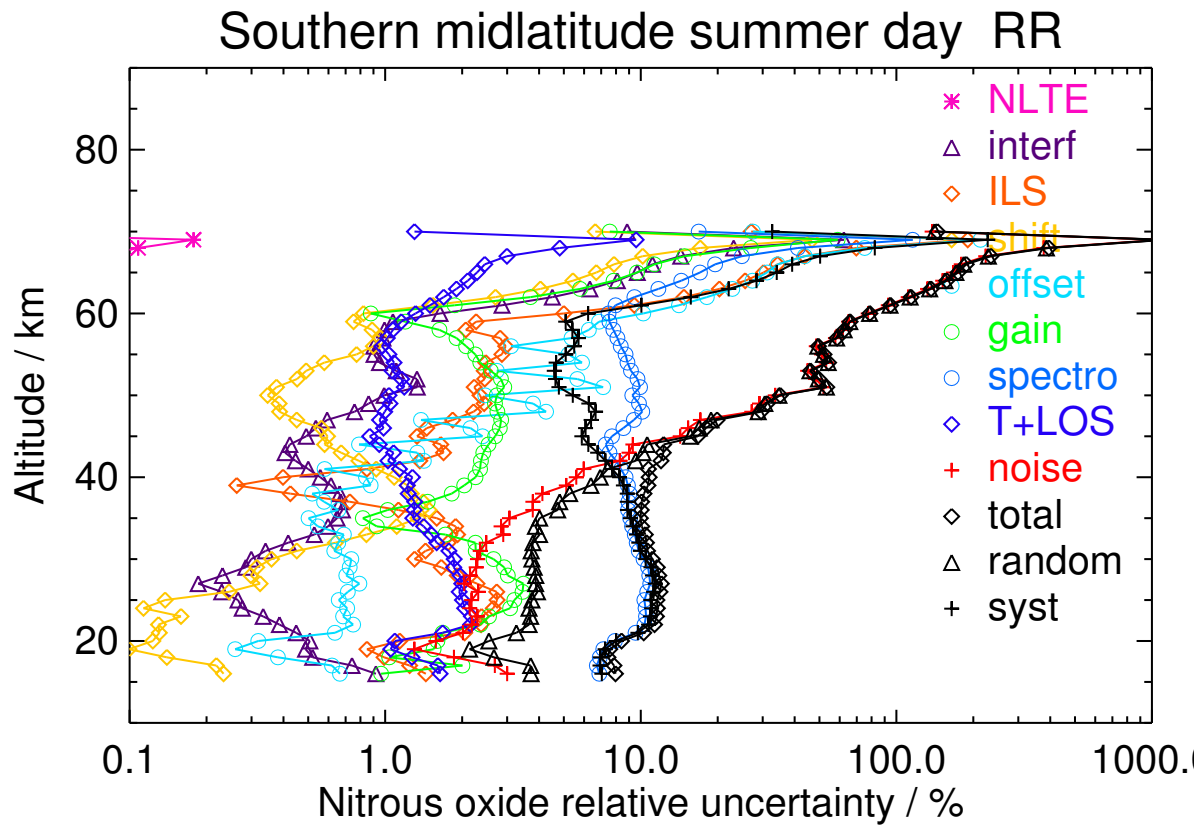

**Figure S227.** V8R\_N2O\_561 Southern midlatitude summer day

**Table S228.** Nitrous oxide error budget for Southern midlatitude summer night. All uncertainties are  $1\sigma$ .

| altitude (km) | mean target (ppbv) | NLTE (ppbv) | interf (ppbv) | ILS (ppbv) | shift (ppbv) | offset (ppbv) | gain (ppbv) | spectro (ppbv) | T+LOS (ppbv) | noise (ppbv) | random (ppbv) | syst (ppbv) | total (ppbv) |
|---------------|--------------------|-------------|---------------|------------|--------------|---------------|-------------|----------------|--------------|--------------|---------------|-------------|--------------|
| 30            | 72.836             | <0.001      | 0.197         | 1.256      | 0.276        | 0.614         | 2.715       | 6.981          | 1.390        | 1.718        | 2.894         | 7.395       | 7.941        |
| 35            | 31.008             | <0.001      | 0.183         | 0.527      | 0.402        | 0.163         | 0.308       | 2.657          | 0.417        | 0.902        | 1.216         | 2.676       | 2.939        |
| 40            | 7.078              | <0.001      | 0.038         | 0.025      | 0.076        | 0.071         | 0.137       | 0.653          | 0.099        | 0.406        | 0.506         | 0.614       | 0.796        |
| 45            | 2.033              | <0.001      | 0.012         | 0.039      | 0.013        | 0.052         | 0.059       | 0.191          | 0.022        | 0.346        | 0.381         | 0.140       | 0.406        |
| 50            | 0.991              | <0.001      | 0.013         | 0.028      | 0.005        | 0.027         | 0.037       | 0.106          | 0.011        | 0.404        | 0.419         | 0.048       | 0.421        |
| 55            | 1.016              | <0.001      | 0.014         | 0.030      | 0.009        | 0.094         | 0.027       | 0.116          | 0.013        | 0.790        | 0.803         | 0.050       | 0.805        |
| 60            | 0.840              | <0.001      | 0.018         | 0.048      | 0.009        | 0.122         | 0.013       | 0.084          | 0.014        | 0.981        | 0.992         | 0.056       | 0.994        |
| 65            | 0.064              | <0.001      | 0.075         | 0.236      | 0.055        | 0.235         | 0.088       | 0.138          | 0.016        | 1.291        | 1.318         | 0.275       | 1.346        |
| 70            | 0.313              | <0.001      | 0.072         | 0.228      | 0.056        | 0.191         | 0.067       | 0.140          | 0.011        | 0.954        | 0.978         | 0.273       | 1.016        |

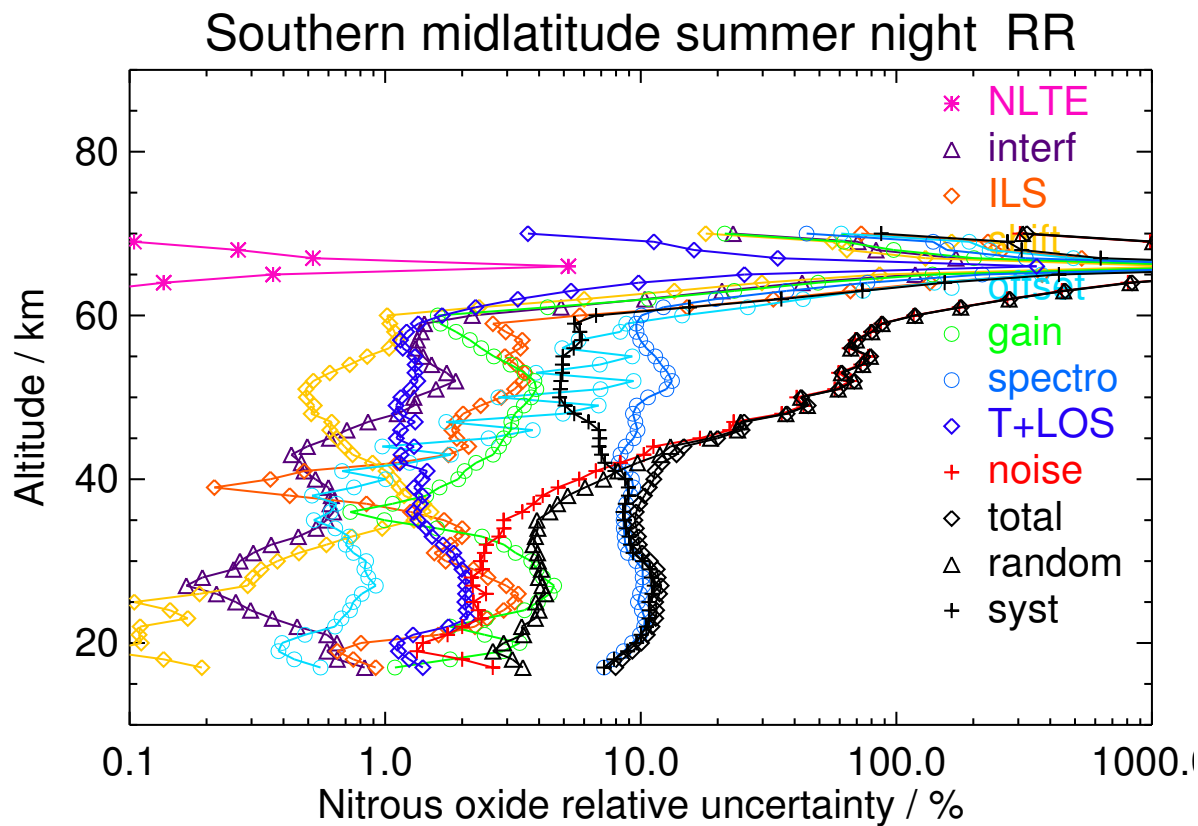

**Figure S228.** V8R\_N2O\_561 Southern midlatitude summer night

**Table S229.** Nitrous oxide error budget for Southern midlatitude autumn day. All uncertainties are  $1\sigma$ .

| altitude (km) | mean target (ppbv) | NLTE (ppbv) | interf (ppbv) | ILS (ppbv) | shift (ppbv) | offset (ppbv) | gain (ppbv) | spectro (ppbv) | T+LOS (ppbv) | noise (ppbv) | random (ppbv) | syst (ppbv) | total (ppbv) |
|---------------|--------------------|-------------|---------------|------------|--------------|---------------|-------------|----------------|--------------|--------------|---------------|-------------|--------------|
| 30            | 73.471             | <0.001      | 0.205         | 1.855      | 0.355        | 0.544         | 2.233       | 9.100          | 1.495        | 1.845        | 3.819         | 9.097       | 9.867        |
| 35            | 26.978             | <0.001      | 0.160         | 0.624      | 0.231        | 0.207         | 0.580       | 3.089          | 0.436        | 1.167        | 2.192         | 2.671       | 3.455        |
| 40            | 14.884             | <0.001      | 0.068         | 0.214      | 0.134        | 0.129         | 0.251       | 1.341          | 0.169        | 0.868        | 1.277         | 1.047       | 1.651        |
| 45            | 7.896              | <0.001      | 0.019         | 0.145      | 0.018        | 0.036         | 0.170       | 0.638          | 0.070        | 0.572        | 0.692         | 0.558       | 0.890        |
| 50            | 3.693              | <0.001      | 0.018         | 0.072      | 0.009        | 0.079         | 0.072       | 0.271          | 0.037        | 0.727        | 0.749         | 0.243       | 0.788        |
| 55            | 2.134              | <0.001      | 0.017         | 0.041      | 0.012        | 0.083         | 0.044       | 0.153          | 0.023        | 1.031        | 1.038         | 0.146       | 1.048        |
| 60            | 1.255              | <0.001      | 0.028         | 0.086      | 0.013        | 0.216         | 0.050       | 0.083          | 0.020        | 1.367        | 1.387         | 0.107       | 1.391        |
| 65            | 0.659              | <0.001      | 0.041         | 0.145      | 0.029        | 0.285         | 0.098       | 0.081          | 0.021        | 1.428        | 1.460         | 0.171       | 1.470        |
| 70            | 0.437              | <0.001      | 0.015         | 0.027      | 0.005        | 0.245         | 0.065       | 0.026          | 0.013        | 1.067        | 1.095         | 0.074       | 1.097        |

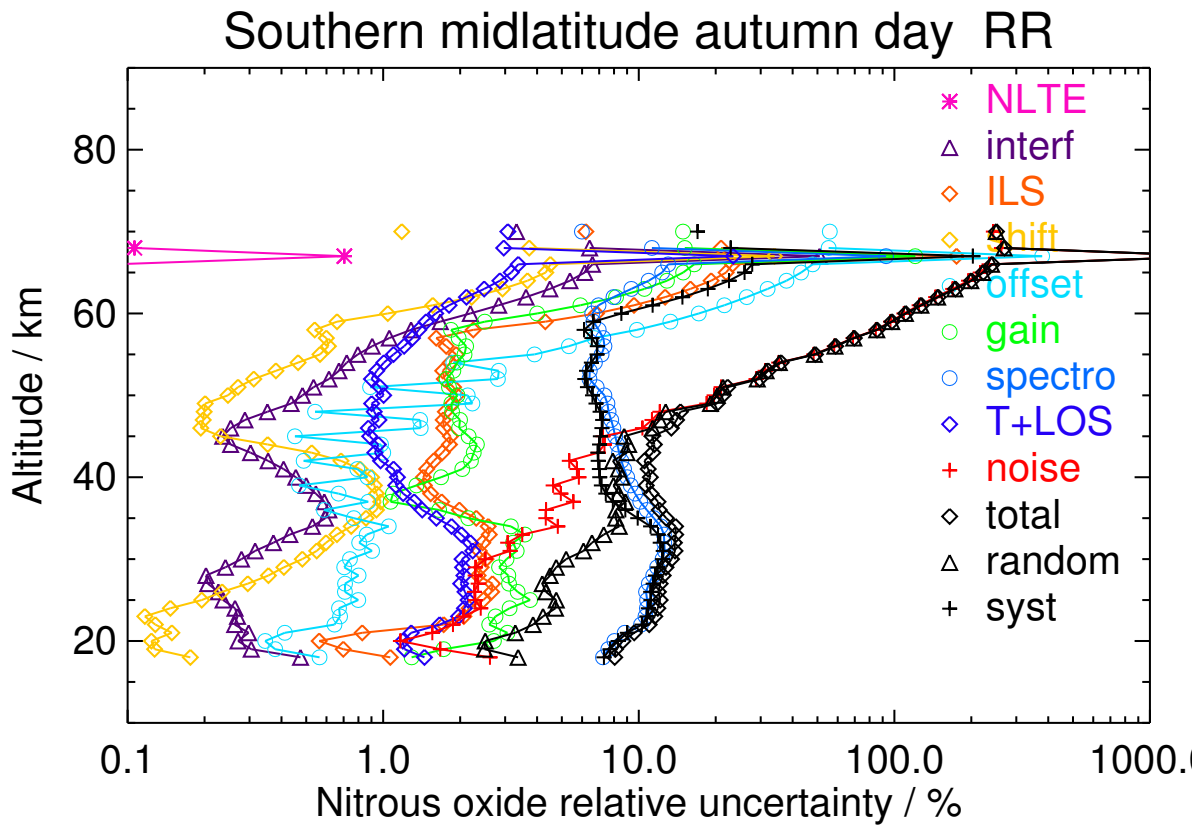

**Figure S229.** V8R\_N2O\_561 Southern midlatitude autumn day

**Table S230.** Nitrous oxide error budget for Southern midlatitude autumn night. All uncertainties are  $1\sigma$ .

| altitude (km) | mean target (ppbv) | NLTE (ppbv) | interf (ppbv) | ILS (ppbv) | shift (ppbv) | offset (ppbv) | gain (ppbv) | spectro (ppbv) | T+LOS (ppbv) | noise (ppbv) | random (ppbv) | syst (ppbv) | total (ppbv) |
|---------------|--------------------|-------------|---------------|------------|--------------|---------------|-------------|----------------|--------------|--------------|---------------|-------------|--------------|
| 30            | 65.363             | <0.001      | 0.167         | 1.529      | 0.307        | 0.564         | 2.510       | 8.005          | 1.491        | 1.847        | 3.526         | 8.146       | 8.877        |
| 35            | 22.874             | <0.001      | 0.130         | 0.520      | 0.210        | 0.165         | 0.380       | 2.567          | 0.384        | 1.069        | 1.754         | 2.304       | 2.896        |
| 40            | 10.054             | <0.001      | 0.049         | 0.116      | 0.103        | 0.119         | 0.170       | 0.780          | 0.117        | 0.757        | 0.917         | 0.652       | 1.125        |
| 45            | 6.542              | <0.001      | 0.018         | 0.107      | 0.021        | 0.029         | 0.122       | 0.467          | 0.053        | 0.521        | 0.608         | 0.387       | 0.721        |
| 50            | 3.619              | <0.001      | 0.017         | 0.067      | 0.008        | 0.077         | 0.067       | 0.255          | 0.034        | 0.708        | 0.732         | 0.219       | 0.764        |
| 55            | 2.158              | <0.001      | 0.017         | 0.040      | 0.011        | 0.083         | 0.037       | 0.146          | 0.022        | 1.035        | 1.041         | 0.136       | 1.050        |
| 60            | 0.866              | <0.001      | 0.029         | 0.085      | 0.014        | 0.209         | 0.067       | 0.081          | 0.020        | 1.352        | 1.371         | 0.109       | 1.375        |
| 65            | 0.294              | <0.001      | 0.042         | 0.134      | 0.027        | 0.285         | 0.116       | 0.073          | 0.023        | 1.437        | 1.469         | 0.169       | 1.478        |
| 70            | 0.671              | <0.001      | 0.018         | 0.036      | 0.010        | 0.226         | 0.097       | 0.033          | 0.016        | 1.036        | 1.062         | 0.095       | 1.066        |

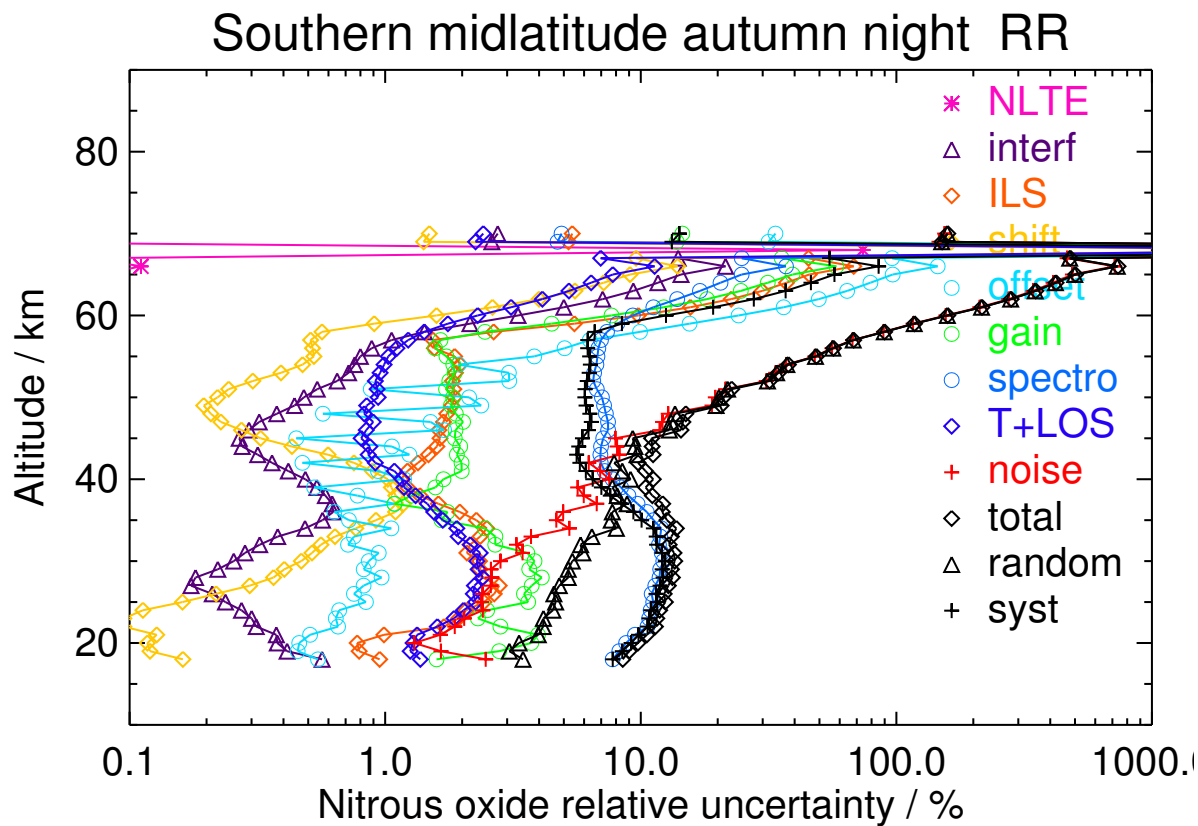

**Figure S230.** V8R\_N2O\_561 Southern midlatitude autumn night

**Table S231.** Nitrous oxide error budget for Southern polar winter day. All uncertainties are  $1\sigma$ .

| altitude<br>(km) | mean target<br>(ppbv) | NLTE<br>(ppbv) | interf<br>(ppbv) | ILS<br>(ppbv) | shift<br>(ppbv) | offset<br>(ppbv) | gain<br>(ppbv) | spectro<br>(ppbv) | T+LOS<br>(ppbv) | noise<br>(ppbv) | random<br>(ppbv) | syst<br>(ppbv) | total<br>(ppbv) |
|------------------|-----------------------|----------------|------------------|---------------|-----------------|------------------|----------------|-------------------|-----------------|-----------------|------------------|----------------|-----------------|
| 30               | 14.387                | <0.001         | 0.267            | 0.402         | 0.231           | 0.276            | 0.830          | 1.598             | 0.458           | 1.553           | 1.966            | 1.537          | 2.495           |
| 35               | 2.883                 | <0.001         | 0.060            | 0.189         | 0.048           | 0.109            | 0.242          | 0.550             | 0.125           | 0.646           | 0.862            | 0.323          | 0.921           |
| 40               | 1.329                 | <0.001         | 0.011            | 0.021         | 0.006           | 0.070            | 0.022          | 0.102             | 0.014           | 0.439           | 0.455            | 0.048          | 0.457           |
| 45               | 1.835                 | <0.001         | 0.014            | 0.028         | 0.005           | 0.020            | 0.021          | 0.095             | 0.011           | 0.396           | 0.402            | 0.076          | 0.409           |
| 50               | 1.320                 | <0.001         | 0.018            | 0.032         | 0.006           | 0.091            | 0.020          | 0.102             | 0.013           | 0.719           | 0.730            | 0.070          | 0.733           |
| 55               | 1.042                 | <0.001         | 0.015            | 0.030         | 0.009           | 0.059            | 0.013          | 0.064             | 0.011           | 0.898           | 0.902            | 0.050          | 0.903           |
| 60               | 0.292                 | <0.001         | 0.019            | 0.093         | 0.016           | 0.203            | 0.013          | 0.054             | 0.011           | 1.336           | 1.354            | 0.071          | 1.356           |
| 65               | -0.017                | <0.001         | 0.030            | 0.187         | 0.016           | 0.263            | 0.019          | 0.038             | 0.009           | 1.374           | 1.405            | 0.153          | 1.413           |

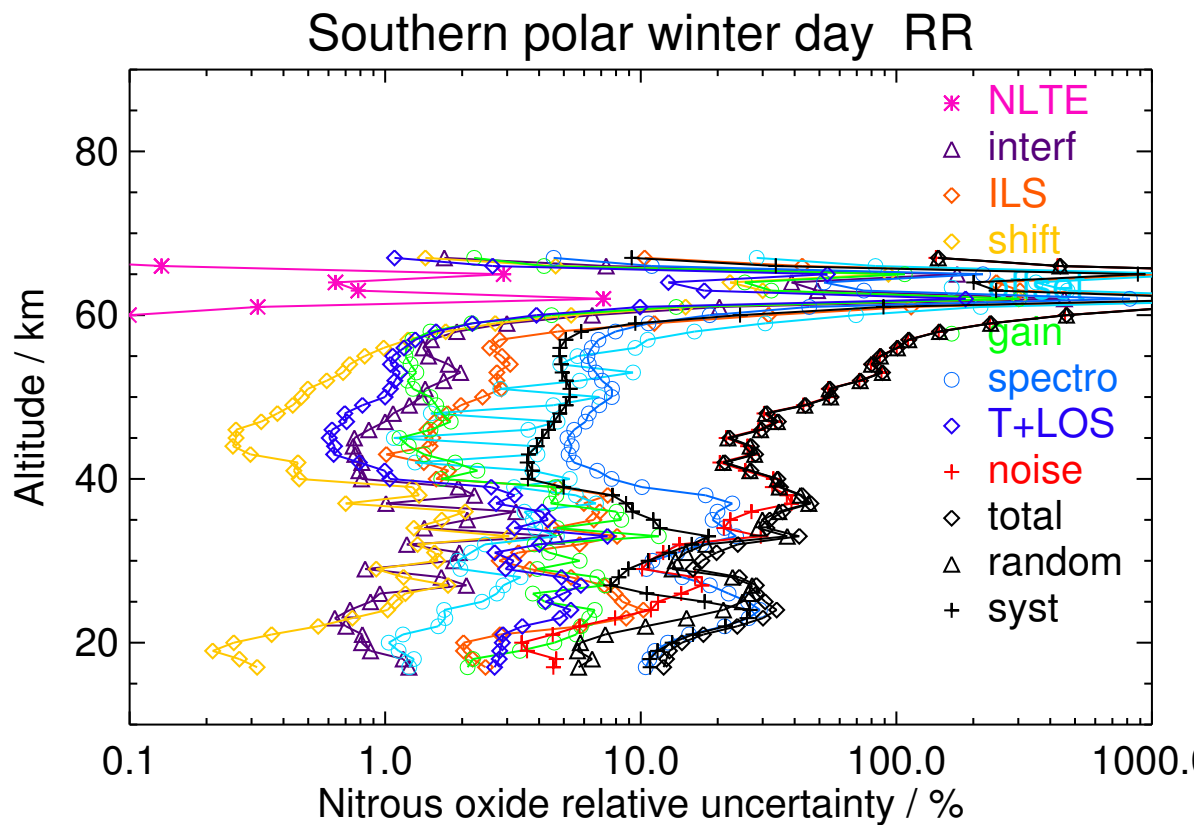**Figure S231.** V8R\_N2O\_561 Southern polar winter day

**Table S232.** Nitrous oxide error budget for Southern polar winter night. All uncertainties are  $1\sigma$ .

| altitude (km) | mean target (ppbv) | NLTE (ppbv) | interf (ppbv) | ILS (ppbv) | shift (ppbv) | offset (ppbv) | gain (ppbv) | spectro (ppbv) | T+LOS (ppbv) | noise (ppbv) | random (ppbv) | syst (ppbv) | total (ppbv) |
|---------------|--------------------|-------------|---------------|------------|--------------|---------------|-------------|----------------|--------------|--------------|---------------|-------------|--------------|
| 30            | 14.679             | <0.001      | 0.172         | 0.375      | 0.213        | 0.222         | 0.355       | 1.701          | 0.456        | 1.603        | 1.845         | 1.630       | 2.462        |
| 35            | 2.471              | <0.001      | 0.036         | 0.158      | 0.033        | 0.116         | 0.183       | 0.599          | 0.096        | 0.693        | 0.911         | 0.306       | 0.961        |
| 40            | 1.332              | <0.001      | 0.010         | 0.033      | 0.005        | 0.064         | 0.028       | 0.130          | 0.015        | 0.437        | 0.457         | 0.073       | 0.463        |
| 45            | 1.840              | <0.001      | 0.013         | 0.024      | 0.004        | 0.023         | 0.029       | 0.096          | 0.009        | 0.402        | 0.410         | 0.071       | 0.416        |
| 50            | 1.077              | <0.001      | 0.019         | 0.031      | 0.006        | 0.093         | 0.019       | 0.098          | 0.014        | 0.719        | 0.730         | 0.068       | 0.733        |
| 55            | 0.799              | <0.001      | 0.015         | 0.028      | 0.008        | 0.051         | 0.011       | 0.052          | 0.010        | 0.873        | 0.876         | 0.042       | 0.877        |
| 60            | 0.357              | <0.001      | 0.020         | 0.091      | 0.012        | 0.181         | 0.017       | 0.041          | 0.010        | 1.261        | 1.277         | 0.063       | 1.278        |
| 65            | -0.117             | <0.001      | 0.035         | 0.203      | 0.015        | 0.261         | 0.036       | 0.034          | 0.010        | 1.381        | 1.413         | 0.154       | 1.421        |

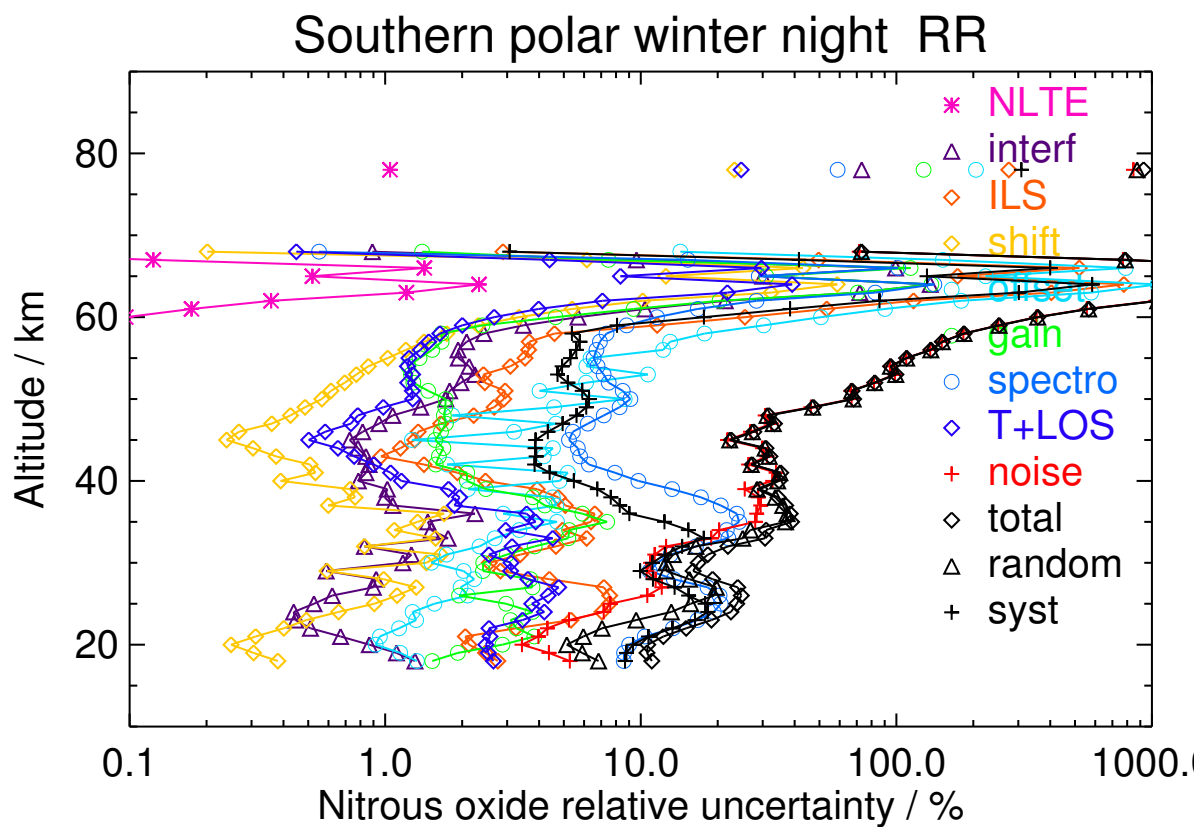

**Figure S232.** V8R\_N2O\_561 Southern polar winter night

**Table S233.** Nitrous oxide error budget for Southern polar spring day. All uncertainties are  $1\sigma$ .

| altitude (km) | mean target (ppbv) | NLTE (ppbv) | interf (ppbv) | ILS (ppbv) | shift (ppbv) | offset (ppbv) | gain (ppbv) | spectro (ppbv) | T+LOS (ppbv) | noise (ppbv) | random (ppbv) | syst (ppbv) | total (ppbv) |
|---------------|--------------------|-------------|---------------|------------|--------------|---------------|-------------|----------------|--------------|--------------|---------------|-------------|--------------|
| 30            | 49.744             | <0.001      | 0.261         | 1.974      | 0.542        | 0.461         | 3.773       | 7.543          | 0.645        | 1.860        | 7.365         | 5.024       | 8.915        |
| 35            | 17.422             | <0.001      | 0.076         | 0.456      | 0.128        | 0.112         | 0.451       | 1.866          | 0.237        | 0.661        | 1.464         | 1.509       | 2.102        |
| 40            | 5.769              | <0.001      | 0.017         | 0.039      | 0.030        | 0.066         | 0.065       | 0.430          | 0.056        | 0.389        | 0.457         | 0.376       | 0.592        |
| 45            | 2.627              | <0.001      | 0.013         | 0.042      | 0.011        | 0.017         | 0.037       | 0.147          | 0.023        | 0.324        | 0.338         | 0.129       | 0.362        |
| 50            | 1.940              | <0.001      | 0.017         | 0.039      | 0.007        | 0.087         | 0.031       | 0.130          | 0.016        | 0.605        | 0.616         | 0.117       | 0.627        |
| 55            | 1.123              | <0.001      | 0.015         | 0.043      | 0.012        | 0.056         | 0.026       | 0.086          | 0.013        | 0.795        | 0.800         | 0.074       | 0.804        |
| 60            | 0.428              | <0.001      | 0.021         | 0.081      | 0.014        | 0.133         | 0.032       | 0.068          | 0.012        | 1.082        | 1.093         | 0.079       | 1.096        |
| 65            | 0.899              | <0.001      | 0.062         | 0.376      | 0.078        | 0.239         | 0.187       | 0.183          | 0.026        | 1.341        | 1.377         | 0.427       | 1.441        |

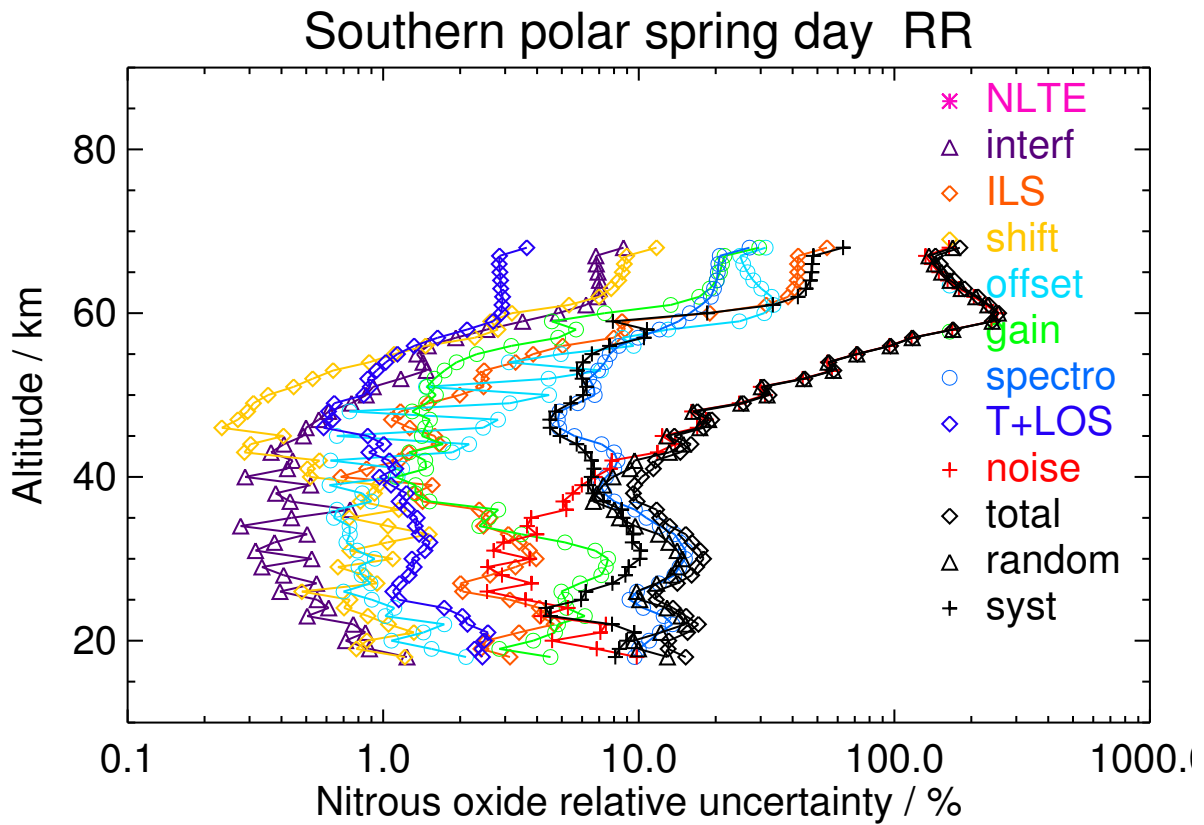

**Figure S233.** V8R\_N2O\_561 Southern polar spring day

**Table S234.** Nitrous oxide error budget for Southern polar spring night. All uncertainties are  $1\sigma$ .

| altitude (km) | mean target (ppbv) | NLTE (ppbv) | interf (ppbv) | ILS (ppbv) | shift (ppbv) | offset (ppbv) | gain (ppbv) | spectro (ppbv) | T+LOS (ppbv) | noise (ppbv) | random (ppbv) | syst (ppbv) | total (ppbv) |
|---------------|--------------------|-------------|---------------|------------|--------------|---------------|-------------|----------------|--------------|--------------|---------------|-------------|--------------|
| 30            | 66.450             | <0.001      | 0.280         | 2.144      | 0.470        | 0.623         | 5.928       | 7.947          | 0.758        | 1.731        | 8.095         | 6.451       | 10.351       |
| 35            | 15.368             | <0.001      | 0.080         | 0.622      | 0.137        | 0.124         | 0.522       | 2.419          | 0.279        | 0.662        | 2.026         | 1.721       | 2.658        |
| 40            | 5.624              | <0.001      | 0.016         | 0.029      | 0.020        | 0.074         | 0.091       | 0.449          | 0.058        | 0.419        | 0.492         | 0.391       | 0.629        |
| 45            | 2.662              | <0.001      | 0.012         | 0.042      | 0.009        | 0.018         | 0.049       | 0.154          | 0.021        | 0.333        | 0.347         | 0.139       | 0.374        |
| 50            | 1.793              | <0.001      | 0.016         | 0.039      | 0.008        | 0.078         | 0.044       | 0.115          | 0.014        | 0.586        | 0.596         | 0.102       | 0.605        |
| 55            | 1.152              | <0.001      | 0.015         | 0.047      | 0.013        | 0.067         | 0.039       | 0.095          | 0.013        | 0.855        | 0.861         | 0.088       | 0.866        |
| 60            | 0.791              | <0.001      | 0.021         | 0.105      | 0.017        | 0.148         | 0.072       | 0.082          | 0.014        | 1.132        | 1.146         | 0.111       | 1.152        |
| 65            | 0.097              | <0.001      | 0.047         | 0.350      | 0.069        | 0.250         | 0.245       | 0.207          | 0.027        | 1.363        | 1.409         | 0.412       | 1.468        |

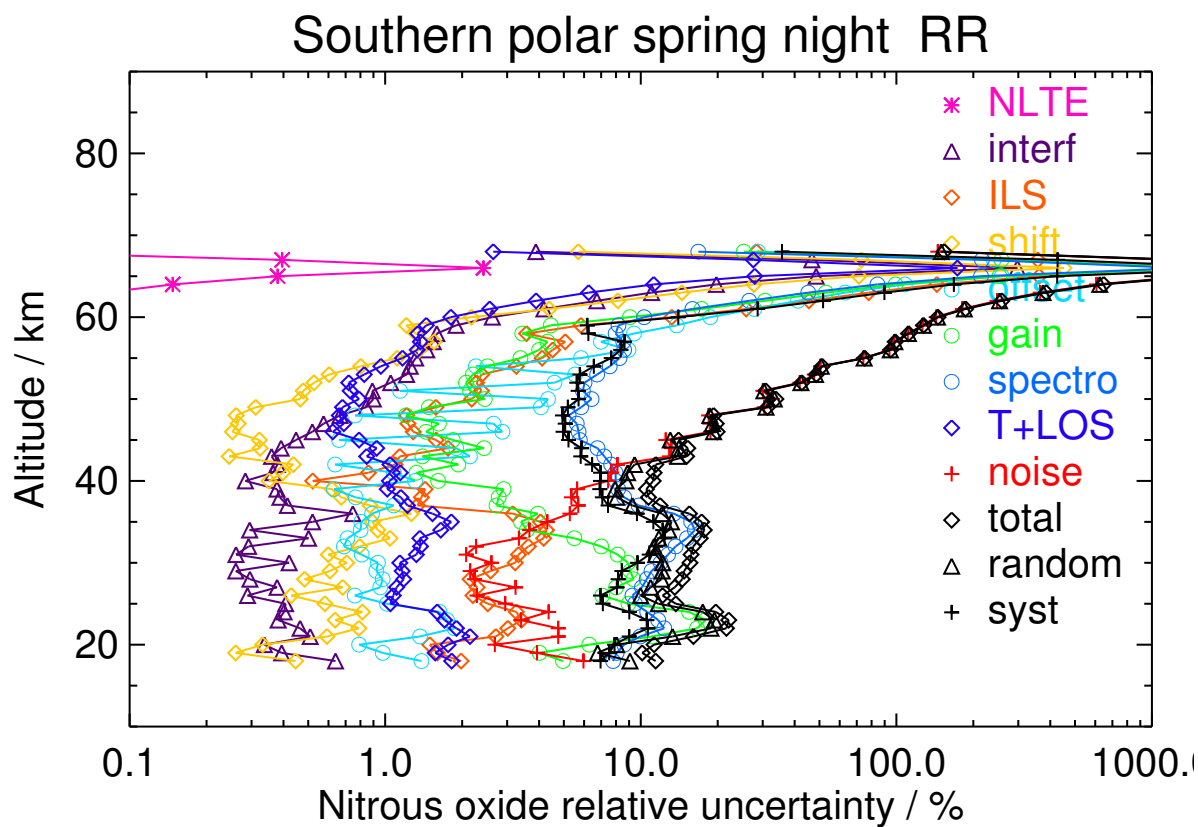

**Figure S234.** V8R\_N2O\_561 Southern polar spring night



**Table S235.** Nitrous oxide error budget for Southern polar summer day. All uncertainties are  $1\sigma$ .

| altitude (km) | mean target (ppbv) | NLTE (ppbv) | interf (ppbv) | ILS (ppbv) | shift (ppbv) | offset (ppbv) | gain (ppbv) | spectro (ppbv) | T+LOS (ppbv) | noise (ppbv) | random (ppbv) | syst (ppbv) | total (ppbv) |
|---------------|--------------------|-------------|---------------|------------|--------------|---------------|-------------|----------------|--------------|--------------|---------------|-------------|--------------|
| 30            | 73.175             | <0.001      | 0.112         | 1.211      | 0.247        | 0.729         | 4.531       | 6.894          | 1.429        | 1.672        | 2.907         | 8.156       | 8.658        |
| 35            | 29.042             | <0.001      | 0.087         | 0.636      | 0.316        | 0.217         | 0.885       | 2.480          | 0.469        | 0.865        | 1.191         | 2.654       | 2.909        |
| 40            | 7.541              | <0.001      | 0.026         | 0.046      | 0.079        | 0.057         | 0.049       | 0.612          | 0.089        | 0.336        | 0.416         | 0.580       | 0.714        |
| 45            | 1.231              | <0.001      | 0.009         | 0.037      | 0.007        | 0.027         | 0.026       | 0.111          | 0.028        | 0.263        | 0.273         | 0.105       | 0.292        |
| 50            | 0.111              | <0.001      | 0.013         | 0.009      | 0.005        | 0.060         | 0.008       | 0.029          | 0.006        | 0.388        | 0.394         | 0.009       | 0.395        |
| 55            | 0.033              | <0.001      | 0.013         | 0.009      | 0.004        | 0.071         | 0.007       | 0.026          | 0.007        | 0.609        | 0.614         | 0.012       | 0.614        |
| 60            | 0.303              | <0.001      | 0.012         | 0.033      | 0.016        | 0.073         | 0.015       | 0.040          | 0.008        | 0.788        | 0.792         | 0.042       | 0.793        |
| 65            | 0.814              | <0.001      | 0.036         | 0.153      | 0.032        | 0.183         | 0.079       | 0.085          | 0.013        | 1.091        | 1.109         | 0.182       | 1.124        |
| 70            | 0.430              | <0.001      | 0.039         | 0.213      | 0.053        | 0.182         | 0.084       | 0.123          | 0.012        | 0.949        | 0.971         | 0.252       | 1.003        |

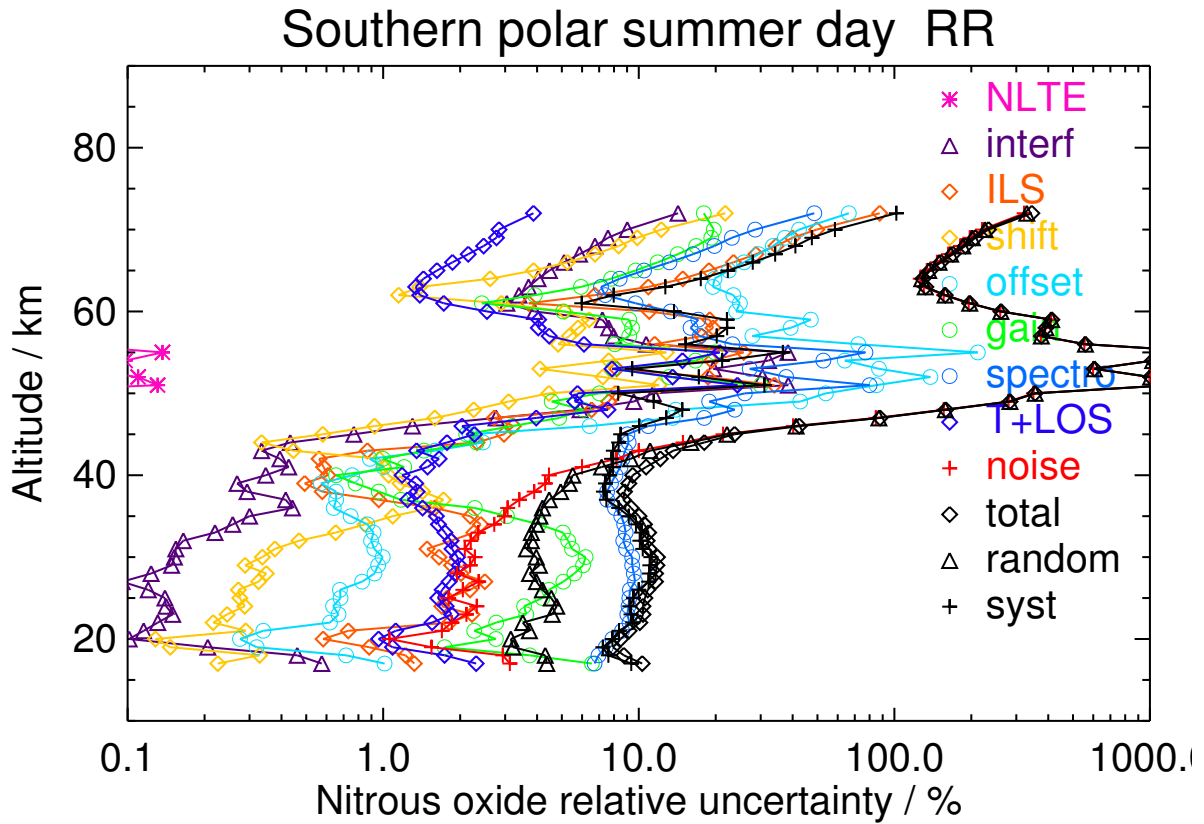

**Figure S235.** V8R\_N2O\_561 Southern polar summer day

**Table S236.** Nitrous oxide error budget for Southern polar summer night. All uncertainties are  $1\sigma$ .

| altitude (km) | mean target (ppbv) | NLTE (ppbv) | interf (ppbv) | ILS (ppbv) | shift (ppbv) | offset (ppbv) | gain (ppbv) | spectro (ppbv) | T+LOS (ppbv) | noise (ppbv) | random (ppbv) | syst (ppbv) | total (ppbv) |
|---------------|--------------------|-------------|---------------|------------|--------------|---------------|-------------|----------------|--------------|--------------|---------------|-------------|--------------|
| 30            | 56.428             | <0.001      | 0.104         | 1.280      | 0.249        | 0.707         | 4.303       | 6.013          | 1.403        | 1.649        | 2.755         | 7.347       | 7.847        |
| 35            | 16.503             | <0.001      | 0.091         | 0.506      | 0.122        | 0.145         | 0.337       | 1.827          | 0.307        | 0.751        | 0.909         | 1.893       | 2.100        |
| 40            | 2.281              | <0.001      | 0.013         | 0.017      | 0.008        | 0.057         | 0.058       | 0.267          | 0.043        | 0.313        | 0.331         | 0.261       | 0.422        |
| 45            | 0.260              | <0.001      | 0.009         | 0.013      | 0.004        | 0.026         | 0.020       | 0.036          | 0.010        | 0.287        | 0.291         | 0.020       | 0.292        |
| 50            | 0.037              | <0.001      | 0.014         | 0.009      | 0.003        | 0.069         | 0.008       | 0.030          | 0.005        | 0.503        | 0.509         | 0.011       | 0.509        |
| 55            | -0.042             | <0.001      | 0.014         | 0.015      | 0.006        | 0.071         | 0.013       | 0.034          | 0.007        | 0.762        | 0.767         | 0.020       | 0.767        |
| 60            | -0.101             | <0.001      | 0.014         | 0.017      | 0.005        | 0.119         | 0.015       | 0.031          | 0.007        | 0.991        | 0.999         | 0.021       | 0.999        |
| 65            | -0.398             | <0.001      | 0.037         | 0.111      | 0.030        | 0.242         | 0.155       | 0.081          | 0.024        | 1.300        | 1.325         | 0.199       | 1.340        |
| 70            | -0.124             | <0.001      | 0.041         | 0.122      | 0.035        | 0.194         | 0.142       | 0.094          | 0.021        | 0.949        | 0.971         | 0.207       | 0.993        |

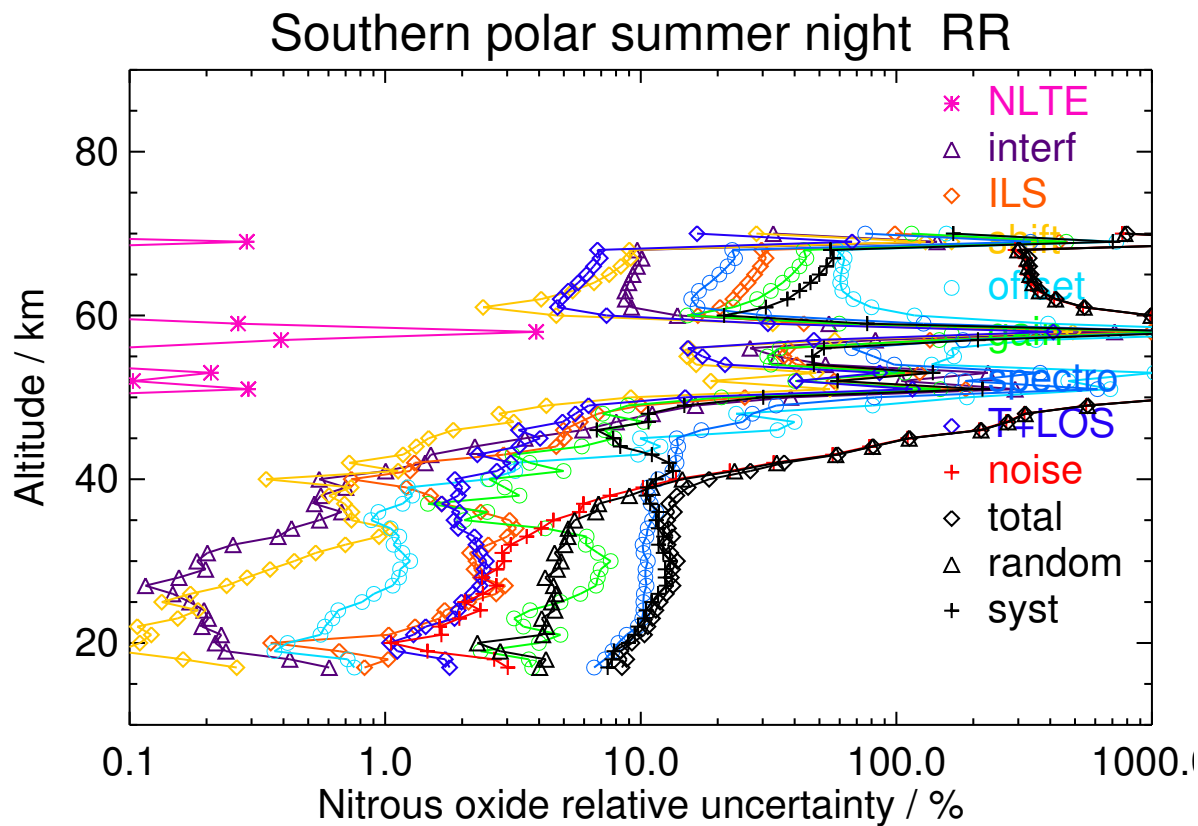

**Figure S236.** V8R\_N2O\_561 Southern polar summer night

**Table S237.** Nitrous oxide error budget for Southern polar autumn day. All uncertainties are  $1\sigma$ .

| altitude (km) | mean target (ppbv) | NLTE (ppbv) | interf (ppbv) | ILS (ppbv) | shift (ppbv) | offset (ppbv) | gain (ppbv) | spectro (ppbv) | T+LOS (ppbv) | noise (ppbv) | random (ppbv) | syst (ppbv) | total (ppbv) |
|---------------|--------------------|-------------|---------------|------------|--------------|---------------|-------------|----------------|--------------|--------------|---------------|-------------|--------------|
| 30            | 32.446             | <0.001      | 0.094         | 1.167      | 0.108        | 0.266         | 1.898       | 5.817          | 0.895        | 1.661        | 3.094         | 5.734       | 6.516        |
| 35            | 3.729              | <0.001      | 0.022         | 0.196      | 0.018        | 0.134         | 0.266       | 0.871          | 0.142        | 0.761        | 0.995         | 0.704       | 1.219        |
| 40            | 0.042              | <0.001      | 0.008         | 0.010      | 0.004        | 0.084         | 0.037       | 0.044          | 0.011        | 0.571        | 0.579         | 0.023       | 0.580        |
| 45            | 0.035              | <0.001      | 0.012         | 0.010      | 0.003        | 0.029         | 0.011       | 0.047          | 0.007        | 0.540        | 0.543         | 0.011       | 0.543        |
| 50            | 1.046              | <0.001      | 0.018         | 0.014      | 0.007        | 0.099         | 0.038       | 0.071          | 0.013        | 0.865        | 0.873         | 0.047       | 0.875        |
| 55            | 0.709              | <0.001      | 0.016         | 0.025      | 0.011        | 0.059         | 0.052       | 0.068          | 0.015        | 0.970        | 0.974         | 0.066       | 0.976        |
| 60            | 0.333              | <0.001      | 0.013         | 0.012      | 0.011        | 0.216         | 0.045       | 0.048          | 0.014        | 1.377        | 1.395         | 0.047       | 1.396        |
| 65            | 0.046              | <0.001      | 0.012         | 0.022      | 0.006        | 0.283         | 0.062       | 0.033          | 0.014        | 1.424        | 1.454         | 0.040       | 1.454        |

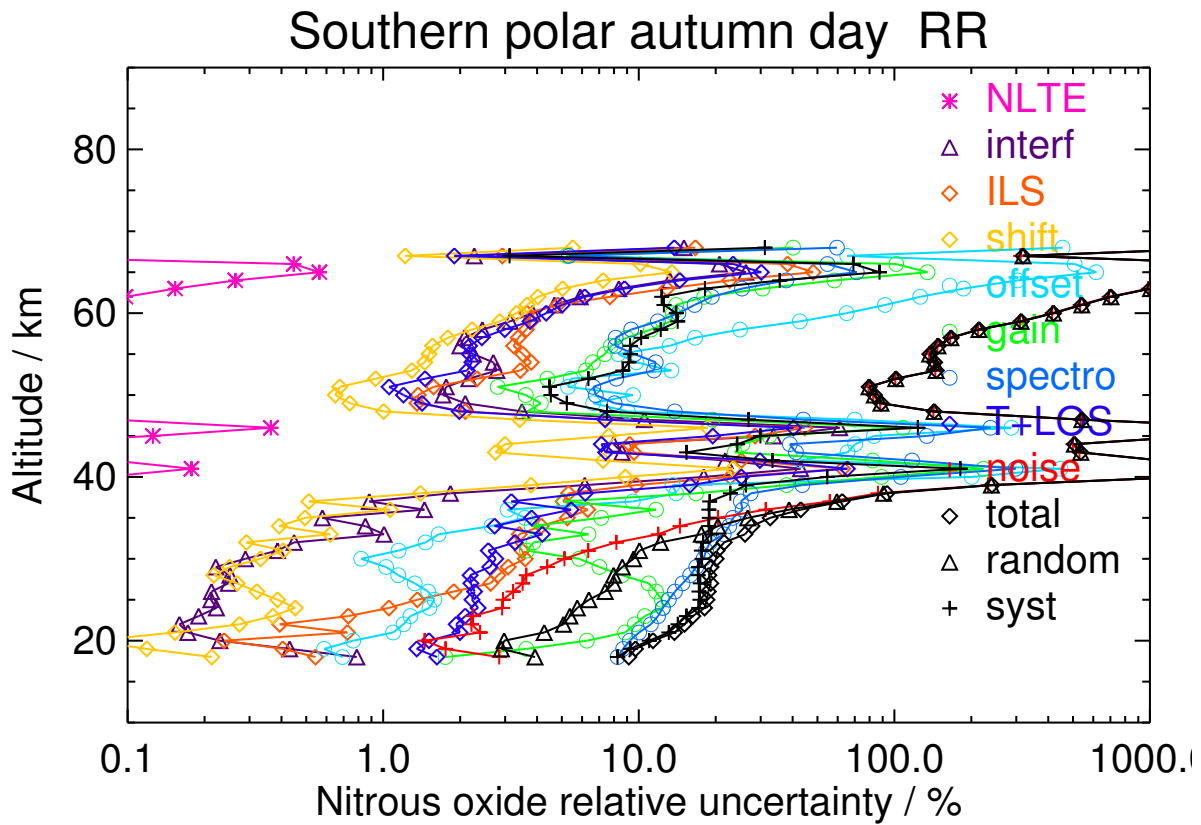

**Figure S237.** V8R\_N2O\_561 Southern polar autumn day

**Table S238.** Nitrous oxide error budget for Southern polar autumn night. All uncertainties are  $1\sigma$ .

| altitude (km) | mean target (ppbv) | NLTE (ppbv) | interf (ppbv) | ILS (ppbv) | shift (ppbv) | offset (ppbv) | gain (ppbv) | spectro (ppbv) | T+LOS (ppbv) | noise (ppbv) | random (ppbv) | syst (ppbv) | total (ppbv) |
|---------------|--------------------|-------------|---------------|------------|--------------|---------------|-------------|----------------|--------------|--------------|---------------|-------------|--------------|
| 30            | 24.587             | <0.001      | 0.117         | 0.914      | 0.122        | 0.280         | 1.265       | 4.600          | 0.840        | 1.647        | 2.773         | 4.408       | 5.208        |
| 35            | 1.919              | <0.001      | 0.023         | 0.159      | 0.018        | 0.118         | 0.256       | 0.624          | 0.118        | 0.686        | 0.876         | 0.462       | 0.990        |
| 40            | 0.180              | <0.001      | 0.008         | 0.010      | 0.003        | 0.085         | 0.027       | 0.058          | 0.011        | 0.595        | 0.604         | 0.027       | 0.604        |
| 45            | 0.184              | <0.001      | 0.012         | 0.010      | 0.003        | 0.029         | 0.016       | 0.049          | 0.008        | 0.555        | 0.558         | 0.018       | 0.558        |
| 50            | 0.686              | <0.001      | 0.018         | 0.014      | 0.006        | 0.096         | 0.030       | 0.057          | 0.011        | 0.866        | 0.873         | 0.036       | 0.874        |
| 55            | 0.940              | <0.001      | 0.016         | 0.017      | 0.010        | 0.061         | 0.045       | 0.062          | 0.016        | 0.994        | 0.998         | 0.056       | 0.999        |
| 60            | 0.600              | <0.001      | 0.013         | 0.012      | 0.008        | 0.212         | 0.033       | 0.058          | 0.014        | 1.361        | 1.378         | 0.040       | 1.379        |
| 65            | 0.058              | <0.001      | 0.013         | 0.019      | 0.005        | 0.283         | 0.088       | 0.041          | 0.021        | 1.427        | 1.457         | 0.074       | 1.459        |

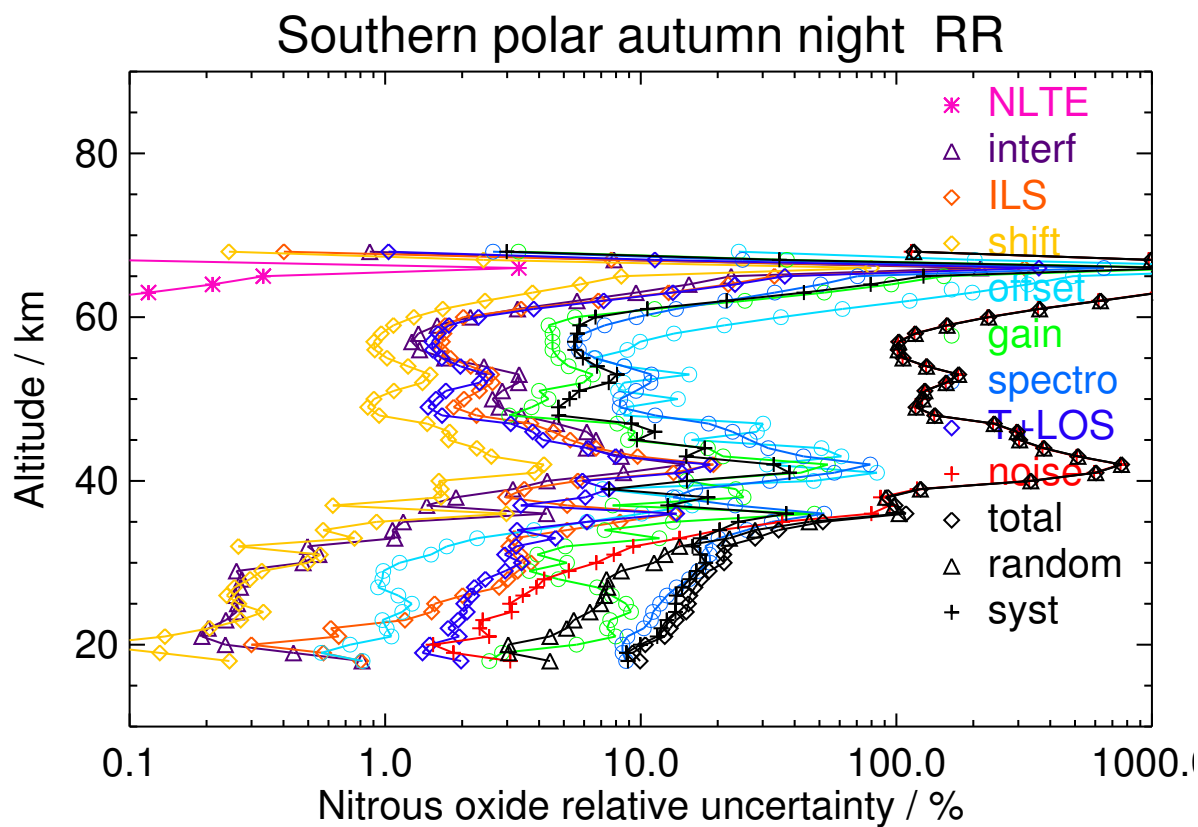

**Figure S238.** V8R\_N2O\_561 Southern polar autumn night

**S9 Nitrous oxide error contribution profile plots and tabulated values for RR UA data (V8R\_N2O\_662)**

**Table S239.** Nitrous oxide error budget for Northern polar winter day. All uncertainties are  $1\sigma$ .

| altitude (km) | mean target (ppbv) | NLTE (ppbv) | interf (ppbv) | ILS (ppbv) | shift (ppbv) | offset (ppbv) | gain (ppbv) | spectro (ppbv) | T+LOS (ppbv) | noise (ppbv) | random (ppbv) | syst (ppbv) | total (ppbv) |
|---------------|--------------------|-------------|---------------|------------|--------------|---------------|-------------|----------------|--------------|--------------|---------------|-------------|--------------|
| 40            | 6.874              | <0.001      | 0.024         | 0.152      | 0.011        | 0.145         | 0.154       | 0.686          | 0.109        | 1.180        | 1.202         | 0.706       | 1.394        |
| 45            | 1.744              | <0.001      | 0.015         | 0.049      | 0.005        | 0.063         | 0.033       | 0.213          | 0.037        | 0.529        | 0.541         | 0.204       | 0.578        |
| 50            | 0.522              | <0.001      | 0.007         | 0.012      | 0.003        | 0.054         | 0.008       | 0.047          | 0.008        | 0.353        | 0.358         | 0.046       | 0.361        |
| 55            | 0.761              | <0.001      | 0.010         | 0.011      | 0.005        | 0.120         | 0.012       | 0.043          | 0.007        | 0.708        | 0.719         | 0.040       | 0.720        |
| 60            | 2.526              | <0.001      | 0.020         | 0.032      | 0.009        | 0.451         | 0.046       | 0.132          | 0.037        | 2.477        | 2.519         | 0.123       | 2.522        |
| 65            | 5.001              | <0.001      | 0.026         | 0.083      | 0.012        | 1.169         | 0.104       | 0.292          | 0.111        | 6.005        | 6.121         | 0.286       | 6.128        |
| 70            | 5.085              | <0.001      | 0.023         | 0.090      | 0.011        | 1.459         | 0.107       | 0.294          | 0.116        | 7.207        | 7.356         | 0.280       | 7.361        |
| 74            | 4.619              | <0.001      | 0.015         | 0.058      | 0.009        | 1.361         | 0.067       | 0.188          | 0.107        | 6.308        | 6.454         | 0.208       | 6.458        |

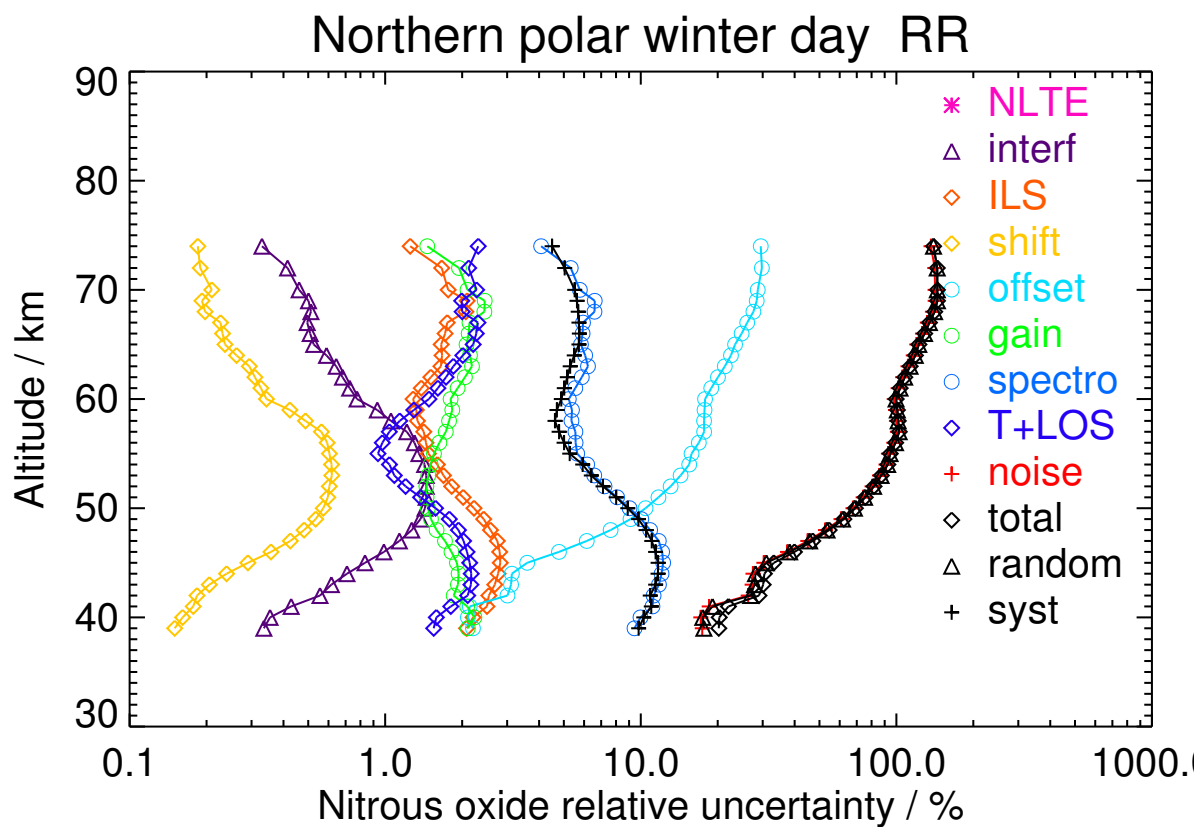

**Figure S239.** V8R\_N2O\_662 Northern polar winter day

**Table S240.** Nitrous oxide error budget for Northern polar winter night. All uncertainties are  $1\sigma$ .

| altitude (km) | mean target (ppbv) | NLTE (ppbv) | interf (ppbv) | ILS (ppbv) | shift (ppbv) | offset (ppbv) | gain (ppbv) | spectro (ppbv) | T+LOS (ppbv) | noise (ppbv) | random (ppbv) | syst (ppbv) | total (ppbv) |
|---------------|--------------------|-------------|---------------|------------|--------------|---------------|-------------|----------------|--------------|--------------|---------------|-------------|--------------|
| 45            | 0.313              | <0.001      | 0.007         | 0.004      | 0.003        | 0.020         | 0.002       | 0.013          | 0.003        | 0.179        | 0.180         | 0.011       | 0.181        |
| 50            | 0.266              | <0.001      | 0.008         | 0.004      | 0.004        | 0.030         | 0.003       | 0.012          | 0.002        | 0.198        | 0.201         | 0.011       | 0.201        |
| 55            | 0.374              | <0.001      | 0.009         | 0.005      | 0.006        | 0.058         | 0.004       | 0.017          | 0.002        | 0.331        | 0.337         | 0.015       | 0.337        |
| 60            | 0.909              | <0.001      | 0.013         | 0.010      | 0.009        | 0.141         | 0.007       | 0.049          | 0.007        | 0.816        | 0.829         | 0.036       | 0.830        |
| 65            | 6.779              | <0.001      | 0.020         | 0.112      | 0.012        | 0.547         | 0.099       | 0.313          | 0.087        | 3.448        | 3.503         | 0.215       | 3.510        |
| 70            | 7.663              | <0.001      | 0.017         | 0.076      | 0.010        | 0.687         | 0.075       | 0.216          | 0.116        | 5.079        | 5.129         | 0.195       | 5.132        |
| 74            | 25.061             | 0.001       | 0.035         | 0.243      | 0.048        | 2.873         | 0.237       | 0.728          | 0.654        | 21.410       | 21.612        | 0.802       | 21.627       |

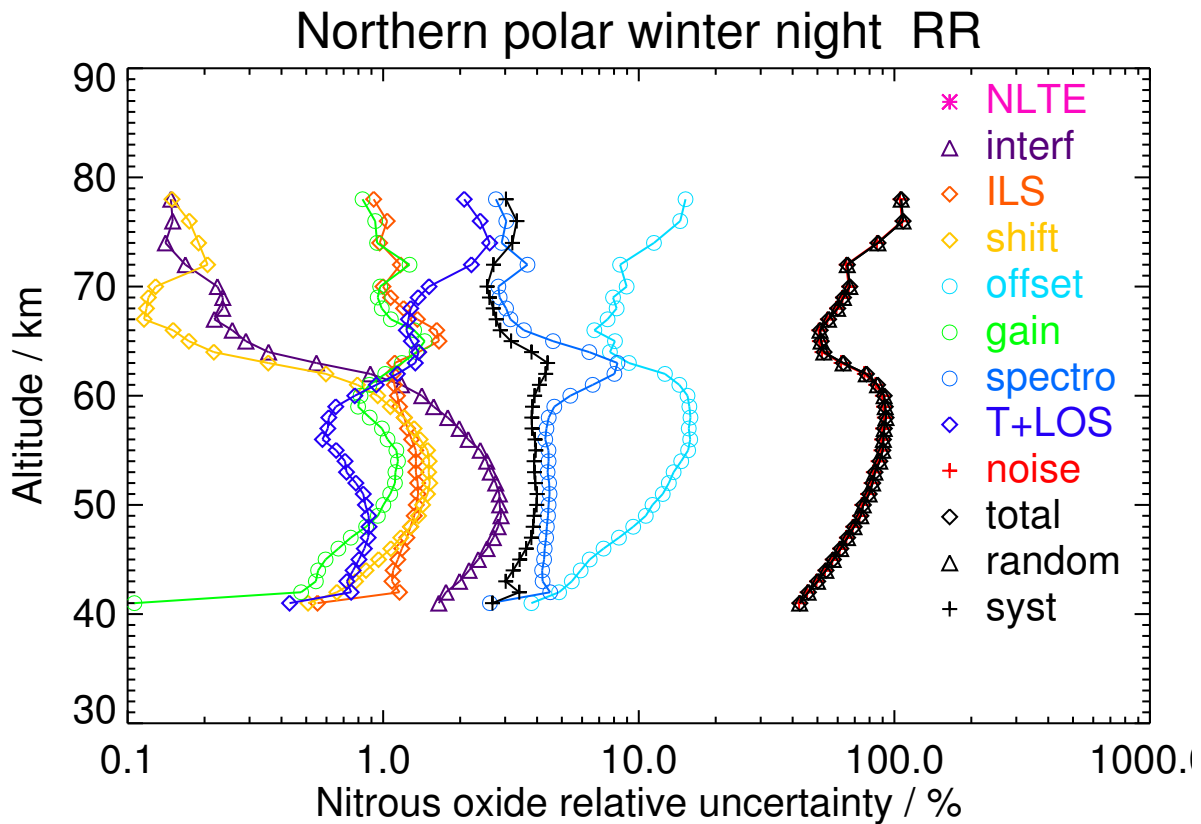

**Figure S240.** V8R\_N2O\_662 Northern polar winter night

**Table S241.** Nitrous oxide error budget for Northern polar spring day. All uncertainties are  $1\sigma$ .

| altitude<br>(km) | mean target<br>(ppbv) | NLTE<br>(ppbv) | interf<br>(ppbv) | ILS<br>(ppbv) | shift<br>(ppbv) | offset<br>(ppbv) | gain<br>(ppbv) | spectro<br>(ppbv) | T+LOS<br>(ppbv) | noise<br>(ppbv) | random<br>(ppbv) | syst<br>(ppbv) | total<br>(ppbv) |
|------------------|-----------------------|----------------|------------------|---------------|-----------------|------------------|----------------|-------------------|-----------------|-----------------|------------------|----------------|-----------------|
| 45               | 0.845                 | <0.001         | 0.007            | 0.030         | 0.005           | 0.013            | 0.027          | 0.105             | 0.009           | 0.152           | 0.180            | 0.058          | 0.190           |
| 50               | 0.517                 | <0.001         | 0.008            | 0.010         | 0.004           | 0.018            | 0.007          | 0.037             | 0.003           | 0.175           | 0.179            | 0.023          | 0.180           |
| 55               | 0.319                 | <0.001         | 0.007            | 0.005         | 0.004           | 0.033            | 0.003          | 0.020             | 0.003           | 0.224           | 0.227            | 0.015          | 0.228           |
| 60               | 0.511                 | <0.001         | 0.009            | 0.004         | 0.006           | 0.073            | 0.004          | 0.026             | 0.003           | 0.439           | 0.445            | 0.018          | 0.446           |
| 65               | 1.366                 | <0.001         | 0.017            | 0.019         | 0.013           | 0.274            | 0.013          | 0.062             | 0.013           | 1.554           | 1.578            | 0.053          | 1.579           |
| 70               | 2.341                 | <0.001         | 0.024            | 0.059         | 0.020           | 0.564            | 0.022          | 0.087             | 0.029           | 3.014           | 3.067            | 0.103          | 3.069           |

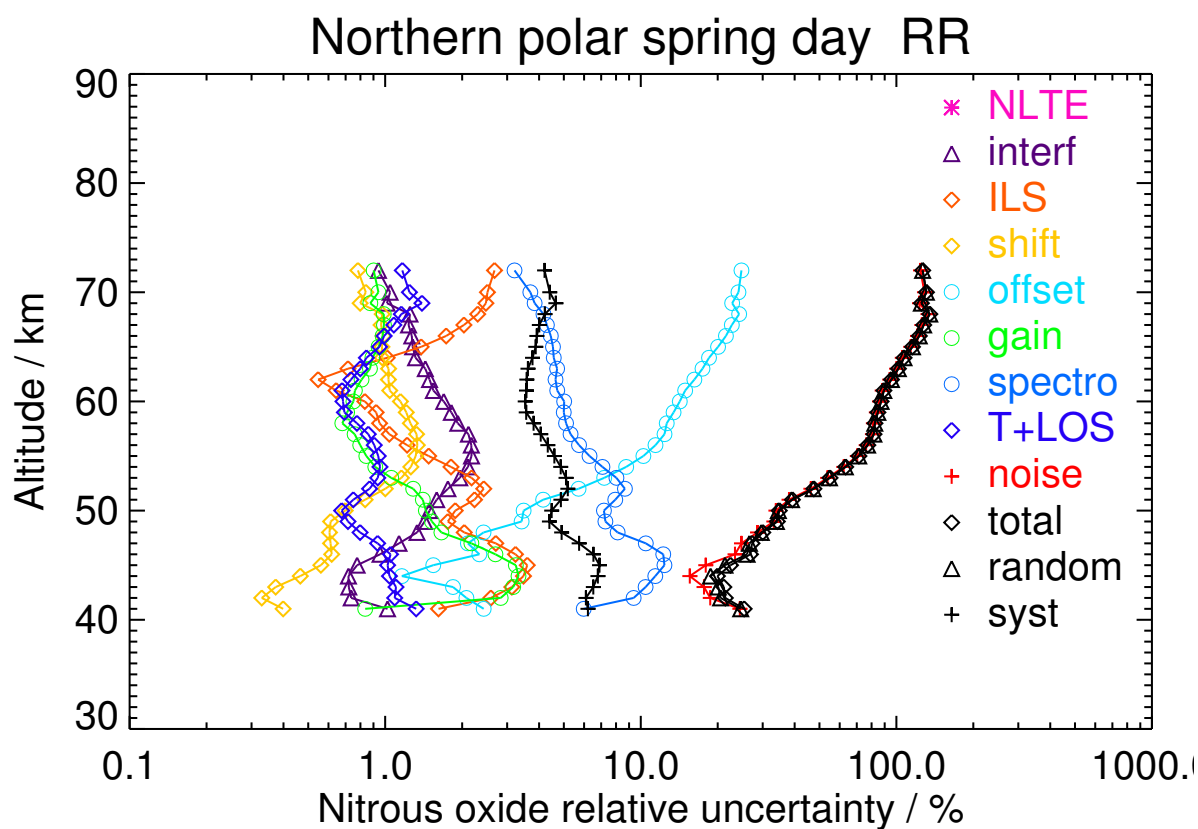

**Figure S241.** V8R\_N2O\_662 Northern polar spring day



**Table S242.** Nitrous oxide error budget for Northern polar spring night. All uncertainties are  $1\sigma$ .

| altitude (km) | mean target (ppbv) | NLTE (ppbv) | interf (ppbv) | ILS (ppbv) | shift (ppbv) | offset (ppbv) | gain (ppbv) | spectro (ppbv) | T+LOS (ppbv) | noise (ppbv) | random (ppbv) | syst (ppbv) | total (ppbv) |
|---------------|--------------------|-------------|---------------|------------|--------------|---------------|-------------|----------------|--------------|--------------|---------------|-------------|--------------|
| 40            | 3.346              | <0.001      | 0.010         | 0.065      | 0.006        | 0.040         | 0.064       | 0.300          | 0.045        | 0.317        | 0.323         | 0.313       | 0.450        |
| 45            | 1.192              | <0.001      | 0.009         | 0.037      | 0.006        | 0.021         | 0.023       | 0.128          | 0.016        | 0.225        | 0.240         | 0.108       | 0.264        |
| 50            | 0.781              | <0.001      | 0.008         | 0.016      | 0.004        | 0.021         | 0.017       | 0.068          | 0.006        | 0.209        | 0.219         | 0.037       | 0.222        |
| 55            | 0.526              | <0.001      | 0.008         | 0.013      | 0.005        | 0.041         | 0.006       | 0.046          | 0.005        | 0.307        | 0.312         | 0.030       | 0.314        |
| 60            | 0.480              | <0.001      | 0.007         | 0.003      | 0.005        | 0.073         | 0.004       | 0.026          | 0.004        | 0.463        | 0.469         | 0.020       | 0.469        |
| 65            | 0.750              | <0.001      | 0.014         | 0.009      | 0.008        | 0.199         | 0.006       | 0.031          | 0.005        | 1.137        | 1.155         | 0.026       | 1.155        |

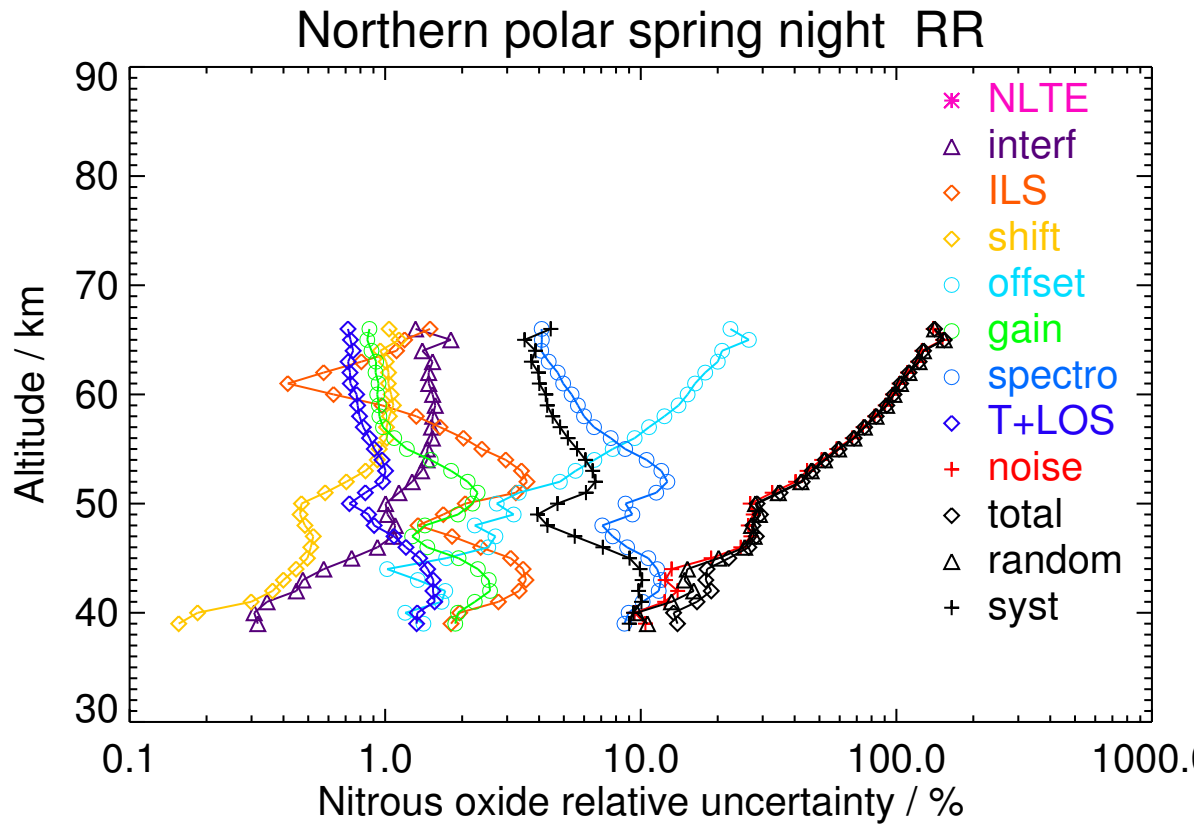

**Figure S242.** V8R\_N2O\_662 Northern polar spring night

**Table S243.** Nitrous oxide error budget for Northern polar summer day. All uncertainties are  $1\sigma$ .

| altitude (km) | mean target (ppbv) | NLTE (ppbv) | interf (ppbv) | ILS (ppbv) | shift (ppbv) | offset (ppbv) | gain (ppbv) | spectro (ppbv) | T+LOS (ppbv) | noise (ppbv) | random (ppbv) | syst (ppbv) | total (ppbv) |
|---------------|--------------------|-------------|---------------|------------|--------------|---------------|-------------|----------------|--------------|--------------|---------------|-------------|--------------|
| 45            | 0.568              | <0.001      | 0.005         | 0.010      | 0.003        | 0.010         | 0.007       | 0.044          | 0.008        | 0.111        | 0.112         | 0.044       | 0.120        |
| 50            | 0.128              | <0.001      | 0.004         | 0.002      | 0.002        | 0.010         | 0.002       | 0.007          | 0.002        | 0.073        | 0.074         | 0.008       | 0.074        |
| 55            | 0.112              | <0.001      | 0.004         | 0.001      | 0.002        | 0.015         | 0.003       | 0.005          | 0.002        | 0.095        | 0.097         | 0.005       | 0.097        |
| 60            | 0.190              | <0.001      | 0.006         | 0.002      | 0.003        | 0.037         | 0.004       | 0.007          | 0.003        | 0.217        | 0.220         | 0.008       | 0.221        |
| 65            | 0.505              | <0.001      | 0.013         | 0.015      | 0.008        | 0.125         | 0.006       | 0.017          | 0.006        | 0.701        | 0.712         | 0.023       | 0.712        |
| 70            | 1.168              | <0.001      | 0.027         | 0.044      | 0.016        | 0.339         | 0.009       | 0.038          | 0.013        | 1.809        | 1.841         | 0.059       | 1.842        |

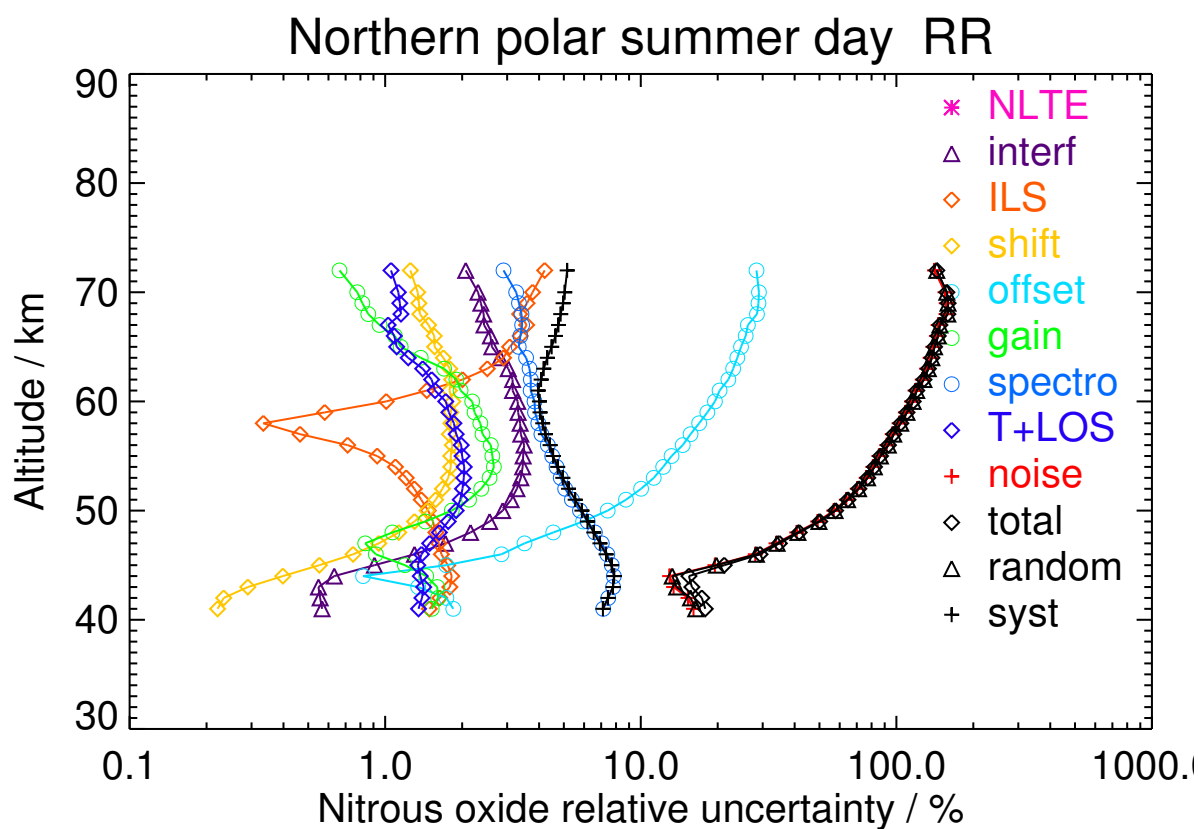

**Figure S243.** V8R\_N2O\_662 Northern polar summer day

**Table S244.** Nitrous oxide error budget for Northern polar summer night. All uncertainties are  $1\sigma$ .

| altitude<br>(km) | mean target<br>(ppbv) | NLTE<br>(ppbv) | interf<br>(ppbv) | ILS<br>(ppbv) | shift<br>(ppbv) | offset<br>(ppbv) | gain<br>(ppbv) | spectro<br>(ppbv) | T+LOS<br>(ppbv) | noise<br>(ppbv) | random<br>(ppbv) | syst<br>(ppbv) | total<br>(ppbv) |
|------------------|-----------------------|----------------|------------------|---------------|-----------------|------------------|----------------|-------------------|-----------------|-----------------|------------------|----------------|-----------------|
| 45               | 0.408                 | <0.001         | 0.005            | 0.008         | 0.002           | 0.008            | 0.004          | 0.034             | 0.005           | 0.104           | 0.106            | 0.030          | 0.110           |
| 50               | 0.201                 | <0.001         | 0.005            | 0.003         | 0.002           | 0.011            | 0.002          | 0.010             | 0.002           | 0.104           | 0.105            | 0.009          | 0.105           |
| 55               | 0.374                 | <0.001         | 0.008            | 0.005         | 0.004           | 0.029            | 0.004          | 0.020             | 0.003           | 0.216           | 0.218            | 0.013          | 0.219           |
| 60               | 0.599                 | <0.001         | 0.011            | 0.003         | 0.007           | 0.075            | 0.004          | 0.027             | 0.004           | 0.467           | 0.473            | 0.021          | 0.474           |
| 65               | 1.574                 | <0.001         | 0.021            | 0.023         | 0.015           | 0.268            | 0.022          | 0.094             | 0.023           | 1.577           | 1.601            | 0.068          | 1.603           |
| 70               | 6.160                 | <0.001         | 0.058            | 0.132         | 0.046           | 1.364            | 0.096          | 0.328             | 0.173           | 7.716           | 7.839            | 0.340          | 7.846           |
| 74               | 6.269                 | <0.001         | 0.037            | 0.149         | 0.034           | 1.451            | 0.097          | 0.269             | 0.190           | 7.800           | 7.936            | 0.322          | 7.943           |

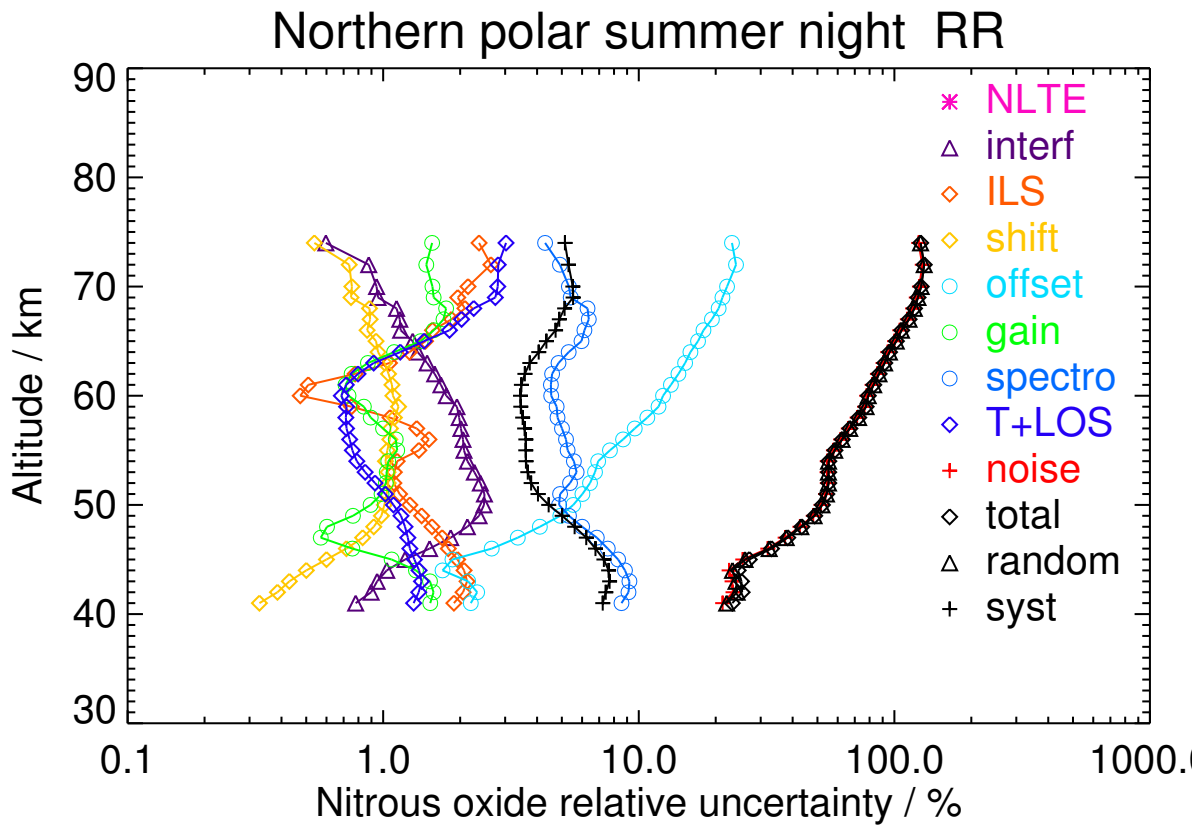

**Figure S244.** V8R\_N2O\_662 Northern polar summer night

**Table S245.** Nitrous oxide error budget for Northern polar autumn day. All uncertainties are  $1\sigma$ .

| altitude (km) | mean target (ppbv) | NLTE (ppbv) | interf (ppbv) | ILS (ppbv) | shift (ppbv) | offset (ppbv) | gain (ppbv) | spectro (ppbv) | T+LOS (ppbv) | noise (ppbv) | random (ppbv) | syst (ppbv) | total (ppbv) |
|---------------|--------------------|-------------|---------------|------------|--------------|---------------|-------------|----------------|--------------|--------------|---------------|-------------|--------------|
| 45            | 0.274              | <0.001      | 0.006         | 0.002      | 0.002        | 0.015         | 0.002       | 0.010          | 0.002        | 0.147        | 0.148         | 0.008       | 0.149        |
| 50            | 0.299              | <0.001      | 0.008         | 0.004      | 0.004        | 0.029         | 0.003       | 0.015          | 0.002        | 0.196        | 0.198         | 0.012       | 0.199        |
| 55            | 0.339              | <0.001      | 0.009         | 0.004      | 0.006        | 0.055         | 0.003       | 0.016          | 0.002        | 0.317        | 0.322         | 0.014       | 0.322        |
| 60            | 0.480              | <0.001      | 0.011         | 0.004      | 0.007        | 0.103         | 0.003       | 0.020          | 0.003        | 0.559        | 0.569         | 0.018       | 0.569        |
| 65            | 1.148              | <0.001      | 0.019         | 0.005      | 0.014        | 0.309         | 0.008       | 0.047          | 0.008        | 1.640        | 1.669         | 0.043       | 1.670        |
| 70            | 1.520              | <0.001      | 0.018         | 0.002      | 0.014        | 0.426         | 0.011       | 0.052          | 0.011        | 2.179        | 2.220         | 0.053       | 2.221        |

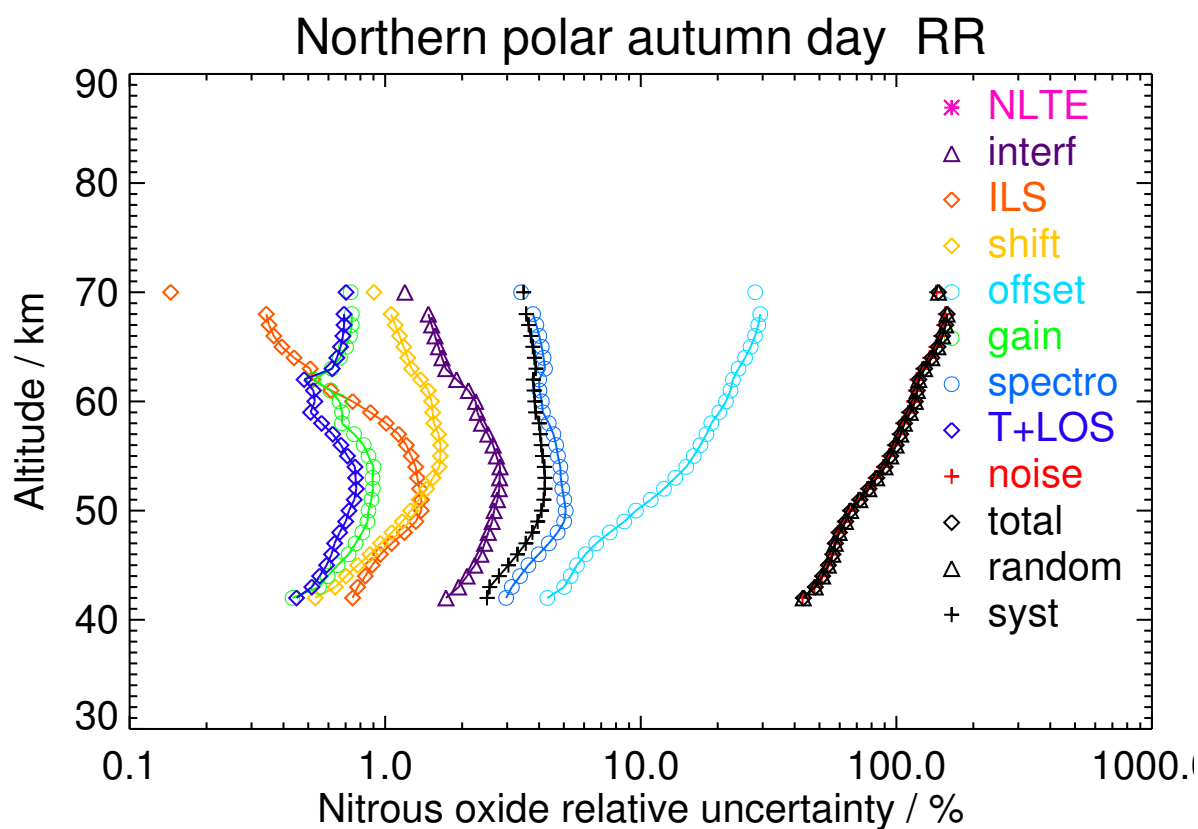

**Figure S245.** V8R\_N2O\_662 Northern polar autumn day

**Table S246.** Nitrous oxide error budget for Northern polar autumn night. All uncertainties are  $1\sigma$ .

| altitude (km) | mean target (ppbv) | NLTE (ppbv) | interf (ppbv) | ILS (ppbv) | shift (ppbv) | offset (ppbv) | gain (ppbv) | spectro (ppbv) | T+LOS (ppbv) | noise (ppbv) | random (ppbv) | syst (ppbv) | total (ppbv) |
|---------------|--------------------|-------------|---------------|------------|--------------|---------------|-------------|----------------|--------------|--------------|---------------|-------------|--------------|
| 45            | 0.854              | <0.001      | 0.010         | 0.038      | 0.005        | 0.022         | 0.032       | 0.125          | 0.007        | 0.266        | 0.295         | 0.052       | 0.299        |
| 50            | 0.644              | <0.001      | 0.011         | 0.011      | 0.005        | 0.037         | 0.007       | 0.043          | 0.004        | 0.316        | 0.321         | 0.030       | 0.322        |
| 55            | 0.576              | <0.001      | 0.010         | 0.008      | 0.006        | 0.064         | 0.004       | 0.028          | 0.003        | 0.419        | 0.425         | 0.025       | 0.425        |
| 60            | 0.850              | <0.001      | 0.010         | 0.009      | 0.007        | 0.126         | 0.008       | 0.038          | 0.004        | 0.759        | 0.769         | 0.034       | 0.770        |
| 65            | 1.294              | <0.001      | 0.012         | 0.012      | 0.008        | 0.253         | 0.016       | 0.055          | 0.010        | 1.477        | 1.499         | 0.049       | 1.500        |
| 70            | 3.669              | <0.001      | 0.025         | 0.041      | 0.009        | 0.810         | 0.060       | 0.184          | 0.046        | 4.796        | 4.866         | 0.155       | 4.868        |
| 74            | 4.125              | <0.001      | 0.022         | 0.028      | 0.007        | 0.955         | 0.051       | 0.146          | 0.054        | 4.925        | 5.017         | 0.157       | 5.020        |

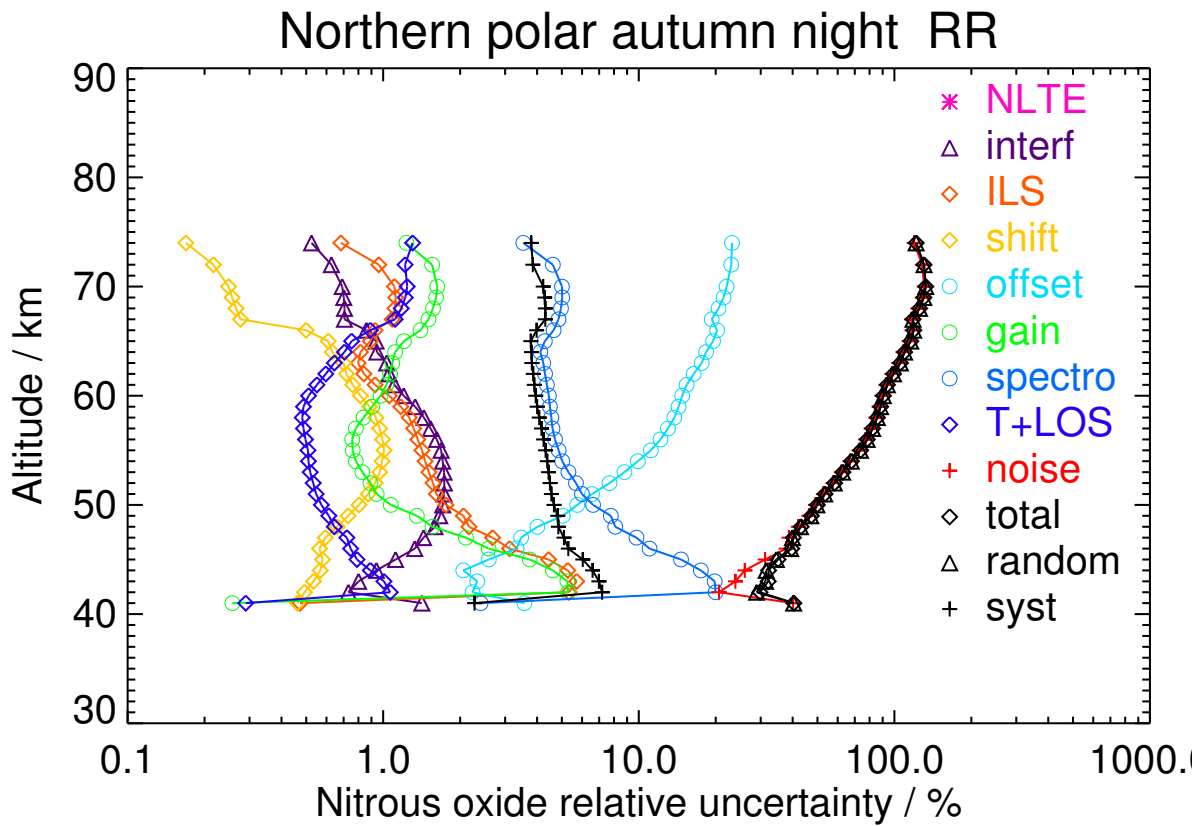

**Figure S246.** V8R\_N2O\_662 Northern polar autumn night

**Table S247.** Nitrous oxide error budget for Northern midlatitude winter day. All uncertainties are  $1\sigma$ .

| altitude (km) | mean target (ppbv) | NLTE (ppbv) | interf (ppbv) | ILS (ppbv) | shift (ppbv) | offset (ppbv) | gain (ppbv) | spectro (ppbv) | T+LOS (ppbv) | noise (ppbv) | random (ppbv) | syst (ppbv) | total (ppbv) |
|---------------|--------------------|-------------|---------------|------------|--------------|---------------|-------------|----------------|--------------|--------------|---------------|-------------|--------------|
| 40            | 9.945              | <0.001      | 0.032         | 0.174      | 0.015        | 0.134         | 0.266       | 0.591          | 0.105        | 0.831        | 0.892         | 0.613       | 1.083        |
| 45            | 3.548              | <0.001      | 0.015         | 0.094      | 0.012        | 0.039         | 0.089       | 0.365          | 0.045        | 0.435        | 0.481         | 0.335       | 0.586        |
| 50            | 0.743              | <0.001      | 0.009         | 0.021      | 0.004        | 0.033         | 0.013       | 0.089          | 0.009        | 0.277        | 0.286         | 0.066       | 0.294        |
| 55            | 0.408              | <0.001      | 0.007         | 0.006      | 0.004        | 0.047         | 0.003       | 0.032          | 0.004        | 0.305        | 0.310         | 0.025       | 0.311        |
| 60            | 0.543              | <0.001      | 0.009         | 0.012      | 0.006        | 0.101         | 0.002       | 0.030          | 0.004        | 0.588        | 0.597         | 0.026       | 0.598        |
| 65            | 1.536              | <0.001      | 0.029         | 0.077      | 0.009        | 0.410         | 0.017       | 0.067          | 0.021        | 2.254        | 2.291         | 0.103       | 2.294        |
| 70            | 2.684              | 0.001       | 0.054         | 0.189      | 0.009        | 0.828         | 0.044       | 0.107          | 0.043        | 4.234        | 4.315         | 0.222       | 4.320        |

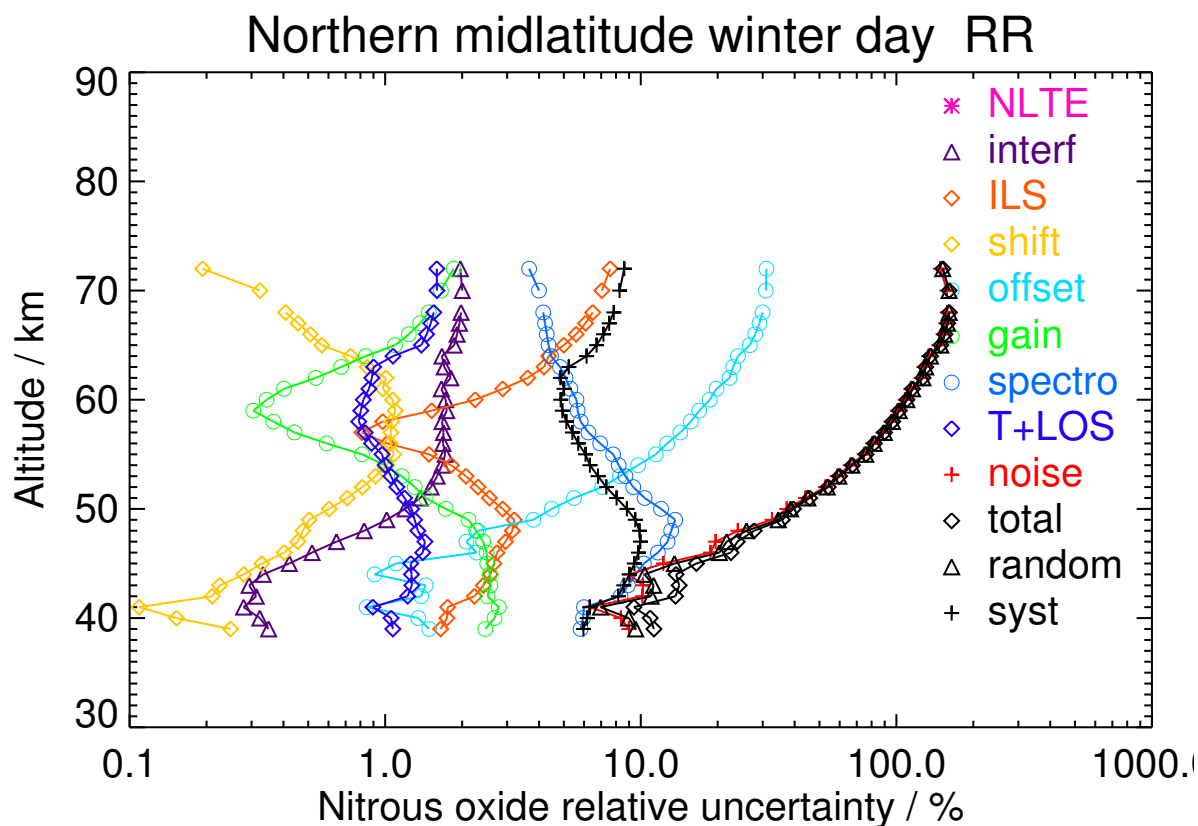

**Figure S247.** V8R\_N2O\_662 Northern midlatitude winter day

**Table S248.** Nitrous oxide error budget for Northern midlatitude winter night. All uncertainties are  $1\sigma$ .

| altitude (km) | mean target (ppbv) | NLTE (ppbv) | interf (ppbv) | ILS (ppbv) | shift (ppbv) | offset (ppbv) | gain (ppbv) | spectro (ppbv) | T+LOS (ppbv) | noise (ppbv) | random (ppbv) | syst (ppbv) | total (ppbv) |
|---------------|--------------------|-------------|---------------|------------|--------------|---------------|-------------|----------------|--------------|--------------|---------------|-------------|--------------|
| 40            | 8.913              | <0.001      | 0.032         | 0.195      | 0.017        | 0.155         | 0.241       | 0.799          | 0.107        | 1.020        | 1.110         | 0.761       | 1.346        |
| 45            | 3.619              | <0.001      | 0.014         | 0.110      | 0.012        | 0.050         | 0.121       | 0.411          | 0.039        | 0.470        | 0.557         | 0.333       | 0.648        |
| 50            | 0.936              | <0.001      | 0.010         | 0.035      | 0.005        | 0.039         | 0.022       | 0.140          | 0.013        | 0.324        | 0.345         | 0.094       | 0.358        |
| 55            | 0.470              | <0.001      | 0.009         | 0.008      | 0.005        | 0.060         | 0.003       | 0.037          | 0.005        | 0.380        | 0.386         | 0.030       | 0.387        |
| 60            | 0.750              | <0.001      | 0.012         | 0.008      | 0.008        | 0.138         | 0.006       | 0.034          | 0.005        | 0.771        | 0.784         | 0.028       | 0.784        |
| 65            | 1.807              | <0.001      | 0.019         | 0.018      | 0.012        | 0.418         | 0.025       | 0.092          | 0.023        | 2.256        | 2.295         | 0.074       | 2.296        |
| 70            | 2.620              | <0.001      | 0.028         | 0.030      | 0.016        | 0.813         | 0.033       | 0.125          | 0.037        | 4.102        | 4.183         | 0.099       | 4.184        |
| 74            | 3.498              | <0.001      | 0.028         | 0.024      | 0.015        | 1.084         | 0.034       | 0.127          | 0.047        | 4.961        | 5.079         | 0.113       | 5.080        |

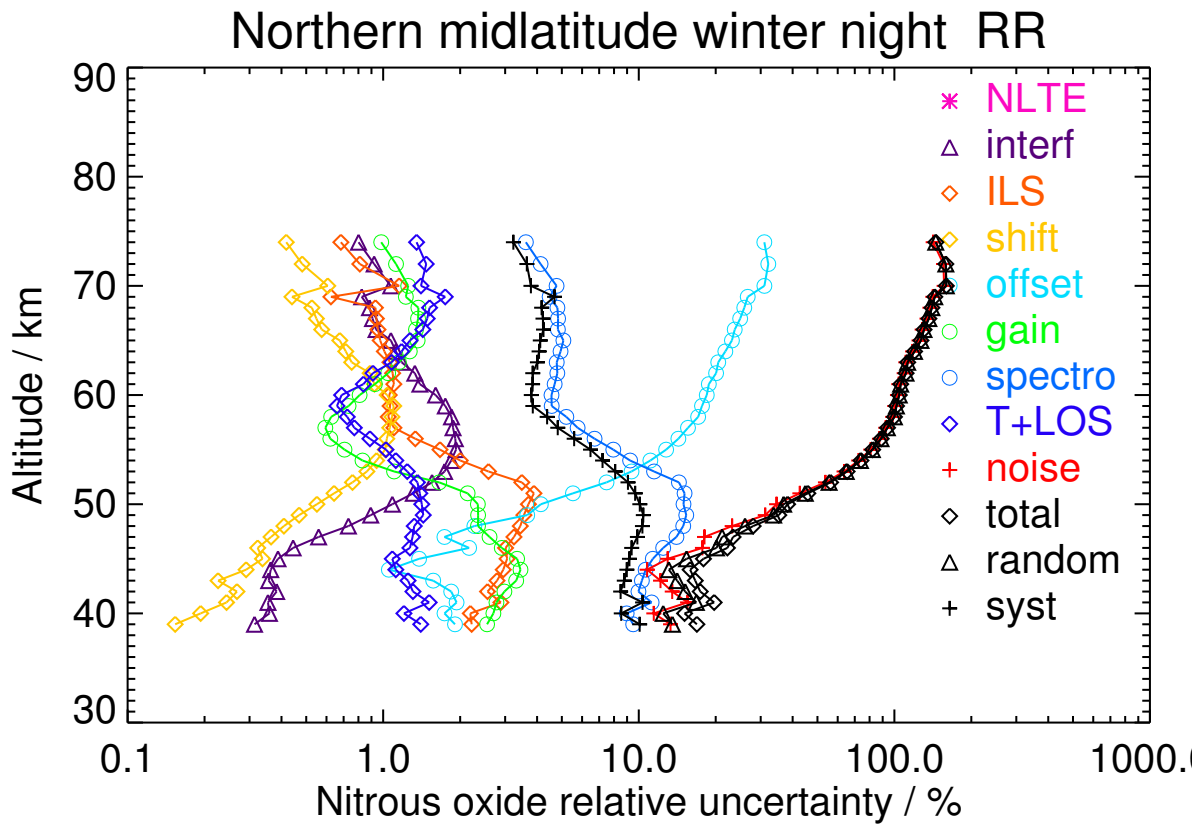

**Figure S248.** V8R\_N2O\_662 Northern midlatitude winter night

**Table S249.** Nitrous oxide error budget for Northern midlatitude spring day. All uncertainties are  $1\sigma$ .

| altitude (km) | mean target (ppbv) | NLTE (ppbv) | interf (ppbv) | ILS (ppbv) | shift (ppbv) | offset (ppbv) | gain (ppbv) | spectro (ppbv) | T+LOS (ppbv) | noise (ppbv) | random (ppbv) | syst (ppbv) | total (ppbv) |
|---------------|--------------------|-------------|---------------|------------|--------------|---------------|-------------|----------------|--------------|--------------|---------------|-------------|--------------|
| 45            | 2.994              | <0.001      | 0.011         | 0.098      | 0.014        | 0.034         | 0.105       | 0.324          | 0.025        | 0.297        | 0.408         | 0.224       | 0.465        |
| 50            | 1.380              | <0.001      | 0.011         | 0.033      | 0.005        | 0.024         | 0.027       | 0.123          | 0.011        | 0.300        | 0.317         | 0.087       | 0.329        |
| 55            | 0.596              | <0.001      | 0.009         | 0.011      | 0.005        | 0.044         | 0.006       | 0.048          | 0.006        | 0.336        | 0.341         | 0.036       | 0.343        |
| 60            | 0.525              | <0.001      | 0.008         | 0.004      | 0.006        | 0.078         | 0.003       | 0.028          | 0.004        | 0.495        | 0.502         | 0.023       | 0.502        |
| 65            | 0.907              | <0.001      | 0.013         | 0.025      | 0.010        | 0.203         | 0.006       | 0.035          | 0.007        | 1.153        | 1.171         | 0.037       | 1.172        |
| 70            | 1.425              | <0.001      | 0.026         | 0.043      | 0.022        | 0.451         | 0.008       | 0.046          | 0.014        | 2.319        | 2.363         | 0.063       | 2.364        |

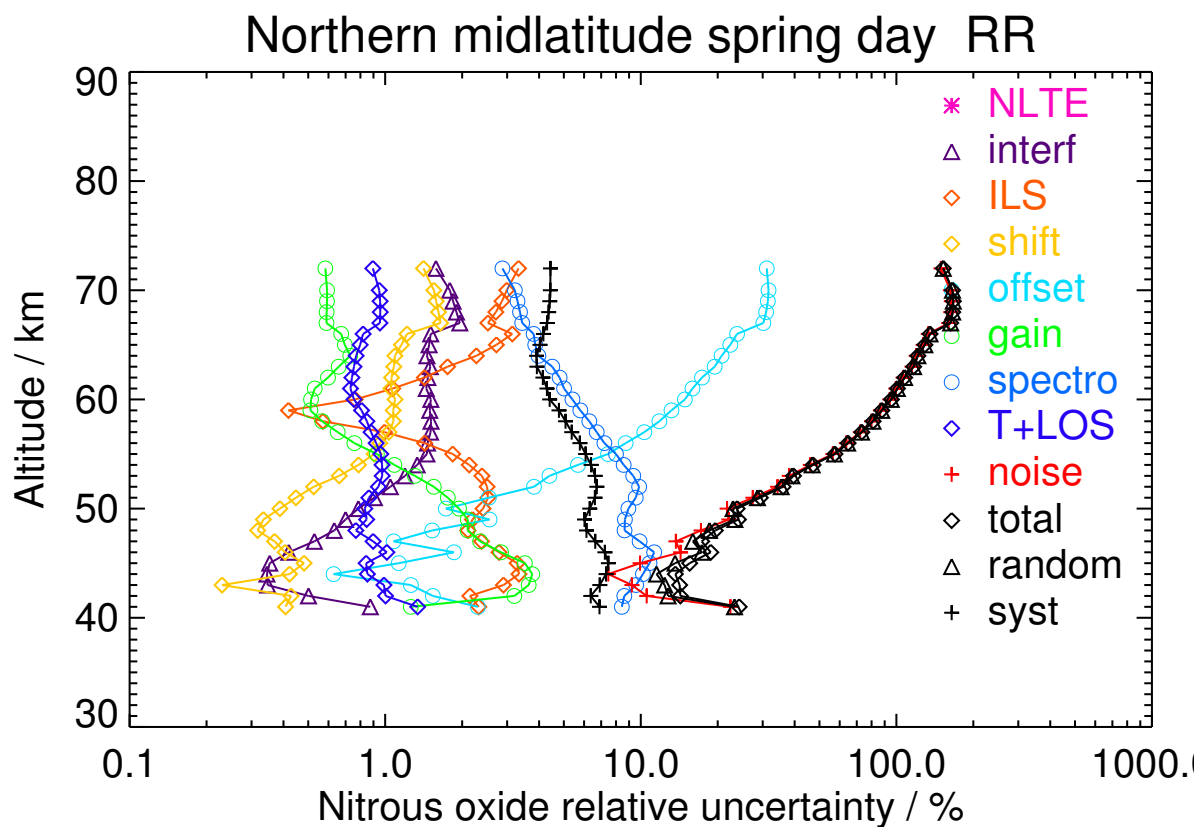

**Figure S249.** V8R\_N2O\_662 Northern midlatitude spring day



**Table S250.** Nitrous oxide error budget for Northern midlatitude spring night. All uncertainties are  $1\sigma$ .

| altitude (km) | mean target (ppbv) | NLTE (ppbv) | interf (ppbv) | ILS (ppbv) | shift (ppbv) | offset (ppbv) | gain (ppbv) | spectro (ppbv) | T+LOS (ppbv) | noise (ppbv) | random (ppbv) | syst (ppbv) | total (ppbv) |
|---------------|--------------------|-------------|---------------|------------|--------------|---------------|-------------|----------------|--------------|--------------|---------------|-------------|--------------|
| 40            | 12.832             | <0.001      | 0.039         | 0.264      | 0.014        | 0.145         | 0.372       | 0.970          | 0.141        | 0.883        | 0.909         | 1.070       | 1.404        |
| 45            | 3.535              | <0.001      | 0.011         | 0.093      | 0.014        | 0.034         | 0.096       | 0.298          | 0.027        | 0.312        | 0.386         | 0.239       | 0.454        |
| 50            | 2.021              | <0.001      | 0.013         | 0.039      | 0.006        | 0.029         | 0.034       | 0.150          | 0.014        | 0.368        | 0.385         | 0.116       | 0.402        |
| 55            | 1.027              | <0.001      | 0.011         | 0.016      | 0.006        | 0.051         | 0.010       | 0.070          | 0.009        | 0.457        | 0.462         | 0.060       | 0.465        |
| 60            | 0.677              | <0.001      | 0.008         | 0.004      | 0.006        | 0.079         | 0.005       | 0.039          | 0.006        | 0.535        | 0.541         | 0.033       | 0.542        |
| 65            | 1.701              | <0.001      | 0.019         | 0.068      | 0.014        | 0.306         | 0.015       | 0.076          | 0.022        | 1.914        | 1.940         | 0.085       | 1.942        |
| 70            | 3.226              | <0.001      | 0.043         | 0.325      | 0.039        | 0.790         | 0.026       | 0.132          | 0.062        | 4.411        | 4.489         | 0.254       | 4.496        |
| 74            | 7.133              | 0.002       | 0.100         | 0.806      | 0.096        | 2.003         | 0.050       | 0.243          | 0.166        | 9.785        | 9.990         | 0.843       | 10.026       |

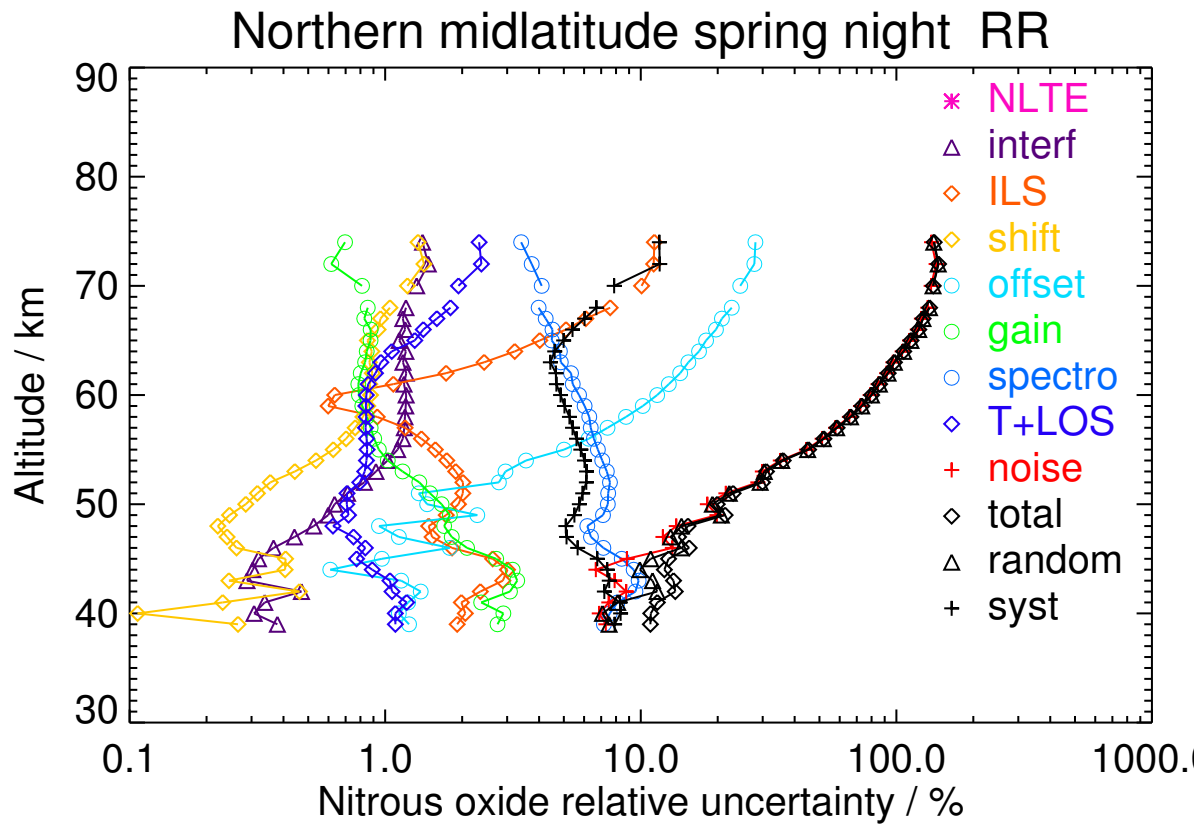

**Figure S250.** V8R\_N2O\_662 Northern midlatitude spring night

**Table S251.** Nitrous oxide error budget for Northern midlatitude summer day. All uncertainties are  $1\sigma$ .

| altitude (km) | mean target (ppbv) | NLTE (ppbv) | interf (ppbv) | ILS (ppbv) | shift (ppbv) | offset (ppbv) | gain (ppbv) | spectro (ppbv) | T+LOS (ppbv) | noise (ppbv) | random (ppbv) | syst (ppbv) | total (ppbv) |
|---------------|--------------------|-------------|---------------|------------|--------------|---------------|-------------|----------------|--------------|--------------|---------------|-------------|--------------|
| 45            | 2.181              | <0.001      | 0.009         | 0.057      | 0.009        | 0.024         | 0.056       | 0.211          | 0.019        | 0.253        | 0.303         | 0.157       | 0.341        |
| 50            | 1.024              | <0.001      | 0.010         | 0.020      | 0.004        | 0.019         | 0.015       | 0.074          | 0.007        | 0.268        | 0.275         | 0.053       | 0.280        |
| 55            | 1.185              | <0.001      | 0.013         | 0.016      | 0.006        | 0.046         | 0.013       | 0.064          | 0.007        | 0.449        | 0.454         | 0.048       | 0.456        |
| 60            | 1.031              | <0.001      | 0.011         | 0.009      | 0.009        | 0.103         | 0.008       | 0.059          | 0.008        | 0.715        | 0.724         | 0.046       | 0.725        |
| 65            | 1.553              | <0.001      | 0.018         | 0.075      | 0.015        | 0.266         | 0.010       | 0.072          | 0.018        | 1.684        | 1.706         | 0.088       | 1.709        |

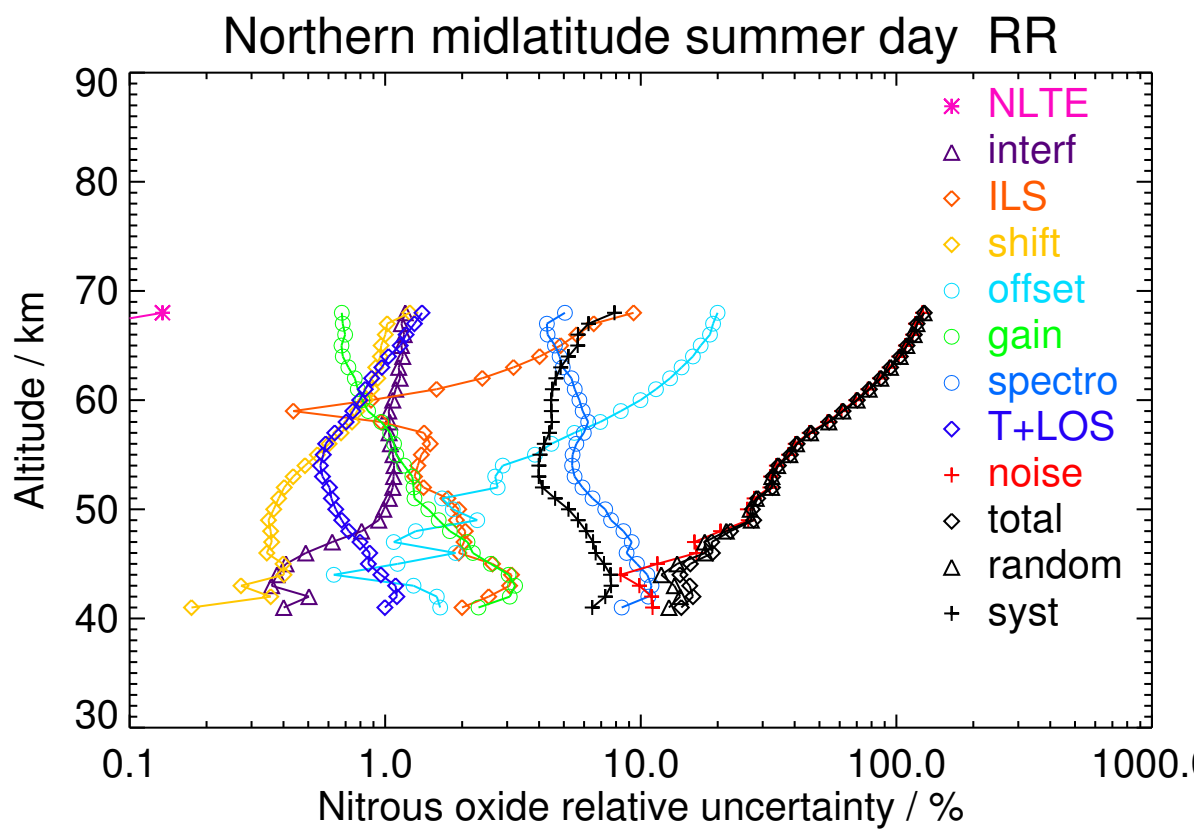

**Figure S251.** V8R\_N2O\_662 Northern midlatitude summer day

**Table S252.** Nitrous oxide error budget for Northern midlatitude summer night. All uncertainties are  $1\sigma$ .

| altitude (km) | mean target (ppbv) | NLTE (ppbv) | interf (ppbv) | ILS (ppbv) | shift (ppbv) | offset (ppbv) | gain (ppbv) | spectro (ppbv) | T+LOS (ppbv) | noise (ppbv) | random (ppbv) | syst (ppbv) | total (ppbv) |
|---------------|--------------------|-------------|---------------|------------|--------------|---------------|-------------|----------------|--------------|--------------|---------------|-------------|--------------|
| 45            | 2.045              | <0.001      | 0.008         | 0.040      | 0.005        | 0.025         | 0.057       | 0.143          | 0.014        | 0.228        | 0.256         | 0.113       | 0.280        |
| 50            | 1.694              | <0.001      | 0.012         | 0.035      | 0.005        | 0.021         | 0.035       | 0.154          | 0.012        | 0.330        | 0.360         | 0.078       | 0.369        |
| 55            | 1.826              | <0.001      | 0.015         | 0.027      | 0.006        | 0.052         | 0.024       | 0.110          | 0.013        | 0.583        | 0.593         | 0.070       | 0.597        |
| 60            | 1.779              | <0.001      | 0.013         | 0.011      | 0.010        | 0.128         | 0.018       | 0.099          | 0.016        | 0.958        | 0.969         | 0.076       | 0.972        |
| 65            | 1.968              | <0.001      | 0.018         | 0.077      | 0.015        | 0.286         | 0.019       | 0.092          | 0.026        | 1.887        | 1.910         | 0.104       | 1.913        |
| 70            | 3.698              | <0.001      | 0.036         | 0.227      | 0.038        | 0.757         | 0.052       | 0.196          | 0.082        | 4.675        | 4.741         | 0.233       | 4.746        |

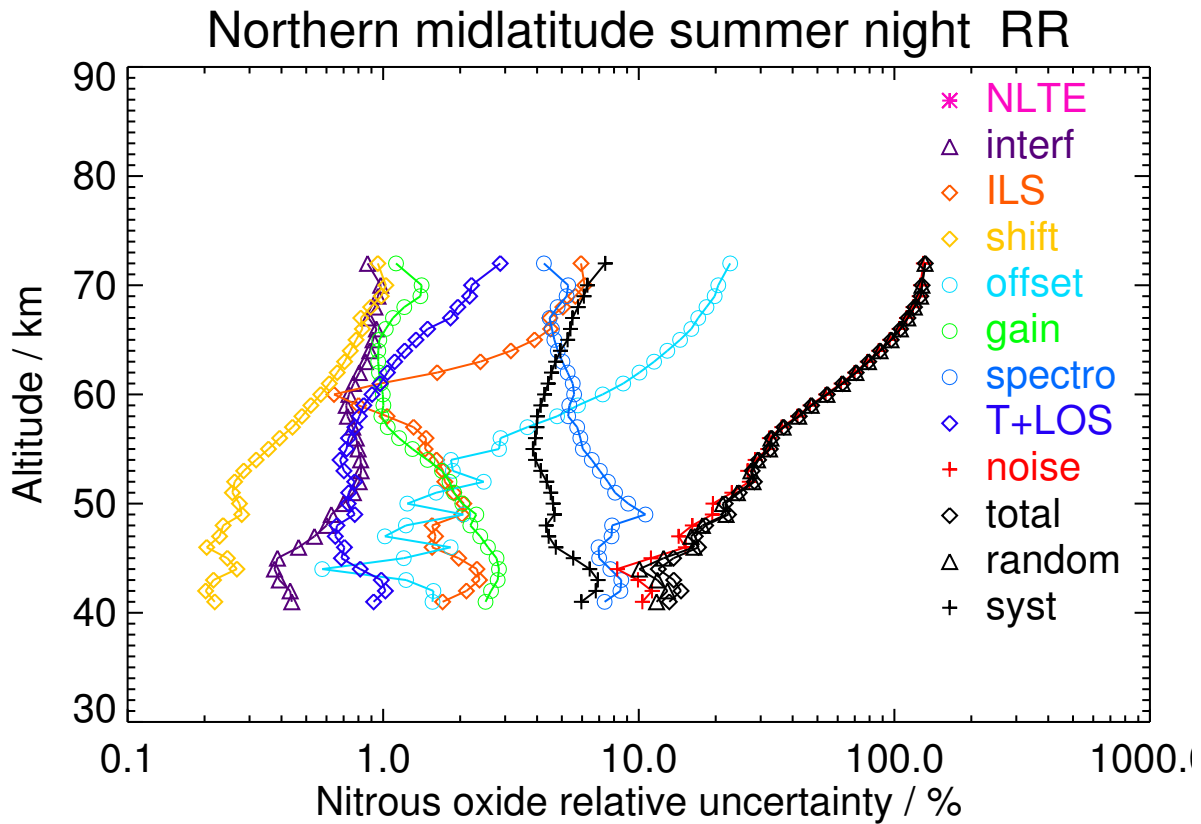

**Figure S252.** V8R\_N2O\_662 Northern midlatitude summer night

**Table S253.** Nitrous oxide error budget for Northern midlatitude autumn day. All uncertainties are  $1\sigma$ .

| altitude (km) | mean target (ppbv) | NLTE (ppbv) | interf (ppbv) | ILS (ppbv) | shift (ppbv) | offset (ppbv) | gain (ppbv) | spectro (ppbv) | T+LOS (ppbv) | noise (ppbv) | random (ppbv) | syst (ppbv) | total (ppbv) |
|---------------|--------------------|-------------|---------------|------------|--------------|---------------|-------------|----------------|--------------|--------------|---------------|-------------|--------------|
| 45            | 5.654              | <0.001      | 0.016         | 0.126      | 0.017        | 0.061         | 0.155       | 0.432          | 0.042        | 0.524        | 0.601         | 0.381       | 0.712        |
| 50            | 2.978              | <0.001      | 0.016         | 0.056      | 0.007        | 0.038         | 0.050       | 0.218          | 0.027        | 0.559        | 0.574         | 0.194       | 0.606        |
| 55            | 1.477              | <0.001      | 0.014         | 0.025      | 0.008        | 0.075         | 0.016       | 0.104          | 0.014        | 0.668        | 0.675         | 0.091       | 0.681        |
| 60            | 1.222              | <0.001      | 0.012         | 0.009      | 0.009        | 0.135         | 0.011       | 0.065          | 0.011        | 0.914        | 0.925         | 0.055       | 0.927        |
| 65            | 2.797              | <0.001      | 0.028         | 0.110      | 0.021        | 0.498         | 0.024       | 0.139          | 0.049        | 3.030        | 3.073         | 0.147       | 3.076        |
| 70            | 3.672              | <0.001      | 0.038         | 0.189      | 0.029        | 0.886         | 0.028       | 0.166          | 0.077        | 5.009        | 5.089         | 0.215       | 5.094        |

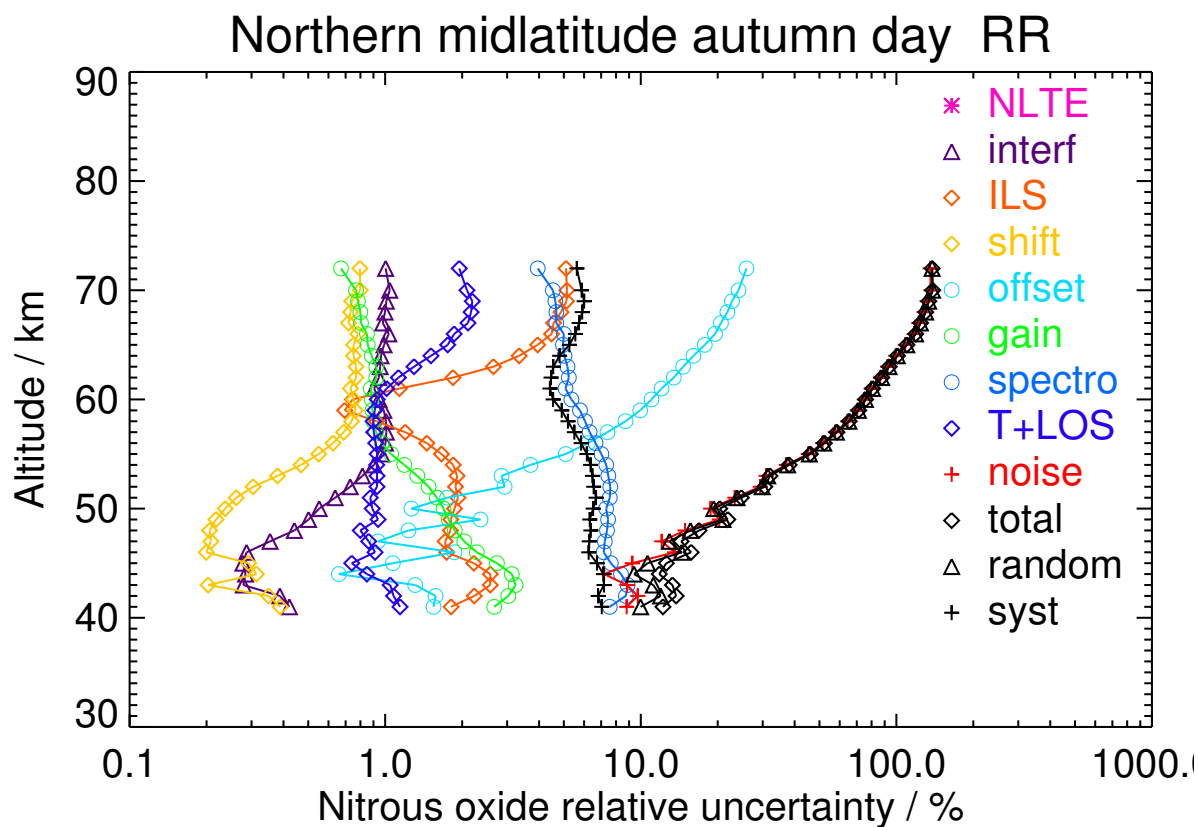

**Figure S253.** V8R\_N2O\_662 Northern midlatitude autumn day

**Table S254.** Nitrous oxide error budget for Northern midlatitude autumn night. All uncertainties are  $1\sigma$ .

| altitude (km) | mean target (ppbv) | NLTE (ppbv) | interf (ppbv) | ILS (ppbv) | shift (ppbv) | offset (ppbv) | gain (ppbv) | spectro (ppbv) | T+LOS (ppbv) | noise (ppbv) | random (ppbv) | syst (ppbv) | total (ppbv) |
|---------------|--------------------|-------------|---------------|------------|--------------|---------------|-------------|----------------|--------------|--------------|---------------|-------------|--------------|
| 45            | 4.921              | <0.001      | 0.018         | 0.184      | 0.036        | 0.054         | 0.208       | 0.586          | 0.047        | 0.486        | 0.689         | 0.434       | 0.815        |
| 50            | 1.730              | <0.001      | 0.013         | 0.042      | 0.006        | 0.037         | 0.032       | 0.159          | 0.016        | 0.426        | 0.442         | 0.126       | 0.460        |
| 55            | 1.092              | <0.001      | 0.013         | 0.017      | 0.007        | 0.067         | 0.011       | 0.070          | 0.008        | 0.549        | 0.555         | 0.060       | 0.558        |
| 60            | 1.037              | <0.001      | 0.012         | 0.006      | 0.008        | 0.124         | 0.009       | 0.053          | 0.008        | 0.833        | 0.843         | 0.044       | 0.844        |
| 65            | 2.514              | <0.001      | 0.017         | 0.038      | 0.012        | 0.340         | 0.049       | 0.163          | 0.039        | 2.183        | 2.215         | 0.095       | 2.217        |
| 70            | 4.474              | <0.001      | 0.023         | 0.024      | 0.014        | 0.807         | 0.051       | 0.176          | 0.084        | 5.033        | 5.099         | 0.167       | 5.101        |
| 74            | 3.949              | <0.001      | 0.016         | 0.017      | 0.003        | 0.788         | 0.026       | 0.110          | 0.074        | 4.294        | 4.366         | 0.114       | 4.368        |

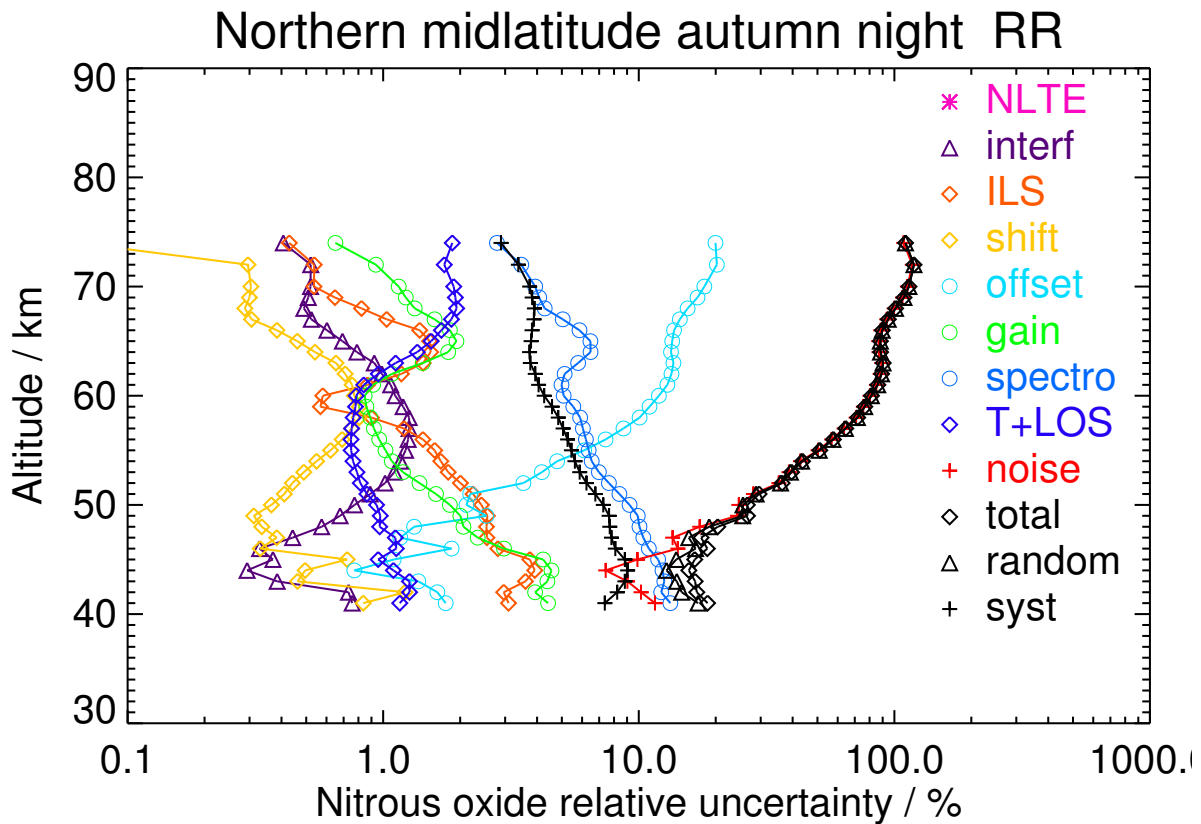

**Figure S254.** V8R\_N2O\_662 Northern midlatitude autumn night

**Table S255.** Nitrous oxide error budget for Tropics day. All uncertainties are  $1\sigma$ .

| altitude (km) | mean target (ppbv) | NLTE (ppbv) | interf (ppbv) | ILS (ppbv) | shift (ppbv) | offset (ppbv) | gain (ppbv) | spectro (ppbv) | T+LOS (ppbv) | noise (ppbv) | random (ppbv) | syst (ppbv) | total (ppbv) |
|---------------|--------------------|-------------|---------------|------------|--------------|---------------|-------------|----------------|--------------|--------------|---------------|-------------|--------------|
| 40            | 24.915             | 0.001       | 0.189         | 0.634      | 0.545        | 0.306         | 0.824       | 2.705          | 0.324        | 1.831        | 2.721         | 2.210       | 3.505        |
| 45            | 7.792              | <0.001      | 0.027         | 0.213      | 0.059        | 0.092         | 0.217       | 0.669          | 0.080        | 0.630        | 0.735         | 0.645       | 0.978        |
| 50            | 2.183              | <0.001      | 0.014         | 0.050      | 0.009        | 0.039         | 0.035       | 0.201          | 0.025        | 0.432        | 0.443         | 0.190       | 0.483        |
| 55            | 0.560              | <0.001      | 0.008         | 0.008      | 0.005        | 0.042         | 0.003       | 0.043          | 0.007        | 0.325        | 0.328         | 0.040       | 0.330        |
| 60            | 0.530              | <0.001      | 0.008         | 0.011      | 0.006        | 0.076         | 0.003       | 0.029          | 0.005        | 0.494        | 0.499         | 0.029       | 0.500        |
| 65            | 1.153              | <0.001      | 0.019         | 0.071      | 0.013        | 0.244         | 0.007       | 0.073          | 0.020        | 1.433        | 1.456         | 0.079       | 1.458        |
| 70            | 6.742              | 0.002       | 0.113         | 0.558      | 0.063        | 1.994         | 0.028       | 0.410          | 0.273        | 10.720       | 10.908        | 0.692       | 10.930       |
| 74            | 10.259             | 0.004       | 0.163         | 0.952      | 0.070        | 3.433         | 0.047       | 0.565          | 0.446        | 16.550       | 16.909        | 1.108       | 16.945       |

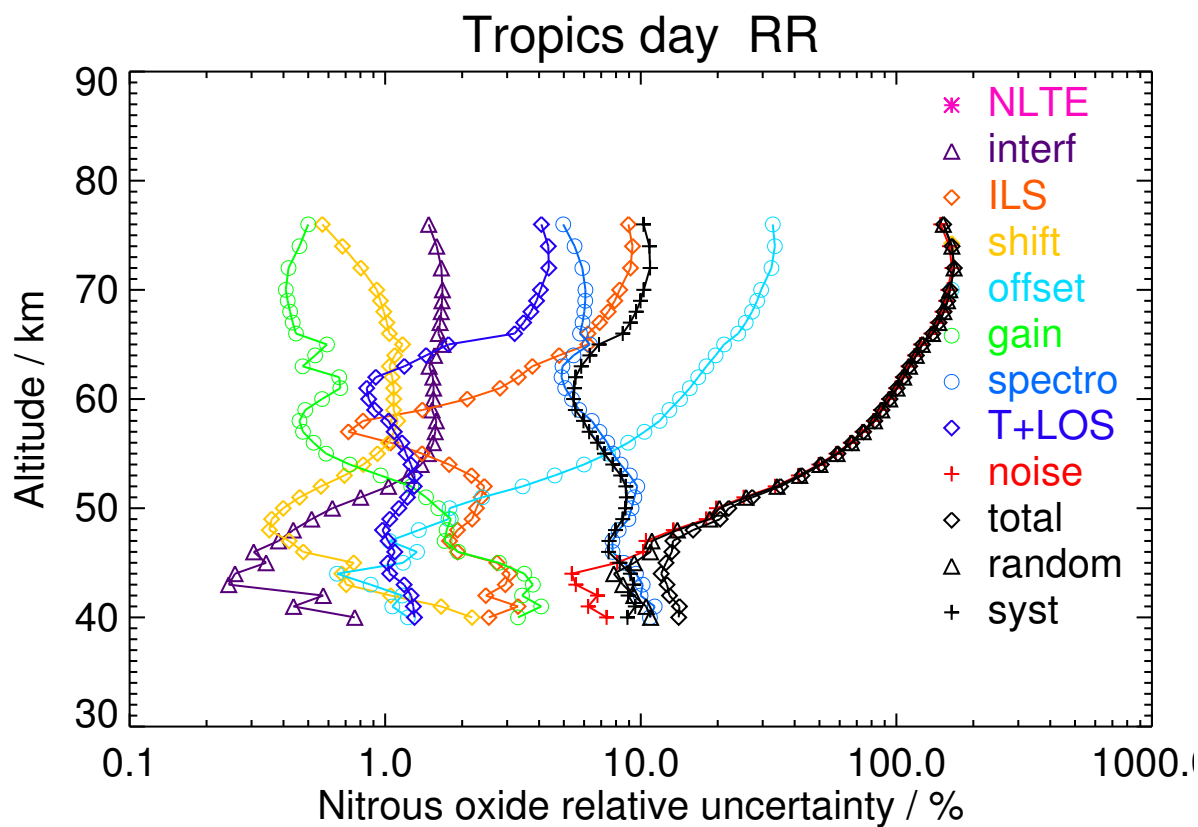

**Figure S255.** V8R\_N2O\_662 Tropics day

**Table S256.** Nitrous oxide error budget for Tropics night. All uncertainties are  $1\sigma$ .

| altitude (km) | mean target (ppbv) | NLTE (ppbv) | interf (ppbv) | ILS (ppbv) | shift (ppbv) | offset (ppbv) | gain (ppbv) | spectro (ppbv) | T+LOS (ppbv) | noise (ppbv) | random (ppbv) | syst (ppbv) | total (ppbv) |
|---------------|--------------------|-------------|---------------|------------|--------------|---------------|-------------|----------------|--------------|--------------|---------------|-------------|--------------|
| 45            | 8.181              | <0.001      | 0.033         | 0.264      | 0.066        | 0.078         | 0.255       | 0.690          | 0.082        | 0.615        | 0.707         | 0.713       | 1.004        |
| 50            | 2.491              | <0.001      | 0.013         | 0.065      | 0.010        | 0.043         | 0.046       | 0.238          | 0.026        | 0.432        | 0.454         | 0.216       | 0.502        |
| 55            | 0.687              | <0.001      | 0.009         | 0.014      | 0.005        | 0.043         | 0.006       | 0.058          | 0.008        | 0.359        | 0.363         | 0.051       | 0.366        |
| 60            | 0.692              | <0.001      | 0.008         | 0.008      | 0.007        | 0.077         | 0.005       | 0.040          | 0.006        | 0.534        | 0.540         | 0.030       | 0.541        |
| 65            | 2.761              | <0.001      | 0.031         | 0.137      | 0.015        | 0.403         | 0.015       | 0.141          | 0.045        | 2.582        | 2.616         | 0.156       | 2.621        |
| 70            | 3.612              | 0.001       | 0.048         | 0.322      | 0.018        | 0.717         | 0.051       | 0.147          | 0.079        | 4.286        | 4.349         | 0.329       | 4.362        |

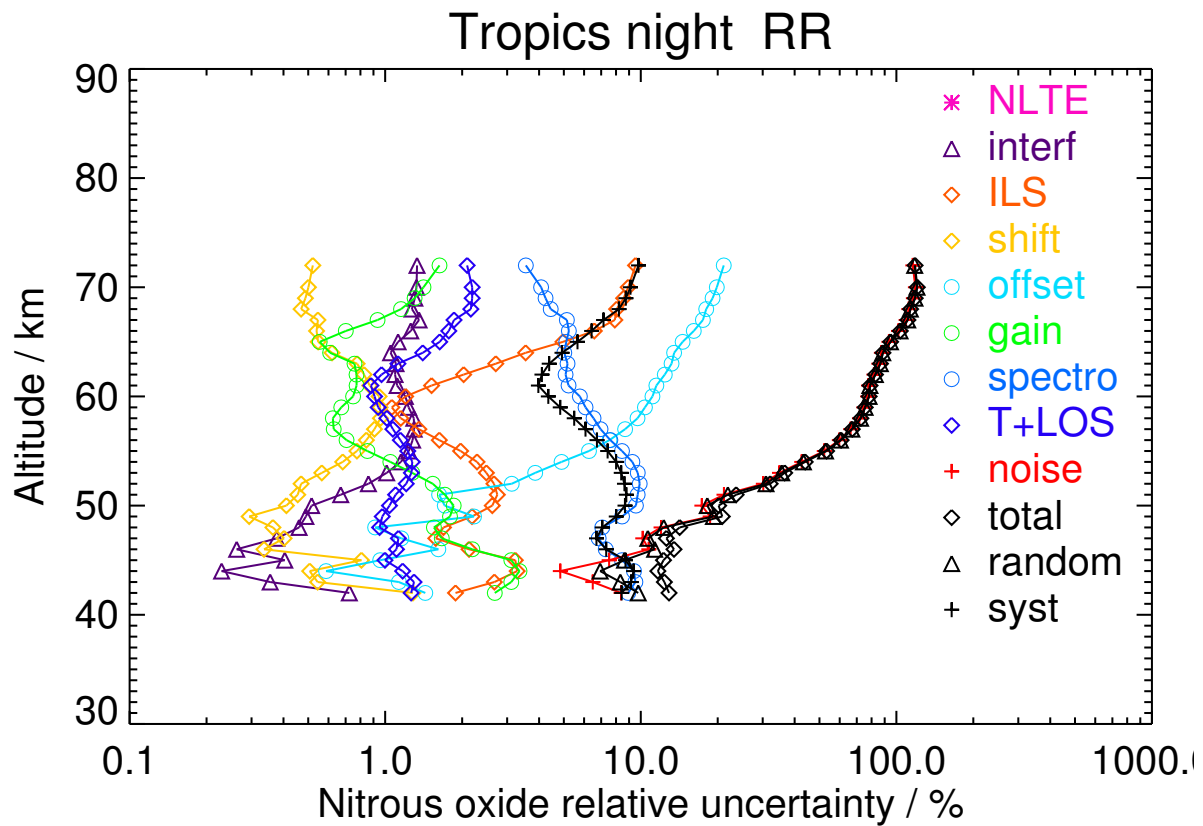

**Figure S256.** V8R\_N2O\_662 Tropics night

**Table S257.** Nitrous oxide error budget for Southern midlatitude winter day. All uncertainties are  $1\sigma$ .

| altitude (km) | mean target (ppbv) | NLTE (ppbv) | interf (ppbv) | ILS (ppbv) | shift (ppbv) | offset (ppbv) | gain (ppbv) | spectro (ppbv) | T+LOS (ppbv) | noise (ppbv) | random (ppbv) | syst (ppbv) | total (ppbv) |
|---------------|--------------------|-------------|---------------|------------|--------------|---------------|-------------|----------------|--------------|--------------|---------------|-------------|--------------|
| 45            | 1.038              | <0.001      | 0.010         | 0.026      | 0.004        | 0.015         | 0.021       | 0.093          | 0.009        | 0.239        | 0.252         | 0.060       | 0.259        |
| 50            | 1.060              | <0.001      | 0.012         | 0.017      | 0.006        | 0.035         | 0.012       | 0.070          | 0.006        | 0.366        | 0.371         | 0.051       | 0.375        |
| 55            | 0.695              | <0.001      | 0.010         | 0.008      | 0.006        | 0.066         | 0.005       | 0.037          | 0.005        | 0.468        | 0.473         | 0.033       | 0.474        |
| 60            | 0.827              | <0.001      | 0.010         | 0.006      | 0.008        | 0.131         | 0.007       | 0.038          | 0.006        | 0.825        | 0.835         | 0.033       | 0.836        |
| 65            | 1.894              | <0.001      | 0.020         | 0.024      | 0.017        | 0.436         | 0.031       | 0.103          | 0.025        | 2.486        | 2.525         | 0.083       | 2.526        |
| 70            | 4.604              | 0.001       | 0.046         | 0.088      | 0.036        | 1.369         | 0.065       | 0.217          | 0.082        | 7.377        | 7.504         | 0.224       | 7.507        |

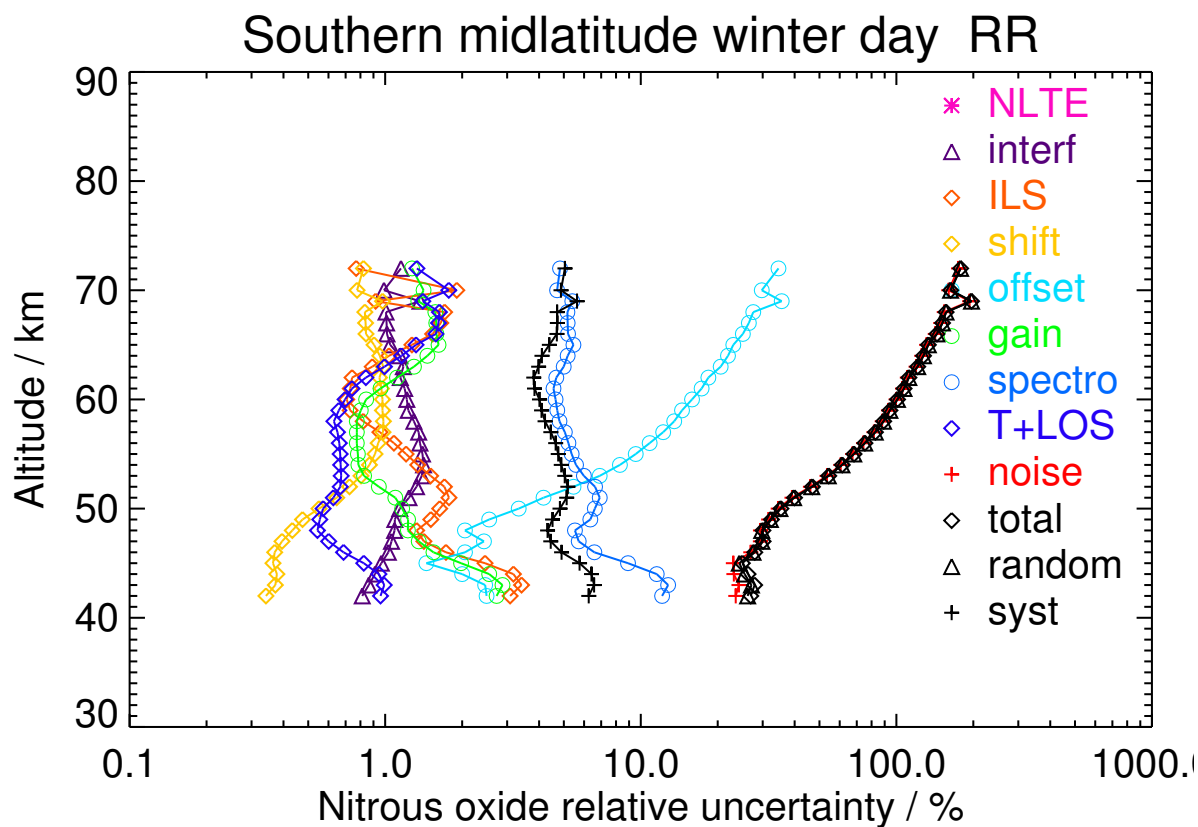

**Figure S257.** V8R\_N2O\_662 Southern midlatitude winter day



**Table S258.** Nitrous oxide error budget for Southern midlatitude winter night. All uncertainties are  $1\sigma$ .

| altitude (km) | mean target (ppbv) | NLTE (ppbv) | interf (ppbv) | ILS (ppbv) | shift (ppbv) | offset (ppbv) | gain (ppbv) | spectro (ppbv) | T+LOS (ppbv) | noise (ppbv) | random (ppbv) | syst (ppbv) | total (ppbv) |
|---------------|--------------------|-------------|---------------|------------|--------------|---------------|-------------|----------------|--------------|--------------|---------------|-------------|--------------|
| 45            | 1.349              | <0.001      | 0.011         | 0.023      | 0.004        | 0.017         | 0.023       | 0.087          | 0.009        | 0.264        | 0.272         | 0.070       | 0.281        |
| 50            | 1.192              | <0.001      | 0.012         | 0.022      | 0.006        | 0.035         | 0.016       | 0.085          | 0.008        | 0.399        | 0.406         | 0.064       | 0.411        |
| 55            | 0.929              | <0.001      | 0.010         | 0.014      | 0.006        | 0.067         | 0.012       | 0.057          | 0.007        | 0.518        | 0.524         | 0.045       | 0.526        |
| 60            | 1.232              | <0.001      | 0.011         | 0.011      | 0.009        | 0.157         | 0.013       | 0.062          | 0.011        | 1.015        | 1.028         | 0.051       | 1.029        |
| 65            | 2.218              | <0.001      | 0.017         | 0.057      | 0.016        | 0.415         | 0.029       | 0.102          | 0.030        | 2.522        | 2.557         | 0.088       | 2.559        |
| 70            | 5.672              | <0.001      | 0.030         | 0.034      | 0.026        | 1.339         | 0.073       | 0.210          | 0.121        | 7.893        | 8.007         | 0.225       | 8.010        |
| 74            | 3.443              | <0.001      | 0.015         | 0.023      | 0.013        | 0.829         | 0.035       | 0.101          | 0.061        | 4.287        | 4.367         | 0.109       | 4.368        |

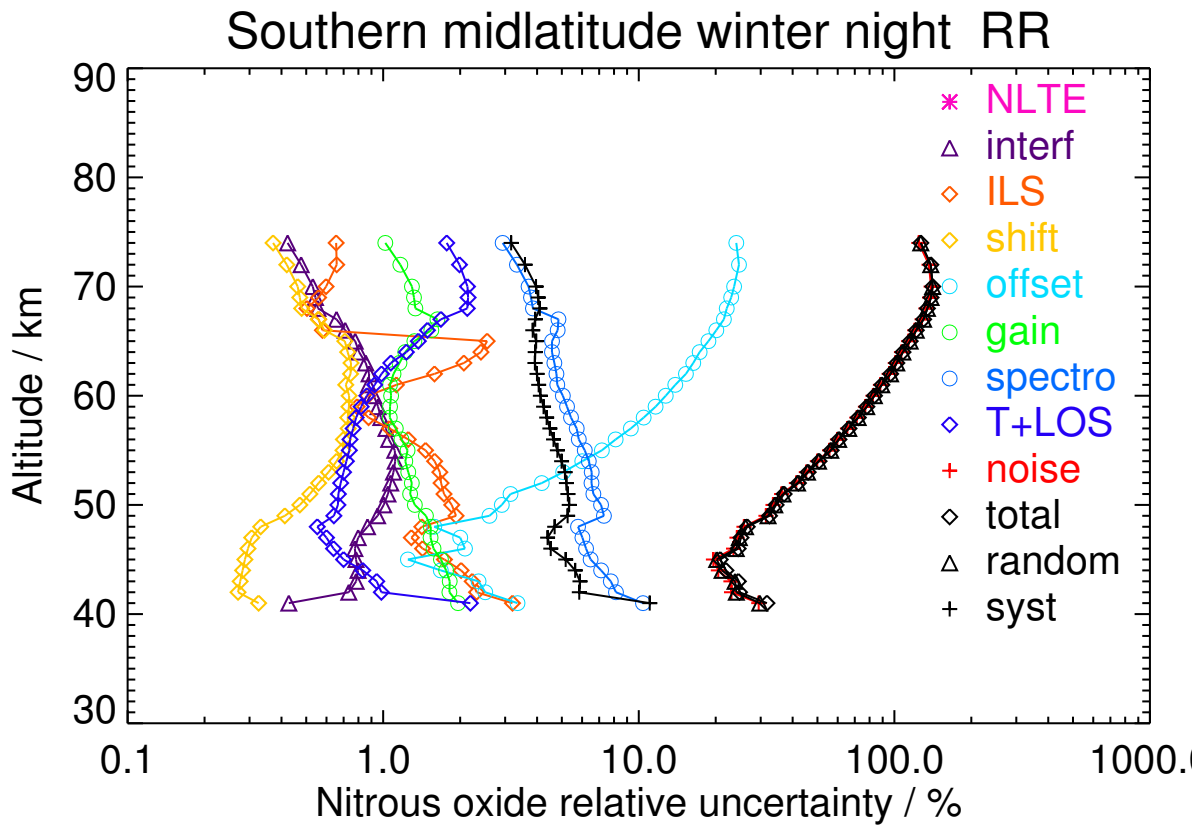

**Figure S258.** V8R\_N2O\_662 Southern midlatitude winter night

**Table S259.** Nitrous oxide error budget for Southern midlatitude spring day. All uncertainties are  $1\sigma$ .

| altitude (km) | mean target (ppbv) | NLTE (ppbv) | interf (ppbv) | ILS (ppbv) | shift (ppbv) | offset (ppbv) | gain (ppbv) | spectro (ppbv) | T+LOS (ppbv) | noise (ppbv) | random (ppbv) | syst (ppbv) | total (ppbv) |
|---------------|--------------------|-------------|---------------|------------|--------------|---------------|-------------|----------------|--------------|--------------|---------------|-------------|--------------|
| 45            | 2.688              | <0.001      | 0.011         | 0.049      | 0.006        | 0.019         | 0.051       | 0.168          | 0.019        | 0.281        | 0.293         | 0.166       | 0.336        |
| 50            | 1.876              | <0.001      | 0.014         | 0.030      | 0.006        | 0.041         | 0.024       | 0.120          | 0.012        | 0.467        | 0.473         | 0.110       | 0.486        |
| 55            | 1.073              | <0.001      | 0.010         | 0.016      | 0.007        | 0.053         | 0.010       | 0.067          | 0.008        | 0.483        | 0.488         | 0.059       | 0.491        |
| 60            | 0.846              | <0.001      | 0.009         | 0.004      | 0.008        | 0.098         | 0.006       | 0.044          | 0.006        | 0.686        | 0.694         | 0.039       | 0.695        |
| 65            | 1.725              | <0.001      | 0.016         | 0.035      | 0.016        | 0.286         | 0.021       | 0.082          | 0.021        | 1.789        | 1.813         | 0.074       | 1.815        |
| 70            | 4.005              | <0.001      | 0.031         | 0.114      | 0.030        | 0.876         | 0.045       | 0.173          | 0.077        | 5.159        | 5.234         | 0.197       | 5.238        |
| 74            | 5.976              | <0.001      | 0.034         | 0.195      | 0.031        | 1.427         | 0.051       | 0.206          | 0.134        | 7.761        | 7.892         | 0.288       | 7.898        |

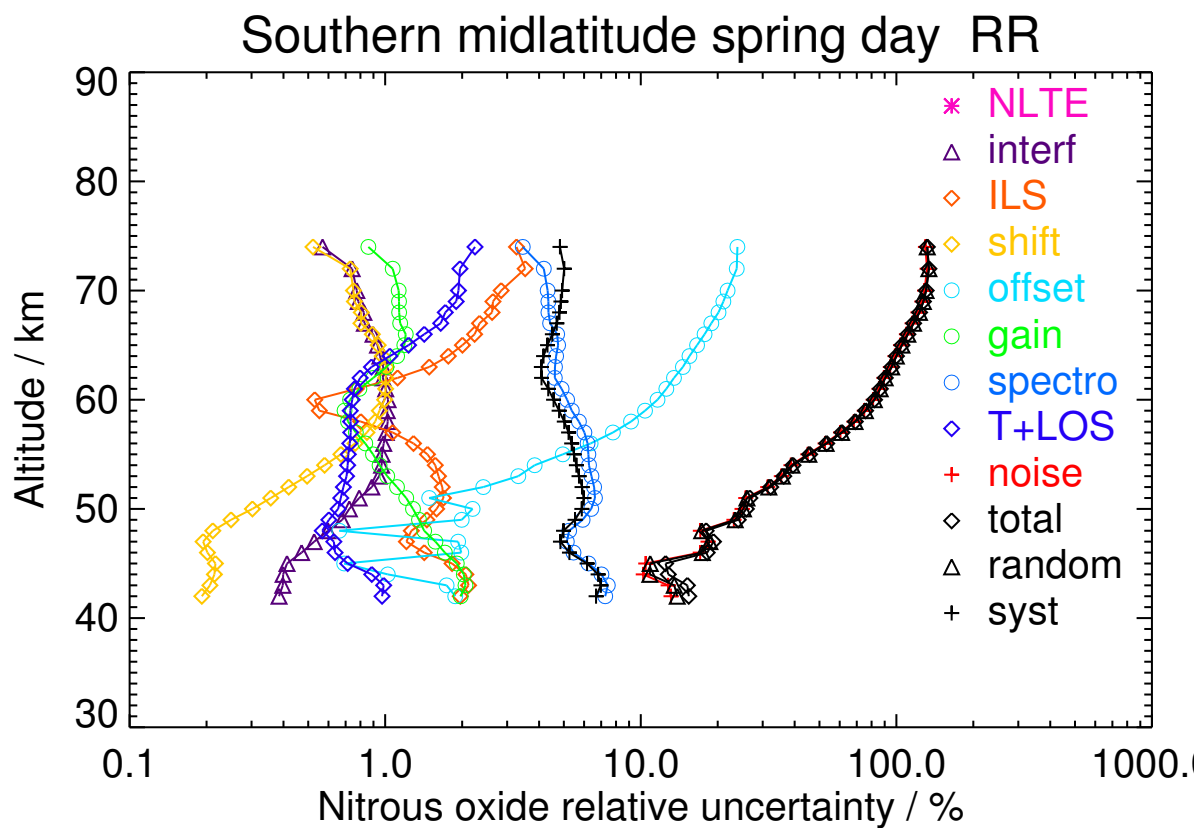

**Figure S259.** V8R\_N2O\_662 Southern midlatitude spring day

**Table S260.** Nitrous oxide error budget for Southern midlatitude spring night. All uncertainties are  $1\sigma$ .

| altitude<br>(km) | mean target<br>(ppbv) | NLTE<br>(ppbv) | interf<br>(ppbv) | ILS<br>(ppbv) | shift<br>(ppbv) | offset<br>(ppbv) | gain<br>(ppbv) | spectro<br>(ppbv) | T+LOS<br>(ppbv) | noise<br>(ppbv) | random<br>(ppbv) | syst<br>(ppbv) | total<br>(ppbv) |
|------------------|-----------------------|----------------|------------------|---------------|-----------------|------------------|----------------|-------------------|-----------------|-----------------|------------------|----------------|-----------------|
| 45               | 2.630                 | <0.001         | 0.011            | 0.050         | 0.006           | 0.024            | 0.048          | 0.170             | 0.019           | 0.288           | 0.299            | 0.169          | 0.343           |
| 50               | 1.617                 | <0.001         | 0.013            | 0.025         | 0.005           | 0.032            | 0.018          | 0.092             | 0.009           | 0.404           | 0.407            | 0.089          | 0.417           |
| 55               | 1.032                 | <0.001         | 0.011            | 0.015         | 0.007           | 0.055            | 0.008          | 0.057             | 0.007           | 0.482           | 0.486            | 0.053          | 0.489           |
| 60               | 0.738                 | <0.001         | 0.008            | 0.007         | 0.008           | 0.089            | 0.007          | 0.042             | 0.006           | 0.600           | 0.607            | 0.035          | 0.608           |
| 65               | 1.108                 | <0.001         | 0.010            | 0.030         | 0.010           | 0.193            | 0.009          | 0.046             | 0.010           | 1.236           | 1.251            | 0.051          | 1.252           |

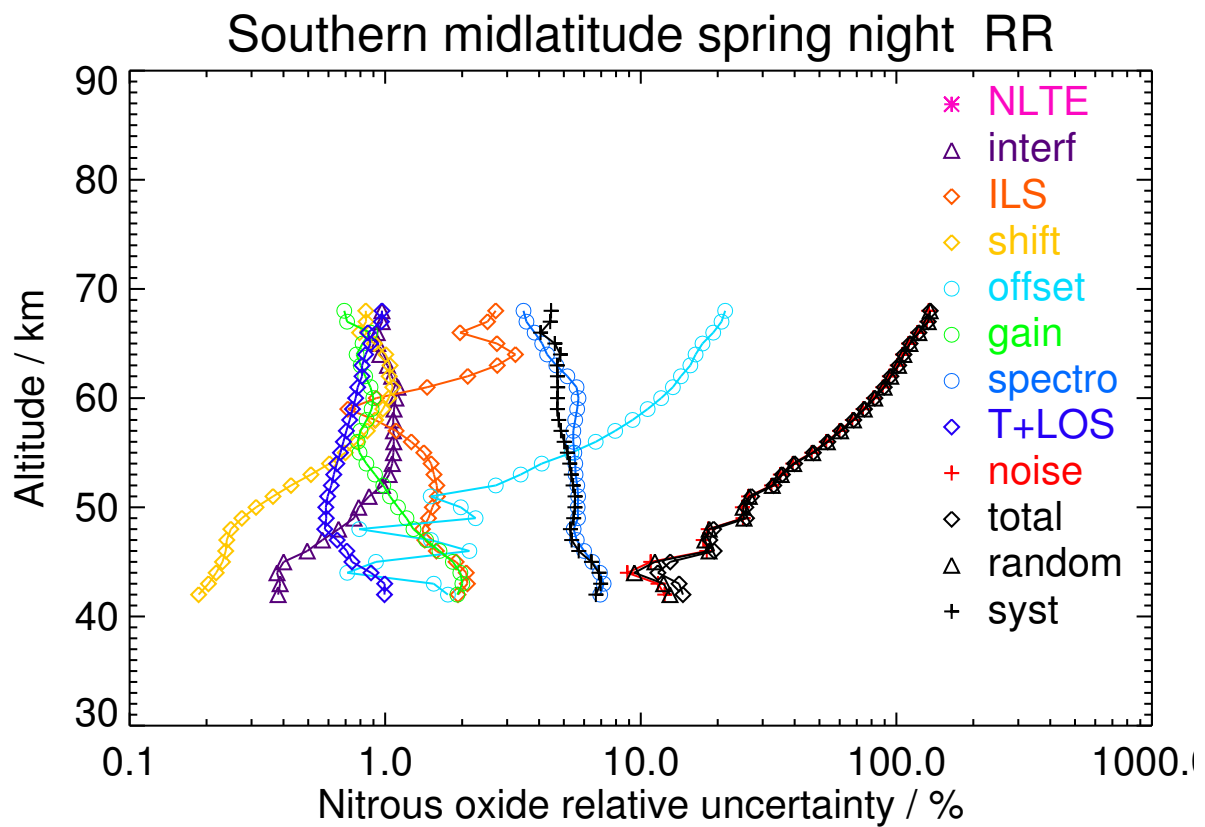**Figure S260.** V8R\_N2O\_662 Southern midlatitude spring night

**Table S261.** Nitrous oxide error budget for Southern midlatitude summer day. All uncertainties are  $1\sigma$ .

| altitude (km) | mean target (ppbv) | NLTE (ppbv) | interf (ppbv) | ILS (ppbv) | shift (ppbv) | offset (ppbv) | gain (ppbv) | spectro (ppbv) | T+LOS (ppbv) | noise (ppbv) | random (ppbv) | syst (ppbv) | total (ppbv) |
|---------------|--------------------|-------------|---------------|------------|--------------|---------------|-------------|----------------|--------------|--------------|---------------|-------------|--------------|
| 45            | 1.650              | <0.001      | 0.008         | 0.050      | 0.007        | 0.017         | 0.043       | 0.161          | 0.019        | 0.193        | 0.224         | 0.136       | 0.261        |
| 50            | 0.512              | <0.001      | 0.006         | 0.010      | 0.003        | 0.017         | 0.007       | 0.036          | 0.004        | 0.172        | 0.176         | 0.027       | 0.178        |
| 55            | 0.810              | <0.001      | 0.008         | 0.012      | 0.005        | 0.034         | 0.011       | 0.053          | 0.006        | 0.310        | 0.316         | 0.028       | 0.317        |
| 60            | 0.904              | <0.001      | 0.009         | 0.008      | 0.008        | 0.088         | 0.009       | 0.050          | 0.007        | 0.594        | 0.602         | 0.036       | 0.603        |
| 65            | 1.919              | <0.001      | 0.023         | 0.126      | 0.023        | 0.313         | 0.024       | 0.127          | 0.035        | 1.930        | 1.961         | 0.111       | 1.964        |
| 70            | 7.336              | 0.004       | 0.104         | 0.991      | 0.102        | 1.657         | 0.075       | 0.619          | 0.307        | 9.345        | 9.538         | 0.755       | 9.568        |
| 74            | 10.434             | 0.005       | 0.128         | 1.113      | 0.121        | 2.701         | 0.045       | 0.547          | 0.471        | 13.440       | 13.718        | 1.241       | 13.774       |

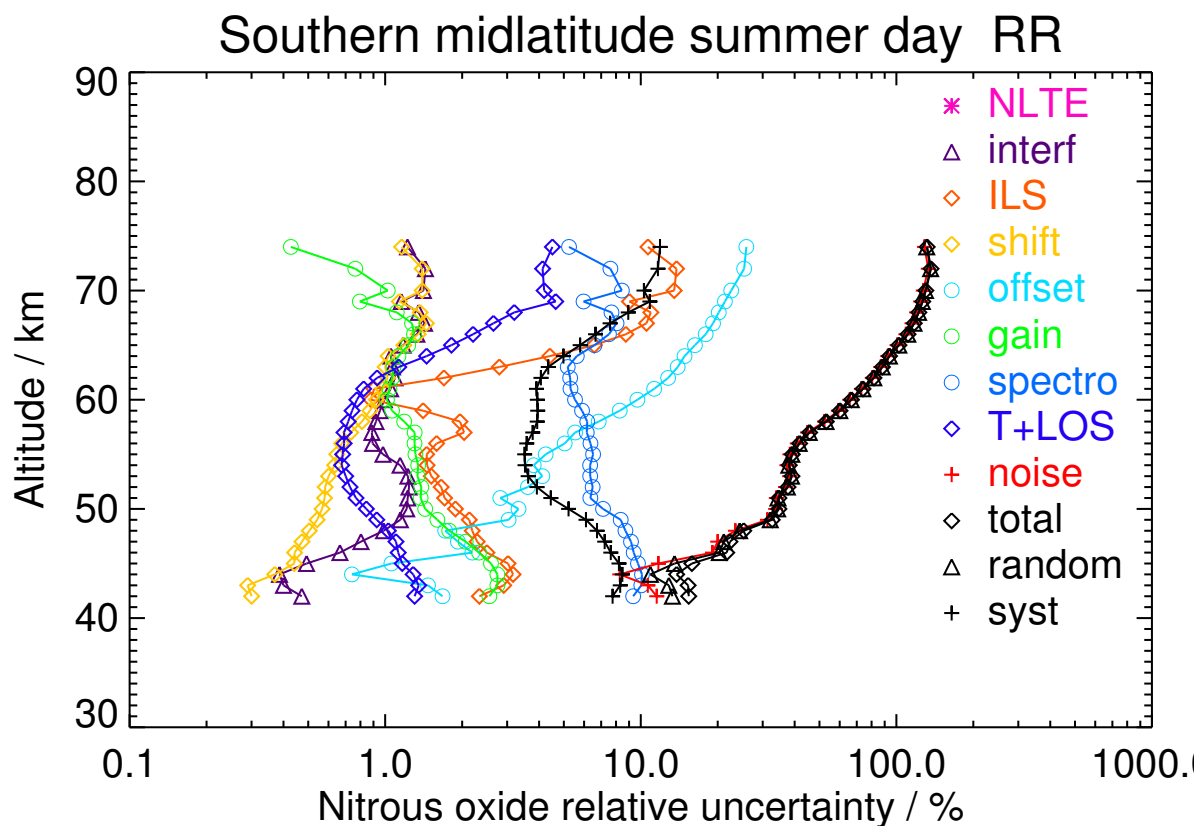

**Figure S261.** V8R\_N2O\_662 Southern midlatitude summer day

**Table S262.** Nitrous oxide error budget for Southern midlatitude summer night. All uncertainties are  $1\sigma$ .

| altitude (km) | mean target (ppbv) | NLTE (ppbv) | interf (ppbv) | ILS (ppbv) | shift (ppbv) | offset (ppbv) | gain (ppbv) | spectro (ppbv) | T+LOS (ppbv) | noise (ppbv) | random (ppbv) | syst (ppbv) | total (ppbv) |
|---------------|--------------------|-------------|---------------|------------|--------------|---------------|-------------|----------------|--------------|--------------|---------------|-------------|--------------|
| 45            | 3.202              | <0.001      | 0.012         | 0.097      | 0.020        | 0.030         | 0.117       | 0.277          | 0.026        | 0.263        | 0.350         | 0.220       | 0.414        |
| 50            | 2.049              | <0.001      | 0.010         | 0.045      | 0.007        | 0.038         | 0.071       | 0.211          | 0.020        | 0.318        | 0.381         | 0.096       | 0.393        |
| 55            | 1.395              | <0.001      | 0.009         | 0.041      | 0.006        | 0.050         | 0.025       | 0.162          | 0.015        | 0.454        | 0.479         | 0.089       | 0.487        |
| 60            | 0.908              | <0.001      | 0.010         | 0.009      | 0.008        | 0.096         | 0.007       | 0.060          | 0.009        | 0.640        | 0.649         | 0.046       | 0.650        |
| 65            | 1.099              | <0.001      | 0.014         | 0.046      | 0.011        | 0.200         | 0.007       | 0.057          | 0.012        | 1.203        | 1.220         | 0.063       | 1.222        |
| 70            | 1.566              | <0.001      | 0.027         | 0.052      | 0.021        | 0.417         | 0.009       | 0.056          | 0.017        | 2.075        | 2.117         | 0.077       | 2.118        |

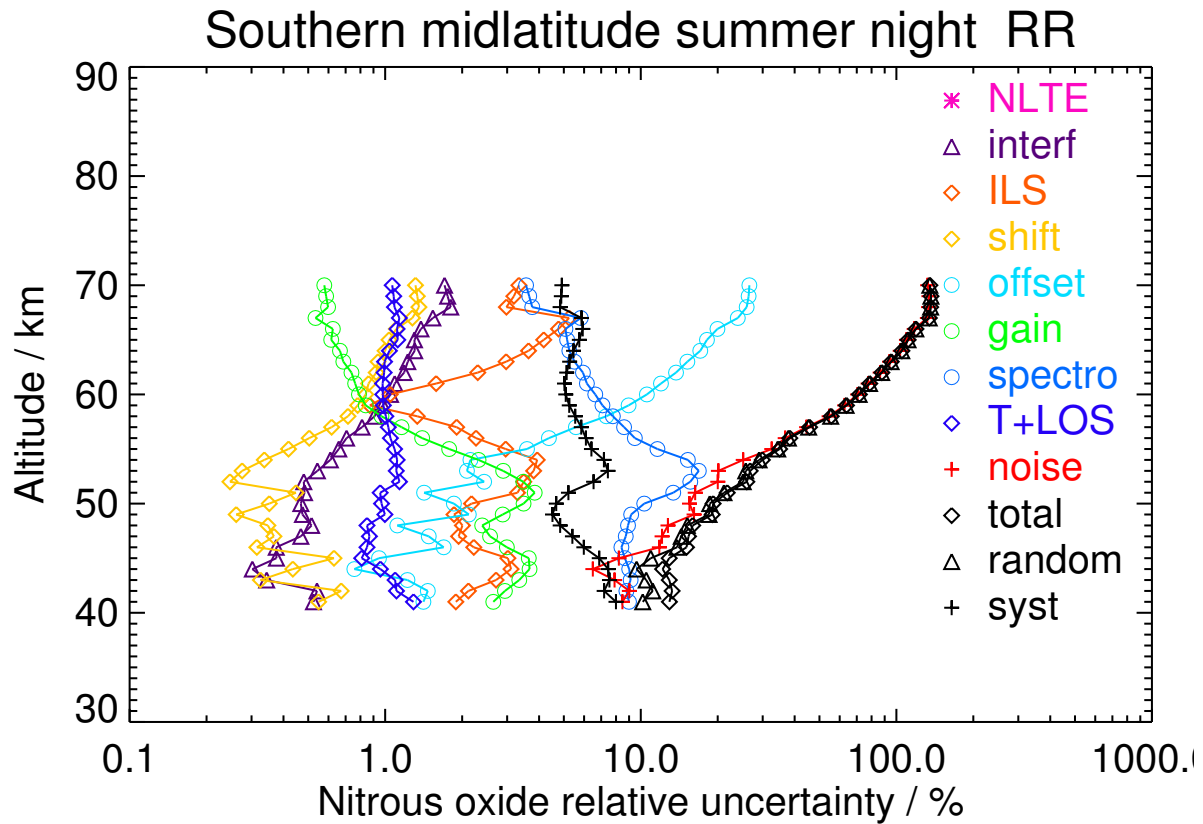

**Figure S262.** V8R\_N2O\_662 Southern midlatitude summer night

**Table S263.** Nitrous oxide error budget for Southern midlatitude autumn day. All uncertainties are  $1\sigma$ .

| altitude (km) | mean target (ppbv) | NLTE (ppbv) | interf (ppbv) | ILS (ppbv) | shift (ppbv) | offset (ppbv) | gain (ppbv) | spectro (ppbv) | T+LOS (ppbv) | noise (ppbv) | random (ppbv) | syst (ppbv) | total (ppbv) |
|---------------|--------------------|-------------|---------------|------------|--------------|---------------|-------------|----------------|--------------|--------------|---------------|-------------|--------------|
| 45            | 4.560              | <0.001      | 0.017         | 0.126      | 0.016        | 0.036         | 0.165       | 0.423          | 0.038        | 0.449        | 0.563         | 0.330       | 0.653        |
| 50            | 2.344              | <0.001      | 0.014         | 0.056      | 0.007        | 0.057         | 0.042       | 0.215          | 0.022        | 0.587        | 0.608         | 0.174       | 0.633        |
| 55            | 1.407              | <0.001      | 0.012         | 0.019      | 0.008        | 0.084         | 0.014       | 0.091          | 0.012        | 0.701        | 0.708         | 0.082       | 0.713        |
| 60            | 1.219              | <0.001      | 0.011         | 0.009      | 0.010        | 0.159         | 0.010       | 0.064          | 0.012        | 1.035        | 1.048         | 0.056       | 1.050        |
| 65            | 2.380              | <0.001      | 0.024         | 0.092      | 0.016        | 0.446         | 0.022       | 0.141          | 0.043        | 2.661        | 2.702         | 0.108       | 2.704        |
| 70            | 5.259              | 0.002       | 0.057         | 0.310      | 0.024        | 1.238         | 0.035       | 0.340          | 0.156        | 7.161        | 7.278         | 0.302       | 7.284        |
| 74            | 6.424              | 0.002       | 0.061         | 0.303      | 0.016        | 1.638         | 0.018       | 0.288          | 0.219        | 8.320        | 8.483         | 0.418       | 8.493        |

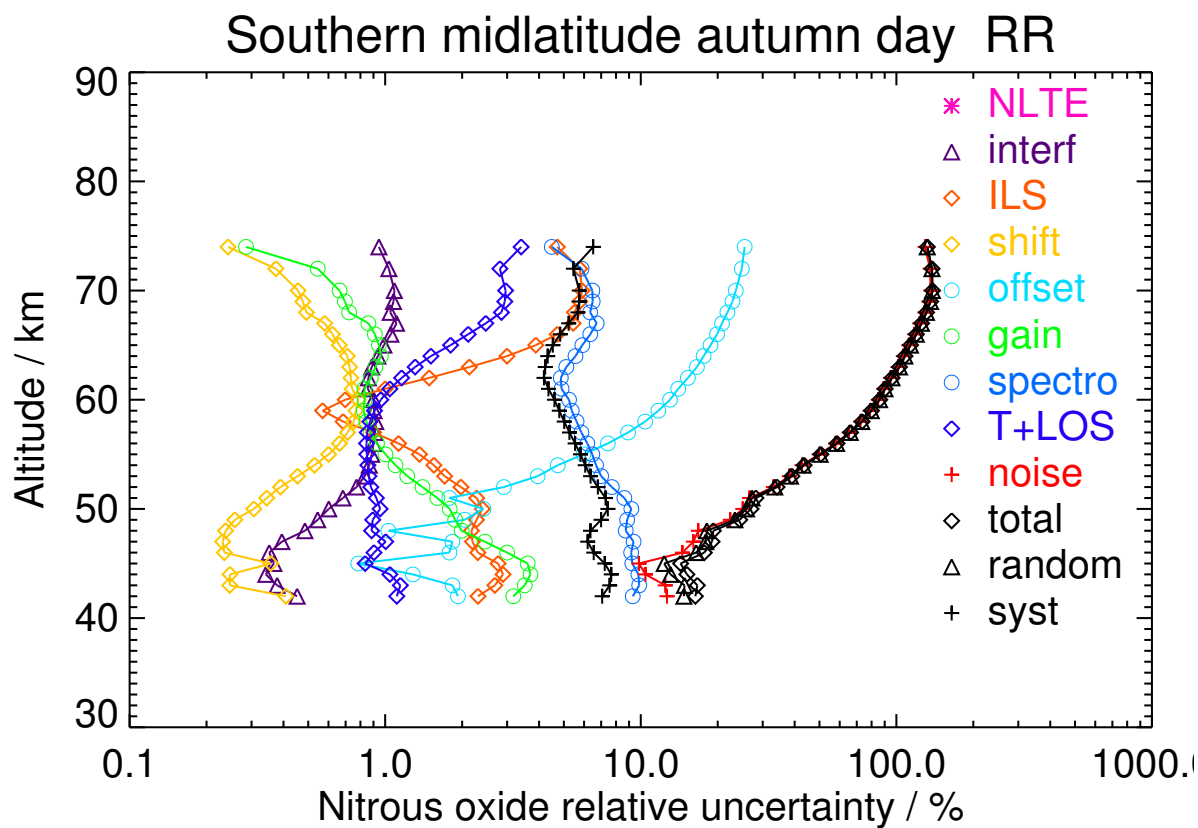

**Figure S263.** V8R\_N2O\_662 Southern midlatitude autumn day

**Table S264.** Nitrous oxide error budget for Southern midlatitude autumn night. All uncertainties are  $1\sigma$ .

| altitude<br>(km) | mean target<br>(ppbv) | NLTE<br>(ppbv) | interf<br>(ppbv) | ILS<br>(ppbv) | shift<br>(ppbv) | offset<br>(ppbv) | gain<br>(ppbv) | spectro<br>(ppbv) | T+LOS<br>(ppbv) | noise<br>(ppbv) | random<br>(ppbv) | syst<br>(ppbv) | total<br>(ppbv) |
|------------------|-----------------------|----------------|------------------|---------------|-----------------|------------------|----------------|-------------------|-----------------|-----------------|------------------|----------------|-----------------|
| 45               | 7.016                 | <0.001         | 0.022            | 0.190         | 0.031           | 0.057            | 0.230          | 0.579             | 0.059           | 0.552           | 0.684            | 0.519          | 0.859           |
| 50               | 3.264                 | <0.001         | 0.016            | 0.069         | 0.008           | 0.068            | 0.055          | 0.261             | 0.030           | 0.667           | 0.688            | 0.230          | 0.726           |
| 55               | 1.755                 | <0.001         | 0.013            | 0.024         | 0.008           | 0.086            | 0.018          | 0.117             | 0.017           | 0.752           | 0.759            | 0.106          | 0.767           |
| 60               | 1.149                 | <0.001         | 0.010            | 0.011         | 0.008           | 0.142            | 0.008          | 0.067             | 0.012           | 0.961           | 0.972            | 0.062          | 0.974           |
| 65               | 1.457                 | <0.001         | 0.013            | 0.035         | 0.011           | 0.289            | 0.011          | 0.071             | 0.018           | 1.775           | 1.799            | 0.069          | 1.800           |
| 70               | 3.268                 | <0.001         | 0.032            | 0.114         | 0.023           | 0.925            | 0.029          | 0.133             | 0.056           | 5.164           | 5.247            | 0.167          | 5.249           |

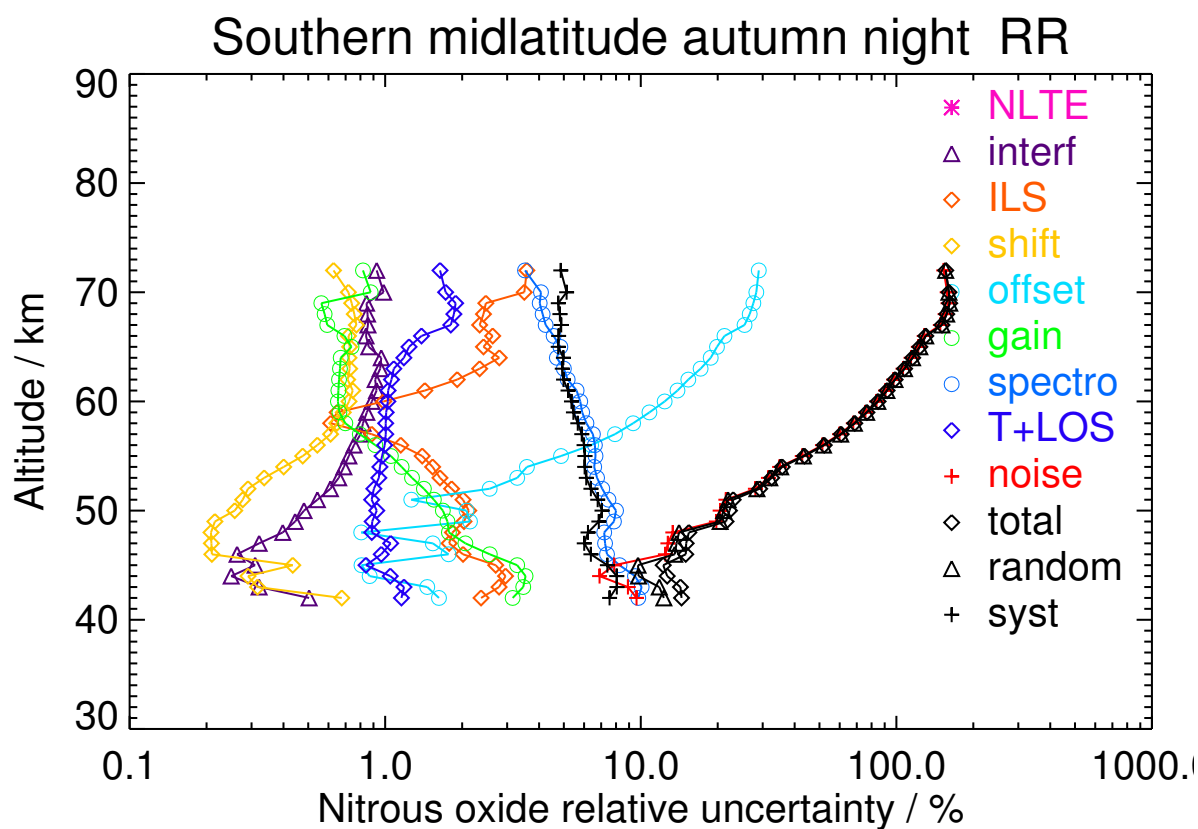**Figure S264.** V8R\_N2O\_662 Southern midlatitude autumn night

**Table S265.** Nitrous oxide error budget for Southern polar winter day. All uncertainties are  $1\sigma$ .

| altitude (km) | mean target (ppbv) | NLTE (ppbv) | interf (ppbv) | ILS (ppbv) | shift (ppbv) | offset (ppbv) | gain (ppbv) | spectro (ppbv) | T+LOS (ppbv) | noise (ppbv) | random (ppbv) | syst (ppbv) | total (ppbv) |
|---------------|--------------------|-------------|---------------|------------|--------------|---------------|-------------|----------------|--------------|--------------|---------------|-------------|--------------|
| 45            | 1.110              | <0.001      | 0.013         | 0.013      | 0.004        | 0.018         | 0.011       | 0.052          | 0.006        | 0.297        | 0.299         | 0.047       | 0.303        |
| 50            | 0.743              | <0.001      | 0.010         | 0.010      | 0.006        | 0.027         | 0.005       | 0.034          | 0.005        | 0.300        | 0.302         | 0.033       | 0.304        |
| 55            | 0.639              | <0.001      | 0.008         | 0.008      | 0.006        | 0.056         | 0.004       | 0.028          | 0.004        | 0.405        | 0.410         | 0.025       | 0.410        |
| 60            | 0.872              | <0.001      | 0.009         | 0.009      | 0.007        | 0.122         | 0.008       | 0.036          | 0.005        | 0.772        | 0.782         | 0.032       | 0.783        |
| 65            | 1.629              | <0.001      | 0.015         | 0.007      | 0.014        | 0.333         | 0.018       | 0.066          | 0.014        | 2.020        | 2.048         | 0.059       | 2.049        |
| 70            | 3.167              | 0.001       | 0.023         | 0.022      | 0.019        | 0.797         | 0.045       | 0.127          | 0.039        | 4.677        | 4.745         | 0.118       | 4.747        |

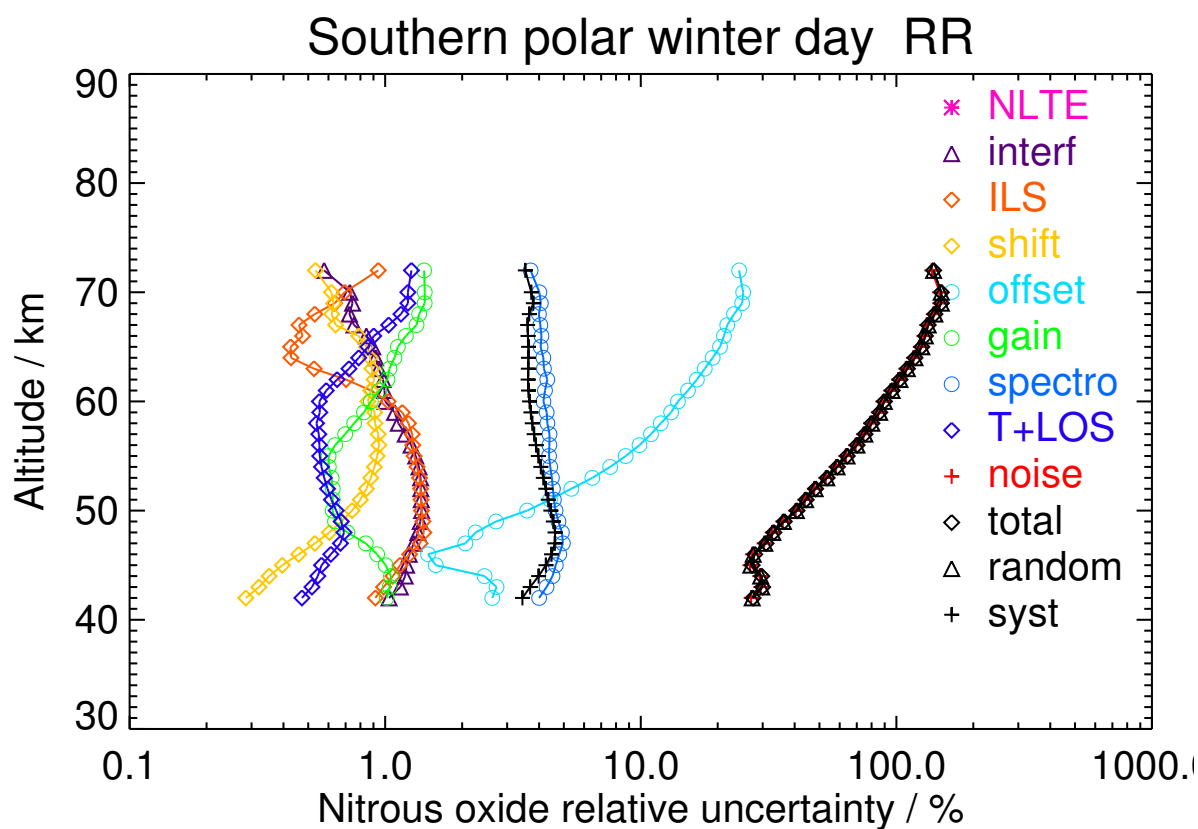

**Figure S265.** V8R\_N2O\_662 Southern polar winter day



**Table S266.** Nitrous oxide error budget for Southern polar winter night. All uncertainties are  $1\sigma$ .

| altitude<br>(km) | mean target<br>(ppbv) | NLTE<br>(ppbv) | interf<br>(ppbv) | ILS<br>(ppbv) | shift<br>(ppbv) | offset<br>(ppbv) | gain<br>(ppbv) | spectro<br>(ppbv) | T+LOS<br>(ppbv) | noise<br>(ppbv) | random<br>(ppbv) | syst<br>(ppbv) | total<br>(ppbv) |
|------------------|-----------------------|----------------|------------------|---------------|-----------------|------------------|----------------|-------------------|-----------------|-----------------|------------------|----------------|-----------------|
| 45               | 0.383                 | <0.001         | 0.009            | 0.004         | 0.003           | 0.020            | 0.002          | 0.015             | 0.002           | 0.203           | 0.204            | 0.012          | 0.205           |
| 50               | 0.366                 | <0.001         | 0.009            | 0.004         | 0.004           | 0.034            | 0.003          | 0.017             | 0.003           | 0.242           | 0.244            | 0.014          | 0.245           |
| 55               | 0.422                 | <0.001         | 0.008            | 0.005         | 0.005           | 0.061            | 0.004          | 0.020             | 0.003           | 0.374           | 0.379            | 0.017          | 0.379           |
| 60               | 0.698                 | <0.001         | 0.010            | 0.009         | 0.007           | 0.122            | 0.006          | 0.034             | 0.004           | 0.698           | 0.709            | 0.027          | 0.709           |
| 65               | 3.214                 | <0.001         | 0.028            | 0.040         | 0.018           | 0.654            | 0.034          | 0.150             | 0.032           | 3.641           | 3.700            | 0.149          | 3.703           |

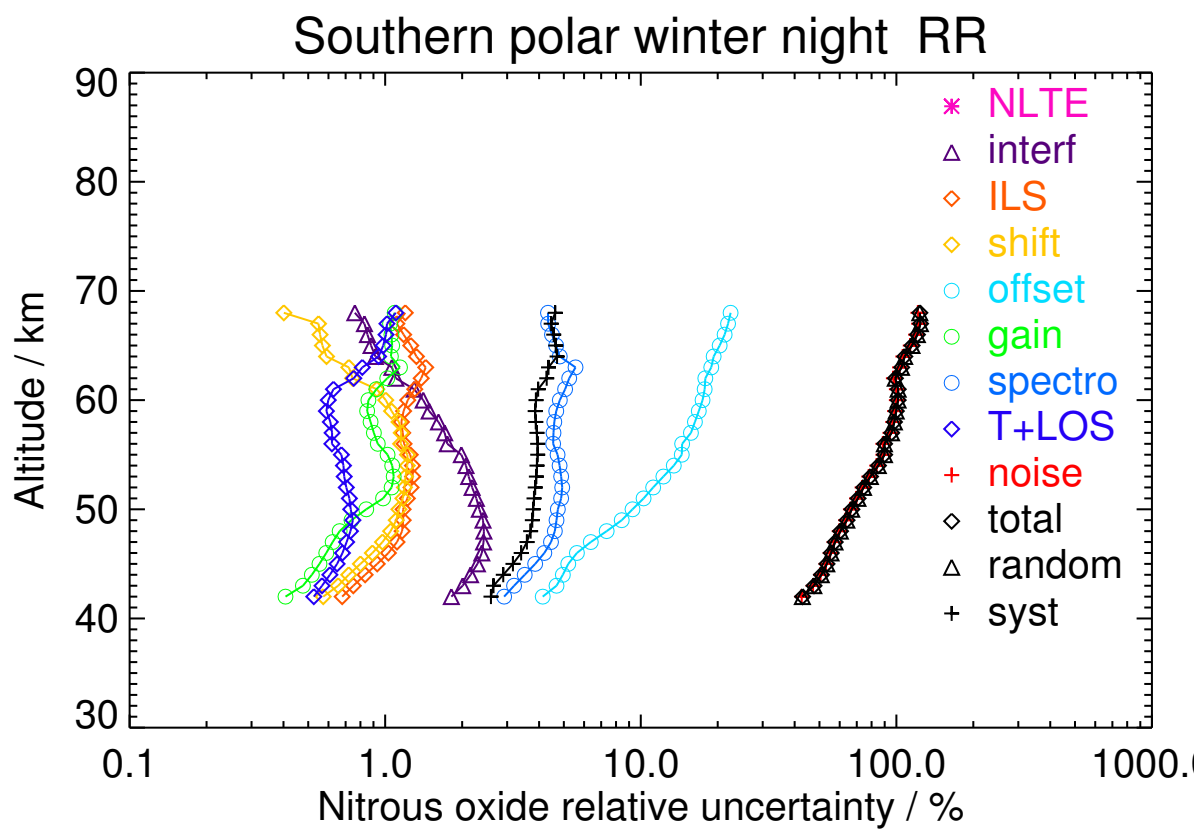**Figure S266.** V8R\_N2O\_662 Southern polar winter night

**Table S267.** Nitrous oxide error budget for Southern polar spring day. All uncertainties are  $1\sigma$ .

| altitude (km) | mean target (ppbv) | NLTE (ppbv) | interf (ppbv) | ILS (ppbv) | shift (ppbv) | offset (ppbv) | gain (ppbv) | spectro (ppbv) | T+LOS (ppbv) | noise (ppbv) | random (ppbv) | syst (ppbv) | total (ppbv) |
|---------------|--------------------|-------------|---------------|------------|--------------|---------------|-------------|----------------|--------------|--------------|---------------|-------------|--------------|
| 45            | 1.883              | <0.001      | 0.009         | 0.032      | 0.005        | 0.013         | 0.029       | 0.102          | 0.013        | 0.199        | 0.205         | 0.103       | 0.229        |
| 50            | 1.229              | <0.001      | 0.011         | 0.019      | 0.005        | 0.027         | 0.011       | 0.066          | 0.007        | 0.327        | 0.330         | 0.064       | 0.336        |
| 55            | 0.693              | <0.001      | 0.009         | 0.010      | 0.007        | 0.039         | 0.003       | 0.037          | 0.006        | 0.337        | 0.340         | 0.035       | 0.342        |
| 60            | 0.465              | <0.001      | 0.007         | 0.006      | 0.007        | 0.060         | 0.002       | 0.022          | 0.004        | 0.410        | 0.415         | 0.021       | 0.415        |
| 65            | 1.327              | <0.001      | 0.017         | 0.062      | 0.021        | 0.229         | 0.008       | 0.061          | 0.015        | 1.448        | 1.467         | 0.074       | 1.469        |
| 70            | 3.583              | 0.002       | 0.040         | 0.310      | 0.062        | 0.774         | 0.028       | 0.189          | 0.073        | 4.519        | 4.590         | 0.316       | 4.600        |
| 74            | 6.671              | 0.008       | 0.066         | 0.854      | 0.122        | 1.681         | 0.047       | 0.293          | 0.165        | 8.885        | 9.059         | 0.758       | 9.090        |

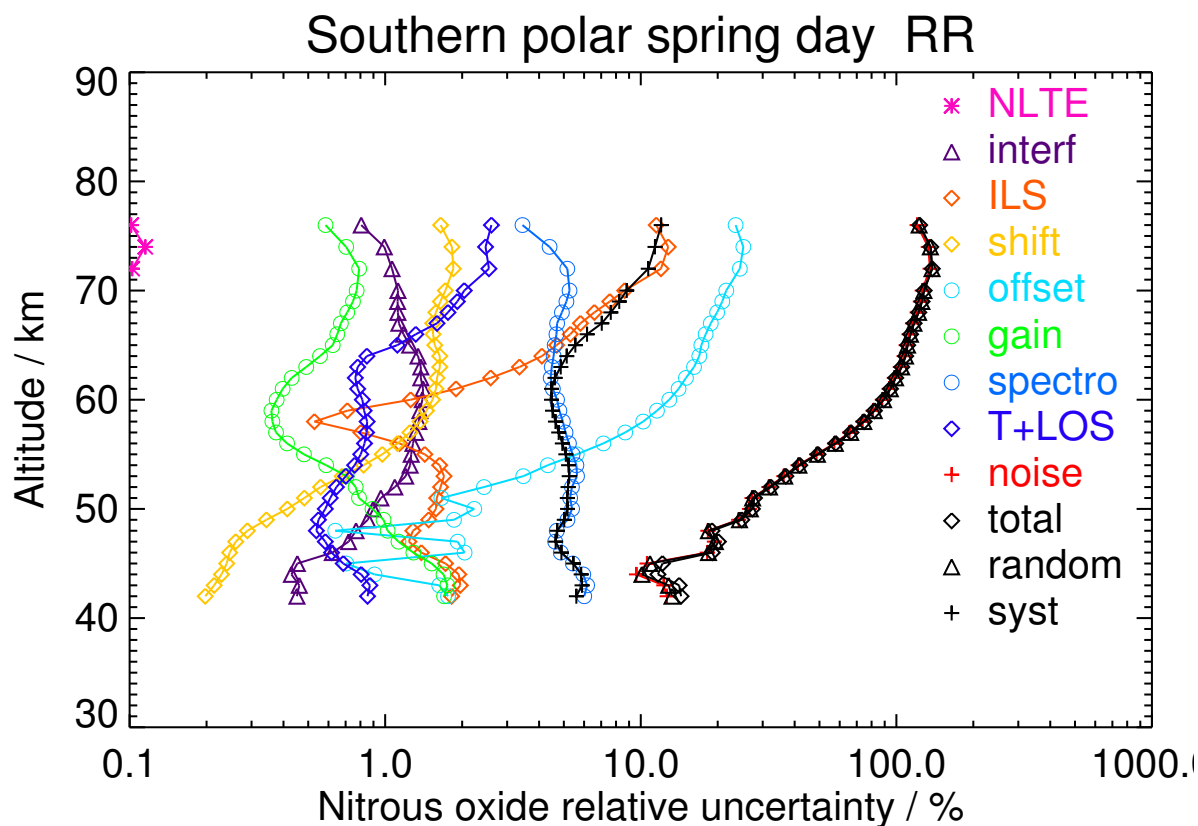

**Figure S267.** V8R\_N2O\_662 Southern polar spring day

**Table S268.** Nitrous oxide error budget for Southern polar spring night. All uncertainties are  $1\sigma$ .

| altitude (km) | mean target (ppbv) | NLTE (ppbv) | interf (ppbv) | ILS (ppbv) | shift (ppbv) | offset (ppbv) | gain (ppbv) | spectro (ppbv) | T+LOS (ppbv) | noise (ppbv) | random (ppbv) | syst (ppbv) | total (ppbv) |
|---------------|--------------------|-------------|---------------|------------|--------------|---------------|-------------|----------------|--------------|--------------|---------------|-------------|--------------|
| 45            | 2.681              | <0.001      | 0.011         | 0.046      | 0.006        | 0.021         | 0.049       | 0.158          | 0.015        | 0.271        | 0.284         | 0.151       | 0.322        |
| 50            | 1.836              | <0.001      | 0.013         | 0.030      | 0.005        | 0.038         | 0.024       | 0.106          | 0.011        | 0.439        | 0.444         | 0.099       | 0.455        |
| 55            | 1.169              | <0.001      | 0.011         | 0.017      | 0.008        | 0.056         | 0.010       | 0.067          | 0.008        | 0.519        | 0.523         | 0.060       | 0.527        |
| 60            | 0.912              | <0.001      | 0.009         | 0.010      | 0.009        | 0.106         | 0.007       | 0.048          | 0.008        | 0.726        | 0.734         | 0.040       | 0.736        |
| 65            | 1.784              | <0.001      | 0.018         | 0.074      | 0.020        | 0.322         | 0.016       | 0.085          | 0.026        | 1.990        | 2.018         | 0.090       | 2.020        |
| 70            | 6.426              | <0.001      | 0.049         | 0.290      | 0.053        | 1.487         | 0.049       | 0.268          | 0.176        | 8.637        | 8.766         | 0.398       | 8.775        |

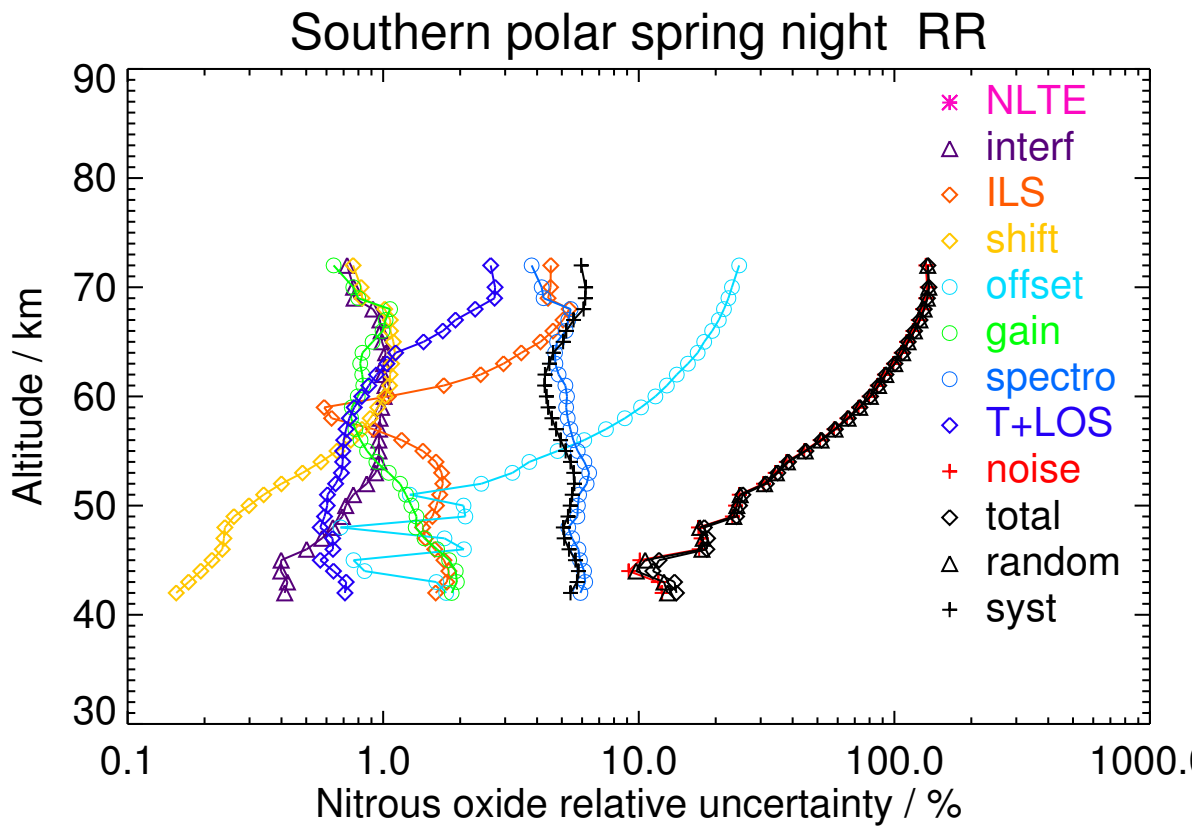

**Figure S268.** V8R\_N2O\_662 Southern polar spring night

**Table S269.** Nitrous oxide error budget for Southern polar summer day. All uncertainties are  $1\sigma$ .

| altitude (km) | mean target (ppbv) | NLTE (ppbv) | interf (ppbv) | ILS (ppbv) | shift (ppbv) | offset (ppbv) | gain (ppbv) | spectro (ppbv) | T+LOS (ppbv) | noise (ppbv) | random (ppbv) | syst (ppbv) | total (ppbv) |
|---------------|--------------------|-------------|---------------|------------|--------------|---------------|-------------|----------------|--------------|--------------|---------------|-------------|--------------|
| 45            | 1.470              | <0.001      | 0.008         | 0.041      | 0.008        | 0.020         | 0.033       | 0.128          | 0.023        | 0.197        | 0.201         | 0.136       | 0.243        |
| 50            | 0.173              | <0.001      | 0.004         | 0.003      | 0.002        | 0.010         | 0.003       | 0.011          | 0.003        | 0.081        | 0.082         | 0.011       | 0.082        |
| 55            | 0.091              | <0.001      | 0.003         | <0.001     | 0.002        | 0.012         | 0.003       | 0.005          | 0.002        | 0.078        | 0.079         | 0.005       | 0.079        |
| 60            | 0.134              | <0.001      | 0.004         | 0.003      | 0.003        | 0.024         | 0.004       | 0.006          | 0.003        | 0.147        | 0.149         | 0.006       | 0.149        |
| 65            | 0.675              | <0.001      | 0.013         | 0.019      | 0.010        | 0.091         | 0.008       | 0.040          | 0.009        | 0.597        | 0.605         | 0.031       | 0.606        |
| 70            | 2.275              | <0.001      | 0.028         | 0.129      | 0.028        | 0.343         | 0.027       | 0.141          | 0.040        | 1.984        | 2.019         | 0.138       | 2.024        |
| 74            | 6.448              | 0.002       | 0.059         | 0.655      | 0.085        | 1.427         | 0.032       | 0.226          | 0.178        | 8.119        | 8.246         | 0.694       | 8.275        |

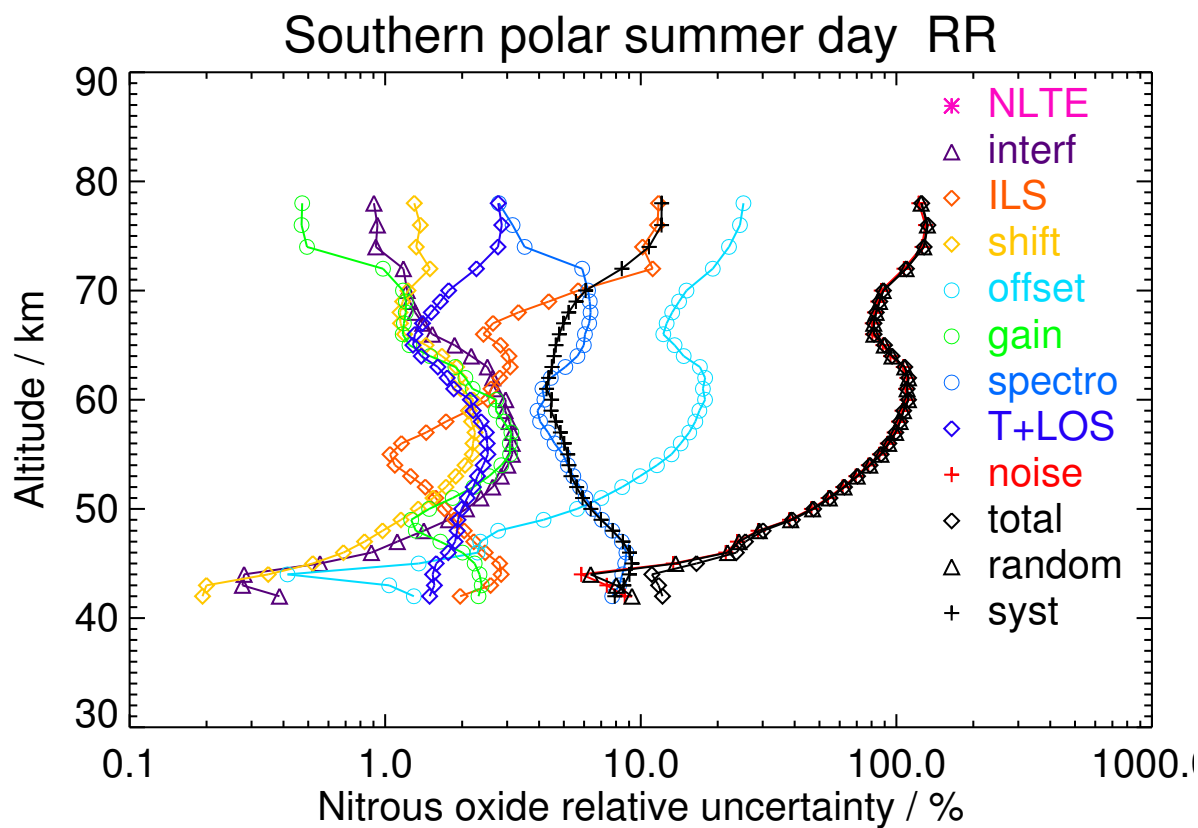

**Figure S269.** V8R\_N2O\_662 Southern polar summer day

**Table S270.** Nitrous oxide error budget for Southern polar summer night. All uncertainties are  $1\sigma$ .

| altitude<br>(km) | mean target<br>(ppbv) | NLTE<br>(ppbv) | interf<br>(ppbv) | ILS<br>(ppbv) | shift<br>(ppbv) | offset<br>(ppbv) | gain<br>(ppbv) | spectro<br>(ppbv) | T+LOS<br>(ppbv) | noise<br>(ppbv) | random<br>(ppbv) | syst<br>(ppbv) | total<br>(ppbv) |
|------------------|-----------------------|----------------|------------------|---------------|-----------------|------------------|----------------|-------------------|-----------------|-----------------|------------------|----------------|-----------------|
| 45               | 0.279                 | <0.001         | 0.005            | 0.007         | 0.002           | 0.010            | 0.002          | 0.024             | 0.005           | 0.091           | 0.093            | 0.021          | 0.095           |
| 50               | 0.123                 | <0.001         | 0.004            | 0.002         | 0.002           | 0.012            | 0.002          | 0.007             | 0.002           | 0.078           | 0.080            | 0.007          | 0.080           |
| 55               | 0.178                 | <0.001         | 0.005            | 0.002         | 0.003           | 0.027            | 0.003          | 0.008             | 0.002           | 0.157           | 0.160            | 0.008          | 0.160           |
| 60               | 0.290                 | <0.001         | 0.008            | <0.001        | 0.005           | 0.060            | 0.004          | 0.012             | 0.003           | 0.329           | 0.334            | 0.011          | 0.334           |
| 65               | 1.713                 | <0.001         | 0.026            | 0.020         | 0.019           | 0.367            | 0.009          | 0.068             | 0.019           | 1.948           | 1.983            | 0.072          | 1.984           |
| 70               | 2.178                 | <0.001         | 0.027            | 0.035         | 0.021           | 0.553            | 0.013          | 0.077             | 0.027           | 2.827           | 2.881            | 0.086          | 2.882           |

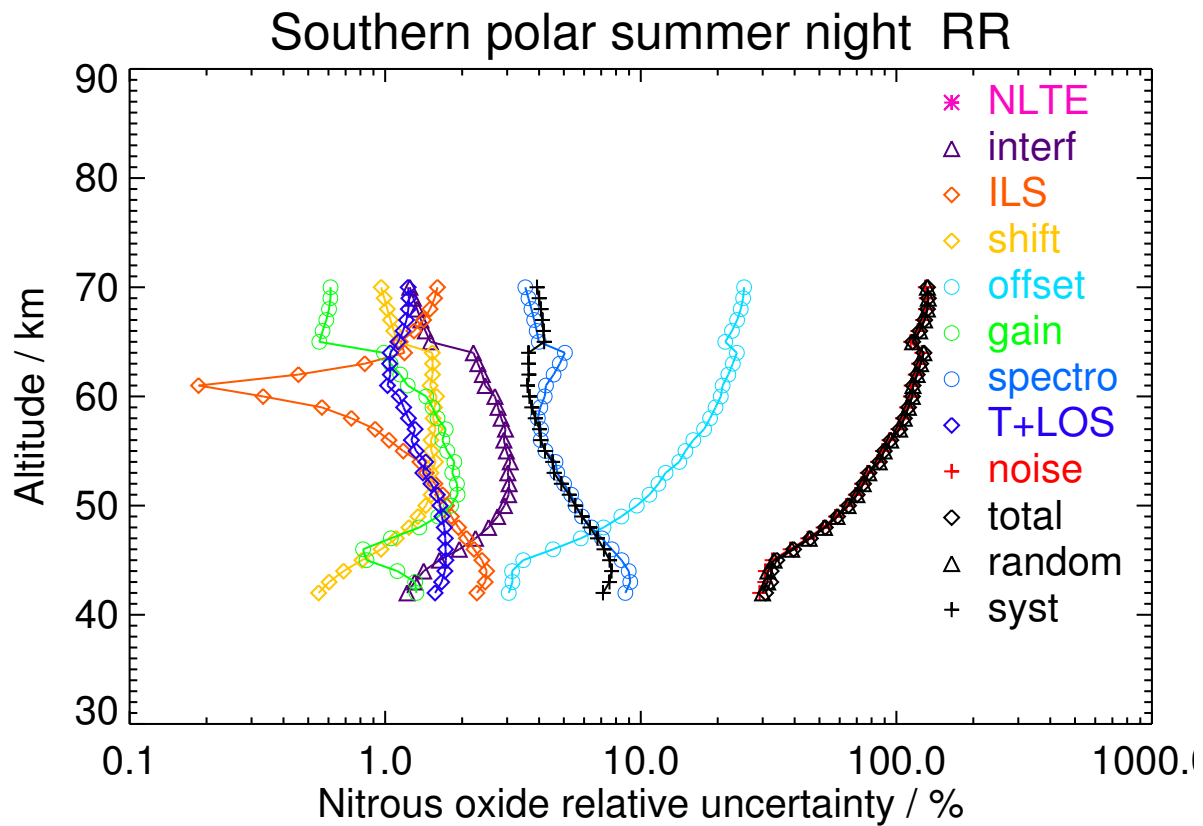**Figure S270.** V8R\_N2O\_662 Southern polar summer night

**Table S271.** Nitrous oxide error budget for Southern polar autumn day. All uncertainties are  $1\sigma$ .

| altitude (km) | mean target (ppbv) | NLTE (ppbv) | interf (ppbv) | ILS (ppbv) | shift (ppbv) | offset (ppbv) | gain (ppbv) | spectro (ppbv) | T+LOS (ppbv) | noise (ppbv) | random (ppbv) | syst (ppbv) | total (ppbv) |
|---------------|--------------------|-------------|---------------|------------|--------------|---------------|-------------|----------------|--------------|--------------|---------------|-------------|--------------|
| 45            | 0.321              | <0.001      | 0.006         | 0.005      | 0.002        | 0.015         | 0.004       | 0.020          | 0.002        | 0.159        | 0.161         | 0.011       | 0.162        |
| 50            | 0.351              | <0.001      | 0.008         | 0.004      | 0.004        | 0.029         | 0.003       | 0.017          | 0.002        | 0.221        | 0.223         | 0.013       | 0.224        |
| 55            | 0.472              | <0.001      | 0.009         | 0.007      | 0.006        | 0.062         | 0.004       | 0.022          | 0.003        | 0.374        | 0.380         | 0.018       | 0.380        |
| 60            | 0.695              | <0.001      | 0.011         | 0.008      | 0.009        | 0.132         | 0.006       | 0.031          | 0.005        | 0.739        | 0.751         | 0.027       | 0.752        |
| 65            | 2.298              | <0.001      | 0.021         | 0.024      | 0.018        | 0.505         | 0.033       | 0.115          | 0.028        | 2.799        | 2.845         | 0.098       | 2.847        |
| 70            | 2.631              | <0.001      | 0.021         | 0.024      | 0.017        | 0.685         | 0.037       | 0.118          | 0.036        | 3.644        | 3.708         | 0.106       | 3.710        |

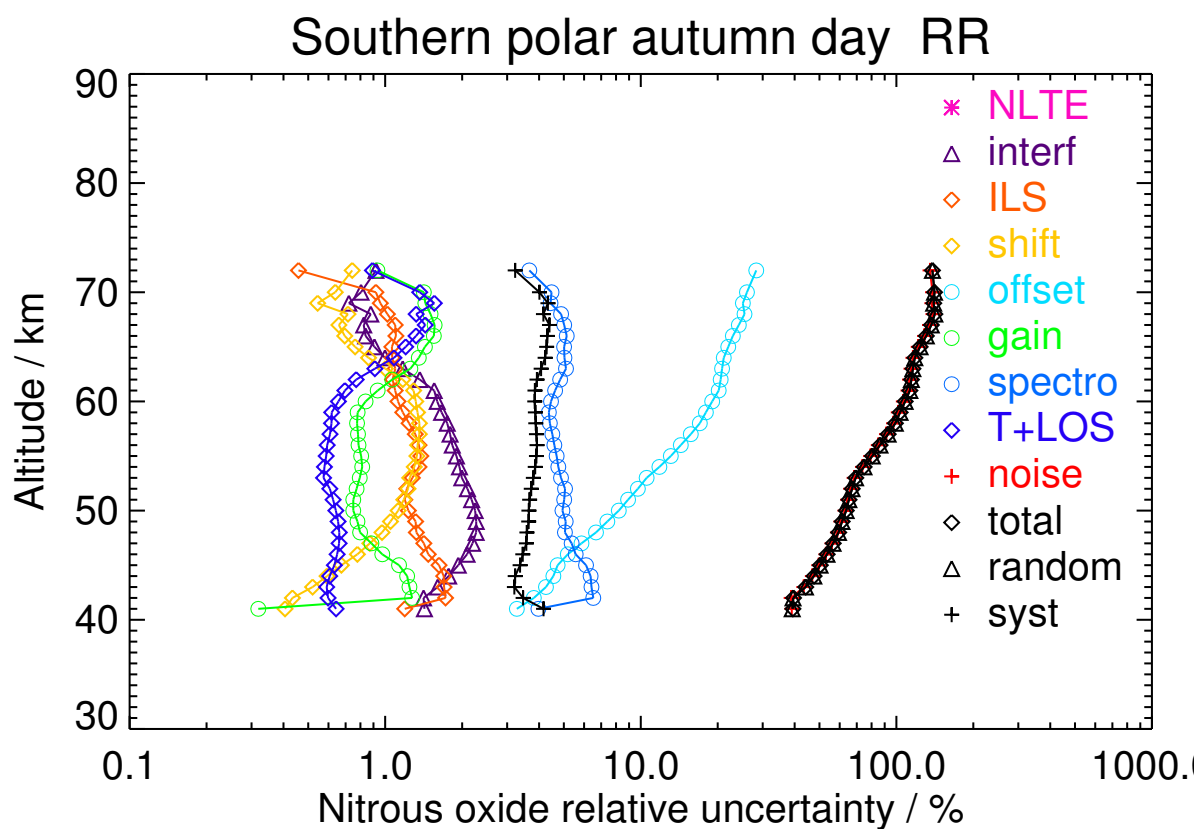

**Figure S271.** V8R\_N2O\_662 Southern polar autumn day

**Table S272.** Nitrous oxide error budget for Southern polar autumn night. All uncertainties are  $1\sigma$ .

| altitude<br>(km) | mean target<br>(ppbv) | NLTE<br>(ppbv) | interf<br>(ppbv) | ILS<br>(ppbv) | shift<br>(ppbv) | offset<br>(ppbv) | gain<br>(ppbv) | spectro<br>(ppbv) | T+LOS<br>(ppbv) | noise<br>(ppbv) | random<br>(ppbv) | syst<br>(ppbv) | total<br>(ppbv) |
|------------------|-----------------------|----------------|------------------|---------------|-----------------|------------------|----------------|-------------------|-----------------|-----------------|------------------|----------------|-----------------|
| 45               | 0.396                 | <0.001         | 0.008            | 0.003         | 0.003           | 0.019            | 0.002          | 0.014             | 0.002           | 0.205           | 0.206            | 0.012          | 0.206           |
| 50               | 0.444                 | <0.001         | 0.009            | 0.005         | 0.005           | 0.035            | 0.004          | 0.021             | 0.003           | 0.269           | 0.272            | 0.017          | 0.273           |
| 55               | 0.507                 | <0.001         | 0.009            | 0.007         | 0.006           | 0.067            | 0.004          | 0.025             | 0.003           | 0.410           | 0.416            | 0.021          | 0.417           |
| 60               | 0.727                 | <0.001         | 0.010            | 0.010         | 0.007           | 0.128            | 0.006          | 0.035             | 0.004           | 0.723           | 0.734            | 0.029          | 0.735           |
| 65               | 1.913                 | <0.001         | 0.015            | 0.025         | 0.009           | 0.371            | 0.023          | 0.081             | 0.017           | 2.095           | 2.128            | 0.076          | 2.129           |
| 70               | 2.487                 | <0.001         | 0.016            | 0.019         | 0.008           | 0.598            | 0.026          | 0.081             | 0.025           | 3.257           | 3.312            | 0.087          | 3.313           |

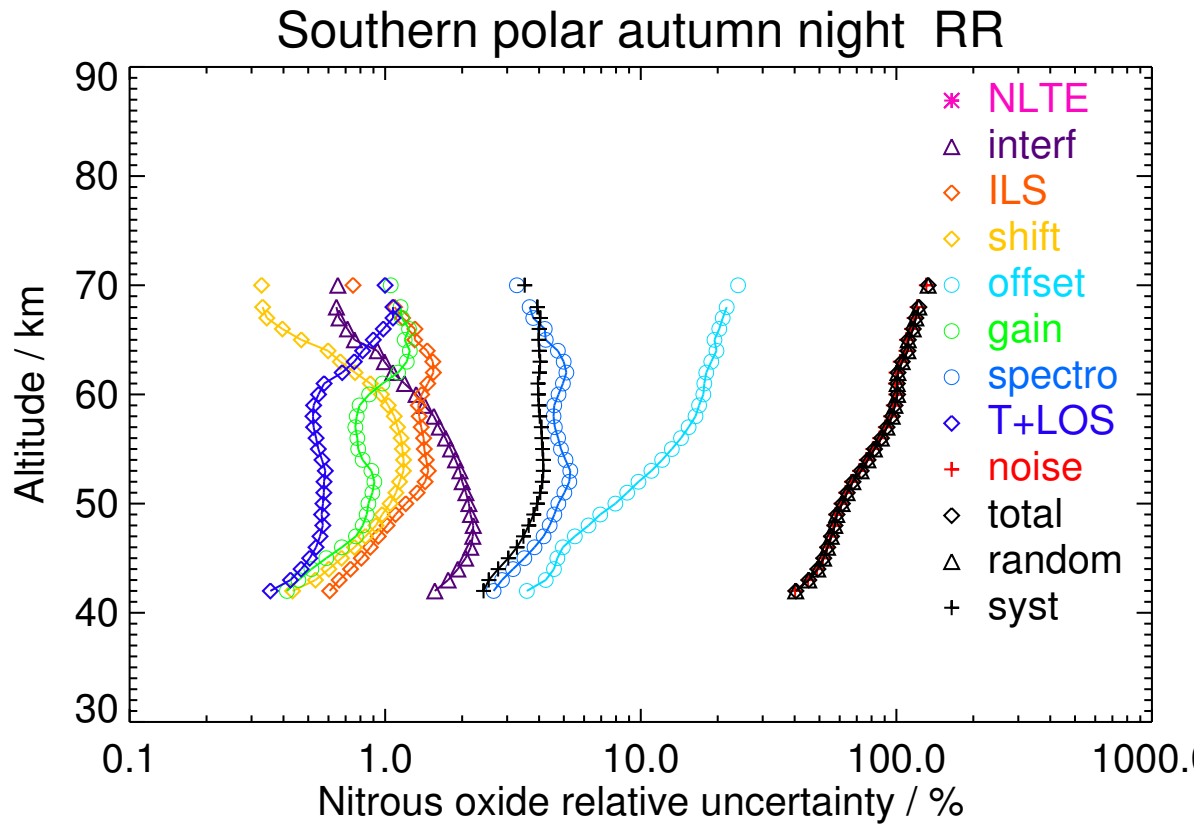**Figure S272.** V8R\_N2O\_662 Southern polar autumn night
